# Supplementary material for: Quantitative mapping of human hair greying and reversal in relation to life stress
Source: eLife. 2021 Jun 22;10:e67437. doi: 10.7554/eLife.67437 (PMC8219384; doi:10.7554/eLife.67437)
Supplement: Figure 1—figure supplement 1—source data 2. [file elife-67437-fig1-figsupp1-data2.xlsx]

## Sheet: A
	Dark						White
	1	2	3	4	5	6	1	2	3	4	5
ITIH4	2.25531	0.654176	1.38278	0.008184	1.20927	0.632806	3.1016	0.272919	0.848499	0.5077	0.126761
SERPINF2	2.68261	0.783977	1.70232	0.040401	1.64838	0.040401	2.5873	0.753313	0.040401	0.680502	0.040401
KRT2	1.69189	0.089016	0.510078	1.55993	1.94115	0.896668	0.410471	0.987865	0.982431	0.728846	1.20165
C3	1.67988	0.438238	2.20288	0.470885	1.49182	0.529115	1.85167	0.32709	1.3385	0.540178	0.129733
CALML5	0.412935	3.92522	1.1238	0.856707	0.026715	0.026715	1.62107	1.04229	1.08879	0.026715	0.849046
APOH	2.11151	0.911205	1.3302	0.562092	1.65079	0.852249	2.15377	0.537951	0.318839	0.56679	0.0046
ATP5B	0.003739	0.003739	0.562267	0.003739	0.003739	3.95513	1.88935	0.104542	1.97964	0.003739	2.49037
GSN	1.60878	0.640619	1.67857	1.00754	1.21016	0.770678	2.03231	0.485726	0.436393	1.03212	0.09711
HIST1H2BL;HIST1H2BM;HIST1H2BN;HIST1H2BH;HIST2H2BF;HIST1H2BC;HIST1H2BD;H2BFS;HIST1H2BK;HIST1H2BA	0.285396	0.092367	0.284988	1.42179	0.030349	4.85731	0.168722	1.10316	0.623388	0.34797	1.78455
AHSG	1.68472	1.02121	1.63017	0.553079	1.61294	0.005599	2.36749	0.711868	0.502902	0.841798	0.068227
KRT9	2.06385	0.427149	0.484169	1.65822	1.51443	0.860193	0.329054	0.927233	0.744311	0.58535	1.40605
APOA4	2.54882	0.559708	1.77965	0.58468	1.21571	0.392473	1.99524	0.717635	0.419336	0.608327	0.178412
KNG1	2.39186	0.920834	0.903143	0.539187	1.89752	0.447626	1.83448	0.696082	0.734103	0.558872	0.076291
IGKC	1.69085	0.823132	1.22791	0.754135	1.69234	0.914912	1.90761	0.63167	0.429225	0.834431	0.093783
KRTAP9-2	0.548501	1.9461	0.666696	2.85561	0.040684	0.040684	0.476259	1.67426	2.23385	0.351074	0.16628
APOA1	2.89084	0.420343	1.84428	0.202766	1.3114	0.004232	3.36937	0.22246	0.356233	0.344966	0.033115
C4A;C4B	2.75854	0.678087	1.57923	0.27344	1.63159	0.24783	2.95853	0.336208	0.201867	0.28073	0.053941
SACM1L	0.082783	3.39596	0.082783	0.726457	0.082783	0.082783	2.0224	1.82417	0.848193	1.62786	0.223835
SERPINC1	0.450436	0.194501	5.47045	0.169077	0.466279	0.004166	1.86383	0.097502	2.11893	0.132713	0.032107
APOC3	2.66521	0.442428	1.87607	0.822209	0.931138	0.51479	1.74499	1.11517	0.182742	0.520411	0.184839
KRT6C	1.20097	0.176829	1.20615	0.883811	0.694303	3.11918	0.597509	1.03901	0.528597	0.879492	0.674148
AMBP	2.26089	0.469342	1.77649	0.020575	1.46356	1.38891	1.91428	0.417306	0.020575	0.986375	0.281695
HPX	2.77772	0.45044	1.73742	0.720275	1.06658	0.575294	2.54713	0.336204	0.315952	0.392122	0.080851
FLG2	5.27125	0.07527	1.3066	0.07527	0.07527	0.07527	0.07527	3.20688	0.07527	0.07527	0.688379
GC	2.14953	0.971253	1.37435	0.636712	1.60931	0.629806	2.02956	0.657023	0.284286	0.598577	0.059605
ALB	2.84333	0.700881	1.37926	0.598494	1.27785	0.591657	2.06122	0.636055	0.317828	0.469248	0.124187
SERPING1	1.81238	0.545416	2.77418	0.777791	1.0553	0.463926	2.33609	0.435436	0.391102	0.366133	0.042247
AFM	2.94651	0.652498	1.59755	0.786011	1.01483	0.023276	2.45242	0.681067	0.29292	0.375374	0.177541
AZGP1	2.91632	0.537791	1.52994	0.972921	1.09351	0.025334	1.66181	0.900468	0.369985	0.441302	0.55062
ITIH2	2.94115	1.06429	1.50081	0.02596	1.58445	0.02596	1.88987	0.640749	0.322926	0.977876	0.02596
CFB	1.96611	0.750357	1.62578	0.867655	1.94948	0.015031	2.22615	0.324971	0.264427	0.837592	0.172445
KRTAP4-3	0.237029	4.98712	0.195216	1.85129	0.059184	0.295763	0.431358	1.70644	0.255298	0.446163	0.535133
SLC25A5	0.073891	1.02061	0.073891	0.073891	0.073891	4.86083	0.073891	0.073891	1.24563	1.49595	1.93363
	1.71457	2.17232	1.72666	0.768866	1.95666	0.007898	1.67822	0.674555	0.284448	0.007898	0.007898
DSG1	5.20702	0.104693	0.104693	0.104693	1.62242	0.104693	1.11429	0.104693	2.32343	0.104693	0.104693
CLU	2.86307	0.02959	0.02959	1.35977	2.4746	0.02959	2.44437	0.02959	0.591379	0.807693	0.340758
CP	2.55024	0.762452	2.33435	0.178335	1.76294	0.368687	1.85223	0.346396	0.383424	0.407923	0.053013
	1.00934	0.38605	1.89438	1.48581	2.42595	0.818412	1.58652	0.506455	0.36337	0.320978	0.20274
GPRC5D	0.053897	0.053897	0.053897	0.053897	2.23342	5.14546	0.053897	0.053897	0.053897	2.13436	1.10948
APOB	3.54828	0.685653	1.83892	0.427447	1.29968	0.004217	2.57629	0.138706	0.257485	0.159827	0.063502
KRTAP9-1	0.491445	5.60459	0.35435	1.0082	0.006424	0.006424	0.45142	1.68865	0.693766	0.289481	0.405246
DCD	4.49276	0.159851	1.66942	0.989535	0.758077	0.017899	0.629253	1.16058	0.654764	0.115079	0.352786
IGHA1	5.27032	0.088709	0.088709	0.088709	1.55547	0.088709	2.43439	0.088709	0.088709	0.824251	0.383314
HRNR	4.11379	0.157102	0.815571	1.27173	1.9585	0.390287	0.563494	0.611085	0.255289	0.613178	0.24998
KRTAP10-6	0.015621	5.7416	0.015621	0.679873	0.015621	0.015621	0.6079	1.0383	0.865396	1.24492	0.759517
KRTAP3-1	0.56712	5.21367	0.320687	0.557737	2.30646	0.034081	0.760783	0.138715	0.224691	0.533456	0.342601
KRTAP10-9	0.068546	6.36991	0.068546	0.954827	0.068546	0.068546	0.673725	0.068546	1.28927	1.23244	0.137091
KRTAP13-1	1.27083	7.84185	0.01087	0.01087	0.01087	0.01087	0.01087	1.0748	0.01087	0.01087	0.73643
KRTAP1-1	0.029149	0.029149	0.029149	0.717899	7.75377	0.029149	0.029149	0.029149	0.812263	1.09395	0.447228
MIF	0.016846	0.016846	0.387011	0.016846	0.016846	8.25381	0.016846	0.31746	0.45726	0.016846	1.48338
OFD1	10.6173	0.010268	0.010268	0.010268	0.184293	0.010268	0.010268	0.039377	0.010268	0.010268	0.087164
SELENBP1	0.00328	0.00328	0.040221	0.00328	0.026339	0.521466	0.00328	0.00328	1.34339	0.760609	8.29158
VDAC1	0.126035	0.033784	0.033784	0.158369	0.033784	0.033784	1.5037	2.49414	2.08641	0.155322	4.34088
	0.001236	0.001236	0.125266	0.062036	0.001236	0.52044	0.001236	0.285529	1.44125	7.15051	1.41003
ANXA2;ANXA2P2	0.009709	0.009709	0.09679	0.571685	0.081342	0.009709	0.340347	0.704917	1.91277	0.009709	7.25332
HEPHL1	0.187268	0.34813	0.372732	0.11923	0.002673	0.095098	0.197411	1.12243	2.20893	0.058514	6.28758
SFN	0.302772	0.006008	0.348219	0.228173	0.006008	0.006008	0.210295	2.40323	3.73124	0.006008	3.75204
UBA52;RPS27A;UBB;UBC	0.00494	0.00494	0.00494	0.179421	0.00494	0.517575	0.00494	0.527729	0.706327	8.74496	0.299289
SOD1	0.317895	0.080962	0.332746	0.715392	0.008205	0.156744	4.25602	4.03861	0.088508	0.700804	0.304114
DSP	0.474011	0.150954	0.495645	0.432794	0.246681	0.105147	0.341506	2.727	2.37911	0.443979	3.20317
HSPA2	0.67186	0.21409	0.304904	0.474543	0.012739	0.012739	0.437594	1.13869	2.63311	0.012739	5.08699
KRT14	0.814229	0.042566	0.042566	0.335533	0.042566	0.042566	0.042566	2.56529	2.09087	0.042566	4.93867
JUP	0.004119	0.299936	0.684512	0.148017	0.004119	1.07268	0.004119	0.685638	1.49514	0.004119	6.5976
ACTB;ACTG1	0.281226	0.182148	0.501741	0.337898	0.384755	0.390709	0.551014	2.57053	0.977452	0.203815	4.61871
TGM3	0.073375	0.020821	0.125233	0.162842	0.242464	1.52441	0.25972	1.53641	2.12669	0.206868	4.72117
DSG4	0.002839	0.002839	0.080114	0.117929	0.002839	1.27761	0.002839	0.57765	2.85142	0.663317	5.4206
KRT31	0.159115	0.000338	0.000338	0.016504	0.00395	1.87398	0.000338	0.028117	4.82159	0.080277	4.01546
DSG3	0.05633	0.353998	0.773355	0.05633	0.05633	0.05633	3.37411	5.42757	0.331273	0.05633	0.458043
TRIM29	0.171636	0.01387	0.01387	1.05046	0.14901	0.01387	0.104549	2.1046	1.52478	0.153912	5.69943
LMNA	0.26595	1.33401	0.016208	0.185822	0.016208	0.016208	0.575274	1.60865	1.12773	0.016208	5.83773
CS	0.343345	0.900319	0.056883	0.056883	0.056883	0.056883	2.70149	0.736158	0.842536	0.056883	5.19174
NPC2	0.02506	0.894644	0.02506	0.448913	0.02506	0.02506	3.34417	4.95821	0.373935	0.02506	0.854837
YWHAB	0.658405	1.45519	1.02045	0.08005	0.08005	0.08005	3.38138	4.00428	0.08005	0.08005	0.08005
PHB2	0.310719	0.031841	0.031841	1.02096	0.031841	0.600537	1.82698	4.38387	1.3013	0.031841	1.42827
KRT38	0.254472	1.16354	0.106172	0.333305	0.896525	0.078015	7.21485	0.178333	0.380952	0.231586	0.162255
KRT75	0.00097	0.547299	0.418164	0.00097	0.00097	1.15496	0.00097	0.117415	2.65217	0.049009	6.0571
PKP1	0.8421	0.060589	0.908869	0.743351	0.180928	0.004266	0.501329	2.34784	1.87634	0.198154	3.33624
CRIP2	1.60943	0.122578	1.06488	0.122578	0.122578	0.122578	0.122578	4.57547	0.122578	0.122578	2.89218
HSPB1	0.042267	0.042267	2.19755	0.738579	0.042267	0.042267	0.042267	0.042267	3.01779	0.042267	4.75022
PKP3	1.05269	0.071886	0.071886	1.15942	0.071886	0.071886	0.071886	2.30495	1.88462	0.071886	4.16702
MUC16	0.842296	0.065577	0.065577	1.18737	1.07106	0.065577	0.065577	0.065577	1.77475	0.799193	4.99744
KRT33B	0.221224	0.017431	1.00166	0.821299	0.045287	1.61722	0.891855	0.266743	1.78909	0.525979	3.8022
KRT16	2.29767	0.015615	1.21136	0.602144	0.355888	0.015615	0.015615	3.66678	0.317304	0.015615	2.48639
KRTAP4-9	0.113243	0.142033	1.21453	0.933949	0.215407	1.66343	0.080465	1.34717	1.7152	1.40264	2.17192
TUBB2A;TUBB2B	0.521268	0.843696	0.723361	0.829804	0.930137	0.454128	0.958565	1.22728	1.90182	0.747544	1.8624
KRT85	0.623011	0.9313	0.884832	1.40919	0.129612	0.342218	0.2817	3.01206	0.898752	0.883407	1.60392
KRT80	0.608172	1.05756	0.017576	0.974562	0.590551	1.22588	0.017576	2.65487	1.06327	1.11464	1.67535
KRT36	0.360746	0.023956	0.32774	1.11274	1.38444	1.2705	0.023956	1.45672	1.15461	2.70439	1.1802
HSD17B10	0.801485	0.028833	0.028833	0.028833	0.028833	2.10722	0.028833	0.976337	4.40691	0.028833	2.53505
KRT7	0.004192	0.004192	0.004192	0.426296	0.004192	3.52649	0.004192	0.004192	2.48261	0.004192	4.53526
HSP90AA1	0.098754	1.1592	0.098754	1.16827	0.098754	0.098754	1.41681	1.49349	2.42517	0.098754	2.84328
KRT10	0.211529	0.000828	0.100729	0.761627	0.096547	2.82996	0.030287	0.720583	3.1298	0.234677	2.88343
KRT5	0.607651	0.014387	0.184597	2.06768	1.88581	0.014387	0.014387	1.7926	1.24636	0.014387	3.15775
PLP2	0.944369	1.19243	1.39843	0.56725	0.479535	0.194115	1.7275	2.54167	0.49223	0.777384	0.685082
	0.365346	0.562144	0.332993	1.61576	1.41889	0.007936	0.248817	1.33747	1.95794	1.64296	1.50975
LAP3	0.296276	0.016946	0.016946	0.016946	0.016946	2.97073	0.016946	0.629393	2.31242	0.016946	4.68951
KRTAP2-2;KRTAP2-1	0.195521	1.4247	0.171381	1.08857	0.541894	1.36858	0.255167	0.814397	0.814338	1.18913	3.13631
KRT35	0.270974	0.571498	1.06169	2.59226	0.124684	0.183334	0.084345	1.60453	2.20543	0.286311	2.01495
CFL1	0.107255	0.864293	0.177188	0.612469	0.822403	2.24467	0.722696	2.02014	0.692814	1.72166	1.01441
SLC25A11	0.918486	0.627545	1.04878	0.870553	0.849717	0.071806	3.14417	2.43012	0.350658	0.496727	0.191443
z							0	0	0.352219	0	4.64778
RTN3							1.12725	3.57825	0	0	0.294496
TPI1							0	0.519748	0.169365	0	4.31089
ATP5A1							0	0.789039	0.943998	0	3.26696
S100A3							0	0	1.78631	0	3.21369
DUSP14							0	0	2.76259	0	2.23741
LDHB							0	0.410552	0.314522	0	4.27493
MDH2							0.301111	2.28317	0.162825	0	2.2529
BLMH							0	0	0.581771	0	4.41823
LYG2							0	2.71182	0.586045	0	1.70214
HSPD1							0	0.402849	1.22059	0	3.37656
SERPINB5							0	0	2.44747	0	2.55253
GSTP1							0	0	2.08456	0	2.91544
GPNMB							0	2.80345	0	0	2.19655
S100A6							0	0	1.57205	0	3.42795
H2AFJ;HIST1H2AG;HIST1H2AH;HIST1H2AJ;HIST2H2AA3;HIST1H2AD;HIST1H2AC;HIST2H2AC;HIST3H2A;HIST1H2AB							0	0	1.86195	0	3.13805
HSPA8							0	2.91219	0.746177	0	1.34163
PFN1							0	0	1.84882	0	3.15118
EEF1A1;EEF1A1P5;EEF1A2							0	0	1.70772	0	3.29228
PGK1							0	1.3384	0.778214	0.233515	2.64987
KRTAP24-1							0	0	2.71653	0	2.28347
CSTB							0	3.76061	0	0	1.23939
LAMP1							0	2.2826	2.21934	0	0.498058
KRT82							3.49716	0	0	0	1.50284
HADHA							0	0	1.23665	0	3.76335
HSPA5							0	0	1.15047	0	3.84953
PKM							0	0	1.38558	0	3.61442
EIF4A1;EIF4A2							0	0	2.83999	0	2.16001
PRDX6							0	0	2.59149	0	2.40851
GDPD3							0	0	0.780291	0	4.21971
LDHA							0	1.70962	0	0	3.29038
PSMA3							0	4.50481	0	0	0.495188
							0	1.80926	1.53286	0	1.65788
PLCD1							0	0.729026	1.94886	0	2.32212
HIST1H1B							0.375058	0	1.02644	0	3.5985
CTNNB1							0	0.499471	0	0	4.50053
YWHAZ							0	2.98859	0	0	2.01141
GGH							0	0	0.691798	0	4.3082
AIM1							0	0	1.60809	0	3.39191
H2AFY							0	0	1.35323	0	3.64677
PLEC							0	0	3.36247	0	1.63753
YPEL5							0	3.11993	0	0	1.88007
S100A16							0	2.65441	0	0	2.34559
CDH1							0	0	2.38711	0	2.61289
PHB							0	0	1.75143	0	3.24857
EEF2							0	0	1.78786	0	3.21214
FKBP1A							0	2.89404	0	0	2.10596
HEXB							0	0	3.18951	0	1.81049
GGCT							0	2.99758	0	0	2.00242
DSC2							0	3.82232	0	0	1.17768
HSD17B4							0	0	2.50083	0	2.49917
ANXA1							0	0	0.714374	0	4.28563
YWHAQ							0	1.78926	0.783256	0	2.42748
RPLP0;RPLP0P6							0	3.06936	0	0	1.93064
GJA1							0	1.688	1.3644	0	1.9476
HADHB							3.17458	0	0	0	1.82542
YWHAG							0	0	1.85664	0	3.14336
KRTAP16-1							0	0	3.02821	0	1.97179
ALDOA							0	0	1.67805	0	3.32195
ECH1							4.29099	0	0	0	0.709014
HSPE1							0	0	1.74836	0	3.25164
CAT							0	0	1.8874	0	3.1126
GDI2							0	0	2.86295	0	2.13705
RPS13							0	0	1.76316	1.53128	1.70556
SEC24C							0	3.85512	1.14488	0	0
RAB21							0	0	2.3722	2.6278	0
ACAT2							0	0	2.46255	1.97322	0.564237
GAN							0	3.27494	1.72506	0	0
CDSN							0	0	1.80301	0	3.19699
BCAP31							0	0	3.50665	0	1.49335
TOMM40							0	0	2.66303	0	2.33697
KRT4							0	1.95114	0	0	3.04886
TKT							0	0	2.01091	0	2.98909

## Sheet: B
	Log 2 fold difference (White/Dark)	Mitochondrial: -Log10 P value	Lysosomal: -Log10 P value	All other: -Log10 P value
SELENBP1	4.14395			0.604106
VDAC1	3.89539	0.840285
	3.44646			0.585722
ANXA2;ANXA2P2	3.35245			0.55312
HEPHL1	3.1371			0.781848
SFN	3.10659			1.13557
UBA52;RPS27A;UBB;UBC	2.88231			0.290502
SOD1	2.54939	0.866944
DSP	2.5181			1.65382
HSPA2	2.4808			0.941532
KRT14	2.47596			0.97045
JUP	2.40812			0.720767
ACTB;ACTG1	2.3648			1.07933
TGM3	2.30509			0.97019
DSG4	2.27351			0.63237
KRT31	2.12303			0.603968
DSG3	2.08874			0.422946
TRIM29	2.06881			0.480705
LMNA	1.94208			0.526453
CS	1.92906	0.481831
NPC2	1.82659		0.454807
YWHAB	1.82166			2.22636
PHB2	1.79505	0.890519
KRT38	1.79118			0.412877
KRT75	1.65047			0.386382
PKP1	1.59414			0.968272
CRIP2	1.48149			0.945004
HSPB1	1.40363			0.77857
PKP3	1.33253			0.793395
MUC16	1.28795			0.513469
KRT33B	1.22925			0.640766
KRT16	0.949582			0.479658
KRTAP4-9	0.91245			0.749478
TUBB2A;TUBB2B	0.901539			1.63149
KRT85	0.89176			0.65165
KRT80	0.868185			1.11519
KRT36	0.86566			0.924566
HSD17B10	0.859851	0.346258
KRT7	0.828163			0.304166
HSP90AA1	0.813117			0.769945
KRT10	0.80696			0.301949
KRT5	0.799908	0.550974
PLP2	0.645003			0.524278
	0.640796			0.579556
LAP3	0.639001	0.186408
KRTAP2-2;KRTAP2-1	0.637254			0.38393
KRT35	0.6299			0.326299
CFL1	0.617196			0.469197
SLC25A11	0.615941	0.322682
CALML3	0.529543			1.06848
APOD	0.507189			0.463375
KRT39	0.505863			0.360889
KRTAP13-2	0.447367			0.224347
KRTAP3-2	0.428682			0.181263
KRT86	0.427032			0.395039
KRTAP9-9;KRTAP9-8	0.426114			0.407919
ARF1;ARF3;ARF5;ARF4	0.416485			0.225204
KRTAP3-3	0.408905			0.291649
KRTAP4-6	0.368314			0.366539
SERPINA3	0.290336			0.093966
PPIA	0.279213			0.142706
GAA	0.273654		0.088295
KRTAP4-2	0.251756			0.150215
KRTAP4-4	0.218519			0.115185
APOE	0.196073			0.079415
KRT33A	0.190475			0.149973
GSDMA	0.179841			0.121547
LMNB1	0.13386			0.046746
LGALS3	0.087427			0.02282
HNRNPA1	0.064224			0.031251
DSTN	0.016206			0.006379
RAN	-0.02628			0.01189
KRTAP10-10	-0.03786			0.012104
KRT1	-0.07243			0.044354
LY6G6D	-0.10045			0.055399
KRTAP2-4;KRTAP2-3	-0.13891			0.059258
KRTAP10-12	-0.16224			0.048637
VDAC2	-0.19672	0.057796
KRT81	-0.2335			0.105539
TXN	-0.30539			0.092169
KRTAP4-7	-0.31254			0.4589
ITIH4	-0.3367			0.159851
SERPINF2	-0.34656			0.205539
KRT2	-0.37059			0.308308
C3	-0.43924			0.279782
CALML5	-0.45761			0.210322
APOH	-0.46718			0.333045
ATP5B	-0.48308	0.189151
GSN	-0.49711			0.423304
HIST1H2BL;HIST1H2BM;HIST1H2BN;HIST1H2BH;HIST2H2BF;HIST1H2BC;HIST1H2BD;H2BFS;HIST1H2BK;HIST1H2BA	-0.52859			0.156363
AHSG	-0.53346			0.401415
KRT9	-0.54886			0.5052
APOA4	-0.59046			0.368638
KNG1	-0.60141			0.417315
IGKC	-0.60319			0.583002
KRTAP9-2	-0.61766			0.33679
APOA1	-0.62453			0.24206
C4A;C4B	-0.64086			0.271412
SACM1L	-0.6547			0.353462
SERPINC1	-0.66925			0.17389
APOC3	-0.68913			0.437852
KRT6C	-0.70633			0.472611
AMBP	-0.70976			0.585973
HPX	-0.73366			0.376978
FLG2	-0.7559			0.203751
GC	-0.75923		0.597742
ALB	-0.77141			0.477835
SERPING1	-0.7938			0.437889
AFM	-0.81429			0.468301
AZGP1	-0.84533			0.653272
ITIH2	-0.88805			0.759618
CFB	-0.90416			0.723975
KRTAP4-3	-0.91319			0.278001
SLC25A5	-0.9161	0.385061
	-0.9239			0.907441
DSG1	-0.99032			0.332951
CLU	-1.09369		0.852939
CP	-1.1237		0.657627
	-1.16521			0.989738
GPRC5D	-1.1857			0.505365
APOB	-1.28729			0.607885
KRTAP9-1	-1.40175			0.464958
DCD	-1.47027			0.653405
IGHA1	-1.49125			0.579498
HRNR	-1.66188			0.776047
KRTAP10-6	-1.82978			0.828104
KRTAP3-1	-1.90667			0.595344
KRTAP10-9	-2.13616			0.762567
KRTAP13-1	-2.33091			0.417156
KRTAP1-1	-2.43284			0.550877
MIF	-2.52102			0.50054
OFD1	-6.4155			0.383181
