# Supplementary material for: Quantitative mapping of human hair greying and reversal in relation to life stress
Source: eLife. 2021 Jun 22;10:e67437. doi: 10.7554/eLife.67437 (PMC8219384; doi:10.7554/eLife.67437)
Supplement: Figure 1—figure supplement 4—source data 1. [file elife-67437-fig1-figsupp4-data1.xlsx]

## Sheet: A
PLS-DA
	Comp 1	Comp 2
D1	-19	-1
D2	-15	1
D3	-5	-9
D4	-22	-0.5
D5	-4.5	-19
D6	-14	-6
W1	-5	24
W2	20	7.5
W3	25	-3
W4	1	10
W5	39	-5

## Sheet: C
top 50 VIP Scores- Comp. 1
FABP4	3.1074
HIST1H4A	2.3388
VDAC1	2.227
unknown 2	2.2055
MDH2	2.184
ATP5A1	2.0765
RTN3	2.0003
VDAC2	1.9998
UBA52RPS27AUBBUBC	1.9704
DSG4	1.9581
PGK1	1.9198
HIST2H3AHIST3H3H3F3AHIST1H3AH3F3C	1.8947
LYG2	1.8869
TPI1	1.8357
HSPD1	1.7789
SFN	1.7492
ANXA2ANXA2P2	1.7385
HSPA8	1.7176
LDHB	1.7171
TRIM29	1.7146
ATP5B	1.6957
KRTAP10-6	1.6569
LAMP1	1.5907
SELENBP1	1.5452
KRT31	1.5435
NDUFS1	1.5332
unknown 4	1.5299
NPC2	1.5146
ENO1	1.4683
unknown 3	1.453
unknown 1	1.4168
LMNA	1.4087
NEU2	1.3875
HEPHL1	1.381
PLCD1	1.3656
KIF4AKIF4B	1.3575
CS	1.3499
KRTAP4-4	1.3326
KRTAP1-5	1.3009
ATP5C1	1.2969
TGM3	1.2762
PHB2	1.2707
PKP1	1.2578
KRT75	1.2546
LGALS7	1.2545
HIST1H1B	1.2424
LMNB2	1.2313
ACOT7	1.2251
DSG3	1.2101
unknown 8	1.1911
SOD1	1.1904
