# Supplementary material for: Quantitative mapping of human hair greying and reversal in relation to life stress
Source: eLife. 2021 Jun 22;10:e67437. doi: 10.7554/eLife.67437 (PMC8219384; doi:10.7554/eLife.67437)
Supplement: Figure 1—source data 1. [file elife-67437-fig1-data1.xlsx]

## Sheet: 1C
Note: Hairs were scanned from root (0 cm) to tip, but are graphed from tip (as 0 cm) to root. Therefore, all hairs are reversed when graphed.
Dark Hair (Top)			White Hair (Middle)			Greying Hair (Bottom)
Distance (cm)	Intensity (A.U.)		Distance (cm)	Intensity (A.U.)		Distance (cm)	Intensity (A.U.)
0	176.37		0	30.4737		0	21.77
0.0008	176.32		0.0008	30.4615		0.0008	21.71
0.0016	176.27		0.00159	30.45		0.0016	21.66
0.0024	176.21		0.00239	30.4878		0.0024	21.62
0.0032	176.13		0.00319	30.5476		0.0032	21.6
0.004	176.04		0.00398	30.6279		0.004	21.58
0.0048	175.94		0.00478	30.7273		0.0048	21.53
0.0056	175.86		0.00558	30.8222		0.0056	21.47
0.0064	175.8		0.00637	30.8913		0.0064	21.41
0.0072	175.76		0.00717	30.9362		0.0072	21.36
0.008	175.73		0.00797	30.9583		0.008	21.32
0.0088	175.7		0.00876	30.9592		0.0088	21.29
0.0096	175.66		0.00956	30.96		0.0096	21.26
0.0104	175.63		0.01036	30.9412		0.0104	21.21
0.0112	175.6		0.01115	30.9231		0.0112	21.15
0.012	175.56		0.01195	30.9057		0.012	21.08
0.0127	175.51		0.01275	30.8704		0.0127	21
0.0135	175.45		0.01354	30.8545		0.0135	20.93
0.0143	175.39		0.01434	30.8393		0.0143	20.84
0.0151	175.34		0.01514	30.8246		0.0151	20.75
0.0159	175.3		0.01593	30.8103		0.0159	20.66
0.0167	175.26		0.01673	30.7797		0.0167	20.56
0.0175	175.23		0.01753	30.75		0.0175	20.47
0.0183	175.19		0.01832	30.7049		0.0183	20.39
0.0191	175.15		0.01912	30.6613		0.0191	20.32
0.0199	175.12		0.01992	30.619		0.0199	20.26
0.0207	175.1		0.02071	30.5781		0.0207	20.19
0.0215	175.08		0.02151	30.5538		0.0215	20.11
0.0223	175.06		0.02231	30.5303		0.0223	20.03
0.0231	175.04		0.0231	30.5224		0.0231	19.95
0.0239	175		0.0239	30.5147		0.0239	19.88
0.0247	174.94		0.0247	30.5072		0.0247	19.8
0.0255	174.86		0.02549	30.5		0.0255	19.71
0.0263	174.77		0.02629	30.4789		0.0263	19.62
0.0271	174.68		0.02709	30.4722		0.0271	19.52
0.0279	174.58		0.02788	30.4658		0.0279	19.42
0.0287	174.47		0.02868	30.4595		0.0287	19.33
0.0295	174.36		0.02948	30.4533		0.0295	19.24
0.0303	174.26		0.03027	30.4474		0.0303	19.14
0.0311	174.16		0.03107	30.4416		0.0311	19.04
0.0319	174.08		0.03187	30.4359		0.0319	18.93
0.0327	174.02		0.03266	30.4304		0.0327	18.82
0.0335	173.96		0.03346	30.425		0.0335	18.72
0.0343	173.9		0.03426	30.4321		0.0343	18.63
0.0351	173.82		0.03505	30.439		0.0351	18.56
0.0359	173.73		0.03585	30.4458		0.0359	18.49
0.0366	173.65		0.03665	30.4524		0.0366	18.41
0.0374	173.57		0.03744	30.4588		0.0374	18.34
0.0382	173.51		0.03824	30.4651		0.0382	18.27
0.039	173.48		0.03904	30.4598		0.039	18.22
0.0398	173.43		0.03983	30.4545		0.0398	18.2
0.0406	173.37		0.04063	30.4607		0.0406	18.21
0.0414	173.3		0.04143	30.4667		0.0414	18.23
0.0422	173.21		0.04222	30.4725		0.0422	18.25
0.043	173.13		0.04302	30.4674		0.043	18.27
0.0438	173.08		0.04382	30.4731		0.0438	18.3
0.0446	173.03		0.04461	30.4787		0.0446	18.33
0.0454	173		0.04541	30.4947		0.0454	18.38
0.0462	172.97		0.04621	30.5104		0.0462	18.45
0.047	172.92		0.047	30.5258		0.047	18.52
0.0478	172.87		0.0478	30.5408		0.0478	18.6
0.0486	172.82		0.0486	30.5455		0.0486	18.69
0.0494	172.77		0.04939	30.55		0.0494	18.78
0.0502	172.71		0.05019	30.55		0.0502	18.87
0.051	172.63		0.05099	30.55		0.051	18.95
0.0518	172.54		0.05178	30.54		0.0518	19.03
0.0526	172.46		0.05258	30.53		0.0526	19.1
0.0534	172.39		0.05338	30.53		0.0534	19.16
0.0542	172.33		0.05417	30.53		0.0542	19.22
0.055	172.29		0.05497	30.53		0.055	19.27
0.0558	172.24		0.05577	30.53		0.0558	19.33
0.0566	172.2		0.05656	30.52		0.0566	19.38
0.0574	172.15		0.05736	30.51		0.0574	19.42
0.0582	172.09		0.05816	30.49		0.0582	19.46
0.059	172.03		0.05895	30.47		0.059	19.51
0.0598	171.97		0.05975	30.45		0.0598	19.56
0.0605	171.92		0.06055	30.43		0.0605	19.6
0.0613	171.88		0.06134	30.4		0.0613	19.65
0.0621	171.88		0.06214	30.38		0.0621	19.7
0.0629	171.9		0.06294	30.36		0.0629	19.74
0.0637	171.94		0.06373	30.33		0.0637	19.78
0.0645	171.97		0.06453	30.3		0.0645	19.82
0.0653	171.99		0.06533	30.26		0.0653	19.85
0.0661	172		0.06612	30.22		0.0661	19.88
0.0669	172		0.06692	30.18		0.0669	19.92
0.0677	171.99		0.06772	30.13		0.0677	19.94
0.0685	171.96		0.06851	30.08		0.0685	19.95
0.0693	171.9		0.06931	30.03		0.0693	19.93
0.0701	171.81		0.07011	29.99		0.0701	19.9
0.0709	171.71		0.07091	29.95		0.0709	19.87
0.0717	171.6		0.0717	29.91		0.0717	19.85
0.0725	171.51		0.0725	29.86		0.0725	19.84
0.0733	171.44		0.0733	29.82		0.0733	19.83
0.0741	171.39		0.07409	29.78		0.0741	19.82
0.0749	171.36		0.07489	29.74		0.0749	19.82
0.0757	171.34		0.07569	29.71		0.0757	19.82
0.0765	171.33		0.07648	29.68		0.0765	19.81
0.0773	171.31		0.07728	29.66		0.0773	19.78
0.0781	171.29		0.07808	29.64		0.0781	19.73
0.0789	171.27		0.07887	29.62		0.0789	19.68
0.0797	171.25		0.07967	29.6		0.0797	19.63
0.0805	171.24		0.08047	29.58		0.0805	19.6
0.0813	171.23		0.08126	29.56		0.0813	19.57
0.0821	171.22		0.08206	29.51		0.0821	19.52
0.0829	171.22		0.08286	29.45		0.0829	19.46
0.0837	171.21		0.08365	29.38		0.0837	19.39
0.0844	171.19		0.08445	29.31		0.0844	19.34
0.0852	171.18		0.08525	29.24		0.0852	19.3
0.086	171.17		0.08604	29.18		0.086	19.25
0.0868	171.16		0.08684	29.13		0.0868	19.2
0.0876	171.16		0.08764	29.1		0.0876	19.15
0.0884	171.16		0.08843	29.08		0.0884	19.08
0.0892	171.19		0.08923	29.06		0.0892	19
0.09	171.22		0.09003	29.05		0.09	18.92
0.0908	171.23		0.09082	29.04		0.0908	18.85
0.0916	171.24		0.09162	29.03		0.0916	18.79
0.0924	171.24		0.09242	29.03		0.0924	18.75
0.0932	171.23		0.09321	29.01		0.0932	18.71
0.094	171.21		0.09401	29		0.094	18.7
0.0948	171.18		0.09481	28.99		0.0948	18.7
0.0956	171.15		0.0956	28.97		0.0956	18.72
0.0964	171.12		0.0964	28.96		0.0964	18.76
0.0972	171.11		0.0972	28.94		0.0972	18.81
0.098	171.11		0.09799	28.92		0.098	18.86
0.0988	171.12		0.09879	28.9		0.0988	18.91
0.0996	171.14		0.09959	28.87		0.0996	18.94
0.1004	171.17		0.10038	28.85		0.1004	18.96
0.1012	171.2		0.10118	28.82		0.1012	18.99
0.102	171.25		0.10198	28.79		0.102	19.03
0.1028	171.28		0.10277	28.75		0.1028	19.06
0.1036	171.32		0.10357	28.72		0.1036	19.08
0.1044	171.35		0.10437	28.69		0.1044	19.1
0.1052	171.38		0.10516	28.67		0.1052	19.13
0.106	171.41		0.10596	28.67		0.106	19.17
0.1068	171.42		0.10676	28.67		0.1068	19.21
0.1076	171.43		0.10755	28.67		0.1076	19.26
0.1083	171.43		0.10835	28.67		0.1083	19.31
0.1091	171.41		0.10915	28.67		0.1091	19.35
0.1099	171.4		0.10994	28.67		0.1099	19.38
0.1107	171.4		0.11074	28.67		0.1107	19.41
0.1115	171.41		0.11154	28.67		0.1115	19.45
0.1123	171.42		0.11233	28.67		0.1123	19.49
0.1131	171.43		0.11313	28.67		0.1131	19.52
0.1139	171.42		0.11393	28.67		0.1139	19.55
0.1147	171.43		0.11472	28.66		0.1147	19.57
0.1155	171.44		0.11552	28.65		0.1155	19.59
0.1163	171.44		0.11632	28.64		0.1163	19.61
0.1171	171.42		0.11711	28.64		0.1171	19.62
0.1179	171.37		0.11791	28.64		0.1179	19.63
0.1187	171.29		0.11871	28.64		0.1187	19.63
0.1195	171.2		0.1195	28.64		0.1195	19.61
0.1203	171.12		0.1203	28.62		0.1203	19.56
0.1211	171.07		0.1211	28.6		0.1211	19.49
0.1219	171.05		0.12189	28.58		0.1219	19.41
0.1227	171.01		0.12269	28.56		0.1227	19.32
0.1235	170.93		0.12349	28.53		0.1235	19.21
0.1243	170.86		0.12428	28.5		0.1243	19.09
0.1251	170.78		0.12508	28.47		0.1251	18.96
0.1259	170.7		0.12588	28.44		0.1259	18.82
0.1267	170.63		0.12667	28.4		0.1267	18.68
0.1275	170.57		0.12747	28.36		0.1275	18.54
0.1283	170.52		0.12827	28.34		0.1283	18.4
0.1291	170.48		0.12906	28.32		0.1291	18.26
0.1299	170.47		0.12986	28.3		0.1299	18.13
0.1307	170.49		0.13066	28.28		0.1307	18.02
0.1315	170.54		0.13145	28.27		0.1315	17.91
0.1322	170.6		0.13225	28.26		0.1322	17.81
0.133	170.63		0.13305	28.25		0.133	17.71
0.1338	170.65		0.13384	28.24		0.1338	17.61
0.1346	170.64		0.13464	28.23		0.1346	17.5
0.1354	170.63		0.13544	28.21		0.1354	17.38
0.1362	170.6		0.13623	28.2		0.1362	17.25
0.137	170.59		0.13703	28.19		0.137	17.11
0.1378	170.58		0.13783	28.18		0.1378	16.95
0.1386	170.56		0.13862	28.17		0.1386	16.79
0.1394	170.52		0.13942	28.17		0.1394	16.63
0.1402	170.49		0.14022	28.17		0.1402	16.47
0.141	170.47		0.14101	28.18		0.141	16.3
0.1418	170.44		0.14181	28.19		0.1418	16.13
0.1426	170.39		0.14261	28.19		0.1426	15.98
0.1434	170.31		0.1434	28.2		0.1434	15.83
0.1442	170.22		0.1442	28.21		0.1442	15.68
0.145	170.12		0.145	28.24		0.145	15.54
0.1458	170.02		0.14579	28.27		0.1458	15.41
0.1466	169.93		0.14659	28.3		0.1466	15.29
0.1474	169.87		0.14739	28.33		0.1474	15.18
0.1482	169.83		0.14818	28.36		0.1482	15.07
0.149	169.82		0.14898	28.39		0.149	14.98
0.1498	169.84		0.14978	28.42		0.1498	14.9
0.1506	169.87		0.15057	28.45		0.1506	14.82
0.1514	169.9		0.15137	28.48		0.1514	14.72
0.1522	169.9		0.15217	28.52		0.1522	14.62
0.153	169.89		0.15296	28.55		0.153	14.53
0.1538	169.84		0.15376	28.58		0.1538	14.44
0.1546	169.77		0.15456	28.6		0.1546	14.35
0.1554	169.7		0.15535	28.61		0.1554	14.26
0.1562	169.61		0.15615	28.62		0.1562	14.19
0.1569	169.54		0.15695	28.63		0.1569	14.15
0.1577	169.47		0.15774	28.63		0.1577	14.15
0.1585	169.41		0.15854	28.63		0.1585	14.18
0.1593	169.33		0.15934	28.63		0.1593	14.25
0.1601	169.23		0.16013	28.63		0.1601	14.34
0.1609	169.12		0.16093	28.63		0.1609	14.44
0.1617	169.02		0.16173	28.65		0.1617	14.55
0.1625	168.94		0.16252	28.67		0.1625	14.66
0.1633	168.88		0.16332	28.7		0.1633	14.75
0.1641	168.83		0.16412	28.73		0.1641	14.83
0.1649	168.76		0.16491	28.76		0.1649	14.9
0.1657	168.68		0.16571	28.79		0.1657	14.96
0.1665	168.61		0.16651	28.82		0.1665	15.01
0.1673	168.53		0.1673	28.83		0.1673	15.07
0.1681	168.45		0.1681	28.84		0.1681	15.14
0.1689	168.35		0.1689	28.85		0.1689	15.21
0.1697	168.23		0.16969	28.87		0.1697	15.3
0.1705	168.11		0.17049	28.89		0.1705	15.38
0.1713	167.99		0.17129	28.91		0.1713	15.44
0.1721	167.89		0.17208	28.93		0.1721	15.49
0.1729	167.8		0.17288	28.96		0.1729	15.55
0.1737	167.72		0.17368	28.98		0.1737	15.61
0.1745	167.64		0.17447	29		0.1745	15.66
0.1753	167.56		0.17527	29.02		0.1753	15.72
0.1761	167.48		0.17607	29.04		0.1761	15.76
0.1769	167.39		0.17686	29.07		0.1769	15.78
0.1777	167.31		0.17766	29.1		0.1777	15.78
0.1785	167.22		0.17846	29.13		0.1785	15.75
0.1793	167.11		0.17925	29.17		0.1793	15.73
0.1801	167.01		0.18005	29.2		0.1801	15.71
0.1808	166.92		0.18085	29.23		0.1808	15.68
0.1816	166.83		0.18164	29.26		0.1816	15.65
0.1824	166.76		0.18244	29.29		0.1824	15.63
0.1832	166.69		0.18324	29.3		0.1832	15.62
0.184	166.62		0.18403	29.32		0.184	15.62
0.1848	166.55		0.18483	29.32		0.1848	15.64
0.1856	166.47		0.18563	29.29		0.1856	15.68
0.1864	166.41		0.18642	29.25		0.1864	15.72
0.1872	166.31		0.18722	29.21		0.1872	15.76
0.188	166.14		0.18802	29.17		0.188	15.81
0.1888	165.98		0.18881	29.13		0.1888	15.86
0.1896	165.82		0.18961	29.09		0.1896	15.92
0.1904	165.65		0.19041	29.05		0.1904	15.97
0.1912	165.47		0.1912	29.02		0.1912	16
0.192	165.15		0.192	28.99		0.192	16
0.1928	164.84		0.1928	28.96		0.1928	16
0.1936	164.55		0.19359	28.92		0.1936	16
0.1944	164.26		0.19439	28.89		0.1944	16
0.1952	163.99		0.19519	28.86		0.1952	16.01
0.196	163.73		0.19598	28.83		0.196	16.02
0.1968	163.5		0.19678	28.79		0.1968	16.02
0.1976	163.28		0.19758	28.75		0.1976	16.02
0.1984	163.06		0.19837	28.73		0.1984	16.03
0.1992	162.85		0.19917	28.71		0.1992	16.06
0.2	162.63		0.19997	28.7		0.2	16.11
0.2008	162.38		0.20076	28.69		0.2008	16.18
0.2016	162.11		0.20156	28.67		0.2016	16.25
0.2024	161.85		0.20236	28.66		0.2024	16.31
0.2032	161.61		0.20315	28.65		0.2032	16.36
0.204	161.37		0.20395	28.64		0.204	16.42
0.2047	161.13		0.20475	28.62		0.2047	16.49
0.2055	160.89		0.20554	28.59		0.2055	16.58
0.2063	160.67		0.20634	28.57		0.2063	16.68
0.2071	160.43		0.20714	28.55		0.2071	16.78
0.2079	160.17		0.20793	28.52		0.2079	16.87
0.2087	159.9		0.20873	28.49		0.2087	16.95
0.2095	159.6		0.20953	28.47		0.2095	17.03
0.2103	159.29		0.21033	28.45		0.2103	17.13
0.2111	158.97		0.21112	28.43		0.2111	17.24
0.2119	158.65		0.21192	28.41		0.2119	17.36
0.2127	158.36		0.21272	28.4		0.2127	17.5
0.2135	158.08		0.21351	28.39		0.2135	17.66
0.2143	157.81		0.21431	28.39		0.2143	17.83
0.2151	157.53		0.21511	28.39		0.2151	17.99
0.2159	157.25		0.2159	28.39		0.2159	18.14
0.2167	156.96		0.2167	28.39		0.2167	18.31
0.2175	156.67		0.2175	28.38		0.2175	18.52
0.2183	156.39		0.21829	28.37		0.2183	18.74
0.2191	156.14		0.21909	28.36		0.2191	18.97
0.2199	155.87		0.21989	28.35		0.2199	19.21
0.2207	155.59		0.22068	28.34		0.2207	19.45
0.2215	155.31		0.22148	28.34		0.2215	19.7
0.2223	155.03		0.22228	28.35		0.2223	19.95
0.2231	154.76		0.22307	28.35		0.2231	20.19
0.2239	154.49		0.22387	28.35		0.2239	20.42
0.2247	154.23		0.22467	28.33		0.2247	20.64
0.2255	153.96		0.22546	28.31		0.2255	20.87
0.2263	153.69		0.22626	28.29		0.2263	21.11
0.2271	153.4		0.22706	28.27		0.2271	21.33
0.2279	153.12		0.22785	28.24		0.2279	21.54
0.2286	152.84		0.22865	28.21		0.2286	21.74
0.2294	152.57		0.22945	28.18		0.2294	21.94
0.2302	152.31		0.23024	28.15		0.2302	22.15
0.231	152.07		0.23104	28.11		0.231	22.39
0.2318	151.84		0.23184	28.06		0.2318	22.65
0.2326	151.61		0.23263	28.01		0.2326	22.9
0.2334	151.39		0.23343	27.96		0.2334	23.14
0.2342	151.16		0.23423	27.91		0.2342	23.36
0.235	150.91		0.23502	27.86		0.235	23.55
0.2358	150.68		0.23582	27.81		0.2358	23.72
0.2366	150.42		0.23662	27.77		0.2366	23.87
0.2374	150.1		0.23741	27.74		0.2374	23.98
0.2382	149.61		0.23821	27.71		0.2382	24.06
0.239	148.92		0.23901	27.69		0.239	24.09
0.2398	148.16		0.2398	27.67		0.2398	24.09
0.2406	147.4		0.2406	27.65		0.2406	24.09
0.2414	146.63		0.2414	27.63		0.2414	24.09
0.2422	145.84		0.24219	27.61		0.2422	24.09
0.243	145.13		0.24299	27.58		0.243	24.12
0.2438	144.59		0.24379	27.54		0.2438	24.15
0.2446	144.22		0.24458	27.5		0.2446	24.18
0.2454	143.91		0.24538	27.46		0.2454	24.21
0.2462	143.59		0.24618	27.42		0.2462	24.24
0.247	143.27		0.24697	27.39		0.247	24.27
0.2478	142.95		0.24777	27.37		0.2478	24.31
0.2486	142.62		0.24857	27.35		0.2486	24.36
0.2494	142.29		0.24936	27.32		0.2494	24.39
0.2502	141.97		0.25016	27.29		0.2502	24.43
0.251	141.65		0.25096	27.27		0.251	24.48
0.2518	141.33		0.25175	27.25		0.2518	24.53
0.2525	141.01		0.25255	27.23		0.2525	24.58
0.2533	140.69		0.25335	27.2		0.2533	24.63
0.2541	140.36		0.25414	27.17		0.2541	24.69
0.2549	140.01		0.25494	27.15		0.2549	24.73
0.2557	139.64		0.25574	27.13		0.2557	24.78
0.2565	139.26		0.25653	27.11		0.2565	24.84
0.2573	138.87		0.25733	27.11		0.2573	24.94
0.2581	138.48		0.25813	27.11		0.2581	25.07
0.2589	138.11		0.25892	27.12		0.2589	25.2
0.2597	137.73		0.25972	27.14		0.2597	25.35
0.2605	137.36		0.26052	27.17		0.2605	25.51
0.2613	136.98		0.26131	27.21		0.2613	25.64
0.2621	136.6		0.26211	27.25		0.2621	25.76
0.2629	136.22		0.26291	27.3		0.2629	25.86
0.2637	135.86		0.2637	27.33		0.2637	25.96
0.2645	135.51		0.2645	27.37		0.2645	26.05
0.2653	135.18		0.2653	27.41		0.2653	26.13
0.2661	134.84		0.26609	27.43		0.2661	26.22
0.2669	134.55		0.26689	27.43		0.2669	26.32
0.2677	134.35		0.26769	27.42		0.2677	26.41
0.2685	134.16		0.26848	27.41		0.2685	26.51
0.2693	133.96		0.26928	27.4		0.2693	26.61
0.2701	133.75		0.27008	27.4		0.2701	26.72
0.2709	133.54		0.27087	27.4		0.2709	26.85
0.2717	133.46		0.27167	27.4		0.2717	27.02
0.2725	133.38		0.27247	27.4		0.2725	27.21
0.2733	133.3		0.27326	27.41		0.2733	27.4
0.2741	133.22		0.27406	27.42		0.2741	27.6
0.2749	133.13		0.27486	27.42		0.2749	27.78
0.2757	133.03		0.27565	27.42		0.2757	27.95
0.2764	132.91		0.27645	27.42		0.2764	28.12
0.2772	132.8		0.27725	27.42		0.2772	28.29
0.278	132.69		0.27804	27.41		0.278	28.46
0.2788	132.58		0.27884	27.4		0.2788	28.6
0.2796	132.48		0.27964	27.39		0.2796	28.72
0.2804	132.38		0.28043	27.37		0.2804	28.81
0.2812	132.28		0.28123	27.35		0.2812	28.89
0.282	132.17		0.28203	27.33		0.282	28.97
0.2828	132.07		0.28282	27.31		0.2828	29.03
0.2836	131.96		0.28362	27.3		0.2836	29.08
0.2844	131.86		0.28442	27.29		0.2844	29.12
0.2852	131.78		0.28521	27.3		0.2852	29.16
0.286	131.69		0.28601	27.31		0.286	29.19
0.2868	131.61		0.28681	27.33		0.2868	29.23
0.2876	131.54		0.2876	27.35		0.2876	29.29
0.2884	131.47		0.2884	27.37		0.2884	29.35
0.2892	131.41		0.2892	27.37		0.2892	29.41
0.29	131.39		0.28999	27.37		0.29	29.45
0.2908	131.45		0.29079	27.36		0.2908	29.48
0.2916	131.55		0.29159	27.35		0.2916	29.5
0.2924	131.64		0.29238	27.33		0.2924	29.5
0.2932	131.71		0.29318	27.31		0.2932	29.47
0.294	131.8		0.29398	27.29		0.294	29.44
0.2948	131.99		0.29477	27.28		0.2948	29.42
0.2956	132.27		0.29557	27.28		0.2956	29.41
0.2964	132.56		0.29637	27.27		0.2964	29.39
0.2972	132.84		0.29716	27.27		0.2972	29.35
0.298	133.11		0.29796	27.27		0.298	29.29
0.2988	133.37		0.29876	27.26		0.2988	29.21
0.2996	133.63		0.29955	27.25		0.2996	29.12
0.3004	133.9		0.30035	27.23		0.3004	29.02
0.3011	134.18		0.30115	27.2		0.3011	28.93
0.3019	134.46		0.30194	27.17		0.3019	28.84
0.3027	134.73		0.30274	27.15		0.3027	28.8
0.3035	135		0.30354	27.14		0.3035	28.79
0.3043	135.26		0.30433	27.14		0.3043	28.8
0.3051	135.53		0.30513	27.14		0.3051	28.8
0.3059	135.79		0.30593	27.13		0.3059	28.76
0.3067	136.06		0.30672	27.13		0.3067	28.72
0.3075	136.31		0.30752	27.14		0.3075	28.68
0.3083	136.56		0.30832	27.15		0.3083	28.64
0.3091	136.78		0.30911	27.15		0.3091	28.63
0.3099	136.98		0.30991	27.15		0.3099	28.64
0.3107	137.17		0.31071	27.16		0.3107	28.63
0.3115	137.36		0.3115	27.17		0.3115	28.59
0.3123	137.54		0.3123	27.17		0.3123	28.54
0.3131	137.74		0.3131	27.17		0.3131	28.47
0.3139	137.96		0.31389	27.18		0.3139	28.41
0.3147	138.2		0.31469	27.19		0.3147	28.36
0.3155	138.43		0.31549	27.19		0.3155	28.3
0.3163	138.67		0.31628	27.18		0.3163	28.25
0.3171	138.96		0.31708	27.18		0.3171	28.2
0.3179	139.4		0.31788	27.18		0.3179	28.16
0.3187	140.05		0.31867	27.17		0.3187	28.13
0.3195	140.78		0.31947	27.16		0.3195	28.1
0.3203	141.5		0.32027	27.15		0.3203	28.05
0.3211	142.21		0.32106	27.14		0.3211	28.01
0.3219	142.91		0.32186	27.13		0.3219	27.97
0.3227	143.53		0.32266	27.12		0.3227	27.95
0.3235	143.99		0.32345	27.1		0.3235	27.95
0.3243	144.31		0.32425	27.08		0.3243	27.97
0.325	144.6		0.32505	27.06		0.325	28.01
0.3258	144.9		0.32584	27.04		0.3258	28.06
0.3266	145.2		0.32664	27.01		0.3266	28.1
0.3274	145.51		0.32744	26.97		0.3274	28.13
0.3282	145.82		0.32823	26.93		0.3282	28.15
0.329	146.14		0.32903	26.89		0.329	28.18
0.3298	146.45		0.32983	26.85		0.3298	28.2
0.3306	146.76		0.33062	26.8		0.3306	28.23
0.3314	147.07		0.33142	26.75		0.3314	28.27
0.3322	147.38		0.33222	26.7		0.3322	28.3
0.333	147.69		0.33301	26.66		0.333	28.31
0.3338	148.01		0.33381	26.62		0.3338	28.3
0.3346	148.35		0.33461	26.58		0.3346	28.29
0.3354	148.72		0.3354	26.53		0.3354	28.28
0.3362	149.12		0.3362	26.49		0.3362	28.28
0.337	149.53		0.337	26.44		0.337	28.27
0.3378	149.95		0.33779	26.39		0.3378	28.25
0.3386	150.36		0.33859	26.33		0.3386	28.24
0.3394	150.75		0.33939	26.26		0.3394	28.24
0.3402	151.12		0.34018	26.18		0.3402	28.24
0.341	151.48		0.34098	26.09		0.341	28.29
0.3418	151.82		0.34178	26		0.3418	28.35
0.3426	152.16		0.34257	25.9		0.3426	28.42
0.3434	152.47		0.34337	25.81		0.3434	28.47
0.3442	152.78		0.34417	25.72		0.3442	28.51
0.345	153.09		0.34496	25.65		0.345	28.53
0.3458	153.41		0.34576	25.6		0.3458	28.54
0.3466	153.74		0.34656	25.57		0.3466	28.53
0.3474	154.06		0.34736	25.55		0.3474	28.49
0.3482	154.37		0.34815	25.53		0.3482	28.44
0.3489	154.66		0.34895	25.51		0.3489	28.39
0.3497	154.94		0.34975	25.49		0.3497	28.34
0.3505	155.22		0.35054	25.46		0.3505	28.28
0.3513	155.51		0.35134	25.43		0.3513	28.19
0.3521	155.81		0.35214	25.41		0.3521	28.08
0.3529	156.12		0.35293	25.38		0.3529	27.95
0.3537	156.43		0.35373	25.36		0.3537	27.79
0.3545	156.75		0.35453	25.35		0.3545	27.63
0.3553	157.09		0.35532	25.34		0.3553	27.48
0.3561	157.45		0.35612	25.32		0.3561	27.34
0.3569	157.81		0.35692	25.3		0.3569	27.2
0.3577	158.16		0.35771	25.28		0.3577	27.05
0.3585	158.49		0.35851	25.26		0.3585	26.91
0.3593	158.79		0.35931	25.24		0.3593	26.78
0.3601	159.07		0.3601	25.22		0.3601	26.66
0.3609	159.35		0.3609	25.21		0.3609	26.55
0.3617	159.65		0.3617	25.2		0.3617	26.44
0.3625	159.94		0.36249	25.19		0.3625	26.36
0.3633	160.24		0.36329	25.17		0.3633	26.28
0.3641	160.53		0.36409	25.15		0.3641	26.2
0.3649	160.81		0.36488	25.13		0.3649	26.1
0.3657	161.08		0.36568	25.11		0.3657	26.01
0.3665	161.37		0.36648	25.08		0.3665	25.92
0.3673	161.68		0.36727	25.05		0.3673	25.84
0.3681	162		0.36807	25.01		0.3681	25.79
0.3689	162.31		0.36887	24.98		0.3689	25.75
0.3697	162.58		0.36966	24.95		0.3697	25.71
0.3705	162.78		0.37046	24.93		0.3705	25.66
0.3713	162.93		0.37126	24.91		0.3713	25.59
0.3721	163.08		0.37205	24.89		0.3721	25.5
0.3728	163.23		0.37285	24.87		0.3728	25.41
0.3736	163.36		0.37365	24.85		0.3736	25.32
0.3744	163.41		0.37444	24.83		0.3744	25.22
0.3752	163.39		0.37524	24.8		0.3752	25.12
0.376	163.36		0.37604	24.78		0.376	25.01
0.3768	163.35		0.37683	24.76		0.3768	24.89
0.3776	163.33		0.37763	24.75		0.3776	24.78
0.3784	163.31		0.37843	24.74		0.3784	24.68
0.3792	163.29		0.37922	24.73		0.3792	24.58
0.38	163.26		0.38002	24.73		0.38	24.5
0.3808	163.21		0.38082	24.73		0.3808	24.4
0.3816	163.16		0.38161	24.74		0.3816	24.29
0.3824	163.1		0.38241	24.76		0.3824	24.14
0.3832	163.03		0.38321	24.77		0.3832	23.97
0.384	162.97		0.384	24.78		0.384	23.78
0.3848	162.92		0.3848	24.78		0.3848	23.59
0.3856	162.88		0.3856	24.79		0.3856	23.43
0.3864	162.84		0.38639	24.79		0.3864	23.29
0.3872	162.81		0.38719	24.8		0.3872	23.16
0.388	162.77		0.38799	24.82		0.388	23.03
0.3888	162.74		0.38878	24.85		0.3888	22.86
0.3896	162.74		0.38958	24.89		0.3896	22.65
0.3904	162.74		0.39038	24.94		0.3904	22.44
0.3912	162.74		0.39117	24.98		0.3912	22.24
0.392	162.75		0.39197	25.02		0.392	22.06
0.3928	162.74		0.39277	25.05		0.3928	21.91
0.3936	162.72		0.39356	25.07		0.3936	21.77
0.3944	162.69		0.39436	25.08		0.3944	21.65
0.3952	162.66		0.39516	25.09		0.3952	21.55
0.396	162.64		0.39595	25.1		0.396	21.45
0.3967	162.63		0.39675	25.1		0.3967	21.36
0.3975	162.62		0.39755	25.1		0.3975	21.27
0.3983	162.61		0.39834	25.1		0.3983	21.2
0.3991	162.61		0.39914	25.1		0.3991	21.14
0.3999	162.64		0.39994	25.1		0.3999	21.11
0.4007	162.68		0.40073	25.09		0.4007	21.07
0.4015	162.71		0.40153	25.08		0.4015	21.02
0.4023	162.71		0.40233	25.07		0.4023	20.94
0.4031	162.67		0.40312	25.07		0.4031	20.86
0.4039	162.61		0.40392	25.07		0.4039	20.77
0.4047	162.54		0.40472	25.07		0.4047	20.68
0.4055	162.47		0.40551	25.07		0.4055	20.59
0.4063	162.43		0.40631	25.08		0.4063	20.52
0.4071	162.42		0.40711	25.09		0.4071	20.47
0.4079	162.41		0.4079	25.1		0.4079	20.43
0.4087	162.39		0.4087	25.11		0.4087	20.4
0.4095	162.37		0.4095	25.11		0.4095	20.37
0.4103	162.34		0.41029	25.11		0.4103	20.34
0.4111	162.3		0.41109	25.11		0.4111	20.3
0.4119	162.26		0.41189	25.11		0.4119	20.25
0.4127	162.23		0.41268	25.11		0.4127	20.22
0.4135	162.21		0.41348	25.11		0.4135	20.2
0.4143	162.18		0.41428	25.11		0.4143	20.18
0.4151	162.15		0.41507	25.12		0.4151	20.17
0.4159	162.1		0.41587	25.12		0.4159	20.16
0.4167	162.04		0.41667	25.12		0.4167	20.15
0.4175	161.97		0.41746	25.13		0.4175	20.15
0.4183	161.9		0.41826	25.15		0.4183	20.16
0.4191	161.83		0.41906	25.18		0.4191	20.15
0.4199	161.77		0.41985	25.21		0.4199	20.13
0.4207	161.71		0.42065	25.24		0.4207	20.07
0.4214	161.67		0.42145	25.26		0.4214	19.99
0.4222	161.63		0.42224	25.29		0.4222	19.91
0.423	161.61		0.42304	25.32		0.423	19.86
0.4238	161.58		0.42384	25.36		0.4238	19.81
0.4246	161.53		0.42463	25.42		0.4246	19.78
0.4254	161.48		0.42543	25.49		0.4254	19.75
0.4262	161.42		0.42623	25.57		0.4262	19.7
0.427	161.37		0.42702	25.66		0.427	19.67
0.4278	161.32		0.42782	25.75		0.4278	19.66
0.4286	161.28		0.42862	25.83		0.4286	19.65
0.4294	161.26		0.42941	25.9		0.4294	19.62
0.4302	161.23		0.43021	25.96		0.4302	19.61
0.431	161.18		0.43101	26.03		0.431	19.61
0.4318	161.12		0.4318	26.09		0.4318	19.61
0.4326	161.06		0.4326	26.15		0.4326	19.63
0.4334	160.99		0.4334	26.19		0.4334	19.67
0.4342	160.89		0.43419	26.23		0.4342	19.73
0.435	160.77		0.43499	26.26		0.435	19.78
0.4358	160.64		0.43579	26.3		0.4358	19.81
0.4366	160.51		0.43658	26.34		0.4366	19.82
0.4374	160.39		0.43738	26.38		0.4374	19.82
0.4382	160.3		0.43818	26.42		0.4382	19.81
0.439	160.24		0.43897	26.46		0.439	19.8
0.4398	160.22		0.43977	26.51		0.4398	19.79
0.4406	160.2		0.44057	26.56		0.4406	19.79
0.4414	160.18		0.44136	26.62		0.4414	19.79
0.4422	160.16		0.44216	26.68		0.4422	19.76
0.443	160.13		0.44296	26.74		0.443	19.71
0.4438	160.09		0.44375	26.79		0.4438	19.66
0.4446	160.05		0.44455	26.82		0.4446	19.61
0.4453	160.02		0.44535	26.85		0.4453	19.55
0.4461	159.98		0.44614	26.88		0.4461	19.48
0.4469	159.92		0.44694	26.91		0.4469	19.39
0.4477	159.86		0.44774	26.96		0.4477	19.29
0.4485	159.81		0.44853	27.01		0.4485	19.18
0.4493	159.77		0.44933	27.05		0.4493	19.08
0.4501	159.72		0.45013	27.08		0.4501	18.99
0.4509	159.67		0.45092	27.1		0.4509	18.93
0.4517	159.61		0.45172	27.11		0.4517	18.9
0.4525	159.56		0.45252	27.11		0.4525	18.88
0.4533	159.5		0.45331	27.1		0.4533	18.86
0.4541	159.43		0.45411	27.09		0.4541	18.87
0.4549	159.34		0.45491	27.08		0.4549	18.9
0.4557	159.26		0.4557	27.07		0.4557	18.97
0.4565	159.17		0.4565	27.06		0.4565	19.08
0.4573	159.1		0.4573	27.04		0.4573	19.2
0.4581	159.02		0.45809	27.03		0.4581	19.32
0.4589	158.94		0.45889	27.02		0.4589	19.43
0.4597	158.86		0.45969	27.01		0.4597	19.52
0.4605	158.79		0.46048	27		0.4605	19.59
0.4613	158.72		0.46128	26.97		0.4613	19.65
0.4621	158.66		0.46208	26.93		0.4621	19.7
0.4629	158.61		0.46287	26.88		0.4629	19.74
0.4637	158.56		0.46367	26.83		0.4637	19.79
0.4645	158.51		0.46447	26.79		0.4645	19.84
0.4653	158.46		0.46526	26.75		0.4653	19.89
0.4661	158.42		0.46606	26.71		0.4661	19.94
0.4669	158.38		0.46686	26.66		0.4669	19.99
0.4677	158.35		0.46765	26.6		0.4677	20.07
0.4685	158.32		0.46845	26.55		0.4685	20.17
0.4692	158.26		0.46925	26.49		0.4692	20.3
0.47	158.19		0.47004	26.42		0.47	20.46
0.4708	158.12		0.47084	26.37		0.4708	20.66
0.4716	158.06		0.47164	26.33		0.4716	20.87
0.4724	158.04		0.47243	26.29		0.4724	21.09
0.4732	158.05		0.47323	26.26		0.4732	21.3
0.474	158.08		0.47403	26.24		0.474	21.5
0.4748	158.11		0.47482	26.23		0.4748	21.69
0.4756	158.12		0.47562	26.22		0.4756	21.87
0.4764	158.11		0.47642	26.21		0.4764	22.04
0.4772	158.11		0.47721	26.21		0.4772	22.2
0.478	158.11		0.47801	26.22		0.478	22.34
0.4788	158.11		0.47881	26.24		0.4788	22.47
0.4796	158.11		0.4796	26.27		0.4796	22.56
0.4804	158.11		0.4804	26.3		0.4804	22.63
0.4812	158.12		0.4812	26.32		0.4812	22.72
0.482	158.15		0.48199	26.34		0.482	22.8
0.4828	158.21		0.48279	26.35		0.4828	22.87
0.4836	158.27		0.48359	26.36		0.4836	22.95
0.4844	158.31		0.48438	26.37		0.4844	23.03
0.4852	158.32		0.48518	26.38		0.4852	23.12
0.486	158.29		0.48598	26.39		0.486	23.2
0.4868	158.24		0.48678	26.4		0.4868	23.24
0.4876	158.2		0.48757	26.4		0.4876	23.29
0.4884	158.17		0.48837	26.4		0.4884	23.33
0.4892	158.17		0.48917	26.4		0.4892	23.37
0.49	158.19		0.48996	26.4		0.49	23.39
0.4908	158.2		0.49076	26.4		0.4908	23.37
0.4916	158.21		0.49156	26.4		0.4916	23.33
0.4924	158.2		0.49235	26.4		0.4924	23.25
0.4931	158.18		0.49315	26.4		0.4931	23.15
0.4939	158.17		0.49395	26.41		0.4939	23.04
0.4947	158.17		0.49474	26.42		0.4947	22.92
0.4955	158.19		0.49554	26.44		0.4955	22.79
0.4963	158.22		0.49634	26.47		0.4963	22.65
0.4971	158.26		0.49713	26.5		0.4971	22.5
0.4979	158.28		0.49793	26.52		0.4979	22.34
0.4987	158.31		0.49873	26.52		0.4987	22.19
0.4995	158.31		0.49952	26.51		0.4995	22.05
0.5003	158.3		0.50032	26.5		0.5003	21.93
0.5011	158.26		0.50112	26.5		0.5011	21.83
0.5019	158.2		0.50191	26.49		0.5019	21.74
0.5027	158.14		0.50271	26.48		0.5027	21.62
0.5035	158.08		0.50351	26.46		0.5035	21.5
0.5043	158.03		0.5043	26.42		0.5043	21.36
0.5051	157.98		0.5051	26.37		0.5051	21.22
0.5059	157.93		0.5059	26.31		0.5059	21.1
0.5067	157.88		0.50669	26.25		0.5067	20.99
0.5075	157.86		0.50749	26.19		0.5075	20.87
0.5083	157.86		0.50829	26.14		0.5083	20.75
0.5091	157.89		0.50908	26.09		0.5091	20.65
0.5099	157.95		0.50988	26.05		0.5099	20.54
0.5107	158.02		0.51068	26.01		0.5107	20.45
0.5115	158.08		0.51147	25.98		0.5115	20.39
0.5123	158.13		0.51227	25.95		0.5123	20.33
0.5131	158.17		0.51307	25.93		0.5131	20.28
0.5139	158.22		0.51386	25.91		0.5139	20.22
0.5147	158.28		0.51466	25.9		0.5147	20.18
0.5155	158.34		0.51546	25.88		0.5155	20.15
0.5163	158.41		0.51625	25.86		0.5163	20.13
0.517	158.49		0.51705	25.83		0.517	20.11
0.5178	158.58		0.51785	25.81		0.5178	20.1
0.5186	158.67		0.51864	25.8		0.5186	20.09
0.5194	158.74		0.51944	25.8		0.5194	20.1
0.5202	158.82		0.52024	25.82		0.5202	20.12
0.521	158.9		0.52103	25.85		0.521	20.15
0.5218	158.97		0.52183	25.89		0.5218	20.22
0.5226	159.02		0.52263	25.93		0.5226	20.3
0.5234	159.06		0.52342	25.98		0.5234	20.37
0.5242	159.08		0.52422	26.03		0.5242	20.44
0.525	159.1		0.52502	26.08		0.525	20.51
0.5258	159.12		0.52581	26.13		0.5258	20.59
0.5266	159.13		0.52661	26.18		0.5266	20.68
0.5274	159.13		0.52741	26.22		0.5274	20.77
0.5282	159.13		0.5282	26.25		0.5282	20.87
0.529	159.11		0.529	26.28		0.529	20.96
0.5298	159.09		0.5298	26.3		0.5298	21.04
0.5306	159.06		0.53059	26.32		0.5306	21.1
0.5314	159.02		0.53139	26.35		0.5314	21.14
0.5322	158.98		0.53219	26.39		0.5322	21.18
0.533	158.97		0.53298	26.44		0.533	21.23
0.5338	158.99		0.53378	26.5		0.5338	21.26
0.5346	159.02		0.53458	26.56		0.5346	21.26
0.5354	159.03		0.53537	26.62		0.5354	21.23
0.5362	159.02		0.53617	26.68		0.5362	21.14
0.537	159		0.53697	26.74		0.537	21.03
0.5378	159		0.53776	26.78		0.5378	20.91
0.5386	159.01		0.53856	26.82		0.5386	20.79
0.5394	159.03		0.53936	26.85		0.5394	20.67
0.5402	159.05		0.54015	26.88		0.5402	20.58
0.5409	159.07		0.54095	26.92		0.5409	20.49
0.5417	159.09		0.54175	26.95		0.5417	20.42
0.5425	159.1		0.54254	26.98		0.5425	20.38
0.5433	159.11		0.54334	27.01		0.5433	20.36
0.5441	159.11		0.54414	27.05		0.5441	20.37
0.5449	159.1		0.54493	27.1		0.5449	20.4
0.5457	159.06		0.54573	27.15		0.5457	20.42
0.5465	159.03		0.54653	27.2		0.5465	20.46
0.5473	159.01		0.54732	27.24		0.5473	20.48
0.5481	159		0.54812	27.26		0.5481	20.49
0.5489	159.01		0.54892	27.27		0.5489	20.49
0.5497	159.03		0.54971	27.28		0.5497	20.45
0.5505	159.06		0.55051	27.28		0.5505	20.36
0.5513	159.07		0.55131	27.27		0.5513	20.24
0.5521	159.05		0.5521	27.27		0.5521	20.11
0.5529	159.01		0.5529	27.27		0.5529	19.98
0.5537	158.97		0.5537	27.26		0.5537	19.86
0.5545	158.94		0.55449	27.25		0.5545	19.75
0.5553	158.92		0.55529	27.24		0.5553	19.64
0.5561	158.92		0.55609	27.24		0.5561	19.53
0.5569	158.92		0.55688	27.23		0.5569	19.44
0.5577	158.93		0.55768	27.22		0.5577	19.37
0.5585	158.92		0.55848	27.2		0.5585	19.33
0.5593	158.88		0.55927	27.17		0.5593	19.32
0.5601	158.83		0.56007	27.14		0.5601	19.35
0.5609	158.79		0.56087	27.12		0.5609	19.38
0.5617	158.76		0.56166	27.1		0.5617	19.42
0.5625	158.73		0.56246	27.09		0.5625	19.46
0.5633	158.71		0.56326	27.08		0.5633	19.49
0.5641	158.69		0.56405	27.07		0.5641	19.5
0.5649	158.68		0.56485	27.06		0.5649	19.51
0.5656	158.68		0.56565	27.05		0.5656	19.54
0.5664	158.65		0.56644	27.03		0.5664	19.62
0.5672	158.62		0.56724	27.02		0.5672	19.72
0.568	158.58		0.56804	27.01		0.568	19.85
0.5688	158.52		0.56883	27.01		0.5688	19.98
0.5696	158.47		0.56963	27.01		0.5696	20.12
0.5704	158.45		0.57043	27.01		0.5704	20.28
0.5712	158.45		0.57122	27.01		0.5712	20.46
0.572	158.47		0.57202	27.01		0.572	20.66
0.5728	158.49		0.57282	27.02		0.5728	20.86
0.5736	158.49		0.57361	27.02		0.5736	21.08
0.5744	158.46		0.57441	27.02		0.5744	21.33
0.5752	158.39		0.57521	27.01		0.5752	21.6
0.576	158.3		0.576	26.99		0.576	21.87
0.5768	158.19		0.5768	26.96		0.5768	22.12
0.5776	158.1		0.5776	26.94		0.5776	22.32
0.5784	158.02		0.57839	26.93		0.5784	22.49
0.5792	157.96		0.57919	26.92		0.5792	22.65
0.58	157.91		0.57999	26.91		0.58	22.81
0.5808	157.89		0.58078	26.89		0.5808	22.98
0.5816	157.89		0.58158	26.87		0.5816	23.12
0.5824	157.9		0.58238	26.85		0.5824	23.25
0.5832	157.92		0.58317	26.83		0.5832	23.36
0.584	157.96		0.58397	26.81		0.584	23.48
0.5848	158.02		0.58477	26.79		0.5848	23.64
0.5856	158.08		0.58556	26.78		0.5856	23.84
0.5864	158.14		0.58636	26.76		0.5864	24.06
0.5872	158.17		0.58716	26.74		0.5872	24.28
0.588	158.18		0.58795	26.72		0.588	24.51
0.5888	158.16		0.58875	26.71		0.5888	24.74
0.5895	158.12		0.58955	26.7		0.5895	24.96
0.5903	158.07		0.59034	26.68		0.5903	25.17
0.5911	158.03		0.59114	26.65		0.5911	25.34
0.5919	157.99		0.59194	26.61		0.5919	25.5
0.5927	157.97		0.59273	26.57		0.5927	25.63
0.5935	157.96		0.59353	26.53		0.5935	25.74
0.5943	157.95		0.59433	26.49		0.5943	25.81
0.5951	157.94		0.59512	26.48		0.5951	25.87
0.5959	157.92		0.59592	26.48		0.5959	25.92
0.5967	157.89		0.59672	26.5		0.5967	25.98
0.5975	157.84		0.59751	26.52		0.5975	26.05
0.5983	157.78		0.59831	26.53		0.5983	26.13
0.5991	157.73		0.59911	26.53		0.5991	26.22
0.5999	157.67		0.5999	26.5		0.5999	26.32
0.6007	157.58		0.6007	26.44		0.6007	26.44
0.6015	157.5		0.6015	26.36		0.6015	26.56
0.6023	157.45		0.60229	26.28		0.6023	26.71
0.6031	157.42		0.60309	26.2		0.6031	26.88
0.6039	157.41		0.60389	26.14		0.6039	27.05
0.6047	157.39		0.60468	26.09		0.6047	27.22
0.6055	157.36		0.60548	26.04		0.6055	27.37
0.6063	157.35		0.60628	25.99		0.6063	27.5
0.6071	157.35		0.60707	25.94		0.6071	27.63
0.6079	157.34		0.60787	25.89		0.6079	27.74
0.6087	157.33		0.60867	25.84		0.6087	27.81
0.6095	157.32		0.60946	25.81		0.6095	27.86
0.6103	157.31		0.61026	25.78		0.6103	27.91
0.6111	157.31		0.61106	25.75		0.6111	27.96
0.6119	157.3		0.61185	25.72		0.6119	28.01
0.6127	157.27		0.61265	25.68		0.6127	28.05
0.6134	157.22		0.61345	25.63		0.6134	28.09
0.6142	157.17		0.61424	25.58		0.6142	28.14
0.615	157.13		0.61504	25.54		0.615	28.19
0.6158	157.11		0.61584	25.51		0.6158	28.25
0.6166	157.1		0.61663	25.48		0.6166	28.31
0.6174	157.08		0.61743	25.46		0.6174	28.38
0.6182	157.06		0.61823	25.45		0.6182	28.45
0.619	157.03		0.61902	25.45		0.619	28.54
0.6198	157		0.61982	25.45		0.6198	28.63
0.6206	156.96		0.62062	25.45		0.6206	28.75
0.6214	156.92		0.62141	25.46		0.6214	28.88
0.6222	156.88		0.62221	25.48		0.6222	28.99
0.623	156.84		0.62301	25.49		0.623	29.1
0.6238	156.79		0.6238	25.48		0.6238	29.18
0.6246	156.74		0.6246	25.46		0.6246	29.23
0.6254	156.71		0.6254	25.44		0.6254	29.29
0.6262	156.67		0.6262	25.42		0.6262	29.35
0.627	156.61		0.62699	25.41		0.627	29.41
0.6278	156.54		0.62779	25.42		0.6278	29.47
0.6286	156.47		0.62859	25.44		0.6286	29.51
0.6294	156.43		0.62938	25.46		0.6294	29.55
0.6302	156.4		0.63018	25.49		0.6302	29.58
0.631	156.38		0.63098	25.53		0.631	29.6
0.6318	156.37		0.63177	25.57		0.6318	29.6
0.6326	156.38		0.63257	25.62		0.6326	29.58
0.6334	156.4		0.63337	25.68		0.6334	29.55
0.6342	156.43		0.63416	25.73		0.6342	29.52
0.635	156.47		0.63496	25.78		0.635	29.5
0.6358	156.51		0.63576	25.81		0.6358	29.5
0.6366	156.56		0.63655	25.84		0.6366	29.49
0.6373	156.59		0.63735	25.86		0.6373	29.47
0.6381	156.62		0.63815	25.87		0.6381	29.44
0.6389	156.67		0.63894	25.88		0.6389	29.39
0.6397	156.73		0.63974	25.88		0.6397	29.3
0.6405	156.79		0.64054	25.87		0.6405	29.18
0.6413	156.85		0.64133	25.86		0.6413	29.04
0.6421	156.92		0.64213	25.85		0.6421	28.9
0.6429	156.98		0.64293	25.84		0.6429	28.75
0.6437	157.04		0.64372	25.83		0.6437	28.61
0.6445	157.09		0.64452	25.82		0.6445	28.46
0.6453	157.14		0.64532	25.81		0.6453	28.28
0.6461	157.21		0.64611	25.8		0.6461	28.06
0.6469	157.29		0.64691	25.79		0.6469	27.8
0.6477	157.37		0.64771	25.78		0.6477	27.51
0.6485	157.45		0.6485	25.77		0.6485	27.22
0.6493	157.5		0.6493	25.76		0.6493	26.94
0.6501	157.54		0.6501	25.75		0.6501	26.69
0.6509	157.58		0.65089	25.74		0.6509	26.45
0.6517	157.63		0.65169	25.73		0.6517	26.22
0.6525	157.68		0.65249	25.72		0.6525	26.01
0.6533	157.74		0.65328	25.7		0.6533	25.79
0.6541	157.81		0.65408	25.68		0.6541	25.55
0.6549	157.89		0.65488	25.66		0.6549	25.28
0.6557	157.97		0.65567	25.65		0.6557	25.01
0.6565	158.06		0.65647	25.64		0.6565	24.76
0.6573	158.15		0.65727	25.62		0.6573	24.55
0.6581	158.23		0.65806	25.6		0.6581	24.36
0.6589	158.3		0.65886	25.59		0.6589	24.17
0.6597	158.38		0.65966	25.59		0.6597	23.97
0.6605	158.48		0.66045	25.6		0.6605	23.76
0.6612	158.59		0.66125	25.62		0.6612	23.57
0.662	158.68		0.66205	25.64		0.662	23.41
0.6628	158.74		0.66284	25.66		0.6628	23.27
0.6636	158.78		0.66364	25.68		0.6636	23.14
0.6644	158.8		0.66444	25.7		0.6644	22.98
0.6652	158.82		0.66523	25.71		0.6652	22.81
0.666	158.86		0.66603	25.72		0.666	22.63
0.6668	158.91		0.66683	25.72		0.6668	22.46
0.6676	158.95		0.66762	25.72		0.6676	22.27
0.6684	158.98		0.66842	25.72		0.6684	22.09
0.6692	159		0.66922	25.72		0.6692	21.92
0.67	159.04		0.67001	25.72		0.67	21.76
0.6708	159.09		0.67081	25.72		0.6708	21.62
0.6716	159.14		0.67161	25.73		0.6716	21.51
0.6724	159.19		0.6724	25.74		0.6724	21.44
0.6732	159.23		0.6732	25.75		0.6732	21.4
0.674	159.26		0.674	25.76		0.674	21.39
0.6748	159.29		0.67479	25.75		0.6748	21.38
0.6756	159.31		0.67559	25.74		0.6756	21.38
0.6764	159.3		0.67639	25.72		0.6764	21.38
0.6772	159.28		0.67718	25.69		0.6772	21.38
0.678	159.25		0.67798	25.66		0.678	21.38
0.6788	159.21		0.67878	25.63		0.6788	21.39
0.6796	159.17		0.67957	25.61		0.6796	21.39
0.6804	159.15		0.68037	25.6		0.6804	21.37
0.6812	159.15		0.68117	25.61		0.6812	21.34
0.682	159.15		0.68196	25.62		0.682	21.28
0.6828	159.16		0.68276	25.63		0.6828	21.18
0.6836	159.18		0.68356	25.62		0.6836	21.07
0.6844	159.2		0.68435	25.6		0.6844	20.94
0.6851	159.24		0.68515	25.58		0.6851	20.82
0.6859	159.26		0.68595	25.56		0.6859	20.71
0.6867	159.28		0.68674	25.53		0.6867	20.61
0.6875	159.32		0.68754	25.52		0.6875	20.52
0.6883	159.38		0.68834	25.52		0.6883	20.47
0.6891	159.44		0.68913	25.52		0.6891	20.45
0.6899	159.5		0.68993	25.53		0.6899	20.43
0.6907	159.56		0.69073	25.55		0.6907	20.4
0.6915	159.61		0.69152	25.57		0.6915	20.37
0.6923	159.65		0.69232	25.6		0.6923	20.33
0.6931	159.69		0.69312	25.63		0.6931	20.28
0.6939	159.74		0.69391	25.66		0.6939	20.22
0.6947	159.82		0.69471	25.68		0.6947	20.16
0.6955	159.91		0.69551	25.68		0.6955	20.11
0.6963	159.99		0.6963	25.69		0.6963	20.09
0.6971	160.07		0.6971	25.7		0.6971	20.08
0.6979	160.13		0.6979	25.69		0.6979	20.08
0.6987	160.2		0.69869	25.69		0.6987	20.05
0.6995	160.28		0.69949	25.7		0.6995	20
0.7003	160.37		0.70029	25.72		0.7003	19.92
0.7011	160.46		0.70108	25.74		0.7011	19.81
0.7019	160.55		0.70188	25.76		0.7019	19.69
0.7027	160.63		0.70268	25.79		0.7027	19.56
0.7035	160.71		0.70347	25.82		0.7035	19.41
0.7043	160.82		0.70427	25.84		0.7043	19.27
0.7051	160.95		0.70507	25.85		0.7051	19.14
0.7059	161.1		0.70586	25.86		0.7059	19.01
0.7067	161.28		0.70666	25.86		0.7067	18.88
0.7075	161.47		0.70746	25.85		0.7075	18.75
0.7083	161.64		0.70825	25.84		0.7083	18.63
0.7091	161.76		0.70905	25.83		0.7091	18.54
0.7098	161.86		0.70985	25.82		0.7098	18.46
0.7106	161.96		0.71064	25.82		0.7106	18.4
0.7114	162.06		0.71144	25.83		0.7114	18.36
0.7122	162.14		0.71224	25.84		0.7122	18.36
0.713	162.2		0.71303	25.84		0.713	18.39
0.7138	162.23		0.71383	25.84		0.7138	18.44
0.7146	162.25		0.71463	25.83		0.7146	18.5
0.7154	162.27		0.71542	25.82		0.7154	18.56
0.7162	162.27		0.71622	25.81		0.7162	18.63
0.717	162.27		0.71702	25.79		0.717	18.71
0.7178	162.26		0.71781	25.78		0.7178	18.81
0.7186	162.23		0.71861	25.77		0.7186	18.94
0.7194	162.2		0.71941	25.78		0.7194	19.1
0.7202	162.16		0.7202	25.81		0.7202	19.28
0.721	162.11		0.721	25.84		0.721	19.47
0.7218	162.05		0.7218	25.87		0.7218	19.65
0.7226	162.01		0.72259	25.9		0.7226	19.82
0.7234	161.99		0.72339	25.93		0.7234	19.97
0.7242	161.98		0.72419	25.95		0.7242	20.09
0.725	161.97		0.72498	25.97		0.725	20.21
0.7258	161.94		0.72578	26		0.7258	20.31
0.7266	161.89		0.72658	26.02		0.7266	20.4
0.7274	161.85		0.72737	26.04		0.7274	20.48
0.7282	161.82		0.72817	26.07		0.7282	20.58
0.729	161.8		0.72897	26.11		0.729	20.68
0.7298	161.76		0.72976	26.17		0.7298	20.78
0.7306	161.69		0.73056	26.24		0.7306	20.88
0.7314	161.6		0.73136	26.32		0.7314	20.99
0.7322	161.51		0.73215	26.39		0.7322	21.1
0.733	161.46		0.73295	26.46		0.733	21.21
0.7337	161.43		0.73375	26.53		0.7337	21.3
0.7345	161.41		0.73454	26.61		0.7345	21.38
0.7353	161.4		0.73534	26.69		0.7353	21.47
0.7361	161.4		0.73614	26.78		0.7361	21.57
0.7369	161.41		0.73693	26.87		0.7369	21.68
0.7377	161.44		0.73773	26.95		0.7377	21.78
0.7385	161.49		0.73853	27.03		0.7385	21.87
0.7393	161.53		0.73932	27.09		0.7393	21.95
0.7401	161.53		0.74012	27.14		0.7401	22.01
0.7409	161.5		0.74092	27.18		0.7409	22.06
0.7417	161.46		0.74171	27.21		0.7417	22.09
0.7425	161.44		0.74251	27.24		0.7425	22.12
0.7433	161.43		0.74331	27.27		0.7433	22.14
0.7441	161.41		0.7441	27.29		0.7441	22.16
0.7449	161.4		0.7449	27.32		0.7449	22.15
0.7457	161.37		0.7457	27.35		0.7457	22.12
0.7465	161.35		0.74649	27.39		0.7465	22.07
0.7473	161.34		0.74729	27.44		0.7473	22.03
0.7481	161.32		0.74809	27.48		0.7481	21.97
0.7489	161.3		0.74888	27.53		0.7489	21.91
0.7497	161.26		0.74968	27.59		0.7497	21.84
0.7505	161.21		0.75048	27.66		0.7505	21.77
0.7513	161.17		0.75127	27.75		0.7513	21.67
0.7521	161.13		0.75207	27.84		0.7521	21.55
0.7529	161.1		0.75287	27.93		0.7529	21.41
0.7537	161.08		0.75366	28.03		0.7537	21.27
0.7545	161.05		0.75446	28.12		0.7545	21.14
0.7553	161.03		0.75526	28.19		0.7553	21.01
0.7561	161.03		0.75605	28.25		0.7561	20.89
0.7569	161.05		0.75685	28.31		0.7569	20.76
0.7576	161.08		0.75765	28.36		0.7576	20.62
0.7584	161.11		0.75844	28.41		0.7584	20.45
0.7592	161.16		0.75924	28.46		0.7592	20.28
0.76	161.21		0.76004	28.51		0.76	20.12
0.7608	161.25		0.76083	28.55		0.7608	19.97
0.7616	161.29		0.76163	28.59		0.7616	19.84
0.7624	161.32		0.76243	28.63		0.7624	19.75
0.7632	161.33		0.76322	28.68		0.7632	19.67
0.764	161.33		0.76402	28.74		0.764	19.61
0.7648	161.31		0.76482	28.82		0.7648	19.55
0.7656	161.29		0.76562	28.91		0.7656	19.49
0.7664	161.28		0.76641	29.02		0.7664	19.43
0.7672	161.27		0.76721	29.13		0.7672	19.39
0.768	161.26		0.76801	29.23		0.768	19.37
0.7688	161.25		0.7688	29.32		0.7688	19.33
0.7696	161.24		0.7696	29.4		0.7696	19.28
0.7704	161.23		0.7704	29.46		0.7704	19.23
0.7712	161.22		0.77119	29.51		0.7712	19.17
0.772	161.21		0.77199	29.55		0.772	19.12
0.7728	161.2		0.77279	29.59		0.7728	19.07
0.7736	161.19		0.77358	29.62		0.7736	19.03
0.7744	161.15		0.77438	29.64		0.7744	18.99
0.7752	161.1		0.77518	29.68		0.7752	18.95
0.776	161.05		0.77597	29.72		0.776	18.88
0.7768	160.99		0.77677	29.76		0.7768	18.79
0.7776	160.94		0.77757	29.83		0.7776	18.7
0.7784	160.9		0.77836	29.9		0.7784	18.63
0.7792	160.85		0.77916	29.97		0.7792	18.57
0.78	160.81		0.77996	30.03		0.78	18.53
0.7808	160.77		0.78075	30.09		0.7808	18.51
0.7815	160.74		0.78155	30.14		0.7815	18.51
0.7823	160.7		0.78235	30.19		0.7823	18.52
0.7831	160.65		0.78314	30.24		0.7831	18.57
0.7839	160.59		0.78394	30.3		0.7839	18.64
0.7847	160.51		0.78474	30.36		0.7847	18.72
0.7855	160.41		0.78553	30.41		0.7855	18.8
0.7863	160.29		0.78633	30.46		0.7863	18.88
0.7871	160.15		0.78713	30.51		0.7871	18.96
0.7879	160.03		0.78792	30.56		0.7879	19.03
0.7887	159.94		0.78872	30.61		0.7887	19.07
0.7895	159.87		0.78952	30.66		0.7895	19.11
0.7903	159.81		0.79031	30.7		0.7903	19.14
0.7911	159.74		0.79111	30.72		0.7911	19.16
0.7919	159.66		0.79191	30.73		0.7919	19.16
0.7927	159.57		0.7927	30.73		0.7927	19.13
0.7935	159.49		0.7935	30.73		0.7935	19.06
0.7943	159.42		0.7943	30.72		0.7943	18.98
0.7951	159.35		0.79509	30.71		0.7951	18.89
0.7959	159.32		0.79589	30.68		0.7959	18.78
0.7967	159.32		0.79669	30.66		0.7967	18.65
0.7975	159.34		0.79748	30.65		0.7975	18.48
0.7983	159.35		0.79828	30.65		0.7983	18.29
0.7991	159.35		0.79908	30.64		0.7991	18.09
0.7999	159.36		0.79987	30.62		0.7999	17.89
0.8007	159.38		0.80067	30.61		0.8007	17.7
0.8015	159.41		0.80147	30.6		0.8015	17.52
0.8023	159.44		0.80226	30.6		0.8023	17.36
0.8031	159.45		0.80306	30.61		0.8031	17.22
0.8039	159.46		0.80386	30.65		0.8039	17.11
0.8047	159.47		0.80465	30.7		0.8047	17
0.8054	159.5		0.80545	30.76		0.8054	16.91
0.8062	159.54		0.80625	30.84		0.8062	16.82
0.807	159.56		0.80704	30.92		0.807	16.74
0.8078	159.55		0.80784	30.99		0.8078	16.65
0.8086	159.51		0.80864	31.05		0.8086	16.56
0.8094	159.48		0.80943	31.08		0.8094	16.46
0.8102	159.48		0.81023	31.08		0.8102	16.36
0.811	159.5		0.81103	31.07		0.811	16.25
0.8118	159.53		0.81182	31.05		0.8118	16.14
0.8126	159.54		0.81262	31.04		0.8126	16.03
0.8134	159.51		0.81342	31.02		0.8134	15.93
0.8142	159.47		0.81421	31		0.8142	15.85
0.815	159.43		0.81501	30.97		0.815	15.76
0.8158	159.39		0.81581	30.93		0.8158	15.65
0.8166	159.35		0.8166	30.9		0.8166	15.53
0.8174	159.28		0.8174	30.89		0.8174	15.42
0.8182	159.2		0.8182	30.88		0.8182	15.31
0.819	159.13		0.81899	30.88		0.819	15.21
0.8198	159.07		0.81979	30.89		0.8198	15.12
0.8206	159.03		0.82059	30.91		0.8206	15.04
0.8214	159		0.82138	30.94		0.8214	14.97
0.8222	158.99		0.82218	30.97		0.8222	14.9
0.823	159		0.82298	31.01		0.823	14.83
0.8238	159.04		0.82377	31.06		0.8238	14.76
0.8246	159.09		0.82457	31.1		0.8246	14.7
0.8254	159.15		0.82537	31.14		0.8254	14.65
0.8262	159.19		0.82616	31.19		0.8262	14.61
0.827	159.23		0.82696	31.24		0.827	14.58
0.8278	159.28		0.82776	31.3		0.8278	14.55
0.8286	159.33		0.82855	31.35		0.8286	14.52
0.8293	159.38		0.82935	31.39		0.8293	14.49
0.8301	159.43		0.83015	31.42		0.8301	14.46
0.8309	159.48		0.83094	31.42		0.8309	14.43
0.8317	159.52		0.83174	31.41		0.8317	14.4
0.8325	159.56		0.83254	31.4		0.8325	14.38
0.8333	159.61		0.83333	31.38		0.8333	14.36
0.8341	159.67		0.83413	31.36		0.8341	14.35
0.8349	159.74		0.83493	31.34		0.8349	14.35
0.8357	159.83		0.83572	31.32		0.8357	14.36
0.8365	159.92		0.83652	31.29		0.8365	14.39
0.8373	160.02		0.83732	31.26		0.8373	14.43
0.8381	160.11		0.83811	31.22		0.8381	14.48
0.8389	160.18		0.83891	31.18		0.8389	14.53
0.8397	160.25		0.83971	31.13		0.8397	14.58
0.8405	160.31		0.8405	31.08		0.8405	14.63
0.8413	160.37		0.8413	31.03		0.8413	14.68
0.8421	160.42		0.8421	30.97		0.8421	14.72
0.8429	160.48		0.84289	30.91		0.8429	14.78
0.8437	160.57		0.84369	30.84		0.8437	14.84
0.8445	160.66		0.84449	30.76		0.8445	14.91
0.8453	160.74		0.84528	30.68		0.8453	14.98
0.8461	160.8		0.84608	30.6		0.8461	15.03
0.8469	160.83		0.84688	30.53		0.8469	15.07
0.8477	160.84		0.84767	30.48		0.8477	15.1
0.8485	160.84		0.84847	30.45		0.8485	15.15
0.8493	160.84		0.84927	30.42		0.8493	15.22
0.8501	160.84		0.85006	30.4		0.8501	15.31
0.8509	160.86		0.85086	30.39		0.8509	15.42
0.8517	160.88		0.85166	30.37		0.8517	15.54
0.8525	160.91		0.85245	30.35		0.8525	15.67
0.8533	160.94		0.85325	30.33		0.8533	15.79
0.854	160.98		0.85405	30.32		0.854	15.89
0.8548	161.03		0.85484	30.3		0.8548	15.98
0.8556	161.09		0.85564	30.27		0.8556	16.06
0.8564	161.18		0.85644	30.24		0.8564	16.15
0.8572	161.28		0.85723	30.19		0.8572	16.23
0.858	161.37		0.85803	30.13		0.858	16.29
0.8588	161.46		0.85883	30.07		0.8588	16.34
0.8596	161.52		0.85962	30.01		0.8596	16.37
0.8604	161.57		0.86042	29.96		0.8604	16.4
0.8612	161.61		0.86122	29.94		0.8612	16.42
0.862	161.66		0.86201	29.93		0.862	16.43
0.8628	161.74		0.86281	29.93		0.8628	16.42
0.8636	161.81		0.86361	29.93		0.8636	16.39
0.8644	161.88		0.8644	29.93		0.8644	16.34
0.8652	161.96		0.8652	29.93		0.8652	16.3
0.866	162.05		0.866	29.94		0.866	16.27
0.8668	162.17		0.86679	29.94		0.8668	16.25
0.8676	162.28		0.86759	29.93		0.8676	16.23
0.8684	162.38		0.86839	29.92		0.8684	16.23
0.8692	162.47		0.86918	29.9		0.8692	16.23
0.87	162.55		0.86998	29.87		0.87	16.23
0.8708	162.64		0.87078	29.84		0.8708	16.24
0.8716	162.75		0.87157	29.81		0.8716	16.26
0.8724	162.88		0.87237	29.79		0.8724	16.29
0.8732	163.02		0.87317	29.78		0.8732	16.34
0.874	163.15		0.87396	29.79		0.874	16.38
0.8748	163.27		0.87476	29.81		0.8748	16.41
0.8756	163.36		0.87556	29.85		0.8756	16.45
0.8764	163.42		0.87635	29.9		0.8764	16.49
0.8772	163.47		0.87715	29.95		0.8772	16.54
0.8779	163.52		0.87795	30		0.8779	16.59
0.8787	163.56		0.87874	30.06		0.8787	16.64
0.8795	163.58		0.87954	30.13		0.8795	16.69
0.8803	163.59		0.88034	30.19		0.8803	16.74
0.8811	163.6		0.88113	30.25		0.8811	16.79
0.8819	163.59		0.88193	30.3		0.8819	16.83
0.8827	163.59		0.88273	30.33		0.8827	16.87
0.8835	163.61		0.88352	30.32		0.8835	16.9
0.8843	163.65		0.88432	30.3		0.8843	16.93
0.8851	163.7		0.88512	30.26		0.8851	16.96
0.8859	163.75		0.88591	30.21		0.8859	17
0.8867	163.81		0.88671	30.16		0.8867	17.03
0.8875	163.88		0.88751	30.11		0.8875	17.06
0.8883	163.97		0.8883	30.06		0.8883	17.08
0.8891	164.05		0.8891	30.02		0.8891	17.1
0.8899	164.09		0.8899	29.99		0.8899	17.12
0.8907	164.11		0.89069	29.96		0.8907	17.14
0.8915	164.12		0.89149	29.94		0.8915	17.16
0.8923	164.13		0.89229	29.92		0.8923	17.17
0.8931	164.16		0.89308	29.91		0.8931	17.18
0.8939	164.19		0.89388	29.89		0.8939	17.19
0.8947	164.23		0.89468	29.87		0.8947	17.2
0.8955	164.29		0.89547	29.86		0.8955	17.21
0.8963	164.36		0.89627	29.85		0.8963	17.22
0.8971	164.44		0.89707	29.83		0.8971	17.22
0.8979	164.5		0.89786	29.82		0.8979	17.23
0.8987	164.54		0.89866	29.81		0.8987	17.24
0.8995	164.57		0.89946	29.81		0.8995	17.25
0.9003	164.6		0.90025	29.81		0.9003	17.26
0.9011	164.64		0.90105	29.8		0.9011	17.27
0.9018	164.68		0.90185	29.78		0.9018	17.29
0.9026	164.7		0.90264	29.75		0.9026	17.31
0.9034	164.71		0.90344	29.72		0.9034	17.33
0.9042	164.72		0.90424	29.68		0.9042	17.35
0.905	164.74		0.90504	29.64		0.905	17.37
0.9058	164.77		0.90583	29.59		0.9058	17.39
0.9066	164.81		0.90663	29.53		0.9066	17.4
0.9074	164.86		0.90743	29.45		0.9074	17.42
0.9082	164.93		0.90822	29.38		0.9082	17.44
0.909	165.02		0.90902	29.31		0.909	17.45
0.9098	165.11		0.90982	29.24		0.9098	17.46
0.9106	165.19		0.91061	29.18		0.9106	17.47
0.9114	165.27		0.91141	29.14		0.9114	17.48
0.9122	165.33		0.91221	29.1		0.9122	17.49
0.913	165.37		0.913	29.06		0.913	17.51
0.9138	165.41		0.9138	29.04		0.9138	17.52
0.9146	165.45		0.9146	29.03		0.9146	17.51
0.9154	165.48		0.91539	29.03		0.9154	17.49
0.9162	165.51		0.91619	29.02		0.9162	17.45
0.917	165.54		0.91699	29.01		0.917	17.4
0.9178	165.58		0.91778	29		0.9178	17.34
0.9186	165.62		0.91858	28.99		0.9186	17.27
0.9194	165.66		0.91938	28.99		0.9194	17.19
0.9202	165.71		0.92017	28.99		0.9202	17.1
0.921	165.75		0.92097	29		0.921	17
0.9218	165.8		0.92177	29.01		0.9218	16.9
0.9226	165.86		0.92256	29.02		0.9226	16.79
0.9234	165.88		0.92336	29.04		0.9234	16.69
0.9242	165.89		0.92416	29.05		0.9242	16.59
0.925	165.9		0.92495	29.06		0.925	16.5
0.9257	165.91		0.92575	29.07		0.9257	16.41
0.9265	165.94		0.92655	29.07		0.9265	16.3
0.9273	165.97		0.92734	29.07		0.9273	16.17
0.9281	166.01		0.92814	29.06		0.9281	16.04
0.9289	166.08		0.92894	29.07		0.9289	15.9
0.9297	166.17		0.92973	29.08		0.9297	15.77
0.9305	166.28		0.93053	29.09		0.9305	15.62
0.9313	166.42		0.93133	29.11		0.9313	15.46
0.9321	166.57		0.93212	29.12		0.9321	15.3
0.9329	166.72		0.93292	29.14		0.9329	15.15
0.9337	166.86		0.93372	29.15		0.9337	15.01
0.9345	166.98		0.93451	29.16		0.9345	14.89
0.9353	167.09		0.93531	29.17		0.9353	14.79
0.9361	167.18		0.93611	29.18		0.9361	14.68
0.9369	167.27		0.9369	29.18		0.9369	14.58
0.9377	167.38		0.9377	29.18		0.9377	14.5
0.9385	167.49		0.9385	29.17		0.9385	14.42
0.9393	167.61		0.93929	29.16		0.9393	14.35
0.9401	167.72		0.94009	29.14		0.9401	14.27
0.9409	167.82		0.94089	29.1		0.9409	14.19
0.9417	167.93		0.94168	29.05		0.9417	14.1
0.9425	168.03		0.94248	28.99		0.9425	14.01
0.9433	168.14		0.94328	28.93		0.9433	13.91
0.9441	168.26		0.94407	28.89		0.9441	13.81
0.9449	168.38		0.94487	28.86		0.9449	13.69
0.9457	168.5		0.94567	28.82		0.9457	13.56
0.9465	168.61		0.94646	28.79		0.9465	13.42
0.9473	168.7		0.94726	28.77		0.9473	13.29
0.9481	168.77		0.94806	28.75		0.9481	13.16
0.9489	168.82		0.94885	28.73		0.9489	13.04
0.9496	168.86		0.94965	28.72		0.9496	12.93
0.9504	168.9		0.95045	28.72		0.9504	12.82
0.9512	168.93		0.95124	28.72		0.9512	12.71
0.952	168.95		0.95204	28.73		0.952	12.6
0.9528	168.94		0.95284	28.74		0.9528	12.49
0.9536	168.92		0.95363	28.75		0.9536	12.39
0.9544	168.91		0.95443	28.76		0.9544	12.3
0.9552	168.9		0.95523	28.77		0.9552	12.2
0.956	168.88		0.95602	28.78		0.956	12.11
0.9568	168.84		0.95682	28.78		0.9568	12.03
0.9576	168.8		0.95762	28.77		0.9576	11.95
0.9584	168.76		0.95841	28.75		0.9584	11.86
0.9592	168.75		0.95921	28.72		0.9592	11.78
0.96	168.75		0.96001	28.69		0.96	11.69
0.9608	168.74		0.9608	28.66		0.9608	11.61
0.9616	168.74		0.9616	28.63		0.9616	11.54
0.9624	168.75		0.9624	28.61		0.9624	11.47
0.9632	168.75		0.96319	28.62		0.9632	11.41
0.964	168.74		0.96399	28.63		0.964	11.35
0.9648	168.73		0.96479	28.65		0.9648	11.29
0.9656	168.71		0.96558	28.66		0.9656	11.23
0.9664	168.71		0.96638	28.67		0.9664	11.18
0.9672	168.73		0.96718	28.67		0.9672	11.13
0.968	168.75		0.96797	28.65		0.968	11.09
0.9688	168.78		0.96877	28.62		0.9688	11.05
0.9696	168.83		0.96957	28.6		0.9696	11.01
0.9704	168.88		0.97036	28.58		0.9704	10.97
0.9712	168.92		0.97116	28.56		0.9712	10.93
0.972	168.96		0.97196	28.55		0.972	10.9
0.9728	169.01		0.97275	28.54		0.9728	10.88
0.9736	169.08		0.97355	28.53		0.9736	10.87
0.9743	169.15		0.97435	28.52		0.9743	10.86
0.9751	169.18		0.97514	28.5		0.9751	10.87
0.9759	169.2		0.97594	28.46		0.9759	10.88
0.9767	169.21		0.97674	28.41		0.9767	10.9
0.9775	169.24		0.97753	28.35		0.9775	10.92
0.9783	169.29		0.97833	28.29		0.9783	10.94
0.9791	169.36		0.97913	28.22		0.9791	10.97
0.9799	169.42		0.97992	28.16		0.9799	11
0.9807	169.48		0.98072	28.11		0.9807	11.03
0.9815	169.53		0.98152	28.07		0.9815	11.06
0.9823	169.59		0.98231	28.03		0.9823	11.09
0.9831	169.64		0.98311	27.98		0.9831	11.14
0.9839	169.67		0.98391	27.95		0.9839	11.19
0.9847	169.68		0.9847	27.92		0.9847	11.24
0.9855	169.68		0.9855	27.89		0.9855	11.29
0.9863	169.67		0.9863	27.86		0.9863	11.33
0.9871	169.66		0.98709	27.84		0.9871	11.37
0.9879	169.66		0.98789	27.8		0.9879	11.4
0.9887	169.65		0.98869	27.76		0.9887	11.44
0.9895	169.64		0.98948	27.72		0.9895	11.48
0.9903	169.61		0.99028	27.68		0.9903	11.54
0.9911	169.59		0.99108	27.63		0.9911	11.61
0.9919	169.58		0.99187	27.58		0.9919	11.68
0.9927	169.58		0.99267	27.53		0.9927	11.74
0.9935	169.59		0.99347	27.47		0.9935	11.79
0.9943	169.59		0.99426	27.41		0.9943	11.84
0.9951	169.61		0.99506	27.35		0.9951	11.87
0.9959	169.63		0.99586	27.31		0.9959	11.9
0.9967	169.63		0.99665	27.28		0.9967	11.94
0.9975	169.62		0.99745	27.26		0.9975	11.99
0.9982	169.61		0.99825	27.23		0.9982	12.05
0.999	169.58		0.99904	27.2		0.999	12.11
0.9998	169.54		0.99984	27.17		0.9998	12.16
1.0006	169.49		1.00064	27.13		1.0006	12.2
1.0014	169.43		1.00143	27.1		1.0014	12.24
1.0022	169.34		1.00223	27.08		1.0022	12.27
1.003	169.28		1.00303	27.05		1.003	12.29
1.0038	169.23		1.00382	27.03		1.0038	12.31
1.0046	169.19		1.00462	27		1.0046	12.31
1.0054	169.15		1.00542	26.96		1.0054	12.29
1.0062	169.11		1.00621	26.91		1.0062	12.26
1.007	169.08		1.00701	26.84		1.007	12.23
1.0078	169.06		1.00781	26.77		1.0078	12.2
1.0086	169.02		1.0086	26.69		1.0086	12.19
1.0094	168.95		1.0094	26.61		1.0094	12.18
1.0102	168.86		1.0102	26.53		1.0102	12.2
1.011	168.73		1.01099	26.45		1.011	12.22
1.0118	168.58		1.01179	26.37		1.0118	12.24
1.0126	168.43		1.01259	26.29		1.0126	12.26
1.0134	168.29		1.01338	26.22		1.0134	12.28
1.0142	168.17		1.01418	26.15		1.0142	12.29
1.015	168.06		1.01498	26.08		1.015	12.3
1.0158	167.95		1.01577	26.01		1.0158	12.32
1.0166	167.82		1.01657	25.95		1.0166	12.34
1.0174	167.67		1.01737	25.89		1.0174	12.35
1.0182	167.53		1.01816	25.83		1.0182	12.37
1.019	167.4		1.01896	25.77		1.019	12.39
1.0198	167.3		1.01976	25.71		1.0198	12.4
1.0206	167.23		1.02055	25.65		1.0206	12.41
1.0214	167.18		1.02135	25.59		1.0214	12.42
1.0221	167.15		1.02215	25.54		1.0221	12.43
1.0229	167.13		1.02294	25.49		1.0229	12.45
1.0237	167.11		1.02374	25.43		1.0237	12.47
1.0245	167.09		1.02454	25.37		1.0245	12.49
1.0253	167.07		1.02533	25.32		1.0253	12.5
1.0261	167.03		1.02613	25.27		1.0261	12.51
1.0269	167.01		1.02693	25.22		1.0269	12.52
1.0277	166.99		1.02772	25.17		1.0277	12.52
1.0285	166.96		1.02852	25.12		1.0285	12.52
1.0293	166.93		1.02932	25.07		1.0293	12.52
1.0301	166.89		1.03011	25.02		1.0301	12.52
1.0309	166.87		1.03091	24.97		1.0309	12.53
1.0317	166.85		1.03171	24.91		1.0317	12.54
1.0325	166.87		1.0325	24.86		1.0325	12.55
1.0333	166.91		1.0333	24.81		1.0333	12.56
1.0341	166.95		1.0341	24.76		1.0341	12.57
1.0349	166.99		1.03489	24.71		1.0349	12.58
1.0357	167.06		1.03569	24.66		1.0357	12.59
1.0365	167.15		1.03649	24.61		1.0365	12.59
1.0373	167.25		1.03728	24.56		1.0373	12.59
1.0381	167.36		1.03808	24.51		1.0381	12.61
1.0389	167.46		1.03888	24.46		1.0389	12.62
1.0397	167.55		1.03967	24.41		1.0397	12.64
1.0405	167.63		1.04047	24.36		1.0405	12.66
1.0413	167.7		1.04127	24.31		1.0413	12.68
1.0421	167.75		1.04207	24.26		1.0421	12.7
1.0429	167.79		1.04286	24.2		1.0429	12.72
1.0437	167.82		1.04366	24.14		1.0437	12.74
1.0445	167.85		1.04446	24.08		1.0445	12.75
1.0453	167.89		1.04525	24.03		1.0453	12.76
1.046	167.91		1.04605	23.98		1.046	12.77
1.0468	167.92		1.04685	23.94		1.0468	12.79
1.0476	167.94		1.04764	23.92		1.0476	12.81
1.0484	167.96		1.04844	23.91		1.0484	12.84
1.0492	167.97		1.04924	23.9		1.0492	12.87
1.05	167.98		1.05003	23.89		1.05	12.91
1.0508	168		1.05083	23.88		1.0508	12.95
1.0516	168		1.05163	23.85		1.0516	12.99
1.0524	167.99		1.05242	23.82		1.0524	13.03
1.0532	167.97		1.05322	23.78		1.0532	13.07
1.054	167.92		1.05402	23.74		1.054	13.1
1.0548	167.88		1.05481	23.7		1.0548	13.12
1.0556	167.82		1.05561	23.67		1.0556	13.12
1.0564	167.76		1.05641	23.65		1.0564	13.11
1.0572	167.68		1.0572	23.64		1.0572	13.1
1.058	167.57		1.058	23.64		1.058	13.1
1.0588	167.43		1.0588	23.64		1.0588	13.09
1.0596	167.3		1.05959	23.63		1.0596	13.09
1.0604	167.18		1.06039	23.62		1.0604	13.09
1.0612	167.07		1.06119	23.61		1.0612	13.08
1.062	166.95		1.06198	23.61		1.062	13.07
1.0628	166.84		1.06278	23.62		1.0628	13.04
1.0636	166.73		1.06358	23.62		1.0636	13
1.0644	166.61		1.06437	23.62		1.0644	12.96
1.0652	166.5		1.06517	23.62		1.0652	12.93
1.066	166.39		1.06597	23.63		1.066	12.91
1.0668	166.26		1.06676	23.64		1.0668	12.89
1.0676	166.1		1.06756	23.66		1.0676	12.88
1.0684	165.94		1.06836	23.68		1.0684	12.86
1.0692	165.78		1.06915	23.7		1.0692	12.84
1.0699	165.65		1.06995	23.72		1.0699	12.8
1.0707	165.53		1.07075	23.74		1.0707	12.76
1.0715	165.43		1.07154	23.75		1.0715	12.72
1.0723	165.32		1.07234	23.76		1.0723	12.68
1.0731	165.2		1.07314	23.77		1.0731	12.65
1.0739	165.08		1.07393	23.78		1.0739	12.63
1.0747	164.93		1.07473	23.79		1.0747	12.63
1.0755	164.77		1.07553	23.8		1.0755	12.63
1.0763	164.63		1.07632	23.81		1.0763	12.62
1.0771	164.52		1.07712	23.81		1.0771	12.61
1.0779	164.42		1.07792	23.82		1.0779	12.59
1.0787	164.35		1.07871	23.83		1.0787	12.58
1.0795	164.28		1.07951	23.84		1.0795	12.59
1.0803	164.21		1.08031	23.85		1.0803	12.61
1.0811	164.15		1.0811	23.86		1.0811	12.64
1.0819	164.11		1.0819	23.87		1.0819	12.66
1.0827	164.08		1.0827	23.88		1.0827	12.68
1.0835	164.06		1.08349	23.88		1.0835	12.68
1.0843	164.05		1.08429	23.88		1.0843	12.68
1.0851	164.05		1.08509	23.88		1.0851	12.7
1.0859	164.06		1.08588	23.88		1.0859	12.73
1.0867	164.08		1.08668	23.89		1.0867	12.77
1.0875	164.09		1.08748	23.9		1.0875	12.8
1.0883	164.11		1.08827	23.91		1.0883	12.82
1.0891	164.13		1.08907	23.92		1.0891	12.83
1.0899	164.14		1.08987	23.92		1.0899	12.82
1.0907	164.18		1.09066	23.92		1.0907	12.81
1.0915	164.24		1.09146	23.92		1.0915	12.81
1.0923	164.29		1.09226	23.92		1.0923	12.79
1.0931	164.33		1.09305	23.92		1.0931	12.78
1.0938	164.37		1.09385	23.92		1.0938	12.76
1.0946	164.4		1.09465	23.92		1.0946	12.74
1.0954	164.44		1.09544	23.92		1.0954	12.72
1.0962	164.48		1.09624	23.93		1.0962	12.69
1.097	164.52		1.09704	23.93		1.097	12.67
1.0978	164.55		1.09783	23.93		1.0978	12.65
1.0986	164.59		1.09863	23.93		1.0986	12.63
1.0994	164.62		1.09943	23.93		1.0994	12.62
1.1002	164.62		1.10022	23.93		1.1002	12.6
1.101	164.58		1.10102	23.94		1.101	12.58
1.1018	164.51		1.10182	23.95		1.1018	12.56
1.1026	164.41		1.10261	23.97		1.1026	12.54
1.1034	164.3		1.10341	23.99		1.1034	12.52
1.1042	164.17		1.10421	24.01		1.1042	12.5
1.105	164.02		1.105	24.02		1.105	12.5
1.1058	163.88		1.1058	24.02		1.1058	12.5
1.1066	163.74		1.1066	24.01		1.1066	12.5
1.1074	163.62		1.10739	24.01		1.1074	12.5
1.1082	163.52		1.10819	24.01		1.1082	12.5
1.109	163.44		1.10899	24.01		1.109	12.51
1.1098	163.37		1.10978	24.02		1.1098	12.53
1.1106	163.28		1.11058	24.03		1.1106	12.54
1.1114	163.2		1.11138	24.05		1.1114	12.55
1.1122	163.1		1.11217	24.06		1.1122	12.55
1.113	162.99		1.11297	24.07		1.113	12.55
1.1138	162.88		1.11377	24.07		1.1138	12.54
1.1146	162.76		1.11456	24.07		1.1146	12.54
1.1154	162.63		1.11536	24.05		1.1154	12.54
1.1162	162.51		1.11616	24.03		1.1162	12.54
1.117	162.41		1.11695	24.01		1.117	12.54
1.1178	162.3		1.11775	24		1.1178	12.52
1.1185	162.19		1.11855	23.99		1.1185	12.5
1.1193	162.09		1.11934	23.98		1.1193	12.48
1.1201	161.99		1.12014	23.97		1.1201	12.45
1.1209	161.88		1.12094	23.97		1.1209	12.43
1.1217	161.76		1.12173	23.97		1.1217	12.4
1.1225	161.63		1.12253	23.97		1.1225	12.37
1.1233	161.52		1.12333	23.97		1.1233	12.34
1.1241	161.41		1.12412	23.97		1.1241	12.32
1.1249	161.32		1.12492	23.97		1.1249	12.31
1.1257	161.25		1.12572	23.97		1.1257	12.3
1.1265	161.17		1.12651	23.97		1.1265	12.28
1.1273	161.07		1.12731	23.96		1.1273	12.26
1.1281	160.96		1.12811	23.95		1.1281	12.23
1.1289	160.86		1.1289	23.94		1.1289	12.2
1.1297	160.77		1.1297	23.93		1.1297	12.16
1.1305	160.69		1.1305	23.92		1.1305	12.11
1.1313	160.62		1.13129	23.92		1.1313	12.06
1.1321	160.55		1.13209	23.92		1.1321	12
1.1329	160.49		1.13289	23.93		1.1329	11.92
1.1337	160.46		1.13368	23.94		1.1337	11.85
1.1345	160.44		1.13448	23.95		1.1345	11.78
1.1353	160.44		1.13528	23.95		1.1353	11.74
1.1361	160.46		1.13607	23.95		1.1361	11.71
1.1369	160.5		1.13687	23.94		1.1369	11.68
1.1377	160.56		1.13767	23.92		1.1377	11.64
1.1385	160.64		1.13846	23.9		1.1385	11.61
1.1393	160.71		1.13926	23.88		1.1393	11.56
1.1401	160.75		1.14006	23.86		1.1401	11.51
1.1409	160.76		1.14085	23.85		1.1409	11.46
1.1417	160.75		1.14165	23.83		1.1417	11.42
1.1424	160.72		1.14245	23.81		1.1424	11.38
1.1432	160.69		1.14324	23.8		1.1432	11.36
1.144	160.67		1.14404	23.79		1.144	11.34
1.1448	160.66		1.14484	23.78		1.1448	11.32
1.1456	160.67		1.14563	23.77		1.1456	11.31
1.1464	160.71		1.14643	23.77		1.1464	11.29
1.1472	160.76		1.14723	23.78		1.1472	11.25
1.148	160.8		1.14802	23.79		1.148	11.21
1.1488	160.84		1.14882	23.79		1.1488	11.18
1.1496	160.87		1.14962	23.78		1.1496	11.16
1.1504	160.89		1.15041	23.76		1.1504	11.13
1.1512	160.9		1.15121	23.74		1.1512	11.09
1.152	160.94		1.15201	23.72		1.152	11.05
1.1528	160.98		1.1528	23.7		1.1528	11.01
1.1536	161.01		1.1536	23.69		1.1536	10.97
1.1544	161.04		1.1544	23.68		1.1544	10.92
1.1552	161.06		1.15519	23.67		1.1552	10.87
1.156	161.07		1.15599	23.66		1.156	10.81
1.1568	161.07		1.15679	23.67		1.1568	10.74
1.1576	161.06		1.15758	23.68		1.1576	10.67
1.1584	161.04		1.15838	23.68		1.1584	10.59
1.1592	161.01		1.15918	23.68		1.1592	10.5
1.16	160.97		1.15997	23.68		1.16	10.41
1.1608	160.93		1.16077	23.68		1.1608	10.31
1.1616	160.88		1.16157	23.67		1.1616	10.23
1.1624	160.83		1.16236	23.65		1.1624	10.15
1.1632	160.79		1.16316	23.63		1.1632	10.07
1.164	160.74		1.16396	23.61		1.164	10
1.1648	160.7		1.16475	23.59		1.1648	9.93
1.1656	160.64		1.16555	23.58		1.1656	9.87
1.1663	160.56		1.16635	23.56		1.1663	9.81
1.1671	160.46		1.16714	23.54		1.1671	9.76
1.1679	160.35		1.16794	23.52		1.1679	9.71
1.1687	160.25		1.16874	23.5		1.1687	9.66
1.1695	160.18		1.16953	23.49		1.1695	9.62
1.1703	160.13		1.17033	23.48		1.1703	9.58
1.1711	160.08		1.17113	23.48		1.1711	9.53
1.1719	160.05		1.17192	23.48		1.1719	9.5
1.1727	160.03		1.17272	23.47		1.1727	9.47
1.1735	159.99		1.17352	23.47		1.1735	9.45
1.1743	159.94		1.17431	23.46		1.1743	9.43
1.1751	159.87		1.17511	23.46		1.1751	9.41
1.1759	159.81		1.17591	23.44		1.1759	9.4
1.1767	159.76		1.1767	23.43		1.1767	9.39
1.1775	159.71		1.1775	23.43		1.1775	9.38
1.1783	159.65		1.1783	23.43		1.1783	9.37
1.1791	159.59		1.17909	23.44		1.1791	9.36
1.1799	159.56		1.17989	23.45		1.1799	9.36
1.1807	159.56		1.18069	23.45		1.1807	9.36
1.1815	159.57		1.18149	23.45		1.1815	9.36
1.1823	159.58		1.18228	23.43		1.1823	9.36
1.1831	159.58		1.18308	23.41		1.1831	9.35
1.1839	159.58		1.18388	23.38		1.1839	9.34
1.1847	159.6		1.18467	23.36		1.1847	9.32
1.1855	159.63		1.18547	23.35		1.1855	9.3
1.1863	159.68		1.18627	23.35		1.1863	9.28
1.1871	159.75		1.18706	23.34		1.1871	9.26
1.1879	159.84		1.18786	23.33		1.1879	9.24
1.1887	159.93		1.18866	23.32		1.1887	9.21
1.1895	160.02		1.18945	23.3		1.1895	9.17
1.1902	160.1		1.19025	23.28		1.1902	9.13
1.191	160.16		1.19105	23.26		1.191	9.09
1.1918	160.23		1.19184	23.24		1.1918	9.06
1.1926	160.31		1.19264	23.22		1.1926	9.03
1.1934	160.37		1.19344	23.21		1.1934	9.02
1.1942	160.42		1.19423	23.2		1.1942	9.01
1.195	160.45		1.19503	23.2		1.195	9
1.1958	160.47		1.19583	23.2		1.1958	8.99
1.1966	160.46		1.19662	23.2		1.1966	8.97
1.1974	160.46		1.19742	23.19		1.1974	8.96
1.1982	160.45		1.19822	23.18		1.1982	8.95
1.199	160.43		1.19901	23.17		1.199	8.94
1.1998	160.41		1.19981	23.16		1.1998	8.94
1.2006	160.41		1.20061	23.15		1.2006	8.93
1.2014	160.42		1.2014	23.14		1.2014	8.93
1.2022	160.44		1.2022	23.13		1.2022	8.93
1.203	160.44		1.203	23.12		1.203	8.94
1.2038	160.43		1.20379	23.11		1.2038	8.95
1.2046	160.4		1.20459	23.1		1.2046	8.94
1.2054	160.34		1.20539	23.09		1.2054	8.93
1.2062	160.29		1.20618	23.08		1.2062	8.92
1.207	160.26		1.20698	23.07		1.207	8.91
1.2078	160.23		1.20778	23.06		1.2078	8.9
1.2086	160.17		1.20857	23.06		1.2086	8.89
1.2094	160.08		1.20937	23.06		1.2094	8.88
1.2102	159.97		1.21017	23.06		1.2102	8.88
1.211	159.86		1.21096	23.06		1.211	8.88
1.2118	159.76		1.21176	23.06		1.2118	8.88
1.2126	159.66		1.21256	23.05		1.2126	8.89
1.2134	159.57		1.21335	23.04		1.2134	8.9
1.2141	159.47		1.21415	23.03		1.2141	8.92
1.2149	159.37		1.21495	23.03		1.2149	8.92
1.2157	159.28		1.21574	23.03		1.2157	8.93
1.2165	159.2		1.21654	23.03		1.2165	8.94
1.2173	159.12		1.21734	23.03		1.2173	8.94
1.2181	159.03		1.21813	23.03		1.2181	8.93
1.2189	158.95		1.21893	23.03		1.2189	8.93
1.2197	158.9		1.21973	23.03		1.2197	8.94
1.2205	158.87		1.22052	23.03		1.2205	8.95
1.2213	158.85		1.22132	23.03		1.2213	8.95
1.2221	158.83		1.22212	23.04		1.2221	8.95
1.2229	158.8		1.22291	23.04		1.2229	8.94
1.2237	158.76		1.22371	23.04		1.2237	8.93
1.2245	158.71		1.22451	23.05		1.2245	8.91
1.2253	158.65		1.2253	23.05		1.2253	8.89
1.2261	158.59		1.2261	23.04		1.2261	8.88
1.2269	158.53		1.2269	23.02		1.2269	8.9
1.2277	158.48		1.22769	23		1.2277	8.92
1.2285	158.43		1.22849	22.99		1.2285	8.94
1.2293	158.38		1.22929	22.99		1.2293	8.96
1.2301	158.34		1.23008	23		1.2301	8.98
1.2309	158.31		1.23088	23.02		1.2309	9.01
1.2317	158.27		1.23168	23.03		1.2317	9.04
1.2325	158.24		1.23247	23.04		1.2325	9.07
1.2333	158.23		1.23327	23.04		1.2333	9.1
1.2341	158.23		1.23407	23.04		1.2341	9.13
1.2349	158.23		1.23486	23.04		1.2349	9.16
1.2357	158.23		1.23566	23.04		1.2357	9.2
1.2365	158.22		1.23646	23.03		1.2365	9.24
1.2373	158.22		1.23725	23.01		1.2373	9.28
1.238	158.23		1.23805	23		1.238	9.32
1.2388	158.25		1.23885	22.99		1.2388	9.36
1.2396	158.29		1.23964	22.98		1.2396	9.4
1.2404	158.32		1.24044	22.98		1.2404	9.44
1.2412	158.34		1.24124	22.99		1.2412	9.46
1.242	158.33		1.24203	23.02		1.242	9.49
1.2428	158.3		1.24283	23.05		1.2428	9.53
1.2436	158.29		1.24363	23.09		1.2436	9.57
1.2444	158.29		1.24442	23.13		1.2444	9.62
1.2452	158.33		1.24522	23.17		1.2452	9.66
1.246	158.39		1.24602	23.22		1.246	9.71
1.2468	158.48		1.24681	23.27		1.2468	9.76
1.2476	158.58		1.24761	23.32		1.2476	9.81
1.2484	158.68		1.24841	23.36		1.2484	9.85
1.2492	158.76		1.2492	23.39		1.2492	9.88
1.25	158.82		1.25	23.41		1.25	9.91
1.2508	158.86		1.2508	23.43		1.2508	9.94
1.2516	158.88		1.25159	23.44		1.2516	9.97
1.2524	158.9		1.25239	23.46		1.2524	10
1.2532	158.94		1.25319	23.47		1.2532	10.03
1.254	158.99		1.25398	23.5		1.254	10.05
1.2548	159.04		1.25478	23.53		1.2548	10.06
1.2556	159.05		1.25558	23.58		1.2556	10.07
1.2564	159.04		1.25637	23.65		1.2564	10.08
1.2572	159.03		1.25717	23.71		1.2572	10.09
1.258	159.02		1.25797	23.77		1.258	10.1
1.2588	159.02		1.25876	23.81		1.2588	10.1
1.2596	159.01		1.25956	23.85		1.2596	10.1
1.2604	158.98		1.26036	23.88		1.2604	10.1
1.2612	158.94		1.26115	23.9		1.2612	10.1
1.262	158.9		1.26195	23.92		1.262	10.1
1.2627	158.87		1.26275	23.93		1.2627	10.11
1.2635	158.86		1.26354	23.95		1.2635	10.12
1.2643	158.85		1.26434	23.97		1.2643	10.14
1.2651	158.85		1.26514	23.98		1.2651	10.16
1.2659	158.84		1.26593	23.99		1.2659	10.18
1.2667	158.8		1.26673	24		1.2667	10.2
1.2675	158.75		1.26753	24.02		1.2675	10.22
1.2683	158.7		1.26832	24.04		1.2683	10.23
1.2691	158.67		1.26912	24.07		1.2691	10.24
1.2699	158.66		1.26992	24.09		1.2699	10.25
1.2707	158.66		1.27071	24.11		1.2707	10.26
1.2715	158.62		1.27151	24.13		1.2715	10.27
1.2723	158.56		1.27231	24.15		1.2723	10.28
1.2731	158.49		1.2731	24.17		1.2731	10.28
1.2739	158.44		1.2739	24.19		1.2739	10.28
1.2747	158.41		1.2747	24.21		1.2747	10.28
1.2755	158.39		1.27549	24.23		1.2755	10.28
1.2763	158.39		1.27629	24.25		1.2763	10.29
1.2771	158.41		1.27709	24.27		1.2771	10.29
1.2779	158.45		1.27788	24.29		1.2779	10.3
1.2787	158.5		1.27868	24.31		1.2787	10.31
1.2795	158.57		1.27948	24.33		1.2795	10.31
1.2803	158.63		1.28027	24.33		1.2803	10.31
1.2811	158.69		1.28107	24.33		1.2811	10.31
1.2819	158.73		1.28187	24.33		1.2819	10.31
1.2827	158.75		1.28266	24.34		1.2827	10.3
1.2835	158.75		1.28346	24.35		1.2835	10.3
1.2843	158.74		1.28426	24.36		1.2843	10.31
1.2851	158.76		1.28505	24.38		1.2851	10.32
1.2859	158.78		1.28585	24.41		1.2859	10.33
1.2866	158.81		1.28665	24.45		1.2866	10.35
1.2874	158.85		1.28744	24.49		1.2874	10.37
1.2882	158.91		1.28824	24.53		1.2882	10.39
1.289	158.98		1.28904	24.57		1.289	10.41
1.2898	159.06		1.28983	24.62		1.2898	10.43
1.2906	159.15		1.29063	24.67		1.2906	10.45
1.2914	159.23		1.29143	24.71		1.2914	10.47
1.2922	159.3		1.29222	24.76		1.2922	10.48
1.293	159.34		1.29302	24.79		1.293	10.49
1.2938	159.37		1.29382	24.81		1.2938	10.49
1.2946	159.38		1.29461	24.81		1.2946	10.5
1.2954	159.36		1.29541	24.81		1.2954	10.5
1.2962	159.33		1.29621	24.81		1.2962	10.5
1.297	159.31		1.297	24.81		1.297	10.51
1.2978	159.31		1.2978	24.8		1.2978	10.52
1.2986	159.31		1.2986	24.79		1.2986	10.53
1.2994	159.3		1.29939	24.78		1.2994	10.53
1.3002	159.29		1.30019	24.76		1.3002	10.54
1.301	159.28		1.30099	24.74		1.301	10.55
1.3018	159.27		1.30178	24.71		1.3018	10.56
1.3026	159.27		1.30258	24.68		1.3026	10.58
1.3034	159.28		1.30338	24.65		1.3034	10.61
1.3042	159.28		1.30417	24.62		1.3042	10.64
1.305	159.28		1.30497	24.59		1.305	10.66
1.3058	159.28		1.30577	24.56		1.3058	10.69
1.3066	159.29		1.30656	24.52		1.3066	10.7
1.3074	159.32		1.30736	24.48		1.3074	10.71
1.3082	159.37		1.30816	24.44		1.3082	10.71
1.309	159.44		1.30895	24.4		1.309	10.71
1.3098	159.5		1.30975	24.36		1.3098	10.72
1.3105	159.55		1.31055	24.32		1.3105	10.74
1.3113	159.58		1.31134	24.29		1.3113	10.76
1.3121	159.57		1.31214	24.26		1.3121	10.77
1.3129	159.53		1.31294	24.23		1.3129	10.78
1.3137	159.48		1.31373	24.2		1.3137	10.78
1.3145	159.45		1.31453	24.18		1.3145	10.78
1.3153	159.43		1.31533	24.16		1.3153	10.78
1.3161	159.42		1.31612	24.14		1.3161	10.78
1.3169	159.39		1.31692	24.13		1.3169	10.77
1.3177	159.37		1.31772	24.12		1.3177	10.76
1.3185	159.36		1.31851	24.11		1.3185	10.75
1.3193	159.34		1.31931	24.09		1.3193	10.74
1.3201	159.32		1.32011	24.06		1.3201	10.74
1.3209	159.31		1.32091	24.02		1.3209	10.75
1.3217	159.33		1.3217	23.97		1.3217	10.75
1.3225	159.38		1.3225	23.92		1.3225	10.75
1.3233	159.44		1.3233	23.87		1.3233	10.75
1.3241	159.49		1.32409	23.83		1.3241	10.74
1.3249	159.5		1.32489	23.79		1.3249	10.74
1.3257	159.49		1.32569	23.76		1.3257	10.73
1.3265	159.45		1.32648	23.73		1.3265	10.72
1.3273	159.39		1.32728	23.7		1.3273	10.71
1.3281	159.33		1.32808	23.67		1.3281	10.71
1.3289	159.28		1.32887	23.65		1.3289	10.71
1.3297	159.21		1.32967	23.64		1.3297	10.71
1.3305	159.13		1.33047	23.63		1.3305	10.72
1.3313	159.05		1.33126	23.63		1.3313	10.73
1.3321	158.97		1.33206	23.63		1.3321	10.74
1.3329	158.9		1.33286	23.64		1.3329	10.76
1.3337	158.84		1.33365	23.65		1.3337	10.78
1.3344	158.79		1.33445	23.66		1.3344	10.81
1.3352	158.8		1.33525	23.67		1.3352	10.84
1.336	158.82		1.33604	23.66		1.336	10.87
1.3368	158.85		1.33684	23.64		1.3368	10.9
1.3376	158.88		1.33764	23.62		1.3376	10.93
1.3384	158.89		1.33843	23.61		1.3384	10.98
1.3392	158.89		1.33923	23.6		1.3392	11.03
1.34	158.88		1.34003	23.6		1.34	11.08
1.3408	158.88		1.34082	23.6		1.3408	11.12
1.3416	158.88		1.34162	23.59		1.3416	11.16
1.3424	158.89		1.34242	23.59		1.3424	11.19
1.3432	158.89		1.34321	23.58		1.3432	11.22
1.344	158.89		1.34401	23.57		1.344	11.24
1.3448	158.89		1.34481	23.57		1.3448	11.26
1.3456	158.89		1.3456	23.57		1.3456	11.28
1.3464	158.92		1.3464	23.58		1.3464	11.29
1.3472	158.92		1.3472	23.58		1.3472	11.3
1.348	158.88		1.34799	23.57		1.348	11.32
1.3488	158.82		1.34879	23.55		1.3488	11.35
1.3496	158.74		1.34959	23.54		1.3496	11.38
1.3504	158.66		1.35038	23.52		1.3504	11.41
1.3512	158.61		1.35118	23.49		1.3512	11.43
1.352	158.56		1.35198	23.46		1.352	11.45
1.3528	158.53		1.35277	23.43		1.3528	11.47
1.3536	158.49		1.35357	23.4		1.3536	11.49
1.3544	158.46		1.35437	23.37		1.3544	11.51
1.3552	158.43		1.35516	23.34		1.3552	11.53
1.356	158.4		1.35596	23.3		1.356	11.55
1.3568	158.36		1.35676	23.27		1.3568	11.58
1.3576	158.31		1.35755	23.25		1.3576	11.6
1.3583	158.28		1.35835	23.25		1.3583	11.62
1.3591	158.25		1.35915	23.27		1.3591	11.64
1.3599	158.22		1.35994	23.31		1.3599	11.66
1.3607	158.18		1.36074	23.36		1.3607	11.68
1.3615	158.16		1.36154	23.42		1.3615	11.7
1.3623	158.16		1.36233	23.46		1.3623	11.73
1.3631	158.18		1.36313	23.5		1.3631	11.75
1.3639	158.21		1.36393	23.54		1.3639	11.77
1.3647	158.23		1.36472	23.57		1.3647	11.8
1.3655	158.26		1.36552	23.6		1.3655	11.84
1.3663	158.27		1.36632	23.63		1.3663	11.88
1.3671	158.29		1.36711	23.66		1.3671	11.92
1.3679	158.33		1.36791	23.68		1.3679	11.96
1.3687	158.38		1.36871	23.7		1.3687	12
1.3695	158.43		1.3695	23.71		1.3695	12.06
1.3703	158.47		1.3703	23.72		1.3703	12.12
1.3711	158.51		1.3711	23.73		1.3711	12.19
1.3719	158.54		1.37189	23.74		1.3719	12.27
1.3727	158.59		1.37269	23.77		1.3727	12.34
1.3735	158.64		1.37349	23.8		1.3735	12.41
1.3743	158.69		1.37428	23.85		1.3743	12.47
1.3751	158.73		1.37508	23.89		1.3751	12.53
1.3759	158.75		1.37588	23.92		1.3759	12.59
1.3767	158.75		1.37667	23.95		1.3767	12.65
1.3775	158.74		1.37747	23.98		1.3775	12.7
1.3783	158.74		1.37827	24.02		1.3783	12.75
1.3791	158.76		1.37906	24.06		1.3791	12.8
1.3799	158.79		1.37986	24.11		1.3799	12.84
1.3807	158.84		1.38066	24.16		1.3807	12.88
1.3815	158.91		1.38145	24.22		1.3815	12.92
1.3822	158.97		1.38225	24.27		1.3822	12.95
1.383	159.02		1.38305	24.31		1.383	12.97
1.3838	159.06		1.38384	24.33		1.3838	12.98
1.3846	159.09		1.38464	24.35		1.3846	12.99
1.3854	159.11		1.38544	24.37		1.3854	12.99
1.3862	159.14		1.38623	24.4		1.3862	12.99
1.387	159.16		1.38703	24.44		1.387	13
1.3878	159.17		1.38783	24.48		1.3878	13.01
1.3886	159.17		1.38862	24.52		1.3886	13.02
1.3894	159.17		1.38942	24.56		1.3894	13.03
1.3902	159.16		1.39022	24.61		1.3902	13.03
1.391	159.16		1.39101	24.67		1.391	13.03
1.3918	159.19		1.39181	24.73		1.3918	13.05
1.3926	159.26		1.39261	24.79		1.3926	13.06
1.3934	159.35		1.3934	24.86		1.3934	13.07
1.3942	159.43		1.3942	24.92		1.3942	13.07
1.395	159.5		1.395	24.99		1.395	13.07
1.3958	159.55		1.39579	25.06		1.3958	13.08
1.3966	159.61		1.39659	25.13		1.3966	13.1
1.3974	159.65		1.39739	25.2		1.3974	13.12
1.3982	159.68		1.39818	25.27		1.3982	13.14
1.399	159.72		1.39898	25.34		1.399	13.15
1.3998	159.78		1.39978	25.4		1.3998	13.15
1.4006	159.84		1.40057	25.45		1.4006	13.14
1.4014	159.88		1.40137	25.49		1.4014	13.13
1.4022	159.91		1.40217	25.52		1.4022	13.12
1.403	159.92		1.40296	25.54		1.403	13.11
1.4038	159.92		1.40376	25.56		1.4038	13.1
1.4046	159.92		1.40456	25.58		1.4046	13.09
1.4054	159.93		1.40535	25.59		1.4054	13.08
1.4062	159.96		1.40615	25.61		1.4062	13.08
1.4069	159.99		1.40695	25.62		1.4069	13.09
1.4077	160		1.40774	25.64		1.4077	13.1
1.4085	159.99		1.40854	25.66		1.4085	13.1
1.4093	159.97		1.40934	25.67		1.4093	13.11
1.4101	159.94		1.41013	25.68		1.4101	13.11
1.4109	159.91		1.41093	25.69		1.4109	13.11
1.4117	159.89		1.41173	25.7		1.4117	13.11
1.4125	159.85		1.41252	25.71		1.4125	13.1
1.4133	159.81		1.41332	25.72		1.4133	13.1
1.4141	159.78		1.41412	25.73		1.4141	13.09
1.4149	159.75		1.41491	25.73		1.4149	13.07
1.4157	159.73		1.41571	25.73		1.4157	13.05
1.4165	159.71		1.41651	25.73		1.4165	13.03
1.4173	159.68		1.4173	25.73		1.4173	13.01
1.4181	159.64		1.4181	25.72		1.4181	12.97
1.4189	159.59		1.4189	25.7		1.4189	12.93
1.4197	159.55		1.41969	25.67		1.4197	12.88
1.4205	159.51		1.42049	25.65		1.4205	12.84
1.4213	159.48		1.42129	25.65		1.4213	12.8
1.4221	159.45		1.42208	25.65		1.4221	12.78
1.4229	159.44		1.42288	25.66		1.4229	12.76
1.4237	159.43		1.42368	25.67		1.4237	12.74
1.4245	159.41		1.42447	25.68		1.4245	12.71
1.4253	159.4		1.42527	25.67		1.4253	12.68
1.4261	159.39		1.42607	25.65		1.4261	12.66
1.4269	159.42		1.42686	25.63		1.4269	12.64
1.4277	159.5		1.42766	25.63		1.4277	12.62
1.4285	159.59		1.42846	25.63		1.4285	12.59
1.4293	159.68		1.42925	25.64		1.4293	12.56
1.4301	159.77		1.43005	25.66		1.4301	12.53
1.4308	159.86		1.43085	25.7		1.4308	12.51
1.4316	159.96		1.43164	25.75		1.4316	12.49
1.4324	160.07		1.43244	25.8		1.4324	12.47
1.4332	160.18		1.43324	25.86		1.4332	12.45
1.434	160.27		1.43403	25.93		1.434	12.43
1.4348	160.36		1.43483	26		1.4348	12.41
1.4356	160.44		1.43563	26.08		1.4356	12.39
1.4364	160.52		1.43642	26.15		1.4364	12.37
1.4372	160.6		1.43722	26.2		1.4372	12.35
1.438	160.67		1.43802	26.23		1.438	12.32
1.4388	160.74		1.43881	26.23		1.4388	12.29
1.4396	160.81		1.43961	26.21		1.4396	12.26
1.4404	160.88		1.44041	26.18		1.4404	12.22
1.4412	160.96		1.4412	26.14		1.4412	12.18
1.442	161.04		1.442	26.12		1.442	12.14
1.4428	161.12		1.4428	26.1		1.4428	12.1
1.4436	161.18		1.44359	26.08		1.4436	12.06
1.4444	161.22		1.44439	26.07		1.4444	12.01
1.4452	161.25		1.44519	26.06		1.4452	11.95
1.446	161.27		1.44598	26.05		1.446	11.88
1.4468	161.27		1.44678	26.03		1.4468	11.81
1.4476	161.25		1.44758	26		1.4476	11.74
1.4484	161.24		1.44837	25.96		1.4484	11.68
1.4492	161.24		1.44917	25.91		1.4492	11.6
1.45	161.24		1.44997	25.85		1.45	11.52
1.4508	161.25		1.45076	25.8		1.4508	11.43
1.4516	161.27		1.45156	25.75		1.4516	11.33
1.4524	161.27		1.45236	25.71		1.4524	11.24
1.4532	161.27		1.45315	25.68		1.4532	11.15
1.454	161.24		1.45395	25.65		1.454	11.08
1.4547	161.21		1.45475	25.63		1.4547	11.01
1.4555	161.17		1.45554	25.62		1.4555	10.94
1.4563	161.12		1.45634	25.61		1.4563	10.87
1.4571	161.07		1.45714	25.61		1.4571	10.81
1.4579	161.01		1.45793	25.62		1.4579	10.74
1.4587	160.95		1.45873	25.64		1.4587	10.67
1.4595	160.89		1.45953	25.65		1.4595	10.59
1.4603	160.82		1.46033	25.65		1.4603	10.51
1.4611	160.73		1.46112	25.64		1.4611	10.43
1.4619	160.63		1.46192	25.64		1.4619	10.35
1.4627	160.55		1.46272	25.65		1.4627	10.27
1.4635	160.5		1.46351	25.68		1.4635	10.2
1.4643	160.46		1.46431	25.71		1.4643	10.13
1.4651	160.43		1.46511	25.74		1.4651	10.06
1.4659	160.39		1.4659	25.78		1.4659	10
1.4667	160.35		1.4667	25.81		1.4667	9.94
1.4675	160.33		1.4675	25.84		1.4675	9.88
1.4683	160.33		1.46829	25.87		1.4683	9.83
1.4691	160.33		1.46909	25.91		1.4691	9.77
1.4699	160.34		1.46989	25.94		1.4699	9.72
1.4707	160.32		1.47068	25.97		1.4707	9.67
1.4715	160.28		1.47148	26		1.4715	9.63
1.4723	160.2		1.47228	26.02		1.4723	9.63
1.4731	160.12		1.47307	26.03		1.4731	9.66
1.4739	160.02		1.47387	26.03		1.4739	9.71
1.4747	159.92		1.47467	26.02		1.4747	9.75
1.4755	159.82		1.47546	26.02		1.4755	9.76
1.4763	159.71		1.47626	26.02		1.4763	9.74
1.4771	159.6		1.47706	26.02		1.4771	9.7
1.4779	159.51		1.47785	26.02		1.4779	9.66
1.4786	159.44		1.47865	26.02		1.4786	9.62
1.4794	159.38		1.47945	26.03		1.4794	9.58
1.4802	159.34		1.48024	26.04		1.4802	9.54
1.481	159.32		1.48104	26.06		1.481	9.51
1.4818	159.29		1.48184	26.09		1.4818	9.48
1.4826	159.26		1.48263	26.11		1.4826	9.46
1.4834	159.23		1.48343	26.11		1.4834	9.45
1.4842	159.21		1.48423	26.09		1.4842	9.46
1.485	159.19		1.48502	26.07		1.485	9.49
1.4858	159.15		1.48582	26.04		1.4858	9.53
1.4866	159.08		1.48662	26.02		1.4866	9.56
1.4874	159.01		1.48741	26.01		1.4874	9.57
1.4882	158.93		1.48821	26.01		1.4882	9.57
1.489	158.88		1.48901	26.04		1.489	9.55
1.4898	158.88		1.4898	26.08		1.4898	9.52
1.4906	158.92		1.4906	26.12		1.4906	9.49
1.4914	158.96		1.4914	26.16		1.4914	9.46
1.4922	159		1.49219	26.19		1.4922	9.43
1.493	159.02		1.49299	26.2		1.493	9.4
1.4938	159.02		1.49379	26.2		1.4938	9.38
1.4946	159		1.49458	26.2		1.4946	9.37
1.4954	158.97		1.49538	26.2		1.4954	9.37
1.4962	158.92		1.49618	26.22		1.4962	9.37
1.497	158.88		1.49697	26.24		1.497	9.37
1.4978	158.86		1.49777	26.26		1.4978	9.38
1.4986	158.87		1.49857	26.29		1.4986	9.38
1.4994	158.89		1.49936	26.32		1.4994	9.39
1.5002	158.92		1.50016	26.33		1.5002	9.4
1.501	158.96		1.50096	26.33		1.501	9.41
1.5018	159		1.50175	26.33		1.5018	9.41
1.5025	159.02		1.50255	26.32		1.5025	9.41
1.5033	159.02		1.50335	26.3		1.5033	9.41
1.5041	159		1.50414	26.27		1.5041	9.42
1.5049	158.95		1.50494	26.26		1.5049	9.43
1.5057	158.89		1.50574	26.24		1.5057	9.44
1.5065	158.8		1.50653	26.22		1.5065	9.45
1.5073	158.7		1.50733	26.19		1.5073	9.47
1.5081	158.6		1.50813	26.17		1.5081	9.49
1.5089	158.52		1.50892	26.14		1.5089	9.51
1.5097	158.45		1.50972	26.11		1.5097	9.54
1.5105	158.39		1.51052	26.07		1.5105	9.57
1.5113	158.32		1.51131	26.02		1.5113	9.6
1.5121	158.24		1.51211	25.97		1.5121	9.63
1.5129	158.17		1.51291	25.91		1.5129	9.67
1.5137	158.11		1.5137	25.85		1.5137	9.72
1.5145	158.05		1.5145	25.81		1.5145	9.77
1.5153	157.99		1.5153	25.78		1.5153	9.81
1.5161	157.93		1.51609	25.76		1.5161	9.84
1.5169	157.87		1.51689	25.76		1.5169	9.86
1.5177	157.79		1.51769	25.78		1.5177	9.88
1.5185	157.71		1.51848	25.82		1.5185	9.9
1.5193	157.63		1.51928	25.88		1.5193	9.92
1.5201	157.56		1.52008	25.94		1.5201	9.95
1.5209	157.48		1.52087	26		1.5209	9.98
1.5217	157.4		1.52167	26.05		1.5217	10.01
1.5225	157.31		1.52247	26.09		1.5225	10.04
1.5233	157.23		1.52326	26.12		1.5233	10.07
1.5241	157.16		1.52406	26.13		1.5241	10.1
1.5249	157.08		1.52486	26.12		1.5249	10.13
1.5257	157.03		1.52565	26.1		1.5257	10.16
1.5264	157.01		1.52645	26.1		1.5264	10.19
1.5272	157.01		1.52725	26.11		1.5272	10.22
1.528	157.01		1.52804	26.13		1.528	10.24
1.5288	157		1.52884	26.16		1.5288	10.26
1.5296	157		1.52964	26.22		1.5296	10.27
1.5304	157		1.53043	26.29		1.5304	10.28
1.5312	156.98		1.53123	26.36		1.5312	10.3
1.532	156.96		1.53203	26.42		1.532	10.32
1.5328	156.94		1.53282	26.48		1.5328	10.34
1.5336	156.97		1.53362	26.53		1.5336	10.35
1.5344	157.03		1.53442	26.58		1.5344	10.36
1.5352	157.14		1.53521	26.62		1.5352	10.38
1.536	157.3		1.53601	26.66		1.536	10.4
1.5368	157.47		1.53681	26.7		1.5368	10.42
1.5376	157.64		1.5376	26.73		1.5376	10.45
1.5384	157.8		1.5384	26.75		1.5384	10.48
1.5392	157.95		1.5392	26.77		1.5392	10.52
1.54	158.11		1.53999	26.8		1.54	10.55
1.5408	158.28		1.54079	26.83		1.5408	10.59
1.5416	158.47		1.54159	26.85		1.5416	10.63
1.5424	158.65		1.54238	26.86		1.5424	10.67
1.5432	158.81		1.54318	26.85		1.5432	10.7
1.544	158.96		1.54398	26.84		1.544	10.73
1.5448	159.1		1.54477	26.82		1.5448	10.76
1.5456	159.22		1.54557	26.78		1.5456	10.78
1.5464	159.34		1.54637	26.74		1.5464	10.8
1.5472	159.41		1.54716	26.69		1.5472	10.83
1.548	159.44		1.54796	26.63		1.548	10.85
1.5488	159.47		1.54876	26.56		1.5488	10.87
1.5496	159.51		1.54955	26.5		1.5496	10.89
1.5504	159.6		1.55035	26.44		1.5504	10.91
1.5511	159.73		1.55115	26.38		1.5511	10.92
1.5519	159.89		1.55194	26.33		1.5519	10.9
1.5527	160.05		1.55274	26.28		1.5527	10.86
1.5535	160.21		1.55354	26.24		1.5535	10.81
1.5543	160.37		1.55433	26.21		1.5543	10.77
1.5551	160.51		1.55513	26.17		1.5551	10.75
1.5559	160.66		1.55593	26.14		1.5559	10.77
1.5567	160.81		1.55672	26.11		1.5567	10.81
1.5575	160.93		1.55752	26.09		1.5575	10.85
1.5583	161.02		1.55832	26.09		1.5583	10.9
1.5591	161.1		1.55911	26.09		1.5591	10.94
1.5599	161.17		1.55991	26.1		1.5599	10.99
1.5607	161.23		1.56071	26.11		1.5607	11.03
1.5615	161.3		1.5615	26.12		1.5615	11.06
1.5623	161.37		1.5623	26.14		1.5623	11.09
1.5631	161.44		1.5631	26.18		1.5631	11.11
1.5639	161.52		1.56389	26.23		1.5639	11.12
1.5647	161.6		1.56469	26.28		1.5647	11.11
1.5655	161.71		1.56549	26.33		1.5655	11.08
1.5663	161.86		1.56628	26.37		1.5663	11.05
1.5671	162.02		1.56708	26.4		1.5671	11.04
1.5679	162.19		1.56788	26.42		1.5679	11.05
1.5687	162.33		1.56867	26.43		1.5687	11.08
1.5695	162.43		1.56947	26.43		1.5695	11.12
1.5703	162.49		1.57027	26.42		1.5703	11.16
1.5711	162.53		1.57106	26.4		1.5711	11.19
1.5719	162.57		1.57186	26.38		1.5719	11.22
1.5727	162.63		1.57266	26.37		1.5727	11.25
1.5735	162.69		1.57345	26.37		1.5735	11.28
1.5743	162.74		1.57425	26.37		1.5743	11.32
1.575	162.78		1.57505	26.37		1.575	11.36
1.5758	162.81		1.57584	26.37		1.5758	11.41
1.5766	162.83		1.57664	26.38		1.5766	11.46
1.5774	162.84		1.57744	26.4		1.5774	11.51
1.5782	162.83		1.57823	26.42		1.5782	11.55
1.579	162.83		1.57903	26.44		1.579	11.59
1.5798	162.82		1.57983	26.47		1.5798	11.63
1.5806	162.81		1.58062	26.5		1.5806	11.67
1.5814	162.8		1.58142	26.52		1.5814	11.71
1.5822	162.79		1.58222	26.54		1.5822	11.75
1.583	162.79		1.58301	26.57		1.583	11.79
1.5838	162.8		1.58381	26.6		1.5838	11.82
1.5846	162.81		1.58461	26.63		1.5846	11.85
1.5854	162.79		1.5854	26.67		1.5854	11.88
1.5862	162.75		1.5862	26.7		1.5862	11.91
1.587	162.68		1.587	26.73		1.587	11.92
1.5878	162.6		1.58779	26.74		1.5878	11.93
1.5886	162.51		1.58859	26.76		1.5886	11.94
1.5894	162.42		1.58939	26.79		1.5894	11.93
1.5902	162.32		1.59018	26.82		1.5902	11.92
[truncated: 27,443 more rows]

## Sheet: Images for 1F-1I
Participant:	Cau.														AA
Color:	D							W							D							W
Hair 1
Hair 2
Hair 3

## Sheet: 1F
Number of Granules (/μm2 *100)
Cau.		AA
D	W	D	W
16.5317	0.60011	18.0572	0
16.3578	0	17.0375	0.327061
15.4295	0.300055	13.2033	0.564353

## Sheet: 1G
Granule Size (μm2)
Cau.						AA
D			W			D			W
0.14	0.439	0.234	0.058	0	0.047	0.225	0.092	0.324	0.022	0.044	0.204
0.161	0.278	0.137				0.148	0.049	0.051	0.027		0.132
0.12	0.127	0.055				0.179	0.11	0.133			0.137
0.135	0.194	0.111				0.163	0.085	0.206			0.025
0.15	0.368	0.234				0.323	0.182	0.289
0.157	0.182	0.129				0.158	0.143	0.112
0.098	0.121	0.087				0.155	0.128	0.209
0.072	0.133	0.071				0.1	0.114	0.226
0.142	0.364	0.127				0.093	0.26	0.113
0.088	0.172	0.151				0.111	0.201	0.115
0.069	0.098	0.219				0.088	0.157	0.114
0.09	0.253	0.143				0.098	0.162	0.288
0.135	0.1	0.137				0.168	0.196	0.152
0.102	0.187	0.114				0.087	0.075	0.108
0.097	0.196	0.288				0.214	0.209	0.146
0.111	0.271	0.105				0.131	0.135	0.189
0.098	0.212	0.147				0.171	0.142	0.114
0.071	0.069	0.106				0.114	0.186	0.089
0.155	0.15	0.096				0.181	0.14	0.111
0.055	0.113	0.201				0.172	0.203	0.068
0.147	0.12	0.161				0.194	0.187	0.128
0.078	0.234	0.211				0.134	0.156	0.143
0.081	0.09	0.183				0.179	0.149	0.244
0.036	0.132	0.181				0.102	0.168	0.216
0.034	0.284	0.087				0.202	0.173	0.073
0.038	0.166	0.182				0.249	0.092	0.08
0.068	0.237	0.185				0.193	0.253	0.171
0.056	0.16	0.277				0.136	0.102	0.348
0.056	0.191	0.245				0.412	0.195	0.106
0.07	0.217	0.112				0.234	0.075	0.168
0.109	0.155	0.054				0.089	0.137	0.208
0.053	0.067	0.11				0.101	0.136	0.181
0.087	0.111	0.11				0.133	0.235	0.107
0.13	0.104	0.319				0.219	0.029	0.357
0.041	0.199	0.365				0.276	0.059	0.213
0.055	0.265	0.291				0.148	0.138	0.264
0.056	0.196	0.111				0.137	0.139	0.14
0.048	0.161	0.182				0.173	0.131	0.113
0.043	0.191	0.057				0.194	0.054	0.077
0.112	0.258	0.063				0.214	0.094	0.108
0.035	0.125	0.099				0.215	0.266	0.161
0.116	0.164	0.112				0.148	0.133	0.229
0.074	0.07	0.104				0.252	0.137	0.155
0.064	0.183	0.095				0.296	0.136	0.221
0.078	0.162	0.092				0.093	0.078	0.166
0.045	0.16	0.092				0.229	0.115	0.287
0.046	0.121	0.103				0.139	0.146	0.212
0.055	0.292	0.156				0.142	0.106	0.165
0.063	0.071	0.092				0.158	0.1	0.092
0.115	0.124	0.101				0.17	0.175	0.134
0.058	0.111	0.059				0.215	0.124
0.102	0.114	0.062				0.264	0.328
0.052	0.233	0.096				0.214	0.133
0.112	0.167	0.07				0.204	0.034
0.08	0.1	0.059				0.188
0.103	0.094	0.054				0.208
0.096	0.088					0.153
0.087	0.078					0.26
0.047	0.14					0.205
0.053						0.091
						0.182
						0.23
						0.13
						0.227
						0.154
						0.428
						0.13

## Sheet: 1H
Granule Intensity (A.U.)
Cau.						AA
D			W			D			W
167.206	107.701	161.824	70.422	70.422	86.6875	70.3097	46.5822	93.8646	42.5083	55.4828	88.7978
150.012	119.624	129.283			36.7735	115.976	48.8752	91.0866	25.2193		106.069
151.323	123.14	105.301				99.4357	54.4482	113.186			105.625
151.369	148.447	125.386				94.2627	51.2532	87.9776			62.5458
146.413	120.849	114.696				94.1417	52.9682	94.3426
156.717	111.516	145.573				78.6497	77.1212	76.4286
104.237	114.897	131.346				83.1017	64.2932	86.4446
108.896	108.89	121.229				78.7727	61.1992	99.1546
176.793	123.665	126.662				87.1757	63.0202	60.4716
168.651	121.757	91.203				91.2097	55.8082	79.7176
144.684	126.898	98.758				104.265	57.3252	114.519
138.262	150.925	154.353				71.4407	61.7022	94.0366
124.992	111.396	145.43				97.8677	68.3632	97.8626
137.953	114.461	134.645				96.2537	38.8882	82.1686
128.609	116.714	135.291				82.2017	51.5272	86.6266
116.253	133.888	82.859				96.4847	54.8732	91.2166
132.436	139.221	132.741				83.1217	40.7882	103.158
131.126	102.559	121.559				96.6607	50.1512	84.8666
148.125	125.572	122.938				85.0847	50.3342	78.5926
128.404	113.754	113.085				95.2877	51.1122	83.9336
132.353	115.146	142.796				117.538	47.1342	103.344
136.212	132.162	120.72				102.705	57.9342	65.4746
110.417	114.709	154.231				82.9677	85.7042	89.9966
101.691	118.128	135.555				77.7167	65.9562	84.0366
106.865	135.372	115.672				79.4527	59.2232	63.6426
105.162	104.142	121.145				91.6677	57.8512	82.8036
149.179	95.225	118.147				92.0127	56.4862	76.1266
146.225	92.789	131.883				91.6827	61.7802	85.4576
134.914	118.708	142.975				99.9357	66.8632	78.3676
109.183	118.228	135.361				64.8757	51.2242	75.5216
145.449	121.405	104.515				118.906	74.7692	70.6326
122.003	105.97	129.683				120.332	69.0092	75.0366
129.249	119.109	127.909				97.7687	63.1532	71.9726
140.236	112.123	121.24				80.6507	53.6922	83.0996
139.205	130.234	110.354				148.494	34.4892	87.4496
136.769	119.935	117.539				134.343	68.4272	82.9516
129.135	128.752	142.623				145.706	73.1892	80.1866
114	125.433	136.828				87.8927	68.4332	88.2046
135.615	120.188	123.191				87.0197	67.9152	57.9336
151.088	125.98	123.387				71.4237	73.7272	77.5806
159.112	128.748	111.487				73.1337	66.1762	79.6696
143.862	126.612	96.517				131.721	62.0542	85.1796
134.302	119.346	125.437				92.8487	62.0832	86.4786
135.65	132.338	130.799				92.0767	64.3272	83.5936
150.795	116.356	88.226				94.1597	61.1972	70.6256
122.585	129.041	109.236				80.0567	71.8972	65.1516
124.313	101.308	122.725				101.461	65.7242	120.665
146.7	114.109	123.435				124.095	61.7652	96.8796
131.245	109.834	107.877				111.071	59.8232	75.5096
115.933	109.974	93.389				90.6377	55.2372	47.9796
127.652	105.293	88.348				91.3457	44.5072
129.198	108.317	111.567				89.6487	63.4362
130.054	102.746	116.694				93.5737	57.4492
156.77	116.683	99.991				85.5937	53.8552
138.628	109.78	80.946				89.3737
174.038	80.405	94.458				106.137
142.101	82.296					116.265
141.813	93.298					131.695
118.011	95.267					104.291
116.066						107.283
						93.2767
						79.2227
						91.6517
						86.9437
						76.6817
						101.202
						158.56

## Sheet: 1I
Relative Intensity of cortex (A.U.)
Cau.		AA
D	W	D	W
0.46	0.33	0.62	0.92
0.56	1.04	0.58	0.96
0.56	0.62	0.78	0.81

## Sheet: Experiment 1 Raw Values
RAW DATA for all proteins detected in >75% of samples
Uniprot ID	Female - White emPAI Sample1_1	Female - White emPAI Sample1_2	Male - White emPAI Sample3_1	Male - White emPAI Sample3_2	avg female	avg male
SODC_HUMAN	0.31	0.31	0.97	0.72	0.31	0.845
BACH_HUMAN	0.68	0.41	0.68	0.54	0.545	0.61
ASSY_HUMAN	0.44	0.44	0.73	0.44	0.44	0.585
HXK1_HUMAN	1.55	0.87	1.18	0.6	1.21	0.89
GARS_HUMAN	0.83	0.5	1.25	0.5	0.665	0.875
QCR1_HUMAN	0.34	0.16	0.16	0.05	0.25	0.105
ECHB_HUMAN	0.43	0.19	0.3	0.3	0.31	0.3
RS3_HUMAN	0.33	0.07	0.43	0.33	0.2	0.38
RACK1_HUMAN	0.08	0.16	0.16	0.2	0.12	0.18
VDAC1_HUMAN			1.78	1.78	#DIV/0!	1.78
COX2_HUMAN	1.05	0.71	0.43	0.43	0.88	0.43
PHB_HUMAN	0.51	0.51	0.51		0.51	0.51
ECHM_HUMAN	0.14	0.1	0.14	0.1	0.12	0.12
TRXR1_HUMAN	0.71	0.31	0.71	0.49	0.51	0.6
EFTU_HUMAN	0.69	1.41	1.41	1.02	1.05	1.215
FAHD1_HUMAN	0.17	0.13	0.17	0.17	0.15	0.17
PHB2_HUMAN	0.35	0.11	0.5	0.35	0.23	0.425
VDAC2_HUMAN	0.16	0.25	0.21	0.21	0.205	0.21
CH10_HUMAN	0.29	0.13	0.13	0.21	0.21	0.17
GLO2_HUMAN	1	1.15	0.63	0.63	1.075	0.63
ATPB_HUMAN	1.03	0.66	1.03	0.66	0.845	0.845
ALDH2_HUMAN	0.23	0.23	0.23	0.23	0.23	0.23
ECHA_HUMAN	0.24	0.44	0.24	0.34	0.34	0.29
LEG3_HUMAN	0.3	0.14	0.3	0.22	0.22	0.26
CPT1A_HUMAN	0.72	0.97	0.97	0.97	0.845	0.97
ACADV_HUMAN	1.36	0.41	0.41	0.67	0.885	0.54
RS8_HUMAN		0.25	0.4	0.75	0.25	0.575
ANXA1_HUMAN	0.13	0.13	0.13	0.09	0.13	0.11
RL12_HUMAN	1.12	0.82	1.12	1.12	0.97	1.12
GGCT_HUMAN	0.34	0.06	0.26	0.19	0.2	0.225
RBM14_HUMAN	0.07	0.07	0.09	0.07	0.07	0.08
ENPL_HUMAN	0.86	0.86	1.1	0.86	0.86	0.98
1433E_HUMAN	0.04	0.04	0.09	0.13	0.04	0.11
RS27A_HUMAN	0.46	0.83	0.7	0.7	0.645	0.7
PITH1_HUMAN	1.12	0.76	0.93	1.12	0.94	1.025
COMT_HUMAN	0.6	0.4	0.71	0.49	0.5	0.6
COF1_HUMAN	0.25	0.25	0.34	0.25	0.25	0.295
IPYR_HUMAN	0.19	0.28	0.42	0.37	0.235	0.395
TERA_HUMAN	0.3	0.17	0.3	0.05	0.235	0.175
K1C17_HUMAN	0.35	0.16	0.25	0.08	0.255	0.165
RSSA_HUMAN	0.2	0.28	0.2	0.2	0.24	0.2
GDIB_HUMAN	0.05	0.03	0.08	0.07	0.04	0.075
IF2GL_HUMAN	0.23		0.23	0.23	0.23	0.23
RAN_HUMAN	0.14	0.31	0.14	0.31	0.225	0.225
H10_HUMAN	0.31	0.31	0.5	0.31	0.31	0.405
RS4X_HUMAN	0.05	0.05	0.1	0.05	0.05	0.075
PPCE_HUMAN	0.91	0.54	0.72	0.54	0.725	0.63
PRDX2_HUMAN	0.14		0.14		0.14	0.14
SERA_HUMAN	0.18	0.18	0.18	0.18	0.18	0.18
CLH1_HUMAN	0.75	0.12	0.56	0.12	0.435	0.34
FAS_HUMAN	0.28		0.28	0.28	0.28	0.28
SPB13_HUMAN	0.05		0.05	0.05	0.05	0.05
EF1G_HUMAN	0.15	0.15	0.15	0.15	0.15	0.15
LAMP1_HUMAN	0.09		0.09	0.09	0.09	0.09
EF2_HUMAN	0.1	0.1	0.1	0.1	0.1	0.1
HEXB_HUMAN	1.23	1.23	2.32	2.32	1.23	2.32
CATD_HUMAN	3.05	6.09	4.36	6.09	4.57	5.225
PLD3_HUMAN	0.09		0.09	0.09	0.09	0.09
PLEC_HUMAN	1	1.82	0.41	1	1.41	0.705
TTHY_HUMAN	0.11	0.11	0.11	0.11	0.11	0.11
TAGL2_HUMAN	1.33	1.33	1.33	1.33	1.33	1.33
KRA43_HUMAN	0.23	0.36	0.36	0.36	0.295	0.36
HNRPM_HUMAN	0.32	0.32	0.32	0.32	0.32	0.32
KRA96_HUMAN	0.16	0.35	0.57	0.35	0.255	0.46
S10A9_HUMAN	0.26	0.59	0.26	0.59	0.425	0.425
S40A1_HUMAN	0.31	0.31	0.2	0.09	0.31	0.145
KR261_HUMAN	0.11	0.11	0.23	0.11	0.11	0.17
CXAR_HUMAN	0.2	0.13	0.2	0.06	0.165	0.13
HNRPD_HUMAN	0.15	0.07	0.31	0.15	0.11	0.23
KR195_HUMAN	0.12		0.18	0.12	0.12	0.15
KRA31_HUMAN	0.25	0.08	0.25	0.16	0.165	0.205
GBB1_HUMAN	0.22		0.07	0.07	0.22	0.07
UFM1_HUMAN	0.49	0.62	0.75	0.75	0.555	0.75
CRIP2_HUMAN	4.09	4.09	4.09	3.25	4.09	3.67
KRA33_HUMAN	0.21	0.1	0.21	0.16	0.155	0.185
RL6_HUMAN	0.39	0.32	0.25	0.32	0.355	0.285
RL13A_HUMAN	0.04	0.08		0.04	0.06	0.04
RS7_HUMAN	0.25	0.19	0.43	0.19	0.22	0.31
YPEL5_HUMAN	0.07	0.07	0.1	0.07	0.07	0.085
APRV1_HUMAN	1.03	0.88	1.79	1.2	0.955	1.495
DHCR7_HUMAN	0.76	1.34	1.69	1.03	1.05	1.36
GSDMA_HUMAN	0.31		0.72	0.31	0.31	0.515
THIK_HUMAN	0.59	0.39	0.52	0.45	0.49	0.485
PGK1_HUMAN	0.1	0.1	0.07	0.1	0.1	0.085
PPIA_HUMAN	0.87	1.08	0.97	1.19	0.975	1.08
TKT_HUMAN	0.59	0.39	0.7	0.59	0.49	0.645
PABP1_HUMAN	0.43	0.43	0.61	1.04	0.43	0.825
ENASE_HUMAN	2.71	3.16	3.16	3.16	2.935	3.16
PADI3_HUMAN	0.48	0.48	0.48	0.34	0.48	0.41
CTNA1_HUMAN	0.44	0.59	0.51	0.77	0.515	0.64
SPB5_HUMAN	0.02	0.02	0.02	0.03	0.02	0.025
ENOA_HUMAN	0.13	0.13	0.09	0.04	0.13	0.065
S10AG_HUMAN	1.2	1.86	1.86	3.84	1.53	2.85
BIP_HUMAN	0.3	0.14	0.14	0.14	0.22	0.14
ATG9B_HUMAN	0.09	0.19	0.09	0.09	0.14	0.09
TRI29_HUMAN	2.1	1.93	1.93	0.71	2.015	1.32
EF1A3_HUMAN	0.7	0.94	0.94	1.21	0.82	1.075
1433T_HUMAN	0.66	1.01	1.01	1.01	0.835	1.01
K1C10_HUMAN	0.19	0.06	0.06	0.06	0.125	0.06
ROA1_HUMAN	0.81	0.61	1.04	0.81	0.71	0.925
LMNA_HUMAN	1.11	1.02	1.02	0.93	1.065	0.975
AHNK_HUMAN	0.32	0.15	0.32	0.15	0.235	0.235
CAN12_HUMAN	0.36	0.17	0.36	0.17	0.265	0.265
S10A3_HUMAN	0.35	0.11	0.65	0.11	0.23	0.38
CATB_HUMAN	1.04	1.18	0.91	0.79	1.11	0.85
K2C5_HUMAN	2.05	2.05	2.58	2.31	2.05	2.445
PRDX6_HUMAN	0.85	0.77	1.24	0.77	0.81	1.005
BLMH_HUMAN	0.12		0.12	0.12	0.12	0.12
GLCM_HUMAN	1.33	1.19	0.8	0.8	1.26	0.8
1433B_HUMAN	1.96	1.2	1.96	1.2	1.58	1.58
TGM3_HUMAN	0.09	0.2	0.2	0.2	0.145	0.2
PPIB_HUMAN	2.05	1.48	2.18	1.38	1.765	1.78
CSRP1_HUMAN	0.74		0.74	0.74	0.74	0.74
K1C14_HUMAN	0.88	0.64	0.88	0.64	0.76	0.76
ACTB_HUMAN	1.17	1.17	1.63	1.63	1.17	1.63
HSP7C_HUMAN	0.42	0.48	0.54	0.48	0.45	0.51
PDIA1_HUMAN	0.47	0.47	0.47	0.47	0.47	0.47
K1C16_HUMAN	0.38	0.21	0.38	0.3	0.295	0.34
GPC5D_HUMAN	2.03	2.03	2.43	2.03	2.03	2.23
PKP1_HUMAN	0.05	0.05	0.05	0.05	0.05	0.05
CAHM4_HUMAN	0.09	0.09	0.09	0.09	0.09	0.09
K2C80_HUMAN	0.36	0.36	0.36	0.36	0.36	0.36
CALL3_HUMAN	0.45	0.13	0.28	0.45	0.29	0.365
CTNB1_HUMAN	1.39	0.79	1.39	1.06	1.09	1.225
KRA42_HUMAN	0.05		0.05	0.16	0.05	0.105
CISY_HUMAN	0.33	0.21	0.21	0.1	0.27	0.155
TPIS_HUMAN	3.58	3.32	2.63	2.42	3.45	2.525
ZN543_HUMAN	1.75	1.75	1.58	1.14	1.75	1.36
PTPA_HUMAN	0.15	0.1	0.1	0.05	0.125	0.075
KRA44_HUMAN	2.27	0.81	1.43	2.27	1.54	1.85
EFHD1_HUMAN	1.21	0.94	1.53	1.21	1.075	1.37
HSPB1_HUMAN	0.42	0.26	0.42	0.26	0.34	0.34
EZRI_HUMAN	0.01	0.01	0.01	0.01	0.01	0.01
HNRH3_HUMAN	0.03	0.03	0.03		0.03	0.03
SBP1_HUMAN	0.03	0.03	0.03		0.03	0.03
AMPL_HUMAN	0.01	0.01	0.01		0.01	0.01
SFPQ_HUMAN	0.08	0.08	0.08	0.08	0.08	0.08
TRYP_PIG	0.06		0.06	0.06	0.06	0.06
KR10C_HUMAN	0.52	0.52	0.52	0.34	0.52	0.43
AKAP9_HUMAN	0.12	0.12		0.12	0.12	0.12
NPC1_HUMAN	0.14	0.14	0.14	0.14	0.14	0.14
RFX1_HUMAN	1	1	1	0.59	1	0.795
BRWD1_HUMAN	0.06	0.06	0.06	0.06	0.06	0.06
LAMP2_HUMAN	0.96	1.09	1.09	1.09	1.025	1.09
AAAT_HUMAN	0.13	0.13	0.13		0.13	0.13
DHB4_HUMAN	0.14	0.14	0.14	0.14	0.14	0.14
PRS45_HUMAN	9.83	8.1	11.17	8.64	8.965	9.905
H2A1_HUMAN	0.21	0.21	0.21	0.21	0.21	0.21
PTBP1_HUMAN	0.89	0.89	1.07	0.57	0.89	0.82
K1C40_HUMAN	1.9	2.02	2.15	1.67	1.96	1.91
SYPL1_HUMAN	0.22	0.22	0.22		0.22	0.22
KR103_HUMAN	0.37		0.37	0.37	0.37	0.37
KRT82_HUMAN	0.21		0.21	0.21	0.21	0.21
UB2D3_HUMAN	0.33	0.33	0.33	0.33	0.33	0.33
LDHB_HUMAN	0.94	0.64	0.64	0.18	0.79	0.41
PLAK_HUMAN	8.08	8.08	7.51	7.51	8.08	7.51
RS20_HUMAN	0.21		0.21	0.21	0.21	0.21
S10A6_HUMAN	0.32	0.32	0.32	0.32	0.32	0.32
IL1FA_HUMAN	0.24		0.24	0.24	0.24	0.24
CYTB_HUMAN	0.64	0.45	0.45	0.45	0.545	0.45
RB11B_HUMAN	0.24	0.24	0.24	0.24	0.24	0.24
K1H2_HUMAN	1.78	2.05	2.05	2.05	1.915	2.05
FIS1_HUMAN	0.64	0.64	0.93	0.64	0.64	0.785
RLA1_HUMAN	0.12	0.1	0.3	0.18	0.11	0.24
RL23_HUMAN	3.65	3.65	3.65	3.65	3.65	3.65
EPCR_HUMAN	0.16	0.11	0.16	0.16	0.135	0.16
LEG1_HUMAN	0.15	0.17	0.17	0.11	0.16	0.14
MDHM_HUMAN	1.04	1.04	1.92	0.71	1.04	1.315
CRYAB_HUMAN	1.02	1.33	2.09	1.68	1.175	1.885
PEPL_HUMAN			0.4	0.4	#DIV/0!	0.4
FABP4_HUMAN			0.45	0.45	#DIV/0!	0.45
LMNB1_HUMAN	48.6	40.31	45.67	40.31	44.455	42.99
CRBG1_HUMAN	0.34	0.34	0.34		0.34	0.34
GSTP1_HUMAN	1.67	1.36	1.36	1.67	1.515	1.515
KR191_HUMAN	1.17	1.54	1.17	1.54	1.355	1.355
KR193_HUMAN	1.37	1.74	1.55	2.16	1.555	1.855
KRT86_HUMAN	0.68	0.3	0.3		0.49	0.3
KR121_HUMAN	0.09	0.09	0.09	0.09	0.09	0.09
HCD2_HUMAN	0.16	0.08	0.24	0.16	0.12	0.2
H12_HUMAN	0.44	0.44	0.44	0.44	0.44	0.44
TBA1A_HUMAN	0.63	0.28	0.63	0.28	0.455	0.455
DCD_HUMAN	1.48	1.88	1.48	1.88	1.68	1.68
F16P1_HUMAN	0.89	0.8	0.8	0.63	0.845	0.715
RL3_HUMAN	2.49	3.18	3.18	3.18	2.835	3.18
OTUB2_HUMAN	1.16	0.78	1.16	0.78	0.97	0.97
RS26_HUMAN	2.72	1.93	6.62	4.33	2.325	5.475
H14_HUMAN	0.42	0.42	0.6	1.02	0.42	0.81
HPHL1_HUMAN	1.31	0.75	1.01	0.52	1.03	0.765
KR111_HUMAN	0.32	0.15	0.51	0.32	0.235	0.415
HSP72_HUMAN	0.81	0.22	0.22	0.22	0.515	0.22
1433S_HUMAN	39.55	39.55	42.54	36.76	39.55	39.65
1433G_HUMAN	28.26	24.99	26.58	23.5	26.625	25.04
LYG2_HUMAN	0.2	0.2	0.07	0.15	0.2	0.11
RL15_HUMAN	0.4	0.25	0.56	0.25	0.325	0.405
RS16_HUMAN	2.64	2.97	2.97	2.97	2.805	2.97
KT33A_HUMAN	28.05	24.76	26.36	23.25	26.405	24.805
KRT81_HUMAN	0.42	0.55	0.7	0.55	0.485	0.625
DSC3_HUMAN	0.16	0.16	0.16	0.08	0.16	0.12
GDPD3_HUMAN	0.66	0.48	0.86	0.4	0.57	0.63
ANXA2_HUMAN	0.22	0.22	0.3	0.3	0.22	0.3
KRT83_HUMAN	1.9	1.43	1.58	0.92	1.665	1.25
PCBP1_HUMAN	0.55	0.64	0.55	0.32	0.595	0.435
MAP11_HUMAN	2.09	2.22	2.46	1.71	2.155	2.085
K2C75_HUMAN	0.52	0.23	0.88	0.88	0.375	0.88
DX39B_HUMAN		0.1	0.1	0.21	0.1	0.155
CH60_HUMAN	0.12	0.12	0.26	0.26	0.12	0.26
DESP_HUMAN	0.1	0.05	0.1		0.075	0.1
FABP5_HUMAN	0.25	0.57	0.25	0.25	0.41	0.25
RL5_HUMAN	0.09	0.09	0.19	0.09	0.09	0.14
KR10A_HUMAN	0.83	0.22	1.48	0.66	0.525	1.07
GAN_HUMAN	0.29	0.67	0.67	0.67	0.48	0.67
RIDA_HUMAN	0.34	0.34	0.55	0.55	0.34	0.55
TALDO_HUMAN	0.23	0.07	0.23	0.15	0.15	0.19
ADT2_HUMAN	0.55	0.55	0.55	0.34	0.55	0.445
MIF_HUMAN	1.41	1.41	2	1.41	1.41	1.705
RAB10_HUMAN	0.05	0.05	0.05	0.05	0.05	0.05
AATM_HUMAN	0.13	0.13	0.13	0.13	0.13	0.13
H15_HUMAN	0.14	0.14	0.14	0.14	0.14	0.14
KRA22_HUMAN	0.27	0.27	0.27	0.27	0.27	0.27
GPNMB_HUMAN	0.24	0.24	0.24	0.24	0.24	0.24
MIC19_HUMAN	0.25	0.4	0.18	0.18	0.325	0.18
PSB6_HUMAN	0.23	0.23	0.23	0.23	0.23	0.23
RS25_HUMAN	0.31	0.31	0.31	0.31	0.31	0.31
PDCD5_HUMAN	0.38	0.24	0.38	0.24	0.31	0.31
CATA_HUMAN	0.14	0.14	0.14	0.14	0.14	0.14
RS23_HUMAN	0.26	0.26	0.26	0.26	0.26	0.26
FKB1A_HUMAN	0.15	0.15	0.15	0.15	0.15	0.15
KRA91_HUMAN	0.13	0.13	0.13	0.13	0.13	0.13
KRA46_HUMAN	0.47	0.47	0.47	0.47	0.47	0.47
KR241_HUMAN	0.37	0.37	0.37	0.37	0.37	0.37
KRA45_HUMAN	0.84	0.58	0.84	0.58	0.71	0.71
KRA49_HUMAN	0.39	0.39	0.39	0.39	0.39	0.39
PLP2_HUMAN	0.34	0.34	0.44	0.44	0.34	0.44
KRA97_HUMAN	0.96	0.96	0.96	0.96	0.96	0.96
ARL8B_HUMAN	0.94	0.94	0.94	0.94	0.94	0.94
KRA71_HUMAN	12	12	12	12	12	12
IF4A1_HUMAN	0.06	0.06	0.12	0.06	0.06	0.09
VSIG8_HUMAN	0.22	0.1	0.1	0.1	0.16	0.1
THIO_HUMAN	0.39	0.39	0.39	0.18	0.39	0.285
H4_HUMAN	0.31	0.31	0.72	0.31	0.31	0.515
4F2_HUMAN	0.85	0.59	0.59	0.59	0.72	0.59
KR109_HUMAN	2.83	1.56	3.38	1.56	2.195	2.47
PARK7_HUMAN	3.38	2.96	3.61	1.92	3.17	2.765
SCGR4_HUMAN	26.59	26.59	28.56	24.75	26.59	26.655
KRA99_HUMAN	0.82	0.43	0.82	0.82	0.625	0.82
TBB5_HUMAN	2.33	2.65	2.65	2.65	2.49	2.65
K2C1_HUMAN	1.09	1.09	1.09	1.09	1.09	1.09
K1H1_HUMAN	0.36	0.21	0.36	0.21	0.285	0.285
1433Z_HUMAN	0.09	0.18	0.18	0.18	0.135	0.18
G3P_HUMAN	0.1	0.2	0.1	0.2	0.15	0.15
DUS14_HUMAN	16.18	13.09	16.18	17.35	14.635	16.765
PLCD1_HUMAN	0.25	0.25	0.25	0.16	0.25	0.205
MPCP_HUMAN	2.26	2.26	2.26	0.96	2.26	1.61
GGH_HUMAN	0.52	0.65	0.65		0.585	0.65
KRT34_HUMAN	0.14	0.14	0.47	0.29	0.14	0.38
SAHH_HUMAN	1.28	1.44	1.28	1.44	1.36	1.36
KR131_HUMAN	2	1.81	1.81	1.47	1.905	1.64
LDHA_HUMAN	2.78	2.78	2.78	2.2	2.78	2.49
PSA2_HUMAN	0.43	0.58	0.58	0.58	0.505	0.58
TBA4A_HUMAN	37.25	29.24	37.25	31.07	33.245	34.16
KRT38_HUMAN	0.41	0.32	0.41	0.32	0.365	0.365
KR132_HUMAN	0.13	0.13	0.63	0.13	0.13	0.38
LRC15_HUMAN	0.22	0.13	0.38	0.33	0.175	0.355
KRT85_HUMAN	2.81	1.73	3.35	2.12	2.27	2.735
PPAP_HUMAN	0.05	0.05	0.1	0.05	0.05	0.075
CLIC1_HUMAN	0.1	0.1	0.1	0.2	0.1	0.15
TBB2A_HUMAN	0.85	0.85	0.59	0.59	0.85	0.59
DDX3X_HUMAN	0.54		0.77	0.33	0.54	0.55
TACD2_HUMAN	3.07	1.91	3.65	1.73	2.49	2.69
KRA92_HUMAN	1.51	1.25	1.51	1.02	1.38	1.265
LYPA1_HUMAN	0.65	0.65	0.65	0.65	0.65	0.65
TBB4B_HUMAN	0.62	0.62	0.62	0.62	0.62	0.62
K1C9_HUMAN	0.54		0.54	0.24	0.54	0.39
KRA93_HUMAN	0.24	0.11	0.11	0.11	0.175	0.11
KRA15_HUMAN	0.15	0.15	0.23	0.15	0.15	0.19
PROF1_HUMAN	0.31	0.72	0.31	0.31	0.515	0.31
VDAC3_HUMAN	0.11		0.11	0.22	0.11	0.165
HNRH1_HUMAN	2.09	2.09	2.09	2.09	2.09	2.09
CYC_HUMAN	0.89	0.53	0.89	0.53	0.71	0.71
ATPG_HUMAN	29.26	33.88	29.26	31.48	31.57	30.37
KRA32_HUMAN	0.12	0.12	0.19	0.06	0.12	0.125
KRA23_HUMAN	0.88	1.32	1.32	1.32	1.1	1.32
KT33B_HUMAN	2.31	2.76	2.31	2.11	2.535	2.21
SPIT1_HUMAN	0.28	0.13	0.13		0.205	0.13
H31_HUMAN	0.06	0.03	0.1	0.06	0.045	0.08
KRT36_HUMAN		0.44	0.52	0.37	0.44	0.445
MREG_HUMAN	0.77	0.77	1.15	0.46	0.77	0.805
DSG3_HUMAN	0.17	0.11	0.24	0.3	0.14	0.27
HS71A_HUMAN	24.98	26.73	26.73	17.76	25.855	22.245
RS13_HUMAN		0.16	0.67		0.16	0.67
G6PI_HUMAN	0.72	0.31	0.72	0.72	0.515	0.72
KRT35_HUMAN	0.35	0.16	0.16	0.26	0.255	0.21
ALDOA_HUMAN	0.56		0.35	0.35	0.56	0.35
S10AE_HUMAN	1	0.84	0.78	0.63	0.92	0.705
PPME1_HUMAN	1.38	1.38	1.38	0.54	1.38	0.96
RAB1B_HUMAN	0.37	0.17	0.37	0.17	0.27	0.27
DSG4_HUMAN	0.41	0.21	0.35	0.35	0.31	0.35
LEG7_HUMAN	0.12	0.06	0.06	0.12	0.09	0.09
KRA11_HUMAN	0.53	0.53	0.82	0.41	0.53	0.615
PKP3_HUMAN	0.12	0.25	0.39	0.25	0.185	0.32
KR161_HUMAN	0.21	0.1	0.21	0.1	0.155	0.155
H2AY_HUMAN	3.62	3.11	3.11	2.25	3.365	2.68
RS3A_HUMAN	0.17		0.36		0.17	0.36
BAP31_HUMAN	1.79	1.65	1.94	0.95	1.72	1.445
K1C39_HUMAN	0.59	0.36	0.36	0.17	0.475	0.265
CDC42_HUMAN	0.13	0.13	0.44	0.13	0.13	0.285
K22E_HUMAN	1.14	1.14	1.14	1.43	1.14	1.285
APOD_HUMAN	0.28	0.28	0.65	0.65	0.28	0.65
MDHC_HUMAN	0.84	0.36	0.84	0.36	0.6	0.6
RL30_HUMAN	0.05	0.05	0.05	0.11	0.05	0.08
RL37A_HUMAN	0.08	0.08	0.08	0.04	0.08	0.06
PLBL1_HUMAN	0.13	0.13	0.43		0.13	0.43
RL8_HUMAN	0.24	0.24	0.24	0.11	0.24	0.175
CAPZB_HUMAN	0.55	0.25	0.55	0.55	0.4	0.55
RL22_HUMAN	0.48	0.22	0.48	0.1	0.35	0.29
RS2_HUMAN	0.11	0.37	0.23	0.23	0.24	0.23
RS15A_HUMAN	0.55	0.55	0.55	0.55	0.55	0.55
ECHD1_HUMAN	0.11	0.35	0.35	0.22	0.23	0.285
HS90B_HUMAN	0.08	0.04	0.13	0.13	0.06	0.13
VATB2_HUMAN	0.19	0.13	0.13	0.13	0.16	0.13
KC1D_HUMAN		0.24	0.15		0.24	0.15
RL7_HUMAN	0.41	0.12	0.41	0.41	0.265	0.41
NEUR2_HUMAN	0.27	0.37	0.48	0.27	0.32	0.375
G6PD_HUMAN		0.06	0.3	0.11	0.06	0.156667

## Sheet: 1J
	Log 2 fold difference (White/Dark)	Mitochondrial: -Log10 P value	Lysosomal: -Log10 P value	All other: -Log10 P value
ANXA1 ANX1 LPC1	2.04439			2.5044
GGCT C7orf24 CRF21	1.68082			1.52537
RPL6 TXREB1	1.57399			2.16711
SOD1	1.40881	1.17083
ACOT7 BACH	1.40718	1.65931
ASS1 ASS	1.13006	0.866499
HSP90B1 GRP94 TRA1	1.09954			1.36855
RPL13A	1.09311			0
RPS27A UBA80 UBCEP1	1.05614			0.99878
COMT	1.05295	1.28971
CFL1 CFL	1.00319			1.37995
GARS	0.955606	1.09373
PPA1 IOPPP PP	0.94596			0.763778
UQCRC1	0.925999	1.01764
KRT17	0.921775			1.30677
SERPINB13 PI13	0.87179			1.33135
RPSA LAMBR LAMR1	0.861721			1.49291
RACK1 GNB2L1 HLC7 PIG21	0.856834	1.58701
EEF1G EF1G PRO1608	0.827163			1.42571
HADHB MSTP029	0.823122	1.81269
GDI2 RABGDIB	0.807355			1.22422
RAN ARA24 OK/SW-cl.81	0.803386			1.23084
RPS7	0.784832			0.737
H1F0 H1FV	0.762501			0.527681
PRDX2 NKEFB TDPX1	0.724366			2.22628
EEF2 EF2	0.710493			1.0248
YPEL5 CGI-127	0.708951			0.740669
ASPRV1 SASP	0.649814			0.623013
RPS3 OK/SW-cl.26	0.634819	2.23258
DHCR7 D7SR	0.634716			0.623013
GSDMA GSDM GSDM1 FKSG9	0.628031			0.410659
ACAA1 ACAA PTHIO	0.624491	0.641544
PGK1 PGKA MIG10 OK/SW-cl.110	0.601641			0.564972
PPIA CYPA	0.601322			0.924595
TKT	0.563901	0.885208
PABPC1 PAB1 PABP1 PABPC2	0.557056			1.24932
PADI3 PAD3 PDI3	0.538096			0.544401
SERPINB5 PI5	0.510373			0.708784
ENO1 ENO1L1 MBPB1 MPB1	0.461678			0.629981
HSPA5 GRP78	0.457583			0.934319
ATG9B APG9L2 NOS3AS	0.454566			0.722352
TRIM29 ATDC	0.439821			1.61187
EEF1A1P5 EEF1AL3	0.434231			0.942915
YWHAQ	0.401688			0.425779
KRT10 KPP	0.367312			0.627726
HNRNPA1 HNRPA1	0.367209			0.757513
AHNAK PM227	0.36257			0.683964
CAPN12	0.331206			0.340188
S100A3 S100E	0.327704			0.268463
KRT5	0.320847	0.302044
PRDX6 AOP2 KIAA0106	0.318127			0.739616
BLMH	0.308308			0.729191
GBA GC GLUC	0.302563			0.187605
YWHAB	0.297864			0.561442
TGM3	0.297386			2.13076
PPIB CYPB	0.287802			0.26967
CSRP1 CSRP CYRP	0.284977			0.26967
KRT14	0.270414			0.408093
ACTB	0.257588			1.15238
HSPA8 HSC70 HSP73 HSPA10	0.255898			0.386892
GPRC5D	0.250543			0.26967
PKP1	0.24323			0.47494
KRT80 KB20	0.2367			0.494533
CALML3	0.234465			0.428084
CTNNB1 CTNNB OK/SW-cl.35 PRO2286	0.22741			0.839389
KRTAP4-2 KAP4.2 KRTAP4.2	0.214739			0.407821
CS	0.207325	0.311356
TPI1 TPI	0.205279			0.288302
KRTAP4-4 KAP4.13 KAP4.4 KRTAP4-13 KRTAP4.13 KRTAP4.4	0.204141			0.407821
EFHD1 SWS2 PP3051	0.200533			0.161697
HSPB1 HSP27 HSP28	0.200232			0.311021
HNRNPH3 HNRPH3	0.199938			0.14463
SELENBP1 SBP	0.199041			0.448919
LAP3 LAPEP PEPS	0.198622			0.52857
SFPQ PSF	0.192645			0.204865
HSPE1	0.190822	0.175403
	0.185498			0.455429
KRTAP10-12 KAP10.12 KAP18-12 KRTAP10.12 KRTAP18-12 KRTAP18.12	0.180572			0.26967
HSD17B4 EDH17B4 SDR8C1	0.177538			0.280419
HIST1H2AG H2AFP; HIST1H2AI H2AFC; HIST1H2AK H2AFD; HIST1H2AL H2AFI; HIST1H2AM H2AFN	0.174957			0.26967
KRT40 KA36	0.169925			0.299276
KRT82 KRTHB2	0.167633			0.369073
LDHB	0.165187	0.340077
JUP CTNNG DP3	0.161562			0.703701
RAB11B YPT3	0.158698			0.101198
KRT32 HHA2 HKA2 KRTHA2	0.155709			0.345006
PROCR EPCR	0.144772			0.407821
MDH2	0.137322	0.368703
CRYAB CRYA2 HSPB5	0.13245			0.18357
PPL KIAA0568	0.129283			0.0832758
FABP4	0.128048			0.0832662
LMNB1 LMN2 LMNB	0.127756			0.26967
CRYBG1 AIM1	0.125531			0.170264
ATP5F1B ATP5B ATPMB ATPSB	0.114712	0.11169
GSTP1 FAEES3 GST3	0.110183			0.172339
KRT86 KRTHB6	0.107874			0.415699
HSD17B10 ERAB HADH2 MRPP2 SCHAD SDR5C1 XH98G2	0.106183			0.140405
HIST1H1C H1F2	0.102009			0.26967
TUBA1A TUBA3	0.0894474			0.193048
HIST1H1E H1F4	0.0885367			0.26967
HEPHL1	0.0857299			0.204198
KRTAP11-1 KAP11.1 KRTAP11.1	0.085216			0.26967
HSPA2	0.0724358			0.121732
SFN HME1	0.0623659			0.0454602
LYG2 LYGH	0.0573875			0.037547
RPS16	0.0499252			0.0252809
KRT33A HHA3-I HKA3A KRTHA3A	0.0458977			0.167624
KRT81 KRTHB1 MLN137	0.0438009			0.2084
DSC3 CDHF3 DSC4	0.023459			0.0236174
ANXA2 ANX2 ANX2L4 CAL1H LPC2D	0.0226606			0.0483944
KRT83 KRTHB3	0.0212854			0.0889806
PCBP1	0.0130562			0.0287788
KRT75 K6HF KB18	0.0120728			0.0141563
ALDH2 ALDM	0.00744298	0.00925558
HSPD1 HSP60	0.00702043			0.0103614
DSP	0.00511292			0.0128484
FABP5	0			0
KRTAP10-10 KAP10.10 KAP18-10 KRTAP10.10 KRTAP18-1 KRTAP18.10	0			0
RIDA HRSP12	0			0
TALDO1 TAL TALDO TALDOR	0			0
SLC25A5 ANT2	0			0
MIF GLIF MMIF	0			0
GOT2	0	0
HIST1H1B H1F5	0			0
KRTAP2-2 KAP2.2 KRTAP2.2	0			0
GPNMB HGFIN NMB UNQ1725/PRO9925	0			0
CHCHD3 MIC19 MINOS3	0			0
PSMB6 LMPY Y	0			0
RPS25	0			0
PDCD5 TFAR19	0			0
RPS23	0			0
FKBP1A FKBP1 FKBP12	0			0
KRTAP9-1 KAP9.1 KRTAP9.1 KRTAP9L3	0			0
KRTAP4-6 KAP4.15 KRTAP4-15 KRTAP4.15 KRTAP4.6	0			0
KRTAP24-1 KAP24.1	0			0
KRTAP4-5 KAP4.5 KRTAP4.5	0			0
KRTAP4-9 KAP4.9 KRTAP4.9	0			0
PLP2 A4	0			0
KRTAP9-7 KAP9.7 KRTAP9.7 KRTAP9L1	0			0
ARL8B ARL10C GIE1	0			0
KRTAP7-1 KAP7.1 KRTAP7.1	0			0
VSIG8 C1orf204	0			0
TXN TRDX TRX TRX1	0			0
HIST1H4A H4/A H4FA; HIST1H4B H4/I H4FI; HIST1H4C H4/G H4FG; HIST1H4D H4/B H4FB; HIST1H4E H4/J H4FJ; HIST1H4F H4/C H4FC; HIST1H4H H4/H H4FH; HIST1H4I H4/M H4FM; HIST1H4J H4/E H4FE; HIST1H4K H4/D H4FD; HIST1H4L H4/K H4FK; HIST2H4A H4/N H4F2 H4FN HIST2H4; HIST2	0			0
SLC3A2 MDU1	0			0
KRTAP10-9 KAP10.9 KAP18-9 KRTAP10.9 KRTAP18-9 KRTAP18.9	0			0
PARK7	-1.602e-16	0
SCYGR4 KRTAP28-4	-1.602e-16			0
KRTAP9-9 KAP9.5 KAP9.9 KRTAP9-5 KRTAP9.5 KRTAP9.9	-3.203e-16			0
TUBB TUBB5 OK/SW-cl.56	-0.0030893			0.0029861
KRT1 KRTA	-0.0048535			0.00438477
KRT31 HHA1 HKA1 KRTHA1	-0.0054089			0.0191597
YWHAZ	-0.0099497			0.0101158
DUSP14 MKP6	-0.0197182			0.0393652
SLC25A3 PHC OK/SW-cl.48	-0.0227201			0.0164958
GGH	-0.0473057		0.0272086
KRT34 HHA4 HKA4 KRTHA4	-0.050119			0.164114
KRTAP13-1 KAP13.1 KRTAP13.1	-0.0512687			0.0687316
TUBA4A TUBA1	-0.0546442			0.126392
KRT38 HHA8 HKA8 KRTHA8	-0.0617396			0.0956271
KRTAP13-2 KAP13.2	-0.0772819			0.407821
LRRC15 LIB	-0.0839388			0.107068
KRT85 KRTHB5	-0.084684			0.311288
ACPP	-0.0862998		0.26967
HADHA HADH	-0.0922585	0.0659873
TUBB2A TUBB2	-0.0961688			0.124473
KRTAP9-2 KAP9.2 KRTAP9.2	-0.124696			0.26967
TUBB4B TUBB2C	-0.13801			0.177525
KRT9	-0.147633			0.110904
KRTAP9-3 KAP9.3 KRTAP9.3	-0.157541			0.407821
KRTAP1-5 KAP1.5 KRTAP1.5	-0.159546			0.407821
HNRNPH1 HNRPH HNRPH1	-0.160465			0.26967
KRTAP3-2 KAP3.2 KRTAP3.2	-0.164546			0.407821
KRTAP2-3 KAP2.3 KRTAP2.3	-0.172181			0.26967
KRT33B HHA3-II HKA3B KRTHA3B	-0.185114			1.2936
SPINT1 HAI1 UNQ223/PRO256	-0.192645			0.163974
KRT36 HHA6 HKA6 KRTHA6	-0.209084			0.454132
KRT35 HHA5 HKA5 KRTHA5	-0.209697			0.650601
S100A14 S100A15	-0.221558			0.407821
DSG4 CDHF13	-0.233133			0.799927
LGALS7 PIG1; LGALS7B	-0.23816	0.407821
KRTAP1-1 B2A KAP1.1 KAP1.6 KAP1.7 KRTAP1.1	-0.245113			0.26967
PKP3	-0.250227			0.486002
KRTAP16-1 KAP16.1	-0.25634			0.191366
H2AFY MACROH2A1	-0.258828			0.297028
KRT39 KA35	-0.271166			0.766006
KRT2 KRT2A KRT2E	-0.282653			0.295197
LGALS3 MAC2	-0.287612			0.375779
PLBD1	-0.29956		0.170176
ACADVL VLCAD	-0.303781	0.282614		0.282614
NEU2	-0.307324			0.416604
KRTAP4-3 KAP4.3 KRTAP4.3	-0.339975			0.683964
VDAC1 VDAC	-0.348303	0.887684
KRTAP9-6 KAP9.6 KRTAP9.6 KRTAP9L2	-0.384664			0.407821
KRTAP19-5 KAP19.5	-0.386306			0.740669
KRTAP3-1 KAP3.1 KRTAP3.1	-0.562948			1.24461
CRIP2 CRP2	-0.669851			0.740669
HEXB HCC7	-0.686842			0.612972
KRTAP3-3 KAP3.3 KRTAP3.3	-0.694587			0.964968
CTSD CPSD	-0.747234			0.783229
PLD3	-0.788496		2.88249
KRA49_HUMAN	1			0
PLP2_HUMAN	1			0
KRA97_HUMAN	1			0
ARL8B_HUMAN	1			0
KRA71_HUMAN	1			0
VSIG8_HUMAN	1			0
THIO_HUMAN	1			0
H4_HUMAN	1			0
4F2_HUMAN	1			0
KR109_HUMAN	1			0
BRWD1_HUMAN	1			0
PRS45_HUMAN	1			0
SYPL1_HUMAN	1			0
KR103_HUMAN	1			0
RS20_HUMAN	1			0
CYTB_HUMAN	1			0
RLA1_HUMAN	1			0
EZRI_HUMAN	1			0
AKAP9_HUMAN	1			0
NPC1_HUMAN	1			0
RFX1_HUMAN	1			0
LAMP2_HUMAN	1			0
AAAT_HUMAN	1			0
GLO2_HUMAN	1			0
PTBP1_HUMAN	1			0
UB2D3_HUMAN	1			0
S10A6_HUMAN	1			0
IL1FA_HUMAN	1			0
FIS1_HUMAN	1			0
RL23_HUMAN	1			0
LEG1_HUMAN	1			0
KR191_HUMAN	1			0
KR193_HUMAN	1			0
KR121_HUMAN	1			0
DCD_HUMAN	1			0
F16P1_HUMAN	1			0
RL3_HUMAN	1			0
OTUB2_HUMAN	1			0
RS26_HUMAN	1			0
PARK7_HUMAN	1			0
SCGR4_HUMAN	1			-1.6e-16
ZN543_HUMAN	1			-1.6e-16
PTPA_HUMAN	1			-1.6e-16
KRA99_HUMAN	1			-1.6e-16
TBB5_HUMAN	1			-3.2e-16
K2C1_HUMAN	1			-0.003089
K1H1_HUMAN	1			-0.004853
1433Z_HUMAN	0.99			-0.005409
CAHM4_HUMAN	0.99			-0.00995
DUS14_HUMAN	0.99			-0.012939
MPCP_HUMAN	0.98			-0.019718
VDAC2_HUMAN	0.98			-0.02272
K1C16_HUMAN	0.98			-0.03012
PDIA1_HUMAN	0.97			-0.034599
GGH_HUMAN	0.97			-0.039528
KRT34_HUMAN	0.97			-0.047306
KR131_HUMAN	0.97			-0.050119
PHB2_HUMAN	0.96			-0.051269
TBA4A_HUMAN	0.96			-0.054156
KRT38_HUMAN	0.96			-0.054644
KR132_HUMAN	0.95			-0.06174
LRC15_HUMAN	0.94			-0.077282
KRT85_HUMAN	0.94			-0.083939
PPAP_HUMAN	0.94			-0.084684
ECHA_HUMAN	0.94			-0.0863
TBB2A_HUMAN	0.94			-0.092259
CATB_HUMAN	0.93			-0.096169
FAHD1_HUMAN	0.93			-0.100929
KRA92_HUMAN	0.92			-0.103093
TBB4B_HUMAN	0.91			-0.124696
K1C9_HUMAN	0.9			-0.13801
LMNA_HUMAN	0.9			-0.147633
KRA93_HUMAN	0.9			-0.148251
KRA15_HUMAN	0.9			-0.157541
HNRH1_HUMAN	0.89			-0.159546
KRA32_HUMAN	0.89			-0.160465
KRA23_HUMAN	0.89			-0.164546
KT33B_HUMAN	0.88			-0.172181
SPIT1_HUMAN	0.88			-0.185114
S10AG_HUMAN	0.87			-0.192645
KRT36_HUMAN	0.87			-0.205374
KRT35_HUMAN	0.86			-0.209084
CTNA1_HUMAN	0.86			-0.209697
S10AE_HUMAN	0.86			-0.215729
ENASE_HUMAN	0.85			-0.221558
DSG4_HUMAN	0.85			-0.228819
LEG7_HUMAN	0.85			-0.233133
KRA11_HUMAN	0.84			-0.23816
PKP3_HUMAN	0.84			-0.245112
EFTU_HUMAN	0.84			-0.250227
KR161_HUMAN	0.84			-0.25634
TRXR1_HUMAN	0.84			-0.25634
H2AY_HUMAN	0.84			-0.258734
K1C39_HUMAN	0.83			-0.258828
ECHM_HUMAN	0.82			-0.271166
K22E_HUMAN	0.82			-0.280108
LEG3_HUMAN	0.82			-0.282653
PLBL1_HUMAN	0.81			-0.287612
ACADV_HUMAN	0.81			-0.29956
NEUR2_HUMAN	0.81			-0.303781
KRA43_HUMAN	0.79			-0.307324
VDAC1_HUMAN	0.79			-0.339975
UFM1_HUMAN	0.78			-0.348304
GBB1_HUMAN	0.77			-0.352302
KRA96_HUMAN	0.77			-0.384664
KR195_HUMAN	0.77			-0.384664
HNRPD_HUMAN	0.75			-0.386306
CXAR_HUMAN	0.73			-0.415037
KR261_HUMAN	0.73			-0.454566
S40A1_HUMAN	0.71			-0.462343
S10A9_HUMAN	0.71			-0.485427
PHB_HUMAN	0.68			-0.5025
KRA31_HUMAN	0.68			-0.556766
LAMP1_HUMAN	0.66		-0.562948
COX2_HUMAN	0.65			-0.601049
CRIP2_HUMAN	0.63			-0.61891
HNRPM_HUMAN	0.63			-0.669851
HEXB_HUMAN	0.62			-0.678072
KRA33_HUMAN	0.62			-0.686842
CATD_HUMAN	0.6			-0.694587
PLD3_HUMAN	0.58			-0.747234
TAGL2_HUMAN	0.56			-0.788496
TTHY_HUMAN	0.53			-0.847997
				-0.924899

## Sheet: 1K
	Female Dark 1	Female Dark 2	Male Dark 1	Male Dark 2	Female White 1	Female White 2	Male White 1	Male White 2
PLD3	1.2	1.47	1.2	1.2	0.67	0.93	0.67	0.67
CTSD CPSD	1.6	0.57	1.6	1.24	1.24	0.57	0.89	0.28
KRTAP3-3 KAP3.3 KRTAP3.3	0.76	1.2	1.78	1.2	0.76	0.76	0.76	0.76
HEXB HCC7	1.68	0.41	1.42	1.42	1.12	0.64	1.12	0.19
CRIP2 CRP2	1.68	1.68	0.77	0.77	0.77	0.77	0.77	0.77
KRTAP3-1 KAP3.1 KRTAP3.1	1	1.38	1.38	1	0.5	1	0.72	1
KRTAP19-5 KAP19.5	1.13	1.13	1.13	1.13	0.6	0.6	1.13	1.13
KRTAP9-6 KAP9.6 KRTAP9.6 KRTAP9L2	0.87	0.87	0.87	1.93	0.87	0.87	0.87	0.87
VDAC1 VDAC	1.18	1.18	1.18	0.94	1.18	0.7	0.94	0.7
KRTAP4-3 KAP4.3 KRTAP4.3	1.23	0.77	1.23	1.23	0.77	0.77	1.23	0.77
PPIA CYPA	1.27	0.33	0.79	0.79	1.27	1.27	1.27	1.01
PGK1 PGKA MIG10 OK/SW-cl.110	0.31	0.5	1.66	0.7	0.91	1.15	1.39	1.39
ACAA1 ACAA PTHIO	0.52	0.52	1.05	1.05	1.64	0.52	1.64	1.05
GSDMA GSDM GSDM1 FKSG9	0.5	0.5	1.64	0.5	1.07	0.5	2.21	1.07
DHCR7 D7SR	1.07	0.49	1.07	0.49	1.65	1.07	1.65	0.49
RPS3 OK/SW-cl.26	0.85	0.6	0.85	0.85	1.14	1.14	1.45	1.14
ASPRV1 SASP	0.48	0.48	1.07	1.07	1.66	1.66	1.07	0.48
YPEL5 CGI-127	0.76	0.76	0.76	0.76	0.76	1.72	0.76	1.72
EEF2 EF2	0.59	0.59	0.75	1.1	0.75	1.1	1.66	1.46
PRDX2 NKEFB TDPX1	0.68	0.68	0.98	0.68	1.34	0.98	1.34	1.34
H1F0 H1FV	0.72	0.72	1.18	0.34	2.4	0.72	0.72	1.18
RPS7	0.57	0.57	0.57	1.24	0.57	1.24	2.02	1.24
RAN ARA24 OK/SW-cl.81	1.01	0.7	0.2	1.01	1.01	1.36	1.36	1.36
GDI2 RABGDIB	0.65	0.65	0.65	0.97	0.97	1.78	0.97	1.37
HADHB MSTP029	0.39	0.83	0.83	0.83	1.28	1.28	1.28	1.28
EEF1G EF1G PRO1608	0.72	0.72	0.72	0.72	1.4	0.93	1.65	1.14
RACK1 GNB2L1 HLC7 PIG21	1	0.28	0.79	0.79	1.47	1	1.22	1.47
RPSA LAMBR LAMR1	0.76	0.55	0.76	0.76	1.57	1.01	1.57	1.01
SERPINB13 PI13	0.5	0.33	1.12	0.88	0.88	1.6	1.35	1.35
KRT17	0.64	0.97	0.8	0.35	1.54	1.77	0.97	0.97
UQCRC1	0.48	0.48	0.9	0.9	2	0.9	0.9	1.45
PPA1 IOPPP PP	0.44	0.44	1.41	0.44	1.41	0.44	2.01	1.41
GARS	0.33	0.66	1.4	0.33	1.4	1.07	1.4	1.4
CFL1 CFL	0.81	0.22	0.81	0.81	0.81	1.66	1.66	1.2
COMT	0.75	0.75	0.34	0.75	1.73	0.75	1.73	1.19
RPS27A UBA80 UBCEP1	0.89	0.41	0.89	0.41	2.16	1.46	0.89	0.89
RPL13A	0.64	0.64	0.64	0.64	1.36	1.36	1.36	1.36
HSP90B1 GRP94 TRA1	0.73	0.36	0.73	0.73	0.73	1.45	1.45	1.82
ASS1 ASS	0.33	0.71	1.14	0.33	1.56	0.33	2.04	1.56
ACOT7 BACH	0.9	0.43	0.43	0.43	2.05	0.9	1.43	1.43
SOD1	0.42	0.94	0.42	0.42	1.57	0.94	2.36	0.94
RPL6 TXREB1	0.5	0.5	0.5	0.5	1.05	1.65	1.65	1.65
GGCT C7orf24 CRF21	0.25	0.25	0.87	0.54	2.25	1.26	1.71	0.87
ANXA1 ANX1 LPC1	0.25	0.25	0.53	0.53	1.9	1.14	1.9	1.51

## Sheet: Experiment 2 Raw Values
RAW DATA for all proteins detected in >3 samples
	Dark						White
Gene names	LFQ intensity Dark1	LFQ intensity Dark2	LFQ intensity Dark3	LFQ intensity Dark4	LFQ intensity Dark5	LFQ intensity Dark6	LFQ intensity White1	LFQ intensity White2	LFQ intensity White3	LFQ intensity White4	LFQ intensity White5
KRTAP3-1	1656000000	15224000000	1628600000	6734900000	99518000	936410000	2221500000	405050000	656100000	1557700000	1000400000
KRTAP4-3	200450000	4217500000	1565600000	50051000	250120000	165090000	364790000	1443100000	215900000	377310000	452550000
HIST1H2BL;HIST1H2BM;HIST1H2BN;HIST1H2BH;HIST2H2BF;HIST1H2BC;HIST1H2BD;H2BFS;HIST1H2BK;HIST1H2BA	244830000	79238000	1219700000	26035000	4166900000	244480000	144740000	946360000	534780000	298510000	1530900000
KRT6C	25026000	3684800	18417000	14468000	64998000	25134000	12451000	21651000	11015000	18327000	14048000
TUBB2A;TUBB2B	8104800	13118000	12902000	14462000	7060900	11247000	14904000	19082000	29570000	11623000	28957000
GSN	19247000	7664200	12054000	14478000	9220200	20082000	24314000	5811100	5220900	12348000	1161800
	4352400000	1664700000	6407000000	10461000000	3529100000	8168800000	6841300000	2183900000	1566900000	1384100000	874240000
KRT85	4327900000	6469500000	9789300000	900380000	2377300000	6146700000	1956900000	20924000000	6243400000	6136800000	11142000000
KRTAP2-2;KRTAP2-1	66649000	485650000	371070000	184720000	466520000	58420000	86981000	277610000	277590000	405350000	1069100000
KRTAP4-9	6280700	7877500	51799000	11947000	92258000	67361000	4462800	74717000	95129000	77794000	120460000
APOD	21425000	14138000	9102100	21328000	33097000	12559000	20938000	46065000	10994000	11542000	42698000
KRT35	113250000	238850000	1083400000	52110000	76622000	443720000	35251000	670590000	921730000	119660000	842120000
KRT86	10458000000	13883000000	35574000000	8109200000	9209000000	19744000000	9238000000	22455000000	25890000000	14508000000	36561000000
CFL1	3966100	31960000	22648000	30411000	83004000	6552100	26724000	74701000	25619000	63664000	37511000
KRT81	62891000	610960000	1526300000	187540000	235140000	343970000	69436000	714850000	339400000	558520000	420690000
C3	198310000	51734000	55588000	176110000	62462000	260050000	218590000	38613000	158010000	63768000	15315000
KRT39	40236000	300100000	104640000	63999000	32820000	43637000	88348000	151970000	167160000	88880000	196390000
SERPING1	79265000	23854000	34017000	46154000	20290000	121330000	102170000	19044000	17105000	16013000	1847700
HPX	486070000	78822000	126040000	186640000	100670000	304030000	445720000	58832000	55288000	68617000	14148000
KRT33A	2498600000	1949800000	5816500000	2908700000	182510000	5112800000	2255200000	4945300000	2179300000	2817900000	5365300000
ACTB;ACTG1	19080000	12358000	22925000	26104000	26508000	34041000	37384000	174400000	66316000	13828000	313360000
DSP	122480000	39005000	111830000	63740000	27169000	128070000	88242000	704630000	614740000	114720000	827670000
APOC3	56422000	9366100	17406000	19712000	10898000	39716000	36941000	23608000	3868600	11017000	3913000
GC	280760000	126860000	83164000	210200000	82262000	179510000	265090000	85817000	37132000	78183000	7785300
KRT1	2578400000	133100000	2082100000	1416500000	884340000	1013200000	388030000	2538400000	1213800000	621020000	1664300000
KRT9	1410900000	292010000	1133600000	1035300000	588050000	330990000	224950000	633880000	508830000	400160000	961210000
KNG1	81530000	31388000	18379000	64680000	15258000	30785000	62531000	23727000	25023000	19050000	2600500
CP	123560000	36941000	8640400	85415000	17863000	113100000	89741000	16783000	18577000	19764000	2568500
KRTAP9-9;KRTAP9-8	57294000	190870000	233080000	107870000	22868000	71068000	66054000	210710000	194810000	150170000	143050000
ALB	6987000000	1722300000	1470700000	3140100000	1453900000	3389300000	5065100000	1563000000	781010000	1153100000	305170000
IGKC	36367000	17704000	16220000	36399000	19678000	26410000	41029000	13586000	9231800	17947000	2017100
PLP2	67322000	85006000	40438000	34185000	13838000	99691000	123150000	181190000	35090000	55418000	48838000
APOA4	67365000	14793000	15453000	32131000	10373000	47036000	52734000	18967000	11083000	16078000	4715400
KRT2	488850000	25720000	450720000	560870000	259080000	147380000	118600000	285430000	283860000	210590000	347200000
KRTAP3-2	1416600000	4445200000	2170600000	530250000	55708000	1162900000	1595500000	6623800000	1407900000	840200000	503940000
SERPINA3	178040000	31551000	34423000	79915000	26249000	76855000	338540000	29522000	11239000	39232000	16658000
C4A;C4B	100690000	24751000	9980900	59555000	9046100	57644000	107990000	12272000	7368400	10247000	1968900
HRNR	131650000	5027600	40698000	62676000	12490000	26100000	18033000	19556000	8169800	19623000	7999900
TGM3	7033200	1995800	15609000	23241000	146120000	12004000	24895000	147270000	203850000	19829000	452540000
KRT33B	361830000	28510000	1343300000	74071000	2645100000	1638300000	1458700000	436280000	2926200000	860280000	6218800000
KRTAP3-3	916580000	2673600000	1909900000	632400000	216140000	1283000000	1037200000	3620200000	965410000	1059700000	1761100000
KRT38	59431000	271740000	77842000	209380000	18220000	24796000	1685000000	41649000	88970000	54086000	37894000
SLC25A11	2993100	2045000	2836900	2769000	0	3417700	10246000	7919100	1142700	1618700	623860
SOD1	9065500	2308800	20401000	0	4469900	9489000	121370000	115170000	2524000	19985000	8672500
RAN	0	19675000	12217000	14134000	62269000	5199700	13639000	24824000	14562000	44229000	14192000
KRTAP2-4;KRTAP2-3	3426400	87345000	75070000	21874000	0	4659600	6349400	29671000	18352000	47730000	72614000
LGALS3	6320700	6611000	1959700	51765000	318910000	0	32581000	1013200	93798000	54772000	227490000
SERPINC1	25303000	10926000	9497800	26193000	0	307300000	104700000	5477100	119030000	7455100	1803600
TXN	13774000	309870000	103910000	4558900	0	24050000	32745000	225890000	43595000	3004100	63904000
LY6G6D	3748500	23892000	7252900	5244900	9469100	0	14292000	15127000	5099600	7558300	4193900
PKP1	46186000	3323100	40770000	9923200	0	49848000	27496000	128770000	102910000	10868000	182980000
PPIA	5472900	63010000	21455000	13090000	0	6718600	17086000	34622000	21150000	48948000	11375000
APOH	107410000	46352000	28593000	83974000	43353000	67666000	109560000	27365000	16219000	28832000	0
GSDMA	0	7152300	7831000	10067000	21969000	6940900	5355700	14247000	5313200	23852000	12356000
APOB	196910000	38050000	23721000	72125000	0	102050000	142970000	7697400	14289000	8869500	3524000
ITIH4	64483000	18704000	0	34575000	18093000	39536000	88680000	7803200	24260000	14516000	3624300
CFB	30607000	11681000	13507000	30348000	0	25309000	34655000	5058900	4116400	13039000	2684500
AHSG	70407000	42678000	23114000	67407000	0	68127000	98941000	29750000	21017000	35180000	2851300
AFM	29621000	6559500	7901700	10202000	0	16060000	24654000	6846700	2944700	3773600	1784800
AZGP1	26936000	4967200	8986200	10100000	0	14131000	15349000	8317000	3417300	4076000	5085700
	10773000	16576000	47644000	41839000	0	9819000	7336900	39438000	57734000	48446000	44518000
APOA1	159850000	23243000	11212000	72514000	0	101980000	186310000	12301000	19698000	19075000	1831100
KRTAP4-6	15079000	49086000	44938000	20000000	0	29924000	19460000	67166000	43140000	23450000	52063000
DCD	58733000	2089700	12936000	9910200	0	21824000	8226100	15172000	8559600	1504400	4611900
HEPHL1	16396000	30480000	10439000	0	8326200	32634000	17284000	98273000	193400000	5123100	550500000
KRT10	59782000	0	215250000	27286000	799800000	28468000	8559800	203650000	884540000	66324000	814910000
KRT36	3523700	0	10869000	13523000	12410000	3201300	0	14229000	11278000	26416000	11528000
KRTAP9-1	17902000	204160000	36726000	0	0	12908000	16444000	61513000	25272000	10545000	14762000
KRTAP13-2	91164000	261350000	121420000	5496900	0	32529000	56516000	285310000	106050000	0	110590000
KRTAP4-4	0	143940000	115210000	37390000	0	78124000	24541000	256240000	111380000	52659000	100100000
KRTAP4-2	0	29297000	22950000	18860000	0	13436000	3496000	55926000	27048000	24170000	15187000
KRT80	8097000	14080000	12975000	7862400	16321000	0	0	35346000	14156000	14840000	22305000
AMBP	25713000	5337800	0	16645000	15796000	20204000	21771000	4746000	0	11218000	3203700
KRTAP9-2	3154700	11193000	16424000	0	0	3834500	2739200	9629500	12848000	2019200	956360
CALML3	38404000	57018000	30705000	0	0	25752000	62785000	61080000	51842000	0	43526000
	50795000	64356000	22778000	57967000	0	51153000	49718000	19984000	8426900	0	0
HSPA2	12341000	3932500	8716600	0	0	5600600	8037900	20916000	48366000	0	93440000
ITIH2	26511000	9593300	0	14282000	0	13528000	17035000	5775600	2910800	8814400	0
TRIM29	2895600	0	17722000	2513900	0	0	1763800	35506000	25724000	2596600	96153000
CALML5	3616900	34381000	7503900	0	0	9843400	14199000	9129400	9536700	0	7436800
KRT31	110040000	0	11414000	2731700	1296000000	0	0	19445000	3334500000	55518000	2777000000
PHB2	2283400	0	7502800	0	4413200	0	13426000	32216000	9562900	0	10496000
VDAC1	872950	0	1096900	0	0	0	10415000	17275000	14451000	1075800	30066000
KRT5	9882900	0	33629000	30671000	0	3002300	0	29155000	20271000	0	51358000
KRTAP10-6	0	86005000	10184000	0	0	0	9105900	15553000	12963000	18648000	11377000
LMNA	3839500	19259000	2682700	0	0	0	8305200	23224000	16281000	0	84279000
SFN	11792000	0	8886600	0	0	13562000	8190300	93598000	145320000	0	146130000
KRT16	34432000	0	9023500	5333200	0	18153000	0	54949000	4755000	0	37260000
LMNB1	0	20918000	4840700	0	0	2464000	8687400	21967000	6750500	0	3884000
HNRNPA1	5239600	4668600	0	0	0	7045600	4154600	12814000	3829200	0	2836300
KRT75	0	132020000	0	0	278600000	100870000	0	28323000	639760000	11822000	1461100000
CLU	22641000	0	10753000	19569000	0	0	19330000	0	4676600	6387200	2694700
SACM1L	0	9599000	2053400	0	0	0	5716500	5156200	2397500	4601300	632690
DSG4	0	0	9718700	0	105290000	6602300	0	47605000	234990000	54665000	446720000
ANXA2;ANXA2P2	0	0	13778000	1960400	0	2332700	8202600	16989000	46099000	0	174810000
SERPINF2	15537000	4540600	0	9547000	0	9859400	14985000	4363000	0	3941300	0
JUP	0	17038000	8408200	0	60934000	38884000	0	38948000	84932000	0	374780000
	0	0	11747000	0	98549000	23720000	0	54067000	272910000	1354000000	267000000
ATP5B	0	0	0	0	247500000	35185000	118230000	6541900	123880000	0	155840000
VDAC2	0	0	0	0	202430000	8108300	0	49160000	50329000	69095000	198820000
CS	1412400	3703600	0	0	0	0	11113000	3028300	3465900	0	21357000
KRTAP10-12	7322400	15904000	58938000	0	0	13351000	0	25339000	17339000	0	0
MUC16	3005500	0	4236800	3821800	0	0	0	0	6332700	2851700	17832000
KRTAP10-9	0	21745000	3259500	0	0	0	2299900	0	4401200	4207200	467990
SELENBP1	0	0	0	1879300	37207000	2869800	0	0	95852000	54270000	591610000
HSP90AA1	0	2746700	2768200	0	0	0	3357100	3538800	5746400	0	6737100
DSTN	0	0	2262300	0	4182300	0	0	4247700	1231700	6146800	1408600
NPC2	0	8353700	4191700	0	0	0	31226000	46297000	3491600	0	7982000
DSG3	0	1470500	0	0	0	3212500	14016000	22546000	1376100	0	1902700
UBA52;RPS27A;UBB;UBC	0	0	8499000	0	24517000	0	0	24998000	33458000	414240000	14177000
SLC25A5	0	3232000	0	0	15393000	0	0	0	3944600	4737300	6123300
HSD17B10	6504400	0	0	0	17101000	0	0	7923400	35764000	0	20573000
ATP5C1	0	0	0	0	20864000	0	0	6581600	12493000	5983200	3257400
LAP3	4091000	0	0	0	41020000	0	0	8690700	31930000	0	64753000
NDUFS1	0	231250000	0	61713000	30900000	9839900	0	142610000	0	0	0
ACOT7	0	12028000	0	0	0	0	7283200	9407300	0	8522600	1028000
KRTAP1-1	0	0	5762900	62243000	0	0	0	0	6520400	8781600	3590100
MIF	0	0	0	0	114650000	5375800	0	4409700	6351600	0	20605000
PKP3	3426600	0	3774000	0	0	0	0	7502800	6134600	0	13564000
LMNB2	2190400	0	0	0	0	0	5731000	0	3213500	4096900	2013800
IGHA1	13902000	0	0	4103000	0	0	6421400	0	0	2174200	1011100
HIST2H3A;HIST3H3;H3F3A;HIST1H3A;H3F3C	0	0	0	0	5259400	0	0	4786300	35319000	5752000	40540000
ARF1;ARF3;ARF5;ARF4	6236700	4173700	0	0	0	0	0	11345000	0	4669100	4827600
KRT14	4476000	0	1844500	0	0	0	0	14102000	11494000	0	27149000
YWHAB	1924600	4253700	0	0	0	2982900	9884200	11705000	0	0	0
APOE	5367200	2036300	0	5569100	0	0	8043700	0	0	1863700	0
FABP4	0	0	0	0	25337000	0	408780000	193720000	0	91065000	138070000
KRTAP10-10	0	8327900	90429000	0	0	0	0	0	46765000	69234000	28299000
NEU2	0	0	2164600	0	0	0	0	3491400	6166300	2438500	8933400
PLG	14827000	3904200	0	6857600	0	7382200	14078000	0	0	0	0
HIST1H4A	0	0	0	0	533630000	0	0	1730900	140640000	48777000	3953400000
ALDH2	0	0	11542000	0	0	0	0	0	3781700	1132800	74316000
CPT1A	5663900	0	0	0	0	0	4626000	0	0	1976600	1942700
DBI	0	0	0	3202200	0	0	2838800	0	4160700	4056000	0
SLC25A6;SLC25A4	0	0	0	0	3265700	0	0	0	1673600	1138500	3841500
OFD1	241960000	0	0	4199900	0	0	0	897370	0	0	1986400
KRTAP10-4	0	15327000	0	0	0	0	3431300	3474200	1528600	0	0
KRTAP13-1	27357000	168810000	0	0	0	0	0	23137000	0	0	15853000
PPL	4350300	0	0	0	0	0	3016000	0	3855800	0	3598300
VTN	3920800	1638400	0	0	0	3402200	4581200	0	0	0	0
GPRC5D	0	0	0	9696400	22339000	0	0	0	0	9266300	4816800
HSPB1	0	0	4088900	0	0	12166000	0	0	16707000	0	26298000
	0	0	0	10884000	0	0	0	49178000	0	16545000	26609000
ATG9B	0	0	3289600	0	0	0	0	0	6026900	4322800	3255300
YWHAB	0	4300500	0	0	0	0	10838000	0	8491700	0	8923000
KRTAP10-5;KRTAP10-1	0	55846000	0	0	0	0	0	16621000	0	12087000	2702700
CRIP2	3072300	0	0	0	0	2032800	0	8734300	0	0	5521000
DSG1	11638000	0	0	3626200	0	0	2490500	0	5193000	0	0
KRTAP4-7	0	8269900	6691800	0	0	0	0	5123700	6923800	0	0
	0	0	0	0	10406000	0	0	17025000	8368200	0	83627000
ORMDL1;ORMDL2	3679500	0	0	0	0	0	11886000	0	2063900	0	754860
FLG2	16387000	0	0	0	0	4061900	0	9969400	0	0	2140000
CAPG	0	2336000	0	0	0	0	4582800	0	1814700	0	3113300
KRTAP1-5	0	0	3796000	0	0	0	0	22760000	9128100	0	8185200
KIF4A;KIF4B	0	0	0	0	26841000	0	0	0	26993000	41833000	11598000
ENO1	0	0	0	0	0	21033000	0	45080000	14180000	0	37458000
KRT7	0	0	23796000	0	196850000	0	0	0	138580000	0	253160000
MDH2	0	0	0	0	0	0	5302100	40203000	2867100	0	39670000
PGK1	0	0	0	0	0	0	0	11525000	6701200	2010800	22818000
UQCRC2	21223000	15174000	0	0	0	0	0	0	0	0	2416300
DLD	6354400	0	0	0	0	0	0	0	2333500	0	2940200
PDIA3	0	4197300	5300900	0	0	0	0	0	3164500	0	0
HNRNPM	0	0	13833000	0	0	0	5628200	0	8266700	0	0
KRTAP9-4	0	0	61418000	0	0	0	6198600	0	10455000	0	0
AHNAK	1806400	0	0	0	0	0	0	0	2119400	0	2439500
KRTAP10-8	0	2980000	0	0	0	0	0	10408000	0	0	8549400
PCBP1	1503800	0	0	0	0	0	0	11230000	4565200	0	0
ACTBL2	0	0	328430000	0	0	0	0	8606000	0	0	215390000
TUBA1B	0	0	0	0	0	8952800	0	0	42915000	0	30277000
A1BG	0	0	0	0	0	24316000	33719000	0	4706500	0	0
ITIH1	7223800	0	0	3468500	0	0	4128200	0	0	0	0
CFH	6015500	0	0	4119200	0	0	0	0	0	4070400	0
	0	12293000	0	0	0	0	3555200	17559000	0	0	0
APCS	3535400	0	0	2926400	0	0	0	0	0	2038000	0
KRT83	0	0	0	0	0	23704000	0	0	39933000	0	182420000
CFI	10562000	4866900	0	0	0	0	8008400	0	0	0	0
LGALS7	0	0	0	0	0	9849600	0	0	108140000	0	105850000
SLC9C1	0	0	1574300	0	0	0	0	0	29454000	0	13023000
HSPD1	0	0	0	0	0	0	0	5974800	18103000	0	50079000
ATP5A1	0	0	0	0	0	0	0	21213000	25379000	0	87831000
LDHB	0	0	0	0	0	0	0	7565900	5796200	0	78781000
TPI1	0	0	0	0	0	0	0	14474000	4716500	0	120050000
HIST1H1B	0	0	0	0	0	0	1608000	0	4400700	0	15428000
RPS13	0	0	0	0	0	0	0	0	2461300	2137600	2380900
LYG2	0	0	0	0	0	0	0	44426000	9600800	0	27885000
LAMP1	0	0	0	0	0	0	0	18656000	18139000	0	4070700
PLCD1	0	0	0	0	0	0	0	3155500	8435400	0	10051000
YWHAQ	0	0	0	0	0	0	0	3425900	1499700	0	4647900
GJA1	0	0	0	0	0	0	0	3075600	2486000	0	3548600
	0	0	0	0	0	0	0	7939500	6726600	0	7275200
HSPA8	0	0	0	0	0	0	0	30860000	7907100	0	14217000
RTN3	0	0	0	0	0	0	31988000	101540000	0	0	8356900

[truncated: 2 more sheets: 1L, 1M]
