# Supplementary material for: Quantitative mapping of human hair greying and reversal in relation to life stress
Source: eLife. 2021 Jun 22;10:e67437. doi: 10.7554/eLife.67437 (PMC8219384; doi:10.7554/eLife.67437)
Supplement: Figure 2—figure supplement 1—source data 1. [file elife-67437-fig2-figsupp1-data1.xlsx]

## Sheet: A
Note: Hairs were scanned from root (0 cm) to tip, but are graphed from tip (as 0 cm) to root. Therefore, all hairs are reversed when graphed.
Slow			Medium			Rapid
Distance (cm)	Intensity (A.U.)		Distance (cm)	Intensity (A.U.)		Distance (cm)	Intensity (A.U.)
0	79.91		0	153.95		0	65.12
0.0008	79.87		0.0008	153.95		0.0008	65.19
0.0016	79.81		0.00159	153.95		0.00159	65.23
0.0024	79.76		0.00239	153.96		0.00239	65.25
0.0032	79.69		0.00319	153.94		0.00319	65.23
0.004	79.61		0.00398	153.92		0.00398	65.18
0.0048	79.53		0.00478	153.89		0.00478	65.12
0.0056	79.45		0.00558	153.87		0.00558	65.06
0.0064	79.37		0.00637	153.87		0.00637	65.01
0.0072	79.29		0.00717	153.86		0.00717	64.98
0.008	79.21		0.00797	153.84		0.00797	64.94
0.0088	79.16		0.00876	153.83		0.00876	64.89
0.0096	79.11		0.00956	153.82		0.00956	64.83
0.0104	79.08		0.01036	153.8		0.01036	64.78
0.0112	79.12		0.01115	153.8		0.01115	64.72
0.012	79.2		0.01195	153.78		0.01195	64.66
0.0127	79.29		0.01275	153.77		0.01275	64.61
0.0135	79.36		0.01354	153.77		0.01354	64.56
0.0143	79.42		0.01434	153.78		0.01434	64.51
0.0151	79.45		0.01514	153.79		0.01514	64.44
0.0159	79.46		0.01593	153.82		0.01593	64.35
0.0167	79.45		0.01673	153.85		0.01673	64.22
0.0175	79.44		0.01753	153.85		0.01753	64.08
0.0183	79.45		0.01832	153.84		0.01832	63.95
0.0191	79.48		0.01912	153.79		0.01912	63.85
0.0199	79.5		0.01992	153.7		0.01992	63.78
0.0207	79.53		0.02071	153.59		0.02071	63.76
0.0215	79.58		0.02151	153.48		0.02151	63.75
0.0223	79.61		0.02231	153.38		0.02231	63.77
0.0231	79.63		0.0231	153.34		0.0231	63.79
0.0239	79.64		0.0239	153.32		0.0239	63.77
0.0247	79.65		0.0247	153.36		0.0247	63.75
0.0255	79.64		0.02549	153.44		0.02549	63.71
0.0263	79.63		0.02629	153.52		0.02629	63.68
0.0271	79.61		0.02709	153.61		0.02709	63.66
0.0279	79.57		0.02788	153.7		0.02788	63.65
0.0287	79.51		0.02868	153.75		0.02868	63.64
0.0295	79.46		0.02948	153.78		0.02948	63.63
0.0303	79.41		0.03027	153.82		0.03027	63.6
0.0311	79.38		0.03107	153.84		0.03107	63.57
0.0319	79.38		0.03187	153.86		0.03187	63.53
0.0327	79.44		0.03266	153.85		0.03266	63.46
0.0335	79.51		0.03346	153.84		0.03346	63.39
0.0343	79.54		0.03426	153.84		0.03426	63.32
0.0351	79.55		0.03505	153.84		0.03505	63.24
0.0359	79.52		0.03585	153.83		0.03585	63.16
0.0366	79.49		0.03665	153.81		0.03665	63.07
0.0374	79.45		0.03744	153.78		0.03744	62.97
0.0382	79.43		0.03824	153.8		0.03824	62.86
0.039	79.41		0.03904	153.83		0.03904	62.76
0.0398	79.39		0.03983	153.85		0.03983	62.69
0.0406	79.37		0.04063	153.87		0.04063	62.63
0.0414	79.35		0.04143	153.89		0.04143	62.59
0.0422	79.33		0.04222	153.94		0.04222	62.57
0.043	79.3		0.04302	154.01		0.04302	62.58
0.0438	79.3		0.04382	154.08		0.04382	62.61
0.0446	79.26		0.04461	154.14		0.04461	62.66
0.0454	79.21		0.04541	154.19		0.04541	62.73
0.0462	79.14		0.04621	154.25		0.04621	62.8
0.047	79.06		0.047	154.31		0.047	62.86
0.0478	78.97		0.0478	154.37		0.0478	62.91
0.0486	78.89		0.0486	154.43		0.0486	62.95
0.0494	78.82		0.04939	154.49		0.04939	63
0.0502	78.76		0.05019	154.55		0.05019	63.06
0.051	78.71		0.05099	154.6		0.05099	63.12
0.0518	78.67		0.05178	154.61		0.05178	63.17
0.0526	78.65		0.05258	154.62		0.05258	63.24
0.0534	78.61		0.05338	154.64		0.05338	63.31
0.0542	78.56		0.05417	154.68		0.05417	63.36
0.055	78.47		0.05497	154.75		0.05497	63.38
0.0558	78.37		0.05577	154.83		0.05577	63.39
0.0566	78.27		0.05656	154.95		0.05656	63.37
0.0574	78.16		0.05736	155.07		0.05736	63.33
0.0582	78.05		0.05816	155.16		0.05816	63.24
0.059	77.98		0.05895	155.23		0.05895	63.13
0.0598	77.91		0.05975	155.28		0.05975	63.01
0.0605	77.85		0.06055	155.33		0.06055	62.89
0.0613	77.77		0.06134	155.35		0.06134	62.76
0.0621	77.69		0.06214	155.4		0.06214	62.64
0.0629	77.62		0.06294	155.44		0.06294	62.51
0.0637	77.54		0.06373	155.46		0.06373	62.36
0.0645	77.44		0.06453	155.47		0.06453	62.18
0.0653	77.3		0.06533	155.48		0.06533	61.96
0.0661	77.14		0.06612	155.46		0.06612	61.73
0.0669	76.97		0.06692	155.43		0.06692	61.51
0.0677	76.79		0.06772	155.4		0.06772	61.32
0.0685	76.62		0.06851	155.39		0.06851	61.14
0.0693	76.49		0.06931	155.4		0.06931	60.96
0.0701	76.39		0.07011	155.4		0.07011	60.77
0.0709	76.32		0.07091	155.38		0.07091	60.57
0.0717	76.25		0.0717	155.35		0.0717	60.36
0.0725	76.19		0.0725	155.33		0.0725	60.13
0.0733	76.12		0.0733	155.33		0.0733	59.9
0.0741	76.06		0.07409	155.34		0.07409	59.65
0.0749	75.99		0.07489	155.34		0.07489	59.41
0.0757	75.93		0.07569	155.36		0.07569	59.21
0.0765	75.86		0.07648	155.36		0.07648	59.05
0.0773	75.79		0.07728	155.36		0.07728	58.91
0.0781	75.73		0.07808	155.35		0.07808	58.78
0.0789	75.68		0.07887	155.35		0.07887	58.63
0.0797	75.63		0.07967	155.33		0.07967	58.48
0.0805	75.6		0.08047	155.31		0.08047	58.34
0.0813	75.59		0.08126	155.29		0.08126	58.22
0.0821	75.6		0.08206	155.3		0.08206	58.11
0.0829	75.64		0.08286	155.32		0.08286	58.03
0.0837	75.66		0.08365	155.35		0.08365	57.97
0.0844	75.66		0.08445	155.4		0.08445	57.92
0.0852	75.64		0.08525	155.44		0.08525	57.88
0.086	75.61		0.08604	155.47		0.08604	57.85
0.0868	75.57		0.08684	155.51		0.08684	57.83
0.0876	75.54		0.08764	155.56		0.08764	57.83
0.0884	75.5		0.08843	155.59		0.08843	57.85
0.0892	75.46		0.08923	155.62		0.08923	57.88
0.09	75.42		0.09003	155.65		0.09003	57.92
0.0908	75.38		0.09082	155.67		0.09082	57.97
0.0916	75.34		0.09162	155.71		0.09162	58.01
0.0924	75.3		0.09242	155.75		0.09242	58.03
0.0932	75.26		0.09321	155.79		0.09321	58.04
0.094	75.21		0.09401	155.82		0.09401	58.03
0.0948	75.18		0.09481	155.85		0.09481	58.01
0.0956	75.17		0.0956	155.9		0.0956	57.98
0.0964	75.16		0.0964	155.95		0.0964	57.96
0.0972	75.17		0.0972	156.02		0.0972	57.93
0.098	75.23		0.09799	156.08		0.09799	57.89
0.0988	75.34		0.09879	156.17		0.09879	57.83
0.0996	75.54		0.09959	156.29		0.09959	57.77
0.1004	75.76		0.10038	156.42		0.10038	57.71
0.1012	75.93		0.10118	156.55		0.10118	57.65
0.102	76.06		0.10198	156.66		0.10198	57.56
0.1028	76.16		0.10277	156.7		0.10277	57.46
0.1036	76.21		0.10357	156.71		0.10357	57.37
0.1044	76.23		0.10437	156.66		0.10437	57.28
0.1052	76.23		0.10516	156.59		0.10516	57.2
0.106	76.22		0.10596	156.54		0.10596	57.12
0.1068	76.21		0.10676	156.48		0.10676	57.04
0.1076	76.22		0.10755	156.45		0.10755	56.97
0.1083	76.26		0.10835	156.41		0.10835	56.91
0.1091	76.31		0.10915	156.38		0.10915	56.85
0.1099	76.36		0.10994	156.36		0.10994	56.8
0.1107	76.4		0.11074	156.34		0.11074	56.75
0.1115	76.42		0.11154	156.3		0.11154	56.71
0.1123	76.42		0.11233	156.26		0.11233	56.68
0.1131	76.41		0.11313	156.19		0.11313	56.64
0.1139	76.44		0.11393	156.11		0.11393	56.59
0.1147	76.47		0.11472	156.03		0.11472	56.54
0.1155	76.52		0.11552	155.96		0.11552	56.48
0.1163	76.58		0.11632	155.89		0.11632	56.42
0.1171	76.65		0.11711	155.82		0.11711	56.36
0.1179	76.7		0.11791	155.72		0.11791	56.32
0.1187	76.76		0.11871	155.62		0.11871	56.29
0.1195	76.82		0.1195	155.55		0.1195	56.27
0.1203	76.88		0.1203	155.51		0.1203	56.25
0.1211	76.94		0.1211	155.47		0.1211	56.22
0.1219	77		0.12189	155.43		0.12189	56.18
0.1227	77.08		0.12269	155.4		0.12269	56.13
0.1235	77.17		0.12349	155.35		0.12349	56.06
0.1243	77.3		0.12428	155.28		0.12428	55.98
0.1251	77.45		0.12508	155.2		0.12508	55.88
0.1259	77.62		0.12588	155.09		0.12588	55.78
0.1267	77.79		0.12667	154.96		0.12667	55.7
0.1275	77.94		0.12747	154.84		0.12747	55.62
0.1283	78.08		0.12827	154.71		0.12827	55.56
0.1291	78.2		0.12906	154.59		0.12906	55.49
0.1299	78.3		0.12986	154.47		0.12986	55.42
0.1307	78.4		0.13066	154.36		0.13066	55.35
0.1315	78.5		0.13145	154.26		0.13145	55.29
0.1322	78.59		0.13225	154.2		0.13225	55.25
0.133	78.68		0.13305	154.14		0.13305	55.21
0.1338	78.75		0.13384	154.07		0.13384	55.18
0.1346	78.83		0.13464	153.98		0.13464	55.16
0.1354	78.92		0.13544	153.87		0.13544	55.14
0.1362	79.01		0.13623	153.73		0.13623	55.14
0.137	79.1		0.13703	153.57		0.13703	55.16
0.1378	79.2		0.13783	153.41		0.13783	55.21
0.1386	79.3		0.13862	153.27		0.13862	55.26
0.1394	79.39		0.13942	153.14		0.13942	55.31
0.1402	79.47		0.14022	152.99		0.14022	55.35
0.141	79.52		0.14101	152.87		0.14101	55.37
0.1418	79.55		0.14181	152.76		0.14181	55.37
0.1426	79.57		0.14261	152.66		0.14261	55.36
0.1434	79.61		0.1434	152.58		0.1434	55.36
0.1442	79.68		0.1442	152.53		0.1442	55.36
0.145	79.8		0.145	152.5		0.145	55.38
0.1458	79.95		0.14579	152.49		0.14579	55.4
0.1466	80.11		0.14659	152.49		0.14659	55.44
0.1474	80.27		0.14739	152.49		0.14739	55.47
0.1482	80.41		0.14818	152.48		0.14818	55.51
0.149	80.54		0.14898	152.47		0.14898	55.56
0.1498	80.65		0.14978	152.48		0.14978	55.63
0.1506	80.76		0.15057	152.5		0.15057	55.71
0.1514	80.88		0.15137	152.54		0.15137	55.8
0.1522	80.99		0.15217	152.58		0.15217	55.9
0.153	81.1		0.15296	152.61		0.15296	56.01
0.1538	81.2		0.15376	152.63		0.15376	56.13
0.1546	81.3		0.15456	152.64		0.15456	56.23
0.1554	81.38		0.15535	152.64		0.15535	56.31
0.1562	81.44		0.15615	152.66		0.15615	56.36
0.1569	81.51		0.15695	152.67		0.15695	56.39
0.1577	81.58		0.15774	152.67		0.15774	56.43
0.1585	81.63		0.15854	152.65		0.15854	56.47
0.1593	81.68		0.15934	152.64		0.15934	56.51
0.1601	81.73		0.16013	152.6		0.16013	56.56
0.1609	81.77		0.16093	152.54		0.16093	56.63
0.1617	81.79		0.16173	152.46		0.16173	56.72
0.1625	81.79		0.16252	152.38		0.16252	56.83
0.1633	81.78		0.16332	152.29		0.16332	56.94
0.1641	81.79		0.16412	152.19		0.16412	57.09
0.1649	81.79		0.16491	152.08		0.16491	57.25
0.1657	81.81		0.16571	151.97		0.16571	57.43
0.1665	81.83		0.16651	151.87		0.16651	57.62
0.1673	81.84		0.1673	151.77		0.1673	57.82
0.1681	81.82		0.1681	151.67		0.1681	58.01
0.1689	81.8		0.1689	151.56		0.1689	58.2
0.1697	81.77		0.16969	151.45		0.16969	58.38
0.1705	81.74		0.17049	151.36		0.17049	58.55
0.1713	81.73		0.17129	151.27		0.17129	58.73
0.1721	81.75		0.17208	151.19		0.17208	58.9
0.1729	81.78		0.17288	151.12		0.17288	59.05
0.1737	81.85		0.17368	151.04		0.17368	59.19
0.1745	81.91		0.17447	150.95		0.17447	59.32
0.1753	81.93		0.17527	150.86		0.17527	59.46
0.1761	81.94		0.17607	150.78		0.17607	59.61
0.1769	81.94		0.17686	150.72		0.17686	59.77
0.1777	81.9		0.17766	150.66		0.17766	59.93
0.1785	81.81		0.17846	150.63		0.17846	60.1
0.1793	81.63		0.17925	150.6		0.17925	60.26
0.1801	81.42		0.18005	150.57		0.18005	60.41
0.1808	81.22		0.18085	150.54		0.18085	60.57
0.1816	81.07		0.18164	150.52		0.18164	60.74
0.1824	80.95		0.18244	150.51		0.18244	60.91
0.1832	80.89		0.18324	150.49		0.18324	61.09
0.184	80.87		0.18403	150.45		0.18403	61.29
0.1848	80.89		0.18483	150.38		0.18483	61.49
0.1856	80.93		0.18563	150.29		0.18563	61.69
0.1864	80.98		0.18642	150.19		0.18642	61.88
0.1872	81.01		0.18722	150.06		0.18722	62.04
0.188	81.02		0.18802	149.93		0.18802	62.16
0.1888	81.02		0.18881	149.81		0.18881	62.26
0.1896	81.01		0.18961	149.69		0.18961	62.34
0.1904	81		0.19041	149.56		0.19041	62.43
0.1912	80.99		0.1912	149.42		0.1912	62.5
0.192	80.98		0.192	149.29		0.192	62.56
0.1928	80.96		0.1928	149.18		0.1928	62.62
0.1936	80.91		0.19359	149.08		0.19359	62.67
0.1944	80.84		0.19439	148.99		0.19439	62.72
0.1952	80.76		0.19519	148.92		0.19519	62.77
0.196	80.67		0.19598	148.84		0.19598	62.83
0.1968	80.58		0.19678	148.78		0.19678	62.91
0.1976	80.5		0.19758	148.71		0.19758	63.01
0.1984	80.44		0.19837	148.64		0.19837	63.13
0.1992	80.42		0.19917	148.56		0.19917	63.27
0.2	80.39		0.19997	148.45		0.19997	63.44
0.2008	80.36		0.20076	148.36		0.20076	63.63
0.2016	80.32		0.20156	148.26		0.20156	63.83
0.2024	80.25		0.20236	148.15		0.20236	64.04
0.2032	80.16		0.20315	148.07		0.20315	64.26
0.204	80.06		0.20395	148.01		0.20395	64.49
0.2047	79.98		0.20475	147.98		0.20475	64.74
0.2055	79.92		0.20554	147.97		0.20554	65
0.2063	79.89		0.20634	147.98		0.20634	65.24
0.2071	79.86		0.20714	147.98		0.20714	65.48
0.2079	79.83		0.20793	147.99		0.20793	65.7
0.2087	79.78		0.20873	148.01		0.20873	65.93
0.2095	79.73		0.20953	148.05		0.20953	66.16
0.2103	79.68		0.21033	148.09		0.21033	66.4
0.2111	79.62		0.21112	148.16		0.21112	66.64
0.2119	79.57		0.21192	148.19		0.21192	66.86
0.2127	79.54		0.21272	148.22		0.21272	67.1
0.2135	79.52		0.21351	148.24		0.21351	67.34
0.2143	79.49		0.21431	148.29		0.21431	67.62
0.2151	79.46		0.21511	148.36		0.21511	67.9
0.2159	79.44		0.2159	148.44		0.2159	68.16
0.2167	79.42		0.2167	148.55		0.2167	68.39
0.2175	79.39		0.2175	148.67		0.2175	68.59
0.2183	79.35		0.21829	148.77		0.21829	68.74
0.2191	79.31		0.21909	148.86		0.21909	68.85
0.2199	79.27		0.21989	148.97		0.21989	68.95
0.2207	79.25		0.22068	149.06		0.22068	69.06
0.2215	79.23		0.22148	149.11		0.22148	69.18
0.2223	79.22		0.22228	149.16		0.22228	69.32
0.2231	79.19		0.22307	149.22		0.22307	69.47
0.2239	79.15		0.22387	149.26		0.22387	69.61
0.2247	79.08		0.22467	149.29		0.22467	69.71
0.2255	78.98		0.22546	149.32		0.22546	69.77
0.2263	78.87		0.22626	149.35		0.22626	69.77
0.2271	78.76		0.22706	149.37		0.22706	69.74
0.2279	78.65		0.22785	149.38		0.22785	69.69
0.2286	78.54		0.22865	149.36		0.22865	69.62
0.2294	78.46		0.22945	149.32		0.22945	69.54
0.2302	78.39		0.23024	149.27		0.23024	69.45
0.231	78.33		0.23104	149.22		0.23104	69.36
0.2318	78.28		0.23184	149.14		0.23184	69.27
0.2326	78.26		0.23263	149.07		0.23263	69.19
0.2334	78.26		0.23343	149		0.23343	69.13
0.2342	78.26		0.23423	148.93		0.23423	69.1
0.235	78.26		0.23502	148.88		0.23502	69.08
0.2358	78.28		0.23582	148.87		0.23582	69.06
0.2366	78.29		0.23662	148.88		0.23662	69.05
0.2374	78.31		0.23741	148.91		0.23741	69.01
0.2382	78.34		0.23821	148.95		0.23821	68.98
0.239	78.37		0.23901	148.98		0.23901	68.95
0.2398	78.38		0.2398	149		0.2398	68.93
0.2406	78.39		0.2406	149.02		0.2406	68.89
0.2414	78.41		0.2414	149.04		0.2414	68.85
0.2422	78.45		0.24219	149.07		0.24219	68.79
0.243	78.53		0.24299	149.11		0.24299	68.72
0.2438	78.62		0.24379	149.18		0.24379	68.62
0.2446	78.7		0.24458	149.26		0.24458	68.52
0.2454	78.77		0.24538	149.36		0.24538	68.4
0.2462	78.84		0.24618	149.46		0.24618	68.25
0.247	78.9		0.24697	149.56		0.24697	68.09
0.2478	78.98		0.24777	149.69		0.24777	67.91
0.2486	79.06		0.24857	149.84		0.24857	67.71
0.2494	79.13		0.24936	149.99		0.24936	67.51
0.2502	79.21		0.25016	150.12		0.25016	67.31
0.251	79.27		0.25096	150.25		0.25096	67.12
0.2518	79.32		0.25175	150.36		0.25175	66.96
0.2525	79.38		0.25255	150.45		0.25255	66.81
0.2533	79.4		0.25335	150.52		0.25335	66.68
0.2541	79.41		0.25414	150.58		0.25414	66.56
0.2549	79.44		0.25494	150.64		0.25494	66.43
0.2557	79.48		0.25574	150.7		0.25574	66.29
0.2565	79.53		0.25653	150.75		0.25653	66.14
0.2573	79.57		0.25733	150.81		0.25733	66.01
0.2581	79.6		0.25813	150.84		0.25813	65.9
0.2589	79.63		0.25892	150.87		0.25892	65.82
0.2597	79.65		0.25972	150.91		0.25972	65.74
0.2605	79.69		0.26052	150.94		0.26052	65.66
0.2613	79.75		0.26131	150.98		0.26131	65.59
0.2621	79.84		0.26211	151		0.26211	65.52
0.2629	79.95		0.26291	151.02		0.26291	65.45
0.2637	80.06		0.2637	151.05		0.2637	65.35
0.2645	80.19		0.2645	151.1		0.2645	65.24
0.2653	80.32		0.2653	151.14		0.2653	65.12
0.2661	80.45		0.26609	151.2		0.26609	64.99
0.2669	80.57		0.26689	151.27		0.26689	64.88
0.2677	80.69		0.26769	151.37		0.26769	64.8
0.2685	80.8		0.26848	151.48		0.26848	64.73
0.2693	80.92		0.26928	151.6		0.26928	64.68
0.2701	81.03		0.27008	151.74		0.27008	64.61
0.2709	81.14		0.27087	151.91		0.27087	64.55
0.2717	81.27		0.27167	152.07		0.27167	64.5
0.2725	81.42		0.27247	152.24		0.27247	64.46
0.2733	81.57		0.27326	152.43		0.27326	64.43
0.2741	81.73		0.27406	152.61		0.27406	64.41
0.2749	81.88		0.27486	152.78		0.27486	64.4
0.2757	82.04		0.27565	152.95		0.27565	64.39
0.2764	82.2		0.27645	153.09		0.27645	64.37
0.2772	82.34		0.27725	153.22		0.27725	64.32
0.278	82.45		0.27804	153.33		0.27804	64.26
0.2788	82.53		0.27884	153.42		0.27884	64.18
0.2796	82.62		0.27964	153.5		0.27964	64.07
0.2804	82.68		0.28043	153.58		0.28043	63.93
0.2812	82.71		0.28123	153.65		0.28123	63.77
0.282	82.75		0.28203	153.72		0.28203	63.6
0.2828	82.77		0.28282	153.77		0.28282	63.41
0.2836	82.78		0.28362	153.82		0.28362	63.22
0.2844	82.79		0.28442	153.83		0.28442	63.02
0.2852	82.8		0.28521	153.84		0.28521	62.82
0.286	82.8		0.28601	153.84		0.28601	62.63
0.2868	82.83		0.28681	153.84		0.28681	62.44
0.2876	82.87		0.2876	153.82		0.2876	62.24
0.2884	82.93		0.2884	153.8		0.2884	62.03
0.2892	82.99		0.2892	153.76		0.2892	61.82
0.29	83.02		0.28999	153.72		0.28999	61.59
0.2908	83.04		0.29079	153.66		0.29079	61.34
0.2916	83.04		0.29159	153.61		0.29159	61.1
0.2924	83.02		0.29238	153.56		0.29238	60.82
0.2932	83.02		0.29318	153.5		0.29318	60.54
0.294	83.04		0.29398	153.44		0.29398	60.24
0.2948	83.07		0.29477	153.38		0.29477	59.95
0.2956	83.08		0.29557	153.32		0.29557	59.67
0.2964	83.09		0.29637	153.24		0.29637	59.41
0.2972	83.11		0.29716	153.15		0.29716	59.17
0.298	83.13		0.29796	153.08		0.29796	58.99
0.2988	83.16		0.29876	153		0.29876	58.85
0.2996	83.21		0.29955	152.93		0.29955	58.72
0.3004	83.27		0.30035	152.89		0.30035	58.59
0.3011	83.33		0.30115	152.88		0.30115	58.45
0.3019	83.4		0.30194	152.9		0.30194	58.29
0.3027	83.48		0.30274	152.92		0.30274	58.12
0.3035	83.58		0.30354	152.96		0.30354	57.95
0.3043	83.69		0.30433	152.98		0.30433	57.81
0.3051	83.79		0.30513	153		0.30513	57.72
0.3059	83.86		0.30593	153.04		0.30593	57.66
0.3067	83.93		0.30672	153.09		0.30672	57.63
0.3075	84		0.30752	153.16		0.30752	57.6
0.3083	84.08		0.30832	153.23		0.30832	57.57
0.3091	84.17		0.30911	153.3		0.30911	57.54
0.3099	84.28		0.30991	153.37		0.30991	57.52
0.3107	84.39		0.31071	153.42		0.31071	57.51
0.3115	84.51		0.3115	153.48		0.3115	57.49
0.3123	84.6		0.3123	153.53		0.3123	57.47
0.3131	84.67		0.3131	153.59		0.3131	57.42
0.3139	84.73		0.31389	153.66		0.31389	57.36
0.3147	84.79		0.31469	153.73		0.31469	57.29
0.3155	84.85		0.31549	153.77		0.31549	57.23
0.3163	84.92		0.31628	153.8		0.31628	57.17
0.3171	84.98		0.31708	153.82		0.31708	57.13
0.3179	85.05		0.31788	153.83		0.31788	57.09
0.3187	85.13		0.31867	153.83		0.31867	57.05
0.3195	85.24		0.31947	153.84		0.31947	56.99
0.3203	85.34		0.32027	153.82		0.32027	56.92
0.3211	85.43		0.32106	153.78		0.32106	56.84
0.3219	85.49		0.32186	153.72		0.32186	56.77
0.3227	85.51		0.32266	153.66		0.32266	56.72
0.3235	85.51		0.32345	153.59		0.32345	56.67
0.3243	85.54		0.32425	153.52		0.32425	56.61
0.325	85.56		0.32505	153.44		0.32505	56.54
0.3258	85.61		0.32584	153.38		0.32584	56.47
0.3266	85.66		0.32664	153.33		0.32664	56.38
0.3274	85.69		0.32744	153.28		0.32744	56.31
0.3282	85.71		0.32823	153.22		0.32823	56.26
0.329	85.74		0.32903	153.18		0.32903	56.21
0.3298	85.73		0.32983	153.16		0.32983	56.16
0.3306	85.73		0.33062	153.15		0.33062	56.1
0.3314	85.74		0.33142	153.14		0.33142	56.02
0.3322	85.76		0.33222	153.13		0.33222	55.94
0.333	85.81		0.33301	153.14		0.33301	55.86
0.3338	85.87		0.33381	153.14		0.33381	55.8
0.3346	85.92		0.33461	153.09		0.33461	55.76
0.3354	85.97		0.3354	153.02		0.3354	55.75
0.3362	86		0.3362	152.94		0.3362	55.75
0.337	86.03		0.337	152.86		0.337	55.74
0.3378	86.06		0.33779	152.8		0.33779	55.72
0.3386	86.12		0.33859	152.78		0.33859	55.69
0.3394	86.21		0.33939	152.77		0.33939	55.65
0.3402	86.31		0.34018	152.76		0.34018	55.6
0.341	86.4		0.34098	152.74		0.34098	55.54
0.3418	86.47		0.34178	152.74		0.34178	55.49
0.3426	86.52		0.34257	152.76		0.34257	55.45
0.3434	86.55		0.34337	152.8		0.34337	55.42
0.3442	86.54		0.34417	152.85		0.34417	55.4
0.345	86.52		0.34496	152.93		0.34496	55.38
0.3458	86.47		0.34576	153.02		0.34576	55.38
0.3466	86.44		0.34656	153.1		0.34656	55.38
0.3474	86.42		0.34736	153.16		0.34736	55.39
0.3482	86.42		0.34815	153.21		0.34815	55.42
0.3489	86.39		0.34895	153.24		0.34895	55.44
0.3497	86.35		0.34975	153.26		0.34975	55.47
0.3505	86.31		0.35054	153.25		0.35054	55.5
0.3513	86.24		0.35134	153.26		0.35134	55.53
0.3521	86.16		0.35214	153.26		0.35214	55.56
0.3529	86.1		0.35293	153.26		0.35293	55.59
0.3537	86.04		0.35373	153.26		0.35373	55.63
0.3545	86		0.35453	153.25		0.35453	55.67
0.3553	85.96		0.35532	153.24		0.35532	55.71
0.3561	85.95		0.35612	153.26		0.35612	55.73
0.3569	85.96		0.35692	153.28		0.35692	55.73
0.3577	85.99		0.35771	153.3		0.35771	55.71
0.3585	86.03		0.35851	153.32		0.35851	55.69
0.3593	86.07		0.35931	153.35		0.35931	55.68
0.3601	86.12		0.3601	153.33		0.3601	55.67
0.3609	86.21		0.3609	153.32		0.3609	55.66
0.3617	86.29		0.3617	153.3		0.3617	55.65
0.3625	86.39		0.36249	153.28		0.36249	55.65
0.3633	86.5		0.36329	153.26		0.36329	55.63
0.3641	86.61		0.36409	153.27		0.36409	55.61
0.3649	86.69		0.36488	153.28		0.36488	55.6
0.3657	86.77		0.36568	153.31		0.36568	55.59
0.3665	86.85		0.36648	153.35		0.36648	55.58
0.3673	86.94		0.36727	153.41		0.36727	55.6
0.3681	87.02		0.36807	153.46		0.36807	55.63
0.3689	87.1		0.36887	153.52		0.36887	55.66
0.3697	87.2		0.36966	153.57		0.36966	55.71
0.3705	87.31		0.37046	153.62		0.37046	55.77
0.3713	87.43		0.37126	153.68		0.37126	55.81
0.3721	87.56		0.37205	153.75		0.37205	55.87
0.3728	87.69		0.37285	153.84		0.37285	55.93
0.3736	87.82		0.37365	153.92		0.37365	56
0.3744	87.92		0.37444	154		0.37444	56.08
0.3752	88.01		0.37524	154.07		0.37524	56.16
0.376	88.09		0.37604	154.13		0.37604	56.24
0.3768	88.14		0.37683	154.19		0.37683	56.32
0.3776	88.17		0.37763	154.22		0.37763	56.39
0.3784	88.19		0.37843	154.24		0.37843	56.47
0.3792	88.21		0.37922	154.25		0.37922	56.56
0.38	88.24		0.38002	154.24		0.38002	56.65
0.3808	88.29		0.38082	154.24		0.38082	56.72
0.3816	88.33		0.38161	154.22		0.38161	56.8
0.3824	88.35		0.38241	154.18		0.38241	56.88
0.3832	88.33		0.38321	154.13		0.38321	56.97
0.384	88.31		0.384	154.08		0.384	57.05
0.3848	88.32		0.3848	154.05		0.3848	57.11
0.3856	88.36		0.3856	154.01		0.3856	57.18
0.3864	88.41		0.38639	153.98		0.38639	57.26
0.3872	88.45		0.38719	153.95		0.38719	57.38
0.388	88.47		0.38799	153.95		0.38799	57.55
0.3888	88.44		0.38878	153.97		0.38878	57.74
0.3896	88.38		0.38958	153.98		0.38958	57.93
0.3904	88.34		0.39038	154.02		0.39038	58.1
0.3912	88.32		0.39117	154.08		0.39117	58.29
0.392	88.34		0.39197	154.16		0.39197	58.46
0.3928	88.37		0.39277	154.24		0.39277	58.65
0.3936	88.39		0.39356	154.31		0.39356	58.83
0.3944	88.41		0.39436	154.36		0.39436	59.02
0.3952	88.4		0.39516	154.38		0.39516	59.22
0.396	88.36		0.39595	154.4		0.39595	59.41
0.3967	88.29		0.39675	154.41		0.39675	59.6
0.3975	88.21		0.39755	154.44		0.39755	59.79
0.3983	88.13		0.39834	154.48		0.39834	59.99
0.3991	88.04		0.39914	154.53		0.39914	60.18
0.3999	87.97		0.39994	154.6		0.39994	60.4
0.4007	87.91		0.40073	154.7		0.40073	60.61
0.4015	87.87		0.40153	154.79		0.40153	60.82
0.4023	87.86		0.40233	154.88		0.40233	61.03
0.4031	87.87		0.40312	154.95		0.40312	61.24
0.4039	87.89		0.40392	155.03		0.40392	61.44
0.4047	87.95		0.40472	155.11		0.40472	61.64
0.4055	88.01		0.40551	155.16		0.40551	61.84
0.4063	88.09		0.40631	155.21		0.40631	62.04
0.4071	88.21		0.40711	155.25		0.40711	62.23
0.4079	88.36		0.4079	155.28		0.4079	62.41
0.4087	88.5		0.4087	155.3		0.4087	62.58
0.4095	88.66		0.4095	155.28		0.4095	62.75
0.4103	88.8		0.41029	155.25		0.41029	62.94
0.4111	88.91		0.41109	155.21		0.41109	63.13
0.4119	88.98		0.41189	155.16		0.41189	63.32
0.4127	89		0.41268	155.1		0.41268	63.49
0.4135	89		0.41348	155.06		0.41348	63.65
0.4143	89.01		0.41428	155.05		0.41428	63.81
0.4151	89.03		0.41507	155.06		0.41507	63.94
0.4159	89.07		0.41587	155.07		0.41587	64.06
0.4167	89.11		0.41667	155.09		0.41667	64.17
0.4175	89.14		0.41746	155.1		0.41746	64.27
0.4183	89.14		0.41826	155.08		0.41826	64.36
0.4191	89.11		0.41906	155.06		0.41906	64.47
0.4199	89.06		0.41985	155.08		0.41985	64.58
0.4207	88.99		0.42065	155.1		0.42065	64.69
0.4214	88.9		0.42145	155.12		0.42145	64.79
0.4222	88.8		0.42224	155.13		0.42224	64.88
0.423	88.71		0.42304	155.11		0.42304	64.98
0.4238	88.65		0.42384	155.09		0.42384	65.08
0.4246	88.6		0.42463	155.04		0.42463	65.17
0.4254	88.57		0.42543	154.98		0.42543	65.26
0.4262	88.55		0.42623	154.91		0.42623	65.34
0.427	88.55		0.42702	154.85		0.42702	65.41
0.4278	88.54		0.42782	154.77		0.42782	65.48
0.4286	88.57		0.42862	154.71		0.42862	65.55
0.4294	88.62		0.42941	154.66		0.42941	65.62
0.4302	88.66		0.43021	154.63		0.43021	65.68
0.431	88.72		0.43101	154.59		0.43101	65.72
0.4318	88.79		0.4318	154.55		0.4318	65.76
0.4326	88.85		0.4326	154.5		0.4326	65.8
0.4334	88.91		0.4334	154.43		0.4334	65.82
0.4342	88.97		0.43419	154.35		0.43419	65.85
0.435	89		0.43499	154.27		0.43499	65.9
0.4358	89.01		0.43579	154.16		0.43579	65.99
0.4366	89.01		0.43658	154.09		0.43658	66.12
0.4374	89		0.43738	154.04		0.43738	66.3
0.4382	88.98		0.43818	154.01		0.43818	66.48
0.439	88.96		0.43897	154		0.43897	66.66
0.4398	88.95		0.43977	154		0.43977	66.85
0.4406	88.93		0.44057	153.99		0.44057	67.04
0.4414	88.93		0.44136	153.97		0.44136	67.23
0.4422	88.95		0.44216	153.95		0.44216	67.41
0.443	88.98		0.44296	153.92		0.44296	67.58
0.4438	89.01		0.44375	153.9		0.44375	67.72
0.4446	89.05		0.44455	153.9		0.44455	67.84
0.4453	89.07		0.44535	153.89		0.44535	67.95
0.4461	89.07		0.44614	153.86		0.44614	68.07
0.4469	89.06		0.44694	153.82		0.44694	68.19
0.4477	89.07		0.44774	153.77		0.44774	68.33
0.4485	89.08		0.44853	153.72		0.44853	68.48
0.4493	89.09		0.44933	153.7		0.44933	68.63
0.4501	89.08		0.45013	153.68		0.45013	68.77
0.4509	89.04		0.45092	153.66		0.45092	68.92
0.4517	88.98		0.45172	153.63		0.45172	69.05
0.4525	88.89		0.45252	153.59		0.45252	69.16
0.4533	88.77		0.45331	153.54		0.45331	69.27
0.4541	88.68		0.45411	153.49		0.45411	69.36
0.4549	88.62		0.45491	153.45		0.45491	69.47
0.4557	88.59		0.4557	153.44		0.4557	69.56
0.4565	88.6		0.4565	153.43		0.4565	69.64
0.4573	88.62		0.4573	153.44		0.4573	69.72
0.4581	88.65		0.45809	153.48		0.45809	69.78
0.4589	88.66		0.45889	153.51		0.45889	69.83
0.4597	88.66		0.45969	153.55		0.45969	69.86
0.4605	88.65		0.46048	153.56		0.46048	69.9
0.4613	88.65		0.46128	153.57		0.46128	69.92
0.4621	88.66		0.46208	153.59		0.46208	69.94
0.4629	88.7		0.46287	153.6		0.46287	69.95
0.4637	88.74		0.46367	153.6		0.46367	69.96
0.4645	88.77		0.46447	153.56		0.46447	69.97
0.4653	88.79		0.46526	153.51		0.46526	69.97
0.4661	88.77		0.46606	153.45		0.46606	69.96
0.4669	88.73		0.46686	153.38		0.46686	69.93
0.4677	88.7		0.46765	153.29		0.46765	69.87
0.4685	88.7		0.46845	153.19		0.46845	69.79
0.4692	88.72		0.46925	153.1		0.46925	69.72
0.47	88.73		0.47004	152.98		0.47004	69.65
0.4708	88.76		0.47084	152.85		0.47084	69.57
0.4716	88.8		0.47164	152.72		0.47164	69.51
0.4724	88.86		0.47243	152.57		0.47243	69.48
0.4732	88.95		0.47323	152.42		0.47323	69.49
0.474	89.05		0.47403	152.27		0.47403	69.52
0.4748	89.17		0.47482	152.15		0.47482	69.56
0.4756	89.28		0.47562	152.02		0.47562	69.65
0.4764	89.38		0.47642	151.9		0.47642	69.74
0.4772	89.45		0.47721	151.78		0.47721	69.83
0.478	89.48		0.47801	151.67		0.47801	69.91
0.4788	89.49		0.47881	151.57		0.47881	69.99
0.4796	89.47		0.4796	151.49		0.4796	70.05
0.4804	89.46		0.4804	151.42		0.4804	70.12
0.4812	89.47		0.4812	151.36		0.4812	70.18
0.482	89.49		0.48199	151.3		0.48199	70.21
0.4828	89.52		0.48279	151.23		0.48279	70.23
0.4836	89.53		0.48359	151.15		0.48359	70.24
0.4844	89.51		0.48438	151.07		0.48438	70.23
0.4852	89.47		0.48518	151		0.48518	70.19
0.486	89.43		0.48598	150.93		0.48598	70.14
0.4868	89.38		0.48678	150.87		0.48678	70.07
0.4876	89.32		0.48757	150.84		0.48757	70.01
0.4884	89.26		0.48837	150.81		0.48837	69.98
0.4892	89.2		0.48917	150.79		0.48917	69.95
0.49	89.16		0.48996	150.77		0.48996	69.91
0.4908	89.13		0.49076	150.75		0.49076	69.88
0.4916	89.13		0.49156	150.72		0.49156	69.87
0.4924	89.15		0.49235	150.71		0.49235	69.91
0.4931	89.18		0.49315	150.71		0.49315	69.96
0.4939	89.23		0.49395	150.72		0.49395	70.02
0.4947	89.26		0.49474	150.73		0.49474	70.09
0.4955	89.26		0.49554	150.75		0.49554	70.18
0.4963	89.24		0.49634	150.77		0.49634	70.28
0.4971	89.22		0.49713	150.78		0.49713	70.38
0.4979	89.21		0.49793	150.79		0.49793	70.48
0.4987	89.22		0.49873	150.79		0.49873	70.56
0.4995	89.26		0.49952	150.76		0.49952	70.62
0.5003	89.32		0.50032	150.74		0.50032	70.7
0.5011	89.38		0.50112	150.72		0.50112	70.8
0.5019	89.42		0.50191	150.68		0.50191	70.91
0.5027	89.44		0.50271	150.67		0.50271	71.03
0.5035	89.43		0.50351	150.66		0.50351	71.17
0.5043	89.41		0.5043	150.67		0.5043	71.35
0.5051	89.39		0.5051	150.68		0.5051	71.53
0.5059	89.35		0.5059	150.7		0.5059	71.73
0.5067	89.29		0.50669	150.71		0.50669	71.94
0.5075	89.23		0.50749	150.73		0.50749	72.17
0.5083	89.16		0.50829	150.73		0.50829	72.42
0.5091	89.11		0.50908	150.73		0.50908	72.68
0.5099	89.08		0.50988	150.71		0.50988	72.94
0.5107	89.05		0.51068	150.69		0.51068	73.23
0.5115	89.03		0.51147	150.68		0.51147	73.53
0.5123	89.01		0.51227	150.67		0.51227	73.83
0.5131	88.97		0.51307	150.69		0.51307	74.14
0.5139	88.92		0.51386	150.73		0.51386	74.43
0.5147	88.89		0.51466	150.79		0.51466	74.7
0.5155	88.87		0.51546	150.84		0.51546	74.94
0.5163	88.87		0.51625	150.85		0.51625	75.16
0.517	88.89		0.51705	150.86		0.51705	75.34
0.5178	88.88		0.51785	150.84		0.51785	75.53
0.5186	88.85		0.51864	150.79		0.51864	75.73
0.5194	88.8		0.51944	150.76		0.51944	75.94
0.5202	88.73		0.52024	150.74		0.52024	76.17
0.521	88.64		0.52103	150.73		0.52103	76.42
0.5218	88.54		0.52183	150.72		0.52183	76.69
0.5226	88.44		0.52263	150.71		0.52263	76.99
0.5234	88.36		0.52342	150.67		0.52342	77.33
0.5242	88.29		0.52422	150.63		0.52422	77.68
0.525	88.24		0.52502	150.59		0.52502	78.03
0.5258	88.2		0.52581	150.57		0.52581	78.37
0.5266	88.18		0.52661	150.56		0.52661	78.68
0.5274	88.16		0.52741	150.57		0.52741	78.95
0.5282	88.14		0.5282	150.58		0.5282	79.21
0.529	88.11		0.529	150.62		0.529	79.44
0.5298	88.09		0.5298	150.65		0.5298	79.7
0.5306	88.09		0.53059	150.66		0.53059	79.96
0.5314	88.12		0.53139	150.66		0.53139	80.25
0.5322	88.18		0.53219	150.66		0.53219	80.56
0.533	88.27		0.53298	150.65		0.53298	80.89
0.5338	88.36		0.53378	150.63		0.53378	81.23
0.5346	88.45		0.53458	150.6		0.53458	81.56
0.5354	88.5		0.53537	150.55		0.53537	81.91
0.5362	88.52		0.53617	150.51		0.53617	82.25
0.537	88.53		0.53697	150.47		0.53697	82.56
0.5378	88.54		0.53776	150.39		0.53776	82.85
0.5386	88.56		0.53856	150.34		0.53856	83.11
0.5394	88.6		0.53936	150.3		0.53936	83.35
0.5402	88.66		0.54015	150.26		0.54015	83.56
0.5409	88.73		0.54095	150.21		0.54095	83.75
0.5417	88.81		0.54175	150.15		0.54175	83.92
0.5425	88.88		0.54254	150.1		0.54254	84.09
0.5433	88.93		0.54334	150.07		0.54334	84.25
0.5441	88.98		0.54414	150.06		0.54414	84.42
0.5449	89.03		0.54493	150.05		0.54493	84.6
0.5457	89.11		0.54573	150.05		0.54573	84.77
0.5465	89.21		0.54653	150.06		0.54653	84.93
0.5473	89.3		0.54732	150.09		0.54732	85.09
0.5481	89.36		0.54812	150.13		0.54812	85.25
0.5489	89.41		0.54892	150.16		0.54892	85.39
0.5497	89.44		0.54971	150.18		0.54971	85.52
0.5505	89.44		0.55051	150.19		0.55051	85.62
0.5513	89.4		0.55131	150.19		0.55131	85.7
0.5521	89.34		0.5521	150.19		0.5521	85.74
0.5529	89.27		0.5529	150.19		0.5529	85.74
0.5537	89.19		0.5537	150.2		0.5537	85.72
0.5545	89.11		0.55449	150.2		0.55449	85.7
0.5553	89.05		0.55529	150.22		0.55529	85.65
0.5561	89.02		0.55609	150.23		0.55609	85.61
0.5569	89.03		0.55688	150.23		0.55688	85.59
0.5577	89.08		0.55768	150.22		0.55768	85.58
0.5585	89.14		0.55848	150.21		0.55848	85.6
0.5593	89.22		0.55927	150.21		0.55927	85.63
0.5601	89.27		0.56007	150.2		0.56007	85.69
0.5609	89.29		0.56087	150.2		0.56087	85.77
0.5617	89.3		0.56166	150.2		0.56166	85.89
0.5625	89.27		0.56246	150.2		0.56246	86.03
0.5633	89.22		0.56326	150.21		0.56326	86.19
0.5641	89.16		0.56405	150.19		0.56405	86.37
0.5649	89.07		0.56485	150.16		0.56485	86.56
0.5656	88.97		0.56565	150.14		0.56565	86.76
0.5664	88.86		0.56644	150.11		0.56644	86.97
0.5672	88.75		0.56724	150.07		0.56724	87.16
0.568	88.66		0.56804	150.04		0.56804	87.35
0.5688	88.6		0.56883	150.02		0.56883	87.56
0.5696	88.54		0.56963	150.01		0.56963	87.78
0.5704	88.48		0.57043	149.99		0.57043	88.01
0.5712	88.41		0.57122	149.99		0.57122	88.26
0.572	88.35		0.57202	149.99		0.57202	88.53
0.5728	88.31		0.57282	149.99		0.57282	88.83
0.5736	88.26		0.57361	149.97		0.57361	89.15
0.5744	88.22		0.57441	149.95		0.57441	89.5
0.5752	88.21		0.57521	149.92		0.57521	89.85
0.576	88.24		0.576	149.88		0.576	90.2
0.5768	88.27		0.5768	149.85		0.5768	90.54
0.5776	88.29		0.5776	149.84		0.5776	90.88
0.5784	88.3		0.57839	149.85		0.57839	91.22
0.5792	88.28		0.57919	149.89		0.57919	91.56
0.58	88.26		0.57999	149.91		0.57999	91.87
0.5808	88.25		0.58078	149.92		0.58078	92.13
0.5816	88.27		0.58158	149.95		0.58158	92.35
0.5824	88.32		0.58238	149.96		0.58238	92.52
0.5832	88.38		0.58317	149.97		0.58317	92.61
0.584	88.44		0.58397	149.99		0.58397	92.64
0.5848	88.51		0.58477	150.01		0.58477	92.62
0.5856	88.58		0.58556	150.05		0.58556	92.55
0.5864	88.64		0.58636	150.09		0.58636	92.45
0.5872	88.69		0.58716	150.13		0.58716	92.3
0.588	88.74		0.58795	150.17		0.58795	92.14
0.5888	88.75		0.58875	150.18		0.58875	91.96
0.5895	88.74		0.58955	150.2		0.58955	91.79
0.5903	88.73		0.59034	150.22		0.59034	91.59
0.5911	88.71		0.59114	150.22		0.59114	91.4
0.5919	88.72		0.59194	150.2		0.59194	91.22
0.5927	88.78		0.59273	150.16		0.59273	91.02
0.5935	88.87		0.59353	150.12		0.59353	90.8
0.5943	88.97		0.59433	150.06		0.59433	90.55
0.5951	89.06		0.59512	150.02		0.59512	90.29
0.5959	89.13		0.59592	149.99		0.59592	90.03
0.5967	89.19		0.59672	149.95		0.59672	89.79
0.5975	89.27		0.59751	149.92		0.59751	89.55
0.5983	89.38		0.59831	149.91		0.59831	89.29
0.5991	89.5		0.59911	149.89		0.59911	89.03
0.5999	89.64		0.5999	149.88		0.5999	88.76
0.6007	89.77		0.6007	149.86		0.6007	88.48
0.6015	89.89		0.6015	149.84		0.6015	88.2
0.6023	89.98		0.60229	149.81		0.60229	87.91
0.6031	90.03		0.60309	149.79		0.60309	87.62
0.6039	90.03		0.60389	149.75		0.60389	87.34
0.6047	89.99		0.60468	149.73		0.60468	87.07
0.6055	89.93		0.60548	149.68		0.60548	86.8
0.6063	89.85		0.60628	149.64		0.60628	86.54
0.6071	89.77		0.60707	149.6		0.60707	86.29
0.6079	89.69		0.60787	149.56		0.60787	86.05
0.6087	89.63		0.60867	149.49		0.60867	85.83
0.6095	89.58		0.60946	149.42		0.60946	85.59
0.6103	89.56		0.61026	149.37		0.61026	85.32
0.6111	89.55		0.61106	149.31		0.61106	85.03
0.6119	89.55		0.61185	149.27		0.61185	84.73
0.6127	89.55		0.61265	149.25		0.61265	84.39
0.6134	89.53		0.61345	149.24		0.61345	84.05
0.6142	89.49		0.61424	149.24		0.61424	83.72
0.615	89.46		0.61504	149.25		0.61504	83.39
0.6158	89.44		0.61584	149.25		0.61584	83.1
0.6166	89.43		0.61663	149.24		0.61663	82.84
0.6174	89.4		0.61743	149.24		0.61743	82.62
0.6182	89.36		0.61823	149.2		0.61823	82.42
0.619	89.3		0.61902	149.15		0.61902	82.26
0.6198	89.22		0.61982	149.1		0.61982	82.14
0.6206	89.11		0.62062	149.06		0.62062	82.07
0.6214	88.99		0.62141	149.03		0.62141	82.03
0.6222	88.88		0.62221	149.01		0.62221	81.98
0.623	88.81		0.62301	148.98		0.62301	81.95
0.6238	88.74		0.6238	148.95		0.6238	81.9
0.6246	88.66		0.6246	148.93		0.6246	81.82
0.6254	88.59		0.6254	148.91		0.6254	81.74
0.6262	88.53		0.6262	148.87		0.6262	81.66
0.627	88.48		0.62699	148.81		0.62699	81.56
0.6278	88.44		0.62779	148.74		0.62779	81.47
0.6286	88.37		0.62859	148.67		0.62859	81.39
0.6294	88.32		0.62938	148.6		0.62938	81.33
0.6302	88.26		0.63018	148.54		0.63018	81.33
0.631	88.23		0.63098	148.47		0.63098	81.35
0.6318	88.18		0.63177	148.41		0.63177	81.38
0.6326	88.13		0.63257	148.38		0.63257	81.42
0.6334	88.07		0.63337	148.35		0.63337	81.46
0.6342	88		0.63416	148.34		0.63416	81.48
0.635	87.95		0.63496	148.3		0.63496	81.49
0.6358	87.92		0.63576	148.26		0.63576	81.48
0.6366	87.92		0.63655	148.22		0.63655	81.45
0.6373	87.93		0.63735	148.18		0.63735	81.41
0.6381	87.97		0.63815	148.12		0.63815	81.35
0.6389	88		0.63894	148.04		0.63894	81.27
0.6397	88.03		0.63974	147.95		0.63974	81.17
0.6405	88.07		0.64054	147.87		0.64054	81.06
0.6413	88.13		0.64133	147.79		0.64133	80.95
0.6421	88.21		0.64213	147.69		0.64213	80.87
0.6429	88.3		0.64293	147.6		0.64293	80.83
0.6437	88.38		0.64372	147.53		0.64372	80.84
0.6445	88.45		0.64452	147.46		0.64452	80.89
0.6453	88.53		0.64532	147.37		0.64532	80.95
0.6461	88.59		0.64611	147.29		0.64611	81.02
0.6469	88.64		0.64691	147.22		0.64691	81.08
0.6477	88.67		0.64771	147.16		0.64771	81.1
0.6485	88.68		0.6485	147.12		0.6485	81.09
0.6493	88.69		0.6493	147.09		0.6493	81.03
0.6501	88.69		0.6501	147.07		0.6501	80.94
0.6509	88.69		0.65089	147.07		0.65089	80.81
0.6517	88.68		0.65169	147.06		0.65169	80.62
0.6525	88.66		0.65249	147.03		0.65249	80.38
0.6533	88.63		0.65328	146.99		0.65328	80.09
0.6541	88.59		0.65408	146.94		0.65408	79.76
0.6549	88.52		0.65488	146.88		0.65488	79.41
0.6557	88.43		0.65567	146.81		0.65567	79.04
0.6565	88.36		0.65647	146.74		0.65647	78.68
0.6573	88.31		0.65727	146.64		0.65727	78.32
0.6581	88.24		0.65806	146.53		0.65806	77.97
0.6589	88.18		0.65886	146.41		0.65886	77.63
0.6597	88.11		0.65966	146.3		0.65966	77.31
0.6605	88.05		0.66045	146.19		0.66045	77.01
0.6612	87.97		0.66125	146.07		0.66125	76.73
0.662	87.87		0.66205	145.95		0.66205	76.46
0.6628	87.76		0.66284	145.82		0.66284	76.25
0.6636	87.67		0.66364	145.67		0.66364	76.08
0.6644	87.58		0.66444	145.51		0.66444	75.96
0.6652	87.51		0.66523	145.33		0.66523	75.88
0.666	87.47		0.66603	145.16		0.66603	75.82
0.6668	87.44		0.66683	144.98		0.66683	75.8
0.6676	87.41		0.66762	144.81		0.66762	75.78
0.6684	87.41		0.66842	144.65		0.66842	75.78
0.6692	87.42		0.66922	144.49		0.66922	75.79
0.67	87.43		0.67001	144.34		0.67001	75.81
0.6708	87.43		0.67081	144.2		0.67081	75.8
0.6716	87.43		0.67161	144.07		0.67161	75.75
0.6724	87.41		0.6724	143.95		0.6724	75.68
0.6732	87.38		0.6732	143.81		0.6732	75.61
0.674	87.35		0.674	143.68		0.674	75.55
0.6748	87.33		0.67479	143.54		0.67479	75.5
0.6756	87.32		0.67559	143.4		0.67559	75.47
0.6764	87.29		0.67639	143.26		0.67639	75.42
0.6772	87.24		0.67718	143.11		0.67718	75.36
0.678	87.17		0.67798	142.95		0.67798	75.29
0.6788	87.1		0.67878	142.8		0.67878	75.2
0.6796	87.02		0.67957	142.64		0.67957	75.1
0.6804	86.97		0.68037	142.5		0.68037	74.98
0.6812	86.91		0.68117	142.36		0.68117	74.84
0.682	86.88		0.68196	142.23		0.68196	74.71
0.6828	86.86		0.68276	142.11		0.68276	74.59
0.6836	86.88		0.68356	141.99		0.68356	74.47
0.6844	86.94		0.68435	141.84		0.68435	74.36
0.6851	87.02		0.68515	141.72		0.68515	74.27
0.6859	87.08		0.68595	141.58		0.68595	74.21
0.6867	87.13		0.68674	141.44		0.68674	74.17
0.6875	87.18		0.68754	141.28		0.68754	74.11
0.6883	87.24		0.68834	141.11		0.68834	74.06
0.6891	87.31		0.68913	140.93		0.68913	74.03
0.6899	87.38		0.68993	140.73		0.68993	74.05
0.6907	87.43		0.69073	140.54		0.69073	74.09
0.6915	87.45		0.69152	140.35		0.69152	74.16
0.6923	87.44		0.69232	140.15		0.69232	74.26
0.6931	87.42		0.69312	139.96		0.69312	74.37
0.6939	87.4		0.69391	139.79		0.69391	74.48
0.6947	87.38		0.69471	139.6		0.69471	74.6
0.6955	87.36		0.69551	139.43		0.69551	74.72
0.6963	87.33		0.6963	139.25		0.6963	74.85
0.6971	87.32		0.6971	139.08		0.6971	74.99
0.6979	87.31		0.6979	138.92		0.6979	75.15
0.6987	87.31		0.69869	138.74		0.69869	75.32
0.6995	87.33		0.69949	138.57		0.69949	75.49
0.7003	87.43		0.70029	138.4		0.70029	75.64
0.7011	87.56		0.70108	138.25		0.70108	75.78
0.7019	87.69		0.70188	138.08		0.70188	75.93
0.7027	87.78		0.70268	137.92		0.70268	76.07
0.7035	87.89		0.70347	137.77		0.70347	76.21
0.7043	88.02		0.70427	137.62		0.70427	76.35
0.7051	88.14		0.70507	137.47		0.70507	76.49
0.7059	88.25		0.70586	137.33		0.70586	76.63
0.7067	88.37		0.70666	137.21		0.70666	76.8
0.7075	88.49		0.70746	137.09		0.70746	76.97
0.7083	88.64		0.70825	136.96		0.70825	77.11
0.7091	88.79		0.70905	136.86		0.70905	77.23
0.7098	88.92		0.70985	136.76		0.70985	77.31
0.7106	89		0.71064	136.68		0.71064	77.39
0.7114	89.07		0.71144	136.6		0.71144	77.48
0.7122	89.13		0.71224	136.49		0.71224	77.58
0.713	89.21		0.71303	136.39		0.71303	77.68
0.7138	89.3		0.71383	136.28		0.71383	77.77
0.7146	89.38		0.71463	136.19		0.71463	77.86
0.7154	89.44		0.71542	136.11		0.71542	77.94
0.7162	89.44		0.71622	136.03		0.71622	78.03
0.717	89.41		0.71702	135.95		0.71702	78.13
0.7178	89.34		0.71781	135.88		0.71781	78.26
0.7186	89.26		0.71861	135.8		0.71861	78.41
0.7194	89.2		0.71941	135.7		0.71941	78.55
0.7202	89.15		0.7202	135.61		0.7202	78.67
0.721	89.09		0.721	135.5		0.721	78.75
0.7218	89.04		0.7218	135.42		0.7218	78.74
0.7226	89.02		0.72259	135.33		0.72259	78.63
0.7234	89.03		0.72339	135.24		0.72339	78.45
0.7242	89.07		0.72419	135.17		0.72419	78.21
0.725	89.1		0.72498	135.12		0.72498	77.95
0.7258	89.13		0.72578	135.06		0.72578	77.69
0.7266	89.18		0.72658	135		0.72658	77.45
0.7274	89.24		0.72737	134.93		0.72737	77.23
0.7282	89.32		0.72817	134.85		0.72817	77.03
0.729	89.42		0.72897	134.76		0.72897	76.85
0.7298	89.55		0.72976	134.67		0.72976	76.68
0.7306	89.69		0.73056	134.56		0.73056	76.5
0.7314	89.84		0.73136	134.43		0.73136	76.31
0.7322	90.02		0.73215	134.33		0.73215	76.14
0.733	90.23		0.73295	134.22		0.73295	75.99
0.7337	90.47		0.73375	134.12		0.73375	75.87
0.7345	90.74		0.73454	134.04		0.73454	75.76
0.7353	91.03		0.73534	133.96		0.73534	75.67
0.7361	91.3		0.73614	133.88		0.73614	75.57
0.7369	91.56		0.73693	133.81		0.73693	75.47
0.7377	91.84		0.73773	133.72		0.73773	75.35
0.7385	92.11		0.73853	133.61		0.73853	75.24
0.7393	92.38		0.73932	133.49		0.73932	75.12
0.7401	92.61		0.74012	133.37		0.74012	75.02
0.7409	92.84		0.74092	133.25		0.74092	74.93
0.7417	93.06		0.74171	133.14		0.74171	74.87
0.7425	93.29		0.74251	133.02		0.74251	74.82
0.7433	93.5		0.74331	132.93		0.74331	74.77
0.7441	93.68		0.7441	132.85		0.7441	74.72
0.7449	93.82		0.7449	132.78		0.7449	74.67
0.7457	93.91		0.7457	132.69		0.7457	74.61
0.7465	93.99		0.74649	132.62		0.74649	74.52
0.7473	94.07		0.74729	132.53		0.74729	74.41
0.7481	94.15		0.74809	132.46		0.74809	74.29
0.7489	94.22		0.74888	132.4		0.74888	74.16
0.7497	94.28		0.74968	132.34		0.74968	74.04
0.7505	94.33		0.75048	132.27		0.75048	73.93
0.7513	94.34		0.75127	132.2		0.75127	73.85
0.7521	94.34		0.75207	132.12		0.75207	73.81
0.7529	94.33		0.75287	132.05		0.75287	73.8
0.7537	94.33		0.75366	131.98		0.75366	73.8
0.7545	94.32		0.75446	131.91		0.75446	73.78
0.7553	94.32		0.75526	131.85		0.75526	73.73
0.7561	94.35		0.75605	131.79		0.75605	73.67
0.7569	94.41		0.75685	131.75		0.75685	73.61
0.7576	94.47		0.75765	131.72		0.75765	73.57
0.7584	94.51		0.75844	131.7		0.75844	73.57
0.7592	94.52		0.75924	131.68		0.75924	73.59
0.76	94.49		0.76004	131.65		0.76004	73.63
0.7608	94.45		0.76083	131.64		0.76083	73.67
0.7616	94.4		0.76163	131.64		0.76163	73.69
0.7624	94.36		0.76243	131.64		0.76243	73.68
0.7632	94.33		0.76322	131.63		0.76322	73.67
0.764	94.29		0.76402	131.64		0.76402	73.65
0.7648	94.24		0.76482	131.63		0.76482	73.62
0.7656	94.22		0.76562	131.62		0.76562	73.59
0.7664	94.22		0.76641	131.61		0.76641	73.57
0.7672	94.23		0.76721	131.62		0.76721	73.58
0.768	94.24		0.76801	131.64		0.76801	73.6
0.7688	94.24		0.7688	131.68		0.7688	73.61
0.7696	94.22		0.7696	131.71		0.7696	73.6
0.7704	94.19		0.7704	131.74		0.7704	73.58
0.7712	94.19		0.77119	131.75		0.77119	73.56
0.772	94.2		0.77199	131.75		0.77199	73.53
0.7728	94.21		0.77279	131.74		0.77279	73.49
0.7736	94.22		0.77358	131.72		0.77358	73.42
0.7744	94.24		0.77438	131.72		0.77438	73.31
0.7752	94.26		0.77518	131.73		0.77518	73.14
0.776	94.29		0.77597	131.75		0.77597	72.94
0.7768	94.32		0.77677	131.75		0.77677	72.71
0.7776	94.34		0.77757	131.76		0.77757	72.45
0.7784	94.33		0.77836	131.76		0.77836	72.17
0.7792	94.29		0.77916	131.77		0.77916	71.89
0.78	94.16		0.77996	131.77		0.77996	71.6
0.7808	93.99		0.78075	131.75		0.78075	71.31
0.7815	93.81		0.78155	131.74		0.78155	71.03
0.7823	93.64		0.78235	131.73		0.78235	70.74
0.7831	93.44		0.78314	131.7		0.78314	70.46
0.7839	93.25		0.78394	131.67		0.78394	70.2
0.7847	93.1		0.78474	131.63		0.78474	69.94
0.7855	92.96		0.78553	131.59		0.78553	69.67
0.7863	92.79		0.78633	131.54		0.78633	69.38
0.7871	92.65		0.78713	131.49		0.78713	69.08
0.7879	92.5		0.78792	131.45		0.78792	68.81
0.7887	92.33		0.78872	131.4		0.78872	68.56
0.7895	92.16		0.78952	131.34		0.78952	68.31
0.7903	92.01		0.79031	131.26		0.79031	68.05
0.7911	91.88		0.79111	131.19		0.79111	67.78
0.7919	91.77		0.79191	131.14		0.79191	67.5
0.7927	91.67		0.7927	131.08		0.7927	67.21
0.7935	91.56		0.7935	131.02		0.7935	66.94
0.7943	91.44		0.7943	130.97		0.7943	66.66
0.7951	91.31		0.79509	130.93		0.79509	66.38
0.7959	91.18		0.79589	130.92		0.79589	66.09
0.7967	91.05		0.79669	130.91		0.79669	65.8
0.7975	90.94		0.79748	130.9		0.79748	65.48
0.7983	90.86		0.79828	130.9		0.79828	65.16
0.7991	90.78		0.79908	130.92		0.79908	64.84
0.7999	90.7		0.79987	130.92		0.79987	64.52
0.8007	90.63		0.80067	130.92		0.80067	64.23
0.8015	90.58		0.80147	130.91		0.80147	63.99
0.8023	90.55		0.80226	130.89		0.80226	63.81
0.8031	90.51		0.80306	130.88		0.80306	63.64
0.8039	90.5		0.80386	130.87		0.80386	63.52
0.8047	90.48		0.80465	130.87		0.80465	63.41
0.8054	90.47		0.80545	130.87		0.80545	63.3
0.8062	90.43		0.80625	130.87		0.80625	63.2
0.807	90.38		0.80704	130.85		0.80704	63.12
0.8078	90.29		0.80784	130.84		0.80784	63.03
0.8086	90.18		0.80864	130.85		0.80864	62.97
0.8094	90.06		0.80943	130.87		0.80943	62.9
0.8102	89.95		0.81023	130.9		0.81023	62.84
0.811	89.85		0.81103	130.97		0.81103	62.78
0.8118	89.73		0.81182	131.01		0.81182	62.69
0.8126	89.61		0.81262	131.08		0.81262	62.6
0.8134	89.46		0.81342	131.14		0.81342	62.5
0.8142	89.29		0.81421	131.2		0.81421	62.4
0.815	89.08		0.81501	131.27		0.81501	62.3
0.8158	88.86		0.81581	131.34		0.81581	62.21
0.8166	88.65		0.8166	131.4		0.8166	62.13
0.8174	88.45		0.8174	131.47		0.8174	62.08
0.8182	88.28		0.8182	131.55		0.8182	62.04
0.819	88.12		0.81899	131.63		0.81899	62
0.8198	87.98		0.81979	131.71		0.81979	61.97
0.8206	87.83		0.82059	131.78		0.82059	61.95
0.8214	87.69		0.82138	131.85		0.82138	61.92
0.8222	87.54		0.82218	131.94		0.82218	61.89
0.823	87.41		0.82298	132		0.82298	61.87
0.8238	87.31		0.82377	132.05		0.82377	61.87
0.8246	87.23		0.82457	132.1		0.82457	61.87
0.8254	87.14		0.82537	132.16		0.82537	61.88
0.8262	87.03		0.82616	132.19		0.82616	61.89
0.827	86.9		0.82696	132.24		0.82696	61.9
0.8278	86.75		0.82776	132.27		0.82776	61.91
0.8286	86.62		0.82855	132.29		0.82855	61.9
0.8293	86.5		0.82935	132.3		0.82935	61.87
0.8301	86.41		0.83015	132.32		0.83015	61.82
0.8309	86.33		0.83094	132.34		0.83094	61.75
0.8317	86.26		0.83174	132.37		0.83174	61.66
0.8325	86.18		0.83254	132.39		0.83254	61.56
0.8333	86.07		0.83333	132.42		0.83333	61.46
0.8341	85.93		0.83413	132.44		0.83413	61.38
0.8349	85.77		0.83493	132.48		0.83493	61.31
0.8357	85.58		0.83572	132.53		0.83572	61.26
0.8365	85.39		0.83652	132.57		0.83652	61.22
0.8373	85.23		0.83732	132.61		0.83732	61.18
0.8381	85.12		0.83811	132.64		0.83811	61.12
0.8389	85.06		0.83891	132.68		0.83891	61.05
0.8397	85.04		0.83971	132.73		0.83971	60.96
0.8405	85.05		0.8405	132.76		0.8405	60.87
0.8413	85.07		0.8413	132.79		0.8413	60.78
0.8421	85.09		0.8421	132.81		0.8421	60.69
0.8429	85.08		0.84289	132.83		0.84289	60.59
0.8437	85.05		0.84369	132.84		0.84369	60.49
0.8445	85.04		0.84449	132.87		0.84449	60.4
0.8453	85.04		0.84528	132.92		0.84528	60.29
0.8461	85.02		0.84608	132.95		0.84608	60.16
0.8469	85		0.84688	132.97		0.84688	60
0.8477	84.95		0.84767	132.98		0.84767	59.82
0.8485	84.88		0.84847	132.98		0.84847	59.63
0.8493	84.82		0.84927	133.01		0.84927	59.45
0.8501	84.79		0.85006	133.06		0.85006	59.27
0.8509	84.78		0.85086	133.13		0.85086	59.07
0.8517	84.81		0.85166	133.22		0.85166	58.86
0.8525	84.87		0.85245	133.32		0.85245	58.66
0.8533	84.94		0.85325	133.41		0.85325	58.48
0.854	84.98		0.85405	133.51		0.85405	58.33
0.8548	85		0.85484	133.59		0.85484	58.23
0.8556	85.01		0.85564	133.69		0.85564	58.15
0.8564	85.02		0.85644	133.8		0.85644	58.08
0.8572	85.04		0.85723	133.91		0.85723	58.02
0.858	85.11		0.85803	134.05		0.85803	57.97
0.8588	85.19		0.85883	134.19		0.85883	57.93
0.8596	85.3		0.85962	134.34		0.85962	57.9
0.8604	85.41		0.86042	134.47		0.86042	57.87
0.8612	85.51		0.86122	134.6		0.86122	57.83
0.862	85.62		0.86201	134.72		0.86201	57.81
0.8628	85.74		0.86281	134.85		0.86281	57.8
0.8636	85.86		0.86361	134.99		0.86361	57.8
0.8644	85.94		0.8644	135.13		0.8644	57.8
0.8652	86.02		0.8652	135.25		0.8652	57.81
0.866	86.12		0.866	135.36		0.866	57.83
0.8668	86.22		0.86679	135.47		0.86679	57.85
0.8676	86.33		0.86759	135.58		0.86759	57.87
0.8684	86.43		0.86839	135.7		0.86839	57.89
0.8692	86.55		0.86918	135.83		0.86918	57.93
0.87	86.68		0.86998	135.96		0.86998	57.97
0.8708	86.82		0.87078	136.07		0.87078	58.01
0.8716	86.97		0.87157	136.18		0.87157	58.06
0.8724	87.14		0.87237	136.28		0.87237	58.12
0.8732	87.35		0.87317	136.39		0.87317	58.16
0.874	87.57		0.87396	136.49		0.87396	58.21
0.8748	87.78		0.87476	136.58		0.87476	58.27
0.8756	87.98		0.87556	136.65		0.87556	58.34
0.8764	88.17		0.87635	136.72		0.87635	58.4
0.8772	88.34		0.87715	136.79		0.87715	58.46
0.8779	88.47		0.87795	136.88		0.87795	58.52
0.8787	88.58		0.87874	136.96		0.87874	58.58
0.8795	88.67		0.87954	137.05		0.87954	58.65
0.8803	88.74		0.88034	137.14		0.88034	58.71
0.8811	88.77		0.88113	137.23		0.88113	58.78
0.8819	88.76		0.88193	137.33		0.88193	58.85
0.8827	88.74		0.88273	137.42		0.88273	58.94
0.8835	88.69		0.88352	137.5		0.88352	59.01
0.8843	88.64		0.88432	137.55		0.88432	59.09
0.8851	88.59		0.88512	137.59		0.88512	59.18
0.8859	88.55		0.88591	137.62		0.88591	59.26
0.8867	88.52		0.88671	137.66		0.88671	59.32
0.8875	88.53		0.88751	137.69		0.88751	59.38
0.8883	88.54		0.8883	137.7		0.8883	59.4
0.8891	88.56		0.8891	137.71		0.8891	59.44
0.8899	88.55		0.8899	137.72		0.8899	59.47
0.8907	88.51		0.89069	137.7		0.89069	59.52
0.8915	88.44		0.89149	137.69		0.89149	59.59
0.8923	88.36		0.89229	137.7		0.89229	59.66
0.8931	88.3		0.89308	137.71		0.89308	59.73
0.8939	88.26		0.89388	137.7		0.89388	59.81
0.8947	88.25		0.89468	137.7		0.89468	59.89
0.8955	88.28		0.89547	137.69		0.89547	59.97
0.8963	88.3		0.89627	137.69		0.89627	60.04
0.8971	88.3		0.89707	137.68		0.89707	60.1
0.8979	88.3		0.89786	137.66		0.89786	60.15
0.8987	88.3		0.89866	137.64		0.89866	60.2
0.8995	88.3		0.89946	137.63		0.89946	60.22
0.9003	88.3		0.90025	137.64		0.90025	60.22
0.9011	88.3		0.90105	137.65		0.90105	60.23
0.9018	88.29		0.90185	137.67		0.90185	60.23
0.9026	88.23		0.90264	137.7		0.90264	60.23
0.9034	88.16		0.90344	137.75		0.90344	60.23
0.9042	88.09		0.90424	137.79		0.90424	60.23
0.905	88.08		0.90504	137.84		0.90504	60.22
0.9058	88.11		0.90583	137.91		0.90583	60.22
0.9066	88.19		0.90663	137.97		0.90663	60.24
0.9074	88.28		0.90743	138.04		0.90743	60.26
0.9082	88.37		0.90822	138.11		0.90822	60.3
0.909	88.46		0.90902	138.17		0.90902	60.36
0.9098	88.52		0.90982	138.22		0.90982	60.43
0.9106	88.59		0.91061	138.26		0.91061	60.54
0.9114	88.63		0.91141	138.3		0.91141	60.66
0.9122	88.65		0.91221	138.34		0.91221	60.79
0.913	88.66		0.913	138.38		0.913	60.93
0.9138	88.69		0.9138	138.43		0.9138	61.07
0.9146	88.73		0.9146	138.45		0.9146	61.19
0.9154	88.8		0.91539	138.47		0.91539	61.3
0.9162	88.9		0.91619	138.49		0.91619	61.41
0.917	88.99		0.91699	138.51		0.91699	61.53
0.9178	89.07		0.91778	138.54		0.91778	61.65
0.9186	89.15		0.91858	138.56		0.91858	61.78
0.9194	89.21		0.91938	138.58		0.91938	61.92
0.9202	89.25		0.92017	138.6		0.92017	62.06
0.921	89.27		0.92097	138.62		0.92097	62.21
0.9218	89.27		0.92177	138.63		0.92177	62.38
0.9226	89.29		0.92256	138.65		0.92256	62.55
0.9234	89.32		0.92336	138.66		0.92336	62.72
0.9242	89.33		0.92416	138.65		0.92416	62.88
0.925	89.3		0.92495	138.63		0.92495	63.04
0.9257	89.27		0.92575	138.63		0.92575	63.2
0.9265	89.21		0.92655	138.63		0.92655	63.36
0.9273	89.17		0.92734	138.63		0.92734	63.51
0.9281	89.14		0.92814	138.62		0.92814	63.64
0.9289	89.1		0.92894	138.6		0.92894	63.74
0.9297	89.03		0.92973	138.57		0.92973	63.83
0.9305	88.93		0.93053	138.55		0.93053	63.91
0.9313	88.82		0.93133	138.51		0.93133	63.98
0.9321	88.73		0.93212	138.46		0.93212	64.04
0.9329	88.66		0.93292	138.41		0.93292	64.1
0.9337	88.63		0.93372	138.34		0.93372	64.16
0.9345	88.64		0.93451	138.25		0.93451	64.22
0.9353	88.66		0.93531	138.17		0.93531	64.29
0.9361	88.67		0.93611	138.11		0.93611	64.35
0.9369	88.68		0.9369	138.05		0.9369	64.42
0.9377	88.67		0.9377	137.98		0.9377	64.5
0.9385	88.66		0.9385	137.9		0.9385	64.57
0.9393	88.64		0.93929	137.82		0.93929	64.63
0.9401	88.62		0.94009	137.75		0.94009	64.69
0.9409	88.62		0.94089	137.67		0.94089	64.76
0.9417	88.61		0.94168	137.6		0.94168	64.81
0.9425	88.6		0.94248	137.53		0.94248	64.86
0.9433	88.58		0.94328	137.43		0.94328	64.9
0.9441	88.57		0.94407	137.34		0.94407	64.95
0.9449	88.57		0.94487	137.26		0.94487	64.99
0.9457	88.56		0.94567	137.16		0.94567	65.02
0.9465	88.52		0.94646	137.04		0.94646	65.05
0.9473	88.47		0.94726	136.92		0.94726	65.07
0.9481	88.44		0.94806	136.78		0.94806	65.09
0.9489	88.42		0.94885	136.67		0.94885	65.11
0.9496	88.41		0.94965	136.61		0.94965	65.13
0.9504	88.4		0.95045	136.58		0.95045	65.15
0.9512	88.36		0.95124	136.55		0.95124	65.16
0.952	88.28		0.95204	136.54		0.95204	65.17
0.9528	88.17		0.95284	136.53		0.95284	65.19
0.9536	88.06		0.95363	136.52		0.95363	65.21
0.9544	87.97		0.95443	136.52		0.95443	65.24
0.9552	87.91		0.95523	136.5		0.95523	65.26
0.956	87.86		0.95602	136.49		0.95602	65.28
0.9568	87.82		0.95682	136.48		0.95682	65.29
0.9576	87.81		0.95762	136.45		0.95762	65.29
0.9584	87.81		0.95841	136.42		0.95841	65.28
0.9592	87.84		0.95921	136.37		0.95921	65.27
0.96	87.88		0.96001	136.34		0.96001	65.25
0.9608	87.93		0.9608	136.33		0.9608	65.22
0.9616	87.99		0.9616	136.31		0.9616	65.18
0.9624	88.07		0.9624	136.3		0.9624	65.14
0.9632	88.16		0.96319	136.29		0.96319	65.12
0.964	88.26		0.96399	136.29		0.96399	65.1
0.9648	88.36		0.96479	136.31		0.96479	65.07
0.9656	88.46		0.96558	136.33		0.96558	65.03
0.9664	88.54		0.96638	136.35		0.96638	64.99
0.9672	88.58		0.96718	136.36		0.96718	64.96
0.968	88.61		0.96797	136.38		0.96797	64.95
0.9688	88.62		0.96877	136.39		0.96877	64.93
0.9696	88.64		0.96957	136.4		0.96957	64.92
0.9704	88.69		0.97036	136.43		0.97036	64.91
0.9712	88.76		0.97116	136.46		0.97116	64.9
0.972	88.81		0.97196	136.45		0.97196	64.9
0.9728	88.84		0.97275	136.44		0.97275	64.9
0.9736	88.86		0.97355	136.45		0.97355	64.89
0.9743	88.87		0.97435	136.45		0.97435	64.88
0.9751	88.87		0.97514	136.47		0.97514	64.87
0.9759	88.87		0.97594	136.49		0.97594	64.86
0.9767	88.9		0.97674	136.51		0.97674	64.85
0.9775	88.9		0.97753	136.54		0.97753	64.83
0.9783	88.89		0.97833	136.58		0.97833	64.81
0.9791	88.89		0.97913	136.61		0.97913	64.8
0.9799	88.9		0.97992	136.64		0.97992	64.79
0.9807	88.92		0.98072	136.67		0.98072	64.77
0.9815	88.98		0.98152	136.67		0.98152	64.76
0.9823	89.07		0.98231	136.68		0.98231	64.74
0.9831	89.17		0.98311	136.68		0.98311	64.7
0.9839	89.27		0.98391	136.68		0.98391	64.66
0.9847	89.34		0.9847	136.68		0.9847	64.64
0.9855	89.39		0.9855	136.68		0.9855	64.62
0.9863	89.4		0.9863	136.69		0.9863	64.59
0.9871	89.42		0.98709	136.7		0.98709	64.56
0.9879	89.44		0.98789	136.71		0.98789	64.53
0.9887	89.45		0.98869	136.73		0.98869	64.49
0.9895	89.48		0.98948	136.76		0.98948	64.46
0.9903	89.53		0.99028	136.8		0.99028	64.41
0.9911	89.61		0.99108	136.86		0.99108	64.35
0.9919	89.71		0.99187	136.91		0.99187	64.29
0.9927	89.81		0.99267	136.97		0.99267	64.22
0.9935	89.91		0.99347	137.05		0.99347	64.15
0.9943	90.01		0.99426	137.14		0.99426	64.1
0.9951	90.11		0.99506	137.23		0.99506	64.06
0.9959	90.17		0.99586	137.33		0.99586	64.01
0.9967	90.21		0.99665	137.43		0.99665	63.95
0.9975	90.21		0.99745	137.53		0.99745	63.88
0.9982	90.2		0.99825	137.62		0.99825	63.81
0.999	90.21		0.99904	137.72		0.99904	63.73
0.9998	90.25		0.99984	137.83		0.99984	63.64
1.0006	90.33		1.00064	137.94		1.00064	63.55
1.0014	90.44		1.00143	138.06		1.00143	63.45
1.0022	90.54		1.00223	138.18		1.00223	63.35
1.003	90.66		1.00303	138.3		1.00303	63.26
1.0038	90.78		1.00382	138.43		1.00382	63.16
1.0046	90.91		1.00462	138.56		1.00462	63.06
1.0054	91.03		1.00542	138.68		1.00542	62.97
1.0062	91.18		1.00621	138.82		1.00621	62.88
1.007	91.33		1.00701	138.95		1.00701	62.8
1.0078	91.49		1.00781	139.1		1.00781	62.74
1.0086	91.64		1.0086	139.24		1.0086	62.7
1.0094	91.77		1.0094	139.39		1.0094	62.68
1.0102	91.89		1.0102	139.54		1.0102	62.66
1.011	91.99		1.01099	139.7		1.01099	62.65
1.0118	92.06		1.01179	139.87		1.01179	62.64
1.0126	92.1		1.01259	140.04		1.01259	62.62
1.0134	92.13		1.01338	140.23		1.01338	62.61
1.0142	92.15		1.01418	140.43		1.01418	62.59
1.015	92.19		1.01498	140.62		1.01498	62.57
1.0158	92.24		1.01577	140.81		1.01577	62.56
1.0166	92.29		1.01657	141		1.01657	62.54
1.0174	92.32		1.01737	141.18		1.01737	62.51
1.0182	92.32		1.01816	141.35		1.01816	62.48
1.019	92.31		1.01896	141.52		1.01896	62.46
1.0198	92.32		1.01976	141.69		1.01976	62.43
1.0206	92.35		1.02055	141.88		1.02055	62.39
1.0214	92.41		1.02135	142.07		1.02135	62.35
1.0221	92.48		1.02215	142.27		1.02215	62.3
1.0229	92.54		1.02294	142.49		1.02294	62.26
1.0237	92.58		1.02374	142.7		1.02374	62.21
1.0245	92.6		1.02454	142.93		1.02454	62.18
1.0253	92.62		1.02533	143.17		1.02533	62.15
1.0261	92.65		1.02613	143.44		1.02613	62.12
1.0269	92.68		1.02693	143.71		1.02693	62.1
1.0277	92.69		1.02772	143.99		1.02772	62.08
1.0285	92.67		1.02852	144.24		1.02852	62.06
1.0293	92.65		1.02932	144.44		1.02932	62.04
1.0301	92.6		1.03011	144.62		1.03011	62.02
1.0309	92.55		1.03091	144.79		1.03091	62
1.0317	92.5		1.03171	144.95		1.03171	61.99
1.0325	92.46		1.0325	145.09		1.0325	61.98
1.0333	92.43		1.0333	145.25		1.0333	61.97
1.0341	92.42		1.0341	145.41		1.0341	61.95
1.0349	92.42		1.03489	145.59		1.03489	61.94
1.0357	92.44		1.03569	145.75		1.03569	61.92
1.0365	92.44		1.03649	145.89		1.03649	61.9
1.0373	92.43		1.03728	146.04		1.03728	61.88
1.0381	92.4		1.03808	146.18		1.03808	61.86
1.0389	92.35		1.03888	146.34		1.03888	61.85
1.0397	92.31		1.03967	146.49		1.03967	61.86
1.0405	92.3		1.04047	146.63		1.04047	61.87
1.0413	92.28		1.04127	146.78		1.04127	61.89
1.0421	92.25		1.04207	146.9		1.04207	61.9
1.0429	92.22		1.04286	147.02		1.04286	61.91
1.0437	92.19		1.04366	147.15		1.04366	61.91
1.0445	92.17		1.04446	147.25		1.04446	61.91
1.0453	92.15		1.04525	147.36		1.04525	61.92
1.046	92.14		1.04605	147.47		1.04605	61.94
1.0468	92.14		1.04685	147.59		1.04685	61.96
1.0476	92.13		1.04764	147.71		1.04764	61.97
1.0484	92.11		1.04844	147.84		1.04844	61.98
1.0492	92.09		1.04924	147.98		1.04924	61.99
1.05	92.06		1.05003	148.1		1.05003	62
1.0508	92.02		1.05083	148.21		1.05083	62.01
1.0516	91.99		1.05163	148.35		1.05163	62.01
1.0524	91.96		1.05242	148.48		1.05242	62.01
1.0532	91.92		1.05322	148.61		1.05322	62.01
1.054	91.89		1.05402	148.74		1.05402	62
1.0548	91.87		1.05481	148.86		1.05481	61.99
1.0556	91.86		1.05561	148.99		1.05561	61.97
1.0564	91.83		1.05641	149.13		1.05641	61.95
1.0572	91.81		1.0572	149.25		1.0572	61.94
1.058	91.79		1.058	149.37		1.058	61.93
1.0588	91.77		1.0588	149.49		1.0588	61.92
1.0596	91.76		1.05959	149.59		1.05959	61.92
1.0604	91.75		1.06039	149.68		1.06039	61.92
1.0612	91.72		1.06119	149.78		1.06119	61.92
1.062	91.7		1.06198	149.88		1.06198	61.92
1.0628	91.69		1.06278	149.98		1.06278	61.92
1.0636	91.71		1.06358	150.08		1.06358	61.91
1.0644	91.77		1.06437	150.17		1.06437	61.88
1.0652	91.87		1.06517	150.27		1.06517	61.86
1.066	91.99		1.06597	150.35		1.06597	61.84
1.0668	92.11		1.06676	150.42		1.06676	61.82
1.0676	92.25		1.06756	150.49		1.06756	61.81
1.0684	92.4		1.06836	150.56		1.06836	61.8
1.0692	92.54		1.06915	150.65		1.06915	61.79
1.0699	92.65		1.06995	150.73		1.06995	61.78
1.0707	92.73		1.07075	150.79		1.07075	61.78
1.0715	92.79		1.07154	150.87		1.07154	61.78
1.0723	92.87		1.07234	150.94		1.07234	61.77
1.0731	92.97		1.07314	151		1.07314	61.76
1.0739	93.07		1.07393	151.06		1.07393	61.76
1.0747	93.16		1.07473	151.11		1.07473	61.75
1.0755	93.25		1.07553	151.16		1.07553	61.75
1.0763	93.35		1.07632	151.22		1.07632	61.74
1.0771	93.48		1.07712	151.25		1.07712	61.74
1.0779	93.61		1.07792	151.3		1.07792	61.74
1.0787	93.72		1.07871	151.34		1.07871	61.74
1.0795	93.82		1.07951	151.37		1.07951	61.76
1.0803	93.89		1.08031	151.4		1.08031	61.77
1.0811	93.94		1.0811	151.43		1.0811	61.78
1.0819	94		1.0819	151.48		1.0819	61.8
1.0827	94.05		1.0827	151.54		1.0827	61.8
1.0835	94.09		1.08349	151.6		1.08349	61.81
1.0843	94.11		1.08429	151.65		1.08429	61.82
1.0851	94.13		1.08509	151.7		1.08509	61.82
1.0859	94.16		1.08588	151.75		1.08588	61.83
1.0867	94.18		1.08668	151.83		1.08668	61.84
1.0875	94.18		1.08748	151.91		1.08748	61.86
1.0883	94.17		1.08827	152		1.08827	61.87
1.0891	94.17		1.08907	152.08		1.08907	61.87
1.0899	94.16		1.08987	152.13		1.08987	61.88
1.0907	94.16		1.09066	152.17		1.09066	61.89
1.0915	94.18		1.09146	152.19		1.09146	61.9
1.0923	94.23		1.09226	152.21		1.09226	61.91
1.0931	94.29		1.09305	152.23		1.09305	61.9
1.0938	94.33		1.09385	152.26		1.09385	61.89
1.0946	94.33		1.09465	152.29		1.09465	61.87
1.0954	94.31		1.09544	152.3		1.09544	61.86
1.0962	94.28		1.09624	152.31		1.09624	61.86
1.097	94.28		1.09704	152.33		1.09704	61.86
1.0978	94.32		1.09783	152.37		1.09783	61.86
1.0986	94.39		1.09863	152.41		1.09863	61.86
1.0994	94.47		1.09943	152.47		1.09943	61.88
1.1002	94.51		1.10022	152.51		1.10022	61.9
1.101	94.52		1.10102	152.55		1.10102	61.93
1.1018	94.5		1.10182	152.58		1.10182	61.95
1.1026	94.48		1.10261	152.6		1.10261	61.96
1.1034	94.45		1.10341	152.62		1.10341	61.97
1.1042	94.41		1.10421	152.63		1.10421	61.98
1.105	94.37		1.105	152.65		1.105	62.01
1.1058	94.32		1.1058	152.66		1.1058	62.05
1.1066	94.27		1.1066	152.68		1.1066	62.08
1.1074	94.25		1.10739	152.69		1.10739	62.11
1.1082	94.25		1.10819	152.7		1.10819	62.13
1.109	94.26		1.10899	152.73		1.10899	62.14
1.1098	94.29		1.10978	152.76		1.10978	62.15
1.1106	94.33		1.11058	152.8		1.11058	62.16
1.1114	94.37		1.11138	152.83		1.11138	62.16
1.1122	94.4		1.11217	152.88		1.11217	62.16
1.113	94.41		1.11297	152.9		1.11297	62.16
1.1138	94.4		1.11377	152.9		1.11377	62.16
1.1146	94.41		1.11456	152.89		1.11456	62.15
1.1154	94.45		1.11536	152.88		1.11536	62.15
1.1162	94.52		1.11616	152.88		1.11616	62.16
1.117	94.61		1.11695	152.87		1.11695	62.17
1.1178	94.71		1.11775	152.89		1.11775	62.19
1.1185	94.8		1.11855	152.9		1.11855	62.19
1.1193	94.87		1.11934	152.91		1.11934	62.19
1.1201	94.92		1.12014	152.93		1.12014	62.2
1.1209	94.97		1.12094	152.95		1.12094	62.2
1.1217	95.02		1.12173	152.99		1.12173	62.21
1.1225	95.07		1.12253	153.03		1.12253	62.21
1.1233	95.12		1.12333	153.07		1.12333	62.22
1.1241	95.16		1.12412	153.13		1.12412	62.23
1.1249	95.2		1.12492	153.18		1.12492	62.25
1.1257	95.25		1.12572	153.23		1.12572	62.27
1.1265	95.3		1.12651	153.27		1.12651	62.27
1.1273	95.36		1.12731	153.31		1.12731	62.29
1.1281	95.43		1.12811	153.34		1.12811	62.3
1.1289	95.49		1.1289	153.36		1.1289	62.31
1.1297	95.55		1.1297	153.39		1.1297	62.32
1.1305	95.61		1.1305	153.43		1.1305	62.34
1.1313	95.68		1.13129	153.46		1.13129	62.36
1.1321	95.76		1.13209	153.52		1.13209	62.39
1.1329	95.85		1.13289	153.57		1.13289	62.42
1.1337	95.92		1.13368	153.63		1.13368	62.45
1.1345	95.96		1.13448	153.68		1.13448	62.48
1.1353	95.97		1.13528	153.7		1.13528	62.52
1.1361	96		1.13607	153.73		1.13607	62.56
1.1369	96.05		1.13687	153.78		1.13687	62.6
1.1377	96.11		1.13767	153.83		1.13767	62.65
1.1385	96.17		1.13846	153.87		1.13846	62.68
1.1393	96.21		1.13926	153.89		1.13926	62.71
1.1401	96.23		1.14006	153.93		1.14006	62.75
1.1409	96.23		1.14085	153.96		1.14085	62.78
1.1417	96.22		1.14165	153.98		1.14165	62.8
1.1424	96.18		1.14245	154		1.14245	62.81
1.1432	96.1		1.14324	154		1.14324	62.84
1.144	95.99		1.14404	154		1.14404	62.89
1.1448	95.83		1.14484	153.98		1.14484	62.92
1.1456	95.65		1.14563	153.97		1.14563	62.97
1.1464	95.44		1.14643	154		1.14643	63.01
1.1472	95.2		1.14723	154.03		1.14723	63.04
1.148	94.97		1.14802	154.07		1.14802	63.07
1.1488	94.76		1.14882	154.09		1.14882	63.1
1.1496	94.57		1.14962	154.12		1.14962	63.14
1.1504	94.4		1.15041	154.16		1.15041	63.18
1.1512	94.26		1.15121	154.2		1.15121	63.22
1.152	94.13		1.15201	154.24		1.15201	63.27
1.1528	93.99		1.1528	154.28		1.1528	63.32
1.1536	93.85		1.1536	154.34		1.1536	63.36
1.1544	93.7		1.1544	154.4		1.1544	63.41
1.1552	93.57		1.15519	154.46		1.15519	63.45
1.156	93.44		1.15599	154.52		1.15599	63.5
1.1568	93.31		1.15679	154.59		1.15679	63.54
1.1576	93.18		1.15758	154.64		1.15758	63.55
1.1584	93.07		1.15838	154.7		1.15838	63.57
1.1592	92.95		1.15918	154.74		1.15918	63.59
1.16	92.82		1.15997	154.78		1.15997	63.63
1.1608	92.69		1.16077	154.83		1.16077	63.67
1.1616	92.55		1.16157	154.85		1.16157	63.71
1.1624	92.43		1.16236	154.88		1.16236	63.75
1.1632	92.32		1.16316	154.91		1.16316	63.79
1.164	92.23		1.16396	154.95		1.16396	63.83
1.1648	92.14		1.16475	154.98		1.16475	63.88
1.1656	92.02		1.16555	155.01		1.16555	63.92
1.1663	91.89		1.16635	155.01		1.16635	63.95
1.1671	91.78		1.16714	155.01		1.16714	63.97
1.1679	91.69		1.16794	155.01		1.16794	64.01
1.1687	91.63		1.16874	155.02		1.16874	64.04
1.1695	91.6		1.16953	155.04		1.16953	64.07
1.1703	91.58		1.17033	155.07		1.17033	64.12
1.1711	91.54		1.17113	155.11		1.17113	64.17
1.1719	91.49		1.17192	155.15		1.17192	64.23
1.1727	91.42		1.17272	155.19		1.17272	64.3
1.1735	91.33		1.17352	155.23		1.17352	64.37
1.1743	91.23		1.17431	155.26		1.17431	64.44
1.1751	91.13		1.17511	155.31		1.17511	64.52
1.1759	91.04		1.17591	155.36		1.17591	64.6
1.1767	90.93		1.1767	155.41		1.1767	64.67
1.1775	90.8		1.1775	155.45		1.1775	64.73
1.1783	90.67		1.1783	155.51		1.1783	64.79
1.1791	90.55		1.17909	155.56		1.17909	64.83
1.1799	90.46		1.17989	155.6		1.17989	64.87
1.1807	90.4		1.18069	155.63		1.18069	64.91
1.1815	90.39		1.18149	155.66		1.18149	64.95
1.1823	90.4		1.18228	155.67		1.18228	65
1.1831	90.44		1.18308	155.68		1.18308	65.04
1.1839	90.51		1.18388	155.7		1.18388	65.07
1.1847	90.57		1.18467	155.71		1.18467	65.07
1.1855	90.62		1.18547	155.73		1.18547	65.06
1.1863	90.65		1.18627	155.76		1.18627	65.06
1.1871	90.66		1.18706	155.79		1.18706	65.07
1.1879	90.64		1.18786	155.82		1.18786	65.08
1.1887	90.59		1.18866	155.83		1.18866	65.11
1.1895	90.54		1.18945	155.84		1.18945	65.14
1.1902	90.5		1.19025	155.85		1.19025	65.17
1.191	90.48		1.19105	155.88		1.19105	65.21
1.1918	90.48		1.19184	155.9		1.19184	65.25
1.1926	90.48		1.19264	155.93		1.19264	65.3
1.1934	90.47		1.19344	155.97		1.19344	65.35
1.1942	90.42		1.19423	156		1.19423	65.4
1.195	90.33		1.19503	156.05		1.19503	65.44
1.1958	90.23		1.19583	156.11		1.19583	65.48
1.1966	90.1		1.19662	156.16		1.19662	65.52
1.1974	89.97		1.19742	156.2		1.19742	65.56
1.1982	89.83		1.19822	156.24		1.19822	65.61
1.199	89.69		1.19901	156.29		1.19901	65.64
1.1998	89.54		1.19981	156.32		1.19981	65.65
1.2006	89.4		1.20061	156.35		1.20061	65.67
1.2014	89.26		1.2014	156.37		1.2014	65.7
1.2022	89.11		1.2022	156.38		1.2022	65.74
1.203	88.95		1.203	156.38		1.203	65.79
1.2038	88.81		1.20379	156.37		1.20379	65.84
1.2046	88.67		1.20459	156.34		1.20459	65.88
1.2054	88.52		1.20539	156.29		1.20539	65.91
1.2062	88.35		1.20618	156.25		1.20618	65.95
1.207	88.17		1.20698	156.19		1.20698	65.98
1.2078	87.98		1.20778	156.15		1.20778	66.02
1.2086	87.8		1.20857	156.11		1.20857	66.05
1.2094	87.62		1.20937	156.07		1.20937	66.08
1.2102	87.44		1.21017	156.02		1.21017	66.1
1.211	87.25		1.21096	155.96		1.21096	66.12
1.2118	87.06		1.21176	155.84		1.21176	66.14
1.2126	86.89		1.21256	155.7		1.21256	66.16
1.2134	86.74		1.21335	155.53		1.21335	66.19
1.2141	86.61		1.21415	155.36		1.21415	66.21
1.2149	86.51		1.21495	155.18		1.21495	66.23
1.2157	86.38		1.21574	154.96		1.21574	66.24
1.2165	86.23		1.21654	154.68		1.21654	66.25
1.2173	86.05		1.21734	154.4		1.21734	66.24
1.2181	85.87		1.21813	154.18		1.21813	66.25
1.2189	85.74		1.21893	154.03		1.21893	66.27
1.2197	85.67		1.21973	153.89		1.21973	66.29
1.2205	85.65		1.22052	153.79		1.22052	66.32
1.2213	85.66		1.22132	153.72		1.22132	66.35
1.2221	85.7		1.22212	153.67		1.22212	66.39
1.2229	85.77		1.22291	153.66		1.22291	66.42
1.2237	85.85		1.22371	153.67		1.22371	66.44
1.2245	85.95		1.22451	153.7		1.22451	66.48
1.2253	86.07		1.2253	153.75		1.2253	66.51
1.2261	86.21		1.2261	153.77		1.2261	66.56
1.2269	86.38		1.2269	153.8		1.2269	66.6
1.2277	86.52		1.22769	153.8		1.22769	66.63
1.2285	86.63		1.22849	153.81		1.22849	66.67
1.2293	86.73		1.22929	153.81		1.22929	66.7
1.2301	86.81		1.23008	153.8		1.23008	66.73
1.2309	86.88		1.23088	153.79		1.23088	66.77
1.2317	86.93		1.23168	153.77		1.23168	66.8
1.2325	86.97		1.23247	153.76		1.23247	66.83
1.2333	87		1.23327	153.72		1.23327	66.86
1.2341	87.04		1.23407	153.69		1.23407	66.88
1.2349	87.07		1.23486	153.64		1.23486	66.89
1.2357	87.08		1.23566	153.58		1.23566	66.89
1.2365	87.07		1.23646	153.52		1.23646	66.89
1.2373	87.04		1.23725	153.47		1.23725	66.9
1.238	86.99		1.23805	153.42		1.23805	66.91
1.2388	86.94		1.23885	153.39		1.23885	66.91
1.2396	86.9		1.23964	153.35		1.23964	66.9
1.2404	86.88		1.24044	153.3		1.24044	66.89
1.2412	86.88		1.24124	153.26		1.24124	66.87
1.242	86.86		1.24203	153.2		1.24203	66.86
1.2428	86.86		1.24283	153.14		1.24283	66.85
1.2436	86.88		1.24363	153.08		1.24363	66.84
1.2444	86.94		1.24442	153.03		1.24442	66.82
1.2452	87.01		1.24522	152.98		1.24522	66.81
1.246	87.09		1.24602	152.95		1.24602	66.8
1.2468	87.15		1.24681	152.92		1.24681	66.8
1.2476	87.2		1.24761	152.9		1.24761	66.79
1.2484	87.24		1.24841	152.86		1.24841	66.78
1.2492	87.26		1.2492	152.81		1.2492	66.76
1.25	87.28		1.25	152.77		1.25	66.7
1.2508	87.31		1.2508	152.74		1.2508	66.63
1.2516	87.34		1.25159	152.72		1.25159	66.57
1.2524	87.38		1.25239	152.71		1.25239	66.51
1.2532	87.45		1.25319	152.68		1.25319	66.45
1.254	87.54		1.25398	152.66		1.25398	66.38
1.2548	87.64		1.25478	152.63		1.25478	66.29
1.2556	87.73		1.25558	152.59		1.25558	66.2
1.2564	87.85		1.25637	152.55		1.25637	66.12
1.2572	88		1.25717	152.49		1.25717	66.05
1.258	88.14		1.25797	152.41		1.25797	65.98
1.2588	88.26		1.25876	152.33		1.25876	65.92
1.2596	88.37		1.25956	152.29		1.25956	65.86
1.2604	88.46		1.26036	152.27		1.26036	65.8
1.2612	88.52		1.26115	152.25		1.26115	65.75
1.262	88.54		1.26195	152.23		1.26195	65.68
1.2627	88.52		1.26275	152.22		1.26275	65.62
1.2635	88.48		1.26354	152.19		1.26354	65.55
1.2643	88.45		1.26434	152.16		1.26434	65.49
1.2651	88.43		1.26514	152.12		1.26514	65.44
1.2659	88.45		1.26593	152.08		1.26593	65.39
1.2667	88.48		1.26673	152.03		1.26673	65.34
1.2675	88.53		1.26753	151.98		1.26753	65.28
1.2683	88.6		1.26832	151.94		1.26832	65.21
1.2691	88.68		1.26912	151.91		1.26912	65.14
1.2699	88.74		1.26992	151.87		1.26992	65.07
1.2707	88.79		1.27071	151.81		1.27071	64.98
1.2715	88.83		1.27151	151.76		1.27151	64.89
1.2723	88.87		1.27231	151.7		1.27231	64.78
1.2731	88.94		1.2731	151.64		1.2731	64.66
1.2739	89.04		1.2739	151.59		1.2739	64.55
1.2747	89.15		1.2747	151.55		1.2747	64.45
1.2755	89.28		1.27549	151.52		1.27549	64.35
1.2763	89.44		1.27629	151.52		1.27629	64.25
1.2771	89.61		1.27709	151.54		1.27709	64.15
1.2779	89.8		1.27788	151.55		1.27788	64.06
1.2787	90		1.27868	151.53		1.27868	63.97
1.2795	90.22		1.27948	151.53		1.27948	63.89
1.2803	90.42		1.28027	151.5		1.28027	63.81
1.2811	90.63		1.28107	151.47		1.28107	63.72
1.2819	90.85		1.28187	151.44		1.28187	63.63
1.2827	91.06		1.28266	151.41		1.28266	63.53
1.2835	91.26		1.28346	151.39		1.28346	63.42
1.2843	91.44		1.28426	151.37		1.28426	63.31
1.2851	91.62		1.28505	151.37		1.28505	63.2
1.2859	91.82		1.28585	151.38		1.28585	63.09
1.2866	92.04		1.28665	151.4		1.28665	62.99
1.2874	92.27		1.28744	151.42		1.28744	62.88
1.2882	92.49		1.28824	151.43		1.28824	62.78
1.289	92.69		1.28904	151.42		1.28904	62.67
1.2898	92.92		1.28983	151.42		1.28983	62.56
1.2906	93.17		1.29063	151.43		1.29063	62.46
1.2914	93.44		1.29143	151.46		1.29143	62.36
1.2922	93.7		1.29222	151.51		1.29222	62.26
1.293	93.95		1.29302	151.6		1.29302	62.15
1.2938	94.18		1.29382	151.71		1.29382	62.06
1.2946	94.38		1.29461	151.85		1.29461	61.96
1.2954	94.58		1.29541	152.02		1.29541	61.87
1.2962	94.76		1.29621	152.24		1.29621	61.78
1.297	94.95		1.297	152.46		1.297	61.7
1.2978	95.15		1.2978	152.63		1.2978	61.63
1.2986	95.33		1.2986	152.76		1.2986	61.56
1.2994	95.47		1.29939	152.87		1.29939	61.48
1.3002	95.58		1.30019	152.96		1.30019	61.4
1.301	95.67		1.30099	153.03		1.30099	61.33
1.3018	95.74		1.30178	153.1		1.30178	61.27
1.3026	95.8		1.30258	153.16		1.30258	61.22
1.3034	95.84		1.30338	153.22		1.30338	61.17
1.3042	95.88		1.30417	153.27		1.30417	61.12
1.305	95.89		1.30497	153.31		1.30497	61.07
1.3058	95.91		1.30577	153.36		1.30577	61.01
1.3066	95.91		1.30656	153.39		1.30656	60.96
1.3074	95.93		1.30736	153.43		1.30736	60.91
1.3082	95.97		1.30816	153.47		1.30816	60.85
1.309	96.03		1.30895	153.51		1.30895	60.79
1.3098	96.12		1.30975	153.55		1.30975	60.73
1.3105	96.21		1.31055	153.59		1.31055	60.66
1.3113	96.3		1.31134	153.63		1.31134	60.59
1.3121	96.37		1.31214	153.66		1.31214	60.51
1.3129	96.43		1.31294	153.7		1.31294	60.42
1.3137	96.48		1.31373	153.73		1.31373	60.33
1.3145	96.51		1.31453	153.78		1.31453	60.25
1.3153	96.54		1.31533	153.83		1.31533	60.19
1.3161	96.58		1.31612	153.89		1.31612	60.13
1.3169	96.65		1.31692	153.93		1.31692	60.07
1.3177	96.73		1.31772	153.97		1.31772	60.02
1.3185	96.81		1.31851	154.01		1.31851	59.97
1.3193	96.88		1.31931	154.07		1.31931	59.92
1.3201	96.93		1.32011	154.1		1.32011	59.87
1.3209	96.96		1.32091	154.14		1.32091	59.83
1.3217	96.99		1.3217	154.19		1.3217	59.8
1.3225	97		1.3225	154.25		1.3225	59.77
1.3233	96.98		1.3233	154.31		1.3233	59.74
1.3241	96.91		1.32409	154.38		1.32409	59.72
1.3249	96.83		1.32489	154.45		1.32489	59.7
1.3257	96.77		1.32569	154.51		1.32569	59.69
1.3265	96.71		1.32648	154.6		1.32648	59.66
1.3273	96.68		1.32728	154.65		1.32728	59.62
1.3281	96.65		1.32808	154.71		1.32808	59.58
1.3289	96.64		1.32887	154.78		1.32887	59.55
1.3297	96.61		1.32967	154.84		1.32967	59.54
1.3305	96.58		1.33047	154.9		1.33047	59.54
1.3313	96.55		1.33126	154.95		1.33126	59.53
1.3321	96.54		1.33206	154.97		1.33206	59.53
1.3329	96.54		1.33286	155.01		1.33286	59.53
1.3337	96.54		1.33365	155.02		1.33365	59.54
1.3344	96.54		1.33445	155.02		1.33445	59.54
1.3352	96.53		1.33525	155.02		1.33525	59.55
1.336	96.49		1.33604	155.03		1.33604	59.56
1.3368	96.42		1.33684	155.06		1.33684	59.57
1.3376	96.34		1.33764	155.09		1.33764	59.58
1.3384	96.25		1.33843	155.12		1.33843	59.59
1.3392	96.16		1.33923	155.12		1.33923	59.6
1.34	96.06		1.34003	155.1		1.34003	59.61
1.3408	95.96		1.34082	155.08		1.34082	59.62
1.3416	95.9		1.34162	155.09		1.34162	59.64
1.3424	95.87		1.34242	155.07		1.34242	59.65
1.3432	95.85		1.34321	155.06		1.34321	59.68
1.344	95.84		1.34401	155.06		1.34401	59.71
1.3448	95.84		1.34481	155.06		1.34481	59.73
1.3456	95.8		1.3456	155.07		1.3456	59.73
1.3464	95.75		1.3464	155.1		1.3464	59.72
1.3472	95.69		1.3472	155.14		1.3472	59.72
1.348	95.62		1.34799	155.17		1.34799	59.72
1.3488	95.53		1.34879	155.18		1.34879	59.72
1.3496	95.45		1.34959	155.18		1.34959	59.72
1.3504	95.37		1.35038	155.19		1.35038	59.73
1.3512	95.29		1.35118	155.17		1.35118	59.74
1.352	95.21		1.35198	155.15		1.35198	59.76
1.3528	95.11		1.35277	155.1		1.35277	59.79
1.3536	94.98		1.35357	155.05		1.35357	59.81
1.3544	94.84		1.35437	154.98		1.35437	59.82
1.3552	94.7		1.35516	154.91		1.35516	59.83
1.356	94.56		1.35596	154.85		1.35596	59.85
1.3568	94.43		1.35676	154.77		1.35676	59.87
1.3576	94.3		1.35755	154.71		1.35755	59.89
1.3583	94.14		1.35835	154.67		1.35835	59.93
1.3591	93.95		1.35915	154.64		1.35915	59.97
1.3599	93.75		1.35994	154.65		1.35994	60
1.3607	93.54		1.36074	154.67		1.36074	60.04
1.3615	93.33		1.36154	154.71		1.36154	60.07
1.3623	93.15		1.36233	154.75		1.36233	60.1
1.3631	92.97		1.36313	154.79		1.36313	60.14
1.3639	92.81		1.36393	154.85		1.36393	60.18
1.3647	92.67		1.36472	154.9		1.36472	60.21
1.3655	92.53		1.36552	154.92		1.36552	60.24
1.3663	92.4		1.36632	154.92		1.36632	60.27
1.3671	92.27		1.36711	154.91		1.36711	60.31
1.3679	92.13		1.36791	154.9		1.36791	60.34
1.3687	91.99		1.36871	154.91		1.36871	60.37
1.3695	91.82		1.3695	154.93		1.3695	60.41
1.3703	91.63		1.3703	154.94		1.3703	60.45
1.3711	91.42		1.3711	154.97		1.3711	60.48
1.3719	91.2		1.37189	155.02		1.37189	60.51
1.3727	91.01		1.37269	155.04		1.37269	60.55
1.3735	90.85		1.37349	155.06		1.37349	60.58
1.3743	90.74		1.37428	155.09		1.37428	60.62
1.3751	90.66		1.37508	155.13		1.37508	60.66
1.3759	90.61		1.37588	155.17		1.37588	60.7
1.3767	90.58		1.37667	155.2		1.37667	60.74
1.3775	90.56		1.37747	155.22		1.37747	60.77
1.3783	90.53		1.37827	155.25		1.37827	60.8
1.3791	90.49		1.37906	155.29		1.37906	60.83
1.3799	90.43		1.37986	155.32		1.37986	60.85
1.3807	90.36		1.38066	155.34		1.38066	60.87
1.3815	90.3		1.38145	155.33		1.38145	60.88
1.3822	90.24		1.38225	155.31		1.38225	60.87
1.383	90.2		1.38305	155.27		1.38305	60.87
1.3838	90.16		1.38384	155.24		1.38384	60.86
1.3846	90.15		1.38464	155.22		1.38464	60.85
1.3854	90.13		1.38544	155.2		1.38544	60.85
1.3862	90.11		1.38623	155.19		1.38623	60.85
1.387	90.1		1.38703	155.17		1.38703	60.86
1.3878	90.1		1.38783	155.14		1.38783	60.87
1.3886	90.08		1.38862	155.11		1.38862	60.87
1.3894	90.06		1.38942	155.08		1.38942	60.87
1.3902	90.04		1.39022	155.06		1.39022	60.88
1.391	90.02		1.39101	155.04		1.39101	60.89
1.3918	90.02		1.39181	155		1.39181	60.91
1.3926	90.03		1.39261	154.97		1.39261	60.94
1.3934	90.06		1.3934	154.95		1.3934	60.98
1.3942	90.12		1.3942	154.95		1.3942	61.01
1.395	90.21		1.395	154.99		1.395	61.02
1.3958	90.32		1.39579	155.01		1.39579	61.03
1.3966	90.4		1.39659	155.08		1.39659	61.05
1.3974	90.48		1.39739	155.12		1.39739	61.06
1.3982	90.55		1.39818	155.17		1.39818	61.08
1.399	90.64		1.39898	155.19		1.39898	61.1
1.3998	90.73		1.39978	155.23		1.39978	61.12
1.4006	90.83		1.40057	155.24		1.40057	61.13
1.4014	90.94		1.40137	155.26		1.40137	61.13
1.4022	91.05		1.40217	155.29		1.40217	61.13
1.403	91.17		1.40296	155.32		1.40296	61.12
1.4038	91.29		1.40376	155.34		1.40376	61.1
1.4046	91.38		1.40456	155.34		1.40456	61.08
1.4054	91.43		1.40535	155.34		1.40535	61.05
1.4062	91.46		1.40615	155.32		1.40615	61.03
1.4069	91.46		1.40695	155.31		1.40695	61.02
1.4077	91.46		1.40774	155.29		1.40774	61.02
1.4085	91.47		1.40854	155.27		1.40854	61.02
1.4093	91.51		1.40934	155.25		1.40934	61.02
1.4101	91.56		1.41013	155.2		1.41013	61.02
1.4109	91.58		1.41093	155.15		1.41093	61.02
1.4117	91.57		1.41173	155.12		1.41173	61.02
1.4125	91.54		1.41252	155.09		1.41252	61.02
1.4133	91.52		1.41332	155.07		1.41332	61.03
1.4141	91.5		1.41412	155.07		1.41412	61.05
1.4149	91.5		1.41491	155.1		1.41491	61.07
1.4157	91.51		1.41571	155.13		1.41571	61.1
1.4165	91.55		1.41651	155.16		1.41651	61.14
1.4173	91.59		1.4173	155.19		1.4173	61.19
1.4181	91.64		1.4181	155.22		1.4181	61.23
1.4189	91.66		1.4189	155.26		1.4189	61.27
1.4197	91.67		1.41969	155.32		1.41969	61.3
1.4205	91.67		1.42049	155.37		1.42049	61.33
1.4213	91.66		1.42129	155.41		1.42129	61.36
1.4221	91.66		1.42208	155.47		1.42208	61.39
1.4229	91.67		1.42288	155.53		1.42288	61.42
1.4237	91.7		1.42368	155.59		1.42368	61.45
1.4245	91.74		1.42447	155.65		1.42447	61.49
1.4253	91.79		1.42527	155.68		1.42527	61.54
1.4261	91.83		1.42607	155.72		1.42607	61.59
1.4269	91.87		1.42686	155.76		1.42686	61.64
1.4277	91.9		1.42766	155.82		1.42766	61.7
1.4285	91.93		1.42846	155.88		1.42846	61.75
1.4293	91.95		1.42925	155.95		1.42925	61.8
1.4301	91.98		1.43005	156.03		1.43005	61.84
1.4308	91.98		1.43085	156.13		1.43085	61.88
1.4316	92		1.43164	156.22		1.43164	61.93
1.4324	92.04		1.43244	156.33		1.43244	61.99
1.4332	92.1		1.43324	156.45		1.43324	62.06
1.434	92.17		1.43403	156.55		1.43403	62.14
1.4348	92.23		1.43483	156.65		1.43483	62.22
1.4356	92.27		1.43563	156.72		1.43563	62.29
1.4364	92.29		1.43642	156.79		1.43642	62.35
1.4372	92.32		1.43722	156.84		1.43722	62.4
1.438	92.37		1.43802	156.89		1.43802	62.44
1.4388	92.43		1.43881	156.94		1.43881	62.48
1.4396	92.51		1.43961	156.98		1.43961	62.52
1.4404	92.59		1.44041	157.03		1.44041	62.55
1.4412	92.67		1.4412	157.07		1.4412	62.59
1.442	92.74		1.442	157.11		1.442	62.63
1.4428	92.8		1.4428	157.14		1.4428	62.66
1.4436	92.86		1.44359	157.16		1.44359	62.68
1.4444	92.91		1.44439	157.18		1.44439	62.71
1.4452	92.96		1.44519	157.22		1.44519	62.73
1.446	92.99		1.44598	157.29		1.44598	62.74
1.4468	93		1.44678	157.37		1.44678	62.75
1.4476	93.03		1.44758	157.48		1.44758	62.77
1.4484	93.08		1.44837	157.58		1.44837	62.8
1.4492	93.17		1.44917	157.68		1.44917	62.82
1.45	93.28		1.44997	157.78		1.44997	62.84
1.4508	93.42		1.45076	157.87		1.45076	62.86
1.4516	93.57		1.45156	157.93		1.45156	62.89
1.4524	93.7		1.45236	157.99		1.45236	62.92
1.4532	93.76		1.45315	158.02		1.45315	62.95
1.454	93.76		1.45395	158.04		1.45395	62.98
1.4547	93.72		1.45475	158.04		1.45475	63.02
1.4555	93.65		1.45554	158.05		1.45554	63.06
1.4563	93.58		1.45634	158.06		1.45634	63.1
1.4571	93.49		1.45714	158.1		1.45714	63.13
1.4579	93.41		1.45793	158.13		1.45793	63.15
1.4587	93.33		1.45873	158.16		1.45873	63.16
1.4595	93.28		1.45953	158.2		1.45953	63.16
1.4603	93.24		1.46033	158.23		1.46033	63.16
1.4611	93.21		1.46112	158.26		1.46112	63.16
1.4619	93.18		1.46192	158.28		1.46192	63.17
1.4627	93.15		1.46272	158.3		1.46272	63.17
1.4635	93.14		1.46351	158.31		1.46351	63.16
1.4643	93.13		1.46431	158.29		1.46431	63.16
1.4651	93.11		1.46511	158.25		1.46511	63.14
1.4659	93.09		1.4659	158.21		1.4659	63.12
1.4667	93.05		1.4667	158.19		1.4667	63.11
1.4675	93		1.4675	158.15		1.4675	63.1
1.4683	92.92		1.46829	158.1		1.46829	63.09
1.4691	92.84		1.46909	158.07		1.46909	63.08
1.4699	92.75		1.46989	158.04		1.46989	63.05
1.4707	92.65		1.47068	158.02		1.47068	63.03
1.4715	92.56		1.47148	158.02		1.47148	63.01
1.4723	92.47		1.47228	157.99		1.47228	62.99
1.4731	92.38		1.47307	157.94		1.47307	62.97
1.4739	92.29		1.47387	157.86		1.47387	62.95
1.4747	92.2		1.47467	157.74		1.47467	62.94
1.4755	92.1		1.47546	157.64		1.47546	62.94
1.4763	92.04		1.47626	157.52		1.47626	62.94
1.4771	92		1.47706	157.41		1.47706	62.95
1.4779	91.99		1.47785	157.29		1.47785	62.96
1.4786	91.97		1.47865	157.19		1.47865	62.96
1.4794	91.95		1.47945	157.1		1.47945	62.96
1.4802	91.93		1.48024	157.03		1.48024	62.97
1.481	91.89		1.48104	156.94		1.48104	62.98
1.4818	91.86		1.48184	156.84		1.48184	63
1.4826	91.83		1.48263	156.74		1.48263	63.04
1.4834	91.82		1.48343	156.66		1.48343	63.09
1.4842	91.84		1.48423	156.62		1.48423	63.14
1.485	91.87		1.48502	156.58		1.48502	63.21
1.4858	91.91		1.48582	156.52		1.48582	63.27
1.4866	91.92		1.48662	156.47		1.48662	63.32
1.4874	91.92		1.48741	156.42		1.48741	63.37
1.4882	91.9		1.48821	156.36		1.48821	63.41
1.489	91.87		1.48901	156.27		1.48901	63.45
1.4898	91.83		1.4898	156.21		1.4898	63.49
1.4906	91.83		1.4906	156.13		1.4906	63.52
1.4914	91.86		1.4914	156.03		1.4914	63.54
1.4922	91.92		1.49219	155.94		1.49219	63.56
1.493	91.97		1.49299	155.87		1.49299	63.57
1.4938	92.03		1.49379	155.79		1.49379	63.59
1.4946	92.09		1.49458	155.68		1.49458	63.6
1.4954	92.14		1.49538	155.56		1.49538	63.6
1.4962	92.17		1.49618	155.44		1.49618	63.58
1.497	92.19		1.49697	155.32		1.49697	63.55
1.4978	92.19		1.49777	155.2		1.49777	63.54
1.4986	92.2		1.49857	155.09		1.49857	63.52
1.4994	92.22		1.49936	154.97		1.49936	63.5
1.5002	92.23		1.50016	154.85		1.50016	63.48
1.501	92.23		1.50096	154.74		1.50096	63.45
1.5018	92.22		1.50175	154.65		1.50175	63.43
1.5025	92.22		1.50255	154.57		1.50255	63.4
1.5033	92.18		1.50335	154.51		1.50335	63.37
1.5041	92.13		1.50414	154.46		1.50414	63.33
1.5049	92.09		1.50494	154.42		1.50494	63.29
1.5057	92.07		1.50574	154.36		1.50574	63.24
1.5065	92.06		1.50653	154.28		1.50653	63.19
1.5073	92.07		1.50733	154.19		1.50733	63.13
1.5081	92.1		1.50813	154.1		1.50813	63.07
1.5089	92.15		1.50892	154.01		1.50892	63.01
1.5097	92.19		1.50972	153.91		1.50972	62.95
1.5105	92.27		1.51052	153.79		1.51052	62.89
1.5113	92.32		1.51131	153.69		1.51131	62.82
1.5121	92.34		1.51211	153.59		1.51211	62.74
1.5129	92.36		1.51291	153.48		1.51291	62.65
1.5137	92.36		1.5137	153.39		1.5137	62.55
1.5145	92.34		1.5145	153.29		1.5145	62.45
1.5153	92.32		1.5153	153.21		1.5153	62.35
1.5161	92.31		1.51609	153.16		1.51609	62.26
1.5169	92.3		1.51689	153.12		1.51689	62.18
1.5177	92.29		1.51769	153.08		1.51769	62.09
1.5185	92.28		1.51848	153.01		1.51848	62
1.5193	92.28		1.51928	152.94		1.51928	61.92
1.5201	92.28		1.52008	152.86		1.52008	61.84
1.5209	92.27		1.52087	152.78		1.52087	61.76
1.5217	92.25		1.52167	152.69		1.52167	61.68
1.5225	92.22		1.52247	152.64		1.52247	61.61
1.5233	92.18		1.52326	152.6		1.52326	61.56
1.5241	92.12		1.52406	152.59		1.52406	61.52
1.5249	92.05		1.52486	152.61		1.52486	61.49
1.5257	92		1.52565	152.63		1.52565	61.46
1.5264	91.96		1.52645	152.63		1.52645	61.43
1.5272	91.92		1.52725	152.61		1.52725	61.4
1.528	91.9		1.52804	152.59		1.52804	61.37
1.5288	91.87		1.52884	152.58		1.52884	61.34
1.5296	91.84		1.52964	152.58		1.52964	61.29
1.5304	91.79		1.53043	152.59		1.53043	61.24
1.5312	91.73		1.53123	152.6		1.53123	61.19
1.532	91.66		1.53203	152.61		1.53203	61.15
1.5328	91.63		1.53282	152.64		1.53282	61.1
1.5336	91.61		1.53362	152.68		1.53362	61.05
1.5344	91.59		1.53442	152.74		1.53442	60.99
1.5352	91.57		1.53521	152.79		1.53521	60.93
1.536	91.52		1.53601	152.83		1.53601	60.87
1.5368	91.47		1.53681	152.83		1.53681	60.83
1.5376	91.4		1.5376	152.8		1.5376	60.78
1.5384	91.33		1.5384	152.75		1.5384	60.74
1.5392	91.24		1.5392	152.67		1.5392	60.7
1.54	91.15		1.53999	152.61		1.53999	60.66
1.5408	91.05		1.54079	152.56		1.54079	60.62
1.5416	90.96		1.54159	152.52		1.54159	60.57
1.5424	90.87		1.54238	152.48		1.54238	60.52
1.5432	90.77		1.54318	152.43		1.54318	60.49
1.544	90.67		1.54398	152.38		1.54398	60.45
1.5448	90.59		1.54477	152.35		1.54477	60.43
1.5456	90.52		1.54557	152.31		1.54557	60.41
1.5464	90.47		1.54637	152.28		1.54637	60.39
1.5472	90.43		1.54716	152.28		1.54716	60.36
1.548	90.42		1.54796	152.32		1.54796	60.33
1.5488	90.39		1.54876	152.35		1.54876	60.3
1.5496	90.37		1.54955	152.39		1.54955	60.28
1.5504	90.35		1.55035	152.42		1.55035	60.25
1.5511	90.33		1.55115	152.45		1.55115	60.23
1.5519	90.32		1.55194	152.5		1.55194	60.21
1.5527	90.29		1.55274	152.56		1.55274	60.18
1.5535	90.25		1.55354	152.62		1.55354	60.17
1.5543	90.19		1.55433	152.68		1.55433	60.16
1.5551	90.14		1.55513	152.74		1.55513	60.14
1.5559	90.08		1.55593	152.8		1.55593	60.11
1.5567	90.01		1.55672	152.88		1.55672	60.07
1.5575	89.92		1.55752	152.96		1.55752	60.01
1.5583	89.84		1.55832	153.05		1.55832	59.96
1.5591	89.75		1.55911	153.13		1.55911	59.92
1.5599	89.66		1.55991	153.21		1.55991	59.87
1.5607	89.57		1.56071	153.28		1.56071	59.83
1.5615	89.46		1.5615	153.33		1.5615	59.77
1.5623	89.35		1.5623	153.38		1.5623	59.7
1.5631	89.23		1.5631	153.41		1.5631	59.63
1.5639	89.12		1.56389	153.43		1.56389	59.56
1.5647	89.02		1.56469	153.45		1.56469	59.48
1.5655	88.95		1.56549	153.5		1.56549	59.41
1.5663	88.92		1.56628	153.55		1.56628	59.34
1.5671	88.9		1.56708	153.62		1.56708	59.26
1.5679	88.88		1.56788	153.69		1.56788	59.19
1.5687	88.86		1.56867	153.79		1.56867	59.12
1.5695	88.84		1.56947	153.89		1.56947	59.05
1.5703	88.82		1.57027	154.01		1.57027	58.99
1.5711	88.79		1.57106	154.13		1.57106	58.93
1.5719	88.73		1.57186	154.24		1.57186	58.86
1.5727	88.69		1.57266	154.34		1.57266	58.79
1.5735	88.65		1.57345	154.43		1.57345	58.71
1.5743	88.62		1.57425	154.53		1.57425	58.63
1.575	88.58		1.57505	154.63		1.57505	58.56
1.5758	88.54		1.57584	154.74		1.57584	58.49
1.5766	88.5		1.57664	154.86		1.57664	58.43
1.5774	88.47		1.57744	154.97		1.57744	58.37
1.5782	88.45		1.57823	155.06		1.57823	58.32
1.579	88.44		1.57903	155.17		1.57903	58.27
1.5798	88.45		1.57983	155.27		1.57983	58.23
1.5806	88.46		1.58062	155.38		1.58062	58.21
1.5814	88.48		1.58142	155.46		1.58142	58.19
1.5822	88.5		1.58222	155.53		1.58222	58.17
1.583	88.55		1.58301	155.57		1.58301	58.15
1.5838	88.62		1.58381	155.59		1.58381	58.13
1.5846	88.69		1.58461	155.59		1.58461	58.11
1.5854	88.76		1.5854	155.61		1.5854	58.09
1.5862	88.83		1.5862	155.63		1.5862	58.07
1.587	88.89		1.587	155.65		1.587	58.05
1.5878	88.92		1.58779	155.67		1.58779	58.04
1.5886	88.94		1.58859	155.71		1.58859	58.04
1.5894	88.94		1.58939	155.75		1.58939	58.04
1.5902	88.92		1.59018	155.83		1.59018	58.04
[truncated: 27,066 more rows]

## Sheet: B
Rate of change (A.U./cm)
Graying Head	Reversal Head	Graying Pubic	Reversal Pubic
253.657	107.408	162.562	324.574
17.9903		127.948	371.823
150.14		324.856	239.229
11.4922			377.322
36.2719	41.5349		433.855
18.0958	40.1031		198.975
104.799	268.242
158.677	533.158
23.8399
15.0456	54.5486
14.1185
22.2111	30.3848
9.0495
93.7861	53.0233
	28.9108
	188.337
	67.8777
	41.9666
	57.0016
	21.8438
20.9039	132.67
74.0963	32.3699
	21.1497
21.1406	43.7959
	47.9676
	25.3817
	31.472
	59.0153
	23.859
703.77	159.578
248.808	1275.39
	70.2575
	56.4621
26.5569	109.754
46.3886	152.572
59.0696	107.438
	2.67243
38.6287	80.447
	111.684
	112.912

## Sheet: C
Note: Hairs were scanned from root (0 cm) to tip, but are graphed from tip (as 0 cm) to root. Therefore, all hairs are reversed when graphed.
Transition Hairs
Distance (cm)	Intensity (A.U.)		Distance (cm)	Intensity (A.U.)		Distance (cm)	Intensity (A.U.)		Distance (cm)	Intensity (A.U.)
0	39.57		0	49.63		0	16.37		0	21.77
0.0008	39.53		0.0008	49.7		0.0008	16.37		0.0008	21.71
0.0016	39.49		0.0016	49.77		0.0016	16.37		0.0016	21.66
0.0024	39.46		0.0024	49.83		0.0024	16.37		0.0024	21.62
0.0032	39.43		0.0032	49.88		0.0032	16.37		0.0032	21.6
0.004	39.41		0.004	49.92		0.004	16.35		0.004	21.58
0.0048	39.4		0.0048	49.96		0.0048	16.32		0.0048	21.53
0.0056	39.4		0.0056	50		0.0056	16.28		0.0056	21.47
0.0064	39.4		0.0064	50.04		0.0064	16.25		0.0064	21.41
0.0072	39.4		0.0072	50.07		0.0072	16.23		0.0072	21.36
0.008	39.4		0.008	50.09		0.008	16.22		0.008	21.32
0.0088	39.4		0.0088	50.09		0.0088	16.22		0.0088	21.29
0.0096	39.4		0.0096	50.08		0.0096	16.21		0.0096	21.26
0.0104	39.4		0.0104	50.06		0.0104	16.2		0.0104	21.21
0.0112	39.48		0.0112	50.05		0.0112	16.21		0.0112	21.15
0.012	39.57		0.012	50.04		0.012	16.22		0.012	21.08
0.0127	39.59		0.0127	50.04		0.0127	16.24		0.0127	21
0.0135	39.58		0.0135	50.06		0.0135	16.25		0.0135	20.93
0.0143	39.55		0.0143	50.11		0.0143	16.25		0.0143	20.84
0.0151	39.53		0.0151	50.21		0.0151	16.27		0.0151	20.75
0.0159	39.52		0.0159	50.35		0.0159	16.29		0.0159	20.66
0.0167	39.53		0.0167	50.53		0.0167	16.3		0.0167	20.56
0.0175	39.54		0.0175	50.73		0.0175	16.3		0.0175	20.47
0.0183	39.57		0.0183	50.91		0.0183	16.29		0.0183	20.39
0.0191	39.63		0.0191	51.07		0.0191	16.29		0.0191	20.32
0.0199	39.71		0.0199	51.19		0.0199	16.3		0.0199	20.26
0.0207	39.77		0.0207	51.27		0.0207	16.31		0.0207	20.19
0.0215	39.8		0.0215	51.32		0.0215	16.32		0.0215	20.11
0.0223	39.82		0.0223	51.33		0.0223	16.31		0.0223	20.03
0.0231	39.81		0.0231	51.34		0.0231	16.31		0.0231	19.95
0.0239	39.81		0.0239	51.37		0.0239	16.29		0.0239	19.88
0.0247	39.8		0.0247	51.41		0.0247	16.28		0.0247	19.8
0.0255	39.79		0.0255	51.47		0.0255	16.27		0.0255	19.71
0.0263	39.77		0.0263	51.53		0.0263	16.24		0.0263	19.62
0.0271	39.76		0.0271	51.59		0.0271	16.21		0.0271	19.52
0.0279	39.76		0.0279	51.63		0.0279	16.2		0.0279	19.42
0.0287	39.77		0.0287	51.65		0.0287	16.19		0.0287	19.33
0.0295	39.79		0.0295	51.64		0.0295	16.19		0.0295	19.24
0.0303	39.81		0.0303	51.6		0.0303	16.19		0.0303	19.14
0.0311	39.82		0.0311	51.54		0.0311	16.19		0.0311	19.04
0.0319	39.83		0.0319	51.49		0.0319	16.2		0.0319	18.93
0.0327	39.84		0.0327	51.45		0.0327	16.2		0.0327	18.82
0.0335	39.85		0.0335	51.44		0.0335	16.2		0.0335	18.72
0.0343	39.86		0.0343	51.44		0.0343	16.19		0.0343	18.63
0.0351	39.87		0.0351	51.45		0.0351	16.17		0.0351	18.56
0.0359	39.87		0.0359	51.46		0.0359	16.15		0.0359	18.49
0.0366	39.87		0.0366	51.47		0.0366	16.13		0.0366	18.41
0.0374	39.87		0.0374	51.47		0.0374	16.12		0.0374	18.34
0.0382	39.88		0.0382	51.48		0.0382	16.11		0.0382	18.27
0.039	39.89		0.039	51.5		0.039	16.09		0.039	18.22
0.0398	39.82		0.0398	51.54		0.0398	16.09		0.0398	18.2
0.0406	39.69		0.0406	51.62		0.0406	16.1		0.0406	18.21
0.0414	39.52		0.0414	51.73		0.0414	16.11		0.0414	18.23
0.0422	39.41		0.0422	51.86		0.0422	16.13		0.0422	18.25
0.043	39.39		0.043	52.01		0.043	16.14		0.043	18.27
0.0438	39.42		0.0438	52.17		0.0438	16.16		0.0438	18.3
0.0446	39.44		0.0446	52.35		0.0446	16.18		0.0446	18.33
0.0454	39.46		0.0454	52.54		0.0454	16.22		0.0454	18.38
0.0462	39.47		0.0462	52.71		0.0462	16.25		0.0462	18.45
0.047	39.48		0.047	52.87		0.047	16.27		0.047	18.52
0.0478	39.49		0.0478	53		0.0478	16.29		0.0478	18.6
0.0486	39.49		0.0486	53.1		0.0486	16.3		0.0486	18.69
0.0494	39.48		0.0494	53.18		0.0494	16.3		0.0494	18.78
0.0502	39.48		0.0502	53.26		0.0502	16.29		0.0502	18.87
0.051	39.47		0.051	53.37		0.051	16.28		0.051	18.95
0.0518	39.48		0.0518	53.51		0.0518	16.26		0.0518	19.03
0.0526	39.48		0.0526	53.66		0.0526	16.25		0.0526	19.1
0.0534	39.5		0.0534	53.83		0.0534	16.24		0.0534	19.16
0.0542	39.51		0.0542	54.02		0.0542	16.23		0.0542	19.22
0.055	39.53		0.055	54.24		0.055	16.21		0.055	19.27
0.0558	39.54		0.0558	54.48		0.0558	16.2		0.0558	19.33
0.0566	39.55		0.0566	54.74		0.0566	16.19		0.0566	19.38
0.0574	39.55		0.0574	55		0.0574	16.18		0.0574	19.42
0.0582	39.54		0.0582	55.25		0.0582	16.19		0.0582	19.46
0.059	39.54		0.059	55.49		0.059	16.21		0.059	19.51
0.0598	39.53		0.0598	55.73		0.0598	16.23		0.0598	19.56
0.0605	39.52		0.0605	55.97		0.0605	16.24		0.0605	19.6
0.0613	39.52		0.0613	56.22		0.0613	16.24		0.0613	19.65
0.0621	39.53		0.0621	56.48		0.0621	16.24		0.0621	19.7
0.0629	39.53		0.0629	56.75		0.0629	16.22		0.0629	19.74
0.0637	39.53		0.0637	57.02		0.0637	16.21		0.0637	19.78
0.0645	39.53		0.0645	57.29		0.0645	16.18		0.0645	19.82
0.0653	39.52		0.0653	57.57		0.0653	16.13		0.0653	19.85
0.0661	39.52		0.0661	57.87		0.0661	16.08		0.0661	19.88
0.0669	39.51		0.0669	58.16		0.0669	16.03		0.0669	19.92
0.0677	39.49		0.0677	58.44		0.0677	15.98		0.0677	19.94
0.0685	39.45		0.0685	58.71		0.0685	15.93		0.0685	19.95
0.0693	39.38		0.0693	58.96		0.0693	15.88		0.0693	19.93
0.0701	39.34		0.0701	59.18		0.0701	15.85		0.0701	19.9
0.0709	39.32		0.0709	59.39		0.0709	15.84		0.0709	19.87
0.0717	39.29		0.0717	59.6		0.0717	15.85		0.0717	19.85
0.0725	39.27		0.0725	59.82		0.0725	15.86		0.0725	19.84
0.0733	39.24		0.0733	60.07		0.0733	15.86		0.0733	19.83
0.0741	39.22		0.0741	60.33		0.0741	15.85		0.0741	19.82
0.0749	39.21		0.0749	60.58		0.0749	15.84		0.0749	19.82
0.0757	39.21		0.0757	60.84		0.0757	15.84		0.0757	19.82
0.0765	39.2		0.0765	61.11		0.0765	15.85		0.0765	19.81
0.0773	39.18		0.0773	61.38		0.0773	15.86		0.0773	19.78
0.0781	39.17		0.0781	61.65		0.0781	15.87		0.0781	19.73
0.0789	39.16		0.0789	61.89		0.0789	15.88		0.0789	19.68
0.0797	39.16		0.0797	62.11		0.0797	15.88		0.0797	19.63
0.0805	39.18		0.0805	62.32		0.0805	15.85		0.0805	19.6
0.0813	39.22		0.0813	62.54		0.0813	15.81		0.0813	19.57
0.0821	39.25		0.0821	62.77		0.0821	15.77		0.0821	19.52
0.0829	39.26		0.0829	63.03		0.0829	15.72		0.0829	19.46
0.0837	39.27		0.0837	63.31		0.0837	15.68		0.0837	19.39
0.0844	39.27		0.0844	63.59		0.0844	15.64		0.0844	19.34
0.0852	39.27		0.0852	63.88		0.0852	15.59		0.0852	19.3
0.086	39.27		0.086	64.15		0.086	15.55		0.086	19.25
0.0868	39.26		0.0868	64.4		0.0868	15.5		0.0868	19.2
0.0876	39.24		0.0876	64.63		0.0876	15.46		0.0876	19.15
0.0884	39.22		0.0884	64.85		0.0884	15.43		0.0884	19.08
0.0892	39.2		0.0892	65.05		0.0892	15.41		0.0892	19
0.09	39.18		0.09	65.23		0.09	15.39		0.09	18.92
0.0908	39.1		0.0908	65.38		0.0908	15.36		0.0908	18.85
0.0916	38.99		0.0916	65.52		0.0916	15.33		0.0916	18.79
0.0924	38.94		0.0924	65.64		0.0924	15.3		0.0924	18.75
0.0932	38.91		0.0932	65.73		0.0932	15.27		0.0932	18.71
0.094	38.89		0.094	65.78		0.094	15.24		0.094	18.7
0.0948	38.87		0.0948	65.78		0.0948	15.2		0.0948	18.7
0.0956	38.85		0.0956	65.73		0.0956	15.16		0.0956	18.72
0.0964	38.82		0.0964	65.65		0.0964	15.13		0.0964	18.76
0.0972	38.79		0.0972	65.55		0.0972	15.11		0.0972	18.81
0.098	38.73		0.098	65.47		0.098	15.09		0.098	18.86
0.0988	38.64		0.0988	65.42		0.0988	15.05		0.0988	18.91
0.0996	38.52		0.0996	65.42		0.0996	15.01		0.0996	18.94
0.1004	38.43		0.1004	65.47		0.1004	14.96		0.1004	18.96
0.1012	38.36		0.1012	65.56		0.1012	14.91		0.1012	18.99
0.102	38.3		0.102	65.7		0.102	14.87		0.102	19.03
0.1028	38.27		0.1028	65.86		0.1028	14.83		0.1028	19.06
0.1036	38.23		0.1036	66.01		0.1036	14.79		0.1036	19.08
0.1044	38.18		0.1044	66.17		0.1044	14.75		0.1044	19.1
0.1052	38.13		0.1052	66.32		0.1052	14.72		0.1052	19.13
0.106	38.08		0.106	66.44		0.106	14.71		0.106	19.17
0.1068	38.02		0.1068	66.55		0.1068	14.69		0.1068	19.21
0.1076	37.96		0.1076	66.66		0.1076	14.64		0.1076	19.26
0.1083	37.91		0.1083	66.77		0.1083	14.59		0.1083	19.31
0.1091	37.86		0.1091	66.88		0.1091	14.53		0.1091	19.35
0.1099	37.81		0.1099	67		0.1099	14.47		0.1099	19.38
0.1107	37.78		0.1107	67.12		0.1107	14.42		0.1107	19.41
0.1115	37.74		0.1115	67.21		0.1115	14.37		0.1115	19.45
0.1123	37.69		0.1123	67.27		0.1123	14.33		0.1123	19.49
0.1131	37.64		0.1131	67.3		0.1131	14.29		0.1131	19.52
0.1139	37.59		0.1139	67.34		0.1139	14.25		0.1139	19.55
0.1147	37.54		0.1147	67.37		0.1147	14.23		0.1147	19.57
0.1155	37.5		0.1155	67.4		0.1155	14.21		0.1155	19.59
0.1163	37.45		0.1163	67.42		0.1163	14.2		0.1163	19.61
0.1171	37.39		0.1171	67.44		0.1171	14.18		0.1171	19.62
0.1179	37.32		0.1179	67.45		0.1179	14.16		0.1179	19.63
0.1187	37.25		0.1187	67.45		0.1187	14.16		0.1187	19.63
0.1195	37.19		0.1195	67.44		0.1195	14.15		0.1195	19.61
0.1203	37.1		0.1203	67.39		0.1203	14.13		0.1203	19.56
0.1211	37.02		0.1211	67.3		0.1211	14.1		0.1211	19.49
0.1219	36.93		0.1219	67.18		0.1219	14.04		0.1219	19.41
0.1227	36.84		0.1227	67.03		0.1227	13.97		0.1227	19.32
0.1235	36.74		0.1235	66.87		0.1235	13.9		0.1235	19.21
0.1243	36.65		0.1243	66.68		0.1243	13.83		0.1243	19.09
0.1251	36.55		0.1251	66.46		0.1251	13.76		0.1251	18.96
0.1259	36.46		0.1259	66.23		0.1259	13.69		0.1259	18.82
0.1267	36.37		0.1267	65.99		0.1267	13.62		0.1267	18.68
0.1275	36.28		0.1275	65.76		0.1275	13.54		0.1275	18.54
0.1283	36.21		0.1283	65.55		0.1283	13.48		0.1283	18.4
0.1291	36.17		0.1291	65.36		0.1291	13.42		0.1291	18.26
0.1299	36.13		0.1299	65.17		0.1299	13.39		0.1299	18.13
0.1307	36.07		0.1307	64.97		0.1307	13.36		0.1307	18.02
0.1315	35.98		0.1315	64.77		0.1315	13.34		0.1315	17.91
0.1322	35.89		0.1322	64.57		0.1322	13.32		0.1322	17.81
0.133	35.78		0.133	64.36		0.133	13.31		0.133	17.71
0.1338	35.68		0.1338	64.13		0.1338	13.29		0.1338	17.61
0.1346	35.56		0.1346	63.87		0.1346	13.27		0.1346	17.5
0.1354	35.44		0.1354	63.59		0.1354	13.24		0.1354	17.38
0.1362	35.32		0.1362	63.3		0.1362	13.19		0.1362	17.25
0.137	35.21		0.137	63.01		0.137	13.13		0.137	17.11
0.1378	35.1		0.1378	62.74		0.1378	13.06		0.1378	16.95
0.1386	35.02		0.1386	62.48		0.1386	12.99		0.1386	16.79
0.1394	34.95		0.1394	62.23		0.1394	12.91		0.1394	16.63
0.1402	34.86		0.1402	61.99		0.1402	12.84		0.1402	16.47
0.141	34.77		0.141	61.76		0.141	12.79		0.141	16.3
0.1418	34.67		0.1418	61.53		0.1418	12.74		0.1418	16.13
0.1426	34.58		0.1426	61.31		0.1426	12.71		0.1426	15.98
0.1434	34.5		0.1434	61.1		0.1434	12.67		0.1434	15.83
0.1442	34.4		0.1442	60.91		0.1442	12.65		0.1442	15.68
0.145	34.31		0.145	60.73		0.145	12.64		0.145	15.54
0.1458	34.21		0.1458	60.55		0.1458	12.63		0.1458	15.41
0.1466	34.12		0.1466	60.38		0.1466	12.63		0.1466	15.29
0.1474	34.03		0.1474	60.21		0.1474	12.63		0.1474	15.18
0.1482	33.93		0.1482	60.04		0.1482	12.63		0.1482	15.07
0.149	33.84		0.149	59.88		0.149	12.63		0.149	14.98
0.1498	33.73		0.1498	59.74		0.1498	12.61		0.1498	14.9
0.1506	33.62		0.1506	59.61		0.1506	12.58		0.1506	14.82
0.1514	33.52		0.1514	59.49		0.1514	12.54		0.1514	14.72
0.1522	33.41		0.1522	59.36		0.1522	12.5		0.1522	14.62
0.153	33.31		0.153	59.21		0.153	12.47		0.153	14.53
0.1538	33.21		0.1538	59.06		0.1538	12.45		0.1538	14.44
0.1546	33.11		0.1546	58.91		0.1546	12.44		0.1546	14.35
0.1554	33.01		0.1554	58.74		0.1554	12.42		0.1554	14.26
0.1562	32.91		0.1562	58.55		0.1562	12.38		0.1562	14.19
0.1569	32.82		0.1569	58.33		0.1569	12.36		0.1569	14.15
0.1577	32.73		0.1577	58.09		0.1577	12.34		0.1577	14.15
0.1585	32.65		0.1585	57.82		0.1585	12.33		0.1585	14.18
0.1593	32.56		0.1593	57.54		0.1593	12.33		0.1593	14.25
0.1601	32.46		0.1601	57.27		0.1601	12.35		0.1601	14.34
0.1609	32.33		0.1609	57.01		0.1609	12.37		0.1609	14.44
0.1617	32.21		0.1617	56.77		0.1617	12.37		0.1617	14.55
0.1625	32.1		0.1625	56.54		0.1625	12.36		0.1625	14.66
0.1633	32		0.1633	56.33		0.1633	12.34		0.1633	14.75
0.1641	31.91		0.1641	56.13		0.1641	12.32		0.1641	14.83
0.1649	31.84		0.1649	55.93		0.1649	12.31		0.1649	14.9
0.1657	31.79		0.1657	55.76		0.1657	12.3		0.1657	14.96
0.1665	31.77		0.1665	55.63		0.1665	12.3		0.1665	15.01
0.1673	31.74		0.1673	55.53		0.1673	12.3		0.1673	15.07
0.1681	31.7		0.1681	55.46		0.1681	12.29		0.1681	15.14
0.1689	31.64		0.1689	55.41		0.1689	12.27		0.1689	15.21
0.1697	31.58		0.1697	55.37		0.1697	12.26		0.1697	15.3
0.1705	31.5		0.1705	55.34		0.1705	12.25		0.1705	15.38
0.1713	31.43		0.1713	55.31		0.1713	12.24		0.1713	15.44
0.1721	31.35		0.1721	55.28		0.1721	12.23		0.1721	15.49
0.1729	31.27		0.1729	55.26		0.1729	12.22		0.1729	15.55
0.1737	31.2		0.1737	55.25		0.1737	12.21		0.1737	15.61
0.1745	31.13		0.1745	55.25		0.1745	12.19		0.1745	15.66
0.1753	31.06		0.1753	55.26		0.1753	12.17		0.1753	15.72
0.1761	30.99		0.1761	55.26		0.1761	12.14		0.1761	15.76
0.1769	30.92		0.1769	55.26		0.1769	12.11		0.1769	15.78
0.1777	30.87		0.1777	55.25		0.1777	12.08		0.1777	15.78
0.1785	30.82		0.1785	55.24		0.1785	12.04		0.1785	15.75
0.1793	30.79		0.1793	55.22		0.1793	11.99		0.1793	15.73
0.1801	30.77		0.1801	55.18		0.1801	11.94		0.1801	15.71
0.1808	30.77		0.1808	55.13		0.1808	11.88		0.1808	15.68
0.1816	30.79		0.1816	55.06		0.1816	11.82		0.1816	15.65
0.1824	30.8		0.1824	54.98		0.1824	11.76		0.1824	15.63
0.1832	30.82		0.1832	54.9		0.1832	11.71		0.1832	15.62
0.184	30.85		0.184	54.83		0.184	11.66		0.184	15.62
0.1848	30.87		0.1848	54.78		0.1848	11.61		0.1848	15.64
0.1856	30.89		0.1856	54.77		0.1856	11.56		0.1856	15.68
0.1864	30.91		0.1864	54.78		0.1864	11.52		0.1864	15.72
0.1872	30.92		0.1872	54.8		0.1872	11.49		0.1872	15.76
0.188	30.93		0.188	54.84		0.188	11.46		0.188	15.81
0.1888	30.94		0.1888	54.91		0.1888	11.43		0.1888	15.86
0.1896	30.95		0.1896	55.01		0.1896	11.4		0.1896	15.92
0.1904	30.94		0.1904	55.13		0.1904	11.36		0.1904	15.97
0.1912	30.92		0.1912	55.27		0.1912	11.32		0.1912	16
0.192	30.9		0.192	55.43		0.192	11.28		0.192	16
0.1928	30.89		0.1928	55.61		0.1928	11.24		0.1928	16
0.1936	30.87		0.1936	55.79		0.1936	11.21		0.1936	16
0.1944	30.87		0.1944	55.96		0.1944	11.17		0.1944	16
0.1952	31.01		0.1952	56.13		0.1952	11.12		0.1952	16.01
0.196	31.28		0.196	56.29		0.196	11.07		0.196	16.02
0.1968	31.61		0.1968	56.44		0.1968	11.03		0.1968	16.02
0.1976	31.84		0.1976	56.6		0.1976	10.99		0.1976	16.02
0.1984	31.97		0.1984	56.77		0.1984	10.94		0.1984	16.03
0.1992	32.18		0.1992	56.95		0.1992	10.89		0.1992	16.06
0.2	32.39		0.2	57.14		0.2	10.85		0.2	16.11
0.2008	32.62		0.2008	57.34		0.2008	10.82		0.2008	16.18
0.2016	32.78		0.2016	57.54		0.2016	10.81		0.2016	16.25
0.2024	32.88		0.2024	57.75		0.2024	10.81		0.2024	16.31
0.2032	33.05		0.2032	57.96		0.2032	10.8		0.2032	16.36
0.204	33.22		0.204	58.19		0.204	10.79		0.204	16.42
0.2047	33.4		0.2047	58.46		0.2047	10.77		0.2047	16.49
0.2055	33.53		0.2055	58.78		0.2055	10.76		0.2055	16.58
0.2063	33.59		0.2063	59.13		0.2063	10.75		0.2063	16.68
0.2071	33.63		0.2071	59.51		0.2071	10.75		0.2071	16.78
0.2079	33.67		0.2079	59.9		0.2079	10.75		0.2079	16.87
0.2087	33.69		0.2087	60.3		0.2087	10.75		0.2087	16.95
0.2095	33.7		0.2095	60.7		0.2095	10.74		0.2095	17.03
0.2103	33.73		0.2103	61.09		0.2103	10.73		0.2103	17.13
0.2111	33.78		0.2111	61.46		0.2111	10.71		0.2111	17.24
0.2119	33.84		0.2119	61.82		0.2119	10.69		0.2119	17.36
0.2127	33.91		0.2127	62.16		0.2127	10.66		0.2127	17.5
0.2135	33.98		0.2135	62.49		0.2135	10.64		0.2135	17.66
0.2143	34.05		0.2143	62.83		0.2143	10.62		0.2143	17.83
0.2151	34.11		0.2151	63.17		0.2151	10.6		0.2151	17.99
0.2159	34.17		0.2159	63.5		0.2159	10.59		0.2159	18.14
0.2167	34.22		0.2167	63.81		0.2167	10.58		0.2167	18.31
0.2175	34.29		0.2175	64.08		0.2175	10.57		0.2175	18.52
0.2183	34.34		0.2183	64.33		0.2183	10.55		0.2183	18.74
0.2191	34.42		0.2191	64.54		0.2191	10.54		0.2191	18.97
0.2199	34.55		0.2199	64.71		0.2199	10.53		0.2199	19.21
0.2207	34.71		0.2207	64.84		0.2207	10.5		0.2207	19.45
0.2215	34.91		0.2215	64.93		0.2215	10.47		0.2215	19.7
0.2223	35.1		0.2223	65		0.2223	10.44		0.2223	19.95
0.2231	35.3		0.2231	65.08		0.2231	10.46		0.2231	20.19
0.2239	35.52		0.2239	65.17		0.2239	10.51		0.2239	20.42
0.2247	35.75		0.2247	65.27		0.2247	10.57		0.2247	20.64
0.2255	35.99		0.2255	65.37		0.2255	10.6		0.2255	20.87
0.2263	36.29		0.2263	65.48		0.2263	10.58		0.2263	21.11
0.2271	36.63		0.2271	65.58		0.2271	10.55		0.2271	21.33
0.2279	36.89		0.2279	65.67		0.2279	10.52		0.2279	21.54
0.2286	37.07		0.2286	65.75		0.2286	10.49		0.2286	21.74
0.2294	37.27		0.2294	65.8		0.2294	10.46		0.2294	21.94
0.2302	37.55		0.2302	65.82		0.2302	10.42		0.2302	22.15
0.231	37.87		0.231	65.83		0.231	10.39		0.231	22.39
0.2318	38.16		0.2318	65.83		0.2318	10.36		0.2318	22.65
0.2326	38.48		0.2326	65.84		0.2326	10.32		0.2326	22.9
0.2334	38.75		0.2334	65.86		0.2334	10.28		0.2334	23.14
0.2342	39.04		0.2342	65.89		0.2342	10.23		0.2342	23.36
0.235	39.4		0.235	65.94		0.235	10.19		0.235	23.55
0.2358	39.76		0.2358	66		0.2358	10.16		0.2358	23.72
0.2366	40.03		0.2366	66.08		0.2366	10.12		0.2366	23.87
0.2374	40.2		0.2374	66.17		0.2374	10.09		0.2374	23.98
0.2382	40.35		0.2382	66.3		0.2382	10.05		0.2382	24.06
0.239	40.51		0.239	66.44		0.239	10.01		0.239	24.09
0.2398	40.67		0.2398	66.57		0.2398	9.96		0.2398	24.09
0.2406	40.85		0.2406	66.69		0.2406	9.91		0.2406	24.09
0.2414	41.03		0.2414	66.8		0.2414	9.87		0.2414	24.09
0.2422	41.23		0.2422	66.9		0.2422	9.84		0.2422	24.09
0.243	41.42		0.243	66.98		0.243	9.82		0.243	24.12
0.2438	41.6		0.2438	67.06		0.2438	9.8		0.2438	24.15
0.2446	41.76		0.2446	67.11		0.2446	9.77		0.2446	24.18
0.2454	41.9		0.2454	67.13		0.2454	9.74		0.2454	24.21
0.2462	42.02		0.2462	67.12		0.2462	9.7		0.2462	24.24
0.247	42.17		0.247	67.09		0.247	9.66		0.247	24.27
0.2478	42.33		0.2478	67.05		0.2478	9.63		0.2478	24.31
0.2486	42.5		0.2486	67.01		0.2486	9.6		0.2486	24.36
0.2494	42.66		0.2494	66.98		0.2494	9.57		0.2494	24.39
0.2502	42.82		0.2502	66.97		0.2502	9.55		0.2502	24.43
0.251	42.99		0.251	66.99		0.251	9.53		0.251	24.48
0.2518	43.17		0.2518	67.03		0.2518	9.52		0.2518	24.53
0.2525	43.38		0.2525	67.09		0.2525	9.51		0.2525	24.58
0.2533	43.58		0.2533	67.17		0.2533	9.49		0.2533	24.63
0.2541	43.79		0.2541	67.26		0.2541	9.48		0.2541	24.69
0.2549	44		0.2549	67.37		0.2549	9.47		0.2549	24.73
0.2557	44.21		0.2557	67.5		0.2557	9.46		0.2557	24.78
0.2565	44.41		0.2565	67.63		0.2565	9.45		0.2565	24.84
0.2573	44.63		0.2573	67.77		0.2573	9.44		0.2573	24.94
0.2581	44.85		0.2581	67.93		0.2581	9.44		0.2581	25.07
0.2589	45.06		0.2589	68.11		0.2589	9.44		0.2589	25.2
0.2597	45.27		0.2597	68.31		0.2597	9.43		0.2597	25.35
0.2605	45.48		0.2605	68.52		0.2605	9.43		0.2605	25.51
0.2613	45.68		0.2613	68.74		0.2613	9.43		0.2613	25.64
0.2621	45.88		0.2621	68.95		0.2621	9.43		0.2621	25.76
0.2629	46.06		0.2629	69.14		0.2629	9.43		0.2629	25.86
0.2637	46.25		0.2637	69.31		0.2637	9.44		0.2637	25.96
0.2645	46.45		0.2645	69.46		0.2645	9.45		0.2645	26.05
0.2653	46.65		0.2653	69.6		0.2653	9.47		0.2653	26.13
0.2661	46.86		0.2661	69.74		0.2661	9.49		0.2661	26.22
0.2669	47.07		0.2669	69.87		0.2669	9.52		0.2669	26.32
0.2677	47.26		0.2677	69.98		0.2677	9.55		0.2677	26.41
0.2685	47.47		0.2685	70.06		0.2685	9.58		0.2685	26.51
0.2693	47.68		0.2693	70.1		0.2693	9.61		0.2693	26.61
0.2701	47.92		0.2701	70.11		0.2701	9.63		0.2701	26.72
0.2709	48.19		0.2709	70.09		0.2709	9.64		0.2709	26.85
0.2717	48.45		0.2717	70.06		0.2717	9.65		0.2717	27.02
0.2725	48.71		0.2725	70.02		0.2725	9.66		0.2725	27.21
0.2733	48.98		0.2733	69.97		0.2733	9.67		0.2733	27.4
0.2741	49.24		0.2741	69.93		0.2741	9.68		0.2741	27.6
0.2749	49.36		0.2749	69.89		0.2749	9.7		0.2749	27.78
0.2757	49.37		0.2757	69.86		0.2757	9.72		0.2757	27.95
0.2764	49.33		0.2764	69.85		0.2764	9.74		0.2764	28.12
0.2772	49.36		0.2772	69.84		0.2772	9.75		0.2772	28.29
0.278	49.48		0.278	69.83		0.278	9.76		0.278	28.46
0.2788	49.5		0.2788	69.81		0.2788	9.77		0.2788	28.6
0.2796	49.55		0.2796	69.78		0.2796	9.78		0.2796	28.72
0.2804	49.59		0.2804	69.75		0.2804	9.79		0.2804	28.81
0.2812	49.72		0.2812	69.72		0.2812	9.8		0.2812	28.89
0.282	49.92		0.282	69.69		0.282	9.81		0.282	28.97
0.2828	50.06		0.2828	69.68		0.2828	9.82		0.2828	29.03
0.2836	50.19		0.2836	69.68		0.2836	9.82		0.2836	29.08
0.2844	50.33		0.2844	69.65		0.2844	9.82		0.2844	29.12
0.2852	50.51		0.2852	69.59		0.2852	9.82		0.2852	29.16
0.286	50.77		0.286	69.52		0.286	9.82		0.286	29.19
0.2868	51.04		0.2868	69.43		0.2868	9.82		0.2868	29.23
0.2876	51.3		0.2876	69.34		0.2876	9.82		0.2876	29.29
0.2884	51.54		0.2884	69.23		0.2884	9.82		0.2884	29.35
0.2892	51.79		0.2892	69.1		0.2892	9.82		0.2892	29.41
0.29	52.04		0.29	68.97		0.29	9.82		0.29	29.45
0.2908	52.27		0.2908	68.84		0.2908	9.82		0.2908	29.48
0.2916	52.5		0.2916	68.72		0.2916	9.82		0.2916	29.5
0.2924	52.71		0.2924	68.63		0.2924	9.81		0.2924	29.5
0.2932	52.92		0.2932	68.57		0.2932	9.8		0.2932	29.47
0.294	53.14		0.294	68.52		0.294	9.79		0.294	29.44
0.2948	53.38		0.2948	68.47		0.2948	9.78		0.2948	29.42
0.2956	53.63		0.2956	68.4		0.2956	9.77		0.2956	29.41
0.2964	53.89		0.2964	68.33		0.2964	9.76		0.2964	29.39
0.2972	54.14		0.2972	68.29		0.2972	9.75		0.2972	29.35
0.298	54.37		0.298	68.28		0.298	9.74		0.298	29.29
0.2988	54.55		0.2988	68.32		0.2988	9.74		0.2988	29.21
0.2996	54.7		0.2996	68.41		0.2996	9.73		0.2996	29.12
0.3004	54.83		0.3004	68.54		0.3004	9.73		0.3004	29.02
0.3011	54.92		0.3011	68.69		0.3011	9.73		0.3011	28.93
0.3019	55.02		0.3019	68.84		0.3019	9.73		0.3019	28.84
0.3027	55.13		0.3027	68.96		0.3027	9.7		0.3027	28.8
0.3035	55.22		0.3035	69.06		0.3035	9.63		0.3035	28.79
0.3043	55.29		0.3043	69.14		0.3043	9.55		0.3043	28.8
0.3051	55.34		0.3051	69.22		0.3051	9.5		0.3051	28.8
0.3059	55.32		0.3059	69.28		0.3059	9.49		0.3059	28.76
0.3067	55.26		0.3067	69.34		0.3067	9.49		0.3067	28.72
0.3075	55.31		0.3075	69.4		0.3075	9.49		0.3075	28.68
0.3083	55.45		0.3083	69.45		0.3083	9.48		0.3083	28.64
0.3091	55.59		0.3091	69.52		0.3091	9.47		0.3091	28.63
0.3099	55.65		0.3099	69.63		0.3099	9.46		0.3099	28.64
0.3107	55.67		0.3107	69.76		0.3107	9.45		0.3107	28.63
0.3115	55.72		0.3115	69.93		0.3115	9.44		0.3115	28.59
0.3123	55.73		0.3123	70.1		0.3123	9.43		0.3123	28.54
0.3131	55.77		0.3131	70.27		0.3131	9.42		0.3131	28.47
0.3139	55.77		0.3139	70.44		0.3139	9.41		0.3139	28.41
0.3147	55.7		0.3147	70.58		0.3147	9.4		0.3147	28.36
0.3155	55.63		0.3155	70.69		0.3155	9.39		0.3155	28.3
0.3163	55.64		0.3163	70.78		0.3163	9.39		0.3163	28.25
0.3171	55.75		0.3171	70.85		0.3171	9.39		0.3171	28.2
0.3179	55.86		0.3179	70.9		0.3179	9.39		0.3179	28.16
0.3187	55.94		0.3187	70.95		0.3187	9.39		0.3187	28.13
0.3195	55.99		0.3195	71.02		0.3195	9.38		0.3195	28.1
0.3203	56.02		0.3203	71.11		0.3203	9.37		0.3203	28.05
0.3211	56.05		0.3211	71.21		0.3211	9.36		0.3211	28.01
0.3219	56.08		0.3219	71.32		0.3219	9.35		0.3219	27.97
0.3227	56.1		0.3227	71.43		0.3227	9.34		0.3227	27.95
0.3235	56.13		0.3235	71.53		0.3235	9.33		0.3235	27.95
0.3243	56.14		0.3243	71.64		0.3243	9.33		0.3243	27.97
0.325	56.14		0.325	71.77		0.325	9.33		0.325	28.01
0.3258	56.13		0.3258	71.91		0.3258	9.33		0.3258	28.06
0.3266	56.1		0.3266	72.07		0.3266	9.34		0.3266	28.1
0.3274	56.08		0.3274	72.23		0.3274	9.34		0.3274	28.13
0.3282	56.07		0.3282	72.37		0.3282	9.35		0.3282	28.15
0.329	56.06		0.329	72.5		0.329	9.35		0.329	28.18
0.3298	56.06		0.3298	72.6		0.3298	9.35		0.3298	28.2
0.3306	56.05		0.3306	72.68		0.3306	9.35		0.3306	28.23
0.3314	56.03		0.3314	72.76		0.3314	9.34		0.3314	28.27
0.3322	56		0.3322	72.85		0.3322	9.33		0.3322	28.3
0.333	56		0.333	72.95		0.333	9.34		0.333	28.31
0.3338	55.98		0.3338	73.07		0.3338	9.35		0.3338	28.3
0.3346	55.98		0.3346	73.19		0.3346	9.36		0.3346	28.29
0.3354	55.99		0.3354	73.31		0.3354	9.37		0.3354	28.28
0.3362	56.03		0.3362	73.43		0.3362	9.39		0.3362	28.28
0.337	56.04		0.337	73.54		0.337	9.41		0.337	28.27
0.3378	56.05		0.3378	73.61		0.3378	9.43		0.3378	28.25
0.3386	56.04		0.3386	73.65		0.3386	9.45		0.3386	28.24
0.3394	55.99		0.3394	73.66		0.3394	9.48		0.3394	28.24
0.3402	55.93		0.3402	73.67		0.3402	9.49		0.3402	28.24
0.341	55.88		0.341	73.68		0.341	9.5		0.341	28.29
0.3418	55.85		0.3418	73.72		0.3418	9.51		0.3418	28.35
0.3426	55.86		0.3426	73.78		0.3426	9.52		0.3426	28.42
0.3434	55.86		0.3434	73.84		0.3434	9.52		0.3434	28.47
0.3442	55.85		0.3442	73.9		0.3442	9.52		0.3442	28.51
0.345	55.82		0.345	73.95		0.345	9.51		0.345	28.53
0.3458	55.78		0.3458	73.99		0.3458	9.5		0.3458	28.54
0.3466	55.73		0.3466	74.03		0.3466	9.48		0.3466	28.53
0.3474	55.69		0.3474	74.07		0.3474	9.46		0.3474	28.49
0.3482	55.63		0.3482	74.11		0.3482	9.44		0.3482	28.44
0.3489	55.57		0.3489	74.16		0.3489	9.42		0.3489	28.39
0.3497	55.49		0.3497	74.23		0.3497	9.41		0.3497	28.34
0.3505	55.39		0.3505	74.31		0.3505	9.4		0.3505	28.28
0.3513	55.31		0.3513	74.38		0.3513	9.39		0.3513	28.19
0.3521	55.22		0.3521	74.43		0.3521	9.39		0.3521	28.08
0.3529	55.12		0.3529	74.46		0.3529	9.39		0.3529	27.95
0.3537	55.01		0.3537	74.48		0.3537	9.38		0.3537	27.79
0.3545	54.9		0.3545	74.5		0.3545	9.38		0.3545	27.63
0.3553	54.77		0.3553	74.54		0.3553	9.37		0.3553	27.48
0.3561	54.64		0.3561	74.6		0.3561	9.36		0.3561	27.34
0.3569	54.52		0.3569	74.67		0.3569	9.36		0.3569	27.2
0.3577	54.39		0.3577	74.74		0.3577	9.35		0.3577	27.05
0.3585	54.27		0.3585	74.81		0.3585	9.34		0.3585	26.91
0.3593	54.13		0.3593	74.89		0.3593	9.33		0.3593	26.78
0.3601	53.97		0.3601	74.97		0.3601	9.32		0.3601	26.66
0.3609	53.79		0.3609	75.06		0.3609	9.31		0.3609	26.55
0.3617	53.58		0.3617	75.14		0.3617	9.3		0.3617	26.44
0.3625	53.36		0.3625	75.19		0.3625	9.29		0.3625	26.36
0.3633	53.13		0.3633	75.22		0.3633	9.29		0.3633	26.28
0.3641	52.9		0.3641	75.27		0.3641	9.3		0.3641	26.2
0.3649	52.68		0.3649	75.32		0.3649	9.31		0.3649	26.1
0.3657	52.46		0.3657	75.38		0.3657	9.32		0.3657	26.01
0.3665	52.24		0.3665	75.46		0.3665	9.32		0.3665	25.92
0.3673	52.02		0.3673	75.55		0.3673	9.32		0.3673	25.84
0.3681	51.82		0.3681	75.65		0.3681	9.32		0.3681	25.79
0.3689	51.62		0.3689	75.76		0.3689	9.32		0.3689	25.75
0.3697	51.42		0.3697	75.87		0.3697	9.32		0.3697	25.71
0.3705	51.23		0.3705	75.98		0.3705	9.32		0.3705	25.66
0.3713	51.05		0.3713	76.1		0.3713	9.32		0.3713	25.59
0.3721	50.9		0.3721	76.21		0.3721	9.34		0.3721	25.5
0.3728	50.77		0.3728	76.3		0.3728	9.36		0.3728	25.41
0.3736	50.65		0.3736	76.38		0.3736	9.39		0.3736	25.32
0.3744	50.52		0.3744	76.46		0.3744	9.41		0.3744	25.22
0.3752	50.38		0.3752	76.56		0.3752	9.43		0.3752	25.12
0.376	50.24		0.376	76.66		0.376	9.45		0.376	25.01
0.3768	50.1		0.3768	76.76		0.3768	9.47		0.3768	24.89
0.3776	49.98		0.3776	76.85		0.3776	9.48		0.3776	24.78
0.3784	49.86		0.3784	76.91		0.3784	9.48		0.3784	24.68
0.3792	49.74		0.3792	76.95		0.3792	9.5		0.3792	24.58
0.38	49.59		0.38	76.99		0.38	9.52		0.38	24.5
0.3808	49.43		0.3808	77.05		0.3808	9.53		0.3808	24.4
0.3816	49.26		0.3816	77.13		0.3816	9.54		0.3816	24.29
0.3824	49.07		0.3824	77.22		0.3824	9.54		0.3824	24.14
0.3832	48.9		0.3832	77.3		0.3832	9.55		0.3832	23.97
0.384	48.75		0.384	77.37		0.384	9.55		0.384	23.78
0.3848	48.62		0.3848	77.41		0.3848	9.56		0.3848	23.59
0.3856	48.51		0.3856	77.44		0.3856	9.57		0.3856	23.43
0.3864	48.4		0.3864	77.46		0.3864	9.58		0.3864	23.29
0.3872	48.27		0.3872	77.49		0.3872	9.59		0.3872	23.16
0.388	48.12		0.388	77.53		0.388	9.61		0.388	23.03
0.3888	47.96		0.3888	77.57		0.3888	9.63		0.3888	22.86
0.3896	47.79		0.3896	77.58		0.3896	9.64		0.3896	22.65
0.3904	47.6		0.3904	77.57		0.3904	9.64		0.3904	22.44
0.3912	47.41		0.3912	77.52		0.3912	9.64		0.3912	22.24
0.392	47.23		0.392	77.44		0.392	9.64		0.392	22.06
0.3928	47.07		0.3928	77.34		0.3928	9.64		0.3928	21.91
0.3936	46.92		0.3936	77.21		0.3936	9.64		0.3936	21.77
0.3944	46.76		0.3944	77.09		0.3944	9.64		0.3944	21.65
0.3952	46.59		0.3952	76.99		0.3952	9.64		0.3952	21.55
0.396	46.43		0.396	76.9		0.396	9.63		0.396	21.45
0.3967	46.27		0.3967	76.83		0.3967	9.62		0.3967	21.36
0.3975	46.13		0.3975	76.75		0.3975	9.61		0.3975	21.27
0.3983	46.01		0.3983	76.67		0.3983	9.6		0.3983	21.2
0.3991	45.91		0.3991	76.57		0.3991	9.6		0.3991	21.14
0.3999	45.81		0.3999	76.45		0.3999	9.6		0.3999	21.11
0.4007	45.7		0.4007	76.31		0.4007	9.6		0.4007	21.07
0.4015	45.57		0.4015	76.16		0.4015	9.6		0.4015	21.02
0.4023	45.44		0.4023	76.01		0.4023	9.6		0.4023	20.94
0.4031	45.32		0.4031	75.86		0.4031	9.6		0.4031	20.86
0.4039	45.19		0.4039	75.72		0.4039	9.6		0.4039	20.77
0.4047	45.07		0.4047	75.56		0.4047	9.6		0.4047	20.68
0.4055	44.96		0.4055	75.39		0.4055	9.6		0.4055	20.59
0.4063	44.87		0.4063	75.19		0.4063	9.59		0.4063	20.52
0.4071	44.77		0.4071	74.98		0.4071	9.58		0.4071	20.47
0.4079	44.68		0.4079	74.79		0.4079	9.57		0.4079	20.43
0.4087	44.62		0.4087	74.61		0.4087	9.57		0.4087	20.4
0.4095	44.56		0.4095	74.46		0.4095	9.57		0.4095	20.37
0.4103	44.52		0.4103	74.31		0.4103	9.57		0.4103	20.34
0.4111	44.49		0.4111	74.14		0.4111	9.57		0.4111	20.3
0.4119	44.44		0.4119	73.93		0.4119	9.57		0.4119	20.25
0.4127	44.36		0.4127	73.68		0.4127	9.56		0.4127	20.22
0.4135	44.28		0.4135	73.4		0.4135	9.55		0.4135	20.2
0.4143	44.18		0.4143	73.1		0.4143	9.54		0.4143	20.18
0.4151	44.07		0.4151	72.78		0.4151	9.53		0.4151	20.17
0.4159	43.95		0.4159	72.45		0.4159	9.51		0.4159	20.16
0.4167	43.84		0.4167	72.12		0.4167	9.5		0.4167	20.15
0.4175	43.74		0.4175	71.81		0.4175	9.49		0.4175	20.15
0.4183	43.66		0.4183	71.53		0.4183	9.48		0.4183	20.16
0.4191	43.6		0.4191	71.3		0.4191	9.47		0.4191	20.15
0.4199	43.52		0.4199	71.09		0.4199	9.47		0.4199	20.13
0.4207	43.43		0.4207	70.89		0.4207	9.47		0.4207	20.07
0.4214	43.31		0.4214	70.67		0.4214	9.47		0.4214	19.99
0.4222	43.17		0.4222	70.43		0.4222	9.47		0.4222	19.91
0.423	43.02		0.423	70.19		0.423	9.47		0.423	19.86
0.4238	42.88		0.4238	69.96		0.4238	9.47		0.4238	19.81
0.4246	42.76		0.4246	69.76		0.4246	9.47		0.4246	19.78
0.4254	42.66		0.4254	69.59		0.4254	9.47		0.4254	19.75
0.4262	42.59		0.4262	69.45		0.4262	9.47		0.4262	19.7
0.427	42.53		0.427	69.34		0.427	9.47		0.427	19.67
0.4278	42.47		0.4278	69.24		0.4278	9.47		0.4278	19.66
0.4286	42.41		0.4286	69.13		0.4286	9.47		0.4286	19.65
0.4294	42.35		0.4294	69		0.4294	9.48		0.4294	19.62
0.4302	42.3		0.4302	68.86		0.4302	9.51		0.4302	19.61
0.431	42.24		0.431	68.71		0.431	9.53		0.431	19.61
0.4318	42.17		0.4318	68.56		0.4318	9.53		0.4318	19.61
0.4326	42.11		0.4326	68.41		0.4326	9.53		0.4326	19.63
0.4334	42.04		0.4334	68.26		0.4334	9.54		0.4334	19.67
0.4342	41.96		0.4342	68.13		0.4342	9.54		0.4342	19.73
0.435	41.88		0.435	67.99		0.435	9.54		0.435	19.78
0.4358	41.78		0.4358	67.83		0.4358	9.54		0.4358	19.81
0.4366	41.69		0.4366	67.67		0.4366	9.54		0.4366	19.82
0.4374	41.61		0.4374	67.52		0.4374	9.55		0.4374	19.82
0.4382	41.53		0.4382	67.36		0.4382	9.56		0.4382	19.81
0.439	41.45		0.439	67.2		0.439	9.57		0.439	19.8
0.4398	41.37		0.4398	67.04		0.4398	9.58		0.4398	19.79
0.4406	41.3		0.4406	66.87		0.4406	9.59		0.4406	19.79
0.4414	41.25		0.4414	66.71		0.4414	9.6		0.4414	19.79
0.4422	41.19		0.4422	66.57		0.4422	9.6		0.4422	19.76
0.443	41.14		0.443	66.43		0.443	9.6		0.443	19.71
0.4438	41.08		0.4438	66.28		0.4438	9.59		0.4438	19.66
0.4446	41.02		0.4446	66.13		0.4446	9.58		0.4446	19.61
0.4453	40.94		0.4453	65.97		0.4453	9.58		0.4453	19.55
0.4461	40.86		0.4461	65.79		0.4461	9.59		0.4461	19.48
0.4469	40.79		0.4469	65.59		0.4469	9.6		0.4469	19.39
0.4477	40.72		0.4477	65.39		0.4477	9.61		0.4477	19.29
0.4485	40.64		0.4485	65.21		0.4485	9.62		0.4485	19.18
0.4493	40.56		0.4493	65.05		0.4493	9.63		0.4493	19.08
0.4501	40.48		0.4501	64.91		0.4501	9.64		0.4501	18.99
0.4509	40.4		0.4509	64.78		0.4509	9.65		0.4509	18.93
0.4517	40.3		0.4517	64.68		0.4517	9.65		0.4517	18.9
0.4525	40.17		0.4525	64.61		0.4525	9.65		0.4525	18.88
0.4533	40.03		0.4533	64.58		0.4533	9.64		0.4533	18.86
0.4541	39.9		0.4541	64.58		0.4541	9.65		0.4541	18.87
0.4549	39.76		0.4549	64.6		0.4549	9.66		0.4549	18.9
0.4557	39.61		0.4557	64.63		0.4557	9.67		0.4557	18.97
0.4565	39.44		0.4565	64.66		0.4565	9.68		0.4565	19.08
0.4573	39.26		0.4573	64.66		0.4573	9.7		0.4573	19.2
0.4581	39.1		0.4581	64.65		0.4581	9.72		0.4581	19.32
0.4589	38.94		0.4589	64.62		0.4589	9.73		0.4589	19.43
0.4597	38.8		0.4597	64.56		0.4597	9.73		0.4597	19.52
0.4605	38.67		0.4605	64.47		0.4605	9.74		0.4605	19.59
0.4613	38.54		0.4613	64.36		0.4613	9.75		0.4613	19.65
0.4621	38.42		0.4621	64.25		0.4621	9.76		0.4621	19.7
0.4629	38.3		0.4629	64.15		0.4629	9.77		0.4629	19.74
0.4637	38.17		0.4637	64.06		0.4637	9.79		0.4637	19.79
0.4645	38.02		0.4645	63.99		0.4645	9.8		0.4645	19.84
0.4653	37.86		0.4653	63.93		0.4653	9.81		0.4653	19.89
0.4661	37.7		0.4661	63.89		0.4661	9.82		0.4661	19.94
0.4669	37.54		0.4669	63.84		0.4669	9.82		0.4669	19.99
0.4677	37.38		0.4677	63.79		0.4677	9.82		0.4677	20.07
0.4685	37.23		0.4685	63.74		0.4685	9.82		0.4685	20.17
0.4692	37.1		0.4692	63.71		0.4692	9.83		0.4692	20.3
0.47	36.99		0.47	63.68		0.47	9.84		0.47	20.46
0.4708	36.88		0.4708	63.68		0.4708	9.85		0.4708	20.66
0.4716	36.77		0.4716	63.72		0.4716	9.86		0.4716	20.87
0.4724	36.67		0.4724	63.78		0.4724	9.87		0.4724	21.09
0.4732	36.56		0.4732	63.88		0.4732	9.88		0.4732	21.3
0.474	36.45		0.474	63.98		0.474	9.89		0.474	21.5
0.4748	36.35		0.4748	64.07		0.4748	9.9		0.4748	21.69
0.4756	36.25		0.4756	64.16		0.4756	9.91		0.4756	21.87
0.4764	36.14		0.4764	64.26		0.4764	9.91		0.4764	22.04
0.4772	36.02		0.4772	64.38		0.4772	9.91		0.4772	22.2
0.478	35.9		0.478	64.5		0.478	9.91		0.478	22.34
0.4788	35.78		0.4788	64.62		0.4788	9.91		0.4788	22.47
0.4796	35.67		0.4796	64.73		0.4796	9.91		0.4796	22.56
0.4804	35.58		0.4804	64.85		0.4804	9.91		0.4804	22.63
0.4812	35.5		0.4812	64.96		0.4812	9.91		0.4812	22.72
0.482	35.43		0.482	65.07		0.482	9.91		0.482	22.8
0.4828	35.35		0.4828	65.17		0.4828	9.92		0.4828	22.87
0.4836	35.28		0.4836	65.28		0.4836	10		0.4836	22.95
0.4844	35.21		0.4844	65.4		0.4844	10.19		0.4844	23.03
0.4852	35.14		0.4852	65.53		0.4852	10.56		0.4852	23.12
0.486	35.06		0.486	65.68		0.486	11.12		0.486	23.2
0.4868	34.99		0.4868	65.85		0.4868	11.81		0.4868	23.24
0.4876	34.92		0.4876	66.02		0.4876	12.55		0.4876	23.29
0.4884	34.83		0.4884	66.21		0.4884	13.29		0.4884	23.33
0.4892	34.73		0.4892	66.4		0.4892	14.07		0.4892	23.37
0.49	34.6		0.49	66.6		0.49	14.86		0.49	23.39
0.4908	34.47		0.4908	66.82		0.4908	15.7		0.4908	23.37
0.4916	34.34		0.4916	67.05		0.4916	16.63		0.4916	23.33
0.4924	34.22		0.4924	67.29		0.4924	17.59		0.4924	23.25
0.4931	34.11		0.4931	67.54		0.4931	18.49		0.4931	23.15
0.4939	34		0.4939	67.8		0.4939	19.21		0.4939	23.04
0.4947	33.89		0.4947	68.08		0.4947	19.81		0.4947	22.92
0.4955	33.76		0.4955	68.37		0.4955	20.36		0.4955	22.79
0.4963	33.62		0.4963	68.68		0.4963	20.77		0.4963	22.65
0.4971	33.47		0.4971	69.01		0.4971	21.04		0.4971	22.5
0.4979	33.33		0.4979	69.35		0.4979	21.14		0.4979	22.34
0.4987	33.19		0.4987	69.68		0.4987	21.15		0.4987	22.19
0.4995	33.07		0.4995	70		0.4995	21.15		0.4995	22.05
0.5003	32.94		0.5003	70.31		0.5003	21.15		0.5003	21.93
0.5011	32.83		0.5011	70.62		0.5011	21.15		0.5011	21.83
0.5019	32.71		0.5019	70.93		0.5019	21.15		0.5019	21.74
0.5027	32.6		0.5027	71.22		0.5027	21.15		0.5027	21.62
0.5035	32.5		0.5035	71.48		0.5035	21.14		0.5035	21.5
0.5043	32.39		0.5043	71.7		0.5043	21.13		0.5043	21.36
0.5051	32.28		0.5051	71.88		0.5051	21.12		0.5051	21.22
0.5059	32.16		0.5059	72.03		0.5059	21.11		0.5059	21.1
0.5067	32.03		0.5067	72.15		0.5067	21.11		0.5067	20.99
0.5075	31.92		0.5075	72.27		0.5075	21.11		0.5075	20.87
0.5083	31.82		0.5083	72.41		0.5083	21.11		0.5083	20.75
0.5091	31.73		0.5091	72.58		0.5091	21.1		0.5091	20.65
0.5099	31.64		0.5099	72.78		0.5099	21.08		0.5099	20.54
0.5107	31.53		0.5107	73		0.5107	21.07		0.5107	20.45
0.5115	31.42		0.5115	73.22		0.5115	21.07		0.5115	20.39
0.5123	31.31		0.5123	73.44		0.5123	21.07		0.5123	20.33
0.5131	31.22		0.5131	73.64		0.5131	21.07		0.5131	20.28
0.5139	31.13		0.5139	73.81		0.5139	21.07		0.5139	20.22
0.5147	31.05		0.5147	73.96		0.5147	21.07		0.5147	20.18
0.5155	31		0.5155	74.1		0.5155	21.07		0.5155	20.15
0.5163	30.95		0.5163	74.22		0.5163	21.07		0.5163	20.13
0.517	30.9		0.517	74.31		0.517	21.08		0.517	20.11
0.5178	30.86		0.5178	74.41		0.5178	21.08		0.5178	20.1
0.5186	30.82		0.5186	74.51		0.5186	21.08		0.5186	20.09
0.5194	30.79		0.5194	74.6		0.5194	21.08		0.5194	20.1
0.5202	30.76		0.5202	74.67		0.5202	21.08		0.5202	20.12
0.521	30.74		0.521	74.72		0.521	21.08		0.521	20.15
0.5218	30.72		0.5218	74.74		0.5218	21.09		0.5218	20.22
0.5226	30.71		0.5226	74.76		0.5226	21.1		0.5226	20.3
0.5234	30.7		0.5234	74.78		0.5234	21.11		0.5234	20.37
0.5242	30.68		0.5242	74.79		0.5242	21.12		0.5242	20.44
0.525	30.67		0.525	74.81		0.525	21.12		0.525	20.51
0.5258	30.65		0.5258	74.83		0.5258	21.12		0.5258	20.59
0.5266	30.62		0.5266	74.85		0.5266	21.12		0.5266	20.68
0.5274	30.58		0.5274	74.87		0.5274	21.12		0.5274	20.77
0.5282	30.54		0.5282	74.86		0.5282	21.12		0.5282	20.87
0.529	30.5		0.529	74.84		0.529	21.12		0.529	20.96
0.5298	30.46		0.5298	74.81		0.5298	21.12		0.5298	21.04
0.5306	30.41		0.5306	74.76		0.5306	21.12		0.5306	21.1
0.5314	30.36		0.5314	74.7		0.5314	21.12		0.5314	21.14
0.5322	30.33		0.5322	74.63		0.5322	21.11		0.5322	21.18
0.533	30.3		0.533	74.54		0.533	21.1		0.533	21.23
0.5338	30.25		0.5338	74.44		0.5338	21.08		0.5338	21.26
0.5346	30.21		0.5346	74.35		0.5346	21.06		0.5346	21.26
0.5354	30.18		0.5354	74.29		0.5354	21.04		0.5354	21.23
0.5362	30.17		0.5362	74.24		0.5362	21.03		0.5362	21.14
0.537	30.16		0.537	74.22		0.537	21.02		0.537	21.03
0.5378	30.15		0.5378	74.21		0.5378	21.01		0.5378	20.91
0.5386	30.14		0.5386	74.21		0.5386	21		0.5386	20.79
0.5394	30.14		0.5394	74.21		0.5394	20.99		0.5394	20.67
0.5402	30.14		0.5402	74.21		0.5402	20.98		0.5402	20.58
0.5409	30.14		0.5409	74.19		0.5409	20.97		0.5409	20.49
0.5417	30.13		0.5417	74.13		0.5417	20.96		0.5417	20.42
0.5425	30.12		0.5425	74.03		0.5425	20.95		0.5425	20.38
0.5433	30.11		0.5433	73.91		0.5433	20.94		0.5433	20.36
0.5441	30.11		0.5441	73.76		0.5441	20.93		0.5441	20.37
0.5449	30.11		0.5449	73.6		0.5449	20.92		0.5449	20.4
0.5457	30.12		0.5457	73.41		0.5457	20.91		0.5457	20.42
0.5465	30.13		0.5465	73.22		0.5465	20.91		0.5465	20.46
0.5473	30.15		0.5473	73.03		0.5473	20.91		0.5473	20.48
0.5481	30.15		0.5481	72.85		0.5481	20.91		0.5481	20.49
0.5489	30.13		0.5489	72.67		0.5489	20.91		0.5489	20.49
0.5497	30.11		0.5497	72.5		0.5497	20.91		0.5497	20.45
0.5505	30.08		0.5505	72.33		0.5505	20.91		0.5505	20.36
0.5513	30.04		0.5513	72.15		0.5513	20.91		0.5513	20.24
0.5521	29.99		0.5521	71.97		0.5521	20.91		0.5521	20.11
0.5529	29.95		0.5529	71.8		0.5529	20.91		0.5529	19.98
0.5537	29.92		0.5537	71.65		0.5537	20.91		0.5537	19.86
0.5545	29.89		0.5545	71.52		0.5545	20.91		0.5545	19.75
0.5553	29.86		0.5553	71.39		0.5553	20.91		0.5553	19.64
0.5561	29.84		0.5561	71.25		0.5561	20.91		0.5561	19.53
0.5569	29.82		0.5569	71.13		0.5569	20.91		0.5569	19.44
0.5577	29.81		0.5577	71.03		0.5577	20.91		0.5577	19.37
0.5585	29.8		0.5585	70.94		0.5585	20.91		0.5585	19.33
0.5593	29.8		0.5593	70.88		0.5593	20.91		0.5593	19.32
0.5601	29.79		0.5601	70.83		0.5601	20.91		0.5601	19.35
0.5609	29.78		0.5609	70.81		0.5609	20.95		0.5609	19.38
0.5617	29.75		0.5617	70.8		0.5617	20.99		0.5617	19.42
0.5625	29.73		0.5625	70.82		0.5625	20.99		0.5625	19.46
0.5633	29.71		0.5633	70.85		0.5633	20.92		0.5633	19.49
0.5641	29.69		0.5641	70.9		0.5641	20.74		0.5641	19.5
0.5649	29.66		0.5649	70.96		0.5649	20.38		0.5649	19.51
0.5656	29.63		0.5656	71.04		0.5656	19.83		0.5656	19.54
0.5664	29.59		0.5664	71.11		0.5664	19.15		0.5664	19.62
0.5672	29.54		0.5672	71.16		0.5672	18.42		0.5672	19.72
0.568	29.48		0.568	71.18		0.568	17.69		0.568	19.85
0.5688	29.42		0.5688	71.19		0.5688	16.92		0.5688	19.98
0.5696	29.37		0.5696	71.18		0.5696	16.14		0.5696	20.12
0.5704	29.32		0.5704	71.16		0.5704	15.31		0.5704	20.28
0.5712	29.27		0.5712	71.14		0.5712	14.39		0.5712	20.46
0.572	29.22		0.572	71.12		0.572	13.44		0.572	20.66
0.5728	29.17		0.5728	71.09		0.5728	12.55		0.5728	20.86
0.5736	29.12		0.5736	71.06		0.5736	11.84		0.5736	21.08
0.5744	29.07		0.5744	71.02		0.5744	11.25		0.5744	21.33
0.5752	29.03		0.5752	70.99		0.5752	10.71		0.5752	21.6
0.576	29		0.576	70.95		0.576	10.3		0.576	21.87
0.5768	28.97		0.5768	70.89		0.5768	10.03		0.5768	22.12
0.5776	28.93		0.5776	70.81		0.5776	9.93		0.5776	22.32
0.5784	28.89		0.5784	70.71		0.5784	9.93		0.5784	22.49
0.5792	28.85		0.5792	70.59		0.5792	9.94		0.5792	22.65
0.58	28.81		0.58	70.45		0.58	9.94		0.58	22.81
0.5808	28.76		0.5808	70.29		0.5808	9.94		0.5808	22.98
0.5816	28.71		0.5816	70.12		0.5816	9.94		0.5816	23.12
0.5824	28.66		0.5824	69.96		0.5824	9.94		0.5824	23.25
0.5832	28.6		0.5832	69.8		0.5832	9.95		0.5832	23.36
0.584	28.55		0.584	69.65		0.584	9.96		0.584	23.48
0.5848	28.49		0.5848	69.51		0.5848	9.97		0.5848	23.64
0.5856	28.44		0.5856	69.37		0.5856	9.98		0.5856	23.84
0.5864	28.39		0.5864	69.24		0.5864	9.97		0.5864	24.06
0.5872	28.33		0.5872	69.13		0.5872	9.96		0.5872	24.28
0.588	28.25		0.588	69.03		0.588	9.95		0.588	24.51
0.5888	28.16		0.5888	68.94		0.5888	9.94		0.5888	24.74
0.5895	28.07		0.5895	68.85		0.5895	9.93		0.5895	24.96
0.5903	28		0.5903	68.76		0.5903	9.92		0.5903	25.17
0.5911	27.94		0.5911	68.69		0.5911	9.91		0.5911	25.34
0.5919	27.88		0.5919	68.63		0.5919	9.91		0.5919	25.5
0.5927	27.82		0.5927	68.57		0.5927	9.91		0.5927	25.63
0.5935	27.76		0.5935	68.51		0.5935	9.91		0.5935	25.74
0.5943	27.7		0.5943	68.47		0.5943	9.91		0.5943	25.81
0.5951	27.65		0.5951	68.44		0.5951	9.9		0.5951	25.87
0.5959	27.61		0.5959	68.4		0.5959	9.9		0.5959	25.92
0.5967	27.58		0.5967	68.37		0.5967	9.89		0.5967	25.98
0.5975	27.55		0.5975	68.33		0.5975	9.89		0.5975	26.05
0.5983	27.52		0.5983	68.28		0.5983	9.89		0.5983	26.13
0.5991	27.49		0.5991	68.24		0.5991	9.89		0.5991	26.22
0.5999	27.46		0.5999	68.24		0.5999	9.89		0.5999	26.32
0.6007	27.42		0.6007	68.27		0.6007	9.88		0.6007	26.44
0.6015	27.39		0.6015	68.33		0.6015	9.87		0.6015	26.56
0.6023	27.35		0.6023	68.4		0.6023	9.86		0.6023	26.71
0.6031	27.31		0.6031	68.47		0.6031	9.85		0.6031	26.88
0.6039	27.27		0.6039	68.57		0.6039	9.84		0.6039	27.05
0.6047	27.24		0.6047	68.66		0.6047	9.84		0.6047	27.22
0.6055	27.23		0.6055	68.75		0.6055	9.84		0.6055	27.37
0.6063	27.21		0.6063	68.83		0.6063	9.84		0.6063	27.5
0.6071	27.2		0.6071	68.88		0.6071	9.84		0.6071	27.63
0.6079	27.19		0.6079	68.94		0.6079	9.84		0.6079	27.74
0.6087	27.17		0.6087	68.98		0.6087	9.84		0.6087	27.81
0.6095	27.17		0.6095	69.01		0.6095	9.84		0.6095	27.86
0.6103	27.17		0.6103	69.03		0.6103	9.84		0.6103	27.91
0.6111	27.18		0.6111	69.02		0.6111	9.85		0.6111	27.96
0.6119	27.19		0.6119	68.98		0.6119	9.87		0.6119	28.01
0.6127	27.21		0.6127	68.92		0.6127	9.89		0.6127	28.05
0.6134	27.25		0.6134	68.84		0.6134	9.9		0.6134	28.09
0.6142	27.29		0.6142	68.74		0.6142	9.91		0.6142	28.14
0.615	27.33		0.615	68.61		0.615	9.92		0.615	28.19
0.6158	27.37		0.6158	68.47		0.6158	9.92		0.6158	28.25
0.6166	27.43		0.6166	68.32		0.6166	9.92		0.6166	28.31
0.6174	27.5		0.6174	68.18		0.6174	9.93		0.6174	28.38
0.6182	27.59		0.6182	68.06		0.6182	9.94		0.6182	28.45
0.619	27.69		0.619	67.96		0.619	9.95		0.619	28.54
0.6198	27.81		0.6198	67.89		0.6198	9.96		0.6198	28.63
0.6206	27.92		0.6206	67.84		0.6206	9.97		0.6206	28.75
0.6214	28.03		0.6214	67.84		0.6214	9.98		0.6214	28.88
0.6222	28.12		0.6222	67.89		0.6222	9.99		0.6222	28.99
0.623	28.18		0.623	67.96		0.623	9.99		0.623	29.1
0.6238	28.21		0.6238	68.05		0.6238	9.99		0.6238	29.18
0.6246	28.25		0.6246	68.15		0.6246	9.99		0.6246	29.23
0.6254	28.27		0.6254	68.26		0.6254	9.99		0.6254	29.29
0.6262	28.29		0.6262	68.35		0.6262	9.98		0.6262	29.35
0.627	28.31		0.627	68.42		0.627	9.97		0.627	29.41
0.6278	28.34		0.6278	68.46		0.6278	9.96		0.6278	29.47
0.6286	28.38		0.6286	68.47		0.6286	9.96		0.6286	29.51
0.6294	28.42		0.6294	68.47		0.6294	9.96		0.6294	29.55
0.6302	28.47		0.6302	68.46		0.6302	9.97		0.6302	29.58
0.631	28.53		0.631	68.45		0.631	9.98		0.631	29.6
0.6318	28.58		0.6318	68.44		0.6318	9.99		0.6318	29.6
0.6326	28.64		0.6326	68.41		0.6326	10		0.6326	29.58
0.6334	28.7		0.6334	68.38		0.6334	10.01		0.6334	29.55
0.6342	28.76		0.6342	68.36		0.6342	10.02		0.6342	29.52
0.635	28.81		0.635	68.35		0.635	10.03		0.635	29.5
0.6358	28.87		0.6358	68.33		0.6358	10.05		0.6358	29.5
0.6366	28.94		0.6366	68.29		0.6366	10.08		0.6366	29.49
0.6373	29		0.6373	68.23		0.6373	10.11		0.6373	29.47
0.6381	29.05		0.6381	68.16		0.6381	10.14		0.6381	29.44
0.6389	29.09		0.6389	68.08		0.6389	10.16		0.6389	29.39
0.6397	29.13		0.6397	68.01		0.6397	10.18		0.6397	29.3
0.6405	29.17		0.6405	67.92		0.6405	10.16		0.6405	29.18
0.6413	29.24		0.6413	67.82		0.6413	10.14		0.6413	29.04
0.6421	29.29		0.6421	67.7		0.6421	10.16		0.6421	28.9
0.6429	29.35		0.6429	67.56		0.6429	10.18		0.6429	28.75
0.6437	29.41		0.6437	67.4		0.6437	10.2		0.6437	28.61
0.6445	29.47		0.6445	67.24		0.6445	10.22		0.6445	28.46
0.6453	29.53		0.6453	67.06		0.6453	10.24		0.6453	28.28
0.6461	29.6		0.6461	66.89		0.6461	10.26		0.6461	28.06
0.6469	29.68		0.6469	66.74		0.6469	10.28		0.6469	27.8
0.6477	29.77		0.6477	66.61		0.6477	10.3		0.6477	27.51
0.6485	29.86		0.6485	66.48		0.6485	10.32		0.6485	27.22
0.6493	29.95		0.6493	66.34		0.6493	10.35		0.6493	26.94
0.6501	30.03		0.6501	66.18		0.6501	10.38		0.6501	26.69
0.6509	30.12		0.6509	66		0.6509	10.41		0.6509	26.45
0.6517	30.21		0.6517	65.82		0.6517	10.44		0.6517	26.22
0.6525	30.3		0.6525	65.64		0.6525	10.47		0.6525	26.01
0.6533	30.39		0.6533	65.45		0.6533	10.5		0.6533	25.79
0.6541	30.47		0.6541	65.26		0.6541	10.53		0.6541	25.55
0.6549	30.54		0.6549	65.06		0.6549	10.56		0.6549	25.28
0.6557	30.6		0.6557	64.85		0.6557	10.6		0.6557	25.01
0.6565	30.65		0.6565	64.63		0.6565	10.64		0.6565	24.76
0.6573	30.71		0.6573	64.39		0.6573	10.68		0.6573	24.55
0.6581	30.77		0.6581	64.13		0.6581	10.71		0.6581	24.36
0.6589	30.84		0.6589	63.85		0.6589	10.74		0.6589	24.17
0.6597	30.93		0.6597	63.57		0.6597	10.78		0.6597	23.97
0.6605	31.03		0.6605	63.29		0.6605	10.81		0.6605	23.76
0.6612	31.13		0.6612	63.04		0.6612	10.84		0.6612	23.57
0.662	31.25		0.662	62.81		0.662	10.86		0.662	23.41
0.6628	31.37		0.6628	62.61		0.6628	10.88		0.6628	23.27
0.6636	31.5		0.6636	62.43		0.6636	10.9		0.6636	23.14
0.6644	31.62		0.6644	62.26		0.6644	10.93		0.6644	22.98
0.6652	31.71		0.6652	62.1		0.6652	10.96		0.6652	22.81
0.666	31.77		0.666	61.94		0.666	10.99		0.666	22.63
0.6668	31.79		0.6668	61.76		0.6668	11.03		0.6668	22.46
0.6676	31.81		0.6676	61.58		0.6676	11.07		0.6676	22.27
0.6684	31.82		0.6684	61.39		0.6684	11.11		0.6684	22.09
0.6692	31.84		0.6692	61.21		0.6692	11.16		0.6692	21.92
0.67	31.88		0.67	61.04		0.67	11.2		0.67	21.76
0.6708	31.92		0.6708	60.89		0.6708	11.24		0.6708	21.62
0.6716	31.97		0.6716	60.74		0.6716	11.27		0.6716	21.51
0.6724	32.02		0.6724	60.6		0.6724	11.3		0.6724	21.44
0.6732	32.08		0.6732	60.47		0.6732	11.34		0.6732	21.4
0.674	32.14		0.674	60.31		0.674	11.38		0.674	21.39
0.6748	32.17		0.6748	60.14		0.6748	11.43		0.6748	21.38
0.6756	32.19		0.6756	59.98		0.6756	11.45		0.6756	21.38
0.6764	32.22		0.6764	59.83		0.6764	11.47		0.6764	21.38
0.6772	32.27		0.6772	59.7		0.6772	11.49		0.6772	21.38
0.678	32.33		0.678	59.59		0.678	11.52		0.678	21.38
0.6788	32.4		0.6788	59.5		0.6788	11.55		0.6788	21.39
0.6796	32.48		0.6796	59.43		0.6796	11.6		0.6796	21.39
0.6804	32.56		0.6804	59.37		0.6804	11.66		0.6804	21.37
0.6812	32.63		0.6812	59.32		0.6812	11.73		0.6812	21.34
0.682	32.69		0.682	59.28		0.682	11.79		0.682	21.28
0.6828	32.72		0.6828	59.26		0.6828	11.87		0.6828	21.18
0.6836	32.75		0.6836	59.23		0.6836	11.95		0.6836	21.07
0.6844	32.76		0.6844	59.2		0.6844	12.01		0.6844	20.94
0.6851	32.78		0.6851	59.16		0.6851	12.07		0.6851	20.82
0.6859	32.81		0.6859	59.13		0.6859	12.12		0.6859	20.71
0.6867	32.85		0.6867	59.11		0.6867	12.17		0.6867	20.61
0.6875	32.89		0.6875	59.08		0.6875	12.21		0.6875	20.52
0.6883	32.95		0.6883	59.05		0.6883	12.25		0.6883	20.47
0.6891	32.99		0.6891	59.05		0.6891	12.29		0.6891	20.45
0.6899	33.04		0.6899	59.07		0.6899	12.31		0.6899	20.43
0.6907	33.09		0.6907	59.12		0.6907	12.32		0.6907	20.4
0.6915	33.14		0.6915	59.2		0.6915	12.33		0.6915	20.37
0.6923	33.16		0.6923	59.29		0.6923	12.35		0.6923	20.33
0.6931	33.15		0.6931	59.4		0.6931	12.38		0.6931	20.28
0.6939	33.12		0.6939	59.52		0.6939	12.41		0.6939	20.22
0.6947	33.08		0.6947	59.65		0.6947	12.44		0.6947	20.16
0.6955	33.05		0.6955	59.76		0.6955	12.48		0.6955	20.11
0.6963	33.01		0.6963	59.86		0.6963	12.5		0.6963	20.09
0.6971	32.98		0.6971	59.94		0.6971	12.51		0.6971	20.08
0.6979	32.95		0.6979	59.98		0.6979	12.52		0.6979	20.08
0.6987	32.92		0.6987	59.97		0.6987	12.53		0.6987	20.05
0.6995	32.9		0.6995	59.89		0.6995	12.55		0.6995	20
0.7003	32.9		0.7003	59.76		0.7003	12.57		0.7003	19.92
0.7011	32.91		0.7011	59.58		0.7011	12.59		0.7011	19.81
0.7019	32.94		0.7019	59.39		0.7019	12.6		0.7019	19.69
0.7027	33		0.7027	59.23		0.7027	12.62		0.7027	19.56
0.7035	33.08		0.7035	59.12		0.7035	12.64		0.7035	19.41
0.7043	33.15		0.7043	59.05		0.7043	12.66		0.7043	19.27
0.7051	33.22		0.7051	59.01		0.7051	12.67		0.7051	19.14
0.7059	33.27		0.7059	58.98		0.7059	12.69		0.7059	19.01
0.7067	33.31		0.7067	58.95		0.7067	12.71		0.7067	18.88
0.7075	33.34		0.7075	58.93		0.7075	12.73		0.7075	18.75
0.7083	33.35		0.7083	58.92		0.7083	12.74		0.7083	18.63
0.7091	33.35		0.7091	58.92		0.7091	12.75		0.7091	18.54
0.7098	33.33		0.7098	58.92		0.7098	12.75		0.7098	18.46
0.7106	33.31		0.7106	58.91		0.7106	12.75		0.7106	18.4
0.7114	33.29		0.7114	58.88		0.7114	12.75		0.7114	18.36
0.7122	33.26		0.7122	58.85		0.7122	12.76		0.7122	18.36
0.713	33.24		0.713	58.82		0.713	12.77		0.713	18.39
0.7138	33.23		0.7138	58.78		0.7138	12.78		0.7138	18.44
0.7146	33.23		0.7146	58.75		0.7146	12.78		0.7146	18.5
0.7154	33.23		0.7154	58.73		0.7154	12.78		0.7154	18.56
0.7162	33.24		0.7162	58.71		0.7162	12.77		0.7162	18.63
0.717	33.24		0.717	58.7		0.717	12.75		0.717	18.71
0.7178	33.25		0.7178	58.7		0.7178	12.73		0.7178	18.81
0.7186	33.24		0.7186	58.7		0.7186	12.72		0.7186	18.94
0.7194	33.2		0.7194	58.69		0.7194	12.71		0.7194	19.1
0.7202	33.17		0.7202	58.7		0.7202	12.7		0.7202	19.28
0.721	33.13		0.721	58.71		0.721	12.7		0.721	19.47
0.7218	33.11		0.7218	58.73		0.7218	12.69		0.7218	19.65
0.7226	33.1		0.7226	58.75		0.7226	12.68		0.7226	19.82
0.7234	33.1		0.7234	58.78		0.7234	12.67		0.7234	19.97
0.7242	33.12		0.7242	58.8		0.7242	12.66		0.7242	20.09
0.725	33.14		0.725	58.81		0.725	12.64		0.725	20.21
0.7258	33.16		0.7258	58.8		0.7258	12.62		0.7258	20.31
0.7266	33.18		0.7266	58.77		0.7266	12.59		0.7266	20.4
0.7274	33.2		0.7274	58.72		0.7274	12.56		0.7274	20.48
0.7282	33.21		0.7282	58.69		0.7282	12.53		0.7282	20.58
0.729	33.2		0.729	58.7		0.729	12.5		0.729	20.68
0.7298	33.17		0.7298	58.76		0.7298	12.46		0.7298	20.78
0.7306	33.13		0.7306	58.86		0.7306	12.42		0.7306	20.88
0.7314	33.09		0.7314	58.98		0.7314	12.39		0.7314	20.99
0.7322	33.04		0.7322	59.11		0.7322	12.36		0.7322	21.1
0.733	32.99		0.733	59.24		0.733	12.32		0.733	21.21
0.7337	32.94		0.7337	59.36		0.7337	12.3		0.7337	21.3
0.7345	32.9		0.7345	59.48		0.7345	12.31		0.7345	21.38
0.7353	32.87		0.7353	59.61		0.7353	12.34		0.7353	21.47
0.7361	32.85		0.7361	59.76		0.7361	12.38		0.7361	21.57
0.7369	32.82		0.7369	59.95		0.7369	12.42		0.7369	21.68
0.7377	32.79		0.7377	60.18		0.7377	12.43		0.7377	21.78
0.7385	32.75		0.7385	60.45		0.7385	12.41		0.7385	21.87
0.7393	32.68		0.7393	60.74		0.7393	12.38		0.7393	21.95
0.7401	32.6		0.7401	61.03		0.7401	12.36		0.7401	22.01
0.7409	32.52		0.7409	61.3		0.7409	12.33		0.7409	22.06
0.7417	32.41		0.7417	61.54		0.7417	12.31		0.7417	22.09
0.7425	32.3		0.7425	61.74		0.7425	12.29		0.7425	22.12
0.7433	32.18		0.7433	61.91		0.7433	12.27		0.7433	22.14
0.7441	32.07		0.7441	62.05		0.7441	12.24		0.7441	22.16
0.7449	31.98		0.7449	62.17		0.7449	12.21		0.7449	22.15
0.7457	31.94		0.7457	62.28		0.7457	12.19		0.7457	22.12
0.7465	31.96		0.7465	62.4		0.7465	12.16		0.7465	22.07
0.7473	32.03		0.7473	62.52		0.7473	12.13		0.7473	22.03
0.7481	32.13		0.7481	62.65		0.7481	12.1		0.7481	21.97
0.7489	32.22		0.7489	62.78		0.7489	12.06		0.7489	21.91
0.7497	32.28		0.7497	62.9		0.7497	12.02		0.7497	21.84
0.7505	32.32		0.7505	62.99		0.7505	11.98		0.7505	21.77
0.7513	32.34		0.7513	63.08		0.7513	11.95		0.7513	21.67
0.7521	32.33		0.7521	63.15		0.7521	11.92		0.7521	21.55
0.7529	32.3		0.7529	63.2		0.7529	11.88		0.7529	21.41
0.7537	32.27		0.7537	63.27		0.7537	11.83		0.7537	21.27
0.7545	32.25		0.7545	63.35		0.7545	11.78		0.7545	21.14
0.7553	32.24		0.7553	63.46		0.7553	11.75		0.7553	21.01
0.7561	32.23		0.7561	63.59		0.7561	11.72		0.7561	20.89
0.7569	32.19		0.7569	63.73		0.7569	11.69		0.7569	20.76
0.7576	32.14		0.7576	63.88		0.7576	11.66		0.7576	20.62
0.7584	32.08		0.7584	64.01		0.7584	11.63		0.7584	20.45
0.7592	32.01		0.7592	64.11		0.7592	11.58		0.7592	20.28
0.76	31.93		0.76	64.19		0.76	11.53		0.76	20.12
0.7608	31.86		0.7608	64.26		0.7608	11.47		0.7608	19.97
0.7616	31.81		0.7616	64.31		0.7616	11.42		0.7616	19.84
0.7624	31.8		0.7624	64.33		0.7624	11.35		0.7624	19.75
0.7632	31.81		0.7632	64.31		0.7632	11.28		0.7632	19.67
0.764	31.85		0.764	64.25		0.764	11.22		0.764	19.61
0.7648	31.88		0.7648	64.17		0.7648	11.16		0.7648	19.55
0.7656	31.92		0.7656	64.08		0.7656	11.11		0.7656	19.49
0.7664	31.95		0.7664	63.99		0.7664	11.06		0.7664	19.43
0.7672	31.97		0.7672	63.91		0.7672	11.02		0.7672	19.39
0.768	31.96		0.768	63.84		0.768	10.98		0.768	19.37
0.7688	31.93		0.7688	63.75		0.7688	10.94		0.7688	19.33
0.7696	31.88		0.7696	63.65		0.7696	10.92		0.7696	19.28
0.7704	31.82		0.7704	63.54		0.7704	10.9		0.7704	19.23
0.7712	31.75		0.7712	63.44		0.7712	10.88		0.7712	19.17
0.772	31.7		0.772	63.35		0.772	10.89		0.772	19.12
0.7728	31.67		0.7728	63.26		0.7728	10.93		0.7728	19.07
0.7736	31.66		0.7736	63.15		0.7736	11		0.7736	19.03
0.7744	31.65		0.7744	63.03		0.7744	11.04		0.7744	18.99
0.7752	31.64		0.7752	62.9		0.7752	11.03		0.7752	18.95
0.776	31.62		0.776	62.75		0.776	11		0.776	18.88
0.7768	31.58		0.7768	62.6		0.7768	10.97		0.7768	18.79
0.7776	31.52		0.7776	62.46		0.7776	10.94		0.7776	18.7
0.7784	31.44		0.7784	62.35		0.7784	10.91		0.7784	18.63
0.7792	31.33		0.7792	62.28		0.7792	10.87		0.7792	18.57
0.78	31.21		0.78	62.26		0.78	10.83		0.78	18.53
0.7808	31.08		0.7808	62.3		0.7808	10.79		0.7808	18.51
0.7815	30.94		0.7815	62.37		0.7815	10.76		0.7815	18.51
0.7823	30.8		0.7823	62.43		0.7823	10.73		0.7823	18.52
0.7831	30.67		0.7831	62.45		0.7831	10.71		0.7831	18.57
0.7839	30.54		0.7839	62.44		0.7839	10.68		0.7839	18.64
0.7847	30.41		0.7847	62.41		0.7847	10.66		0.7847	18.72
0.7855	30.3		0.7855	62.4		0.7855	10.64		0.7855	18.8
0.7863	30.19		0.7863	62.39		0.7863	10.62		0.7863	18.88
0.7871	30.09		0.7871	62.37		0.7871	10.6		0.7871	18.96
0.7879	30		0.7879	62.35		0.7879	10.58		0.7879	19.03
0.7887	29.92		0.7887	62.32		0.7887	10.56		0.7887	19.07
0.7895	29.87		0.7895	62.29		0.7895	10.54		0.7895	19.11
0.7903	29.82		0.7903	62.28		0.7903	10.52		0.7903	19.14
0.7911	29.77		0.7911	62.28		0.7911	10.5		0.7911	19.16
0.7919	29.72		0.7919	62.28		0.7919	10.48		0.7919	19.16
0.7927	29.67		0.7927	62.25		0.7927	10.45		0.7927	19.13
0.7935	29.61		0.7935	62.2		0.7935	10.42		0.7935	19.06
0.7943	29.55		0.7943	62.12		0.7943	10.41		0.7943	18.98
0.7951	29.48		0.7951	62.03		0.7951	10.4		0.7951	18.89
0.7959	29.4		0.7959	61.95		0.7959	10.39		0.7959	18.78
0.7967	29.32		0.7967	61.87		0.7967	10.39		0.7967	18.65
0.7975	29.24		0.7975	61.78		0.7975	10.39		0.7975	18.48
0.7983	29.19		0.7983	61.68		0.7983	10.39		0.7983	18.29
0.7991	29.16		0.7991	61.57		0.7991	10.39		0.7991	18.09
0.7999	29.11		0.7999	61.45		0.7999	10.39		0.7999	17.89
0.8007	29.06		0.8007	61.33		0.8007	10.37		0.8007	17.7
0.8015	29		0.8015	61.21		0.8015	10.36		0.8015	17.52
0.8023	28.93		0.8023	61.11		0.8023	10.35		0.8023	17.36
0.8031	28.85		0.8031	61		0.8031	10.34		0.8031	17.22
0.8039	28.77		0.8039	60.89		0.8039	10.32		0.8039	17.11
0.8047	28.69		0.8047	60.8		0.8047	10.31		0.8047	17
0.8054	28.59		0.8054	60.72		0.8054	10.3		0.8054	16.91
0.8062	28.48		0.8062	60.67		0.8062	10.3		0.8062	16.82
0.807	28.37		0.807	60.62		0.807	10.3		0.807	16.74
0.8078	28.27		0.8078	60.53		0.8078	10.3		0.8078	16.65
0.8086	28.19		0.8086	60.39		0.8086	10.29		0.8086	16.56
0.8094	28.15		0.8094	60.19		0.8094	10.29		0.8094	16.46
0.8102	28.1		0.8102	59.97		0.8102	10.29		0.8102	16.36
0.811	28.05		0.811	59.73		0.811	10.28		0.811	16.25
0.8118	28.01		0.8118	59.49		0.8118	10.28		0.8118	16.14
0.8126	27.97		0.8126	59.26		0.8126	10.29		0.8126	16.03
0.8134	27.94		0.8134	59.03		0.8134	10.27		0.8134	15.93
0.8142	27.92		0.8142	58.8		0.8142	10.22		0.8142	15.85
0.815	27.9		0.815	58.56		0.815	10.14		0.815	15.76
0.8158	27.89		0.8158	58.31		0.8158	10.09		0.8158	15.65
0.8166	27.89		0.8166	58.03		0.8166	10.04		0.8166	15.53
0.8174	27.88		0.8174	57.74		0.8174	10		0.8174	15.42
0.8182	27.87		0.8182	57.44		0.8182	9.97		0.8182	15.31
0.819	27.88		0.819	57.14		0.819	9.95		0.819	15.21
0.8198	27.89		0.8198	56.85		0.8198	9.94		0.8198	15.12
0.8206	27.9		0.8206	56.58		0.8206	9.94		0.8206	15.04
0.8214	27.92		0.8214	56.32		0.8214	9.94		0.8214	14.97
0.8222	27.94		0.8222	56.09		0.8222	9.94		0.8222	14.9
0.823	27.95		0.823	55.87		0.823	9.94		0.823	14.83
0.8238	27.95		0.8238	55.65		0.8238	9.94		0.8238	14.76
0.8246	27.95		0.8246	55.43		0.8246	9.94		0.8246	14.7
0.8254	27.92		0.8254	55.21		0.8254	9.94		0.8254	14.65
0.8262	27.86		0.8262	54.98		0.8262	9.94		0.8262	14.61
0.827	27.76		0.827	54.74		0.827	9.94		0.827	14.58
0.8278	27.63		0.8278	54.49		0.8278	9.95		0.8278	14.55
0.8286	27.51		0.8286	54.24		0.8286	9.97		0.8286	14.52
0.8293	27.4		0.8293	54.01		0.8293	10		0.8293	14.49
0.8301	27.33		0.8301	53.8		0.8301	10.04		0.8301	14.46
0.8309	27.28		0.8309	53.6		0.8309	10.07		0.8309	14.43
0.8317	27.27		0.8317	53.42		0.8317	10.1		0.8317	14.4
0.8325	27.27		0.8325	53.26		0.8325	10.13		0.8325	14.38
0.8333	27.27		0.8333	53.1		0.8333	10.17		0.8333	14.36
0.8341	27.28		0.8341	52.94		0.8341	10.21		0.8341	14.35
0.8349	27.29		0.8349	52.77		0.8349	10.25		0.8349	14.35
0.8357	27.29		0.8357	52.59		0.8357	10.29		0.8357	14.36
0.8365	27.3		0.8365	52.39		0.8365	10.33		0.8365	14.39
0.8373	27.29		0.8373	52.17		0.8373	10.37		0.8373	14.43
0.8381	27.28		0.8381	51.94		0.8381	10.4		0.8381	14.48
0.8389	27.27		0.8389	51.7		0.8389	10.43		0.8389	14.53
0.8397	27.27		0.8397	51.46		0.8397	10.45		0.8397	14.58
0.8405	27.28		0.8405	51.23		0.8405	10.47		0.8405	14.63
0.8413	27.3		0.8413	51.02		0.8413	10.49		0.8413	14.68
0.8421	27.33		0.8421	50.82		0.8421	10.51		0.8421	14.72
0.8429	27.36		0.8429	50.66		0.8429	10.52		0.8429	14.78
0.8437	27.36		0.8437	50.53		0.8437	10.54		0.8437	14.84
0.8445	27.37		0.8445	50.42		0.8445	10.56		0.8445	14.91
0.8453	27.36		0.8453	50.33		0.8453	10.58		0.8453	14.98
0.8461	27.34		0.8461	50.26		0.8461	10.59		0.8461	15.03
0.8469	27.31		0.8469	50.19		0.8469	10.6		0.8469	15.07
0.8477	27.29		0.8477	50.12		0.8477	10.61		0.8477	15.1
0.8485	27.28		0.8485	50.06		0.8485	10.62		0.8485	15.15
0.8493	27.29		0.8493	50		0.8493	10.63		0.8493	15.22
0.8501	27.32		0.8501	49.95		0.8501	10.64		0.8501	15.31
0.8509	27.38		0.8509	49.9		0.8509	10.65		0.8509	15.42
0.8517	27.47		0.8517	49.85		0.8517	10.61		0.8517	15.54
0.8525	27.58		0.8525	49.81		0.8525	10.54		0.8525	15.67
0.8533	27.71		0.8533	49.8		0.8533	10.44		0.8533	15.79
0.854	27.86		0.854	49.81		0.854	10.37		0.854	15.89
0.8548	28		0.8548	49.87		0.8548	10.34		0.8548	15.98
0.8556	28.13		0.8556	49.97		0.8556	10.35		0.8556	16.06
0.8564	28.24		0.8564	50.08		0.8564	10.35		0.8564	16.15
0.8572	28.34		0.8572	50.22		0.8572	10.35		0.8572	16.23
0.858	28.42		0.858	50.37		0.858	10.35		0.858	16.29
0.8588	28.49		0.8588	50.53		0.8588	10.35		0.8588	16.34
0.8596	28.57		0.8596	50.69		0.8596	10.35		0.8596	16.37
0.8604	28.65		0.8604	50.83		0.8604	10.35		0.8604	16.4
0.8612	28.72		0.8612	50.93		0.8612	10.35		0.8612	16.42
0.862	28.81		0.862	51.01		0.862	10.35		0.862	16.43
0.8628	28.9		0.8628	51.08		0.8628	10.35		0.8628	16.42
0.8636	29.01		0.8636	51.14		0.8636	10.36		0.8636	16.39
0.8644	29.14		0.8644	51.21		0.8644	10.36		0.8644	16.34
0.8652	29.28		0.8652	51.28		0.8652	10.36		0.8652	16.3
0.866	29.43		0.866	51.37		0.866	10.36		0.866	16.27
0.8668	29.58		0.8668	51.49		0.8668	10.36		0.8668	16.25
0.8676	29.76		0.8676	51.62		0.8676	10.36		0.8676	16.23
0.8684	29.94		0.8684	51.75		0.8684	10.36		0.8684	16.23
0.8692	30.12		0.8692	51.87		0.8692	10.36		0.8692	16.23
0.87	30.3		0.87	51.97		0.87	10.36		0.87	16.23
0.8708	30.49		0.8708	52.07		0.8708	10.36		0.8708	16.24
0.8716	30.68		0.8716	52.18		0.8716	10.35		0.8716	16.26
0.8724	30.86		0.8724	52.3		0.8724	10.36		0.8724	16.29
0.8732	31.07		0.8732	52.45		0.8732	10.38		0.8732	16.34
0.874	31.26		0.874	52.62		0.874	10.39		0.874	16.38
0.8748	31.45		0.8748	52.81		0.8748	10.38		0.8748	16.41
0.8756	31.62		0.8756	52.99		0.8756	10.37		0.8756	16.45
0.8764	31.81		0.8764	53.17		0.8764	10.36		0.8764	16.49
0.8772	32.02		0.8772	53.34		0.8772	10.35		0.8772	16.54
0.8779	32.22		0.8779	53.49		0.8779	10.34		0.8779	16.59
0.8787	32.42		0.8787	53.63		0.8787	10.33		0.8787	16.64
0.8795	32.61		0.8795	53.76		0.8795	10.32		0.8795	16.69
0.8803	32.8		0.8803	53.89		0.8803	10.32		0.8803	16.74
0.8811	32.99		0.8811	54.02		0.8811	10.31		0.8811	16.79
0.8819	33.19		0.8819	54.14		0.8819	10.3		0.8819	16.83
0.8827	33.41		0.8827	54.26		0.8827	10.29		0.8827	16.87
0.8835	33.62		0.8835	54.38		0.8835	10.29		0.8835	16.9
0.8843	33.82		0.8843	54.47		0.8843	10.29		0.8843	16.93
0.8851	34.01		0.8851	54.55		0.8851	10.29		0.8851	16.96
0.8859	34.2		0.8859	54.62		0.8859	10.29		0.8859	17
0.8867	34.4		0.8867	54.69		0.8867	10.29		0.8867	17.03
0.8875	34.62		0.8875	54.77		0.8875	10.29		0.8875	17.06
0.8883	34.86		0.8883	54.87		0.8883	10.29		0.8883	17.08
0.8891	35.1		0.8891	54.99		0.8891	10.29		0.8891	17.1
0.8899	35.34		0.8899	55.1		0.8899	10.29		0.8899	17.12
0.8907	35.56		0.8907	55.2		0.8907	10.29		0.8907	17.14
0.8915	35.77		0.8915	55.29		0.8915	10.28		0.8915	17.16
0.8923	35.98		0.8923	55.36		0.8923	10.27		0.8923	17.17
0.8931	36.19		0.8931	55.44		0.8931	10.28		0.8931	17.18
0.8939	36.39		0.8939	55.52		0.8939	10.28		0.8939	17.19
0.8947	36.59		0.8947	55.6		0.8947	10.29		0.8947	17.2
0.8955	36.77		0.8955	55.68		0.8955	10.25		0.8955	17.21
0.8963	36.92		0.8963	55.76		0.8963	10.21		0.8963	17.22
0.8971	37.05		0.8971	55.83		0.8971	10.19		0.8971	17.22
0.8979	37.17		0.8979	55.89		0.8979	10.19		0.8979	17.23
0.8987	37.28		0.8987	55.94		0.8987	10.19		0.8987	17.24
0.8995	37.39		0.8995	55.98		0.8995	10.18		0.8995	17.25
0.9003	37.5		0.9003	55.99		0.9003	10.17		0.9003	17.26
0.9011	37.61		0.9011	56		0.9011	10.16		0.9011	17.27
0.9018	37.72		0.9018	56.01		0.9018	10.15		0.9018	17.29
0.9026	37.84		0.9026	56.03		0.9026	10.14		0.9026	17.31
0.9034	37.99		0.9034	56.07		0.9034	10.13		0.9034	17.33
0.9042	38.16		0.9042	56.14		0.9042	10.12		0.9042	17.35
0.905	38.35		0.905	56.23		0.905	10.11		0.905	17.37
0.9058	38.54		0.9058	56.35		0.9058	10.1		0.9058	17.39
0.9066	38.74		0.9066	56.46		0.9066	10.09		0.9066	17.4
0.9074	38.96		0.9074	56.55		0.9074	10.07		0.9074	17.42
0.9082	39.16		0.9082	56.61		0.9082	10.05		0.9082	17.44
0.909	39.33		0.909	56.63		0.909	10.03		0.909	17.45
0.9098	39.47		0.9098	56.62		0.9098	10.01		0.9098	17.46
0.9106	39.6		0.9106	56.6		0.9106	9.99		0.9106	17.47
0.9114	39.71		0.9114	56.57		0.9114	9.97		0.9114	17.48
0.9122	39.82		0.9122	56.54		0.9122	9.95		0.9122	17.49
0.913	39.95		0.913	56.5		0.913	9.93		0.913	17.51
0.9138	40.07		0.9138	56.46		0.9138	9.91		0.9138	17.52
0.9146	40.19		0.9146	56.41		0.9146	9.89		0.9146	17.51
0.9154	40.31		0.9154	56.36		0.9154	9.87		0.9154	17.49
0.9162	40.42		0.9162	56.31		0.9162	9.85		0.9162	17.45
0.917	40.54		0.917	56.25		0.917	9.82		0.917	17.4
0.9178	40.65		0.9178	56.2		0.9178	9.8		0.9178	17.34
0.9186	40.76		0.9186	56.15		0.9186	9.78		0.9186	17.27
0.9194	40.87		0.9194	56.09		0.9194	9.77		0.9194	17.19
0.9202	40.97		0.9202	56.01		0.9202	9.76		0.9202	17.1
0.921	41.05		0.921	55.92		0.921	9.77		0.921	17
0.9218	41.11		0.9218	55.83		0.9218	9.78		0.9218	16.9
0.9226	41.16		0.9226	55.73		0.9226	9.8		0.9226	16.79
0.9234	41.21		0.9234	55.63		0.9234	9.82		0.9234	16.69
0.9242	41.25		0.9242	55.53		0.9242	9.83		0.9242	16.59
0.925	41.31		0.925	55.42		0.925	9.83		0.925	16.5
0.9257	41.37		0.9257	55.3		0.9257	9.85		0.9257	16.41
0.9265	41.45		0.9265	55.18		0.9265	9.86		0.9265	16.3
0.9273	41.53		0.9273	55.06		0.9273	9.87		0.9273	16.17
0.9281	41.62		0.9281	54.92		0.9281	9.87		0.9281	16.04
0.9289	41.71		0.9289	54.78		0.9289	9.86		0.9289	15.9
0.9297	41.79		0.9297	54.63		0.9297	9.85		0.9297	15.77
0.9305	41.84		0.9305	54.48		0.9305	9.84		0.9305	15.62
0.9313	41.86		0.9313	54.33		0.9313	9.84		0.9313	15.46
0.9321	41.86		0.9321	54.17		0.9321	9.85		0.9321	15.3
0.9329	41.85		0.9329	53.99		0.9329	9.88		0.9329	15.15
0.9337	41.82		0.9337	53.79		0.9337	9.92		0.9337	15.01
0.9345	41.8		0.9345	53.55		0.9345	9.97		0.9345	14.89
0.9353	41.79		0.9353	53.29		0.9353	10.02		0.9353	14.79
0.9361	41.8		0.9361	53.02		0.9361	10.08		0.9361	14.68
0.9369	41.81		0.9369	52.74		0.9369	10.13		0.9369	14.58
0.9377	41.82		0.9377	52.46		0.9377	10.17		0.9377	14.5
0.9385	41.83		0.9385	52.19		0.9385	10.2		0.9385	14.42
0.9393	41.82		0.9393	51.93		0.9393	10.22		0.9393	14.35
0.9401	41.82		0.9401	51.68		0.9401	10.24		0.9401	14.27
0.9409	41.84		0.9409	51.44		0.9409	10.25		0.9409	14.19
0.9417	41.86		0.9417	51.2		0.9417	10.26		0.9417	14.1
0.9425	41.88		0.9425	50.97		0.9425	10.26		0.9425	14.01
0.9433	41.9		0.9433	50.73		0.9433	10.26		0.9433	13.91
0.9441	41.9		0.9441	50.48		0.9441	10.27		0.9441	13.81
0.9449	41.9		0.9449	50.22		0.9449	10.28		0.9449	13.69
0.9457	41.9		0.9457	49.96		0.9457	10.29		0.9457	13.56
0.9465	41.89		0.9465	49.69		0.9465	10.3		0.9465	13.42
0.9473	41.87		0.9473	49.42		0.9473	10.31		0.9473	13.29
0.9481	41.84		0.9481	49.14		0.9481	10.32		0.9481	13.16
0.9489	41.8		0.9489	48.86		0.9489	10.32		0.9489	13.04
0.9496	41.76		0.9496	48.57		0.9496	10.32		0.9496	12.93
0.9504	41.73		0.9504	48.28		0.9504	10.32		0.9504	12.82
0.9512	41.7		0.9512	47.98		0.9512	10.32		0.9512	12.71
0.952	41.67		0.952	47.67		0.952	10.31		0.952	12.6
0.9528	41.61		0.9528	47.34		0.9528	10.29		0.9528	12.49
0.9536	41.58		0.9536	47		0.9536	10.27		0.9536	12.39
0.9544	41.53		0.9544	46.65		0.9544	10.27		0.9544	12.3
0.9552	41.49		0.9552	46.29		0.9552	10.27		0.9552	12.2
0.956	41.44		0.956	45.94		0.956	10.28		0.956	12.11
0.9568	41.37		0.9568	45.61		0.9568	10.29		0.9568	12.03
0.9576	41.31		0.9576	45.32		0.9576	10.31		0.9576	11.95
0.9584	41.26		0.9584	45.06		0.9584	10.33		0.9584	11.86
0.9592	41.24		0.9592	44.8		0.9592	10.35		0.9592	11.78
0.96	41.23		0.96	44.55		0.96	10.37		0.96	11.69
0.9608	41.22		0.9608	44.29		0.9608	10.39		0.9608	11.61
0.9616	41.2		0.9616	44.03		0.9616	10.41		0.9616	11.54
0.9624	41.14		0.9624	43.77		0.9624	10.42		0.9624	11.47
0.9632	41.08		0.9632	43.52		0.9632	10.44		0.9632	11.41
0.964	41.02		0.964	43.28		0.964	10.45		0.964	11.35
0.9648	40.99		0.9648	43.05		0.9648	10.46		0.9648	11.29
0.9656	40.96		0.9656	42.81		0.9656	10.47		0.9656	11.23
0.9664	40.9		0.9664	42.59		0.9664	10.49		0.9664	11.18
0.9672	40.81		0.9672	42.39		0.9672	10.52		0.9672	11.13
0.968	40.68		0.968	42.22		0.968	10.55		0.968	11.09
0.9688	40.54		0.9688	42.08		0.9688	10.58		0.9688	11.05
0.9696	40.42		0.9696	41.97		0.9696	10.6		0.9696	11.01
0.9704	40.33		0.9704	41.89		0.9704	10.62		0.9704	10.97
0.9712	40.28		0.9712	41.8		0.9712	10.64		0.9712	10.93
0.972	40.24		0.972	41.72		0.972	10.66		0.972	10.9
0.9728	40.23		0.9728	41.61		0.9728	10.67		0.9728	10.88
0.9736	40.23		0.9736	41.49		0.9736	10.69		0.9736	10.87
0.9743	40.23		0.9743	41.36		0.9743	10.7		0.9743	10.86
0.9751	40.22		0.9751	41.22		0.9751	10.72		0.9751	10.87
0.9759	40.2		0.9759	41.08		0.9759	10.74		0.9759	10.88
0.9767	40.2		0.9767	40.94		0.9767	10.76		0.9767	10.9
0.9775	40.19		0.9775	40.81		0.9775	10.78		0.9775	10.92
0.9783	40.19		0.9783	40.68		0.9783	10.8		0.9783	10.94
0.9791	40.21		0.9791	40.56		0.9791	10.83		0.9791	10.97
0.9799	40.28		0.9799	40.46		0.9799	10.86		0.9799	11
0.9807	40.41		0.9807	40.36		0.9807	10.89		0.9807	11.03
0.9815	40.56		0.9815	40.25		0.9815	10.92		0.9815	11.06
0.9823	40.68		0.9823	40.14		0.9823	10.95		0.9823	11.09
0.9831	40.72		0.9831	40.02		0.9831	10.98		0.9831	11.14
0.9839	40.72		0.9839	39.89		0.9839	11.02		0.9839	11.19
0.9847	40.69		0.9847	39.76		0.9847	11.07		0.9847	11.24
0.9855	40.67		0.9855	39.62		0.9855	11.12		0.9855	11.29
0.9863	40.63		0.9863	39.49		0.9863	11.17		0.9863	11.33
0.9871	40.59		0.9871	39.37		0.9871	11.21		0.9871	11.37
0.9879	40.56		0.9879	39.26		0.9879	11.24		0.9879	11.4
0.9887	40.56		0.9887	39.18		0.9887	11.28		0.9887	11.44
0.9895	40.57		0.9895	39.13		0.9895	11.3		0.9895	11.48
0.9903	40.55		0.9903	39.1		0.9903	11.32		0.9903	11.54
0.9911	40.54		0.9911	39.1		0.9911	11.34		0.9911	11.61
0.9919	40.53		0.9919	39.1		0.9919	11.36		0.9919	11.68
0.9927	40.51		0.9927	39.11		0.9927	11.38		0.9927	11.74
0.9935	40.49		0.9935	39.12		0.9935	11.4		0.9935	11.79
0.9943	40.46		0.9943	39.13		0.9943	11.42		0.9943	11.84
0.9951	40.41		0.9951	39.13		0.9951	11.43		0.9951	11.87
0.9959	40.35		0.9959	39.13		0.9959	11.44		0.9959	11.9
0.9967	40.3		0.9967	39.13		0.9967	11.45		0.9967	11.94
0.9975	40.28		0.9975	39.13		0.9975	11.45		0.9975	11.99
0.9982	40.27		0.9982	39.14		0.9982	11.45		0.9982	12.05
0.999	40.28		0.999	39.15		0.999	11.45		0.999	12.11
0.9998	40.29		0.9998	39.16		0.9998	11.45		0.9998	12.16
1.0006	40.28		1.0006	39.18		1.0006	11.43		1.0006	12.2
1.0014	40.26		1.0014	39.21		1.0014	11.41		1.0014	12.24
1.0022	40.23		1.0022	39.24		1.0022	11.39		1.0022	12.27
1.003	40.22		1.003	39.27		1.003	11.36		1.003	12.29
1.0038	40.23		1.0038	39.31		1.0038	11.33		1.0038	12.31
1.0046	40.24		1.0046	39.35		1.0046	11.31		1.0046	12.31
1.0054	40.26		1.0054	39.38		1.0054	11.28		1.0054	12.29
1.0062	40.25		1.0062	39.4		1.0062	11.26		1.0062	12.26
1.007	40.24		1.007	39.41		1.007	11.24		1.007	12.23
1.0078	40.22		1.0078	39.43		1.0078	11.23		1.0078	12.2
1.0086	40.18		1.0086	39.45		1.0086	11.23		1.0086	12.19
1.0094	40.11		1.0094	39.47		1.0094	11.23		1.0094	12.18
1.0102	40.04		1.0102	39.48		1.0102	11.23		1.0102	12.2
1.011	39.99		1.011	39.49		1.011	11.22		1.011	12.22
1.0118	39.94		1.0118	39.5		1.0118	11.2		1.0118	12.24
1.0126	39.88		1.0126	39.51		1.0126	11.16		1.0126	12.26
1.0134	39.84		1.0134	39.52		1.0134	11.11		1.0134	12.28
1.0142	39.78		1.0142	39.55		1.0142	11.05		1.0142	12.29
1.015	39.71		1.015	39.59		1.015	10.99		1.015	12.3
1.0158	39.63		1.0158	39.65		1.0158	10.93		1.0158	12.32
1.0166	39.55		1.0166	39.7		1.0166	10.88		1.0166	12.34
1.0174	39.49		1.0174	39.74		1.0174	10.84		1.0174	12.35
1.0182	39.45		1.0182	39.76		1.0182	10.81		1.0182	12.37
1.019	39.43		1.019	39.77		1.019	10.79		1.019	12.39
1.0198	39.41		1.0198	39.77		1.0198	10.77		1.0198	12.4
1.0206	39.38		1.0206	39.78		1.0206	10.76		1.0206	12.41
1.0214	39.32		1.0214	39.8		1.0214	10.75		1.0214	12.42
1.0221	39.26		1.0221	39.83		1.0221	10.74		1.0221	12.43
1.0229	39.18		1.0229	39.88		1.0229	10.73		1.0229	12.45
1.0237	39.1		1.0237	39.92		1.0237	10.72		1.0237	12.47
1.0245	39.03		1.0245	39.95		1.0245	10.71		1.0245	12.49
1.0253	38.94		1.0253	39.96		1.0253	10.7		1.0253	12.5
1.0261	38.85		1.0261	39.97		1.0261	10.69		1.0261	12.51
1.0269	38.76		1.0269	39.99		1.0269	10.68		1.0269	12.52
1.0277	38.69		1.0277	40.02		1.0277	10.67		1.0277	12.52
1.0285	38.63		1.0285	40.06		1.0285	10.67		1.0285	12.52
1.0293	38.57		1.0293	40.11		1.0293	10.67		1.0293	12.52
1.0301	38.51		1.0301	40.17		1.0301	10.67		1.0301	12.52
1.0309	38.45		1.0309	40.22		1.0309	10.68		1.0309	12.53
1.0317	38.39		1.0317	40.29		1.0317	10.68		1.0317	12.54
1.0325	38.34		1.0325	40.37		1.0325	10.69		1.0325	12.55
1.0333	38.3		1.0333	40.48		1.0333	10.69		1.0333	12.56
1.0341	38.29		1.0341	40.6		1.0341	10.69		1.0341	12.57
1.0349	38.29		1.0349	40.73		1.0349	10.69		1.0349	12.58
1.0357	38.28		1.0357	40.83		1.0357	10.68		1.0357	12.59
1.0365	38.26		1.0365	40.91		1.0365	10.67		1.0365	12.59
1.0373	38.23		1.0373	40.96		1.0373	10.65		1.0373	12.59
1.0381	38.2		1.0381	40.98		1.0381	10.63		1.0381	12.61
1.0389	38.16		1.0389	41		1.0389	10.61		1.0389	12.62
1.0397	38.12		1.0397	41		1.0397	10.59		1.0397	12.64
1.0405	38.07		1.0405	41		1.0405	10.57		1.0405	12.66
1.0413	38.02		1.0413	40.99		1.0413	10.55		1.0413	12.68
1.0421	37.98		1.0421	40.98		1.0421	10.55		1.0421	12.7
1.0429	37.95		1.0429	40.96		1.0429	10.54		1.0429	12.72
1.0437	37.93		1.0437	40.97		1.0437	10.54		1.0437	12.74
1.0445	37.89		1.0445	40.99		1.0445	10.54		1.0445	12.75
1.0453	37.84		1.0453	41.03		1.0453	10.53		1.0453	12.76
1.046	37.78		1.046	41.07		1.046	10.51		1.046	12.77
1.0468	37.76		1.0468	41.1		1.0468	10.48		1.0468	12.79
1.0476	37.79		1.0476	41.12		1.0476	10.45		1.0476	12.81
1.0484	37.81		1.0484	41.12		1.0484	10.42		1.0484	12.84
1.0492	37.82		1.0492	41.12		1.0492	10.4		1.0492	12.87
1.05	37.83		1.05	41.11		1.05	10.39		1.05	12.91
1.0508	37.81		1.0508	41.12		1.0508	10.38		1.0508	12.95
1.0516	37.77		1.0516	41.13		1.0516	10.36		1.0516	12.99
1.0524	37.68		1.0524	41.15		1.0524	10.34		1.0524	13.03
1.0532	37.57		1.0532	41.17		1.0532	10.32		1.0532	13.07
1.054	37.44		1.054	41.2		1.054	10.3		1.054	13.1
1.0548	37.33		1.0548	41.24		1.0548	10.28		1.0548	13.12
1.0556	37.26		1.0556	41.3		1.0556	10.26		1.0556	13.12
1.0564	37.21		1.0564	41.36		1.0564	10.24		1.0564	13.11
1.0572	37.19		1.0572	41.41		1.0572	10.22		1.0572	13.1
1.058	37.18		1.058	41.45		1.058	10.2		1.058	13.1
1.0588	37.16		1.0588	41.48		1.0588	10.17		1.0588	13.09
1.0596	37.1		1.0596	41.5		1.0596	10.14		1.0596	13.09
1.0604	36.98		1.0604	41.52		1.0604	10.11		1.0604	13.09
1.0612	36.86		1.0612	41.54		1.0612	10.08		1.0612	13.08
1.062	36.77		1.062	41.56		1.062	10.05		1.062	13.07
1.0628	36.75		1.0628	41.59		1.0628	10.02		1.0628	13.04
1.0636	36.74		1.0636	41.62		1.0636	9.98		1.0636	13
1.0644	36.75		1.0644	41.64		1.0644	9.93		1.0644	12.96
1.0652	36.73		1.0652	41.65		1.0652	9.88		1.0652	12.93
1.066	36.72		1.066	41.66		1.066	9.83		1.066	12.91
1.0668	36.71		1.0668	41.68		1.0668	9.79		1.0668	12.89
1.0676	36.7		1.0676	41.69		1.0676	9.74		1.0676	12.88
1.0684	36.68		1.0684	41.69		1.0684	9.68		1.0684	12.86
1.0692	36.65		1.0692	41.66		1.0692	9.64		1.0692	12.84
1.0699	36.65		1.0699	41.62		1.0699	9.6		1.0699	12.8
1.0707	36.62		1.0707	41.57		1.0707	9.56		1.0707	12.76
1.0715	36.6		1.0715	41.53		1.0715	9.52		1.0715	12.72
1.0723	36.55		1.0723	41.49		1.0723	9.48		1.0723	12.68
1.0731	36.5		1.0731	41.46		1.0731	9.44		1.0731	12.65
1.0739	36.44		1.0739	41.44		1.0739	9.4		1.0739	12.63
1.0747	36.4		1.0747	41.43		1.0747	9.37		1.0747	12.63
1.0755	36.38		1.0755	41.42		1.0755	9.34		1.0755	12.63
1.0763	36.36		1.0763	41.42		1.0763	9.31		1.0763	12.62
1.0771	36.31		1.0771	41.43		1.0771	9.29		1.0771	12.61
1.0779	36.24		1.0779	41.43		1.0779	9.27		1.0779	12.59
1.0787	36.15		1.0787	41.44		1.0787	9.25		1.0787	12.58
1.0795	36.07		1.0795	41.46		1.0795	9.23		1.0795	12.59
1.0803	36.02		1.0803	41.46		1.0803	9.21		1.0803	12.61
1.0811	35.98		1.0811	41.45		1.0811	9.19		1.0811	12.64
1.0819	35.96		1.0819	41.43		1.0819	9.17		1.0819	12.66
1.0827	35.91		1.0827	41.41		1.0827	9.14		1.0827	12.68
1.0835	35.85		1.0835	41.37		1.0835	9.12		1.0835	12.68
1.0843	35.79		1.0843	41.32		1.0843	9.1		1.0843	12.68
1.0851	35.73		1.0851	41.27		1.0851	9.08		1.0851	12.7
1.0859	35.69		1.0859	41.22		1.0859	9.07		1.0859	12.73
1.0867	35.68		1.0867	41.18		1.0867	9.06		1.0867	12.77
1.0875	35.69		1.0875	41.14		1.0875	9.05		1.0875	12.8
1.0883	35.74		1.0883	41.1		1.0883	9.04		1.0883	12.82
1.0891	35.83		1.0891	41.07		1.0891	9.02		1.0891	12.83
1.0899	35.92		1.0899	41.04		1.0899	9.01		1.0899	12.82
1.0907	35.99		1.0907	41.01		1.0907	9.01		1.0907	12.81
1.0915	36.05		1.0915	40.98		1.0915	9.01		1.0915	12.81
1.0923	36.13		1.0923	40.96		1.0923	9.01		1.0923	12.79
1.0931	36.21		1.0931	40.95		1.0931	9.01		1.0931	12.78
1.0938	36.31		1.0938	40.94		1.0938	9.01		1.0938	12.76
1.0946	36.44		1.0946	40.93		1.0946	9.01		1.0946	12.74
1.0954	36.56		1.0954	40.91		1.0954	9.01		1.0954	12.72
1.0962	36.67		1.0962	40.89		1.0962	9.01		1.0962	12.69
1.097	36.75		1.097	40.88		1.097	9.02		1.097	12.67
1.0978	36.8		1.0978	40.88		1.0978	9.03		1.0978	12.65
1.0986	36.86		1.0986	40.87		1.0986	9.04		1.0986	12.63
1.0994	36.92		1.0994	40.86		1.0994	9.04		1.0994	12.62
1.1002	36.99		1.1002	40.83		1.1002	9.04		1.1002	12.6
1.101	37.09		1.101	40.8		1.101	9.04		1.101	12.58
1.1018	37.2		1.1018	40.76		1.1018	9.04		1.1018	12.56
1.1026	37.31		1.1026	40.71		1.1026	9.03		1.1026	12.54
1.1034	37.42		1.1034	40.66		1.1034	9.02		1.1034	12.52
1.1042	37.5		1.1042	40.62		1.1042	9.02		1.1042	12.5
1.105	37.59		1.105	40.6		1.105	9.02		1.105	12.5
1.1058	37.69		1.1058	40.57		1.1058	9.02		1.1058	12.5
1.1066	37.79		1.1066	40.53		1.1066	9.02		1.1066	12.5
1.1074	37.89		1.1074	40.5		1.1074	9.02		1.1074	12.5
1.1082	37.98		1.1082	40.46		1.1082	9.02		1.1082	12.5
1.109	38.06		1.109	40.42		1.109	9.02		1.109	12.51
1.1098	38.11		1.1098	40.37		1.1098	9.01		1.1098	12.53
1.1106	38.15		1.1106	40.33		1.1106	9		1.1106	12.54
1.1114	38.17		1.1114	40.3		1.1114	9		1.1114	12.55
1.1122	38.2		1.1122	40.28		1.1122	8.99		1.1122	12.55
1.113	38.2		1.113	40.24		1.113	8.99		1.113	12.55
1.1138	38.19		1.1138	40.19		1.1138	8.99		1.1138	12.54
1.1146	38.17		1.1146	40.13		1.1146	8.99		1.1146	12.54
1.1154	38.16		1.1154	40.08		1.1154	8.98		1.1154	12.54
1.1162	38.16		1.1162	40.04		1.1162	8.97		1.1162	12.54
1.117	38.16		1.117	40.01		1.117	8.96		1.117	12.54
1.1178	38.17		1.1178	39.99		1.1178	8.96		1.1178	12.52
1.1185	38.19		1.1185	39.97		1.1185	8.96		1.1185	12.5
1.1193	38.21		1.1193	39.95		1.1193	8.96		1.1193	12.48
1.1201	38.26		1.1201	39.93		1.1201	8.96		1.1201	12.45
1.1209	38.32		1.1209	39.91		1.1209	8.96		1.1209	12.43
1.1217	38.4		1.1217	39.89		1.1217	8.95		1.1217	12.4
1.1225	38.46		1.1225	39.87		1.1225	8.94		1.1225	12.37
1.1233	38.52		1.1233	39.83		1.1233	8.92		1.1233	12.34
1.1241	38.6		1.1241	39.78		1.1241	8.9		1.1241	12.32
1.1249	38.7		1.1249	39.72		1.1249	8.89		1.1249	12.31
1.1257	38.83		1.1257	39.65		1.1257	8.89		1.1257	12.3
1.1265	38.94		1.1265	39.59		1.1265	8.88		1.1265	12.28
1.1273	39.04		1.1273	39.52		1.1273	8.87		1.1273	12.26
1.1281	39.15		1.1281	39.46		1.1281	8.86		1.1281	12.23
1.1289	39.26		1.1289	39.4		1.1289	8.85		1.1289	12.2
1.1297	39.34		1.1297	39.34		1.1297	8.84		1.1297	12.16
1.1305	39.4		1.1305	39.29		1.1305	8.84		1.1305	12.11
1.1313	39.45		1.1313	39.26		1.1313	8.84		1.1313	12.06
1.1321	39.52		1.1321	39.25		1.1321	8.83		1.1321	12
1.1329	39.59		1.1329	39.24		1.1329	8.82		1.1329	11.92
1.1337	39.69		1.1337	39.22		1.1337	8.81		1.1337	11.85
1.1345	39.81		1.1345	39.2		1.1345	8.8		1.1345	11.78
1.1353	39.93		1.1353	39.17		1.1353	8.79		1.1353	11.74
1.1361	40.06		1.1361	39.14		1.1361	8.78		1.1361	11.71
1.1369	40.18		1.1369	39.12		1.1369	8.77		1.1369	11.68
1.1377	40.28		1.1377	39.12		1.1377	8.76		1.1377	11.64
1.1385	40.37		1.1385	39.15		1.1385	8.75		1.1385	11.61
1.1393	40.44		1.1393	39.2		1.1393	8.74		1.1393	11.56
1.1401	40.5		1.1401	39.26		1.1401	8.73		1.1401	11.51
1.1409	40.54		1.1409	39.33		1.1409	8.72		1.1409	11.46
1.1417	40.58		1.1417	39.41		1.1417	8.71		1.1417	11.42
1.1424	40.61		1.1424	39.5		1.1424	8.7		1.1424	11.38
1.1432	40.65		1.1432	39.59		1.1432	8.69		1.1432	11.36
1.144	40.7		1.144	39.68		1.144	8.68		1.144	11.34
1.1448	40.77		1.1448	39.77		1.1448	8.67		1.1448	11.32
1.1456	40.85		1.1456	39.85		1.1456	8.66		1.1456	11.31
1.1464	40.93		1.1464	39.91		1.1464	8.65		1.1464	11.29
1.1472	41.02		1.1472	39.97		1.1472	8.65		1.1472	11.25
1.148	41.12		1.148	40.01		1.148	8.65		1.148	11.21
1.1488	41.22		1.1488	40.07		1.1488	8.64		1.1488	11.18
1.1496	41.31		1.1496	40.12		1.1496	8.63		1.1496	11.16
1.1504	41.42		1.1504	40.16		1.1504	8.62		1.1504	11.13
1.1512	41.52		1.1512	40.18		1.1512	8.61		1.1512	11.09
1.152	41.64		1.152	40.2		1.152	8.6		1.152	11.05
1.1528	41.77		1.1528	40.2		1.1528	8.59		1.1528	11.01
1.1536	41.93		1.1536	40.19		1.1536	8.58		1.1536	10.97
1.1544	42.1		1.1544	40.16		1.1544	8.57		1.1544	10.92
1.1552	42.27		1.1552	40.14		1.1552	8.56		1.1552	10.87
1.156	42.43		1.156	40.13		1.156	8.55		1.156	10.81
1.1568	42.59		1.1568	40.11		1.1568	8.54		1.1568	10.74
1.1576	42.75		1.1576	40.11		1.1576	8.53		1.1576	10.67
1.1584	42.9		1.1584	40.12		1.1584	8.52		1.1584	10.59
1.1592	43.03		1.1592	40.14		1.1592	8.51		1.1592	10.5
1.16	43.16		1.16	40.18		1.16	8.51		1.16	10.41
1.1608	43.28		1.1608	40.21		1.1608	8.5		1.1608	10.31
1.1616	43.38		1.1616	40.24		1.1616	8.49		1.1616	10.23
1.1624	43.49		1.1624	40.25		1.1624	8.49		1.1624	10.15
1.1632	43.58		1.1632	40.27		1.1632	8.49		1.1632	10.07
1.164	43.67		1.164	40.29		1.164	8.49		1.164	10
1.1648	43.76		1.1648	40.33		1.1648	8.49		1.1648	9.93
1.1656	43.85		1.1656	40.38		1.1656	8.49		1.1656	9.87
1.1663	43.91		1.1663	40.42		1.1663	8.49		1.1663	9.81
1.1671	43.95		1.1671	40.45		1.1671	8.49		1.1671	9.76
1.1679	43.95		1.1679	40.49		1.1679	8.49		1.1679	9.71
1.1687	43.93		1.1687	40.52		1.1687	8.5		1.1687	9.66
1.1695	43.91		1.1695	40.56		1.1695	8.49		1.1695	9.62
1.1703	43.9		1.1703	40.6		1.1703	8.48		1.1703	9.58
1.1711	43.89		1.1711	40.64		1.1711	8.47		1.1711	9.53
1.1719	43.85		1.1719	40.67		1.1719	8.46		1.1719	9.5
1.1727	43.8		1.1727	40.71		1.1727	8.45		1.1727	9.47
1.1735	43.74		1.1735	40.75		1.1735	8.44		1.1735	9.45
1.1743	43.67		1.1743	40.8		1.1743	8.43		1.1743	9.43
1.1751	43.62		1.1751	40.85		1.1751	8.42		1.1751	9.41
1.1759	43.58		1.1759	40.91		1.1759	8.41		1.1759	9.4
1.1767	43.59		1.1767	40.96		1.1767	8.4		1.1767	9.39
1.1775	43.63		1.1775	41.01		1.1775	8.39		1.1775	9.38
1.1783	43.67		1.1783	41.06		1.1783	8.38		1.1783	9.37
1.1791	43.73		1.1791	41.1		1.1791	8.38		1.1791	9.36
1.1799	43.79		1.1799	41.12		1.1799	8.38		1.1799	9.36
1.1807	43.84		1.1807	41.11		1.1807	8.38		1.1807	9.36
1.1815	43.89		1.1815	41.09		1.1815	8.38		1.1815	9.36
1.1823	43.93		1.1823	41.06		1.1823	8.39		1.1823	9.36
1.1831	43.96		1.1831	41.04		1.1831	8.4		1.1831	9.35
1.1839	43.99		1.1839	41.02		1.1839	8.4		1.1839	9.34
1.1847	44.02		1.1847	41		1.1847	8.39		1.1847	9.32
1.1855	44.05		1.1855	40.99		1.1855	8.38		1.1855	9.3
1.1863	44.07		1.1863	40.98		1.1863	8.37		1.1863	9.28
1.1871	44.08		1.1871	40.96		1.1871	8.37		1.1871	9.26
1.1879	44.08		1.1879	40.95		1.1879	8.37		1.1879	9.24
1.1887	44.09		1.1887	40.94		1.1887	8.37		1.1887	9.21
1.1895	44.11		1.1895	40.93		1.1895	8.38		1.1895	9.17
1.1902	44.14		1.1902	40.92		1.1902	8.38		1.1902	9.13
1.191	44.2		1.191	40.9		1.191	8.38		1.191	9.09
1.1918	44.24		1.1918	40.88		1.1918	8.38		1.1918	9.06
1.1926	44.29		1.1926	40.87		1.1926	8.38		1.1926	9.03
1.1934	44.35		1.1934	40.87		1.1934	8.38		1.1934	9.02
1.1942	44.4		1.1942	40.88		1.1942	8.38		1.1942	9.01
1.195	44.43		1.195	40.9		1.195	8.39		1.195	9
1.1958	44.46		1.1958	40.93		1.1958	8.4		1.1958	8.99
1.1966	44.49		1.1966	40.96		1.1966	8.4		1.1966	8.97
1.1974	44.53		1.1974	40.98		1.1974	8.4		1.1974	8.96
1.1982	44.58		1.1982	40.97		1.1982	8.39		1.1982	8.95
1.199	44.64		1.199	40.96		1.199	8.38		1.199	8.94
1.1998	44.69		1.1998	40.94		1.1998	8.37		1.1998	8.94
1.2006	44.73		1.2006	40.91		1.2006	8.36		1.2006	8.93
1.2014	44.78		1.2014	40.88		1.2014	8.35		1.2014	8.93
1.2022	44.83		1.2022	40.85		1.2022	8.34		1.2022	8.93
1.203	44.89		1.203	40.83		1.203	8.34		1.203	8.94
1.2038	44.92		1.2038	40.82		1.2038	8.35		1.2038	8.95
1.2046	44.93		1.2046	40.81		1.2046	8.36		1.2046	8.94
1.2054	44.94		1.2054	40.81		1.2054	8.36		1.2054	8.93
1.2062	44.93		1.2062	40.8		1.2062	8.37		1.2062	8.92
1.207	44.89		1.207	40.79		1.207	8.38		1.207	8.91
1.2078	44.84		1.2078	40.78		1.2078	8.39		1.2078	8.9
1.2086	44.78		1.2086	40.77		1.2086	8.4		1.2086	8.89
1.2094	44.73		1.2094	40.77		1.2094	8.4		1.2094	8.88
1.2102	44.7		1.2102	40.78		1.2102	8.39		1.2102	8.88
1.211	44.69		1.211	40.79		1.211	8.39		1.211	8.88
1.2118	44.67		1.2118	40.8		1.2118	8.4		1.2118	8.88
1.2126	44.65		1.2126	40.83		1.2126	8.41		1.2126	8.89
1.2134	44.62		1.2134	40.86		1.2134	8.42		1.2134	8.9
1.2141	44.57		1.2141	40.89		1.2141	8.43		1.2141	8.92
1.2149	44.51		1.2149	40.91		1.2149	8.45		1.2149	8.92
1.2157	44.43		1.2157	40.92		1.2157	8.47		1.2157	8.93
1.2165	44.34		1.2165	40.91		1.2165	8.49		1.2165	8.94
1.2173	44.23		1.2173	40.87		1.2173	8.51		1.2173	8.94
1.2181	44.11		1.2181	40.79		1.2181	8.52		1.2181	8.93
1.2189	44		1.2189	40.68		1.2189	8.53		1.2189	8.93
1.2197	43.92		1.2197	40.57		1.2197	8.54		1.2197	8.94
1.2205	43.85		1.2205	40.45		1.2205	8.55		1.2205	8.95
1.2213	43.78		1.2213	40.31		1.2213	8.56		1.2213	8.95
1.2221	43.71		1.2221	40.16		1.2221	8.57		1.2221	8.95
1.2229	43.65		1.2229	40.01		1.2229	8.58		1.2229	8.94
1.2237	43.59		1.2237	39.86		1.2237	8.59		1.2237	8.93
1.2245	43.53		1.2245	39.72		1.2245	8.6		1.2245	8.91
1.2253	43.45		1.2253	39.59		1.2253	8.61		1.2253	8.89
1.2261	43.36		1.2261	39.47		1.2261	8.62		1.2261	8.88
1.2269	43.25		1.2269	39.36		1.2269	8.63		1.2269	8.9
1.2277	43.14		1.2277	39.26		1.2277	8.64		1.2277	8.92
1.2285	43.04		1.2285	39.16		1.2285	8.65		1.2285	8.94
1.2293	42.95		1.2293	39.07		1.2293	8.66		1.2293	8.96
1.2301	42.87		1.2301	39		1.2301	8.68		1.2301	8.98
1.2309	42.79		1.2309	38.94		1.2309	8.7		1.2309	9.01
1.2317	42.71		1.2317	38.88		1.2317	8.71		1.2317	9.04
1.2325	42.62		1.2325	38.83		1.2325	8.72		1.2325	9.07
1.2333	42.51		1.2333	38.78		1.2333	8.73		1.2333	9.1
1.2341	42.39		1.2341	38.74		1.2341	8.74		1.2341	9.13
1.2349	42.28		1.2349	38.7		1.2349	8.75		1.2349	9.16
1.2357	42.19		1.2357	38.66		1.2357	8.76		1.2357	9.2
1.2365	42.1		1.2365	38.63		1.2365	8.77		1.2365	9.24
1.2373	42.04		1.2373	38.6		1.2373	8.78		1.2373	9.28
1.238	41.98		1.238	38.57		1.238	8.79		1.238	9.32
1.2388	41.94		1.2388	38.54		1.2388	8.8		1.2388	9.36
1.2396	41.89		1.2396	38.5		1.2396	8.8		1.2396	9.4
1.2404	41.83		1.2404	38.48		1.2404	8.8		1.2404	9.44
1.2412	41.76		1.2412	38.47		1.2412	8.8		1.2412	9.46
1.242	41.69		1.242	38.49		1.242	8.8		1.242	9.49
1.2428	41.63		1.2428	38.52		1.2428	8.8		1.2428	9.53
1.2436	41.58		1.2436	38.57		1.2436	8.8		1.2436	9.57
1.2444	41.53		1.2444	38.63		1.2444	8.81		1.2444	9.62
1.2452	41.5		1.2452	38.7		1.2452	8.81		1.2452	9.66
1.246	41.49		1.246	38.78		1.246	8.81		1.246	9.71
1.2468	41.5		1.2468	38.87		1.2468	8.81		1.2468	9.76
1.2476	41.51		1.2476	38.97		1.2476	8.83		1.2476	9.81
1.2484	41.52		1.2484	39.07		1.2484	8.87		1.2484	9.85
1.2492	41.53		1.2492	39.14		1.2492	8.93		1.2492	9.88
1.25	41.53		1.25	39.18		1.25	8.96		1.25	9.91
1.2508	41.56		1.2508	39.18		1.2508	8.97		1.2508	9.94
1.2516	41.6		1.2516	39.17		1.2516	8.98		1.2516	9.97
1.2524	41.66		1.2524	39.13		1.2524	8.99		1.2524	10
1.2532	41.72		1.2532	39.08		1.2532	9		1.2532	10.03
1.254	41.78		1.254	39.02		1.254	9.01		1.254	10.05
1.2548	41.84		1.2548	38.95		1.2548	9.02		1.2548	10.06
1.2556	41.91		1.2556	38.87		1.2556	9.03		1.2556	10.07
1.2564	41.95		1.2564	38.79		1.2564	9.03		1.2564	10.08
1.2572	41.96		1.2572	38.7		1.2572	9.03		1.2572	10.09
1.258	41.93		1.258	38.61		1.258	9.02		1.258	10.1
1.2588	41.86		1.2588	38.52		1.2588	9.01		1.2588	10.1
1.2596	41.78		1.2596	38.45		1.2596	9		1.2596	10.1
1.2604	41.69		1.2604	38.39		1.2604	8.99		1.2604	10.1
1.2612	41.59		1.2612	38.33		1.2612	8.98		1.2612	10.1
1.262	41.5		1.262	38.28		1.262	8.97		1.262	10.1
1.2627	41.44		1.2627	38.23		1.2627	8.97		1.2627	10.11
1.2635	41.41		1.2635	38.18		1.2635	8.97		1.2635	10.12
1.2643	41.38		1.2643	38.13		1.2643	8.97		1.2643	10.14
1.2651	41.34		1.2651	38.1		1.2651	8.99		1.2651	10.16
1.2659	41.29		1.2659	38.08		1.2659	9.01		1.2659	10.18
1.2667	41.23		1.2667	38.09		1.2667	9.01		1.2667	10.2
1.2675	41.17		1.2675	38.12		1.2675	9.01		1.2675	10.22
1.2683	41.1		1.2683	38.17		1.2683	9.01		1.2683	10.23
1.2691	41.04		1.2691	38.24		1.2691	9.01		1.2691	10.24
1.2699	40.96		1.2699	38.33		1.2699	9.01		1.2699	10.25
1.2707	40.88		1.2707	38.41		1.2707	9.01		1.2707	10.26
1.2715	40.79		1.2715	38.49		1.2715	9.01		1.2715	10.27
1.2723	40.69		1.2723	38.56		1.2723	9.01		1.2723	10.28
1.2731	40.57		1.2731	38.62		1.2731	9.01		1.2731	10.28
1.2739	40.45		1.2739	38.67		1.2739	9.01		1.2739	10.28
1.2747	40.34		1.2747	38.7		1.2747	9.01		1.2747	10.28
1.2755	40.23		1.2755	38.71		1.2755	9.01		1.2755	10.28
1.2763	40.11		1.2763	38.72		1.2763	9.02		1.2763	10.29
1.2771	39.99		1.2771	38.75		1.2771	9.02		1.2771	10.29
1.2779	39.84		1.2779	38.83		1.2779	9.03		1.2779	10.3
1.2787	39.68		1.2787	38.94		1.2787	9.04		1.2787	10.31
1.2795	39.53		1.2795	39.07		1.2795	9.05		1.2795	10.31
1.2803	39.39		1.2803	39.22		1.2803	9.06		1.2803	10.31
1.2811	39.24		1.2811	39.37		1.2811	9.07		1.2811	10.31
1.2819	39.12		1.2819	39.52		1.2819	9.08		1.2819	10.31
1.2827	39.01		1.2827	39.66		1.2827	9.09		1.2827	10.3
1.2835	38.92		1.2835	39.79		1.2835	9.09		1.2835	10.3
1.2843	38.84		1.2843	39.91		1.2843	9.09		1.2843	10.31
1.2851	38.76		1.2851	40		1.2851	9.09		1.2851	10.32
1.2859	38.67		1.2859	40.09		1.2859	9.08		1.2859	10.33
1.2866	38.57		1.2866	40.18		1.2866	9.08		1.2866	10.35
1.2874	38.48		1.2874	40.26		1.2874	9.08		1.2874	10.37
1.2882	38.39		1.2882	40.34		1.2882	9.08		1.2882	10.39
1.289	38.32		1.289	40.4		1.289	9.08		1.289	10.41
1.2898	38.25		1.2898	40.43		1.2898	9.08		1.2898	10.43
1.2906	38.19		1.2906	40.44		1.2906	9.08		1.2906	10.45
1.2914	38.14		1.2914	40.44		1.2914	9.08		1.2914	10.47
1.2922	38.11		1.2922	40.43		1.2922	9.08		1.2922	10.48
1.293	38.09		1.293	40.42		1.293	9.08		1.293	10.49
1.2938	38.07		1.2938	40.41		1.2938	9.08		1.2938	10.49
1.2946	38.06		1.2946	40.4		1.2946	9.07		1.2946	10.5
1.2954	38.05		1.2954	40.4		1.2954	9.07		1.2954	10.5
1.2962	38.05		1.2962	40.41		1.2962	9.07		1.2962	10.5
1.297	38.06		1.297	40.44		1.297	9.07		1.297	10.51
1.2978	38.07		1.2978	40.49		1.2978	9.07		1.2978	10.52
1.2986	38.08		1.2986	40.57		1.2986	9.07		1.2986	10.53
1.2994	38.06		1.2994	40.65		1.2994	9.07		1.2994	10.53
1.3002	38.04		1.3002	40.76		1.3002	9.07		1.3002	10.54
1.301	38.02		1.301	40.89		1.301	9.07		1.301	10.55
1.3018	37.99		1.3018	41.04		1.3018	9.07		1.3018	10.56
1.3026	37.93		1.3026	41.2		1.3026	9.07		1.3026	10.58
1.3034	37.85		1.3034	41.36		1.3034	9.07		1.3034	10.61
1.3042	37.76		1.3042	41.5		1.3042	9.07		1.3042	10.64
1.305	37.69		1.305	41.65		1.305	9.07		1.305	10.66
1.3058	37.62		1.3058	41.79		1.3058	9.07		1.3058	10.69
1.3066	37.56		1.3066	41.92		1.3066	9.07		1.3066	10.7
1.3074	37.49		1.3074	42.06		1.3074	9.07		1.3074	10.71
1.3082	37.42		1.3082	42.18		1.3082	9.07		1.3082	10.71
1.309	37.36		1.309	42.29		1.309	9.07		1.309	10.71
1.3098	37.29		1.3098	42.37		1.3098	9.06		1.3098	10.72
1.3105	37.24		1.3105	42.44		1.3105	9.05		1.3105	10.74
1.3113	37.19		1.3113	42.5		1.3113	9.05		1.3113	10.76
1.3121	37.14		1.3121	42.56		1.3121	9.05		1.3121	10.77
1.3129	37.1		1.3129	42.61		1.3129	9.05		1.3129	10.78
1.3137	37.06		1.3137	42.65		1.3137	9.05		1.3137	10.78
1.3145	37		1.3145	42.68		1.3145	9.05		1.3145	10.78
1.3153	36.95		1.3153	42.7		1.3153	9.05		1.3153	10.78
1.3161	36.91		1.3161	42.72		1.3161	9.05		1.3161	10.78
1.3169	36.85		1.3169	42.73		1.3169	9.04		1.3169	10.77
1.3177	36.81		1.3177	42.74		1.3177	9.03		1.3177	10.76
1.3185	36.76		1.3185	42.75		1.3185	9.02		1.3185	10.75
1.3193	36.71		1.3193	42.76		1.3193	9.01		1.3193	10.74
1.3201	36.68		1.3201	42.76		1.3201	9.01		1.3201	10.74
1.3209	36.68		1.3209	42.76		1.3209	9.01		1.3209	10.75
1.3217	36.68		1.3217	42.76		1.3217	9.01		1.3217	10.75
1.3225	36.66		1.3225	42.75		1.3225	9.01		1.3225	10.75
1.3233	36.61		1.3233	42.73		1.3233	9.01		1.3233	10.75
1.3241	36.56		1.3241	42.69		1.3241	9		1.3241	10.74
1.3249	36.5		1.3249	42.65		1.3249	9		1.3249	10.74
1.3257	36.43		1.3257	42.61		1.3257	9		1.3257	10.73
1.3265	36.35		1.3265	42.57		1.3265	9		1.3265	10.72
1.3273	36.29		1.3273	42.51		1.3273	8.98		1.3273	10.71
1.3281	36.23		1.3281	42.44		1.3281	8.93		1.3281	10.71
1.3289	36.17		1.3289	42.38		1.3289	8.88		1.3289	10.71
1.3297	36.1		1.3297	42.34		1.3297	8.85		1.3297	10.71
1.3305	36		1.3305	42.33		1.3305	8.84		1.3305	10.72
1.3313	35.9		1.3313	42.34		1.3313	8.84		1.3313	10.73
1.3321	35.78		1.3321	42.37		1.3321	8.83		1.3321	10.74
1.3329	35.66		1.3329	42.41		1.3329	8.82		1.3329	10.76
1.3337	35.52		1.3337	42.45		1.3337	8.82		1.3337	10.78
1.3344	35.38		1.3344	42.49		1.3344	8.82		1.3344	10.81
1.3352	35.24		1.3352	42.52		1.3352	8.82		1.3352	10.84
1.336	35.11		1.336	42.55		1.336	8.82		1.336	10.87
1.3368	35.01		1.3368	42.57		1.3368	8.81		1.3368	10.9
1.3376	34.94		1.3376	42.6		1.3376	8.81		1.3376	10.93
1.3384	34.88		1.3384	42.64		1.3384	8.81		1.3384	10.98
1.3392	34.81		1.3392	42.69		1.3392	8.81		1.3392	11.03
1.34	34.73		1.34	42.76		1.34	8.81		1.34	11.08
1.3408	34.64		1.3408	42.84		1.3408	8.82		1.3408	11.12
1.3416	34.55		1.3416	42.92		1.3416	8.83		1.3416	11.16
1.3424	34.45		1.3424	43		1.3424	8.83		1.3424	11.19
1.3432	34.34		1.3432	43.08		1.3432	8.83		1.3432	11.22
1.344	34.26		1.344	43.16		1.344	8.83		1.344	11.24
1.3448	34.2		1.3448	43.22		1.3448	8.81		1.3448	11.26
1.3456	34.17		1.3456	43.28		1.3456	8.79		1.3456	11.28
1.3464	34.18		1.3464	43.31		1.3464	8.78		1.3464	11.29
1.3472	34.22		1.3472	43.32		1.3472	8.77		1.3472	11.3
1.348	34.25		1.348	43.31		1.348	8.76		1.348	11.32
1.3488	34.28		1.3488	43.28		1.3488	8.75		1.3488	11.35
1.3496	34.29		1.3496	43.24		1.3496	8.74		1.3496	11.38
1.3504	34.27		1.3504	43.21		1.3504	8.73		1.3504	11.41
1.3512	34.24		1.3512	43.18		1.3512	8.72		1.3512	11.43
1.352	34.22		1.352	43.15		1.352	8.71		1.352	11.45
1.3528	34.21		1.3528	43.12		1.3528	8.7		1.3528	11.47
1.3536	34.21		1.3536	43.1		1.3536	8.69		1.3536	11.49
1.3544	34.22		1.3544	43.09		1.3544	8.68		1.3544	11.51
1.3552	34.24		1.3552	43.08		1.3552	8.68		1.3552	11.53
1.356	34.27		1.356	43.06		1.356	8.67		1.356	11.55
1.3568	34.28		1.3568	43.03		1.3568	8.66		1.3568	11.58
1.3576	34.3		1.3576	42.98		1.3576	8.65		1.3576	11.6
1.3583	34.31		1.3583	42.9		1.3583	8.64		1.3583	11.62
1.3591	34.3		1.3591	42.81		1.3591	8.63		1.3591	11.64
1.3599	34.28		1.3599	42.71		1.3599	8.62		1.3599	11.66
1.3607	34.25		1.3607	42.61		1.3607	8.62		1.3607	11.68
1.3615	34.19		1.3615	42.51		1.3615	8.62		1.3615	11.7
1.3623	34.11		1.3623	42.42		1.3623	8.62		1.3623	11.73
1.3631	34.02		1.3631	42.34		1.3631	8.61		1.3631	11.75
1.3639	33.93		1.3639	42.28		1.3639	8.6		1.3639	11.77
1.3647	33.84		1.3647	42.24		1.3647	8.59		1.3647	11.8
1.3655	33.76		1.3655	42.19		1.3655	8.59		1.3655	11.84
1.3663	33.7		1.3663	42.14		1.3663	8.58		1.3663	11.88
1.3671	33.64		1.3671	42.1		1.3671	8.58		1.3671	11.92
1.3679	33.59		1.3679	42.05		1.3679	8.58		1.3679	11.96
1.3687	33.53		1.3687	42.02		1.3687	8.57		1.3687	12
1.3695	33.47		1.3695	42.01		1.3695	8.56		1.3695	12.06
1.3703	33.4		1.3703	42.02		1.3703	8.56		1.3703	12.12
1.3711	33.33		1.3711	42.05		1.3711	8.56		1.3711	12.19
1.3719	33.25		1.3719	42.08		1.3719	8.55		1.3719	12.27
1.3727	33.18		1.3727	42.11		1.3727	8.54		1.3727	12.34
1.3735	33.1		1.3735	42.12		1.3735	8.54		1.3735	12.41
1.3743	33.01		1.3743	42.12		1.3743	8.54		1.3743	12.47
1.3751	32.92		1.3751	42.11		1.3751	8.53		1.3751	12.53
1.3759	32.83		1.3759	42.09		1.3759	8.52		1.3759	12.59
1.3767	32.74		1.3767	42.07		1.3767	8.5		1.3767	12.65
1.3775	32.66		1.3775	42.05		1.3775	8.5		1.3775	12.7
1.3783	32.58		1.3783	42.02		1.3783	8.51		1.3783	12.75
1.3791	32.52		1.3791	41.99		1.3791	8.52		1.3791	12.8
1.3799	32.46		1.3799	41.94		1.3799	8.53		1.3799	12.84
1.3807	32.39		1.3807	41.88		1.3807	8.53		1.3807	12.88
1.3815	32.33		1.3815	41.8		1.3815	8.53		1.3815	12.92
1.3822	32.3		1.3822	41.71		1.3822	8.53		1.3822	12.95
1.383	32.28		1.383	41.64		1.383	8.52		1.383	12.97
1.3838	32.27		1.3838	41.6		1.3838	8.51		1.3838	12.98
1.3846	32.25		1.3846	41.57		1.3846	8.51		1.3846	12.99
1.3854	32.22		1.3854	41.59		1.3854	8.52		1.3854	12.99
1.3862	32.19		1.3862	41.64		1.3862	8.53		1.3862	12.99
1.387	32.17		1.387	41.71		1.387	8.54		1.387	13
1.3878	32.15		1.3878	41.83		1.3878	8.55		1.3878	13.01
1.3886	32.13		1.3886	41.98		1.3886	8.56		1.3886	13.02
1.3894	32.12		1.3894	42.16		1.3894	8.57		1.3894	13.03
1.3902	32.11		1.3902	42.38		1.3902	8.58		1.3902	13.03
1.391	32.1		1.391	42.63		1.391	8.59		1.391	13.03
1.3918	32.09		1.3918	42.89		1.3918	8.6		1.3918	13.05
1.3926	32.08		1.3926	43.16		1.3926	8.61		1.3926	13.06
1.3934	32.06		1.3934	43.43		1.3934	8.62		1.3934	13.07
1.3942	32.05		1.3942	43.69		1.3942	8.63		1.3942	13.07
1.395	32.01		1.395	43.93		1.395	8.64		1.395	13.07
1.3958	31.96		1.3958	44.16		1.3958	8.65		1.3958	13.08
1.3966	31.9		1.3966	44.39		1.3966	8.67		1.3966	13.1
1.3974	31.83		1.3974	44.61		1.3974	8.69		1.3974	13.12
1.3982	31.75		1.3982	44.82		1.3982	8.71		1.3982	13.14
1.399	31.68		1.399	45.01		1.399	8.74		1.399	13.15
1.3998	31.61		1.3998	45.18		1.3998	8.77		1.3998	13.15
1.4006	31.53		1.4006	45.33		1.4006	8.8		1.4006	13.14
1.4014	31.46		1.4014	45.45		1.4014	8.83		1.4014	13.13
1.4022	31.41		1.4022	45.56		1.4022	8.85		1.4022	13.12
1.403	31.37		1.403	45.66		1.403	8.87		1.403	13.11
1.4038	31.34		1.4038	45.75		1.4038	8.89		1.4038	13.1
1.4046	31.31		1.4046	45.82		1.4046	8.9		1.4046	13.09
1.4054	31.27		1.4054	45.87		1.4054	8.92		1.4054	13.08
1.4062	31.24		1.4062	45.91		1.4062	8.94		1.4062	13.08
1.4069	31.2		1.4069	45.94		1.4069	8.96		1.4069	13.09
1.4077	31.17		1.4077	45.96		1.4077	9.01		1.4077	13.1
1.4085	31.15		1.4085	45.97		1.4085	9.05		1.4085	13.1
1.4093	31.15		1.4093	45.97		1.4093	9.1		1.4093	13.11
1.4101	31.17		1.4101	45.96		1.4101	9.16		1.4101	13.11
1.4109	31.21		1.4109	45.94		1.4109	9.22		1.4109	13.11
1.4117	31.26		1.4117	45.92		1.4117	9.28		1.4117	13.11
1.4125	31.31		1.4125	45.9		1.4125	9.33		1.4125	13.1
1.4133	31.35		1.4133	45.89		1.4133	9.36		1.4133	13.1
1.4141	31.38		1.4141	45.9		1.4141	9.38		1.4141	13.09
1.4149	31.41		1.4149	45.93		1.4149	9.4		1.4149	13.07
1.4157	31.44		1.4157	45.99		1.4157	9.42		1.4157	13.05
1.4165	31.46		1.4165	46.08		1.4165	9.45		1.4165	13.03
1.4173	31.49		1.4173	46.17		1.4173	9.48		1.4173	13.01
1.4181	31.53		1.4181	46.25		1.4181	9.52		1.4181	12.97
1.4189	31.58		1.4189	46.33		1.4189	9.56		1.4189	12.93
1.4197	31.63		1.4197	46.37		1.4197	9.6		1.4197	12.88
1.4205	31.69		1.4205	46.39		1.4205	9.62		1.4205	12.84
1.4213	31.74		1.4213	46.4		1.4213	9.65		1.4213	12.8
1.4221	31.78		1.4221	46.41		1.4221	9.68		1.4221	12.78
1.4229	31.81		1.4229	46.42		1.4229	9.71		1.4229	12.76
1.4237	31.82		1.4237	46.44		1.4237	9.75		1.4237	12.74
1.4245	31.81		1.4245	46.47		1.4245	9.8		1.4245	12.71
1.4253	31.78		1.4253	46.5		1.4253	9.84		1.4253	12.68
1.4261	31.73		1.4261	46.54		1.4261	9.87		1.4261	12.66
1.4269	31.66		1.4269	46.59		1.4269	9.91		1.4269	12.64
1.4277	31.62		1.4277	46.66		1.4277	9.94		1.4277	12.62
1.4285	31.57		1.4285	46.75		1.4285	9.96		1.4285	12.59
1.4293	31.56		1.4293	46.84		1.4293	9.98		1.4293	12.56
1.4301	31.57		1.4301	46.94		1.4301	9.99		1.4301	12.53
1.4308	31.61		1.4308	47.01		1.4308	10		1.4308	12.51
1.4316	31.65		1.4316	47.07		1.4316	10		1.4316	12.49
1.4324	31.7		1.4324	47.13		1.4324	10		1.4324	12.47
1.4332	31.74		1.4332	47.2		1.4332	10		1.4332	12.45
1.434	31.79		1.434	47.29		1.434	10		1.434	12.43
1.4348	31.83		1.4348	47.41		1.4348	9.99		1.4348	12.41
1.4356	31.88		1.4356	47.55		1.4356	9.99		1.4356	12.39
1.4364	31.93		1.4364	47.7		1.4364	9.99		1.4364	12.37
1.4372	31.98		1.4372	47.86		1.4372	9.99		1.4372	12.35
1.438	32.03		1.438	48.05		1.438	9.99		1.438	12.32
1.4388	32.07		1.4388	48.25		1.4388	9.99		1.4388	12.29
1.4396	32.11		1.4396	48.45		1.4396	9.99		1.4396	12.26
1.4404	32.15		1.4404	48.64		1.4404	9.98		1.4404	12.22
1.4412	32.2		1.4412	48.81		1.4412	9.97		1.4412	12.18
1.442	32.26		1.442	48.95		1.442	9.96		1.442	12.14
1.4428	32.32		1.4428	49.06		1.4428	9.96		1.4428	12.1
1.4436	32.37		1.4436	49.14		1.4436	9.96		1.4436	12.06
1.4444	32.42		1.4444	49.22		1.4444	9.96		1.4444	12.01
1.4452	32.49		1.4452	49.31		1.4452	9.96		1.4452	11.95
1.446	32.58		1.446	49.4		1.446	9.96		1.446	11.88
1.4468	32.67		1.4468	49.48		1.4468	9.95		1.4468	11.81
1.4476	32.77		1.4476	49.55		1.4476	9.94		1.4476	11.74
1.4484	32.87		1.4484	49.6		1.4484	9.94		1.4484	11.68
1.4492	32.97		1.4492	49.62		1.4492	9.94		1.4492	11.6
1.45	33.08		1.45	49.62		1.45	9.94		1.45	11.52
1.4508	33.18		1.4508	49.6		1.4508	9.93		1.4508	11.43
1.4516	33.28		1.4516	49.59		1.4516	9.94		1.4516	11.33
1.4524	33.36		1.4524	49.59		1.4524	9.95		1.4524	11.24
1.4532	33.44		1.4532	49.63		1.4532	9.95		1.4532	11.15
1.454	33.52		1.454	49.71		1.454	9.95		1.454	11.08
1.4547	33.59		1.4547	49.83		1.4547	9.94		1.4547	11.01
1.4555	33.65		1.4555	49.99		1.4555	9.93		1.4555	10.94
1.4563	33.73		1.4563	50.17		1.4563	9.93		1.4563	10.87
1.4571	33.8		1.4571	50.36		1.4571	9.93		1.4571	10.81
1.4579	33.87		1.4579	50.55		1.4579	9.92		1.4579	10.74
1.4587	33.93		1.4587	50.74		1.4587	9.91		1.4587	10.67
1.4595	33.98		1.4595	50.92		1.4595	9.9		1.4595	10.59
1.4603	34.04		1.4603	51.1		1.4603	9.9		1.4603	10.51
1.4611	34.09		1.4611	51.27		1.4611	9.9		1.4611	10.43
1.4619	34.12		1.4619	51.44		1.4619	9.9		1.4619	10.35
1.4627	34.14		1.4627	51.57		1.4627	9.91		1.4627	10.27
1.4635	34.16		1.4635	51.66		1.4635	9.92		1.4635	10.2
1.4643	34.18		1.4643	51.72		1.4643	9.93		1.4643	10.13
1.4651	34.22		1.4651	51.73		1.4651	9.93		1.4651	10.06
1.4659	34.25		1.4659	51.72		1.4659	9.93		1.4659	10
1.4667	34.28		1.4667	51.69		1.4667	9.92		1.4667	9.94
1.4675	34.31		1.4675	51.62		1.4675	9.91		1.4675	9.88
1.4683	34.33		1.4683	51.51		1.4683	9.9		1.4683	9.83
1.4691	34.34		1.4691	51.36		1.4691	9.9		1.4691	9.77
1.4699	34.36		1.4699	51.17		1.4699	9.9		1.4699	9.72
1.4707	34.37		1.4707	50.95		1.4707	9.9		1.4707	9.67
1.4715	34.39		1.4715	50.72		1.4715	9.9		1.4715	9.63
1.4723	34.4		1.4723	50.49		1.4723	9.9		1.4723	9.63
1.4731	34.42		1.4731	50.28		1.4731	9.9		1.4731	9.66
1.4739	34.42		1.4739	50.09		1.4739	9.9		1.4739	9.71
1.4747	34.42		1.4747	49.94		1.4747	9.9		1.4747	9.75
1.4755	34.43		1.4755	49.8		1.4755	9.91		1.4755	9.76
1.4763	34.44		1.4763	49.67		1.4763	9.92		1.4763	9.74
1.4771	34.45		1.4771	49.56		1.4771	9.93		1.4771	9.7
1.4779	34.46		1.4779	49.48		1.4779	9.93		1.4779	9.66
1.4786	34.46		1.4786	49.44		1.4786	9.92		1.4786	9.62
1.4794	34.47		1.4794	49.45		1.4794	9.91		1.4794	9.58
1.4802	34.49		1.4802	49.51		1.4802	9.9		1.4802	9.54
1.481	34.52		1.481	49.62		1.481	9.89		1.481	9.51
1.4818	34.56		1.4818	49.75		1.4818	9.89		1.4818	9.48
1.4826	34.61		1.4826	49.89		1.4826	9.89		1.4826	9.46
1.4834	34.67		1.4834	50.03		1.4834	9.89		1.4834	9.45
1.4842	34.75		1.4842	50.15		1.4842	9.89		1.4842	9.46
1.485	34.84		1.485	50.27		1.485	9.88		1.485	9.49
1.4858	34.93		1.4858	50.38		1.4858	9.86		1.4858	9.53
1.4866	35.02		1.4866	50.5		1.4866	9.84		1.4866	9.56
1.4874	35.1		1.4874	50.63		1.4874	9.81		1.4874	9.57
1.4882	35.16		1.4882	50.75		1.4882	9.78		1.4882	9.57
1.489	35.22		1.489	50.86		1.489	9.75		1.489	9.55
1.4898	35.27		1.4898	50.98		1.4898	9.71		1.4898	9.52
1.4906	35.3		1.4906	51.1		1.4906	9.66		1.4906	9.49
1.4914	35.3		1.4914	51.24		1.4914	9.63		1.4914	9.46
1.4922	35.29		1.4922	51.4		1.4922	9.6		1.4922	9.43
1.493	35.27		1.493	51.56		1.493	9.59		1.493	9.4
1.4938	35.24		1.4938	51.71		1.4938	9.58		1.4938	9.38
1.4946	35.2		1.4946	51.83		1.4946	9.57		1.4946	9.37
1.4954	35.16		1.4954	51.91		1.4954	9.57		1.4954	9.37
1.4962	35.12		1.4962	51.96		1.4962	9.56		1.4962	9.37
1.497	35.07		1.497	51.99		1.497	9.55		1.497	9.37
1.4978	35.01		1.4978	52.02		1.4978	9.53		1.4978	9.38
1.4986	34.95		1.4986	52.03		1.4986	9.5		1.4986	9.38
1.4994	34.9		1.4994	52.04		1.4994	9.47		1.4994	9.39
1.5002	34.84		1.5002	52.05		1.5002	9.45		1.5002	9.4
1.501	34.78		1.501	52.07		1.501	9.42		1.501	9.41
1.5018	34.72		1.5018	52.1		1.5018	9.39		1.5018	9.41
1.5025	34.66		1.5025	52.14		1.5025	9.36		1.5025	9.41
1.5033	34.61		1.5033	52.2		1.5033	9.33		1.5033	9.41
1.5041	34.57		1.5041	52.3		1.5041	9.29		1.5041	9.42
1.5049	34.53		1.5049	52.43		1.5049	9.26		1.5049	9.43
1.5057	34.48		1.5057	52.61		1.5057	9.23		1.5057	9.44
1.5065	34.42		1.5065	52.82		1.5065	9.19		1.5065	9.45
1.5073	34.34		1.5073	53.06		1.5073	9.16		1.5073	9.47
1.5081	34.26		1.5081	53.31		1.5081	9.14		1.5081	9.49
1.5089	34.18		1.5089	53.56		1.5089	9.13		1.5089	9.51
1.5097	34.1		1.5097	53.8		1.5097	9.13		1.5097	9.54
1.5105	34.02		1.5105	54.07		1.5105	9.13		1.5105	9.57
1.5113	33.95		1.5113	54.36		1.5113	9.14		1.5113	9.6
1.5121	33.89		1.5121	54.65		1.5121	9.15		1.5121	9.63
1.5129	33.85		1.5129	54.93		1.5129	9.16		1.5129	9.67
1.5137	33.84		1.5137	55.19		1.5137	9.17		1.5137	9.72
1.5145	33.84		1.5145	55.42		1.5145	9.18		1.5145	9.77
1.5153	33.82		1.5153	55.62		1.5153	9.19		1.5153	9.81
1.5161	33.79		1.5161	55.79		1.5161	9.2		1.5161	9.84
1.5169	33.75		1.5169	55.93		1.5169	9.21		1.5169	9.86
1.5177	33.7		1.5177	56.05		1.5177	9.22		1.5177	9.88
1.5185	33.66		1.5185	56.17		1.5185	9.23		1.5185	9.9
1.5193	33.6		1.5193	56.31		1.5193	9.24		1.5193	9.92
1.5201	33.54		1.5201	56.48		1.5201	9.25		1.5201	9.95
1.5209	33.48		1.5209	56.68		1.5209	9.25		1.5209	9.98
1.5217	33.42		1.5217	56.9		1.5217	9.25		1.5217	10.01
1.5225	33.38		1.5225	57.13		1.5225	9.25		1.5225	10.04
1.5233	33.35		1.5233	57.38		1.5233	9.25		1.5233	10.07
1.5241	33.33		1.5241	57.63		1.5241	9.26		1.5241	10.1
1.5249	33.3		1.5249	57.89		1.5249	9.27		1.5249	10.13
1.5257	33.25		1.5257	58.16		1.5257	9.28		1.5257	10.16
1.5264	33.21		1.5264	58.45		1.5264	9.29		1.5264	10.19
1.5272	33.16		1.5272	58.75		1.5272	9.3		1.5272	10.22
1.528	33.12		1.528	59.05		1.528	9.31		1.528	10.24
1.5288	33.08		1.5288	59.35		1.5288	9.32		1.5288	10.26
1.5296	33.04		1.5296	59.65		1.5296	9.32		1.5296	10.27
1.5304	33.02		1.5304	59.94		1.5304	9.32		1.5304	10.28
1.5312	33.01		1.5312	60.21		1.5312	9.32		1.5312	10.3
1.532	33.02		1.532	60.49		1.532	9.32		1.532	10.32
1.5328	33.05		1.5328	60.76		1.5328	9.32		1.5328	10.34
1.5336	33.08		1.5336	61.02		1.5336	9.32		1.5336	10.35
1.5344	33.12		1.5344	61.26		1.5344	9.33		1.5344	10.36
1.5352	33.17		1.5352	61.47		1.5352	9.34		1.5352	10.38
1.536	33.21		1.536	61.67		1.536	9.35		1.536	10.4
1.5368	33.25		1.5368	61.85		1.5368	9.35		1.5368	10.42
1.5376	33.28		1.5376	62.03		1.5376	9.35		1.5376	10.45
1.5384	33.31		1.5384	62.2		1.5384	9.35		1.5384	10.48
1.5392	33.33		1.5392	62.37		1.5392	9.35		1.5392	10.52
1.54	33.35		1.54	62.54		1.54	9.34		1.54	10.55
1.5408	33.39		1.5408	62.72		1.5408	9.33		1.5408	10.59
1.5416	33.45		1.5416	62.92		1.5416	9.32		1.5416	10.63
1.5424	33.52		1.5424	63.15		1.5424	9.31		1.5424	10.67
1.5432	33.59		1.5432	63.41		1.5432	9.3		1.5432	10.7
1.544	33.66		1.544	63.69		1.544	9.28		1.544	10.73
1.5448	33.72		1.5448	63.99		1.5448	9.26		1.5448	10.76
1.5456	33.8		1.5456	64.29		1.5456	9.25		1.5456	10.78
1.5464	33.88		1.5464	64.59		1.5464	9.25		1.5464	10.8
1.5472	33.97		1.5472	64.9		1.5472	9.24		1.5472	10.83
1.548	34.06		1.548	65.24		1.548	9.23		1.548	10.85
1.5488	34.14		1.5488	65.6		1.5488	9.21		1.5488	10.87
1.5496	34.2		1.5496	65.97		1.5496	9.19		1.5496	10.89
1.5504	34.27		1.5504	66.36		1.5504	9.17		1.5504	10.91
1.5511	34.31		1.5511	66.75		1.5511	9.15		1.5511	10.92
1.5519	34.36		1.5519	67.15		1.5519	9.14		1.5519	10.9
1.5527	34.42		1.5527	67.54		1.5527	9.14		1.5527	10.86
1.5535	34.5		1.5535	67.92		1.5535	9.14		1.5535	10.81
1.5543	34.58		1.5543	68.28		1.5543	9.14		1.5543	10.77
1.5551	34.66		1.5551	68.63		1.5551	9.14		1.5551	10.75
1.5559	34.75		1.5559	68.96		1.5559	9.16		1.5559	10.77
1.5567	34.84		1.5567	69.26		1.5567	9.16		1.5567	10.81
1.5575	34.94		1.5575	69.51		1.5575	9.16		1.5575	10.85
1.5583	35.04		1.5583	69.73		1.5583	9.16		1.5583	10.9
1.5591	35.14		1.5591	69.89		1.5591	9.16		1.5591	10.94
1.5599	35.24		1.5599	70		1.5599	9.16		1.5599	10.99
1.5607	35.33		1.5607	70.07		1.5607	9.16		1.5607	11.03
1.5615	35.41		1.5615	70.12		1.5615	9.16		1.5615	11.06
1.5623	35.48		1.5623	70.16		1.5623	9.16		1.5623	11.09
1.5631	35.53		1.5631	70.2		1.5631	9.16		1.5631	11.11
1.5639	35.55		1.5639	70.26		1.5639	9.16		1.5639	11.12
1.5647	35.57		1.5647	70.33		1.5647	9.16		1.5647	11.11
1.5655	35.57		1.5655	70.4		1.5655	9.17		1.5655	11.08
1.5663	35.57		1.5663	70.46		1.5663	9.19		1.5663	11.05
1.5671	35.57		1.5671	70.54		1.5671	9.2		1.5671	11.04
1.5679	35.59		1.5679	70.64		1.5679	9.22		1.5679	11.05
1.5687	35.6		1.5687	70.77		1.5687	9.24		1.5687	11.08
1.5695	35.61		1.5695	70.91		1.5695	9.26		1.5695	11.12
1.5703	35.62		1.5703	71.06		1.5703	9.28		1.5703	11.16
1.5711	35.66		1.5711	71.19		1.5711	9.28		1.5711	11.19
1.5719	35.72		1.5719	71.31		1.5719	9.3		1.5719	11.22
1.5727	35.81		1.5727	71.43		1.5727	9.3		1.5727	11.25
1.5735	35.91		1.5735	71.57		1.5735	9.31		1.5735	11.28
1.5743	36.03		1.5743	71.74		1.5743	9.32		1.5743	11.32
1.575	36.14		1.575	71.93		1.575	9.32		1.575	11.36
1.5758	36.25		1.5758	72.14		1.5758	9.33		1.5758	11.41
1.5766	36.35		1.5766	72.37		1.5766	9.34		1.5766	11.46
1.5774	36.44		1.5774	72.61		1.5774	9.35		1.5774	11.51
1.5782	36.53		1.5782	72.87		1.5782	9.38		1.5782	11.55
1.579	36.63		1.579	73.18		1.579	9.4		1.579	11.59
1.5798	36.74		1.5798	73.52		1.5798	9.42		1.5798	11.63
1.5806	36.88		1.5806	73.89		1.5806	9.44		1.5806	11.67
1.5814	37.03		1.5814	74.27		1.5814	9.46		1.5814	11.71
1.5822	37.17		1.5822	74.66		1.5822	9.49		1.5822	11.75
1.583	37.31		1.583	75.03		1.583	9.52		1.583	11.79
1.5838	37.46		1.5838	75.36		1.5838	9.57		1.5838	11.82
1.5846	37.61		1.5846	75.66		1.5846	9.62		1.5846	11.85
1.5854	37.77		1.5854	75.9		1.5854	9.68		1.5854	11.88
1.5862	37.95		1.5862	76.08		1.5862	9.74		1.5862	11.91
1.587	38.14		1.587	76.2		1.587	9.81		1.587	11.92
1.5878	38.34		1.5878	76.28		1.5878	9.88		1.5878	11.93
1.5886	38.52		1.5886	76.34		1.5886	9.93		1.5886	11.94
1.5894	38.7		1.5894	76.4		1.5894	9.98		1.5894	11.93
1.5902	38.87		1.5902	76.45		1.5902	10.03		1.5902	11.92
[truncated: 27,443 more rows]

## Sheet: D
Note: Hairs were scanned from root (0 cm) to tip, but are graphed from tip (as 0 cm) to root. Therefore, all hairs are reversed when graphed.
Reverted Hairs			Distance (cm)	Intensity (A.U.)
Distance (cm)	Intensity (A.U.)		0	153.95		Distance (cm)	Intensity (A.U.)		Distance (cm)	Intensity (A.U.)
0	137.24		0.0008	153.95		0	160.39		0	139.43
0.0008	137.31		0.00159	153.95		0.0008	160.58		0.0008	139.42
0.0016	137.35		0.00239	153.96		0.00159	160.72		0.00159	139.4
0.0024	137.37		0.00319	153.94		0.00239	160.81		0.00239	139.37
0.0032	137.39		0.00398	153.92		0.00319	160.88		0.00319	139.34
0.004	137.4		0.00478	153.89		0.00398	160.91		0.00398	139.32
0.0048	137.39		0.00558	153.87		0.00478	160.93		0.00478	139.3
0.0056	137.38		0.00637	153.87		0.00558	160.94		0.00558	139.27
0.0064	137.37		0.00717	153.86		0.00637	160.95		0.00637	139.23
0.0072	137.36		0.00797	153.84		0.00717	160.96		0.00717	139.2
0.008	137.37		0.00876	153.83		0.00797	160.96		0.00797	139.16
0.0088	137.41		0.00956	153.82		0.00876	160.99		0.00876	139.14
0.0096	137.49		0.01036	153.8		0.00956	160.99		0.00956	139.14
0.0104	137.58		0.01115	153.8		0.01036	161.01		0.01036	139.13
0.0112	137.67		0.01195	153.78		0.01115	161		0.01115	139.14
0.012	137.76		0.01275	153.77		0.01195	160.99		0.01195	139.15
0.0127	137.84		0.01354	153.77		0.01275	160.97		0.01275	139.14
0.0135	137.95		0.01434	153.78		0.01354	160.96		0.01354	139.13
0.0143	138.07		0.01514	153.79		0.01434	160.95		0.01434	139.12
0.0151	138.21		0.01593	153.82		0.01514	160.94		0.01514	139.09
0.0159	138.36		0.01673	153.85		0.01593	160.92		0.01593	139.04
0.0167	138.49		0.01753	153.85		0.01673	160.91		0.01673	138.98
0.0175	138.6		0.01832	153.84		0.01753	160.9		0.01753	138.93
0.0183	138.7		0.01912	153.79		0.01832	160.9		0.01832	138.88
0.0191	138.8		0.01992	153.7		0.01912	160.91		0.01912	138.83
0.0199	138.88		0.02071	153.59		0.01992	160.91		0.01992	138.79
0.0207	138.94		0.02151	153.48		0.02071	160.92		0.02071	138.76
0.0215	138.98		0.02231	153.38		0.02151	160.92		0.02151	138.75
0.0223	139.01		0.0231	153.34		0.02231	160.92		0.02231	138.75
0.0231	139.05		0.0239	153.32		0.0231	160.92		0.0231	138.76
0.0239	139.13		0.0247	153.36		0.0239	160.93		0.0239	138.77
0.0247	139.25		0.02549	153.44		0.0247	160.94		0.0247	138.79
0.0255	139.38		0.02629	153.52		0.02549	160.96		0.02549	138.81
0.0263	139.48		0.02709	153.61		0.02629	160.97		0.02629	138.82
0.0271	139.54		0.02788	153.7		0.02709	160.96		0.02709	138.82
0.0279	139.57		0.02868	153.75		0.02788	160.94		0.02788	138.82
0.0287	139.6		0.02948	153.78		0.02868	160.9		0.02868	138.81
0.0295	139.6		0.03027	153.82		0.02948	160.84		0.02948	138.82
0.0303	139.58		0.03107	153.84		0.03027	160.78		0.03027	138.87
0.0311	139.54		0.03187	153.86		0.03107	160.73		0.03107	138.93
0.0319	139.49		0.03266	153.85		0.03187	160.67		0.03187	139.01
0.0327	139.46		0.03346	153.84		0.03266	160.62		0.03266	139.09
0.0335	139.44		0.03426	153.84		0.03346	160.54		0.03346	139.16
0.0343	139.43		0.03505	153.84		0.03426	160.49		0.03426	139.22
0.0351	139.43		0.03585	153.83		0.03505	160.42		0.03505	139.26
0.0359	139.43		0.03665	153.81		0.03585	160.38		0.03585	139.3
0.0366	139.42		0.03744	153.78		0.03665	160.32		0.03665	139.34
0.0374	139.39		0.03824	153.8		0.03744	160.28		0.03744	139.37
0.0382	139.39		0.03904	153.83		0.03824	160.27		0.03824	139.37
0.039	139.4		0.03983	153.85		0.03904	160.25		0.03904	139.36
0.0398	139.4		0.04063	153.87		0.03983	160.22		0.03983	139.33
0.0406	139.4		0.04143	153.89		0.04063	160.18		0.04063	139.29
0.0414	139.4		0.04222	153.94		0.04143	160.14		0.04143	139.23
0.0422	139.43		0.04302	154.01		0.04222	160.09		0.04222	139.19
0.043	139.47		0.04382	154.08		0.04302	160.03		0.04302	139.17
0.0438	139.51		0.04461	154.14		0.04382	159.96		0.04382	139.18
0.0446	139.52		0.04541	154.19		0.04461	159.88		0.04461	139.19
0.0454	139.5		0.04621	154.25		0.04541	159.83		0.04541	139.22
0.0462	139.45		0.047	154.31		0.04621	159.76		0.04621	139.25
0.047	139.38		0.0478	154.37		0.047	159.67		0.047	139.27
0.0478	139.29		0.0486	154.43		0.0478	159.61		0.0478	139.3
0.0486	139.21		0.04939	154.49		0.0486	159.56		0.0486	139.33
0.0494	139.14		0.05019	154.55		0.04939	159.5		0.04939	139.36
0.0502	139.09		0.05099	154.6		0.05019	159.45		0.05019	139.35
0.051	139.07		0.05178	154.61		0.05099	159.42		0.05099	139.33
0.0518	139.07		0.05258	154.62		0.05178	159.38		0.05178	139.3
0.0526	139.07		0.05338	154.64		0.05258	159.31		0.05258	139.26
0.0534	139.08		0.05417	154.68		0.05338	159.23		0.05338	139.22
0.0542	139.11		0.05497	154.75		0.05417	159.15		0.05417	139.18
0.055	139.14		0.05577	154.83		0.05497	159.08		0.05497	139.14
0.0558	139.14		0.05656	154.95		0.05577	159		0.05577	139.12
0.0566	139.11		0.05736	155.07		0.05656	158.91		0.05656	139.12
0.0574	139.04		0.05816	155.16		0.05736	158.84		0.05736	139.14
0.0582	138.96		0.05895	155.23		0.05816	158.78		0.05816	139.17
0.059	138.89		0.05975	155.28		0.05895	158.73		0.05895	139.2
0.0598	138.82		0.06055	155.33		0.05975	158.67		0.05975	139.23
0.0605	138.74		0.06134	155.35		0.06055	158.6		0.06055	139.27
0.0613	138.67		0.06214	155.4		0.06134	158.52		0.06134	139.31
0.0621	138.61		0.06294	155.44		0.06214	158.41		0.06214	139.35
0.0629	138.55		0.06373	155.46		0.06294	158.3		0.06294	139.38
0.0637	138.5		0.06453	155.47		0.06373	158.17		0.06373	139.41
0.0645	138.45		0.06533	155.48		0.06453	158.05		0.06453	139.44
0.0653	138.4		0.06612	155.46		0.06533	157.94		0.06533	139.47
0.0661	138.35		0.06692	155.43		0.06612	157.83		0.06612	139.51
0.0669	138.31		0.06772	155.4		0.06692	157.74		0.06692	139.54
0.0677	138.27		0.06851	155.39		0.06772	157.66		0.06772	139.55
0.0685	138.21		0.06931	155.4		0.06851	157.58		0.06851	139.55
0.0693	138.13		0.07011	155.4		0.06931	157.51		0.06931	139.56
0.0701	138.03		0.07091	155.38		0.07011	157.45		0.07011	139.57
0.0709	137.91		0.0717	155.35		0.07091	157.38		0.07091	139.57
0.0717	137.78		0.0725	155.33		0.0717	157.31		0.0717	139.56
0.0725	137.64		0.0733	155.33		0.0725	157.24		0.0725	139.54
0.0733	137.49		0.07409	155.34		0.0733	157.16		0.0733	139.5
0.0741	137.36		0.07489	155.34		0.07409	157.06		0.07409	139.47
0.0749	137.25		0.07569	155.36		0.07489	156.98		0.07489	139.43
0.0757	137.17		0.07648	155.36		0.07569	156.93		0.07569	139.38
0.0765	137.11		0.07728	155.36		0.07648	156.88		0.07648	139.33
0.0773	137.06		0.07808	155.35		0.07728	156.85		0.07728	139.27
0.0781	137.03		0.07887	155.35		0.07808	156.8		0.07808	139.25
0.0789	137.02		0.07967	155.33		0.07887	156.74		0.07887	139.23
0.0797	137.01		0.08047	155.31		0.07967	156.66		0.07967	139.21
0.0805	136.98		0.08126	155.29		0.08047	156.58		0.08047	139.19
0.0813	136.92		0.08206	155.3		0.08126	156.55		0.08126	139.17
0.0821	136.84		0.08286	155.32		0.08206	156.54		0.08206	139.15
0.0829	136.76		0.08365	155.35		0.08286	156.54		0.08286	139.13
0.0837	136.7		0.08445	155.4		0.08365	156.55		0.08365	139.11
0.0844	136.65		0.08525	155.44		0.08445	156.54		0.08445	139.09
0.0852	136.62		0.08604	155.47		0.08525	156.51		0.08525	139.06
0.086	136.6		0.08684	155.51		0.08604	156.47		0.08604	139.03
0.0868	136.6		0.08764	155.56		0.08684	156.42		0.08684	139
0.0876	136.61		0.08843	155.59		0.08764	156.36		0.08764	138.98
0.0884	136.62		0.08923	155.62		0.08843	156.3		0.08843	138.95
0.0892	136.64		0.09003	155.65		0.08923	156.26		0.08923	138.91
0.09	136.67		0.09082	155.67		0.09003	156.22		0.09003	138.9
0.0908	136.7		0.09162	155.71		0.09082	156.2		0.09082	138.88
0.0916	136.73		0.09242	155.75		0.09162	156.18		0.09162	138.87
0.0924	136.77		0.09321	155.79		0.09242	156.16		0.09242	138.87
0.0932	136.8		0.09401	155.82		0.09321	156.15		0.09321	138.87
0.094	136.81		0.09481	155.85		0.09401	156.13		0.09401	138.85
0.0948	136.84		0.0956	155.9		0.09481	156.12		0.09481	138.83
0.0956	136.87		0.0964	155.95		0.0956	156.14		0.0956	138.8
0.0964	136.95		0.0972	156.02		0.0964	156.16		0.0964	138.76
0.0972	137.06		0.09799	156.08		0.0972	156.21		0.0972	138.73
0.098	137.16		0.09879	156.17		0.09799	156.24		0.09799	138.71
0.0988	137.24		0.09959	156.29		0.09879	156.26		0.09879	138.7
0.0996	137.32		0.10038	156.42		0.09959	156.3		0.09959	138.69
0.1004	137.39		0.10118	156.55		0.10038	156.34		0.10038	138.68
0.1012	137.45		0.10198	156.66		0.10118	156.39		0.10118	138.67
0.102	137.51		0.10277	156.7		0.10198	156.43		0.10198	138.66
0.1028	137.56		0.10357	156.71		0.10277	156.5		0.10277	138.65
0.1036	137.58		0.10437	156.66		0.10357	156.56		0.10357	138.64
0.1044	137.57		0.10516	156.59		0.10437	156.64		0.10437	138.64
0.1052	137.55		0.10596	156.54		0.10516	156.75		0.10516	138.65
0.106	137.56		0.10676	156.48		0.10596	156.85		0.10596	138.67
0.1068	137.6		0.10755	156.45		0.10676	156.98		0.10676	138.68
0.1076	137.66		0.10835	156.41		0.10755	157.12		0.10755	138.66
0.1083	137.74		0.10915	156.38		0.10835	157.26		0.10835	138.65
0.1091	137.86		0.10994	156.36		0.10915	157.4		0.10915	138.65
0.1099	137.99		0.11074	156.34		0.10994	157.52		0.10994	138.64
0.1107	138.11		0.11154	156.3		0.11074	157.6		0.11074	138.63
0.1115	138.23		0.11233	156.26		0.11154	157.67		0.11154	138.61
0.1123	138.33		0.11313	156.19		0.11233	157.73		0.11233	138.6
0.1131	138.42		0.11393	156.11		0.11313	157.79		0.11313	138.59
0.1139	138.52		0.11472	156.03		0.11393	157.82		0.11393	138.58
0.1147	138.62		0.11552	155.96		0.11472	157.86		0.11472	138.57
0.1155	138.73		0.11632	155.89		0.11552	157.88		0.11552	138.55
0.1163	138.85		0.11711	155.82		0.11632	157.91		0.11632	138.52
0.1171	138.98		0.11791	155.72		0.11711	157.94		0.11711	138.49
0.1179	139.1		0.11871	155.62		0.11791	157.97		0.11791	138.47
0.1187	139.2		0.1195	155.55		0.11871	158.02		0.11871	138.44
0.1195	139.28		0.1203	155.51		0.1195	158.04		0.1195	138.43
0.1203	139.35		0.1211	155.47		0.1203	158.05		0.1203	138.42
0.1211	139.4		0.12189	155.43		0.1211	158.06		0.1211	138.42
0.1219	139.42		0.12269	155.4		0.12189	158.06		0.12189	138.42
0.1227	139.43		0.12349	155.35		0.12269	158.07		0.12269	138.41
0.1235	139.46		0.12428	155.28		0.12349	158.09		0.12349	138.39
0.1243	139.5		0.12508	155.2		0.12428	158.11		0.12428	138.39
0.1251	139.56		0.12588	155.09		0.12508	158.12		0.12508	138.39
0.1259	139.63		0.12667	154.96		0.12588	158.12		0.12588	138.39
0.1267	139.73		0.12747	154.84		0.12667	158.13		0.12667	138.4
0.1275	139.84		0.12827	154.71		0.12747	158.12		0.12747	138.43
0.1283	139.92		0.12906	154.59		0.12827	158.14		0.12827	138.45
0.1291	139.99		0.12986	154.47		0.12906	158.18		0.12906	138.48
0.1299	140.03		0.13066	154.36		0.12986	158.23		0.12986	138.53
0.1307	140.03		0.13145	154.26		0.13066	158.28		0.13066	138.59
0.1315	140.01		0.13225	154.2		0.13145	158.35		0.13145	138.64
0.1322	140		0.13305	154.14		0.13225	158.45		0.13225	138.7
0.133	139.98		0.13384	154.07		0.13305	158.59		0.13305	138.76
0.1338	139.96		0.13464	153.98		0.13384	158.71		0.13384	138.82
0.1346	139.93		0.13544	153.87		0.13464	158.8		0.13464	138.86
0.1354	139.9		0.13623	153.73		0.13544	158.88		0.13544	138.9
0.1362	139.89		0.13703	153.57		0.13623	158.92		0.13623	138.96
0.137	139.91		0.13783	153.41		0.13703	158.94		0.13703	139.01
0.1378	139.94		0.13862	153.27		0.13783	158.94		0.13783	139.06
0.1386	139.97		0.13942	153.14		0.13862	158.93		0.13862	139.11
0.1394	139.99		0.14022	152.99		0.13942	158.94		0.13942	139.16
0.1402	140		0.14101	152.87		0.14022	158.97		0.14022	139.22
0.141	140.02		0.14181	152.76		0.14101	159		0.14101	139.28
0.1418	140.05		0.14261	152.66		0.14181	159.04		0.14181	139.32
0.1426	140.1		0.1434	152.58		0.14261	159.1		0.14261	139.35
0.1434	140.14		0.1442	152.53		0.1434	159.19		0.1434	139.36
0.1442	140.18		0.145	152.5		0.1442	159.28		0.1442	139.36
0.145	140.23		0.14579	152.49		0.145	159.37		0.145	139.36
0.1458	140.29		0.14659	152.49		0.14579	159.47		0.14579	139.36
0.1466	140.36		0.14739	152.49		0.14659	159.53		0.14659	139.37
0.1474	140.45		0.14818	152.48		0.14739	159.58		0.14739	139.39
0.1482	140.57		0.14898	152.47		0.14818	159.62		0.14818	139.42
0.149	140.69		0.14978	152.48		0.14898	159.66		0.14898	139.45
0.1498	140.8		0.15057	152.5		0.14978	159.7		0.14978	139.49
0.1506	140.87		0.15137	152.54		0.15057	159.75		0.15057	139.53
0.1514	140.92		0.15217	152.58		0.15137	159.81		0.15137	139.58
0.1522	140.98		0.15296	152.61		0.15217	159.86		0.15217	139.65
0.153	141.05		0.15376	152.63		0.15296	159.91		0.15296	139.74
0.1538	141.12		0.15456	152.64		0.15376	159.96		0.15376	139.82
0.1546	141.19		0.15535	152.64		0.15456	160.01		0.15456	139.9
0.1554	141.22		0.15615	152.66		0.15535	160.01		0.15535	139.99
0.1562	141.22		0.15695	152.67		0.15615	159.99		0.15615	140.08
0.1569	141.2		0.15774	152.67		0.15695	159.96		0.15695	140.18
0.1577	141.14		0.15854	152.65		0.15774	159.95		0.15774	140.25
0.1585	141.05		0.15934	152.64		0.15854	159.94		0.15854	140.3
0.1593	140.94		0.16013	152.6		0.15934	159.95		0.15934	140.36
0.1601	140.87		0.16093	152.54		0.16013	159.98		0.16013	140.42
0.1609	140.84		0.16173	152.46		0.16093	160.02		0.16093	140.48
0.1617	140.81		0.16252	152.38		0.16173	160.05		0.16173	140.57
0.1625	140.8		0.16332	152.29		0.16252	160.04		0.16252	140.66
0.1633	140.79		0.16412	152.19		0.16332	160.03		0.16332	140.75
0.1641	140.81		0.16491	152.08		0.16412	160.03		0.16412	140.83
0.1649	140.84		0.16571	151.97		0.16491	160.03		0.16491	140.91
0.1657	140.9		0.16651	151.87		0.16571	160.02		0.16571	140.97
0.1665	140.97		0.1673	151.77		0.16651	160.01		0.16651	141.03
0.1673	141.03		0.1681	151.67		0.1673	159.99		0.1673	141.1
0.1681	141.09		0.1689	151.56		0.1681	159.94		0.1681	141.18
0.1689	141.12		0.16969	151.45		0.1689	159.87		0.1689	141.25
0.1697	141.13		0.17049	151.36		0.16969	159.77		0.16969	141.3
0.1705	141.14		0.17129	151.27		0.17049	159.64		0.17049	141.34
0.1713	141.15		0.17208	151.19		0.17129	159.5		0.17129	141.36
0.1721	141.15		0.17288	151.12		0.17208	159.35		0.17208	141.39
0.1729	141.15		0.17368	151.04		0.17288	159.2		0.17288	141.42
0.1737	141.15		0.17447	150.95		0.17368	159.06		0.17368	141.47
0.1745	141.12		0.17527	150.86		0.17447	158.91		0.17447	141.54
0.1753	141.08		0.17607	150.78		0.17527	158.73		0.17527	141.63
0.1761	141.01		0.17686	150.72		0.17607	158.56		0.17607	141.73
0.1769	140.93		0.17766	150.66		0.17686	158.37		0.17686	141.81
0.1777	140.87		0.17846	150.63		0.17766	158.19		0.17766	141.87
0.1785	140.84		0.17925	150.6		0.17846	158.01		0.17846	141.93
0.1793	140.82		0.18005	150.57		0.17925	157.84		0.17925	141.99
0.1801	140.82		0.18085	150.54		0.18005	157.67		0.18005	142.05
0.1808	140.84		0.18164	150.52		0.18085	157.5		0.18085	142.11
0.1816	140.84		0.18244	150.51		0.18164	157.33		0.18164	142.19
0.1824	140.83		0.18324	150.49		0.18244	157.12		0.18244	142.28
0.1832	140.82		0.18403	150.45		0.18324	156.91		0.18324	142.38
0.184	140.79		0.18483	150.38		0.18403	156.69		0.18403	142.47
0.1848	140.75		0.18563	150.29		0.18483	156.44		0.18483	142.55
0.1856	140.71		0.18642	150.19		0.18563	156.19		0.18563	142.61
0.1864	140.68		0.18722	150.06		0.18642	155.96		0.18642	142.66
0.1872	140.68		0.18802	149.93		0.18722	155.74		0.18722	142.72
0.188	140.69		0.18881	149.81		0.18802	155.55		0.18802	142.76
0.1888	140.7		0.18961	149.69		0.18881	155.38		0.18881	142.78
0.1896	140.72		0.19041	149.56		0.18961	155.22		0.18961	142.8
0.1904	140.75		0.1912	149.42		0.19041	155.1		0.19041	142.83
0.1912	140.79		0.192	149.29		0.1912	155		0.1912	142.86
0.192	140.82		0.1928	149.18		0.192	154.9		0.192	142.89
0.1928	140.85		0.19359	149.08		0.1928	154.85		0.1928	142.9
0.1936	140.88		0.19439	148.99		0.19359	154.82		0.19359	142.89
0.1944	140.92		0.19519	148.92		0.19439	154.79		0.19439	142.86
0.1952	140.97		0.19598	148.84		0.19519	154.79		0.19519	142.82
0.196	141.02		0.19678	148.78		0.19598	154.8		0.19598	142.78
0.1968	141.07		0.19758	148.71		0.19678	154.82		0.19678	142.74
0.1976	141.11		0.19837	148.64		0.19758	154.83		0.19758	142.7
0.1984	141.14		0.19917	148.56		0.19837	154.82		0.19837	142.67
0.1992	141.17		0.19997	148.45		0.19917	154.82		0.19917	142.65
0.2	141.2		0.20076	148.36		0.19997	154.81		0.19997	142.63
0.2008	141.23		0.20156	148.26		0.20076	154.81		0.20076	142.6
0.2016	141.28		0.20236	148.15		0.20156	154.79		0.20156	142.57
0.2024	141.33		0.20315	148.07		0.20236	154.77		0.20236	142.55
0.2032	141.39		0.20395	148.01		0.20315	154.74		0.20315	142.53
0.204	141.46		0.20475	147.98		0.20395	154.7		0.20395	142.51
0.2047	141.54		0.20554	147.97		0.20475	154.65		0.20475	142.49
0.2055	141.64		0.20634	147.98		0.20554	154.62		0.20554	142.47
0.2063	141.74		0.20714	147.98		0.20634	154.58		0.20634	142.43
0.2071	141.84		0.20793	147.99		0.20714	154.58		0.20714	142.37
0.2079	141.94		0.20873	148.01		0.20793	154.54		0.20793	142.33
0.2087	142.02		0.20953	148.05		0.20873	154.48		0.20873	142.3
0.2095	142.09		0.21033	148.09		0.20953	154.41		0.20953	142.27
0.2103	142.18		0.21112	148.16		0.21033	154.32		0.21033	142.23
0.2111	142.29		0.21192	148.19		0.21112	154.23		0.21112	142.2
0.2119	142.41		0.21272	148.22		0.21192	154.11		0.21192	142.16
0.2127	142.55		0.21351	148.24		0.21272	153.96		0.21272	142.11
0.2135	142.69		0.21431	148.29		0.21351	153.85		0.21351	142.06
0.2143	142.85		0.21511	148.36		0.21431	153.75		0.21431	142.01
0.2151	143.04		0.2159	148.44		0.21511	153.66		0.21511	141.95
0.2159	143.24		0.2167	148.55		0.2159	153.61		0.2159	141.88
0.2167	143.44		0.2175	148.67		0.2167	153.6		0.2167	141.84
0.2175	143.65		0.21829	148.77		0.2175	153.57		0.2175	141.81
0.2183	143.83		0.21909	148.86		0.21829	153.56		0.21829	141.79
0.2191	144.02		0.21989	148.97		0.21909	153.52		0.21909	141.78
0.2199	144.21		0.22068	149.06		0.21989	153.47		0.21989	141.75
0.2207	144.39		0.22148	149.11		0.22068	153.43		0.22068	141.72
0.2215	144.56		0.22228	149.16		0.22148	153.38		0.22148	141.7
0.2223	144.74		0.22307	149.22		0.22228	153.32		0.22228	141.69
0.2231	144.92		0.22387	149.26		0.22307	153.24		0.22307	141.69
0.2239	145.1		0.22467	149.29		0.22387	153.15		0.22387	141.71
0.2247	145.27		0.22546	149.32		0.22467	153.06		0.22467	141.74
0.2255	145.43		0.22626	149.35		0.22546	152.95		0.22546	141.77
0.2263	145.58		0.22706	149.37		0.22626	152.86		0.22626	141.78
0.2271	145.71		0.22785	149.38		0.22706	152.77		0.22706	141.78
0.2279	145.83		0.22865	149.36		0.22785	152.68		0.22785	141.78
0.2286	145.98		0.22945	149.32		0.22865	152.59		0.22865	141.78
0.2294	146.15		0.23024	149.27		0.22945	152.5		0.22945	141.78
0.2302	146.34		0.23104	149.22		0.23024	152.4		0.23024	141.79
0.231	146.53		0.23184	149.14		0.23104	152.3		0.23104	141.81
0.2318	146.69		0.23263	149.07		0.23184	152.22		0.23184	141.81
0.2326	146.83		0.23343	149		0.23263	152.14		0.23263	141.78
0.2334	146.95		0.23423	148.93		0.23343	152.08		0.23343	141.73
0.2342	147.05		0.23502	148.88		0.23423	152.02		0.23423	141.65
0.235	147.17		0.23582	148.87		0.23502	151.97		0.23502	141.55
0.2358	147.28		0.23662	148.88		0.23582	151.94		0.23582	141.45
0.2366	147.4		0.23741	148.91		0.23662	151.91		0.23662	141.36
0.2374	147.52		0.23821	148.95		0.23741	151.88		0.23741	141.29
0.2382	147.65		0.23901	148.98		0.23821	151.87		0.23821	141.24
0.239	147.8		0.2398	149		0.23901	151.84		0.23901	141.19
0.2398	147.94		0.2406	149.02		0.2398	151.77		0.2398	141.15
0.2406	148.08		0.2414	149.04		0.2406	151.65		0.2406	141.12
0.2414	148.23		0.24219	149.07		0.2414	151.52		0.2414	141.08
0.2422	148.35		0.24299	149.11		0.24219	151.4		0.24219	141.03
0.243	148.45		0.24379	149.18		0.24299	151.26		0.24299	140.98
0.2438	148.52		0.24458	149.26		0.24379	151.12		0.24379	140.94
0.2446	148.57		0.24538	149.36		0.24458	151		0.24458	140.92
0.2454	148.61		0.24618	149.46		0.24538	150.9		0.24538	140.93
0.2462	148.64		0.24697	149.56		0.24618	150.81		0.24618	140.94
0.247	148.66		0.24777	149.69		0.24697	150.73		0.24697	140.94
0.2478	148.66		0.24857	149.84		0.24777	150.65		0.24777	140.93
0.2486	148.66		0.24936	149.99		0.24857	150.58		0.24857	140.92
0.2494	148.68		0.25016	150.12		0.24936	150.53		0.24936	140.91
0.2502	148.7		0.25096	150.25		0.25016	150.5		0.25016	140.9
0.251	148.71		0.25175	150.36		0.25096	150.49		0.25096	140.91
0.2518	148.72		0.25255	150.45		0.25175	150.5		0.25175	140.91
0.2525	148.71		0.25335	150.52		0.25255	150.51		0.25255	140.91
0.2533	148.68		0.25414	150.58		0.25335	150.51		0.25335	140.91
0.2541	148.64		0.25494	150.64		0.25414	150.51		0.25414	140.91
0.2549	148.56		0.25574	150.7		0.25494	150.51		0.25494	140.91
0.2557	148.48		0.25653	150.75		0.25574	150.49		0.25574	140.91
0.2565	148.4		0.25733	150.81		0.25653	150.46		0.25653	140.91
0.2573	148.33		0.25813	150.84		0.25733	150.46		0.25733	140.91
0.2581	148.27		0.25892	150.87		0.25813	150.46		0.25813	140.9
0.2589	148.23		0.25972	150.91		0.25892	150.47		0.25892	140.89
0.2597	148.18		0.26052	150.94		0.25972	150.48		0.25972	140.89
0.2605	148.12		0.26131	150.98		0.26052	150.48		0.26052	140.88
0.2613	148.04		0.26211	151		0.26131	150.48		0.26131	140.85
0.2621	147.94		0.26291	151.02		0.26211	150.49		0.26211	140.81
0.2629	147.81		0.2637	151.05		0.26291	150.48		0.26291	140.76
0.2637	147.69		0.2645	151.1		0.2637	150.47		0.2637	140.72
0.2645	147.56		0.2653	151.14		0.2645	150.49		0.2645	140.67
0.2653	147.43		0.26609	151.2		0.2653	150.5		0.2653	140.63
0.2661	147.28		0.26689	151.27		0.26609	150.48		0.26609	140.59
0.2669	147.11		0.26769	151.37		0.26689	150.43		0.26689	140.56
0.2677	146.95		0.26848	151.48		0.26769	150.34		0.26769	140.52
0.2685	146.79		0.26928	151.6		0.26848	150.24		0.26848	140.49
0.2693	146.63		0.27008	151.74		0.26928	150.12		0.26928	140.46
0.2701	146.47		0.27087	151.91		0.27008	150.01		0.27008	140.44
0.2709	146.28		0.27167	152.07		0.27087	149.91		0.27087	140.43
0.2717	146.09		0.27247	152.24		0.27167	149.82		0.27167	140.42
0.2725	145.91		0.27326	152.43		0.27247	149.71		0.27247	140.44
0.2733	145.74		0.27406	152.61		0.27326	149.6		0.27326	140.48
0.2741	145.59		0.27486	152.78		0.27406	149.47		0.27406	140.54
0.2749	145.44		0.27565	152.95		0.27486	149.35		0.27486	140.62
0.2757	145.31		0.27645	153.09		0.27565	149.23		0.27565	140.71
0.2764	145.2		0.27725	153.22		0.27645	149.11		0.27645	140.79
0.2772	145.09		0.27804	153.33		0.27725	149		0.27725	140.86
0.278	144.99		0.27884	153.42		0.27804	148.88		0.27804	140.92
0.2788	144.9		0.27964	153.5		0.27884	148.78		0.27884	140.96
0.2796	144.8		0.28043	153.58		0.27964	148.7		0.27964	141.01
0.2804	144.68		0.28123	153.65		0.28043	148.62		0.28043	141.06
0.2812	144.55		0.28203	153.72		0.28123	148.55		0.28123	141.11
0.282	144.42		0.28282	153.77		0.28203	148.49		0.28203	141.15
0.2828	144.29		0.28362	153.82		0.28282	148.4		0.28282	141.16
0.2836	144.16		0.28442	153.83		0.28362	148.33		0.28362	141.15
0.2844	144.03		0.28521	153.84		0.28442	148.27		0.28442	141.13
0.2852	143.91		0.28601	153.84		0.28521	148.22		0.28521	141.11
0.286	143.78		0.28681	153.84		0.28601	148.21		0.28601	141.12
0.2868	143.65		0.2876	153.82		0.28681	148.19		0.28681	141.14
0.2876	143.53		0.2884	153.8		0.2876	148.17		0.2876	141.14
0.2884	143.42		0.2892	153.76		0.2884	148.17		0.2884	141.14
0.2892	143.3		0.28999	153.72		0.2892	148.15		0.2892	141.14
0.29	143.15		0.29079	153.66		0.28999	148.13		0.28999	141.15
0.2908	142.97		0.29159	153.61		0.29079	148.1		0.29079	141.15
0.2916	142.77		0.29238	153.56		0.29159	148.09		0.29159	141.15
0.2924	142.57		0.29318	153.5		0.29238	148.07		0.29238	141.17
0.2932	142.39		0.29398	153.44		0.29318	148.02		0.29318	141.19
0.294	142.22		0.29477	153.38		0.29398	147.98		0.29398	141.22
0.2948	142.04		0.29557	153.32		0.29477	147.95		0.29477	141.27
0.2956	141.85		0.29637	153.24		0.29557	147.9		0.29557	141.31
0.2964	141.66		0.29716	153.15		0.29637	147.86		0.29637	141.33
0.2972	141.45		0.29796	153.08		0.29716	147.85		0.29716	141.34
0.298	141.27		0.29876	153		0.29796	147.82		0.29796	141.34
0.2988	141.09		0.29955	152.93		0.29876	147.8		0.29876	141.33
0.2996	140.93		0.30035	152.89		0.29955	147.79		0.29955	141.33
0.3004	140.77		0.30115	152.88		0.30035	147.76		0.30035	141.34
0.3011	140.61		0.30194	152.9		0.30115	147.75		0.30115	141.36
0.3019	140.44		0.30274	152.92		0.30194	147.74		0.30194	141.37
0.3027	140.27		0.30354	152.96		0.30274	147.71		0.30274	141.38
0.3035	140.08		0.30433	152.98		0.30354	147.66		0.30354	141.37
0.3043	139.87		0.30513	153		0.30433	147.61		0.30433	141.35
0.3051	139.64		0.30593	153.04		0.30513	147.59		0.30513	141.34
0.3059	139.4		0.30672	153.09		0.30593	147.56		0.30593	141.33
0.3067	139.16		0.30752	153.16		0.30672	147.56		0.30672	141.33
0.3075	138.91		0.30832	153.23		0.30752	147.59		0.30752	141.32
0.3083	138.65		0.30911	153.3		0.30832	147.63		0.30832	141.32
0.3091	138.4		0.30991	153.37		0.30911	147.68		0.30911	141.32
0.3099	138.18		0.31071	153.42		0.30991	147.72		0.30991	141.3
0.3107	137.99		0.3115	153.48		0.31071	147.73		0.31071	141.27
0.3115	137.85		0.3123	153.53		0.3115	147.73		0.3115	141.25
0.3123	137.75		0.3131	153.59		0.3123	147.74		0.3123	141.24
0.3131	137.66		0.31389	153.66		0.3131	147.74		0.3131	141.26
0.3139	137.58		0.31469	153.73		0.31389	147.73		0.31389	141.31
0.3147	137.48		0.31549	153.77		0.31469	147.75		0.31469	141.37
0.3155	137.4		0.31628	153.8		0.31549	147.76		0.31549	141.42
0.3163	137.32		0.31708	153.82		0.31628	147.77		0.31628	141.47
0.3171	137.24		0.31788	153.83		0.31708	147.78		0.31708	141.51
0.3179	137.16		0.31867	153.83		0.31788	147.76		0.31788	141.54
0.3187	137.06		0.31947	153.84		0.31867	147.73		0.31867	141.56
0.3195	136.97		0.32027	153.82		0.31947	147.71		0.31947	141.58
0.3203	136.89		0.32106	153.78		0.32027	147.7		0.32027	141.6
0.3211	136.83		0.32186	153.72		0.32106	147.69		0.32106	141.63
0.3219	136.8		0.32266	153.66		0.32186	147.71		0.32186	141.67
0.3227	136.78		0.32345	153.59		0.32266	147.74		0.32266	141.72
0.3235	136.77		0.32425	153.52		0.32345	147.78		0.32345	141.78
0.3243	136.76		0.32505	153.44		0.32425	147.84		0.32425	141.83
0.325	136.75		0.32584	153.38		0.32505	147.89		0.32505	141.87
0.3258	136.75		0.32664	153.33		0.32584	147.93		0.32584	141.9
0.3266	136.77		0.32744	153.28		0.32664	147.95		0.32664	141.91
0.3274	136.8		0.32823	153.22		0.32744	147.98		0.32744	141.9
0.3282	136.83		0.32903	153.18		0.32823	148		0.32823	141.88
0.329	136.84		0.32983	153.16		0.32903	148.02		0.32903	141.86
0.3298	136.84		0.33062	153.15		0.32983	148.03		0.32983	141.85
0.3306	136.83		0.33142	153.14		0.33062	148.03		0.33062	141.84
0.3314	136.83		0.33222	153.13		0.33142	148.01		0.33142	141.83
0.3322	136.84		0.33301	153.14		0.33222	147.98		0.33222	141.83
0.333	136.9		0.33381	153.14		0.33301	147.96		0.33301	141.84
0.3338	136.99		0.33461	153.09		0.33381	147.94		0.33381	141.85
0.3346	137.13		0.3354	153.02		0.33461	147.94		0.33461	141.86
0.3354	137.27		0.3362	152.94		0.3354	147.96		0.3354	141.85
0.3362	137.4		0.337	152.86		0.3362	147.98		0.3362	141.82
0.337	137.49		0.33779	152.8		0.337	147.98		0.337	141.8
0.3378	137.55		0.33859	152.78		0.33779	147.97		0.33779	141.78
0.3386	137.58		0.33939	152.77		0.33859	147.94		0.33859	141.76
0.3394	137.61		0.34018	152.76		0.33939	147.91		0.33939	141.75
0.3402	137.66		0.34098	152.74		0.34018	147.88		0.34018	141.75
0.341	137.75		0.34178	152.74		0.34098	147.86		0.34098	141.74
0.3418	137.88		0.34257	152.76		0.34178	147.86		0.34178	141.73
0.3426	138.05		0.34337	152.8		0.34257	147.88		0.34257	141.71
0.3434	138.23		0.34417	152.85		0.34337	147.91		0.34337	141.67
0.3442	138.44		0.34496	152.93		0.34417	147.92		0.34417	141.65
0.345	138.64		0.34576	153.02		0.34496	147.95		0.34496	141.63
0.3458	138.82		0.34656	153.1		0.34576	147.99		0.34576	141.61
0.3466	138.99		0.34736	153.16		0.34656	148.03		0.34656	141.58
0.3474	139.11		0.34815	153.21		0.34736	148.08		0.34736	141.56
0.3482	139.19		0.34895	153.24		0.34815	148.11		0.34815	141.52
0.3489	139.24		0.34975	153.26		0.34895	148.16		0.34895	141.47
0.3497	139.28		0.35054	153.25		0.34975	148.18		0.34975	141.41
0.3505	139.36		0.35134	153.26		0.35054	148.18		0.35054	141.34
0.3513	139.48		0.35214	153.26		0.35134	148.15		0.35134	141.28
0.3521	139.61		0.35293	153.26		0.35214	148.11		0.35214	141.2
0.3529	139.74		0.35373	153.26		0.35293	148.06		0.35293	141.11
0.3537	139.85		0.35453	153.25		0.35373	148.02		0.35373	141.03
0.3545	139.96		0.35532	153.24		0.35453	147.97		0.35453	140.94
0.3553	140.05		0.35612	153.26		0.35532	147.91		0.35532	140.86
0.3561	140.1		0.35692	153.28		0.35612	147.85		0.35612	140.81
0.3569	140.13		0.35771	153.3		0.35692	147.78		0.35692	140.79
0.3577	140.15		0.35851	153.32		0.35771	147.72		0.35771	140.79
0.3585	140.17		0.35931	153.35		0.35851	147.66		0.35851	140.79
0.3593	140.22		0.3601	153.33		0.35931	147.59		0.35931	140.79
0.3601	140.31		0.3609	153.32		0.3601	147.53		0.3601	140.77
0.3609	140.42		0.3617	153.3		0.3609	147.48		0.3609	140.75
0.3617	140.55		0.36249	153.28		0.3617	147.41		0.3617	140.74
0.3625	140.68		0.36329	153.26		0.36249	147.36		0.36249	140.78
0.3633	140.83		0.36409	153.27		0.36329	147.29		0.36329	140.84
0.3641	140.98		0.36488	153.28		0.36409	147.22		0.36409	140.92
0.3649	141.12		0.36568	153.31		0.36488	147.15		0.36488	141
0.3657	141.26		0.36648	153.35		0.36568	147.08		0.36568	141.05
0.3665	141.4		0.36727	153.41		0.36648	147.03		0.36648	141.08
0.3673	141.54		0.36807	153.46		0.36727	147		0.36727	141.11
0.3681	141.69		0.36887	153.52		0.36807	146.97		0.36807	141.14
0.3689	141.87		0.36966	153.57		0.36887	146.94		0.36887	141.18
0.3697	142.09		0.37046	153.62		0.36966	146.93		0.36966	141.22
0.3705	142.34		0.37126	153.68		0.37046	146.93		0.37046	141.27
0.3713	142.61		0.37205	153.75		0.37126	146.94		0.37126	141.31
0.3721	142.87		0.37285	153.84		0.37205	146.97		0.37205	141.33
0.3728	143.1		0.37365	153.92		0.37285	147		0.37285	141.35
0.3736	143.3		0.37444	154		0.37365	147.01		0.37365	141.35
0.3744	143.5		0.37524	154.07		0.37444	147.01		0.37444	141.33
0.3752	143.71		0.37604	154.13		0.37524	147.01		0.37524	141.29
0.376	143.92		0.37683	154.19		0.37604	147.01		0.37604	141.26
0.3768	144.13		0.37763	154.22		0.37683	147		0.37683	141.23
0.3776	144.32		0.37843	154.24		0.37763	147		0.37763	141.2
0.3784	144.48		0.37922	154.25		0.37843	146.98		0.37843	141.18
0.3792	144.58		0.38002	154.24		0.37922	146.94		0.37922	141.16
0.38	144.64		0.38082	154.24		0.38002	146.87		0.38002	141.14
0.3808	144.68		0.38161	154.22		0.38082	146.76		0.38082	141.13
0.3816	144.7		0.38241	154.18		0.38161	146.65		0.38161	141.13
0.3824	144.72		0.38321	154.13		0.38241	146.55		0.38241	141.14
0.3832	144.76		0.384	154.08		0.38321	146.48		0.38321	141.18
0.384	144.82		0.3848	154.05		0.384	146.4		0.384	141.24
0.3848	144.9		0.3856	154.01		0.3848	146.33		0.3848	141.28
0.3856	144.98		0.38639	153.98		0.3856	146.26		0.3856	141.33
0.3864	145.06		0.38719	153.95		0.38639	146.18		0.38639	141.38
0.3872	145.15		0.38799	153.95		0.38719	146.1		0.38719	141.41
0.388	145.24		0.38878	153.97		0.38799	146.03		0.38799	141.43
0.3888	145.31		0.38958	153.98		0.38878	145.94		0.38878	141.43
0.3896	145.35		0.39038	154.02		0.38958	145.88		0.38958	141.45
0.3904	145.38		0.39117	154.08		0.39038	145.84		0.39038	141.46
0.3912	145.4		0.39197	154.16		0.39117	145.8		0.39117	141.47
0.392	145.4		0.39277	154.24		0.39197	145.75		0.39197	141.48
0.3928	145.4		0.39356	154.31		0.39277	145.68		0.39277	141.46
0.3936	145.39		0.39436	154.36		0.39356	145.61		0.39356	141.44
0.3944	145.39		0.39516	154.38		0.39436	145.51		0.39436	141.42
0.3952	145.37		0.39595	154.4		0.39516	145.42		0.39516	141.42
0.396	145.33		0.39675	154.41		0.39595	145.34		0.39595	141.42
0.3967	145.32		0.39755	154.44		0.39675	145.27		0.39675	141.43
0.3975	145.34		0.39834	154.48		0.39755	145.23		0.39755	141.45
0.3983	145.39		0.39914	154.53		0.39834	145.2		0.39834	141.46
0.3991	145.45		0.39994	154.6		0.39914	145.17		0.39914	141.46
0.3999	145.5		0.40073	154.7		0.39994	145.17		0.39994	141.46
0.4007	145.55		0.40153	154.79		0.40073	145.18		0.40073	141.44
0.4015	145.59		0.40233	154.88		0.40153	145.17		0.40153	141.42
0.4023	145.63		0.40312	154.95		0.40233	145.18		0.40233	141.38
0.4031	145.67		0.40392	155.03		0.40312	145.16		0.40312	141.35
0.4039	145.72		0.40472	155.11		0.40392	145.1		0.40392	141.31
0.4047	145.78		0.40551	155.16		0.40472	145.05		0.40472	141.26
0.4055	145.84		0.40631	155.21		0.40551	145.02		0.40551	141.22
0.4063	145.87		0.40711	155.25		0.40631	145.02		0.40631	141.2
0.4071	145.88		0.4079	155.28		0.40711	145.02		0.40711	141.18
0.4079	145.88		0.4087	155.3		0.4079	145.04		0.4079	141.17
0.4087	145.88		0.4095	155.28		0.4087	145.06		0.4087	141.17
0.4095	145.9		0.41029	155.25		0.4095	145.09		0.4095	141.16
0.4103	145.95		0.41109	155.21		0.41029	145.12		0.41029	141.14
0.4111	146.02		0.41189	155.16		0.41109	145.17		0.41109	141.13
0.4119	146.11		0.41268	155.1		0.41189	145.21		0.41189	141.12
0.4127	146.17		0.41348	155.06		0.41268	145.26		0.41268	141.12
0.4135	146.19		0.41428	155.05		0.41348	145.33		0.41348	141.11
0.4143	146.16		0.41507	155.06		0.41428	145.41		0.41428	141.07
0.4151	146.09		0.41587	155.07		0.41507	145.48		0.41507	141.05
0.4159	146		0.41667	155.09		0.41587	145.56		0.41587	141.05
0.4167	145.91		0.41746	155.1		0.41667	145.63		0.41667	141.05
0.4175	145.84		0.41826	155.08		0.41746	145.7		0.41746	141.06
0.4183	145.81		0.41906	155.06		0.41826	145.77		0.41826	141.06
0.4191	145.8		0.41985	155.08		0.41906	145.83		0.41906	141.04
0.4199	145.79		0.42065	155.1		0.41985	145.89		0.41985	141
0.4207	145.76		0.42145	155.12		0.42065	145.97		0.42065	140.96
0.4214	145.71		0.42224	155.13		0.42145	146.05		0.42145	140.91
0.4222	145.66		0.42304	155.11		0.42224	146.13		0.42224	140.88
0.423	145.61		0.42384	155.09		0.42304	146.2		0.42304	140.86
0.4238	145.55		0.42463	155.04		0.42384	146.26		0.42384	140.84
0.4246	145.48		0.42543	154.98		0.42463	146.28		0.42463	140.83
0.4254	145.43		0.42623	154.91		0.42543	146.28		0.42543	140.83
0.4262	145.37		0.42702	154.85		0.42623	146.28		0.42623	140.84
0.427	145.34		0.42782	154.77		0.42702	146.32		0.42702	140.85
0.4278	145.35		0.42862	154.71		0.42782	146.39		0.42782	140.88
0.4286	145.38		0.42941	154.66		0.42862	146.47		0.42862	140.93
0.4294	145.42		0.43021	154.63		0.42941	146.56		0.42941	140.99
0.4302	145.43		0.43101	154.59		0.43021	146.63		0.43021	141.04
0.431	145.41		0.4318	154.55		0.43101	146.7		0.43101	141.09
0.4318	145.37		0.4326	154.5		0.4318	146.76		0.4318	141.14
0.4326	145.32		0.4334	154.43		0.4326	146.8		0.4326	141.15
0.4334	145.27		0.43419	154.35		0.4334	146.84		0.4334	141.11
0.4342	145.23		0.43499	154.27		0.43419	146.87		0.43419	141
0.435	145.21		0.43579	154.16		0.43499	146.89		0.43499	140.86
0.4358	145.24		0.43658	154.09		0.43579	146.91		0.43579	140.7
0.4366	145.3		0.43738	154.04		0.43658	146.92		0.43658	140.53
0.4374	145.38		0.43818	154.01		0.43738	146.92		0.43738	140.39
0.4382	145.47		0.43897	154		0.43818	146.91		0.43818	140.33
0.439	145.55		0.43977	154		0.43897	146.91		0.43897	140.32
0.4398	145.61		0.44057	153.99		0.43977	146.89		0.43977	140.34
0.4406	145.67		0.44136	153.97		0.44057	146.88		0.44057	140.36
0.4414	145.72		0.44216	153.95		0.44136	146.88		0.44136	140.37
0.4422	145.78		0.44296	153.92		0.44216	146.9		0.44216	140.36
0.443	145.82		0.44375	153.9		0.44296	146.94		0.44296	140.33
0.4438	145.87		0.44455	153.9		0.44375	147		0.44375	140.28
0.4446	145.93		0.44535	153.89		0.44455	147.05		0.44455	140.25
0.4453	145.99		0.44614	153.86		0.44535	147.08		0.44535	140.23
0.4461	146.04		0.44694	153.82		0.44614	147.09		0.44614	140.23
0.4469	146.08		0.44774	153.77		0.44694	147.09		0.44694	140.24
0.4477	146.11		0.44853	153.72		0.44774	147.09		0.44774	140.24
0.4485	146.12		0.44933	153.7		0.44853	147.1		0.44853	140.21
0.4493	146.1		0.45013	153.68		0.44933	147.1		0.44933	140.15
0.4501	146.06		0.45092	153.66		0.45013	147.11		0.45013	140.07
0.4509	146		0.45172	153.63		0.45092	147.11		0.45092	139.97
0.4517	145.93		0.45252	153.59		0.45172	147.12		0.45172	139.88
0.4525	145.88		0.45331	153.54		0.45252	147.14		0.45252	139.8
0.4533	145.85		0.45411	153.49		0.45331	147.18		0.45331	139.76
0.4541	145.84		0.45491	153.45		0.45411	147.2		0.45411	139.72
0.4549	145.82		0.4557	153.44		0.45491	147.22		0.45491	139.73
0.4557	145.79		0.4565	153.43		0.4557	147.22		0.4557	139.74
0.4565	145.77		0.4573	153.44		0.4565	147.21		0.4565	139.74
0.4573	145.74		0.45809	153.48		0.4573	147.22		0.4573	139.73
0.4581	145.74		0.45889	153.51		0.45809	147.25		0.45809	139.71
0.4589	145.78		0.45969	153.55		0.45889	147.29		0.45889	139.71
0.4597	145.84		0.46048	153.56		0.45969	147.37		0.45969	139.71
0.4605	145.88		0.46128	153.57		0.46048	147.47		0.46048	139.72
0.4613	145.9		0.46208	153.59		0.46128	147.57		0.46128	139.72
0.4621	145.91		0.46287	153.6		0.46208	147.66		0.46208	139.71
0.4629	145.9		0.46367	153.6		0.46287	147.74		0.46287	139.66
0.4637	145.89		0.46447	153.56		0.46367	147.81		0.46367	139.59
0.4645	145.89		0.46526	153.51		0.46447	147.86		0.46447	139.53
0.4653	145.91		0.46606	153.45		0.46526	147.93		0.46526	139.46
0.4661	145.94		0.46686	153.38		0.46606	148		0.46606	139.37
0.4669	145.97		0.46765	153.29		0.46686	148.04		0.46686	139.31
0.4677	146.01		0.46845	153.19		0.46765	148.06		0.46765	139.25
0.4685	146.07		0.46925	153.1		0.46845	148.1		0.46845	139.19
0.4692	146.14		0.47004	152.98		0.46925	148.14		0.46925	139.13
0.47	146.18		0.47084	152.85		0.47004	148.17		0.47004	139.08
0.4708	146.2		0.47164	152.72		0.47084	148.19		0.47084	139.04
0.4716	146.19		0.47243	152.57		0.47164	148.22		0.47164	139.02
0.4724	146.15		0.47323	152.42		0.47243	148.27		0.47243	139.04
0.4732	146.11		0.47403	152.27		0.47323	148.32		0.47323	139.06
0.474	146.06		0.47482	152.15		0.47403	148.37		0.47403	139.06
0.4748	146.03		0.47562	152.02		0.47482	148.41		0.47482	139.05
0.4756	146.03		0.47642	151.9		0.47562	148.45		0.47562	139.04
0.4764	146.02		0.47721	151.78		0.47642	148.5		0.47642	139.02
0.4772	145.99		0.47801	151.67		0.47721	148.54		0.47721	138.98
0.478	145.94		0.47881	151.57		0.47801	148.57		0.47801	138.96
0.4788	145.88		0.4796	151.49		0.47881	148.6		0.47881	138.95
0.4796	145.84		0.4804	151.42		0.4796	148.6		0.4796	138.94
0.4804	145.81		0.4812	151.36		0.4804	148.59		0.4804	138.95
0.4812	145.79		0.48199	151.3		0.4812	148.6		0.4812	138.98
0.482	145.79		0.48279	151.23		0.48199	148.59		0.48199	139.03
0.4828	145.8		0.48359	151.15		0.48279	148.59		0.48279	139.05
0.4836	145.81		0.48438	151.07		0.48359	148.59		0.48359	139.09
0.4844	145.81		0.48518	151		0.48438	148.57		0.48438	139.14
0.4852	145.79		0.48598	150.93		0.48518	148.55		0.48518	139.2
0.486	145.77		0.48678	150.87		0.48598	148.52		0.48598	139.23
0.4868	145.75		0.48757	150.84		0.48678	148.5		0.48678	139.27
0.4876	145.73		0.48837	150.81		0.48757	148.48		0.48757	139.3
0.4884	145.71		0.48917	150.79		0.48837	148.46		0.48837	139.33
0.4892	145.67		0.48996	150.77		0.48917	148.41		0.48917	139.36
0.49	145.61		0.49076	150.75		0.48996	148.36		0.48996	139.4
0.4908	145.54		0.49156	150.72		0.49076	148.31		0.49076	139.45
0.4916	145.46		0.49235	150.71		0.49156	148.29		0.49156	139.51
0.4924	145.4		0.49315	150.71		0.49235	148.27		0.49235	139.56
0.4931	145.38		0.49395	150.72		0.49315	148.22		0.49315	139.62
0.4939	145.4		0.49474	150.73		0.49395	148.17		0.49395	139.7
0.4947	145.47		0.49554	150.75		0.49474	148.12		0.49474	139.77
0.4955	145.58		0.49634	150.77		0.49554	148.07		0.49554	139.83
0.4963	145.72		0.49713	150.78		0.49634	148.01		0.49634	139.9
0.4971	145.84		0.49793	150.79		0.49713	147.95		0.49713	139.97
0.4979	145.94		0.49873	150.79		0.49793	147.89		0.49793	140.06
0.4987	146.02		0.49952	150.76		0.49873	147.85		0.49873	140.15
0.4995	146.09		0.50032	150.74		0.49952	147.82		0.49952	140.24
0.5003	146.16		0.50112	150.72		0.50032	147.77		0.50032	140.33
0.5011	146.24		0.50191	150.68		0.50112	147.71		0.50112	140.43
0.5019	146.31		0.50271	150.67		0.50191	147.65		0.50191	140.51
0.5027	146.37		0.50351	150.66		0.50271	147.6		0.50271	140.59
0.5035	146.4		0.5043	150.67		0.50351	147.54		0.50351	140.65
0.5043	146.43		0.5051	150.68		0.5043	147.5		0.5043	140.7
0.5051	146.47		0.5059	150.7		0.5051	147.45		0.5051	140.76
0.5059	146.53		0.50669	150.71		0.5059	147.43		0.5059	140.81
0.5067	146.6		0.50749	150.73		0.50669	147.4		0.50669	140.87
0.5075	146.66		0.50829	150.73		0.50749	147.37		0.50749	140.93
0.5083	146.72		0.50908	150.73		0.50829	147.34		0.50829	140.97
0.5091	146.77		0.50988	150.71		0.50908	147.3		0.50908	140.99
0.5099	146.83		0.51068	150.69		0.50988	147.26		0.50988	141.01
0.5107	146.91		0.51147	150.68		0.51068	147.21		0.51068	141.01
0.5115	147		0.51227	150.67		0.51147	147.15		0.51147	141.01
0.5123	147.1		0.51307	150.69		0.51227	147.1		0.51227	141.04
0.5131	147.2		0.51386	150.73		0.51307	147.06		0.51307	141.1
0.5139	147.29		0.51466	150.79		0.51386	147.04		0.51386	141.22
0.5147	147.38		0.51546	150.84		0.51466	147.04		0.51466	141.36
0.5155	147.45		0.51625	150.85		0.51546	147.03		0.51546	141.5
0.5163	147.51		0.51705	150.86		0.51625	147.04		0.51625	141.63
0.517	147.55		0.51785	150.84		0.51705	147.07		0.51705	141.73
0.5178	147.57		0.51864	150.79		0.51785	147.1		0.51785	141.75
0.5186	147.55		0.51944	150.76		0.51864	147.13		0.51864	141.72
0.5194	147.51		0.52024	150.74		0.51944	147.16		0.51944	141.69
0.5202	147.45		0.52103	150.73		0.52024	147.17		0.52024	141.67
0.521	147.39		0.52183	150.72		0.52103	147.17		0.52103	141.66
0.5218	147.32		0.52263	150.71		0.52183	147.16		0.52183	141.66
0.5226	147.26		0.52342	150.67		0.52263	147.15		0.52263	141.7
0.5234	147.2		0.52422	150.63		0.52342	147.13		0.52342	141.77
0.5242	147.13		0.52502	150.59		0.52422	147.11		0.52422	141.81
0.525	147.05		0.52581	150.57		0.52502	147.1		0.52502	141.83
0.5258	146.97		0.52661	150.56		0.52581	147.07		0.52581	141.85
0.5266	146.9		0.52741	150.57		0.52661	147.05		0.52661	141.86
0.5274	146.83		0.5282	150.58		0.52741	147.02		0.52741	141.87
0.5282	146.77		0.529	150.62		0.5282	147.01		0.5282	141.91
0.529	146.72		0.5298	150.65		0.529	147		0.529	141.95
0.5298	146.69		0.53059	150.66		0.5298	146.98		0.5298	141.99
0.5306	146.66		0.53139	150.66		0.53059	146.96		0.53059	142.05
0.5314	146.65		0.53219	150.66		0.53139	146.94		0.53139	142.11
0.5322	146.64		0.53298	150.65		0.53219	146.9		0.53219	142.16
0.533	146.63		0.53378	150.63		0.53298	146.86		0.53298	142.19
0.5338	146.58		0.53458	150.6		0.53378	146.85		0.53378	142.21
0.5346	146.52		0.53537	150.55		0.53458	146.84		0.53458	142.2
0.5354	146.46		0.53617	150.51		0.53537	146.84		0.53537	142.17
0.5362	146.39		0.53697	150.47		0.53617	146.85		0.53617	142.15
0.537	146.34		0.53776	150.39		0.53697	146.82		0.53697	142.12
0.5378	146.3		0.53856	150.34		0.53776	146.8		0.53776	142.09
0.5386	146.27		0.53936	150.3		0.53856	146.8		0.53856	142.04
0.5394	146.27		0.54015	150.26		0.53936	146.8		0.53936	141.99
0.5402	146.31		0.54095	150.21		0.54015	146.81		0.54015	141.92
0.5409	146.38		0.54175	150.15		0.54095	146.83		0.54095	141.86
0.5417	146.46		0.54254	150.1		0.54175	146.87		0.54175	141.81
0.5425	146.55		0.54334	150.07		0.54254	146.9		0.54254	141.79
0.5433	146.63		0.54414	150.06		0.54334	146.94		0.54334	141.81
0.5441	146.71		0.54493	150.05		0.54414	146.98		0.54414	141.83
0.5449	146.79		0.54573	150.05		0.54493	147.02		0.54493	141.85
0.5457	146.86		0.54653	150.06		0.54573	147.05		0.54573	141.85
0.5465	146.92		0.54732	150.09		0.54653	147.09		0.54653	141.79
0.5473	146.98		0.54812	150.13		0.54732	147.14		0.54732	141.69
0.5481	147.03		0.54892	150.16		0.54812	147.17		0.54812	141.55
0.5489	147.08		0.54971	150.18		0.54892	147.18		0.54892	141.4
0.5497	147.16		0.55051	150.19		0.54971	147.22		0.54971	141.31
0.5505	147.25		0.55131	150.19		0.55051	147.25		0.55051	141.28
0.5513	147.36		0.5521	150.19		0.55131	147.26		0.55131	141.3
0.5521	147.48		0.5529	150.19		0.5521	147.28		0.5521	141.31
0.5529	147.57		0.5537	150.2		0.5529	147.28		0.5529	141.33
0.5537	147.64		0.55449	150.2		0.5537	147.29		0.5537	141.37
0.5545	147.68		0.55529	150.22		0.55449	147.31		0.55449	141.39
0.5553	147.7		0.55609	150.23		0.55529	147.32		0.55529	141.4
0.5561	147.72		0.55688	150.23		0.55609	147.32		0.55609	141.42
0.5569	147.74		0.55768	150.22		0.55688	147.31		0.55688	141.44
0.5577	147.79		0.55848	150.21		0.55768	147.31		0.55768	141.45
0.5585	147.85		0.55927	150.21		0.55848	147.34		0.55848	141.44
0.5593	147.9		0.56007	150.2		0.55927	147.39		0.55927	141.43
0.5601	147.93		0.56087	150.2		0.56007	147.47		0.56007	141.4
0.5609	147.94		0.56166	150.2		0.56087	147.53		0.56087	141.35
0.5617	147.94		0.56246	150.2		0.56166	147.57		0.56166	141.29
0.5625	147.94		0.56326	150.21		0.56246	147.59		0.56246	141.23
0.5633	147.96		0.56405	150.19		0.56326	147.62		0.56326	141.17
0.5641	147.98		0.56485	150.16		0.56405	147.64		0.56405	141.11
0.5649	148.02		0.56565	150.14		0.56485	147.64		0.56485	141.04
0.5656	148.07		0.56644	150.11		0.56565	147.66		0.56565	141.01
0.5664	148.11		0.56724	150.07		0.56644	147.68		0.56644	140.99
0.5672	148.15		0.56804	150.04		0.56724	147.71		0.56724	140.99
0.568	148.18		0.56883	150.02		0.56804	147.74		0.56804	140.98
0.5688	148.21		0.56963	150.01		0.56883	147.8		0.56883	140.98
0.5696	148.23		0.57043	149.99		0.56963	147.85		0.56963	140.97
0.5704	148.24		0.57122	149.99		0.57043	147.9		0.57043	140.97
0.5712	148.26		0.57202	149.99		0.57122	147.91		0.57122	140.97
0.572	148.28		0.57282	149.99		0.57202	147.9		0.57202	140.95
0.5728	148.3		0.57361	149.97		0.57282	147.89		0.57282	140.92
0.5736	148.33		0.57441	149.95		0.57361	147.86		0.57361	140.88
0.5744	148.36		0.57521	149.92		0.57441	147.83		0.57441	140.83
0.5752	148.37		0.576	149.88		0.57521	147.82		0.57521	140.8
0.576	148.37		0.5768	149.85		0.576	147.83		0.576	140.76
0.5768	148.37		0.5776	149.84		0.5768	147.86		0.5768	140.73
0.5776	148.35		0.57839	149.85		0.5776	147.91		0.5776	140.69
0.5784	148.32		0.57919	149.89		0.57839	147.95		0.57839	140.64
0.5792	148.27		0.57999	149.91		0.57919	148		0.57919	140.61
0.58	148.21		0.58078	149.92		0.57999	148.06		0.57999	140.61
0.5808	148.13		0.58158	149.95		0.58078	148.12		0.58078	140.64
0.5816	148.06		0.58238	149.96		0.58158	148.17		0.58158	140.7
0.5824	148		0.58317	149.97		0.58238	148.2		0.58238	140.79
0.5832	147.98		0.58397	149.99		0.58317	148.26		0.58317	140.9
0.584	147.97		0.58477	150.01		0.58397	148.33		0.58397	141.02
0.5848	147.95		0.58556	150.05		0.58477	148.43		0.58477	141.13
0.5856	147.93		0.58636	150.09		0.58556	148.51		0.58556	141.25
0.5864	147.91		0.58716	150.13		0.58636	148.56		0.58636	141.35
0.5872	147.88		0.58795	150.17		0.58716	148.61		0.58716	141.44
0.588	147.85		0.58875	150.18		0.58795	148.65		0.58795	141.54
0.5888	147.82		0.58955	150.2		0.58875	148.69		0.58875	141.65
0.5895	147.78		0.59034	150.22		0.58955	148.73		0.58955	141.77
0.5903	147.74		0.59114	150.22		0.59034	148.79		0.59034	141.89
0.5911	147.71		0.59194	150.2		0.59114	148.89		0.59114	142.02
0.5919	147.68		0.59273	150.16		0.59194	149.01		0.59194	142.16
0.5927	147.65		0.59353	150.12		0.59273	149.14		0.59273	142.31
0.5935	147.61		0.59433	150.06		0.59353	149.25		0.59353	142.49
0.5943	147.55		0.59512	150.02		0.59433	149.34		0.59433	142.67
0.5951	147.47		0.59592	149.99		0.59512	149.43		0.59512	142.85
0.5959	147.38		0.59672	149.95		0.59592	149.49		0.59592	143.02
0.5967	147.32		0.59751	149.92		0.59672	149.52		0.59672	143.16
0.5975	147.29		0.59831	149.91		0.59751	149.58		0.59751	143.29
0.5983	147.29		0.59911	149.89		0.59831	149.65		0.59831	143.4
0.5991	147.31		0.5999	149.88		0.59911	149.72		0.59911	143.5
0.5999	147.35		0.6007	149.86		0.5999	149.79		0.5999	143.58
0.6007	147.39		0.6015	149.84		0.6007	149.85		0.6007	143.63
0.6015	147.43		0.60229	149.81		0.6015	149.89		0.6015	143.65
0.6023	147.46		0.60309	149.79		0.60229	149.92		0.60229	143.64
0.6031	147.47		0.60389	149.75		0.60309	149.96		0.60309	143.59
0.6039	147.47		0.60468	149.73		0.60389	150.01		0.60389	143.54
0.6047	147.47		0.60548	149.68		0.60468	150.06		0.60468	143.51
0.6055	147.47		0.60628	149.64		0.60548	150.13		0.60548	143.49
0.6063	147.45		0.60707	149.6		0.60628	150.18		0.60628	143.49
0.6071	147.44		0.60787	149.56		0.60707	150.22		0.60707	143.48
0.6079	147.43		0.60867	149.49		0.60787	150.22		0.60787	143.46
0.6087	147.43		0.60946	149.42		0.60867	150.22		0.60867	143.42
0.6095	147.43		0.61026	149.37		0.60946	150.23		0.60946	143.32
0.6103	147.45		0.61106	149.31		0.61026	150.25		0.61026	143.2
0.6111	147.45		0.61185	149.27		0.61106	150.27		0.61106	143.07
0.6119	147.43		0.61265	149.25		0.61185	150.32		0.61185	142.96
0.6127	147.4		0.61345	149.24		0.61265	150.36		0.61265	142.89
0.6134	147.4		0.61424	149.24		0.61345	150.4		0.61345	142.89
0.6142	147.42		0.61504	149.25		0.61424	150.43		0.61424	142.92
0.615	147.44		0.61584	149.25		0.61504	150.44		0.61504	142.97
0.6158	147.47		0.61663	149.24		0.61584	150.45		0.61584	143.03
0.6166	147.49		0.61743	149.24		0.61663	150.48		0.61663	143.11
0.6174	147.48		0.61823	149.2		0.61743	150.49		0.61743	143.2
0.6182	147.44		0.61902	149.15		0.61823	150.48		0.61823	143.28
0.619	147.38		0.61982	149.1		0.61902	150.47		0.61902	143.37
0.6198	147.31		0.62062	149.06		0.61982	150.46		0.61982	143.45
0.6206	147.23		0.62141	149.03		0.62062	150.45		0.62062	143.52
0.6214	147.14		0.62221	149.01		0.62141	150.44		0.62141	143.57
0.6222	147.05		0.62301	148.98		0.62221	150.45		0.62221	143.61
0.623	146.99		0.6238	148.95		0.62301	150.46		0.62301	143.63
0.6238	146.93		0.6246	148.93		0.6238	150.46		0.6238	143.66
0.6246	146.87		0.6254	148.91		0.6246	150.46		0.6246	143.7
0.6254	146.83		0.6262	148.87		0.6254	150.46		0.6254	143.78
0.6262	146.82		0.62699	148.81		0.6262	150.45		0.6262	143.9
0.627	146.81		0.62779	148.74		0.62699	150.42		0.62699	144.04
0.6278	146.82		0.62859	148.67		0.62779	150.41		0.62779	144.22
0.6286	146.83		0.62938	148.6		0.62859	150.4		0.62859	144.41
0.6294	146.84		0.63018	148.54		0.62938	150.38		0.62938	144.54
0.6302	146.84		0.63098	148.47		0.63018	150.38		0.63018	144.6
0.631	146.84		0.63177	148.41		0.63098	150.4		0.63098	144.6
0.6318	146.85		0.63257	148.38		0.63177	150.41		0.63177	144.59
0.6326	146.88		0.63337	148.35		0.63257	150.46		0.63257	144.56
0.6334	146.93		0.63416	148.34		0.63337	150.49		0.63337	144.52
0.6342	147.01		0.63496	148.3		0.63416	150.5		0.63416	144.5
0.635	147.09		0.63576	148.26		0.63496	150.51		0.63496	144.47
0.6358	147.14		0.63655	148.22		0.63576	150.52		0.63576	144.43
0.6366	147.17		0.63735	148.18		0.63655	150.53		0.63655	144.41
0.6373	147.15		0.63815	148.12		0.63735	150.55		0.63735	144.38
0.6381	147.1		0.63894	148.04		0.63815	150.55		0.63815	144.35
0.6389	147.04		0.63974	147.95		0.63894	150.55		0.63894	144.31
0.6397	146.98		0.64054	147.87		0.63974	150.52		0.63974	144.27
0.6405	146.95		0.64133	147.79		0.64054	150.49		0.64054	144.22
0.6413	146.95		0.64213	147.69		0.64133	150.49		0.64133	144.17
0.6421	146.97		0.64293	147.6		0.64213	150.53		0.64213	144.13
0.6429	146.99		0.64372	147.53		0.64293	150.57		0.64293	144.07
0.6437	147.02		0.64452	147.46		0.64372	150.61		0.64372	144.02
0.6445	147.04		0.64532	147.37		0.64452	150.65		0.64452	143.97
0.6453	147.06		0.64611	147.29		0.64532	150.68		0.64532	143.9
0.6461	147.11		0.64691	147.22		0.64611	150.69		0.64611	143.82
0.6469	147.18		0.64771	147.16		0.64691	150.68		0.64691	143.74
0.6477	147.26		0.6485	147.12		0.64771	150.67		0.64771	143.67
0.6485	147.35		0.6493	147.09		0.6485	150.69		0.6485	143.62
0.6493	147.46		0.6501	147.07		0.6493	150.74		0.6493	143.58
0.6501	147.56		0.65089	147.07		0.6501	150.79		0.6501	143.53
0.6509	147.64		0.65169	147.06		0.65089	150.86		0.65089	143.47
0.6517	147.7		0.65249	147.03		0.65169	150.94		0.65169	143.42
0.6525	147.75		0.65328	146.99		0.65249	151.02		0.65249	143.37
0.6533	147.8		0.65408	146.94		0.65328	151.11		0.65328	143.34
0.6541	147.85		0.65488	146.88		0.65408	151.19		0.65408	143.32
0.6549	147.9		0.65567	146.81		0.65488	151.23		0.65488	143.31
0.6557	147.92		0.65647	146.74		0.65567	151.27		0.65567	143.3
0.6565	147.93		0.65727	146.64		0.65647	151.32		0.65647	143.29
0.6573	147.94		0.65806	146.53		0.65727	151.34		0.65727	143.28
0.6581	147.95		0.65886	146.41		0.65806	151.37		0.65806	143.28
0.6589	147.98		0.65966	146.3		0.65886	151.39		0.65886	143.28
0.6597	148.04		0.66045	146.19		0.65966	151.39		0.65966	143.27
0.6605	148.12		0.66125	146.07		0.66045	151.38		0.66045	143.24
0.6612	148.21		0.66205	145.95		0.66125	151.39		0.66125	143.18
0.662	148.3		0.66284	145.82		0.66205	151.42		0.66205	143.07
0.6628	148.39		0.66364	145.67		0.66284	151.43		0.66284	142.92
0.6636	148.49		0.66444	145.51		0.66364	151.43		0.66364	142.74
0.6644	148.59		0.66523	145.33		0.66444	151.43		0.66444	142.57
0.6652	148.69		0.66603	145.16		0.66523	151.44		0.66523	142.42
0.666	148.78		0.66683	144.98		0.66603	151.46		0.66603	142.3
0.6668	148.89		0.66762	144.81		0.66683	151.48		0.66683	142.2
0.6676	149		0.66842	144.65		0.66762	151.51		0.66762	142.11
0.6684	149.12		0.66922	144.49		0.66842	151.51		0.66842	142.02
0.6692	149.25		0.67001	144.34		0.66922	151.5		0.66922	141.93
0.67	149.36		0.67081	144.2		0.67001	151.47		0.67001	141.84
0.6708	149.46		0.67161	144.07		0.67081	151.4		0.67081	141.75
0.6716	149.55		0.6724	143.95		0.67161	151.32		0.67161	141.65
0.6724	149.62		0.6732	143.81		0.6724	151.22		0.6724	141.55
0.6732	149.68		0.674	143.68		0.6732	151.13		0.6732	141.44
0.674	149.73		0.67479	143.54		0.674	151.04		0.674	141.35
0.6748	149.79		0.67559	143.4		0.67479	150.96		0.67479	141.29
0.6756	149.85		0.67639	143.26		0.67559	150.94		0.67559	141.24
0.6764	149.89		0.67718	143.11		0.67639	150.95		0.67639	141.22
0.6772	149.91		0.67798	142.95		0.67718	150.95		0.67718	141.19
0.678	149.94		0.67878	142.8		0.67798	150.94		0.67798	141.17
0.6788	149.98		0.67957	142.64		0.67878	150.94		0.67878	141.13
0.6796	150.01		0.68037	142.5		0.67957	150.95		0.67957	141.09
0.6804	150.05		0.68117	142.36		0.68037	150.99		0.68037	141.08
0.6812	150.09		0.68196	142.23		0.68117	151.06		0.68117	141.09
0.682	150.11		0.68276	142.11		0.68196	151.13		0.68196	141.11
0.6828	150.13		0.68356	141.99		0.68276	151.18		0.68276	141.16
0.6836	150.16		0.68435	141.84		0.68356	151.2		0.68356	141.22
0.6844	150.19		0.68515	141.72		0.68435	151.2		0.68435	141.27
0.6851	150.23		0.68595	141.58		0.68515	151.18		0.68515	141.29
0.6859	150.3		0.68674	141.44		0.68595	151.2		0.68595	141.29
0.6867	150.37		0.68754	141.28		0.68674	151.23		0.68674	141.3
0.6875	150.45		0.68834	141.11		0.68754	151.28		0.68754	141.32
0.6883	150.53		0.68913	140.93		0.68834	151.34		0.68834	141.39
0.6891	150.6		0.68993	140.73		0.68913	151.4		0.68913	141.52
0.6899	150.66		0.69073	140.54		0.68993	151.45		0.68993	141.68
0.6907	150.73		0.69152	140.35		0.69073	151.5		0.69073	141.84
0.6915	150.82		0.69232	140.15		0.69152	151.51		0.69152	141.97
0.6923	150.92		0.69312	139.96		0.69232	151.53		0.69232	142.06
0.6931	151		0.69391	139.79		0.69312	151.52		0.69312	142.09
0.6939	151.06		0.69471	139.6		0.69391	151.53		0.69391	142.08
0.6947	151.11		0.69551	139.43		0.69471	151.55		0.69471	142.05
0.6955	151.15		0.6963	139.25		0.69551	151.57		0.69551	142
0.6963	151.19		0.6971	139.08		0.6963	151.6		0.6963	141.97
0.6971	151.25		0.6979	138.92		0.6971	151.64		0.6971	141.93
0.6979	151.35		0.69869	138.74		0.6979	151.68		0.6979	141.9
0.6987	151.45		0.69949	138.57		0.69869	151.72		0.69869	141.86
0.6995	151.55		0.70029	138.4		0.69949	151.74		0.69949	141.83
0.7003	151.65		0.70108	138.25		0.70029	151.76		0.70029	141.81
0.7011	151.75		0.70188	138.08		0.70108	151.8		0.70108	141.81
0.7019	151.85		0.70268	137.92		0.70188	151.84		0.70188	141.81
0.7027	151.93		0.70347	137.77		0.70268	151.89		0.70268	141.82
0.7035	152.01		0.70427	137.62		0.70347	151.95		0.70347	141.83
0.7043	152.09		0.70507	137.47		0.70427	152.01		0.70427	141.85
0.7051	152.16		0.70586	137.33		0.70507	152.07		0.70507	141.88
0.7059	152.21		0.70666	137.21		0.70586	152.14		0.70586	141.93
0.7067	152.25		0.70746	137.09		0.70666	152.2		0.70666	141.99
0.7075	152.27		0.70825	136.96		0.70746	152.23		0.70746	142.05
0.7083	152.3		0.70905	136.86		0.70825	152.27		0.70825	142.1
0.7091	152.33		0.70985	136.76		0.70905	152.3		0.70905	142.15
0.7098	152.36		0.71064	136.68		0.70985	152.33		0.70985	142.2
0.7106	152.39		0.71144	136.6		0.71064	152.37		0.71064	142.25
0.7114	152.41		0.71224	136.49		0.71144	152.4		0.71144	142.29
0.7122	152.42		0.71303	136.39		0.71224	152.43		0.71224	142.35
0.713	152.42		0.71383	136.28		0.71303	152.47		0.71303	142.42
0.7138	152.39		0.71463	136.19		0.71383	152.52		0.71383	142.48
0.7146	152.37		0.71542	136.11		0.71463	152.56		0.71463	142.54
0.7154	152.38		0.71622	136.03		0.71542	152.62		0.71542	142.6
0.7162	152.43		0.71702	135.95		0.71622	152.68		0.71622	142.66
0.717	152.52		0.71781	135.88		0.71702	152.72		0.71702	142.74
0.7178	152.64		0.71861	135.8		0.71781	152.74		0.71781	142.83
0.7186	152.78		0.71941	135.7		0.71861	152.74		0.71861	142.95
0.7194	152.93		0.7202	135.61		0.71941	152.74		0.71941	143.09
0.7202	153.05		0.721	135.5		0.7202	152.72		0.7202	143.26
0.721	153.15		0.7218	135.42		0.721	152.68		0.721	143.44
0.7218	153.23		0.72259	135.33		0.7218	152.62		0.7218	143.61
0.7226	153.29		0.72339	135.24		0.72259	152.55		0.72259	143.77
0.7234	153.32		0.72419	135.17		0.72339	152.51		0.72339	143.9
0.7242	153.33		0.72498	135.12		0.72419	152.5		0.72419	143.99
0.725	153.33		0.72578	135.06		0.72498	152.49		0.72498	144.08
0.7258	153.3		0.72658	135		0.72578	152.5		0.72578	144.19
0.7266	153.26		0.72737	134.93		0.72658	152.54		0.72658	144.29
0.7274	153.21		0.72817	134.85		0.72737	152.58		0.72737	144.38
0.7282	153.15		0.72897	134.76		0.72817	152.61		0.72817	144.45
0.729	153.07		0.72976	134.67		0.72897	152.61		0.72897	144.5
0.7298	152.99		0.73056	134.56		0.72976	152.61		0.72976	144.54
0.7306	152.91		0.73136	134.43		0.73056	152.6		0.73056	144.58
0.7314	152.83		0.73215	134.33		0.73136	152.58		0.73136	144.62
0.7322	152.74		0.73295	134.22		0.73215	152.56		0.73215	144.65
0.733	152.63		0.73375	134.12		0.73295	152.56		0.73295	144.67
0.7337	152.51		0.73454	134.04		0.73375	152.57		0.73375	144.68
0.7345	152.39		0.73534	133.96		0.73454	152.62		0.73454	144.68
0.7353	152.3		0.73614	133.88		0.73534	152.66		0.73534	144.69
0.7361	152.23		0.73693	133.81		0.73614	152.67		0.73614	144.7
0.7369	152.18		0.73773	133.72		0.73693	152.69		0.73693	144.71
0.7377	152.15		0.73853	133.61		0.73773	152.69		0.73773	144.72
0.7385	152.14		0.73932	133.49		0.73853	152.68		0.73853	144.72
0.7393	152.13		0.74012	133.37		0.73932	152.68		0.73932	144.71
0.7401	152.14		0.74092	133.25		0.74012	152.69		0.74012	144.7
0.7409	152.15		0.74171	133.14		0.74092	152.7		0.74092	144.69
0.7417	152.17		0.74251	133.02		0.74171	152.72		0.74171	144.72
0.7425	152.19		0.74331	132.93		0.74251	152.73		0.74251	144.79
0.7433	152.2		0.7441	132.85		0.74331	152.75		0.74331	144.89
0.7441	152.21		0.7449	132.78		0.7441	152.75		0.7441	144.98
0.7449	152.22		0.7457	132.69		0.7449	152.74		0.7449	145.04
0.7457	152.22		0.74649	132.62		0.7457	152.73		0.7457	145.09
0.7465	152.21		0.74729	132.53		0.74649	152.7		0.74649	145.13
0.7473	152.19		0.74809	132.46		0.74729	152.65		0.74729	145.16
0.7481	152.17		0.74888	132.4		0.74809	152.65		0.74809	145.2
0.7489	152.15		0.74968	132.34		0.74888	152.69		0.74888	145.25
0.7497	152.15		0.75048	132.27		0.74968	152.76		0.74968	145.32
0.7505	152.15		0.75127	132.2		0.75048	152.86		0.75048	145.39
0.7513	152.15		0.75207	132.12		0.75127	152.96		0.75127	145.47
0.7521	152.16		0.75287	132.05		0.75207	153.06		0.75207	145.56
0.7529	152.18		0.75366	131.98		0.75287	153.16		0.75287	145.65
0.7537	152.19		0.75446	131.91		0.75366	153.26		0.75366	145.7
0.7545	152.18		0.75526	131.85		0.75446	153.33		0.75446	145.71
0.7553	152.17		0.75605	131.79		0.75526	153.34		0.75526	145.72
0.7561	152.15		0.75685	131.75		0.75605	153.31		0.75605	145.73
0.7569	152.13		0.75765	131.72		0.75685	153.28		0.75685	145.76
0.7576	152.11		0.75844	131.7		0.75765	153.27		0.75765	145.81
0.7584	152.08		0.75924	131.68		0.75844	153.27		0.75844	145.88
0.7592	152.05		0.76004	131.65		0.75924	153.29		0.75924	145.96
0.76	152.02		0.76083	131.64		0.76004	153.3		0.76004	146.04
0.7608	151.99		0.76163	131.64		0.76083	153.29		0.76083	146.1
0.7616	151.98		0.76243	131.64		0.76163	153.27		0.76163	146.14
0.7624	151.96		0.76322	131.63		0.76243	153.23		0.76243	146.15
0.7632	151.92		0.76402	131.64		0.76322	153.22		0.76322	146.14
0.764	151.88		0.76482	131.63		0.76402	153.23		0.76402	146.13
0.7648	151.84		0.76562	131.62		0.76482	153.27		0.76482	146.14
0.7656	151.8		0.76641	131.61		0.76562	153.29		0.76562	146.18
0.7664	151.78		0.76721	131.62		0.76641	153.32		0.76641	146.22
0.7672	151.76		0.76801	131.64		0.76721	153.36		0.76721	146.25
0.768	151.74		0.7688	131.68		0.76801	153.39		0.76801	146.28
0.7688	151.72		0.7696	131.71		0.7688	153.39		0.7688	146.33
0.7696	151.7		0.7704	131.74		0.7696	153.39		0.7696	146.38
0.7704	151.7		0.77119	131.75		0.7704	153.38		0.7704	146.43
0.7712	151.7		0.77199	131.75		0.77119	153.4		0.77119	146.48
0.772	151.71		0.77279	131.74		0.77199	153.41		0.77199	146.52
0.7728	151.73		0.77358	131.72		0.77279	153.44		0.77279	146.57
0.7736	151.73		0.77438	131.72		0.77358	153.45		0.77358	146.65
0.7744	151.72		0.77518	131.73		0.77438	153.44		0.77438	146.75
0.7752	151.7		0.77597	131.75		0.77518	153.45		0.77518	146.87
0.776	151.66		0.77677	131.75		0.77597	153.46		0.77597	146.95
0.7768	151.62		0.77757	131.76		0.77677	153.48		0.77677	147.04
0.7776	151.57		0.77836	131.76		0.77757	153.51		0.77757	147.12
0.7784	151.54		0.77916	131.77		0.77836	153.55		0.77836	147.2
0.7792	151.51		0.77996	131.77		0.77916	153.6		0.77916	147.28
0.78	151.48		0.78075	131.75		0.77996	153.66		0.77996	147.37
0.7808	151.44		0.78155	131.74		0.78075	153.7		0.78075	147.45
0.7815	151.4		0.78235	131.73		0.78155	153.71		0.78155	147.51
0.7823	151.36		0.78314	131.7		0.78235	153.7		0.78235	147.55
0.7831	151.33		0.78394	131.67		0.78314	153.67		0.78314	147.58
0.7839	151.3		0.78474	131.63		0.78394	153.62		0.78394	147.61
0.7847	151.27		0.78553	131.59		0.78474	153.56		0.78474	147.62
0.7855	151.24		0.78633	131.54		0.78553	153.52		0.78553	147.62
0.7863	151.21		0.78713	131.49		0.78633	153.5		0.78633	147.64
0.7871	151.19		0.78792	131.45		0.78713	153.51		0.78713	147.67
0.7879	151.17		0.78872	131.4		0.78792	153.52		0.78792	147.69
0.7887	151.15		0.78952	131.34		0.78872	153.54		0.78872	147.7
0.7895	151.15		0.79031	131.26		0.78952	153.55		0.78952	147.7
0.7903	151.16		0.79111	131.19		0.79031	153.54		0.79031	147.68
0.7911	151.19		0.79191	131.14		0.79111	153.54		0.79111	147.67
0.7919	151.23		0.7927	131.08		0.79191	153.51		0.79191	147.67
0.7927	151.28		0.7935	131.02		0.7927	153.48		0.7927	147.66
0.7935	151.35		0.7943	130.97		0.7935	153.46		0.7935	147.66
0.7943	151.42		0.79509	130.93		0.7943	153.45		0.7943	147.67
0.7951	151.49		0.79589	130.92		0.79509	153.42		0.79509	147.66
0.7959	151.54		0.79669	130.91		0.79589	153.4		0.79589	147.65
0.7967	151.58		0.79748	130.9		0.79669	153.38		0.79669	147.63
0.7975	151.6		0.79828	130.9		0.79748	153.39		0.79748	147.61
0.7983	151.59		0.79908	130.92		0.79828	153.42		0.79828	147.58
0.7991	151.55		0.79987	130.92		0.79908	153.46		0.79908	147.54
0.7999	151.51		0.80067	130.92		0.79987	153.54		0.79987	147.46
0.8007	151.46		0.80147	130.91		0.80067	153.6		0.80067	147.36
0.8015	151.39		0.80226	130.89		0.80147	153.68		0.80147	147.27
0.8023	151.31		0.80306	130.88		0.80226	153.77		0.80226	147.2
0.8031	151.25		0.80386	130.87		0.80306	153.85		0.80306	147.17
0.8039	151.2		0.80465	130.87		0.80386	153.91		0.80386	147.19
0.8047	151.17		0.80545	130.87		0.80465	153.97		0.80465	147.22
0.8054	151.16		0.80625	130.87		0.80545	154		0.80545	147.23
0.8062	151.15		0.80704	130.85		0.80625	154.03		0.80625	147.25
0.807	151.14		0.80784	130.84		0.80704	154.07		0.80704	147.28
0.8078	151.12		0.80864	130.85		0.80784	154.11		0.80784	147.31
0.8086	151.11		0.80943	130.87		0.80864	154.16		0.80864	147.34
0.8094	151.1		0.81023	130.9		0.80943	154.19		0.80943	147.36
0.8102	151.08		0.81103	130.97		0.81023	154.23		0.81023	147.39
0.811	151.07		0.81182	131.01		0.81103	154.29		0.81103	147.42
0.8118	151.09		0.81262	131.08		0.81182	154.35		0.81182	147.45
0.8126	151.14		0.81342	131.14		0.81262	154.4		0.81262	147.47
0.8134	151.21		0.81421	131.2		0.81342	154.42		0.81342	147.49
0.8142	151.3		0.81501	131.27		0.81421	154.42		0.81421	147.5
0.815	151.38		0.81581	131.34		0.81501	154.43		0.81501	147.51
0.8158	151.45		0.8166	131.4		0.81581	154.45		0.81581	147.52
0.8166	151.51		0.8174	131.47		0.8166	154.48		0.8166	147.54
0.8174	151.58		0.8182	131.55		0.8174	154.54		0.8174	147.56
0.8182	151.66		0.81899	131.63		0.8182	154.62		0.8182	147.58
0.819	151.75		0.81979	131.71		0.81899	154.7		0.81899	147.6
0.8198	151.84		0.82059	131.78		0.81979	154.77		0.81979	147.61
0.8206	151.92		0.82138	131.85		0.82059	154.84		0.82059	147.63
0.8214	151.98		0.82218	131.94		0.82138	154.9		0.82138	147.62
0.8222	152.01		0.82298	132		0.82218	154.96		0.82218	147.59
0.823	152.03		0.82377	132.05		0.82298	155.01		0.82298	147.54
0.8238	152.03		0.82457	132.1		0.82377	155.07		0.82377	147.5
0.8246	152.01		0.82537	132.16		0.82457	155.14		0.82457	147.46
0.8254	152		0.82616	132.19		0.82537	155.22		0.82537	147.42
0.8262	152		0.82696	132.24		0.82616	155.32		0.82616	147.37
0.827	152.03		0.82776	132.27		0.82696	155.42		0.82696	147.31
0.8278	152.06		0.82855	132.29		0.82776	155.49		0.82776	147.25
0.8286	152.1		0.82935	132.3		0.82855	155.55		0.82855	147.2
0.8293	152.13		0.83015	132.32		0.82935	155.59		0.82935	147.15
0.8301	152.14		0.83094	132.34		0.83015	155.64		0.83015	147.1
0.8309	152.15		0.83174	132.37		0.83094	155.7		0.83094	147.06
0.8317	152.16		0.83254	132.39		0.83174	155.76		0.83174	147.02
0.8325	152.18		0.83333	132.42		0.83254	155.79		0.83254	146.97
0.8333	152.23		0.83413	132.44		0.83333	155.83		0.83333	146.95
0.8341	152.3		0.83493	132.48		0.83413	155.88		0.83413	146.93
0.8349	152.39		0.83572	132.53		0.83493	155.96		0.83493	146.91
0.8357	152.5		0.83652	132.57		0.83572	156.07		0.83572	146.87
0.8365	152.61		0.83732	132.61		0.83652	156.17		0.83652	146.83
0.8373	152.71		0.83811	132.64		0.83732	156.23		0.83732	146.78
0.8381	152.81		0.83891	132.68		0.83811	156.26		0.83811	146.71
0.8389	152.91		0.83971	132.73		0.83891	156.26		0.83891	146.64
0.8397	153.02		0.8405	132.76		0.83971	156.24		0.83971	146.57
0.8405	153.15		0.8413	132.79		0.8405	156.22		0.8405	146.52
0.8413	153.31		0.8421	132.81		0.8413	156.22		0.8413	146.5
0.8421	153.51		0.84289	132.83		0.8421	156.22		0.8421	146.48
0.8429	153.72		0.84369	132.84		0.84289	156.21		0.84289	146.48
0.8437	153.93		0.84449	132.87		0.84369	156.2		0.84369	146.48
0.8445	154.13		0.84528	132.92		0.84449	156.17		0.84449	146.47
0.8453	154.31		0.84608	132.95		0.84528	156.14		0.84528	146.43
0.8461	154.46		0.84688	132.97		0.84608	156.1		0.84608	146.4
0.8469	154.6		0.84767	132.98		0.84688	156.06		0.84688	146.37
0.8477	154.74		0.84847	132.98		0.84767	156.01		0.84767	146.34
0.8485	154.89		0.84927	133.01		0.84847	155.97		0.84847	146.3
0.8493	155.05		0.85006	133.06		0.84927	155.95		0.84927	146.25
0.8501	155.2		0.85086	133.13		0.85006	155.94		0.85006	146.21
0.8509	155.35		0.85166	133.22		0.85086	155.93		0.85086	146.18
0.8517	155.47		0.85245	133.32		0.85166	155.9		0.85166	146.16
0.8525	155.57		0.85325	133.41		0.85245	155.88		0.85245	146.12
0.8533	155.7		0.85405	133.51		0.85325	155.86		0.85325	146.05
0.854	155.85		0.85484	133.59		0.85405	155.86		0.85405	145.96
0.8548	156		0.85564	133.69		0.85484	155.84		0.85484	145.86
0.8556	156.17		0.85644	133.8		0.85564	155.81		0.85564	145.79
0.8564	156.31		0.85723	133.91		0.85644	155.75		0.85644	145.73
0.8572	156.41		0.85803	134.05		0.85723	155.67		0.85723	145.68
0.858	156.47		0.85883	134.19		0.85803	155.57		0.85803	145.65
0.8588	156.51		0.85962	134.34		0.85883	155.47		0.85883	145.64
0.8596	156.54		0.86042	134.47		0.85962	155.37		0.85962	145.62
0.8604	156.59		0.86122	134.6		0.86042	155.29		0.86042	145.6
0.8612	156.66		0.86201	134.72		0.86122	155.24		0.86122	145.59
0.862	156.74		0.86281	134.85		0.86201	155.2		0.86201	145.57
0.8628	156.82		0.86361	134.99		0.86281	155.17		0.86281	145.54
0.8636	156.89		0.8644	135.13		0.86361	155.14		0.86361	145.49
0.8644	156.95		0.8652	135.25		0.8644	155.12		0.8644	145.45
0.8652	157.01		0.866	135.36		0.8652	155.1		0.8652	145.41
0.866	157.06		0.86679	135.47		0.866	155.09		0.866	145.36
0.8668	157.08		0.86759	135.58		0.86679	155.07		0.86679	145.31
0.8676	157.09		0.86839	135.7		0.86759	155.04		0.86759	145.27
0.8684	157.1		0.86918	135.83		0.86839	154.99		0.86839	145.22
0.8692	157.11		0.86998	135.96		0.86918	154.94		0.86918	145.19
0.87	157.11		0.87078	136.07		0.86998	154.92		0.86998	145.2
0.8708	157.09		0.87157	136.18		0.87078	154.92		0.87078	145.21
0.8716	157.09		0.87237	136.28		0.87157	154.94		0.87157	145.22
0.8724	157.1		0.87317	136.39		0.87237	154.97		0.87237	145.26
0.8732	157.12		0.87396	136.49		0.87317	154.97		0.87317	145.3
0.874	157.15		0.87476	136.58		0.87396	154.98		0.87396	145.33
0.8748	157.17		0.87556	136.65		0.87476	154.99		0.87476	145.38
0.8756	157.18		0.87635	136.72		0.87556	155		0.87556	145.4
0.8764	157.19		0.87715	136.79		0.87635	155.03		0.87635	145.4
0.8772	157.22		0.87795	136.88		0.87715	155.06		0.87715	145.38
0.8779	157.28		0.87874	136.96		0.87795	155.07		0.87795	145.37
0.8787	157.37		0.87954	137.05		0.87874	155.08		0.87874	145.36
0.8795	157.47		0.88034	137.14		0.87954	155.06		0.87954	145.38
0.8803	157.56		0.88113	137.23		0.88034	155.05		0.88034	145.4
0.8811	157.65		0.88193	137.33		0.88113	155.04		0.88113	145.4
0.8819	157.74		0.88273	137.42		0.88193	155.02		0.88193	145.4
0.8827	157.81		0.88352	137.5		0.88273	155		0.88273	145.37
0.8835	157.88		0.88432	137.55		0.88352	154.99		0.88352	145.34
0.8843	157.95		0.88512	137.59		0.88432	154.97		0.88432	145.32
0.8851	158.03		0.88591	137.62		0.88512	154.98		0.88512	145.32
0.8859	158.13		0.88671	137.66		0.88591	154.98		0.88591	145.32
0.8867	158.25		0.88751	137.69		0.88671	154.96		0.88671	145.3
0.8875	158.38		0.8883	137.7		0.88751	154.94		0.88751	145.29
0.8883	158.51		0.8891	137.71		0.8883	154.89		0.8883	145.3
0.8891	158.65		0.8899	137.72		0.8891	154.86		0.8891	145.33
0.8899	158.8		0.89069	137.7		0.8899	154.83		0.8899	145.36
0.8907	158.93		0.89149	137.69		0.89069	154.81		0.89069	145.39
0.8915	159.03		0.89229	137.7		0.89149	154.79		0.89149	145.45
0.8923	159.11		0.89308	137.71		0.89229	154.76		0.89229	145.5
0.8931	159.17		0.89388	137.7		0.89308	154.75		0.89308	145.58
0.8939	159.21		0.89468	137.7		0.89388	154.73		0.89388	145.66
0.8947	159.25		0.89547	137.69		0.89468	154.7		0.89468	145.72
0.8955	159.29		0.89627	137.69		0.89547	154.66		0.89547	145.75
0.8963	159.33		0.89707	137.68		0.89627	154.6		0.89627	145.77
0.8971	159.36		0.89786	137.66		0.89707	154.49		0.89707	145.78
0.8979	159.37		0.89866	137.64		0.89786	154.37		0.89786	145.79
0.8987	159.36		0.89946	137.63		0.89866	154.28		0.89866	145.79
0.8995	159.34		0.90025	137.64		0.89946	154.22		0.89946	145.79
0.9003	159.32		0.90105	137.65		0.90025	154.16		0.90025	145.79
0.9011	159.3		0.90185	137.67		0.90105	154.11		0.90105	145.8
0.9018	159.29		0.90264	137.7		0.90185	154.06		0.90185	145.81
0.9026	159.28		0.90344	137.75		0.90264	154.01		0.90264	145.83
0.9034	159.27		0.90424	137.79		0.90344	153.96		0.90344	145.85
0.9042	159.26		0.90504	137.84		0.90424	153.9		0.90424	145.88
0.905	159.25		0.90583	137.91		0.90504	153.81		0.90504	145.94
0.9058	159.23		0.90663	137.97		0.90583	153.71		0.90583	146
0.9066	159.19		0.90743	138.04		0.90663	153.62		0.90663	146.09
0.9074	159.14		0.90822	138.11		0.90743	153.55		0.90743	146.16
0.9082	159.08		0.90902	138.17		0.90822	153.5		0.90822	146.21
0.909	159.03		0.90982	138.22		0.90902	153.46		0.90902	146.26
0.9098	159		0.91061	138.26		0.90982	153.41		0.90982	146.31
0.9106	158.96		0.91141	138.3		0.91061	153.35		0.91061	146.36
0.9114	158.93		0.91221	138.34		0.91141	153.29		0.91141	146.41
0.9122	158.89		0.913	138.38		0.91221	153.25		0.91221	146.47
0.913	158.83		0.9138	138.43		0.913	153.2		0.913	146.52
0.9138	158.77		0.9146	138.45		0.9138	153.15		0.9138	146.59
0.9146	158.7		0.91539	138.47		0.9146	153.1		0.9146	146.66
0.9154	158.62		0.91619	138.49		0.91539	153.06		0.91539	146.72
0.9162	158.54		0.91699	138.51		0.91619	153.03		0.91619	146.78
0.917	158.46		0.91778	138.54		0.91699	153.02		0.91699	146.85
0.9178	158.38		0.91858	138.56		0.91778	153.02		0.91778	146.94
0.9186	158.3		0.91938	138.58		0.91858	153.01		0.91858	147.02
0.9194	158.2		0.92017	138.6		0.91938	153.03		0.91938	147.07
0.9202	158.07		0.92097	138.62		0.92017	153.05		0.92017	147.1
0.921	157.92		0.92177	138.63		0.92097	153.07		0.92097	147.11
0.9218	157.76		0.92256	138.65		0.92177	153.11		0.92177	147.11
0.9226	157.63		0.92336	138.66		0.92256	153.15		0.92256	147.1
0.9234	157.52		0.92416	138.65		0.92336	153.18		0.92336	147.1
0.9242	157.42		0.92495	138.63		0.92416	153.22		0.92416	147.12
0.925	157.33		0.92575	138.63		0.92495	153.27		0.92495	147.13
0.9257	157.26		0.92655	138.63		0.92575	153.32		0.92575	147.15
0.9265	157.21		0.92734	138.63		0.92655	153.37		0.92655	147.16
0.9273	157.16		0.92814	138.62		0.92734	153.44		0.92734	147.16
0.9281	157.11		0.92894	138.6		0.92814	153.5		0.92814	147.16
0.9289	157.04		0.92973	138.57		0.92894	153.54		0.92894	147.16
0.9297	156.96		0.93053	138.55		0.92973	153.56		0.92973	147.15
0.9305	156.87		0.93133	138.51		0.93053	153.58		0.93053	147.14
0.9313	156.78		0.93212	138.46		0.93133	153.64		0.93133	147.12
0.9321	156.71		0.93292	138.41		0.93212	153.69		0.93212	147.11
0.9329	156.65		0.93372	138.34		0.93292	153.75		0.93292	147.11
0.9337	156.58		0.93451	138.25		0.93372	153.8		0.93372	147.12
0.9345	156.52		0.93531	138.17		0.93451	153.84		0.93451	147.13
0.9353	156.47		0.93611	138.11		0.93531	153.87		0.93531	147.17
0.9361	156.43		0.9369	138.05		0.93611	153.91		0.93611	147.2
0.9369	156.41		0.9377	137.98		0.9369	153.98		0.9369	147.23
0.9377	156.4		0.9385	137.9		0.9377	154.07		0.9377	147.23
0.9385	156.4		0.93929	137.82		0.9385	154.17		0.9385	147.21
0.9393	156.4		0.94009	137.75		0.93929	154.25		0.93929	147.19
0.9401	156.39		0.94089	137.67		0.94009	154.31		0.94009	147.17
0.9409	156.37		0.94168	137.6		0.94089	154.36		0.94089	147.16
0.9417	156.33		0.94248	137.53		0.94168	154.41		0.94168	147.16
0.9425	156.27		0.94328	137.43		0.94248	154.47		0.94248	147.17
0.9433	156.21		0.94407	137.34		0.94328	154.53		0.94328	147.19
0.9441	156.17		0.94487	137.26		0.94407	154.59		0.94407	147.21
0.9449	156.15		0.94567	137.16		0.94487	154.63		0.94487	147.22
0.9457	156.15		0.94646	137.04		0.94567	154.66		0.94567	147.24
0.9465	156.15		0.94726	136.92		0.94646	154.7		0.94646	147.25
0.9473	156.14		0.94806	136.78		0.94726	154.75		0.94726	147.26
0.9481	156.12		0.94885	136.67		0.94806	154.83		0.94806	147.29
0.9489	156.1		0.94965	136.61		0.94885	154.93		0.94885	147.3
0.9496	156.09		0.95045	136.58		0.94965	155.02		0.94965	147.3
0.9504	156.12		0.95124	136.55		0.95045	155.08		0.95045	147.29
0.9512	156.15		0.95204	136.54		0.95124	155.12		0.95124	147.26
0.952	156.17		0.95284	136.53		0.95204	155.13		0.95204	147.22
0.9528	156.18		0.95363	136.52		0.95284	155.15		0.95284	147.2
0.9536	156.17		0.95443	136.52		0.95363	155.15		0.95363	147.2
0.9544	156.16		0.95523	136.5		0.95443	155.14		0.95443	147.21
0.9552	156.15		0.95602	136.49		0.95523	155.11		0.95523	147.23
0.956	156.12		0.95682	136.48		0.95602	155.07		0.95602	147.26
0.9568	156.08		0.95762	136.45		0.95682	155.01		0.95682	147.31
0.9576	156.01		0.95841	136.42		0.95762	154.97		0.95762	147.34
0.9584	155.93		0.95921	136.37		0.95841	154.95		0.95841	147.36
0.9592	155.86		0.96001	136.34		0.95921	154.97		0.95921	147.37
0.96	155.83		0.9608	136.33		0.96001	154.99		0.96001	147.38
0.9608	155.83		0.9616	136.31		0.9608	154.99		0.9608	147.4
0.9616	155.86		0.9624	136.3		0.9616	155		0.9616	147.41
0.9624	155.9		0.96319	136.29		0.9624	154.98		0.9624	147.43
0.9632	155.94		0.96399	136.29		0.96319	154.95		0.96319	147.45
0.964	155.96		0.96479	136.31		0.96399	154.92		0.96399	147.46
0.9648	155.97		0.96558	136.33		0.96479	154.89		0.96479	147.46
0.9656	155.96		0.96638	136.35		0.96558	154.85		0.96558	147.47
0.9664	155.93		0.96718	136.36		0.96638	154.84		0.96638	147.49
0.9672	155.89		0.96797	136.38		0.96718	154.81		0.96718	147.51
0.968	155.83		0.96877	136.39		0.96797	154.82		0.96797	147.51
0.9688	155.76		0.96957	136.4		0.96877	154.81		0.96877	147.5
0.9696	155.69		0.97036	136.43		0.96957	154.79		0.96957	147.48
0.9704	155.64		0.97116	136.46		0.97036	154.75		0.97036	147.41
0.9712	155.6		0.97196	136.45		0.97116	154.72		0.97116	147.31
0.972	155.58		0.97275	136.44		0.97196	154.69		0.97196	147.21
0.9728	155.57		0.97355	136.45		0.97275	154.66		0.97275	147.09
0.9736	155.55		0.97435	136.45		0.97355	154.66		0.97355	146.99
0.9743	155.52		0.97514	136.47		0.97435	154.67		0.97435	146.89
0.9751	155.49		0.97594	136.49		0.97514	154.68		0.97514	146.85
0.9759	155.45		0.97674	136.51		0.97594	154.68		0.97594	146.83
0.9767	155.41		0.97753	136.54		0.97674	154.7		0.97674	146.81
0.9775	155.37		0.97833	136.58		0.97753	154.72		0.97753	146.81
0.9783	155.32		0.97913	136.61		0.97833	154.68		0.97833	146.83
0.9791	155.27		0.97992	136.64		0.97913	154.63		0.97913	146.85
0.9799	155.21		0.98072	136.67		0.97992	154.57		0.97992	146.86
0.9807	155.15		0.98152	136.67		0.98072	154.5		0.98072	146.88
0.9815	155.09		0.98231	136.68		0.98152	154.46		0.98152	146.92
0.9823	155.05		0.98311	136.68		0.98231	154.45		0.98231	146.95
0.9831	155.04		0.98391	136.68		0.98311	154.45		0.98311	146.97
0.9839	155.07		0.9847	136.68		0.98391	154.45		0.98391	146.98
0.9847	155.1		0.9855	136.68		0.9847	154.47		0.9847	146.94
0.9855	155.14		0.9863	136.69		0.9855	154.51		0.9855	146.91
0.9863	155.16		0.98709	136.7		0.9863	154.55		0.9863	146.86
0.9871	155.17		0.98789	136.71		0.98709	154.57		0.98709	146.83
0.9879	155.18		0.98869	136.73		0.98789	154.58		0.98789	146.81
0.9887	155.19		0.98948	136.76		0.98869	154.6		0.98869	146.79
0.9895	155.2		0.99028	136.8		0.98948	154.61		0.98948	146.78
0.9903	155.23		0.99108	136.86		0.99028	154.61		0.99028	146.79
0.9911	155.27		0.99187	136.91		0.99108	154.58		0.99108	146.8
0.9919	155.32		0.99267	136.97		0.99187	154.54		0.99187	146.8
0.9927	155.38		0.99347	137.05		0.99267	154.52		0.99267	146.82
0.9935	155.43		0.99426	137.14		0.99347	154.52		0.99347	146.83
0.9943	155.47		0.99506	137.23		0.99426	154.51		0.99426	146.83
0.9951	155.51		0.99586	137.33		0.99506	154.48		0.99506	146.84
0.9959	155.54		0.99665	137.43		0.99586	154.44		0.99586	146.82
0.9967	155.57		0.99745	137.53		0.99665	154.4		0.99665	146.78
0.9975	155.61		0.99825	137.62		0.99745	154.38		0.99745	146.72
0.9982	155.65		0.99904	137.72		0.99825	154.38		0.99825	146.66
0.999	155.7		0.99984	137.83		0.99904	154.39		0.99904	146.6
0.9998	155.77		1.00064	137.94		0.99984	154.43		0.99984	146.55
1.0006	155.84		1.00143	138.06		1.00064	154.47		1.00064	146.51
1.0014	155.89		1.00223	138.18		1.00143	154.5		1.00143	146.5
1.0022	155.91		1.00303	138.3		1.00223	154.52		1.00223	146.5
1.003	155.91		1.00382	138.43		1.00303	154.53		1.00303	146.52
1.0038	155.9		1.00462	138.56		1.00382	154.53		1.00382	146.54
1.0046	155.88		1.00542	138.68		1.00462	154.51		1.00462	146.58
1.0054	155.84		1.00621	138.82		1.00542	154.49		1.00542	146.59
1.0062	155.79		1.00701	138.95		1.00621	154.46		1.00621	146.61
1.007	155.74		1.00781	139.1		1.00701	154.42		1.00701	146.63
1.0078	155.68		1.0086	139.24		1.00781	154.39		1.00781	146.64
1.0086	155.62		1.0094	139.39		1.0086	154.37		1.0086	146.65
1.0094	155.57		1.0102	139.54		1.0094	154.36		1.0094	146.67
1.0102	155.5		1.01099	139.7		1.0102	154.33		1.0102	146.68
1.011	155.43		1.01179	139.87		1.01099	154.28		1.01099	146.7
1.0118	155.34		1.01259	140.04		1.01179	154.24		1.01179	146.72
1.0126	155.22		1.01338	140.23		1.01259	154.2		1.01259	146.74
1.0134	155.1		1.01418	140.43		1.01338	154.18		1.01338	146.75
1.0142	154.98		1.01498	140.62		1.01418	154.17		1.01418	146.75
1.015	154.86		1.01577	140.81		1.01498	154.16		1.01498	146.7
1.0158	154.76		1.01657	141		1.01577	154.17		1.01577	146.63
1.0166	154.7		1.01737	141.18		1.01657	154.15		1.01657	146.56
1.0174	154.67		1.01816	141.35		1.01737	154.13		1.01737	146.51
1.0182	154.65		1.01896	141.52		1.01816	154.1		1.01816	146.47
1.019	154.61		1.01976	141.69		1.01896	154.06		1.01896	146.44
1.0198	154.56		1.02055	141.88		1.01976	154.02		1.01976	146.43
1.0206	154.51		1.02135	142.07		1.02055	153.99		1.02055	146.43
1.0214	154.48		1.02215	142.27		1.02135	153.96		1.02135	146.44
1.0221	154.46		1.02294	142.49		1.02215	153.93		1.02215	146.43
1.0229	154.45		1.02374	142.7		1.02294	153.93		1.02294	146.41
1.0237	154.44		1.02454	142.93		1.02374	153.92		1.02374	146.39
1.0245	154.43		1.02533	143.17		1.02454	153.91		1.02454	146.39
1.0253	154.42		1.02613	143.44		1.02533	153.89		1.02533	146.4
1.0261	154.42		1.02693	143.71		1.02613	153.86		1.02613	146.43
1.0269	154.44		1.02772	143.99		1.02693	153.83		1.02693	146.46
1.0277	154.47		1.02852	144.24		1.02772	153.77		1.02772	146.47
1.0285	154.49		1.02932	144.44		1.02852	153.69		1.02852	146.48
1.0293	154.48		1.03011	144.62		1.02932	153.63		1.02932	146.47
1.0301	154.43		1.03091	144.79		1.03011	153.59		1.03011	146.47
1.0309	154.36		1.03171	144.95		1.03091	153.56		1.03091	146.47
1.0317	154.26		1.0325	145.09		1.03171	153.55		1.03171	146.45
1.0325	154.14		1.0333	145.25		1.0325	153.55		1.0325	146.4
1.0333	154.03		1.0341	145.41		1.0333	153.54		1.0333	146.34
1.0341	153.93		1.03489	145.59		1.0341	153.54		1.0341	146.28
1.0349	153.86		1.03569	145.75		1.03489	153.53		1.03489	146.24
1.0357	153.84		1.03649	145.89		1.03569	153.52		1.03569	146.24
1.0365	153.83		1.03728	146.04		1.03649	153.52		1.03649	146.25
1.0373	153.82		1.03808	146.18		1.03728	153.51		1.03728	146.25
1.0381	153.8		1.03888	146.34		1.03808	153.49		1.03808	146.25
1.0389	153.77		1.03967	146.49		1.03888	153.44		1.03888	146.24
1.0397	153.72		1.04047	146.63		1.03967	153.41		1.03967	146.23
1.0405	153.64		1.04127	146.78		1.04047	153.4		1.04047	146.22
1.0413	153.54		1.04207	146.9		1.04127	153.39		1.04127	146.23
1.0421	153.45		1.04286	147.02		1.04207	153.39		1.04207	146.23
1.0429	153.37		1.04366	147.15		1.04286	153.4		1.04286	146.22
1.0437	153.31		1.04446	147.25		1.04366	153.41		1.04366	146.2
1.0445	153.25		1.04525	147.36		1.04446	153.42		1.04446	146.18
1.0453	153.19		1.04605	147.47		1.04525	153.43		1.04525	146.14
1.046	153.13		1.04685	147.59		1.04605	153.41		1.04605	146.08
1.0468	153.07		1.04764	147.71		1.04685	153.4		1.04685	146.01
1.0476	153.01		1.04844	147.84		1.04764	153.37		1.04764	145.95
1.0484	152.96		1.04924	147.98		1.04844	153.37		1.04844	145.89
1.0492	152.91		1.05003	148.1		1.04924	153.36		1.04924	145.84
1.05	152.85		1.05083	148.21		1.05003	153.34		1.05003	145.85
1.0508	152.77		1.05163	148.35		1.05083	153.31		1.05083	145.86
1.0516	152.66		1.05242	148.48		1.05163	153.27		1.05163	145.9
1.0524	152.53		1.05322	148.61		1.05242	153.24		1.05242	145.95
1.0532	152.42		1.05402	148.74		1.05322	153.2		1.05322	146
1.054	152.33		1.05481	148.86		1.05402	153.16		1.05402	146.06
1.0548	152.25		1.05561	148.99		1.05481	153.14		1.05481	146.08
1.0556	152.18		1.05641	149.13		1.05561	153.13		1.05561	146.07
1.0564	152.13		1.0572	149.25		1.05641	153.15		1.05641	146.05
1.0572	152.09		1.058	149.37		1.0572	153.17		1.0572	146
1.058	152.07		1.0588	149.49		1.058	153.22		1.058	145.94
1.0588	152.05		1.05959	149.59		1.0588	153.28		1.0588	145.87
1.0596	152.04		1.06039	149.68		1.05959	153.34		1.05959	145.8
1.0604	152.03		1.06119	149.78		1.06039	153.4		1.06039	145.72
1.0612	152.01		1.06198	149.88		1.06119	153.44		1.06119	145.64
1.062	151.97		1.06278	149.98		1.06198	153.46		1.06198	145.58
1.0628	151.91		1.06358	150.08		1.06278	153.46		1.06278	145.54
1.0636	151.82		1.06437	150.17		1.06358	153.45		1.06358	145.53
1.0644	151.73		1.06517	150.27		1.06437	153.43		1.06437	145.55
1.0652	151.62		1.06597	150.35		1.06517	153.38		1.06517	145.56
1.066	151.52		1.06676	150.42		1.06597	153.33		1.06597	145.58
1.0668	151.43		1.06756	150.49		1.06676	153.28		1.06676	145.57
1.0676	151.35		1.06836	150.56		1.06756	153.22		1.06756	145.56
1.0684	151.28		1.06915	150.65		1.06836	153.16		1.06836	145.54
1.0692	151.22		1.06995	150.73		1.06915	153.12		1.06915	145.51
1.0699	151.17		1.07075	150.79		1.06995	153.09		1.06995	145.46
1.0707	151.1		1.07154	150.87		1.07075	153.09		1.07075	145.39
1.0715	151.02		1.07234	150.94		1.07154	153.08		1.07154	145.31
1.0723	150.94		1.07314	151		1.07234	153.05		1.07234	145.21
1.0731	150.89		1.07393	151.06		1.07314	153.01		1.07314	145.11
1.0739	150.87		1.07473	151.11		1.07393	152.99		1.07393	145.01
1.0747	150.86		1.07553	151.16		1.07473	152.99		1.07473	144.92
1.0755	150.85		1.07632	151.22		1.07553	153.01		1.07553	144.86
1.0763	150.84		1.07712	151.25		1.07632	153.04		1.07632	144.8
1.0771	150.81		1.07792	151.3		1.07712	153.05		1.07712	144.76
1.0779	150.78		1.07871	151.34		1.07792	153.05		1.07792	144.71
1.0787	150.73		1.07951	151.37		1.07871	153.04		1.07871	144.69
1.0795	150.67		1.08031	151.4		1.07951	153.02		1.07951	144.66
1.0803	150.6		1.0811	151.43		1.08031	152.99		1.08031	144.63
1.0811	150.54		1.0819	151.48		1.0811	152.97		1.0811	144.59
1.0819	150.49		1.0827	151.54		1.0819	152.96		1.0819	144.55
1.0827	150.46		1.08349	151.6		1.0827	152.95		1.0827	144.5
1.0835	150.45		1.08429	151.65		1.08349	152.96		1.08349	144.44
1.0843	150.46		1.08509	151.7		1.08429	152.99		1.08429	144.38
1.0851	150.5		1.08588	151.75		1.08509	153.03		1.08509	144.34
1.0859	150.54		1.08668	151.83		1.08588	153.08		1.08588	144.28
1.0867	150.58		1.08748	151.91		1.08668	153.13		1.08668	144.23
1.0875	150.64		1.08827	152		1.08748	153.2		1.08748	144.2
1.0883	150.71		1.08907	152.08		1.08827	153.25		1.08827	144.17
1.0891	150.76		1.08987	152.13		1.08907	153.31		1.08907	144.14
1.0899	150.82		1.09066	152.17		1.08987	153.37		1.08987	144.12
1.0907	150.89		1.09146	152.19		1.09066	153.43		1.09066	144.11
1.0915	150.98		1.09226	152.21		1.09146	153.46		1.09146	144.1
1.0923	151.08		1.09305	152.23		1.09226	153.49		1.09226	144.09
1.0931	151.17		1.09385	152.26		1.09305	153.51		1.09305	144.08
1.0938	151.26		1.09465	152.29		1.09385	153.53		1.09385	144.07
1.0946	151.35		1.09544	152.3		1.09465	153.56		1.09465	144.06
1.0954	151.43		1.09624	152.31		1.09544	153.58		1.09544	144.05
1.0962	151.48		1.09704	152.33		1.09624	153.61		1.09624	144.03
1.097	151.51		1.09783	152.37		1.09704	153.63		1.09704	144
1.0978	151.54		1.09863	152.41		1.09783	153.65		1.09783	143.97
1.0986	151.6		1.09943	152.47		1.09863	153.68		1.09863	143.94
1.0994	151.68		1.10022	152.51		1.09943	153.73		1.09943	143.89
1.1002	151.77		1.10102	152.55		1.10022	153.77		1.10022	143.83
1.101	151.87		1.10182	152.58		1.10102	153.83		1.10102	143.77
1.1018	151.98		1.10261	152.6		1.10182	153.88		1.10182	143.74
1.1026	152.07		1.10341	152.62		1.10261	153.9		1.10261	143.73
1.1034	152.13		1.10421	152.63		1.10341	153.91		1.10341	143.73
1.1042	152.16		1.105	152.65		1.10421	153.9		1.10421	143.71
1.105	152.17		1.1058	152.66		1.105	153.9		1.105	143.68
1.1058	152.19		1.1066	152.68		1.1058	153.88		1.1058	143.63
1.1066	152.21		1.10739	152.69		1.1066	153.86		1.1066	143.59
1.1074	152.23		1.10819	152.7		1.10739	153.86		1.10739	143.57
1.1082	152.24		1.10899	152.73		1.10819	153.86		1.10819	143.57
1.109	152.27		1.10978	152.76		1.10899	153.83		1.10899	143.58
1.1098	152.34		1.11058	152.8		1.10978	153.8		1.10978	143.58
1.1106	152.44		1.11138	152.83		1.11058	153.77		1.11058	143.57
1.1114	152.59		1.11217	152.88		1.11138	153.76		1.11138	143.57
1.1122	152.77		1.11297	152.9		1.11217	153.75		1.11217	143.58
1.113	152.94		1.11377	152.9		1.11297	153.75		1.11297	143.6
1.1138	153.08		1.11456	152.89		1.11377	153.74		1.11377	143.62
1.1146	153.18		1.11536	152.88		1.11456	153.74		1.11456	143.64
1.1154	153.23		1.11616	152.88		1.11536	153.73		1.11536	143.62
1.1162	153.28		1.11695	152.87		1.11616	153.72		1.11616	143.59
1.117	153.34		1.11775	152.89		1.11695	153.69		1.11695	143.57
1.1178	153.41		1.11855	152.9		1.11775	153.65		1.11775	143.54
1.1185	153.46		1.11934	152.91		1.11855	153.59		1.11855	143.51
1.1193	153.49		1.12014	152.93		1.11934	153.54		1.11934	143.48
1.1201	153.52		1.12094	152.95		1.12014	153.47		1.12014	143.46
1.1209	153.52		1.12173	152.99		1.12094	153.41		1.12094	143.44
1.1217	153.49		1.12253	153.03		1.12173	153.38		1.12173	143.44
1.1225	153.44		1.12333	153.07		1.12253	153.34		1.12253	143.45
1.1233	153.4		1.12412	153.13		1.12333	153.3		1.12333	143.46
1.1241	153.39		1.12492	153.18		1.12412	153.27		1.12412	143.46
1.1249	153.4		1.12572	153.23		1.12492	153.25		1.12492	143.46
1.1257	153.41		1.12651	153.27		1.12572	153.23		1.12572	143.48
1.1265	153.44		1.12731	153.31		1.12651	153.19		1.12651	143.49
1.1273	153.49		1.12811	153.34		1.12731	153.14		1.12731	143.5
1.1281	153.53		1.1289	153.36		1.12811	153.07		1.12811	143.5
1.1289	153.57		1.1297	153.39		1.1289	153.02		1.1289	143.48
1.1297	153.62		1.1305	153.43		1.1297	152.96		1.1297	143.45
1.1305	153.7		1.13129	153.46		1.1305	152.91		1.1305	143.42
1.1313	153.8		1.13209	153.52		1.13129	152.87		1.13129	143.39
1.1321	153.92		1.13289	153.57		1.13209	152.83		1.13209	143.36
1.1329	154.03		1.13368	153.63		1.13289	152.79		1.13289	143.31
1.1337	154.13		1.13448	153.68		1.13368	152.75		1.13368	143.24
1.1345	154.23		1.13528	153.7		1.13448	152.72		1.13448	143.16
1.1353	154.34		1.13607	153.73		1.13528	152.72		1.13528	143.09
1.1361	154.42		1.13687	153.78		1.13607	152.69		1.13607	143.04
1.1369	154.49		1.13767	153.83		1.13687	152.68		1.13687	143.02
1.1377	154.53		1.13846	153.87		1.13767	152.67		1.13767	143.02
1.1385	154.56		1.13926	153.89		1.13846	152.64		1.13846	143.04
1.1393	154.59		1.14006	153.93		1.13926	152.62		1.13926	143.07
1.1401	154.62		1.14085	153.96		1.14006	152.62		1.14006	143.1
1.1409	154.66		1.14165	153.98		1.14085	152.62		1.14085	143.11
1.1417	154.71		1.14245	154		1.14165	152.61		1.14165	143.13
1.1424	154.77		1.14324	154		1.14245	152.61		1.14245	143.13
1.1432	154.83		1.14404	154		1.14324	152.61		1.14324	143.12
1.144	154.89		1.14484	153.98		1.14404	152.64		1.14404	143.11
1.1448	154.96		1.14563	153.97		1.14484	152.68		1.14484	143.13
1.1456	155.02		1.14643	154		1.14563	152.72		1.14563	143.15
1.1464	155.08		1.14723	154.03		1.14643	152.76		1.14643	143.19
1.1472	155.1		1.14802	154.07		1.14723	152.8		1.14723	143.2
1.148	155.07		1.14882	154.09		1.14802	152.83		1.14802	143.22
1.1488	155.02		1.14962	154.12		1.14882	152.83		1.14882	143.23
1.1496	154.97		1.15041	154.16		1.14962	152.82		1.14962	143.22
1.1504	154.94		1.15121	154.2		1.15041	152.8		1.15041	143.22
1.1512	154.94		1.15201	154.24		1.15121	152.81		1.15121	143.23
1.152	154.95		1.1528	154.28		1.15201	152.82		1.15201	143.23
1.1528	154.93		1.1536	154.34		1.1528	152.83		1.1528	143.22
1.1536	154.86		1.1544	154.4		1.1536	152.83		1.1536	143.2
1.1544	154.77		1.15519	154.46		1.1544	152.81		1.1544	143.17
1.1552	154.68		1.15599	154.52		1.15519	152.78		1.15519	143.13
1.156	154.6		1.15679	154.59		1.15599	152.75		1.15599	143.1
1.1568	154.54		1.15758	154.64		1.15679	152.72		1.15679	143.07
1.1576	154.48		1.15838	154.7		1.15758	152.7		1.15758	143.07
1.1584	154.43		1.15918	154.74		1.15838	152.69		1.15838	143.05
1.1592	154.38		1.15997	154.78		1.15918	152.68		1.15918	143.04
1.16	154.31		1.16077	154.83		1.15997	152.67		1.15997	143.01
1.1608	154.24		1.16157	154.85		1.16077	152.67		1.16077	142.96
1.1616	154.17		1.16236	154.88		1.16157	152.66		1.16157	142.91
1.1624	154.09		1.16316	154.91		1.16236	152.65		1.16236	142.85
1.1632	154.01		1.16396	154.95		1.16316	152.64		1.16316	142.8
1.164	153.93		1.16475	154.98		1.16396	152.61		1.16396	142.76
1.1648	153.84		1.16555	155.01		1.16475	152.56		1.16475	142.72
1.1656	153.76		1.16635	155.01		1.16555	152.51		1.16555	142.72
1.1663	153.7		1.16714	155.01		1.16635	152.44		1.16635	142.71
1.1671	153.64		1.16794	155.01		1.16714	152.35		1.16714	142.7
1.1679	153.59		1.16874	155.02		1.16794	152.26		1.16794	142.7
1.1687	153.54		1.16953	155.04		1.16874	152.18		1.16874	142.7
1.1695	153.49		1.17033	155.07		1.16953	152.12		1.16953	142.71
1.1703	153.42		1.17113	155.11		1.17033	152.07		1.17033	142.71
1.1711	153.35		1.17192	155.15		1.17113	152.03		1.17113	142.71
1.1719	153.29		1.17272	155.19		1.17192	152		1.17192	142.72
1.1727	153.26		1.17352	155.23		1.17272	151.96		1.17272	142.75
1.1735	153.24		1.17431	155.26		1.17352	151.93		1.17352	142.8
1.1743	153.22		1.17511	155.31		1.17431	151.88		1.17431	142.85
1.1751	153.21		1.17591	155.36		1.17511	151.83		1.17511	142.91
1.1759	153.2		1.1767	155.41		1.17591	151.8		1.17591	142.98
1.1767	153.19		1.1775	155.45		1.1767	151.75		1.1767	143.06
1.1775	153.17		1.1783	155.51		1.1775	151.7		1.1775	143.13
1.1783	153.14		1.17909	155.56		1.1783	151.63		1.1783	143.19
1.1791	153.11		1.17989	155.6		1.17909	151.53		1.17909	143.25
1.1799	153.08		1.18069	155.63		1.17989	151.41		1.17989	143.3
1.1807	153.06		1.18149	155.66		1.18069	151.28		1.18069	143.34
1.1815	153.02		1.18228	155.67		1.18149	151.14		1.18149	143.36
1.1823	152.96		1.18308	155.68		1.18228	151.03		1.18228	143.37
1.1831	152.9		1.18388	155.7		1.18308	150.93		1.18308	143.38
1.1839	152.85		1.18467	155.71		1.18388	150.85		1.18388	143.4
1.1847	152.81		1.18547	155.73		1.18467	150.77		1.18467	143.41
1.1855	152.78		1.18627	155.76		1.18547	150.73		1.18547	143.42
1.1863	152.76		1.18706	155.79		1.18627	150.69		1.18627	143.41
1.1871	152.75		1.18786	155.82		1.18706	150.65		1.18706	143.41
1.1879	152.75		1.18866	155.83		1.18786	150.62		1.18786	143.4
1.1887	152.75		1.18945	155.84		1.18866	150.6		1.18866	143.4
1.1895	152.72		1.19025	155.85		1.18945	150.58		1.18945	143.41
1.1902	152.67		1.19105	155.88		1.19025	150.56		1.19025	143.43
1.191	152.6		1.19184	155.9		1.19105	150.53		1.19105	143.45
1.1918	152.51		1.19264	155.93		1.19184	150.5		1.19184	143.48
1.1926	152.42		1.19344	155.97		1.19264	150.47		1.19264	143.49
1.1934	152.36		1.19423	156		1.19344	150.43		1.19344	143.49
1.1942	152.34		1.19503	156.05		1.19423	150.41		1.19423	143.49
1.195	152.34		1.19583	156.11		1.19503	150.39		1.19503	143.51
1.1958	152.35		1.19662	156.16		1.19583	150.37		1.19583	143.52
1.1966	152.36		1.19742	156.2		1.19662	150.34		1.19662	143.53
1.1974	152.36		1.19822	156.24		1.19742	150.3		1.19742	143.55
1.1982	152.36		1.19901	156.29		1.19822	150.28		1.19822	143.56
1.199	152.36		1.19981	156.32		1.19901	150.25		1.19901	143.57
1.1998	152.37		1.20061	156.35		1.19981	150.24		1.19981	143.58
1.2006	152.42		1.2014	156.37		1.20061	150.23		1.20061	143.57
1.2014	152.48		1.2022	156.38		1.2014	150.21		1.2014	143.54
1.2022	152.53		1.203	156.38		1.2022	150.19		1.2022	143.49
1.203	152.55		1.20379	156.37		1.203	150.16		1.203	143.45
1.2038	152.54		1.20459	156.34		1.20379	150.1		1.20379	143.42
1.2046	152.52		1.20539	156.29		1.20459	150.01		1.20459	143.41
1.2054	152.52		1.20618	156.25		1.20539	149.9		1.20539	143.42
1.2062	152.51		1.20698	156.19		1.20618	149.78		1.20618	143.44
1.207	152.49		1.20778	156.15		1.20698	149.68		1.20698	143.45
1.2078	152.48		1.20857	156.11		1.20778	149.6		1.20778	143.47
1.2086	152.49		1.20937	156.07		1.20857	149.53		1.20857	143.5
1.2094	152.51		1.21017	156.02		1.20937	149.5		1.20937	143.54
1.2102	152.54		1.21096	155.96		1.21017	149.49		1.21017	143.59
1.211	152.59		1.21176	155.84		1.21096	149.49		1.21096	143.64
1.2118	152.65		1.21256	155.7		1.21176	149.5		1.21176	143.68
1.2126	152.72		1.21335	155.53		1.21256	149.51		1.21256	143.74
1.2134	152.8		1.21415	155.36		1.21335	149.52		1.21335	143.81
1.2141	152.87		1.21495	155.18		1.21415	149.52		1.21415	143.89
1.2149	152.91		1.21574	154.96		1.21495	149.49		1.21495	143.97
1.2157	152.93		1.21654	154.68		1.21574	149.47		1.21574	144.05
1.2165	152.92		1.21734	154.4		1.21654	149.43		1.21654	144.11
1.2173	152.91		1.21813	154.18		1.21734	149.4		1.21734	144.15
1.2181	152.92		1.21893	154.03		1.21813	149.38		1.21813	144.17
1.2189	152.93		1.21973	153.89		1.21893	149.34		1.21893	144.18
1.2197	152.94		1.22052	153.79		1.21973	149.28		1.21973	144.19
1.2205	152.95		1.22132	153.72		1.22052	149.2		1.22052	144.21
1.2213	152.96		1.22212	153.67		1.22132	149.13		1.22132	144.21
1.2221	152.96		1.22291	153.66		1.22212	149.08		1.22212	144.21
1.2229	152.97		1.22371	153.67		1.22291	149.04		1.22291	144.2
1.2237	152.99		1.22451	153.7		1.22371	148.99		1.22371	144.19
1.2245	153		1.2253	153.75		1.22451	148.93		1.22451	144.16
1.2253	153.04		1.2261	153.77		1.2253	148.87		1.2253	144.14
1.2261	153.09		1.2269	153.8		1.2261	148.82		1.2261	144.11
1.2269	153.16		1.22769	153.8		1.2269	148.79		1.2269	144.1
1.2277	153.25		1.22849	153.81		1.22769	148.77		1.22769	144.08
1.2285	153.36		1.22929	153.81		1.22849	148.76		1.22849	144.07
1.2293	153.47		1.23008	153.8		1.22929	148.77		1.22929	144.08
1.2301	153.56		1.23088	153.79		1.23008	148.79		1.23008	144.1
1.2309	153.62		1.23168	153.77		1.23088	148.79		1.23088	144.12
1.2317	153.66		1.23247	153.76		1.23168	148.81		1.23168	144.15
1.2325	153.69		1.23327	153.72		1.23247	148.83		1.23247	144.19
1.2333	153.74		1.23407	153.69		1.23327	148.84		1.23327	144.24
1.2341	153.8		1.23486	153.64		1.23407	148.86		1.23407	144.29
1.2349	153.87		1.23566	153.58		1.23486	148.87		1.23486	144.33
1.2357	153.94		1.23646	153.52		1.23566	148.87		1.23566	144.36
1.2365	154.01		1.23725	153.47		1.23646	148.87		1.23646	144.38
1.2373	154.08		1.23805	153.42		1.23725	148.88		1.23725	144.38
1.238	154.16		1.23885	153.39		1.23805	148.87		1.23805	144.4
1.2388	154.24		1.23964	153.35		1.23885	148.85		1.23885	144.43
1.2396	154.35		1.24044	153.3		1.23964	148.83		1.23964	144.49
1.2404	154.47		1.24124	153.26		1.24044	148.78		1.24044	144.58
1.2412	154.6		1.24203	153.2		1.24124	148.74		1.24124	144.67
1.242	154.72		1.24283	153.14		1.24203	148.72		1.24203	144.75
1.2428	154.82		1.24363	153.08		1.24283	148.67		1.24283	144.81
1.2436	154.9		1.24442	153.03		1.24363	148.62		1.24363	144.87
1.2444	154.95		1.24522	152.98		1.24442	148.58		1.24442	144.92
1.2452	154.97		1.24602	152.95		1.24522	148.55		1.24522	144.94
1.246	154.96		1.24681	152.92		1.24602	148.53		1.24602	144.96
1.2468	154.94		1.24761	152.9		1.24681	148.53		1.24681	144.98
1.2476	154.92		1.24841	152.86		1.24761	148.54		1.24761	144.99
1.2484	154.91		1.2492	152.81		1.24841	148.53		1.24841	145
1.2492	154.91		1.25	152.77		1.2492	148.5		1.2492	145
1.25	154.94		1.2508	152.74		1.25	148.47		1.25	145.01
1.2508	154.97		1.25159	152.72		1.2508	148.46		1.2508	145.04
1.2516	155		1.25239	152.71		1.25159	148.45		1.25159	145.08
1.2524	155.01		1.25319	152.68		1.25239	148.48		1.25239	145.11
1.2532	155		1.25398	152.66		1.25319	148.51		1.25319	145.12
1.254	154.98		1.25478	152.63		1.25398	148.57		1.25398	145.13
1.2548	154.94		1.25558	152.59		1.25478	148.63		1.25478	145.12
1.2556	154.9		1.25637	152.55		1.25558	148.67		1.25558	145.11
1.2564	154.86		1.25717	152.49		1.25637	148.72		1.25637	145.08
1.2572	154.84		1.25797	152.41		1.25717	148.75		1.25717	145.05
1.258	154.84		1.25876	152.33		1.25797	148.77		1.25797	145.01
1.2588	154.84		1.25956	152.29		1.25876	148.8		1.25876	144.97
1.2596	154.81		1.26036	152.27		1.25956	148.87		1.25956	144.94
1.2604	154.74		1.26115	152.25		1.26036	148.93		1.26036	144.89
1.2612	154.67		1.26195	152.23		1.26115	149.03		1.26115	144.84
1.262	154.64		1.26275	152.22		1.26195	149.12		1.26195	144.79
1.2627	154.63		1.26354	152.19		1.26275	149.25		1.26275	144.72
1.2635	154.61		1.26434	152.16		1.26354	149.39		1.26354	144.63
1.2643	154.59		1.26514	152.12		1.26434	149.5		1.26434	144.53
1.2651	154.55		1.26593	152.08		1.26514	149.6		1.26514	144.43
1.2659	154.49		1.26673	152.03		1.26593	149.7		1.26593	144.33
1.2667	154.4		1.26753	151.98		1.26673	149.8		1.26673	144.23
1.2675	154.3		1.26832	151.94		1.26753	149.9		1.26753	144.13
1.2683	154.19		1.26912	151.91		1.26832	149.98		1.26832	144.03
1.2691	154.08		1.26992	151.87		1.26912	150.04		1.26912	143.93
1.2699	153.98		1.27071	151.81		1.26992	150.09		1.26992	143.85
1.2707	153.9		1.27151	151.76		1.27071	150.12		1.27071	143.78
1.2715	153.85		1.27231	151.7		1.27151	150.16		1.27151	143.7
1.2723	153.81		1.2731	151.64		1.27231	150.19		1.27231	143.63
1.2731	153.77		1.2739	151.59		1.2731	150.24		1.2731	143.57
1.2739	153.7		1.2747	151.55		1.2739	150.31		1.2739	143.52
1.2747	153.64		1.27549	151.52		1.2747	150.4		1.2747	143.49
1.2755	153.58		1.27629	151.52		1.27549	150.5		1.27549	143.5
1.2763	153.54		1.27709	151.54		1.27629	150.62		1.27629	143.51
1.2771	153.5		1.27788	151.55		1.27709	150.75		1.27709	143.51
1.2779	153.47		1.27868	151.53		1.27788	150.89		1.27788	143.54
1.2787	153.43		1.27948	151.53		1.27868	151.03		1.27868	143.57
1.2795	153.39		1.28027	151.5		1.27948	151.16		1.27948	143.59
1.2803	153.36		1.28107	151.47		1.28027	151.28		1.28027	143.62
1.2811	153.34		1.28187	151.44		1.28107	151.38		1.28107	143.65
1.2819	153.34		1.28266	151.41		1.28187	151.47		1.28187	143.68
1.2827	153.35		1.28346	151.39		1.28266	151.56		1.28266	143.71
1.2835	153.34		1.28426	151.37		1.28346	151.67		1.28346	143.74
1.2843	153.28		1.28505	151.37		1.28426	151.82		1.28426	143.76
1.2851	153.17		1.28585	151.38		1.28505	151.99		1.28505	143.76
1.2859	153.02		1.28665	151.4		1.28585	152.17		1.28585	143.76
1.2866	152.87		1.28744	151.42		1.28665	152.35		1.28665	143.76
1.2874	152.72		1.28824	151.43		1.28744	152.49		1.28744	143.74
1.2882	152.56		1.28904	151.42		1.28824	152.63		1.28824	143.71
1.289	152.39		1.28983	151.42		1.28904	152.74		1.28904	143.66
1.2898	152.23		1.29063	151.43		1.28983	152.84		1.28983	143.6
1.2906	152.05		1.29143	151.46		1.29063	152.93		1.29063	143.54
1.2914	151.87		1.29222	151.51		1.29143	153.02		1.29143	143.49
1.2922	151.7		1.29302	151.6		1.29222	153.09		1.29222	143.42
1.293	151.55		1.29382	151.71		1.29302	153.16		1.29302	143.37
1.2938	151.42		1.29461	151.85		1.29382	153.22		1.29382	143.32
1.2946	151.32		1.29541	152.02		1.29461	153.29		1.29461	143.28
1.2954	151.24		1.29621	152.24		1.29541	153.36		1.29541	143.25
1.2962	151.18		1.297	152.46		1.29621	153.43		1.29621	143.22
1.297	151.13		1.2978	152.63		1.297	153.5		1.297	143.19
1.2978	151.06		1.2986	152.76		1.2978	153.56		1.2978	143.17
1.2986	150.98		1.29939	152.87		1.2986	153.63		1.2986	143.17
1.2994	150.91		1.30019	152.96		1.29939	153.71		1.29939	143.16
1.3002	150.84		1.30099	153.03		1.30019	153.82		1.30019	143.16
1.301	150.77		1.30178	153.1		1.30099	153.93		1.30099	143.17
1.3018	150.72		1.30258	153.16		1.30178	154.01		1.30178	143.19
1.3026	150.67		1.30338	153.22		1.30258	154.09		1.30258	143.24
1.3034	150.61		1.30417	153.27		1.30338	154.15		1.30338	143.29
1.3042	150.56		1.30497	153.31		1.30417	154.2		1.30417	143.35
1.305	150.52		1.30577	153.36		1.30497	154.25		1.30497	143.39
1.3058	150.49		1.30656	153.39		1.30577	154.29		1.30577	143.43
1.3066	150.47		1.30736	153.43		1.30656	154.29		1.30656	143.47
1.3074	150.46		1.30816	153.47		1.30736	154.28		1.30736	143.51
1.3082	150.42		1.30895	153.51		1.30816	154.27		1.30816	143.54
1.309	150.33		1.30975	153.55		1.30895	154.24		1.30895	143.55
1.3098	150.22		1.31055	153.59		1.30975	154.23		1.30975	143.55
1.3105	150.1		1.31134	153.63		1.31055	154.24		1.31055	143.55
1.3113	150		1.31214	153.66		1.31134	154.25		1.31134	143.57
1.3121	149.92		1.31294	153.7		1.31214	154.27		1.31214	143.61
1.3129	149.86		1.31373	153.73		1.31294	154.31		1.31294	143.67
1.3137	149.8		1.31453	153.78		1.31373	154.36		1.31373	143.73
1.3145	149.75		1.31533	153.83		1.31453	154.41		1.31453	143.81
1.3153	149.7		1.31612	153.89		1.31533	154.48		1.31533	143.88
1.3161	149.66		1.31692	153.93		1.31612	154.58		1.31612	143.94
1.3169	149.63		1.31772	153.97		1.31692	154.69		1.31692	144.01
1.3177	149.59		1.31851	154.01		1.31772	154.81		1.31772	144.06
1.3185	149.57		1.31931	154.07		1.31851	154.93		1.31851	144.09
1.3193	149.53		1.32011	154.1		1.31931	155.05		1.31931	144.09
1.3201	149.48		1.32091	154.14		1.32011	155.19		1.32011	144.09
1.3209	149.42		1.3217	154.19		1.32091	155.33		1.32091	144.08
1.3217	149.36		1.3225	154.25		1.3217	155.45		1.3217	144.1
1.3225	149.3		1.3233	154.31		1.3225	155.59		1.3225	144.15
1.3233	149.24		1.32409	154.38		1.3233	155.75		1.3233	144.21
1.3241	149.21		1.32489	154.45		1.32409	155.89		1.32409	144.28
1.3249	149.22		1.32569	154.51		1.32489	156.04		1.32489	144.34
1.3257	149.26		1.32648	154.6		1.32569	156.19		1.32569	144.41
1.3265	149.3		1.32728	154.65		1.32648	156.33		1.32648	144.46
1.3273	149.33		1.32808	154.71		1.32728	156.46		1.32728	144.52
1.3281	149.35		1.32887	154.78		1.32808	156.6		1.32808	144.59
1.3289	149.35		1.32967	154.84		1.32887	156.73		1.32887	144.67
1.3297	149.33		1.33047	154.9		1.32967	156.85		1.32967	144.75
1.3305	149.3		1.33126	154.95		1.33047	156.96		1.33047	144.82
1.3313	149.27		1.33206	154.97		1.33126	157.06		1.33126	144.87
1.3321	149.26		1.33286	155.01		1.33206	157.14		1.33206	144.91
1.3329	149.27		1.33365	155.02		1.33286	157.22		1.33286	144.95
1.3337	149.26		1.33445	155.02		1.33365	157.3		1.33365	144.99
1.3344	149.24		1.33525	155.02		1.33445	157.38		1.33445	145.03
1.3352	149.2		1.33604	155.03		1.33525	157.47		1.33525	145.06
1.336	149.16		1.33684	155.06		1.33604	157.56		1.33604	145.11
1.3368	149.13		1.33764	155.09		1.33684	157.68		1.33684	145.17
1.3376	149.1		1.33843	155.12		1.33764	157.84		1.33764	145.26
1.3384	149.06		1.33923	155.12		1.33843	158.01		1.33843	145.34
1.3392	149.02		1.34003	155.1		1.33923	158.15		1.33923	145.41
1.34	148.97		1.34082	155.08		1.34003	158.3		1.34003	145.49
1.3408	148.91		1.34162	155.09		1.34082	158.43		1.34082	145.58
1.3416	148.82		1.34242	155.07		1.34162	158.56		1.34162	145.66
1.3424	148.72		1.34321	155.06		1.34242	158.66		1.34242	145.75
1.3432	148.62		1.34401	155.06		1.34321	158.76		1.34321	145.86
1.344	148.53		1.34481	155.06		1.34401	158.89		1.34401	145.99
1.3448	148.47		1.3456	155.07		1.34481	158.99		1.34481	146.14
1.3456	148.44		1.3464	155.1		1.3456	159.07		1.3456	146.31
1.3464	148.46		1.3472	155.14		1.3464	159.12		1.3464	146.49
1.3472	148.51		1.34799	155.17		1.3472	159.16		1.3472	146.68
1.348	148.6		1.34879	155.18		1.34799	159.21		1.34799	146.85
1.3488	148.71		1.34959	155.18		1.34879	159.26		1.34879	147.02
1.3496	148.82		1.35038	155.19		1.34959	159.33		1.34959	147.16
1.3504	148.92		1.35118	155.17		1.35038	159.41		1.35038	147.27
1.3512	149.01		1.35198	155.15		1.35118	159.47		1.35118	147.37
1.352	149.11		1.35277	155.1		1.35198	159.55		1.35198	147.47
1.3528	149.21		1.35357	155.05		1.35277	159.6		1.35277	147.54
1.3536	149.32		1.35437	154.98		1.35357	159.62		1.35357	147.6
1.3544	149.42		1.35516	154.91		1.35437	159.63		1.35437	147.64
1.3552	149.49		1.35596	154.85		1.35516	159.63		1.35516	147.66
1.356	149.52		1.35676	154.77		1.35596	159.63		1.35596	147.68
1.3568	149.56		1.35755	154.71		1.35676	159.63		1.35676	147.71
1.3576	149.6		1.35835	154.67		1.35755	159.62		1.35755	147.73
1.3583	149.65		1.35915	154.64		1.35835	159.61		1.35835	147.75
1.3591	149.69		1.35994	154.65		1.35915	159.6		1.35915	147.77
1.3599	149.72		1.36074	154.67		1.35994	159.6		1.35994	147.78
1.3607	149.75		1.36154	154.71		1.36074	159.6		1.36074	147.8
1.3615	149.8		1.36233	154.75		1.36154	159.61		1.36154	147.83
1.3623	149.87		1.36313	154.79		1.36233	159.63		1.36233	147.86
1.3631	149.97		1.36393	154.85		1.36313	159.64		1.36313	147.88
1.3639	150.11		1.36472	154.9		1.36393	159.65		1.36393	147.89
1.3647	150.28		1.36552	154.92		1.36472	159.66		1.36472	147.91
1.3655	150.47		1.36632	154.92		1.36552	159.65		1.36552	147.94
1.3663	150.64		1.36711	154.91		1.36632	159.62		1.36632	147.99
1.3671	150.8		1.36791	154.9		1.36711	159.61		1.36711	148.05
1.3679	150.96		1.36871	154.91		1.36791	159.59		1.36791	148.11
1.3687	151.11		1.3695	154.93		1.36871	159.6		1.36871	148.16
1.3695	151.22		1.3703	154.94		1.3695	159.62		1.3695	148.2
1.3703	151.3		1.3711	154.97		1.3703	159.65		1.3703	148.23
1.3711	151.35		1.37189	155.02		1.3711	159.67		1.3711	148.25
1.3719	151.38		1.37269	155.04		1.37189	159.7		1.37189	148.26
1.3727	151.36		1.37349	155.06		1.37269	159.72		1.37269	148.25
1.3735	151.32		1.37428	155.09		1.37349	159.73		1.37349	148.24
1.3743	151.27		1.37508	155.13		1.37428	159.75		1.37428	148.23
1.3751	151.22		1.37588	155.17		1.37508	159.78		1.37508	148.22
1.3759	151.18		1.37667	155.2		1.37588	159.81		1.37588	148.22
1.3767	151.16		1.37747	155.22		1.37667	159.84		1.37667	148.22
1.3775	151.15		1.37827	155.25		1.37747	159.88		1.37747	148.21
1.3783	151.14		1.37906	155.29		1.37827	159.91		1.37827	148.18
1.3791	151.13		1.37986	155.32		1.37906	159.92		1.37906	148.16
1.3799	151.12		1.38066	155.34		1.37986	159.92		1.37986	148.14
1.3807	151.11		1.38145	155.33		1.38066	159.91		1.38066	148.12
1.3815	151.09		1.38225	155.31		1.38145	159.9		1.38145	148.09
1.3822	151.08		1.38305	155.27		1.38225	159.89		1.38225	148.01
1.383	151.07		1.38384	155.24		1.38305	159.89		1.38305	147.9
1.3838	151.08		1.38464	155.22		1.38384	159.91		1.38384	147.77
1.3846	151.07		1.38544	155.2		1.38464	159.94		1.38464	147.64
1.3854	151.04		1.38623	155.19		1.38544	160		1.38544	147.53
1.3862	151		1.38703	155.17		1.38623	160.09		1.38623	147.43
1.387	150.96		1.38783	155.14		1.38703	160.19		1.38703	147.34
1.3878	150.93		1.38862	155.11		1.38783	160.32		1.38783	147.26
1.3886	150.92		1.38942	155.08		1.38862	160.45		1.38862	147.22
1.3894	150.91		1.39022	155.06		1.38942	160.56		1.38942	147.18
1.3902	150.89		1.39101	155.04		1.39022	160.67		1.39022	147.14
1.391	150.85		1.39181	155		1.39101	160.78		1.39101	147.09
1.3918	150.82		1.39261	154.97		1.39181	160.88		1.39181	147
1.3926	150.78		1.3934	154.95		1.39261	160.96		1.39261	146.9
1.3934	150.74		1.3942	154.95		1.3934	161.04		1.3934	146.81
1.3942	150.68		1.395	154.99		1.3942	161.12		1.3942	146.73
1.395	150.61		1.39579	155.01		1.395	161.17		1.395	146.67
1.3958	150.53		1.39659	155.08		1.39579	161.17		1.39579	146.62
1.3966	150.45		1.39739	155.12		1.39659	161.14		1.39659	146.56
1.3974	150.39		1.39818	155.17		1.39739	161.12		1.39739	146.51
1.3982	150.34		1.39898	155.19		1.39818	161.09		1.39818	146.48
1.399	150.32		1.39978	155.23		1.39898	161.07		1.39898	146.45
1.3998	150.3		1.40057	155.24		1.39978	161.07		1.39978	146.41
1.4006	150.28		1.40137	155.26		1.40057	161.05		1.40057	146.38
1.4014	150.28		1.40217	155.29		1.40137	161.02		1.40137	146.35
1.4022	150.29		1.40296	155.32		1.40217	160.98		1.40217	146.32
1.403	150.31		1.40376	155.34		1.40296	160.92		1.40296	146.28
1.4038	150.3		1.40456	155.34		1.40376	160.9		1.40376	146.25
1.4046	150.26		1.40535	155.34		1.40456	160.88		1.40456	146.25
1.4054	150.17		1.40615	155.32		1.40535	160.89		1.40535	146.23
1.4062	150.07		1.40695	155.31		1.40615	160.91		1.40615	146.21
1.4069	149.97		1.40774	155.29		1.40695	160.95		1.40695	146.19
1.4077	149.88		1.40854	155.27		1.40774	160.99		1.40774	146.16
1.4085	149.8		1.40934	155.25		1.40854	161.03		1.40854	146.12
1.4093	149.72		1.41013	155.2		1.40934	161.06		1.40934	146.07
1.4101	149.65		1.41093	155.15		1.41013	161.07		1.41013	146.01
1.4109	149.58		1.41173	155.12		1.41093	161.08		1.41093	145.95
1.4117	149.5		1.41252	155.09		1.41173	161.08		1.41173	145.89
1.4125	149.4		1.41332	155.07		1.41252	161.05		1.41252	145.83
1.4133	149.29		1.41412	155.07		1.41332	161.02		1.41332	145.77
1.4141	149.15		1.41491	155.1		1.41412	161		1.41412	145.73
1.4149	149		1.41571	155.13		1.41491	160.96		1.41491	145.69
1.4157	148.83		1.41651	155.16		1.41571	160.94		1.41571	145.62
1.4165	148.63		1.4173	155.19		1.41651	160.91		1.41651	145.54
1.4173	148.42		1.4181	155.22		1.4173	160.87		1.4173	145.44
1.4181	148.23		1.4189	155.26		1.4181	160.84		1.4181	145.37
1.4189	148.06		1.41969	155.32		1.4189	160.82		1.4189	145.33
1.4197	147.92		1.42049	155.37		1.41969	160.8		1.41969	145.31
1.4205	147.81		1.42129	155.41		1.42049	160.79		1.42049	145.3
1.4213	147.75		1.42208	155.47		1.42129	160.77		1.42129	145.3
1.4221	147.74		1.42288	155.53		1.42208	160.74		1.42208	145.3
1.4229	147.78		1.42368	155.59		1.42288	160.72		1.42288	145.31
1.4237	147.85		1.42447	155.65		1.42368	160.72		1.42368	145.32
1.4245	147.93		1.42527	155.68		1.42447	160.74		1.42447	145.36
1.4253	147.99		1.42607	155.72		1.42527	160.78		1.42527	145.41
1.4261	148		1.42686	155.76		1.42607	160.84		1.42607	145.44
1.4269	147.99		1.42766	155.82		1.42686	160.89		1.42686	145.45
1.4277	147.95		1.42846	155.88		1.42766	160.9		1.42766	145.45
1.4285	147.89		1.42925	155.95		1.42846	160.89		1.42846	145.44
1.4293	147.84		1.43005	156.03		1.42925	160.83		1.42925	145.42
1.4301	147.78		1.43085	156.13		1.43005	160.76		1.43005	145.41
1.4308	147.71		1.43164	156.22		1.43085	160.71		1.43085	145.4
1.4316	147.62		1.43244	156.33		1.43164	160.68		1.43164	145.38
1.4324	147.51		1.43324	156.45		1.43244	160.71		1.43244	145.37
1.4332	147.38		1.43403	156.55		1.43324	160.76		1.43324	145.33
1.434	147.24		1.43483	156.65		1.43403	160.81		1.43403	145.27
1.4348	147.09		1.43563	156.72		1.43483	160.88		1.43483	145.2
1.4356	146.94		1.43642	156.79		1.43563	160.95		1.43563	145.13
1.4364	146.77		1.43722	156.84		1.43642	161.03		1.43642	145.08
1.4372	146.6		1.43802	156.89		1.43722	161.11		1.43722	145.04
1.438	146.42		1.43881	156.94		1.43802	161.17		1.43802	145.02
1.4388	146.25		1.43961	156.98		1.43881	161.23		1.43881	145.01
1.4396	146.09		1.44041	157.03		1.43961	161.27		1.43961	145.01
1.4404	145.94		1.4412	157.07		1.44041	161.32		1.44041	145.01
1.4412	145.78		1.442	157.11		1.4412	161.37		1.4412	145.02
1.442	145.6		1.4428	157.14		1.442	161.41		1.442	145.03
1.4428	145.43		1.44359	157.16		1.4428	161.46		1.4428	145.03
1.4436	145.27		1.44439	157.18		1.44359	161.47		1.44359	145.01
1.4444	145.13		1.44519	157.22		1.44439	161.48		1.44439	144.98
1.4452	145.02		1.44598	157.29		1.44519	161.52		1.44519	144.94
1.446	144.94		1.44678	157.37		1.44598	161.58		1.44598	144.89
1.4468	144.86		1.44758	157.48		1.44678	161.65		1.44678	144.84
1.4476	144.78		1.44837	157.58		1.44758	161.72		1.44758	144.8
1.4484	144.72		1.44917	157.68		1.44837	161.79		1.44837	144.78
1.4492	144.67		1.44997	157.78		1.44917	161.87		1.44917	144.79
1.45	144.63		1.45076	157.87		1.44997	161.93		1.44997	144.8
1.4508	144.58		1.45156	157.93		1.45076	161.99		1.45076	144.81
1.4516	144.52		1.45236	157.99		1.45156	162.06		1.45156	144.83
1.4524	144.48		1.45315	158.02		1.45236	162.13		1.45236	144.86
1.4532	144.44		1.45395	158.04		1.45315	162.22		1.45315	144.89
1.454	144.4		1.45475	158.04		1.45395	162.31		1.45395	144.91
1.4547	144.39		1.45554	158.05		1.45475	162.39		1.45475	144.91
1.4555	144.37		1.45634	158.06		1.45554	162.47		1.45554	144.9
1.4563	144.33		1.45714	158.1		1.45634	162.55		1.45634	144.89
1.4571	144.28		1.45793	158.13		1.45714	162.61		1.45714	144.9
1.4579	144.24		1.45873	158.16		1.45793	162.68		1.45793	144.94
1.4587	144.2		1.45953	158.2		1.45873	162.76		1.45873	144.98
1.4595	144.18		1.46033	158.23		1.45953	162.84		1.45953	145.01
1.4603	144.18		1.46112	158.26		1.46033	162.92		1.46033	145.02
1.4611	144.2		1.46192	158.28		1.46112	163.01		1.46112	145.03
1.4619	144.22		1.46272	158.3		1.46192	163.1		1.46192	145.04
1.4627	144.24		1.46351	158.31		1.46272	163.19		1.46272	145.08
1.4635	144.23		1.46431	158.29		1.46351	163.29		1.46351	145.13
1.4643	144.21		1.46511	158.25		1.46431	163.38		1.46431	145.18
1.4651	144.2		1.4659	158.21		1.46511	163.45		1.46511	145.21
1.4659	144.2		1.4667	158.19		1.4659	163.5		1.4659	145.24
1.4667	144.2		1.4675	158.15		1.4667	163.54		1.4667	145.28
1.4675	144.21		1.46829	158.1		1.4675	163.54		1.4675	145.33
1.4683	144.22		1.46909	158.07		1.46829	163.53		1.46829	145.37
1.4691	144.25		1.46989	158.04		1.46909	163.49		1.46909	145.41
1.4699	144.3		1.47068	158.02		1.46989	163.44		1.46989	145.44
1.4707	144.35		1.47148	158.02		1.47068	163.38		1.47068	145.46
1.4715	144.38		1.47228	157.99		1.47148	163.32		1.47148	145.5
1.4723	144.4		1.47307	157.94		1.47228	163.27		1.47228	145.53
1.4731	144.41		1.47387	157.86		1.47307	163.23		1.47307	145.55
1.4739	144.44		1.47467	157.74		1.47387	163.22		1.47387	145.56
1.4747	144.49		1.47546	157.64		1.47467	163.23		1.47467	145.57
1.4755	144.55		1.47626	157.52		1.47546	163.26		1.47546	145.6
1.4763	144.61		1.47706	157.41		1.47626	163.32		1.47626	145.65
1.4771	144.66		1.47785	157.29		1.47706	163.35		1.47706	145.7
1.4779	144.7		1.47865	157.19		1.47785	163.39		1.47785	145.75
1.4786	144.73		1.47945	157.1		1.47865	163.41		1.47865	145.82
1.4794	144.76		1.48024	157.03		1.47945	163.41		1.47945	145.9
1.4802	144.79		1.48104	156.94		1.48024	163.42		1.48024	145.97
1.481	144.79		1.48184	156.84		1.48104	163.45		1.48104	146
1.4818	144.8		1.48263	156.74		1.48184	163.49		1.48184	146
1.4826	144.81		1.48343	156.66		1.48263	163.55		1.48263	145.98
1.4834	144.83		1.48423	156.62		1.48343	163.59		1.48343	145.93
1.4842	144.86		1.48502	156.58		1.48423	163.6		1.48423	145.88
1.485	144.92		1.48582	156.52		1.48502	163.57		1.48502	145.85
1.4858	144.98		1.48662	156.47		1.48582	163.53		1.48582	145.84
1.4866	145.01		1.48741	156.42		1.48662	163.48		1.48662	145.84
1.4874	145.04		1.48821	156.36		1.48741	163.42		1.48741	145.85
1.4882	145.09		1.48901	156.27		1.48821	163.39		1.48821	145.87
1.489	145.16		1.4898	156.21		1.48901	163.37		1.48901	145.89
1.4898	145.24		1.4906	156.13		1.4898	163.39		1.4898	145.9
1.4906	145.33		1.4914	156.03		1.4906	163.39		1.4906	145.9
1.4914	145.43		1.49219	155.94		1.4914	163.4		1.4914	145.91
1.4922	145.55		1.49299	155.87		1.49219	163.42		1.49219	145.91
1.493	145.7		1.49379	155.79		1.49299	163.44		1.49299	145.9
1.4938	145.89		1.49458	155.68		1.49379	163.45		1.49379	145.89
1.4946	146.1		1.49538	155.56		1.49458	163.47		1.49458	145.89
1.4954	146.31		1.49618	155.44		1.49538	163.47		1.49538	145.91
1.4962	146.52		1.49697	155.32		1.49618	163.46		1.49618	145.93
1.497	146.72		1.49777	155.2		1.49697	163.45		1.49697	145.94
1.4978	146.9		1.49857	155.09		1.49777	163.42		1.49777	145.93
1.4986	147.08		1.49936	154.97		1.49857	163.39		1.49857	145.9
1.4994	147.24		1.50016	154.85		1.49936	163.36		1.49936	145.86
1.5002	147.39		1.50096	154.74		1.50016	163.34		1.50016	145.8
1.501	147.52		1.50175	154.65		1.50096	163.32		1.50096	145.73
1.5018	147.62		1.50255	154.57		1.50175	163.31		1.50175	145.67
1.5025	147.69		1.50335	154.51		1.50255	163.29		1.50255	145.61
1.5033	147.72		1.50414	154.46		1.50335	163.24		1.50335	145.54
1.5041	147.72		1.50494	154.42		1.50414	163.18		1.50414	145.45
1.5049	147.72		1.50574	154.36		1.50494	163.11		1.50494	145.36
1.5057	147.75		1.50653	154.28		1.50574	163.06		1.50574	145.29
1.5065	147.8		1.50733	154.19		1.50653	163.02		1.50653	145.23
1.5073	147.85		1.50813	154.1		1.50733	163.02		1.50733	145.19
1.5081	147.9		1.50892	154.01		1.50813	163.04		1.50813	145.15
1.5089	147.93		1.50972	153.91		1.50892	163.1		1.50892	145.14
1.5097	147.95		1.51052	153.79		1.50972	163.17		1.50972	145.14
1.5105	147.98		1.51131	153.69		1.51052	163.25		1.51052	145.16
1.5113	148.04		1.51211	153.59		1.51131	163.31		1.51131	145.19
1.5121	148.13		1.51291	153.48		1.51211	163.34		1.51211	145.22
1.5129	148.21		1.5137	153.39		1.51291	163.35		1.51291	145.26
1.5137	148.26		1.5145	153.29		1.5137	163.36		1.5137	145.29
1.5145	148.31		1.5153	153.21		1.5145	163.34		1.5145	145.29
1.5153	148.39		1.51609	153.16		1.5153	163.33		1.5153	145.28
1.5161	148.51		1.51689	153.12		1.51609	163.29		1.51609	145.27
1.5169	148.66		1.51769	153.08		1.51689	163.24		1.51689	145.26
1.5177	148.84		1.51848	153.01		1.51769	163.21		1.51769	145.25
1.5185	149.03		1.51928	152.94		1.51848	163.19		1.51848	145.25
1.5193	149.21		1.52008	152.86		1.51928	163.21		1.51928	145.27
1.5201	149.39		1.52087	152.78		1.52008	163.22		1.52008	145.29
1.5209	149.56		1.52167	152.69		1.52087	163.26		1.52087	145.3
1.5217	149.73		1.52247	152.64		1.52167	163.29		1.52167	145.31
1.5225	149.88		1.52326	152.6		1.52247	163.31		1.52247	145.33
1.5233	150		1.52406	152.59		1.52326	163.33		1.52326	145.36
1.5241	150.11		1.52486	152.61		1.52406	163.35		1.52406	145.37
1.5249	150.23		1.52565	152.63		1.52486	163.37		1.52486	145.35
1.5257	150.35		1.52645	152.63		1.52565	163.39		1.52565	145.32
1.5264	150.49		1.52725	152.61		1.52645	163.39		1.52645	145.3
1.5272	150.62		1.52804	152.59		1.52725	163.39		1.52725	145.28
1.528	150.74		1.52884	152.58		1.52804	163.38		1.52804	145.28
1.5288	150.85		1.52964	152.58		1.52884	163.33		1.52884	145.28
1.5296	150.97		1.53043	152.59		1.52964	163.29		1.52964	145.29
1.5304	151.1		1.53123	152.6		1.53043	163.25		1.53043	145.29
1.5312	151.22		1.53203	152.61		1.53123	163.2		1.53123	145.28
1.532	151.33		1.53282	152.64		1.53203	163.16		1.53203	145.27
1.5328	151.44		1.53362	152.68		1.53282	163.12		1.53282	145.26
1.5336	151.55		1.53442	152.74		1.53362	163.08		1.53362	145.25
1.5344	151.64		1.53521	152.79		1.53442	163.05		1.53442	145.23
1.5352	151.73		1.53601	152.83		1.53521	163.02		1.53521	145.21
1.536	151.83		1.53681	152.83		1.53601	162.99		1.53601	145.18
1.5368	151.94		1.5376	152.8		1.53681	162.98		1.53681	145.13
1.5376	152.05		1.5384	152.75		1.5376	162.96		1.5376	145.07
1.5384	152.15		1.5392	152.67		1.5384	162.96		1.5384	145.01
1.5392	152.24		1.53999	152.61		1.5392	162.94		1.5392	144.94
1.54	152.31		1.54079	152.56		1.53999	162.92		1.53999	144.9
1.5408	152.36		1.54159	152.52		1.54079	162.89		1.54079	144.87
1.5416	152.41		1.54238	152.48		1.54159	162.85		1.54159	144.87
1.5424	152.47		1.54318	152.43		1.54238	162.81		1.54238	144.86
1.5432	152.55		1.54398	152.38		1.54318	162.76		1.54318	144.84
1.544	152.64		1.54477	152.35		1.54398	162.71		1.54398	144.81
1.5448	152.72		1.54557	152.31		1.54477	162.66		1.54477	144.79
1.5456	152.79		1.54637	152.28		1.54557	162.62		1.54557	144.76
1.5464	152.85		1.54716	152.28		1.54637	162.58		1.54637	144.72
1.5472	152.9		1.54796	152.32		1.54716	162.56		1.54716	144.69
1.548	152.96		1.54876	152.35		1.54796	162.57		1.54796	144.65
1.5488	153.02		1.54955	152.39		1.54876	162.61		1.54876	144.62
1.5496	153.09		1.55035	152.42		1.54955	162.66		1.54955	144.6
1.5504	153.18		1.55115	152.45		1.55035	162.73		1.55035	144.58
1.5511	153.29		1.55194	152.5		1.55115	162.82		1.55115	144.57
1.5519	153.41		1.55274	152.56		1.55194	162.9		1.55194	144.56
1.5527	153.55		1.55354	152.62		1.55274	162.96		1.55274	144.55
1.5535	153.68		1.55433	152.68		1.55354	162.97		1.55354	144.52
1.5543	153.78		1.55513	152.74		1.55433	162.95		1.55433	144.48
1.5551	153.85		1.55593	152.8		1.55513	162.91		1.55513	144.44
1.5559	153.9		1.55672	152.88		1.55593	162.86		1.55593	144.41
1.5567	153.92		1.55752	152.96		1.55672	162.81		1.55672	144.4
1.5575	153.91		1.55832	153.05		1.55752	162.75		1.55752	144.38
1.5583	153.9		1.55911	153.13		1.55832	162.71		1.55832	144.34
1.5591	153.89		1.55991	153.21		1.55911	162.67		1.55911	144.29
1.5599	153.88		1.56071	153.28		1.55991	162.64		1.55991	144.23
1.5607	153.88		1.5615	153.33		1.56071	162.62		1.56071	144.19
1.5615	153.86		1.5623	153.38		1.5615	162.6		1.5615	144.17
1.5623	153.83		1.5631	153.41		1.5623	162.57		1.5623	144.17
1.5631	153.8		1.56389	153.43		1.5631	162.54		1.5631	144.19
1.5639	153.78		1.56469	153.45		1.56389	162.5		1.56389	144.2
1.5647	153.78		1.56549	153.5		1.56469	162.47		1.56469	144.2
1.5655	153.81		1.56628	153.55		1.56549	162.45		1.56549	144.21
1.5663	153.89		1.56708	153.62		1.56628	162.43		1.56628	144.22
1.5671	153.96		1.56788	153.69		1.56708	162.41		1.56708	144.22
1.5679	154.01		1.56867	153.79		1.56788	162.37		1.56788	144.2
1.5687	154.03		1.56947	153.89		1.56867	162.33		1.56867	144.17
1.5695	154.04		1.57027	154.01		1.56947	162.27		1.56947	144.13
1.5703	154.03		1.57106	154.13		1.57027	162.22		1.57027	144.08
1.5711	154.02		1.57186	154.24		1.57106	162.16		1.57106	144.03
1.5719	153.98		1.57266	154.34		1.57186	162.11		1.57186	144.01
1.5727	153.92		1.57345	154.43		1.57266	162.04		1.57266	144.02
1.5735	153.86		1.57425	154.53		1.57345	161.97		1.57345	144.02
1.5743	153.79		1.57505	154.63		1.57425	161.91		1.57425	144.03
1.575	153.73		1.57584	154.74		1.57505	161.87		1.57505	144.04
1.5758	153.67		1.57664	154.86		1.57584	161.85		1.57584	144.05
1.5766	153.62		1.57744	154.97		1.57664	161.82		1.57664	144.07
1.5774	153.58		1.57823	155.06		1.57744	161.79		1.57744	144.08
1.5782	153.54		1.57903	155.17		1.57823	161.75		1.57823	144.08
1.579	153.51		1.57983	155.27		1.57903	161.71		1.57903	144.07
1.5798	153.48		1.58062	155.38		1.57983	161.65		1.57983	144.08
1.5806	153.44		1.58142	155.46		1.58062	161.59		1.58062	144.11
1.5814	153.39		1.58222	155.53		1.58142	161.53		1.58142	144.14
1.5822	153.32		1.58301	155.57		1.58222	161.47		1.58222	144.16
1.583	153.26		1.58381	155.59		1.58301	161.42		1.58301	144.17
1.5838	153.21		1.58461	155.59		1.58381	161.4		1.58381	144.17
1.5846	153.17		1.5854	155.61		1.58461	161.39		1.58461	144.15
1.5854	153.12		1.5862	155.63		1.5854	161.35		1.5854	144.11
1.5862	153.04		1.587	155.65		1.5862	161.32		1.5862	144.07
1.587	152.95		1.58779	155.67		1.587	161.29		1.587	144.04
1.5878	152.86		1.58859	155.71		1.58779	161.27		1.58779	144.03
1.5886	152.78		1.58939	155.75		1.58859	161.27		1.58859	144.02
1.5894	152.73		1.59018	155.83		1.58939	161.29		1.58939	144.03
1.5902	152.7		1.59098	155.92		1.59018	161.29		1.59018	144.04
[truncated: 27,066 more rows]

## Sheet: E
Note: Hairs were scanned from root (0 cm) to tip, but are graphed from tip (as 0 cm) to root. Therefore, all hairs are reversed when graphed.
Double Transition and Reverted Hairs
Distance (cm)	Intensity (A.U.)		Distance (cm)	Intensity (A.U.)		Distance (cm)	Intensity (A.U.)		Distance (cm)	Intensity (A.U.)
0	38.63		0	16.36		0	12.86		0	6.26
0.0008	38.61		0.0008	16.34		0.0008	12.87		0.0008	6.27
0.0016	38.59		0.0016	16.32		0.0016	12.87		0.00159	6.28
0.0024	38.59		0.0024	16.31		0.0024	12.87		0.00239	6.3
0.0032	38.58		0.0032	16.3		0.0032	12.87		0.00319	6.32
0.004	38.57		0.004	16.29		0.004	12.87		0.00398	6.33
0.0048	38.57		0.0048	16.28		0.0048	12.87		0.00478	6.33
0.0056	38.56		0.0056	16.27		0.0056	12.87		0.00558	6.33
0.0064	38.56		0.0064	16.26		0.0064	12.87		0.00637	6.32
0.0072	38.62		0.0072	16.25		0.0072	12.86		0.00717	6.31
0.008	38.72		0.008	16.24		0.008	12.85		0.00797	6.3
0.0088	38.82		0.0088	16.24		0.0088	12.84		0.00876	6.3
0.0096	38.86		0.0096	16.24		0.0096	12.82		0.00956	6.3
0.0104	38.85		0.0104	16.25		0.0104	12.81		0.01036	6.29
0.0112	38.84		0.0112	16.24		0.0112	12.79		0.01115	6.27
0.012	38.85		0.012	16.24		0.012	12.77		0.01195	6.25
0.0128	38.89		0.0127	16.25		0.0127	12.76		0.01275	6.24
0.0136	38.87		0.0135	16.24		0.0135	12.76		0.01354	6.23
0.0144	38.84		0.0143	16.23		0.0143	12.74		0.01434	6.24
0.0152	38.8		0.0151	16.22		0.0151	12.72		0.01514	6.25
0.016	38.74		0.0159	16.21		0.0159	12.7		0.01593	6.26
0.0168	38.72		0.0167	16.2		0.0167	12.69		0.01673	6.26
0.0176	38.76		0.0175	16.18		0.0175	12.68		0.01753	6.26
0.0184	38.76		0.0183	16.16		0.0183	12.67		0.01832	6.25
0.0192	38.63		0.0191	16.15		0.0191	12.66		0.01912	6.24
0.02	38.4		0.0199	16.13		0.0199	12.65		0.01992	6.23
0.0208	38.2		0.0207	16.12		0.0207	12.64		0.02071	6.22
0.0216	38.05		0.0215	16.1		0.0215	12.64		0.02151	6.21
0.0224	37.95		0.0223	16.09		0.0223	12.62		0.02231	6.18
0.0232	37.88		0.0231	16.07		0.0231	12.6		0.0231	6.12
0.024	37.81		0.0239	16.06		0.0239	12.58		0.0239	6.04
0.0248	37.78		0.0247	16.05		0.0247	12.56		0.0247	5.93
0.0256	37.76		0.0255	16.05		0.0255	12.55		0.02549	5.82
0.0264	37.74		0.0263	16.05		0.0263	12.54		0.02629	5.75
0.0272	37.72		0.0271	16.05		0.0271	12.54		0.02709	5.71
0.028	37.72		0.0279	16.05		0.0279	12.53		0.02788	5.69
0.0288	37.73		0.0287	16.04		0.0287	12.52		0.02868	5.68
0.0296	37.75		0.0295	16.03		0.0295	12.51		0.02948	5.68
0.0304	37.76		0.0303	16.03		0.0303	12.5		0.03027	5.68
0.0312	37.78		0.0311	16.03		0.0311	12.48		0.03107	5.68
0.0319	37.77		0.0319	16.03		0.0319	12.47		0.03187	5.68
0.0327	37.76		0.0327	16.03		0.0327	12.46		0.03266	5.69
0.0335	37.72		0.0335	16.02		0.0335	12.45		0.03346	5.71
0.0343	37.6		0.0343	16.01		0.0343	12.44		0.03426	5.73
0.0351	37.48		0.0351	15.99		0.0351	12.43		0.03505	5.75
0.0359	37.36		0.0359	15.97		0.0359	12.42		0.03585	5.77
0.0367	37.2		0.0366	15.97		0.0366	12.41		0.03665	5.78
0.0375	37.04		0.0374	15.97		0.0374	12.4		0.03744	5.79
0.0383	36.96		0.0382	15.97		0.0382	12.38		0.03824	5.81
0.0391	36.89		0.039	15.97		0.039	12.36		0.03904	5.83
0.0399	36.78		0.0398	15.97		0.0398	12.35		0.03983	5.85
0.0407	36.67		0.0406	15.97		0.0406	12.34		0.04063	5.86
0.0415	36.57		0.0414	15.97		0.0414	12.33		0.04143	5.87
0.0423	36.46		0.0422	15.98		0.0422	12.3		0.04222	5.87
0.0431	36.35		0.043	15.99		0.043	12.28		0.04302	5.87
0.0439	36.23		0.0438	16		0.0438	12.27		0.04382	5.87
0.0447	36.14		0.0446	16.01		0.0446	12.26		0.04461	5.88
0.0455	36.1		0.0454	16.02		0.0454	12.25		0.04541	5.88
0.0463	36.11		0.0462	16.03		0.0462	12.24		0.04621	5.88
0.0471	36.1		0.047	16.05		0.047	12.23		0.047	5.88
0.0479	36.09		0.0478	16.07		0.0478	12.22		0.0478	5.88
0.0487	36.08		0.0486	16.09		0.0486	12.21		0.0486	5.89
0.0495	36.08		0.0494	16.1		0.0494	12.19		0.04939	5.9
0.0503	36.1		0.0502	16.11		0.0502	12.17		0.05019	5.92
0.0511	36.12		0.051	16.12		0.051	12.14		0.05099	5.94
0.0519	36.14		0.0518	16.13		0.0518	12.11		0.05178	5.96
0.0527	36.16		0.0526	16.14		0.0526	12.09		0.05258	5.98
0.0535	36.18		0.0534	16.15		0.0534	12.07		0.05338	5.98
0.0543	36.17		0.0542	16.16		0.0542	12.05		0.05417	5.98
0.0551	36.17		0.055	16.17		0.055	12.03		0.05497	5.98
0.0559	36.17		0.0558	16.17		0.0558	12.01		0.05577	5.98
0.0567	36.18		0.0566	16.17		0.0566	11.99		0.05656	5.98
0.0575	36.19		0.0574	16.17		0.0574	11.96		0.05736	5.98
0.0583	36.16		0.0582	16.18		0.0582	11.94		0.05816	5.99
0.0591	36.1		0.059	16.19		0.059	11.91		0.05895	6
0.0599	36.03		0.0598	16.2		0.0598	11.89		0.05975	6
0.0607	36		0.0605	16.21		0.0605	11.88		0.06055	6
0.0615	36.02		0.0613	16.21		0.0613	11.87		0.06134	6
0.0623	36.05		0.0621	16.21		0.0621	11.86		0.06214	6
0.0631	36.1		0.0629	16.2		0.0629	11.85		0.06294	6
0.0639	36.14		0.0637	16.19		0.0637	11.84		0.06373	6
0.0647	36.19		0.0645	16.16		0.0645	11.83		0.06453	6
0.0655	36.21		0.0653	16.15		0.0653	11.82		0.06533	6
0.0663	36.23		0.0661	16.14		0.0661	11.8		0.06612	6
0.0671	36.25		0.0669	16.14		0.0669	11.79		0.06692	6
0.0679	36.26		0.0677	16.14		0.0677	11.77		0.06772	6
0.0687	36.27		0.0685	16.14		0.0685	11.75		0.06851	6
0.0695	36.3		0.0693	16.13		0.0693	11.73		0.06931	5.99
0.0703	36.31		0.0701	16.12		0.0701	11.71		0.07011	5.99
0.0711	36.33		0.0709	16.11		0.0709	11.69		0.07091	5.98
0.0719	36.35		0.0717	16.11		0.0717	11.67		0.0717	5.97
0.0727	36.38		0.0725	16.12		0.0725	11.65		0.0725	5.96
0.0735	36.41		0.0733	16.13		0.0733	11.64		0.0733	5.96
0.0743	36.43		0.0741	16.13		0.0741	11.62		0.07409	5.96
0.0751	36.45		0.0749	16.14		0.0749	11.59		0.07489	5.96
0.0759	36.48		0.0757	16.15		0.0757	11.56		0.07569	5.96
0.0767	36.51		0.0765	16.16		0.0765	11.52		0.07648	5.96
0.0775	36.52		0.0773	16.17		0.0773	11.47		0.07728	5.96
0.0783	36.53		0.0781	16.18		0.0781	11.43		0.07808	5.97
0.0791	36.53		0.0789	16.19		0.0789	11.38		0.07887	5.98
0.0799	36.53		0.0797	16.2		0.0797	11.33		0.07967	5.98
0.0807	36.54		0.0805	16.22		0.0805	11.29		0.08047	5.97
0.0815	36.54		0.0813	16.24		0.0813	11.26		0.08126	5.96
0.0823	36.55		0.0821	16.26		0.0821	11.23		0.08206	5.94
0.0831	36.58		0.0829	16.28		0.0829	11.2		0.08286	5.92
0.0839	36.61		0.0837	16.3		0.0837	11.17		0.08365	5.91
0.0847	36.63		0.0844	16.32		0.0844	11.15		0.08445	5.91
0.0855	36.67		0.0852	16.34		0.0852	11.13		0.08525	5.91
0.0863	36.69		0.086	16.36		0.086	11.1		0.08604	5.92
0.0871	36.67		0.0868	16.38		0.0868	11.08		0.08684	5.93
0.0879	36.61		0.0876	16.4		0.0876	11.07		0.08764	5.94
0.0887	36.55		0.0884	16.43		0.0884	11.06		0.08843	5.94
0.0895	36.54		0.0892	16.46		0.0892	11.05		0.08923	5.94
0.0903	36.56		0.09	16.49		0.09	11.03		0.09003	5.95
0.0911	36.57		0.0908	16.52		0.0908	11.02		0.09082	5.96
0.0919	36.61		0.0916	16.55		0.0916	10.98		0.09162	5.97
0.0927	36.71		0.0924	16.57		0.0924	10.93		0.09242	5.97
0.0935	36.89		0.0932	16.61		0.0932	10.88		0.09321	5.98
0.0942	36.99		0.094	16.65		0.094	10.86		0.09401	5.98
0.095	37		0.0948	16.69		0.0948	10.85		0.09481	5.98
0.0958	37.01		0.0956	16.73		0.0956	10.84		0.0956	5.98
0.0966	36.99		0.0964	16.76		0.0964	10.83		0.0964	5.99
0.0974	36.88		0.0972	16.79		0.0972	10.82		0.0972	6
0.0982	36.8		0.098	16.82		0.098	10.82		0.09799	6.01
0.099	36.78		0.0988	16.85		0.0988	10.82		0.09879	6.02
0.0998	36.8		0.0996	16.88		0.0996	10.82		0.09959	6.03
0.1006	36.9		0.1004	16.92		0.1004	10.82		0.10038	6.04
0.1014	36.95		0.1012	16.95		0.1012	10.81		0.10118	6.04
0.1022	36.97		0.102	16.98		0.102	10.81		0.10198	6.06
0.103	37.01		0.1028	17		0.1028	10.81		0.10277	6.08
0.1038	37.05		0.1036	17.02		0.1036	10.81		0.10357	6.09
0.1046	37.08		0.1044	17.04		0.1044	10.81		0.10437	6.11
0.1054	37.11		0.1052	17.05		0.1052	10.79		0.10516	6.13
0.1062	37.14		0.106	17.06		0.106	10.77		0.10596	6.15
0.107	37.17		0.1068	17.07		0.1068	10.75		0.10676	6.16
0.1078	37.18		0.1076	17.08		0.1076	10.74		0.10755	6.17
0.1086	37.18		0.1083	17.1		0.1083	10.73		0.10835	6.18
0.1094	37.16		0.1091	17.13		0.1091	10.72		0.10915	6.18
0.1102	37.17		0.1099	17.15		0.1099	10.71		0.10994	6.18
0.111	37.16		0.1107	17.18		0.1107	10.71		0.11074	6.18
0.1118	37.18		0.1115	17.21		0.1115	10.7		0.11154	6.18
0.1126	37.2		0.1123	17.24		0.1123	10.69		0.11233	6.19
0.1134	37.21		0.1131	17.27		0.1131	10.69		0.11313	6.18
0.1142	37.24		0.1139	17.3		0.1139	10.69		0.11393	6.17
0.115	37.25		0.1147	17.34		0.1147	10.69		0.11472	6.16
0.1158	37.24		0.1155	17.38		0.1155	10.71		0.11552	6.15
0.1166	37.22		0.1163	17.41		0.1163	10.72		0.11632	6.15
0.1174	37.2		0.1171	17.44		0.1171	10.72		0.11711	6.15
0.1182	37.2		0.1179	17.47		0.1179	10.73		0.11791	6.14
0.119	37.22		0.1187	17.5		0.1187	10.73		0.11871	6.12
0.1198	37.21		0.1195	17.53		0.1195	10.72		0.1195	6.11
0.1206	37.2		0.1203	17.56		0.1203	10.71		0.1203	6.1
0.1214	37.2		0.1211	17.59		0.1211	10.7		0.1211	6.09
0.1222	37.2		0.1219	17.61		0.1219	10.7		0.12189	6.09
0.123	37.21		0.1227	17.63		0.1227	10.7		0.12269	6.09
0.1238	37.21		0.1235	17.65		0.1235	10.71		0.12349	6.09
0.1246	37.21		0.1243	17.66		0.1243	10.73		0.12428	6.09
0.1254	37.2		0.1251	17.68		0.1251	10.75		0.12508	6.09
0.1262	37.17		0.1259	17.7		0.1259	10.78		0.12588	6.09
0.127	37.16		0.1267	17.72		0.1267	10.81		0.12667	6.09
0.1278	37.15		0.1275	17.74		0.1275	10.84		0.12747	6.09
0.1286	37.14		0.1283	17.76		0.1283	10.86		0.12827	6.07
0.1294	37.14		0.1291	17.79		0.1291	10.89		0.12906	6.05
0.1302	37.15		0.1299	17.82		0.1299	10.91		0.12986	6.04
0.131	37.15		0.1307	17.85		0.1307	10.94		0.13066	6.03
0.1318	37.14		0.1315	17.87		0.1315	10.97		0.13145	6.01
0.1326	37.13		0.1322	17.89		0.1322	11		0.13225	5.99
0.1334	37.12		0.133	17.9		0.133	11.03		0.13305	5.98
0.1342	37.14		0.1338	17.91		0.1338	11.05		0.13384	5.98
0.135	37.14		0.1346	17.92		0.1346	11.07		0.13464	5.98
0.1358	37.12		0.1354	17.93		0.1354	11.09		0.13544	5.98
0.1366	37.1		0.1362	17.93		0.1362	11.11		0.13623	5.98
0.1374	37.05		0.137	17.93		0.137	11.14		0.13703	5.98
0.1382	37.01		0.1378	17.93		0.1378	11.17		0.13783	5.98
0.139	36.96		0.1386	17.94		0.1386	11.19		0.13862	5.98
0.1398	36.93		0.1394	17.93		0.1394	11.21		0.13942	5.98
0.1406	36.91		0.1402	17.93		0.1402	11.22		0.14022	5.98
0.1414	36.89		0.141	17.95		0.141	11.23		0.14101	5.97
0.1422	36.86		0.1418	17.97		0.1418	11.24		0.14181	5.97
0.143	36.83		0.1426	17.99		0.1426	11.25		0.14261	5.97
0.1438	36.81		0.1434	18.01		0.1434	11.26		0.1434	5.96
0.1446	36.79		0.1442	18.04		0.1442	11.27		0.1442	5.95
0.1454	36.77		0.145	18.06		0.145	11.28		0.145	5.94
0.1462	36.76		0.1458	18.08		0.1458	11.29		0.14579	5.93
0.147	36.75		0.1466	18.09		0.1466	11.3		0.14659	5.92
0.1478	36.74		0.1474	18.1		0.1474	11.31		0.14739	5.91
0.1486	36.74		0.1482	18.12		0.1482	11.32		0.14818	5.9
0.1494	36.73		0.149	18.15		0.149	11.33		0.14898	5.9
0.1502	36.74		0.1498	18.18		0.1498	11.34		0.14978	5.9
0.151	36.75		0.1506	18.21		0.1506	11.35		0.15057	5.9
0.1518	36.75		0.1514	18.24		0.1514	11.36		0.15137	5.9
0.1526	36.76		0.1522	18.26		0.1522	11.41		0.15217	5.91
0.1534	36.77		0.153	18.28		0.153	11.49		0.15296	5.91
0.1542	36.77		0.1538	18.3		0.1538	11.65		0.15376	5.91
0.155	36.75		0.1546	18.32		0.1546	11.86		0.15456	5.91
0.1558	36.74		0.1554	18.33		0.1554	12.05		0.15535	5.91
0.1565	36.73		0.1562	18.34		0.1562	12.18		0.15615	5.91
0.1573	36.73		0.1569	18.34		0.1569	12.25		0.15695	5.9
0.1581	36.78		0.1577	18.34		0.1577	12.28		0.15774	5.89
0.1589	36.83		0.1585	18.33		0.1585	12.29		0.15854	5.88
0.1597	36.88		0.1593	18.32		0.1593	12.3		0.15934	5.88
0.1605	36.93		0.1601	18.31		0.1601	12.31		0.16013	5.88
0.1613	36.95		0.1609	18.31		0.1609	12.32		0.16093	5.88
0.1621	36.96		0.1617	18.31		0.1617	12.33		0.16173	5.87
0.1629	36.95		0.1625	18.31		0.1625	12.34		0.16252	5.86
0.1637	36.94		0.1633	18.32		0.1633	12.35		0.16332	5.85
0.1645	36.93		0.1641	18.34		0.1641	12.35		0.16412	5.84
0.1653	36.91		0.1649	18.36		0.1649	12.36		0.16491	5.83
0.1661	36.91		0.1657	18.38		0.1657	12.38		0.16571	5.83
0.1669	36.89		0.1665	18.41		0.1665	12.4		0.16651	5.83
0.1677	36.86		0.1673	18.44		0.1673	12.42		0.1673	5.83
0.1685	36.84		0.1681	18.46		0.1681	12.45		0.1681	5.83
0.1693	36.82		0.1689	18.48		0.1689	12.48		0.1689	5.83
0.1701	36.81		0.1697	18.5		0.1697	12.51		0.16969	5.83
0.1709	36.82		0.1705	18.53		0.1705	12.54		0.17049	5.83
0.1717	36.78		0.1713	18.54		0.1713	12.57		0.17129	5.83
0.1725	36.66		0.1721	18.54		0.1721	12.6		0.17208	5.83
0.1733	36.5		0.1729	18.53		0.1729	12.62		0.17288	5.83
0.1741	36.43		0.1737	18.53		0.1737	12.64		0.17368	5.83
0.1749	36.45		0.1745	18.52		0.1745	12.66		0.17447	5.83
0.1757	36.47		0.1753	18.51		0.1753	12.67		0.17527	5.83
0.1765	36.48		0.1761	18.51		0.1761	12.67		0.17607	5.83
0.1773	36.48		0.1769	18.52		0.1769	12.67		0.17686	5.83
0.1781	36.48		0.1777	18.52		0.1777	12.66		0.17766	5.83
0.1789	36.48		0.1785	18.52		0.1785	12.65		0.17846	5.83
0.1797	36.47		0.1793	18.52		0.1793	12.64		0.17925	5.82
0.1805	36.4		0.1801	18.51		0.1801	12.63		0.18005	5.82
0.1813	36.36		0.1808	18.51		0.1808	12.62		0.18085	5.81
0.1821	36.36		0.1816	18.5		0.1816	12.6		0.18164	5.79
0.1829	36.37		0.1824	18.5		0.1824	12.59		0.18244	5.78
0.1837	36.36		0.1832	18.5		0.1832	12.57		0.18324	5.77
0.1845	36.36		0.184	18.51		0.184	12.55		0.18403	5.76
0.1853	36.38		0.1848	18.52		0.1848	12.55		0.18483	5.75
0.1861	36.39		0.1856	18.53		0.1856	12.55		0.18563	5.73
0.1869	36.4		0.1864	18.55		0.1864	12.54		0.18642	5.72
0.1877	36.41		0.1872	18.56		0.1872	12.53		0.18722	5.71
0.1885	36.42		0.188	18.57		0.188	12.52		0.18802	5.71
0.1893	36.44		0.1888	18.58		0.1888	12.52		0.18881	5.71
0.1901	36.45		0.1896	18.6		0.1896	12.52		0.18961	5.71
0.1909	36.49		0.1904	18.61		0.1904	12.52		0.19041	5.71
0.1917	36.52		0.1912	18.62		0.1912	12.52		0.1912	5.71
0.1925	36.52		0.192	18.62		0.192	12.51		0.192	5.7
0.1933	36.53		0.1928	18.62		0.1928	12.49		0.1928	5.7
0.1941	36.53		0.1936	18.62		0.1936	12.47		0.19359	5.7
0.1949	36.53		0.1944	18.62		0.1944	12.45		0.19439	5.7
0.1957	36.56		0.1952	18.62		0.1952	12.41		0.19519	5.7
0.1965	36.6		0.196	18.62		0.196	12.38		0.19598	5.7
0.1973	36.64		0.1968	18.62		0.1968	12.35		0.19678	5.7
0.1981	36.68		0.1976	18.62		0.1976	12.32		0.19758	5.7
0.1989	36.71		0.1984	18.63		0.1984	12.31		0.19837	5.71
0.1997	36.76		0.1992	18.64		0.1992	12.3		0.19917	5.71
0.2005	36.81		0.2	18.65		0.2	12.29		0.19997	5.71
0.2013	36.91		0.2008	18.66		0.2008	12.28		0.20076	5.71
0.2021	37.08		0.2016	18.66		0.2016	12.27		0.20156	5.71
0.2029	37.23		0.2024	18.66		0.2024	12.26		0.20236	5.71
0.2037	37.3		0.2032	18.66		0.2032	12.24		0.20315	5.71
0.2045	37.33		0.204	18.67		0.204	12.21		0.20395	5.71
0.2053	37.36		0.2047	18.67		0.2047	12.18		0.20475	5.7
0.2061	37.4		0.2055	18.67		0.2055	12.15		0.20554	5.69
0.2069	37.43		0.2063	18.65		0.2063	12.11		0.20634	5.68
0.2077	37.48		0.2071	18.63		0.2071	12.07		0.20714	5.68
0.2085	37.53		0.2079	18.61		0.2079	12.04		0.20793	5.69
0.2093	37.57		0.2087	18.59		0.2087	12.01		0.20873	5.7
0.2101	37.58		0.2095	18.57		0.2095	11.99		0.20953	5.7
0.2109	37.59		0.2103	18.54		0.2103	11.97		0.21033	5.69
0.2117	37.6		0.2111	18.52		0.2111	11.94		0.21112	5.69
0.2125	37.62		0.2119	18.5		0.2119	11.91		0.21192	5.69
0.2133	37.64		0.2127	18.49		0.2127	11.89		0.21272	5.7
0.2141	37.66		0.2135	18.48		0.2135	11.88		0.21351	5.7
0.2149	37.73		0.2143	18.46		0.2143	11.87		0.21431	5.7
0.2157	37.79		0.2151	18.45		0.2151	11.86		0.21511	5.7
0.2165	37.83		0.2159	18.44		0.2159	11.85		0.2159	5.7
0.2173	38.09		0.2167	18.44		0.2167	11.84		0.2167	5.7
0.2181	38.48		0.2175	18.44		0.2175	11.83		0.2175	5.7
0.2188	38.72		0.2183	18.44		0.2183	11.83		0.21829	5.69
0.2196	38.76		0.2191	18.45		0.2191	11.83		0.21909	5.68
0.2204	38.8		0.2199	18.45		0.2199	11.83		0.21989	5.67
0.2212	38.84		0.2207	18.44		0.2207	11.83		0.22068	5.67
0.222	38.91		0.2215	18.43		0.2215	11.83		0.22148	5.66
0.2228	39.01		0.2223	18.42		0.2223	11.82		0.22228	5.65
0.2236	39.11		0.2231	18.41		0.2231	11.81		0.22307	5.66
0.2244	39.16		0.2239	18.4		0.2239	11.8		0.22387	5.67
0.2252	39.2		0.2247	18.39		0.2247	11.79		0.22467	5.68
0.226	39.25		0.2255	18.37		0.2255	11.78		0.22546	5.69
0.2268	39.28		0.2263	18.35		0.2263	11.77		0.22626	5.7
0.2276	39.28		0.2271	18.34		0.2271	11.76		0.22706	5.71
0.2284	39.28		0.2279	18.33		0.2279	11.75		0.22785	5.71
0.2292	39.28		0.2286	18.34		0.2286	11.74		0.22865	5.71
0.23	39.27		0.2294	18.35		0.2294	11.73		0.22945	5.71
0.2308	39.25		0.2302	18.36		0.2302	11.72		0.23024	5.72
0.2316	39.23		0.231	18.37		0.231	11.7		0.23104	5.73
0.2324	39.21		0.2318	18.38		0.2318	11.64		0.23184	5.73
0.2332	39.18		0.2326	18.38		0.2326	11.54		0.23263	5.73
0.234	39.16		0.2334	18.38		0.2334	11.37		0.23343	5.73
0.2348	39.16		0.2342	18.37		0.2342	11.16		0.23423	5.73
0.2356	39.15		0.235	18.37		0.235	10.96		0.23502	5.73
0.2364	39.18		0.2358	18.37		0.2358	10.83		0.23582	5.73
0.2372	39.21		0.2366	18.37		0.2366	10.76		0.23662	5.73
0.238	39.17		0.2374	18.36		0.2374	10.73		0.23741	5.73
0.2388	39.09		0.2382	18.36		0.2382	10.71		0.23821	5.73
0.2396	39		0.239	18.36		0.239	10.7		0.23901	5.74
0.2404	38.9		0.2398	18.36		0.2398	10.69		0.2398	5.75
0.2412	38.83		0.2406	18.35		0.2406	10.68		0.2406	5.75
0.242	38.76		0.2414	18.33		0.2414	10.67		0.2414	5.76
0.2428	38.7		0.2422	18.31		0.2422	10.66		0.24219	5.77
0.2436	38.65		0.243	18.28		0.243	10.65		0.24299	5.78
0.2444	38.6		0.2438	18.24		0.2438	10.64		0.24379	5.79
0.2452	38.53		0.2446	18.19		0.2446	10.62		0.24458	5.8
0.246	38.44		0.2454	18.15		0.2454	10.6		0.24538	5.8
0.2468	38.42		0.2462	18.1		0.2462	10.58		0.24618	5.79
0.2476	38.45		0.247	18.04		0.247	10.55		0.24697	5.79
0.2484	38.4		0.2478	17.99		0.2478	10.51		0.24777	5.79
0.2492	38.3		0.2486	17.94		0.2486	10.48		0.24857	5.79
0.25	38.23		0.2494	17.9		0.2494	10.45		0.24936	5.78
0.2508	38.15		0.2502	17.86		0.2502	10.42		0.25016	5.77
0.2516	38.05		0.251	17.84		0.251	10.4		0.25096	5.76
0.2524	37.98		0.2518	17.83		0.2518	10.39		0.25175	5.75
0.2532	37.91		0.2525	17.82		0.2525	10.39		0.25255	5.75
0.254	37.85		0.2533	17.82		0.2533	10.39		0.25335	5.75
0.2548	37.77		0.2541	17.83		0.2541	10.39		0.25414	5.75
0.2556	37.67		0.2549	17.84		0.2549	10.4		0.25494	5.76
0.2564	37.59		0.2557	17.84		0.2557	10.42		0.25574	5.76
0.2572	37.48		0.2565	17.83		0.2565	10.44		0.25653	5.76
0.258	37.4		0.2573	17.83		0.2573	10.45		0.25733	5.76
0.2588	37.32		0.2581	17.84		0.2581	10.46		0.25813	5.76
0.2596	37.22		0.2589	17.85		0.2589	10.47		0.25892	5.76
0.2604	37.17		0.2597	17.85		0.2597	10.48		0.25972	5.75
0.2612	37.12		0.2605	17.85		0.2605	10.49		0.26052	5.75
0.262	37.16		0.2613	17.86		0.2613	10.51		0.26131	5.75
0.2628	37.24		0.2621	17.88		0.2621	10.52		0.26211	5.75
0.2636	37.27		0.2629	17.89		0.2629	10.54		0.26291	5.75
0.2644	37.19		0.2637	17.9		0.2637	10.56		0.2637	5.75
0.2652	37.06		0.2645	17.91		0.2645	10.57		0.2645	5.76
0.266	36.96		0.2653	17.92		0.2653	10.58		0.2653	5.77
0.2668	36.85		0.2661	17.92		0.2661	10.59		0.26609	5.78
0.2676	36.71		0.2669	17.93		0.2669	10.6		0.26689	5.78
0.2684	36.57		0.2677	17.93		0.2677	10.62		0.26769	5.77
0.2692	36.43		0.2685	17.93		0.2685	10.63		0.26848	5.76
0.27	36.31		0.2693	17.93		0.2693	10.64		0.26928	5.75
0.2708	36.2		0.2701	17.94		0.2701	10.64		0.27008	5.74
0.2716	36.06		0.2709	17.96		0.2709	10.64		0.27087	5.73
0.2724	35.94		0.2717	17.99		0.2717	10.65		0.27167	5.72
0.2732	35.88		0.2725	18.02		0.2725	10.66		0.27247	5.71
0.274	35.84		0.2733	18.04		0.2733	10.67		0.27326	5.7
0.2748	35.76		0.2741	18.06		0.2741	10.68		0.27406	5.7
0.2756	35.66		0.2749	18.08		0.2749	10.69		0.27486	5.7
0.2764	35.57		0.2757	18.1		0.2757	10.71		0.27565	5.7
0.2772	35.56		0.2764	18.13		0.2764	10.74		0.27645	5.7
0.278	35.58		0.2772	18.15		0.2772	10.77		0.27725	5.7
0.2788	35.63		0.278	18.15		0.278	10.79		0.27804	5.7
0.2796	35.67		0.2788	18.15		0.2788	10.81		0.27884	5.7
0.2804	35.69		0.2796	18.16		0.2796	10.82		0.27964	5.7
0.2812	35.64		0.2804	18.17		0.2804	10.83		0.28043	5.7
0.2819	35.5		0.2812	18.18		0.2812	10.84		0.28123	5.7
0.2827	35.37		0.282	18.19		0.282	10.85		0.28203	5.7
0.2835	35.31		0.2828	18.2		0.2828	10.86		0.28282	5.7
0.2843	35.26		0.2836	18.21		0.2836	10.87		0.28362	5.7
0.2851	35.21		0.2844	18.22		0.2844	10.88		0.28442	5.71
0.2859	35.19		0.2852	18.23		0.2852	10.88		0.28521	5.72
0.2867	35.17		0.286	18.24		0.286	10.89		0.28601	5.73
0.2875	35.15		0.2868	18.26		0.2868	10.91		0.28681	5.73
0.2883	35.14		0.2876	18.28		0.2876	10.93		0.2876	5.73
0.2891	35.11		0.2884	18.31		0.2884	10.95		0.2884	5.73
0.2899	35.08		0.2892	18.34		0.2892	10.97		0.2892	5.72
0.2907	35.04		0.29	18.38		0.29	10.99		0.28999	5.73
0.2915	35.02		0.2908	18.41		0.2908	11.02		0.29079	5.73
0.2923	35		0.2916	18.44		0.2916	11.05		0.29159	5.73
0.2931	34.97		0.2924	18.47		0.2924	11.07		0.29238	5.72
0.2939	34.93		0.2932	18.5		0.2932	11.09		0.29318	5.71
0.2947	34.85		0.294	18.53		0.294	11.11		0.29398	5.7
0.2955	34.78		0.2948	18.55		0.2948	11.13		0.29477	5.69
0.2963	34.72		0.2956	18.56		0.2956	11.15		0.29557	5.69
0.2971	34.46		0.2964	18.57		0.2964	11.17		0.29637	5.69
0.2979	34.11		0.2972	18.57		0.2972	11.19		0.29716	5.69
0.2987	33.91		0.298	18.56		0.298	11.21		0.29796	5.7
0.2995	33.91		0.2988	18.55		0.2988	11.23		0.29876	5.71
0.3003	33.89		0.2996	18.54		0.2996	11.26		0.29955	5.71
0.3011	33.86		0.3004	18.53		0.3004	11.29		0.30035	5.71
0.3019	33.8		0.3011	18.52		0.3011	11.32		0.30115	5.71
0.3027	33.72		0.3019	18.51		0.3019	11.36		0.30194	5.71
0.3035	33.66		0.3027	18.5		0.3027	11.41		0.30274	5.7
0.3043	33.63		0.3035	18.48		0.3035	11.46		0.30354	5.7
0.3051	33.6		0.3043	18.46		0.3043	11.51		0.30433	5.69
0.3059	33.57		0.3051	18.45		0.3051	11.56		0.30513	5.68
0.3067	33.56		0.3059	18.44		0.3059	11.61		0.30593	5.68
0.3075	33.6		0.3067	18.42		0.3067	11.66		0.30672	5.67
0.3083	33.64		0.3075	18.4		0.3075	11.71		0.30752	5.67
0.3091	33.69		0.3083	18.36		0.3083	11.76		0.30832	5.67
0.3099	33.75		0.3091	18.32		0.3091	11.81		0.30911	5.67
0.3107	33.79		0.3099	18.28		0.3099	11.85		0.30991	5.67
0.3115	33.83		0.3107	18.25		0.3107	11.9		0.31071	5.67
0.3123	33.85		0.3115	18.22		0.3115	11.95		0.3115	5.66
0.3131	33.89		0.3123	18.2		0.3123	12		0.3123	5.65
0.3139	33.92		0.3131	18.18		0.3131	12.04		0.3131	5.64
0.3147	33.94		0.3139	18.17		0.3139	12.08		0.31389	5.64
0.3155	33.94		0.3147	18.16		0.3147	12.12		0.31469	5.64
0.3163	33.88		0.3155	18.14		0.3155	12.16		0.31549	5.64
0.3171	33.83		0.3163	18.12		0.3163	12.2		0.31628	5.65
0.3179	33.8		0.3171	18.11		0.3171	12.24		0.31708	5.65
0.3187	33.81		0.3179	18.1		0.3179	12.29		0.31788	5.65
0.3195	33.81		0.3187	18.09		0.3187	12.33		0.31867	5.64
0.3203	33.84		0.3195	18.08		0.3195	12.36		0.31947	5.62
0.3211	33.84		0.3203	18.07		0.3203	12.39		0.32027	5.61
0.3219	33.85		0.3211	18.07		0.3211	12.42		0.32106	5.6
0.3227	33.86		0.3219	18.07		0.3219	12.45		0.32186	5.6
0.3235	33.92		0.3227	18.07		0.3227	12.49		0.32266	5.6
0.3243	33.98		0.3235	18.07		0.3235	12.53		0.32345	5.6
0.3251	34.02		0.3243	18.07		0.3243	12.57		0.32425	5.6
0.3259	34.04		0.325	18.06		0.325	12.61		0.32505	5.6
0.3267	33.99		0.3258	18.06		0.3258	12.65		0.32584	5.61
0.3275	33.89		0.3266	18.07		0.3266	12.7		0.32664	5.61
0.3283	33.9		0.3274	18.07		0.3274	12.75		0.32744	5.6
0.3291	33.98		0.3282	18.07		0.3282	12.79		0.32823	5.59
0.3299	34.04		0.329	18.06		0.329	12.83		0.32903	5.6
0.3307	34.08		0.3298	18.05		0.3298	12.87		0.32983	5.61
0.3315	34.12		0.3306	18.03		0.3306	12.91		0.33062	5.62
0.3323	34.12		0.3314	18.01		0.3314	12.94		0.33142	5.64
0.3331	34.14		0.3322	17.99		0.3322	12.97		0.33222	5.66
0.3339	34.1		0.333	17.95		0.333	13		0.33301	5.69
0.3347	34.07		0.3338	17.91		0.3338	13.02		0.33381	5.73
0.3355	34.05		0.3346	17.87		0.3346	13.04		0.33461	5.75
0.3363	34		0.3354	17.82		0.3354	13.06		0.3354	5.77
0.3371	33.99		0.3362	17.79		0.3362	13.08		0.3362	5.78
0.3379	33.95		0.337	17.76		0.337	13.11		0.337	5.79
0.3387	33.91		0.3378	17.72		0.3378	13.14		0.33779	5.79
0.3395	33.89		0.3386	17.69		0.3386	13.18		0.33859	5.8
0.3403	33.82		0.3394	17.67		0.3394	13.22		0.33939	5.81
0.3411	33.75		0.3402	17.65		0.3402	13.26		0.34018	5.82
0.3419	33.58		0.341	17.63		0.341	13.3		0.34098	5.83
0.3427	33.38		0.3418	17.6		0.3418	13.33		0.34178	5.83
0.3435	33.23		0.3426	17.58		0.3426	13.36		0.34257	5.83
0.3442	33.2		0.3434	17.55		0.3434	13.39		0.34337	5.83
0.345	33.22		0.3442	17.52		0.3442	13.42		0.34417	5.82
0.3458	33.2		0.345	17.49		0.345	13.45		0.34496	5.83
0.3466	33.2		0.3458	17.47		0.3458	13.48		0.34576	5.84
0.3474	33.24		0.3466	17.45		0.3466	13.51		0.34656	5.87
0.3482	33.28		0.3474	17.43		0.3474	13.54		0.34736	5.9
0.349	33.34		0.3482	17.41		0.3482	13.57		0.34815	5.94
0.3498	33.39		0.3489	17.38		0.3489	13.6		0.34895	5.97
0.3506	33.39		0.3497	17.35		0.3497	13.65		0.34975	6
0.3514	33.39		0.3505	17.31		0.3505	13.7		0.35054	6.02
0.3522	33.38		0.3513	17.27		0.3513	13.75		0.35134	6.04
0.353	33.3		0.3521	17.23		0.3521	13.8		0.35214	6.06
0.3538	33.22		0.3529	17.21		0.3529	13.85		0.35293	6.09
0.3546	33.19		0.3537	17.19		0.3537	13.91		0.35373	6.11
0.3554	33.16		0.3545	17.17		0.3545	13.96		0.35453	6.13
0.3562	33.11		0.3553	17.15		0.3553	14		0.35532	6.15
0.357	32.96		0.3561	17.11		0.3561	14.03		0.35612	6.15
0.3578	32.75		0.3569	17.08		0.3569	14.05		0.35692	6.15
0.3586	32.53		0.3577	17.06		0.3577	14.07		0.35771	6.15
0.3594	32.3		0.3585	17.04		0.3585	14.1		0.35851	6.15
0.3602	32.1		0.3593	17.01		0.3593	14.13		0.35931	6.15
0.361	31.91		0.3601	16.98		0.3601	14.16		0.3601	6.15
0.3618	31.76		0.3609	16.97		0.3609	14.19		0.3609	6.15
0.3626	31.64		0.3617	16.96		0.3617	14.22		0.3617	6.15
0.3634	31.52		0.3625	16.96		0.3625	14.25		0.36249	6.15
0.3642	31.42		0.3633	16.96		0.3633	14.28		0.36329	6.15
0.365	31.34		0.3641	16.96		0.3641	14.31		0.36409	6.15
0.3658	31.25		0.3649	16.96		0.3649	14.34		0.36488	6.15
0.3666	31.15		0.3657	16.98		0.3657	14.37		0.36568	6.15
0.3674	31.05		0.3665	16.99		0.3665	14.39		0.36648	6.15
0.3682	30.96		0.3673	17		0.3673	14.41		0.36727	6.15
0.369	30.91		0.3681	17		0.3681	14.43		0.36807	6.15
0.3698	30.89		0.3689	17		0.3689	14.45		0.36887	6.16
0.3706	30.89		0.3697	17.01		0.3697	14.47		0.36966	6.16
0.3714	30.87		0.3705	17.01		0.3705	14.49		0.37046	6.17
0.3722	30.9		0.3713	17		0.3713	14.51		0.37126	6.18
0.373	30.94		0.3721	16.99		0.3721	14.52		0.37205	6.19
0.3738	30.97		0.3728	16.97		0.3728	14.53		0.37285	6.2
0.3746	30.97		0.3736	16.96		0.3736	14.54		0.37365	6.21
0.3754	30.96		0.3744	16.95		0.3744	14.56		0.37444	6.22
0.3762	30.91		0.3752	16.95		0.3752	14.58		0.37524	6.22
0.377	30.82		0.376	16.94		0.376	14.59		0.37604	6.22
0.3778	30.72		0.3768	16.94		0.3768	14.6		0.37683	6.22
0.3786	30.59		0.3776	16.94		0.3776	14.61		0.37763	6.23
0.3794	30.45		0.3784	16.94		0.3784	14.61		0.37843	6.24
0.3802	30.3		0.3792	16.94		0.3792	14.6		0.37922	6.27
0.381	30.14		0.38	16.94		0.38	14.59		0.38002	6.3
0.3818	29.99		0.3808	16.95		0.3808	14.58		0.38082	6.33
0.3826	29.82		0.3816	16.96		0.3816	14.57		0.38161	6.36
0.3834	29.66		0.3824	16.96		0.3824	14.55		0.38241	6.4
0.3842	29.55		0.3832	16.97		0.3832	14.53		0.38321	6.44
0.385	29.44		0.384	16.98		0.384	14.52		0.384	6.5
0.3858	29.27		0.3848	16.99		0.3848	14.52		0.3848	6.57
0.3866	29.12		0.3856	17		0.3856	14.53		0.3856	6.64
0.3874	28.93		0.3864	17.02		0.3864	14.56		0.38639	6.74
0.3882	28.74		0.3872	17.04		0.3872	14.59		0.38719	6.86
0.389	28.53		0.388	17.06		0.388	14.61		0.38799	7
0.3898	28.31		0.3888	17.08		0.3888	14.61		0.38878	7.17
0.3906	28.1		0.3896	17.1		0.3896	14.61		0.38958	7.35
0.3914	27.89		0.3904	17.1		0.3904	14.61		0.39038	7.55
0.3922	27.69		0.3912	17.11		0.3912	14.61		0.39117	7.78
0.393	27.48		0.392	17.12		0.392	14.61		0.39197	8.02
0.3938	27.32		0.3928	17.13		0.3928	14.61		0.39277	8.28
0.3946	27.21		0.3936	17.14		0.3936	14.61		0.39356	8.53
0.3954	27.12		0.3944	17.15		0.3944	14.61		0.39436	8.78
0.3962	27.07		0.3952	17.17		0.3952	14.61		0.39516	9.04
0.397	27		0.396	17.19		0.396	14.61		0.39595	9.3
0.3978	26.94		0.3967	17.22		0.3967	14.6		0.39675	9.56
0.3986	26.92		0.3975	17.24		0.3975	14.59		0.39755	9.82
0.3994	26.92		0.3983	17.27		0.3983	14.58		0.39834	10.08
0.4002	26.86		0.3991	17.29		0.3991	14.58		0.39914	10.35
0.401	26.76		0.3999	17.31		0.3999	14.58		0.39994	10.62
0.4018	26.65		0.4007	17.33		0.4007	14.58		0.40073	10.9
0.4026	26.56		0.4015	17.35		0.4015	14.58		0.40153	11.17
0.4034	26.41		0.4023	17.38		0.4023	14.58		0.40233	11.45
0.4042	26.28		0.4031	17.41		0.4031	14.58		0.40312	11.73
0.405	26.16		0.4039	17.46		0.4039	14.58		0.40392	12
0.4058	26.04		0.4047	17.52		0.4047	14.58		0.40472	12.27
0.4065	25.93		0.4055	17.56		0.4055	14.58		0.40551	12.55
0.4073	25.81		0.4063	17.61		0.4063	14.57		0.40631	12.85
0.4081	25.64		0.4071	17.65		0.4071	14.57		0.40711	13.18
0.4089	25.47		0.4079	17.69		0.4079	14.56		0.4079	13.5
0.4097	25.29		0.4087	17.73		0.4087	14.55		0.4087	13.77
0.4105	25.12		0.4095	17.77		0.4095	14.54		0.4095	14.02
0.4113	24.95		0.4103	17.8		0.4103	14.53		0.41029	14.25
0.4121	24.78		0.4111	17.83		0.4111	14.52		0.41109	14.47
0.4129	24.6		0.4119	17.86		0.4119	14.51		0.41189	14.68
0.4137	24.47		0.4127	17.88		0.4127	14.5		0.41268	14.87
0.4145	24.34		0.4135	17.9		0.4135	14.5		0.41348	15.03
0.4153	24.22		0.4143	17.92		0.4143	14.5		0.41428	15.17
0.4161	24.11		0.4151	17.95		0.4151	14.5		0.41507	15.31
0.4169	24		0.4159	17.97		0.4159	14.5		0.41587	15.45
0.4177	23.9		0.4167	17.99		0.4167	14.51		0.41667	15.58
0.4185	23.81		0.4175	18.02		0.4175	14.52		0.41746	15.71
0.4193	23.74		0.4183	18.04		0.4183	14.52		0.41826	15.83
0.4201	23.65		0.4191	18.06		0.4191	14.52		0.41906	15.93
0.4209	23.55		0.4199	18.08		0.4199	14.52		0.41985	16.02
0.4217	23.47		0.4207	18.1		0.4207	14.52		0.42065	16.1
0.4225	23.39		0.4214	18.12		0.4214	14.53		0.42145	16.17
0.4233	23.32		0.4222	18.14		0.4222	14.54		0.42224	16.23
0.4241	23.23		0.423	18.17		0.423	14.55		0.42304	16.28
0.4249	23.1		0.4238	18.2		0.4238	14.56		0.42384	16.32
0.4257	22.98		0.4246	18.22		0.4246	14.57		0.42463	16.34
0.4265	22.86		0.4254	18.23		0.4254	14.58		0.42543	16.35
0.4273	22.75		0.4262	18.24		0.4262	14.59		0.42623	16.35
0.4281	22.67		0.427	18.25		0.427	14.59		0.42702	16.35
0.4289	22.63		0.4278	18.27		0.4278	14.59		0.42782	16.33
0.4297	22.62		0.4286	18.29		0.4286	14.59		0.42862	16.32
0.4305	22.63		0.4294	18.31		0.4294	14.58		0.42941	16.31
0.4313	22.63		0.4302	18.33		0.4302	14.57		0.43021	16.31
0.4321	22.63		0.431	18.34		0.431	14.56		0.43101	16.3
0.4329	22.64		0.4318	18.36		0.4318	14.54		0.4318	16.29
0.4337	22.67		0.4326	18.37		0.4326	14.52		0.4326	16.27
0.4345	22.73		0.4334	18.38		0.4334	14.49		0.4334	16.25
0.4353	22.81		0.4342	18.39		0.4342	14.47		0.43419	16.24
0.4361	22.86		0.435	18.4		0.435	14.46		0.43499	16.23
0.4369	22.91		0.4358	18.42		0.4358	14.45		0.43579	16.24
0.4377	22.96		0.4366	18.45		0.4366	14.45		0.43658	16.25
0.4385	22.99		0.4374	18.48		0.4374	14.45		0.43738	16.26
0.4393	23.03		0.4382	18.52		0.4382	14.44		0.43818	16.27
0.4401	23.07		0.439	18.56		0.439	14.43		0.43897	16.27
0.4409	23.11		0.4398	18.61		0.4398	14.42		0.43977	16.27
0.4417	23.14		0.4406	18.64		0.4406	14.41		0.44057	16.27
0.4425	23.1		0.4414	18.67		0.4414	14.4		0.44136	16.27
0.4433	23.04		0.4422	18.69		0.4422	14.39		0.44216	16.27
0.4441	22.97		0.443	18.7		0.443	14.39		0.44296	16.27
0.4449	22.91		0.4438	18.71		0.4438	14.39		0.44375	16.27
0.4457	22.87		0.4446	18.72		0.4446	14.39		0.44455	16.27
0.4465	22.84		0.4453	18.72		0.4453	14.4		0.44535	16.27
0.4473	22.8		0.4461	18.72		0.4461	14.41		0.44614	16.27
0.4481	22.75		0.4469	18.71		0.4469	14.41		0.44694	16.27
0.4489	22.66		0.4477	18.71		0.4477	14.41		0.44774	16.27
0.4497	22.53		0.4485	18.71		0.4485	14.41		0.44853	16.27
0.4505	22.41		0.4493	18.7		0.4493	14.4		0.44933	16.27
0.4513	22.29		0.4501	18.71		0.4501	14.39		0.45013	16.27
0.4521	22.13		0.4509	18.73		0.4509	14.39		0.45092	16.27
0.4529	21.96		0.4517	18.75		0.4517	14.4		0.45172	16.27
0.4537	21.79		0.4525	18.78		0.4525	14.41		0.45252	16.27
0.4545	21.64		0.4533	18.8		0.4533	14.42		0.45331	16.27
0.4553	21.48		0.4541	18.82		0.4541	14.42		0.45411	16.27
0.4561	21.38		0.4549	18.84		0.4549	14.41		0.45491	16.27
0.4569	21.3		0.4557	18.87		0.4557	14.41		0.4557	16.27
0.4577	21.18		0.4565	18.9		0.4565	14.41		0.4565	16.27
0.4585	21.09		0.4573	18.93		0.4573	14.42		0.4573	16.26
0.4593	21		0.4581	18.97		0.4581	14.44		0.45809	16.25
0.4601	20.95		0.4589	19.01		0.4589	14.46		0.45889	16.23
0.4609	20.91		0.4597	19.06		0.4597	14.48		0.45969	16.21
0.4617	20.87		0.4605	19.09		0.4605	14.5		0.46048	16.19
0.4625	20.86		0.4613	19.12		0.4613	14.52		0.46128	16.17
0.4633	20.85		0.4621	19.15		0.4621	14.54		0.46208	16.14
0.4641	20.8		0.4629	19.17		0.4629	14.56		0.46287	16.1
0.4649	20.77		0.4637	19.2		0.4637	14.57		0.46367	16.06
0.4657	20.74		0.4645	19.23		0.4645	14.57		0.46447	16.01
0.4665	20.7		0.4653	19.26		0.4653	14.56		0.46526	15.96
0.4673	20.67		0.4661	19.29		0.4661	14.53		0.46606	15.9
0.4681	20.66		0.4669	19.32		0.4669	14.5		0.46686	15.83
0.4688	20.67		0.4677	19.35		0.4677	14.48		0.46765	15.76
0.4696	20.7		0.4685	19.39		0.4685	14.48		0.46845	15.68
0.4704	20.77		0.4692	19.42		0.4692	14.49		0.46925	15.61
0.4712	20.82		0.47	19.46		0.47	14.5		0.47004	15.54
0.472	20.83		0.4708	19.48		0.4708	14.51		0.47084	15.46
0.4728	20.83		0.4716	19.51		0.4716	14.52		0.47164	15.39
0.4736	20.82		0.4724	19.53		0.4724	14.53		0.47243	15.31
0.4744	20.76		0.4732	19.55		0.4732	14.54		0.47323	15.25
0.4752	20.74		0.474	19.57		0.474	14.55		0.47403	15.21
0.476	20.73		0.4748	19.59		0.4748	14.55		0.47482	15.17
0.4768	20.72		0.4756	19.61		0.4756	14.55		0.47562	15.16
0.4776	20.7		0.4764	19.62		0.4764	14.56		0.47642	15.16
0.4784	20.62		0.4772	19.64		0.4772	14.57		0.47721	15.17
0.4792	20.52		0.478	19.65		0.478	14.59		0.47801	15.16
0.48	20.45		0.4788	19.67		0.4788	14.6		0.47881	15.16
0.4808	20.43		0.4796	19.69		0.4796	14.62		0.4796	15.16
0.4816	20.42		0.4804	19.71		0.4804	14.64		0.4804	15.15
0.4824	20.39		0.4812	19.73		0.4812	14.66		0.4812	15.16
0.4832	20.4		0.482	19.74		0.482	14.67		0.48199	15.16
0.484	20.41		0.4828	19.75		0.4828	14.68		0.48279	15.17
0.4848	20.45		0.4836	19.75		0.4836	14.69		0.48359	15.18
0.4856	20.54		0.4844	19.74		0.4844	14.7		0.48438	15.17
0.4864	20.62		0.4852	19.74		0.4852	14.71		0.48518	15.14
0.4872	20.71		0.486	19.73		0.486	14.72		0.48598	15.07
0.488	20.79		0.4868	19.72		0.4868	14.72		0.48678	14.96
0.4888	20.84		0.4876	19.71		0.4876	14.73		0.48757	14.83
0.4896	20.91		0.4884	19.7		0.4884	14.74		0.48837	14.7
0.4904	21.01		0.4892	19.69		0.4892	14.75		0.48917	14.56
0.4912	21.15		0.49	19.69		0.49	14.76		0.48996	14.43
0.492	21.26		0.4908	19.69		0.4908	14.77		0.49076	14.31
0.4928	21.36		0.4916	19.69		0.4916	14.78		0.49156	14.2
0.4936	21.49		0.4924	19.7		0.4924	14.78		0.49235	14.09
0.4944	21.62		0.4931	19.71		0.4931	14.78		0.49315	13.98
0.4952	21.75		0.4939	19.72		0.4939	14.78		0.49395	13.9
0.496	21.9		0.4947	19.73		0.4947	14.78		0.49474	13.82
0.4968	22.05		0.4955	19.73		0.4955	14.78		0.49554	13.75
0.4976	22.2		0.4963	19.73		0.4963	14.77		0.49634	13.67
0.4984	22.35		0.4971	19.73		0.4971	14.77		0.49713	13.59
0.4992	22.48		0.4979	19.74		0.4979	14.77		0.49793	13.51
0.5	22.61		0.4987	19.75		0.4987	14.77		0.49873	13.45
0.5008	22.76		0.4995	19.75		0.4995	14.76		0.49952	13.41
0.5016	22.89		0.5003	19.76		0.5003	14.75		0.50032	13.38
0.5024	23.01		0.5011	19.78		0.5011	14.75		0.50112	13.36
0.5032	23.11		0.5019	19.8		0.5019	14.75		0.50191	13.34
0.504	23.18		0.5027	19.8		0.5027	14.75		0.50271	13.33
0.5048	23.27		0.5035	19.81		0.5035	14.75		0.50351	13.32
0.5056	23.37		0.5043	19.83		0.5043	14.75		0.5043	13.31
0.5064	23.47		0.5051	19.85		0.5051	14.75		0.5051	13.31
0.5072	23.58		0.5059	19.87		0.5059	14.75		0.5059	13.32
0.508	23.68		0.5067	19.89		0.5067	14.75		0.50669	13.34
0.5088	23.7		0.5075	19.91		0.5075	14.75		0.50749	13.37
0.5096	23.68		0.5083	19.93		0.5083	14.75		0.50829	13.4
0.5104	23.67		0.5091	19.95		0.5091	14.75		0.50908	13.42
0.5112	23.68		0.5099	19.97		0.5099	14.75		0.50988	13.43
0.512	23.68		0.5107	20.01		0.5107	14.75		0.51068	13.44
0.5128	23.68		0.5115	20.05		0.5115	14.76		0.51147	13.45
0.5136	23.64		0.5123	20.08		0.5123	14.78		0.51227	13.46
0.5144	23.59		0.5131	20.12		0.5131	14.79		0.51307	13.47
0.5152	23.55		0.5139	20.16		0.5139	14.8		0.51386	13.46
0.516	23.52		0.5147	20.18		0.5147	14.81		0.51466	13.45
0.5168	23.5		0.5155	20.2		0.5155	14.82		0.51546	13.44
0.5176	23.52		0.5163	20.2		0.5163	14.83		0.51625	13.43
0.5184	23.58		0.517	20.2		0.517	14.84		0.51705	13.42
0.5192	23.65		0.5178	20.19		0.5178	14.85		0.51785	13.41
0.52	23.74		0.5186	20.18		0.5186	14.87		0.51864	13.41
0.5208	23.84		0.5194	20.15		0.5194	14.88		0.51944	13.41
0.5216	23.96		0.5202	20.13		0.5202	14.89		0.52024	13.41
0.5224	24.12		0.521	20.12		0.521	14.9		0.52103	13.41
0.5232	24.28		0.5218	20.11		0.5218	14.91		0.52183	13.41
0.524	24.46		0.5226	20.11		0.5226	14.91		0.52263	13.41
0.5248	24.63		0.5234	20.1		0.5234	14.91		0.52342	13.41
0.5256	24.76		0.5242	20.09		0.5242	14.91		0.52422	13.41
0.5264	24.9		0.525	20.09		0.525	14.9		0.52502	13.41
0.5272	25.05		0.5258	20.09		0.5258	14.89		0.52581	13.41
0.528	25.2		0.5266	20.1		0.5266	14.89		0.52661	13.41
0.5288	25.35		0.5274	20.1		0.5274	14.89		0.52741	13.42
0.5296	25.48		0.5282	20.1		0.5282	14.89		0.5282	13.43
0.5304	25.56		0.529	20.1		0.529	14.9		0.529	13.45
0.5312	25.63		0.5298	20.1		0.5298	14.91		0.5298	13.48
0.5319	25.71		0.5306	20.1		0.5306	14.91		0.53059	13.51
0.5327	25.85		0.5314	20.1		0.5314	14.91		0.53139	13.54
0.5335	25.99		0.5322	20.1		0.5322	14.91		0.53219	13.56
0.5343	26.13		0.533	20.11		0.533	14.91		0.53298	13.57
0.5351	26.29		0.5338	20.13		0.5338	14.91		0.53378	13.57
0.5359	26.41		0.5346	20.14		0.5346	14.92		0.53458	13.57
0.5367	26.48		0.5354	20.16		0.5354	14.93		0.53537	13.57
0.5375	26.58		0.5362	20.17		0.5362	14.94		0.53617	13.57
0.5383	26.69		0.537	20.19		0.537	14.95		0.53697	13.57
0.5391	26.85		0.5378	20.19		0.5378	14.96		0.53776	13.57
0.5399	27.05		0.5386	20.2		0.5386	14.98		0.53856	13.57
0.5407	27.23		0.5394	20.19		0.5394	15		0.53936	13.57
0.5415	27.43		0.5402	20.19		0.5402	15.02		0.54015	13.57
0.5423	27.59		0.5409	20.19		0.5409	15.05		0.54095	13.58
0.5431	27.71		0.5417	20.2		0.5417	15.09		0.54175	13.59
0.5439	27.86		0.5425	20.22		0.5425	15.12		0.54254	13.6
0.5447	28.02		0.5433	20.23		0.5433	15.15		0.54334	13.61
0.5455	28.19		0.5441	20.24		0.5441	15.18		0.54414	13.62
0.5463	28.32		0.5449	20.25		0.5449	15.21		0.54493	13.61
0.5471	28.42		0.5457	20.26		0.5457	15.24		0.54573	13.58
0.5479	28.51		0.5465	20.28		0.5465	15.27		0.54653	13.54
0.5487	28.62		0.5473	20.3		0.5473	15.3		0.54732	13.48
0.5495	28.75		0.5481	20.32		0.5481	15.32		0.54812	13.4
0.5503	28.81		0.5489	20.36		0.5489	15.34		0.54892	13.29
0.5511	28.88		0.5497	20.39		0.5497	15.35		0.54971	13.15
0.5519	29.01		0.5505	20.42		0.5505	15.36		0.55051	13
0.5527	29.11		0.5513	20.45		0.5513	15.37		0.55131	12.84
0.5535	29.15		0.5521	20.49		0.5521	15.37		0.5521	12.67
0.5543	29.2		0.5529	20.54		0.5529	15.37		0.5529	12.48
0.5551	29.24		0.5537	20.58		0.5537	15.37		0.5537	12.27
0.5559	29.27		0.5545	20.61		0.5545	15.39		0.55449	12.05
0.5567	29.32		0.5553	20.63		0.5553	15.41		0.55529	11.8
0.5575	29.4		0.5561	20.66		0.5561	15.43		0.55609	11.54
0.5583	29.5		0.5569	20.67		0.5569	15.45		0.55688	11.28
0.5591	29.61		0.5577	20.67		0.5577	15.46		0.55768	11.04
0.5599	29.68		0.5585	20.66		0.5585	15.48		0.55848	10.79
0.5607	29.73		0.5593	20.65		0.5593	15.48		0.55927	10.53
0.5615	29.8		0.5601	20.63		0.5601	15.49		0.56007	10.27
0.5623	29.84		0.5609	20.61		0.5609	15.5		0.56087	9.99
0.5631	29.83		0.5617	20.59		0.5617	15.52		0.56166	9.71
0.5639	29.8		0.5625	20.56		0.5625	15.54		0.56246	9.42
0.5647	29.79		0.5633	20.53		0.5633	15.55		0.56326	9.14
0.5655	29.78		0.5641	20.5		0.5641	15.56		0.56405	8.88
0.5663	29.8		0.5649	20.47		0.5649	15.56		0.56485	8.63
0.5671	29.83		0.5656	20.44		0.5656	15.56		0.56565	8.4
0.5679	29.89		0.5664	20.42		0.5664	15.56		0.56644	8.19
0.5687	29.95		0.5672	20.4		0.5672	15.56		0.56724	8.01
0.5695	29.98		0.568	20.38		0.568	15.57		0.56804	7.87
0.5703	29.98		0.5688	20.36		0.5688	15.57		0.56883	7.76
0.5711	29.97		0.5696	20.33		0.5696	15.57		0.56963	7.66
0.5719	29.97		0.5704	20.3		0.5704	15.57		0.57043	7.55
0.5727	29.99		0.5712	20.27		0.5712	15.57		0.57122	7.43
0.5735	30.02		0.572	20.24		0.572	15.58		0.57202	7.32
0.5743	30.07		0.5728	20.21		0.5728	15.59		0.57282	7.24
0.5751	30.12		0.5736	20.18		0.5736	15.6		0.57361	7.16
0.5759	30.16		0.5744	20.15		0.5744	15.61		0.57441	7.09
0.5767	30.24		0.5752	20.13		0.5752	15.62		0.57521	7.02
0.5775	30.33		0.576	20.13		0.576	15.63		0.576	6.97
0.5783	30.41		0.5768	20.11		0.5768	15.64		0.5768	6.92
0.5791	30.48		0.5776	20.09		0.5776	15.65		0.5776	6.88
0.5799	30.56		0.5784	20.07		0.5784	15.66		0.57839	6.84
0.5807	30.61		0.5792	20.06		0.5792	15.68		0.57919	6.79
0.5815	30.65		0.58	20.06		0.58	15.7		0.57999	6.74
0.5823	30.65		0.5808	20.05		0.5808	15.71		0.58078	6.69
0.5831	30.66		0.5816	20.04		0.5816	15.72		0.58158	6.65
0.5839	30.7		0.5824	20.04		0.5824	15.73		0.58238	6.61
0.5847	30.75		0.5832	20.03		0.5832	15.74		0.58317	6.58
0.5855	30.8		0.584	20.03		0.584	15.76		0.58397	6.56
0.5863	30.84		0.5848	20.03		0.5848	15.78		0.58477	6.54
0.5871	30.84		0.5856	20.02		0.5856	15.8		0.58556	6.51
0.5879	30.82		0.5864	20.01		0.5864	15.83		0.58636	6.47
0.5887	30.81		0.5872	20		0.5872	15.85		0.58716	6.43
0.5895	30.81		0.588	19.98		0.588	15.87		0.58795	6.39
0.5903	30.8		0.5888	19.96		0.5888	15.88		0.58875	6.36
0.5911	30.8		0.5895	19.94		0.5895	15.89		0.58955	6.35
0.5919	30.81		0.5903	19.91		0.5903	15.9		0.59034	6.34
0.5927	30.77		0.5911	19.87		0.5911	15.91		0.59114	6.33
0.5935	30.71		0.5919	19.84		0.5919	15.91		0.59194	6.32
0.5942	30.62		0.5927	19.8		0.5927	15.92		0.59273	6.31
0.595	30.5		0.5935	19.75		0.5935	15.93		0.59353	6.32
0.5958	30.43		0.5943	19.72		0.5943	15.93		0.59433	6.33
0.5966	30.4		0.5951	19.7		0.5951	15.93		0.59512	6.34
0.5974	30.38		0.5959	19.68		0.5959	15.93		0.59592	6.35
0.5982	30.34		0.5967	19.66		0.5967	15.93		0.59672	6.35
0.599	30.29		0.5975	19.63		0.5975	15.93		0.59751	6.35
0.5998	30.21		0.5983	19.6		0.5983	15.93		0.59831	6.35
0.6006	30.13		0.5991	19.58		0.5991	15.94		0.59911	6.35
0.6014	30.03		0.5999	19.56		0.5999	15.95		0.5999	6.36
0.6022	29.94		0.6007	19.52		0.6007	15.96		0.6007	6.37
0.603	29.86		0.6015	19.48		0.6015	15.96		0.6015	6.38
0.6038	29.78		0.6023	19.44		0.6023	15.96		0.60229	6.38
0.6046	29.68		0.6031	19.41		0.6031	15.96		0.60309	6.38
0.6054	29.59		0.6039	19.38		0.6039	15.96		0.60389	6.38
0.6062	29.51		0.6047	19.35		0.6047	15.96		0.60468	6.38
0.607	29.41		0.6055	19.32		0.6055	15.95		0.60548	6.38
0.6078	29.29		0.6063	19.29		0.6063	15.94		0.60628	6.38
0.6086	29.17		0.6071	19.26		0.6071	15.94		0.60707	6.37
0.6094	29.07		0.6079	19.24		0.6079	15.93		0.60787	6.36
0.6102	29		0.6087	19.22		0.6087	15.92		0.60867	6.33
0.611	28.93		0.6095	19.19		0.6095	15.91		0.60946	6.29
0.6118	28.82		0.6103	19.16		0.6103	15.9		0.61026	6.25
0.6126	28.67		0.6111	19.13		0.6111	15.89		0.61106	6.21
0.6134	28.53		0.6119	19.1		0.6119	15.88		0.61185	6.19
0.6142	28.42		0.6127	19.07		0.6127	15.87		0.61265	6.18
0.615	28.32		0.6134	19.03		0.6134	15.86		0.61345	6.18
0.6158	28.26		0.6142	19		0.6142	15.86		0.61424	6.18
0.6166	28.25		0.615	18.97		0.615	15.86		0.61504	6.18
0.6174	28.24		0.6158	18.94		0.6158	15.86		0.61584	6.18
0.6182	28.23		0.6166	18.91		0.6166	15.85		0.61663	6.18
0.619	28.19		0.6174	18.89		0.6174	15.83		0.61743	6.18
0.6198	28.1		0.6182	18.87		0.6182	15.81		0.61823	6.18
0.6206	28.01		0.619	18.86		0.619	15.79		0.61902	6.19
0.6214	27.89		0.6198	18.84		0.6198	15.77		0.61982	6.2
0.6222	27.77		0.6206	18.82		0.6206	15.75		0.62062	6.2
0.623	27.62		0.6214	18.8		0.6214	15.73		0.62141	6.2
0.6238	27.44		0.6222	18.78		0.6222	15.71		0.62221	6.2
0.6246	27.26		0.623	18.76		0.623	15.69		0.62301	6.19
0.6254	27.11		0.6238	18.74		0.6238	15.66		0.6238	6.18
0.6262	26.99		0.6246	18.72		0.6246	15.63		0.6246	6.18
0.627	26.9		0.6254	18.69		0.6254	15.6		0.6254	6.18
0.6278	26.8		0.6262	18.66		0.6262	15.57		0.6262	6.18
0.6286	26.67		0.627	18.64		0.627	15.54		0.62699	6.18
0.6294	26.49		0.6278	18.6		0.6278	15.52		0.62779	6.18
0.6302	26.36		0.6286	18.56		0.6286	15.5		0.62859	6.18
0.631	26.25		0.6294	18.53		0.6294	15.49		0.62938	6.19
0.6318	26.12		0.6302	18.52		0.6302	15.47		0.63018	6.2
0.6326	26.03		0.631	18.5		0.631	15.45		0.63098	6.2
0.6334	25.99		0.6318	18.48		0.6318	15.44		0.63177	6.2
0.6342	25.94		0.6326	18.44		0.6326	15.43		0.63257	6.2
0.635	25.84		0.6334	18.41		0.6334	15.42		0.63337	6.2
0.6358	25.73		0.6342	18.39		0.6342	15.4		0.63416	6.2
0.6366	25.58		0.635	18.37		0.635	15.38		0.63496	6.2
0.6374	25.42		0.6358	18.33		0.6358	15.36		0.63576	6.2
0.6382	25.26		0.6366	18.31		0.6366	15.34		0.63655	6.19
0.639	25.1		0.6373	18.3		0.6373	15.32		0.63735	6.18
0.6398	24.99		0.6381	18.29		0.6381	15.3		0.63815	6.17
0.6406	24.91		0.6389	18.28		0.6389	15.3		0.63894	6.17
0.6414	24.81		0.6397	18.28		0.6397	15.29		0.63974	6.17
0.6422	24.74		0.6405	18.28		0.6405	15.28		0.64054	6.17
0.643	24.68		0.6413	18.28		0.6413	15.26		0.64133	6.17
0.6438	24.62		0.6421	18.29		0.6421	15.24		0.64213	6.17
0.6446	24.52		0.6429	18.3		0.6429	15.23		0.64293	6.17
0.6454	24.4		0.6437	18.32		0.6437	15.23		0.64372	6.17
0.6462	24.26		0.6445	18.34		0.6445	15.24		0.64452	6.17
0.647	24.12		0.6453	18.37		0.6453	15.24		0.64532	6.17
0.6478	23.99		0.6461	18.4		0.6461	15.25		0.64611	6.17
0.6486	23.91		0.6469	18.43		0.6469	15.26		0.64691	6.17
0.6494	23.85		0.6477	18.46		0.6477	15.26		0.64771	6.18
0.6502	23.79		0.6485	18.49		0.6485	15.27		0.6485	6.18
0.651	23.7		0.6493	18.52		0.6493	15.28		0.6493	6.18
0.6518	23.63		0.6501	18.55		0.6501	15.29		0.6501	6.18
0.6526	23.54		0.6509	18.59		0.6509	15.3		0.65089	6.18
0.6534	23.4		0.6517	18.63		0.6517	15.3		0.65169	6.18
0.6542	23.25		0.6525	18.66		0.6525	15.3		0.65249	6.17
0.655	23.1		0.6533	18.69		0.6533	15.3		0.65328	6.16
0.6558	22.94		0.6541	18.72		0.6541	15.3		0.65408	6.15
0.6565	22.75		0.6549	18.75		0.6549	15.3		0.65488	6.14
0.6573	22.54		0.6557	18.75		0.6557	15.3		0.65567	6.13
0.6581	22.32		0.6565	18.76		0.6565	15.29		0.65647	6.13
0.6589	22.12		0.6573	18.77		0.6573	15.28		0.65727	6.13
0.6597	21.93		0.6581	18.79		0.6581	15.27		0.65806	6.13
0.6605	21.77		0.6589	18.81		0.6589	15.25		0.65886	6.13
0.6613	21.62		0.6597	18.82		0.6597	15.23		0.65966	6.14
0.6621	21.5		0.6605	18.83		0.6605	15.21		0.66045	6.14
0.6629	21.38		0.6612	18.84		0.6612	15.19		0.66125	6.14
0.6637	21.26		0.662	18.85		0.662	15.17		0.66205	6.14
0.6645	21.15		0.6628	18.86		0.6628	15.15		0.66284	6.14
0.6653	21.03		0.6636	18.86		0.6636	15.12		0.66364	6.14
0.6661	20.91		0.6644	18.86		0.6644	15.09		0.66444	6.14
0.6669	20.8		0.6652	18.87		0.6652	15.06		0.66523	6.14
0.6677	20.69		0.666	18.87		0.666	15.02		0.66603	6.14
0.6685	20.59		0.6668	18.86		0.6668	14.99		0.66683	6.14
0.6693	20.47		0.6676	18.85		0.6676	14.96		0.66762	6.14
0.6701	20.35		0.6684	18.84		0.6684	14.95		0.66842	6.15
0.6709	20.23		0.6692	18.83		0.6692	14.94		0.66922	6.14
0.6717	20.12		0.67	18.81		0.67	14.93		0.67001	6.14
0.6725	20.05		0.6708	18.79		0.6708	14.92		0.67081	6.14
0.6733	20		0.6716	18.77		0.6716	14.91		0.67161	6.14
0.6741	19.96		0.6724	18.75		0.6724	14.9		0.6724	6.14
0.6749	19.94		0.6732	18.74		0.6732	14.89		0.6732	6.14
0.6757	19.9		0.674	18.73		0.674	14.88		0.674	6.13
0.6765	19.84		0.6748	18.71		0.6748	14.87		0.67479	6.12
0.6773	19.77		0.6756	18.7		0.6756	14.87		0.67559	6.11
0.6781	19.71		0.6764	18.69		0.6764	14.87		0.67639	6.11
0.6789	19.65		0.6772	18.69		0.6772	14.87		0.67718	6.11
0.6797	19.58		0.678	18.69		0.678	14.86		0.67798	6.11
0.6805	19.53		0.6788	18.69		0.6788	14.85		0.67878	6.11
0.6813	19.52		0.6796	18.69		0.6796	14.84		0.67957	6.1
0.6821	19.51		0.6804	18.7		0.6804	14.83		0.68037	6.09
0.6829	19.53		0.6812	18.72		0.6812	14.83		0.68117	6.09
0.6837	19.53		0.682	18.74		0.682	14.83		0.68196	6.09
0.6845	19.51		0.6828	18.76		0.6828	14.83		0.68276	6.09
0.6853	19.47		0.6836	18.78		0.6836	14.83		0.68356	6.09
0.6861	19.4		0.6844	18.79		0.6844	14.83		0.68435	6.09
0.6869	19.34		0.6851	18.8		0.6851	14.84		0.68515	6.1
0.6877	19.29		0.6859	18.81		0.6859	14.85		0.68595	6.11
0.6885	19.28		0.6867	18.82		0.6867	14.85		0.68674	6.13
0.6893	19.27		0.6875	18.82		0.6875	14.86		0.68754	6.15
0.6901	19.25		0.6883	18.82		0.6883	14.87		0.68834	6.18
0.6909	19.25		0.6891	18.82		0.6891	14.88		0.68913	6.21
0.6917	19.26		0.6899	18.82		0.6899	14.9		0.68993	6.24
0.6925	19.26		0.6907	18.81		0.6907	14.92		0.69073	6.27
0.6933	19.25		0.6915	18.8		0.6915	14.94		0.69152	6.29
0.6941	19.25		0.6923	18.79		0.6923	14.95		0.69232	6.31
0.6949	19.28		0.6931	18.78		0.6931	14.97		0.69312	6.33
0.6957	19.27		0.6939	18.77		0.6939	14.98		0.69391	6.35
0.6965	19.25		0.6947	18.75		0.6947	14.98		0.69471	6.37
0.6973	19.22		0.6955	18.74		0.6955	14.98		0.69551	6.4
0.6981	19.18		0.6963	18.72		0.6963	14.98		0.6963	6.44
0.6989	19.15		0.6971	18.7		0.6971	14.99		0.6971	6.48
0.6997	19.14		0.6979	18.67		0.6979	14.99		0.6979	6.52
0.7005	19.13		0.6987	18.64		0.6987	15		0.69869	6.55
0.7013	19.12		0.6995	18.63		0.6995	15.01		0.69949	6.58
0.7021	19.08		0.7003	18.61		0.7003	15.01		0.70029	6.61
0.7029	19.07		0.7011	18.59		0.7011	15		0.70108	6.64
0.7037	19.06		0.7019	18.57		0.7019	15		0.70188	6.68
0.7045	19.05		0.7027	18.56		0.7027	15		0.70268	6.75
0.7053	19.04		0.7035	18.55		0.7035	15.01		0.70347	6.86
0.7061	19.03		0.7043	18.54		0.7043	15.02		0.70427	7.01
0.7069	19.03		0.7051	18.52		0.7051	15.03		0.70507	7.2
0.7077	19.02		0.7059	18.49		0.7059	15.03		0.70586	7.38
0.7085	19.01		0.7067	18.45		0.7067	15.03		0.70666	7.53
0.7093	19.01		0.7075	18.42		0.7075	15.03		0.70746	7.67
0.7101	18.99		0.7083	18.38		0.7083	15.03		0.70825	7.8
0.7109	18.99		0.7091	18.34		0.7091	15.03		0.70905	7.93
0.7117	19.06		0.7098	18.29		0.7098	15.04		0.70985	8.05
0.7125	19.17		0.7106	18.24		0.7106	15.06		0.71064	8.18
0.7133	19.26		0.7114	18.19		0.7114	15.08		0.71144	8.33
0.7141	19.28		0.7122	18.16		0.7122	15.1		0.71224	8.5
0.7149	19.26		0.713	18.13		0.713	15.12		0.71303	8.7
0.7157	19.25		0.7138	18.1		0.7138	15.14		0.71383	8.92
0.7165	19.3		0.7146	18.08		0.7146	15.16		0.71463	9.14
0.7173	19.36		0.7154	18.07		0.7154	15.18		0.71542	9.36
0.7181	19.4		0.7162	18.07		0.7162	15.2		0.71622	9.59
0.7188	19.46		0.717	18.07		0.717	15.22		0.71702	9.83
0.7196	19.52		0.7178	18.08		0.7178	15.23		0.71781	10.09
0.7204	19.58		0.7186	18.1		0.7186	15.23		0.71861	10.35
0.7212	19.67		0.7194	18.12		0.7194	15.23		0.71941	10.62
0.722	19.76		0.7202	18.13		0.7202	15.23		0.7202	10.89
0.7228	19.83		0.721	18.14		0.721	15.23		0.721	11.16
0.7236	19.9		0.7218	18.14		0.7218	15.22		0.7218	11.43
0.7244	19.98		0.7226	18.14		0.7226	15.21		0.72259	11.68
0.7252	20.03		0.7234	18.13		0.7234	15.19		0.72339	11.92
0.726	20.07		0.7242	18.12		0.7242	15.17		0.72419	12.17
0.7268	20.08		0.725	18.1		0.725	15.16		0.72498	12.44
0.7276	20.1		0.7258	18.08		0.7258	15.14		0.72578	12.72
0.7284	20.09		0.7266	18.06		0.7266	15.12		0.72658	12.99
0.7292	20.04		0.7274	18.04		0.7274	15.1		0.72737	13.25
0.73	19.99		0.7282	18.02		0.7282	15.09		0.72817	13.54
0.7308	19.96		0.729	18.01		0.729	15.08		0.72897	13.84
0.7316	19.92		0.7298	18		0.7298	15.07		0.72976	14.14
0.7324	19.89		0.7306	17.97		0.7306	15.06		0.73056	14.44
0.7332	19.87		0.7314	17.94		0.7314	15.06		0.73136	14.76
0.734	19.85		0.7322	17.92		0.7322	15.06		0.73215	15.08
0.7348	19.83		0.733	17.9		0.733	15.06		0.73295	15.39
0.7356	19.81		0.7337	17.88		0.7337	15.06		0.73375	15.67
0.7364	19.78		0.7345	17.86		0.7345	15.06		0.73454	15.9
0.7372	19.76		0.7353	17.85		0.7353	15.06		0.73534	16.09
0.738	19.76		0.7361	17.84		0.7361	15.06		0.73614	16.23
0.7388	19.75		0.7369	17.83		0.7369	15.07		0.73693	16.35
0.7396	19.77		0.7377	17.81		0.7377	15.08		0.73773	16.45
0.7404	19.8		0.7385	17.78		0.7385	15.1		0.73853	16.55
0.7412	19.83		0.7393	17.74		0.7393	15.12		0.73932	16.65
0.742	19.8		0.7401	17.7		0.7401	15.14		0.74012	16.78
0.7428	19.78		0.7409	17.66		0.7409	15.16		0.74092	16.92
0.7436	19.77		0.7417	17.62		0.7417	15.17		0.74171	17.08
0.7444	19.73		0.7425	17.58		0.7425	15.18		0.74251	17.26
0.7452	19.71		0.7433	17.54		0.7433	15.19		0.74331	17.47
0.746	19.7		0.7441	17.5		0.7441	15.2		0.7441	17.69
0.7468	19.69		0.7449	17.46		0.7449	15.21		0.7449	17.92
0.7476	19.7		0.7457	17.43		0.7457	15.22		0.7457	18.18
0.7484	19.7		0.7465	17.41		0.7465	15.23		0.74649	18.47
0.7492	19.71		0.7473	17.4		0.7473	15.23		0.74729	18.78
0.75	19.71		0.7481	17.39		0.7481	15.22		0.74809	19.11
0.7508	19.77		0.7489	17.38		0.7489	15.21		0.74888	19.46
0.7516	19.86		0.7497	17.38		0.7497	15.2		0.74968	19.83
0.7524	19.93		0.7505	17.38		0.7505	15.19		0.75048	20.23
0.7532	20.04		0.7513	17.38		0.7513	15.18		0.75127	20.65
0.754	20.12		0.7521	17.38		0.7521	15.17		0.75207	21.09
0.7548	20.17		0.7529	17.37		0.7529	15.16		0.75287	21.53
0.7556	20.22		0.7537	17.37		0.7537	15.16		0.75366	21.99
0.7564	20.24		0.7545	17.37		0.7545	15.16		0.75446	22.46
0.7572	20.27		0.7553	17.36		0.7553	15.15		0.75526	22.94
0.758	20.25		0.7561	17.35		0.7561	15.14		0.75605	23.44
0.7588	20.25		0.7569	17.34		0.7569	15.13		0.75685	23.92
0.7596	20.26		0.7576	17.33		0.7576	15.14		0.75765	24.38
0.7604	20.24		0.7584	17.32		0.7584	15.15		0.75844	24.81
0.7612	20.19		0.7592	17.32		0.7592	15.16		0.75924	25.2
0.762	20.12		0.76	17.32		0.76	15.16		0.76004	25.57
0.7628	20.07		0.7608	17.31		0.7608	15.16		0.76083	25.91
0.7636	20.01		0.7616	17.31		0.7616	15.16		0.76163	26.22
0.7644	19.96		0.7624	17.31		0.7624	15.17		0.76243	26.48
0.7652	19.94		0.7632	17.31		0.7632	15.17		0.76322	26.7
0.766	19.92		0.764	17.31		0.764	15.17		0.76402	26.91
0.7668	19.89		0.7648	17.31		0.7648	15.17		0.76482	27.1
0.7676	19.84		0.7656	17.31		0.7656	15.17		0.76562	27.28
0.7684	19.77		0.7664	17.31		0.7664	15.17		0.76641	27.44
0.7692	19.71		0.7672	17.32		0.7672	15.18		0.76721	27.58
0.77	19.66		0.768	17.34		0.768	15.18		0.76801	27.72
0.7708	19.61		0.7688	17.36		0.7688	15.19		0.7688	27.87
0.7716	19.57		0.7696	17.36		0.7696	15.18		0.7696	28.03
0.7724	19.55		0.7704	17.37		0.7704	15.18		0.7704	28.2
0.7732	19.54		0.7712	17.38		0.7712	15.18		0.77119	28.35
0.774	19.48		0.772	17.4		0.772	15.19		0.77199	28.49
0.7748	19.39		0.7728	17.41		0.7728	15.19		0.77279	28.63
0.7756	19.32		0.7736	17.42		0.7736	15.19		0.77358	28.79
0.7764	19.27		0.7744	17.43		0.7744	15.2		0.77438	28.98
0.7772	19.23		0.7752	17.44		0.7752	15.21		0.77518	29.18
0.778	19.21		0.776	17.45		0.776	15.22		0.77597	29.37
0.7788	19.18		0.7768	17.45		0.7768	15.23		0.77677	29.56
0.7796	19.15		0.7776	17.45		0.7776	15.24		0.77757	29.75
0.7804	19.12		0.7784	17.45		0.7784	15.24		0.77836	29.95
0.7812	19.09		0.7792	17.43		0.7792	15.25		0.77916	30.16
0.7819	19.09		0.78	17.42		0.78	15.26		0.77996	30.38
0.7827	19.1		0.7808	17.41		0.7808	15.27		0.78075	30.61
0.7835	19.11		0.7815	17.4		0.7815	15.28		0.78155	30.86
0.7843	19.11		0.7823	17.38		0.7823	15.29		0.78235	31.11
0.7851	19.1		0.7831	17.36		0.7831	15.3		0.78314	31.34
0.7859	19.1		0.7839	17.34		0.7839	15.31		0.78394	31.52
0.7867	19.11		0.7847	17.32		0.7847	15.32		0.78474	31.66
0.7875	19.12		0.7855	17.3		0.7855	15.34		0.78553	31.79
0.7883	19.11		0.7863	17.29		0.7863	15.36		0.78633	31.91
0.7891	19.1		0.7871	17.27		0.7871	15.39		0.78713	32.02
0.7899	19.11		0.7879	17.25		0.7879	15.42		0.78792	32.13
0.7907	19.09		0.7887	17.23		0.7887	15.45		0.78872	32.23
0.7915	19		0.7895	17.21		0.7895	15.48		0.78952	32.34
0.7923	18.88		0.7903	17.19		0.7903	15.51		0.79031	32.43
0.7931	18.76		0.7911	17.17		0.7911	15.55		0.79111	32.49
0.7939	18.7		0.7919	17.13		0.7919	15.58		0.79191	32.52
0.7947	18.69		0.7927	17.1		0.7927	15.61		0.7927	32.53
0.7955	18.66		0.7935	17.07		0.7935	15.63		0.7935	32.5
0.7963	18.6		0.7943	17.05		0.7943	15.65		0.7943	32.45
0.7971	18.52		0.7951	17.02		0.7951	15.67		0.79509	32.38
0.7979	18.46		0.7959	16.98		0.7959	15.69		0.79589	32.29
0.7987	18.39		0.7967	16.95		0.7967	15.71		0.79669	32.2
0.7995	18.31		0.7975	16.92		0.7975	15.74		0.79748	32.11
0.8003	18.23		0.7983	16.88		0.7983	15.77		0.79828	32.03
0.8011	18.12		0.7991	16.84		0.7991	15.8		0.79908	31.96
0.8019	18.02		0.7999	16.82		0.7999	15.83		0.79987	31.92
0.8027	17.93		0.8007	16.81		0.8007	15.87		0.80067	31.89
0.8035	17.84		0.8015	16.8		0.8015	15.92		0.80147	31.88
0.8043	17.75		0.8023	16.79		0.8023	15.97		0.80226	31.91
0.8051	17.7		0.8031	16.79		0.8031	16.02		0.80306	31.98
0.8059	17.66		0.8039	16.79		0.8039	16.07		0.80386	32.06
0.8067	17.63		0.8047	16.79		0.8047	16.11		0.80465	32.15
0.8075	17.57		0.8054	16.79		0.8054	16.15		0.80545	32.25
0.8083	17.5		0.8062	16.8		0.8062	16.19		0.80625	32.37
0.8091	17.46		0.807	16.81		0.807	16.23		0.80704	32.49
0.8099	17.44		0.8078	16.81		0.8078	16.26		0.80784	32.59
0.8107	17.42		0.8086	16.82		0.8086	16.3		0.80864	32.66
0.8115	17.41		0.8094	16.83		0.8094	16.34		0.80943	32.73
0.8123	17.4		0.8102	16.84		0.8102	16.39		0.81023	32.79
0.8131	17.4		0.811	16.86		0.811	16.43		0.81103	32.84
0.8139	17.41		0.8118	16.87		0.8118	16.47		0.81182	32.9
0.8147	17.42		0.8126	16.88		0.8126	16.52		0.81262	32.97
0.8155	17.43		0.8134	16.9		0.8134	16.57		0.81342	33.05
0.8163	17.44		0.8142	16.92		0.8142	16.61		0.81421	33.15
0.8171	17.44		0.815	16.93		0.815	16.66		0.81501	33.26
0.8179	17.42		0.8158	16.95		0.8158	16.7		0.81581	33.4
0.8187	17.43		0.8166	16.97		0.8166	16.73		0.8166	33.55
0.8195	17.43		0.8174	16.99		0.8174	16.76		0.8174	33.72
0.8203	17.42		0.8182	17.01		0.8182	16.79		0.8182	33.88
0.8211	17.41		0.819	17.03		0.819	16.82		0.81899	34.04
0.8219	17.45		0.8198	17.05		0.8198	16.84		0.81979	34.2
0.8227	17.48		0.8206	17.07		0.8206	16.87		0.82059	34.35
0.8235	17.5		0.8214	17.09		0.8214	16.91		0.82138	34.48
0.8243	17.55		0.8222	17.11		0.8222	16.95		0.82218	34.61
0.8251	17.6		0.823	17.13		0.823	16.98		0.82298	34.74
0.8259	17.62		0.8238	17.15		0.8238	17.01		0.82377	34.88
0.8267	17.64		0.8246	17.17		0.8246	17.04		0.82457	35.04
0.8275	17.64		0.8254	17.19		0.8254	17.07		0.82537	35.17
0.8283	17.65		0.8262	17.2		0.8262	17.1		0.82616	35.28
0.8291	17.65		0.827	17.22		0.827	17.15		0.82696	35.39
0.8299	17.69		0.8278	17.24		0.8278	17.19		0.82776	35.47
0.8307	17.72		0.8286	17.25		0.8286	17.23		0.82855	35.52
0.8315	17.7		0.8293	17.26		0.8293	17.27		0.82935	35.53
0.8323	17.68		0.8301	17.27		0.8301	17.31		0.83015	35.5
0.8331	17.6		0.8309	17.28		0.8309	17.35		0.83094	35.43
0.8339	17.54		0.8317	17.28		0.8317	17.39		0.83174	35.35
0.8347	17.5		0.8325	17.29		0.8325	17.43		0.83254	35.26
0.8355	17.48		0.8333	17.29		0.8333	17.46		0.83333	35.17
0.8363	17.51		0.8341	17.28		0.8341	17.49		0.83413	35.08
0.8371	17.49		0.8349	17.28		0.8349	17.52		0.83493	35.01
0.8379	17.47		0.8357	17.28		0.8357	17.54		0.83572	34.91
0.8387	17.42		0.8365	17.28		0.8365	17.56		0.83652	34.83
0.8395	17.36		0.8373	17.29		0.8373	17.57		0.83732	34.74
0.8403	17.31		0.8381	17.3		0.8381	17.58		0.83811	34.64
0.8411	17.25		0.8389	17.3		0.8389	17.58		0.83891	34.57
0.8419	17.21		0.8397	17.31		0.8397	17.6		0.83971	34.52
0.8427	17.15		0.8405	17.32		0.8405	17.62		0.8405	34.51
0.8435	17.12		0.8413	17.32		0.8413	17.64		0.8413	34.56
0.8442	17.1		0.8421	17.31		0.8421	17.65		0.8421	34.66
0.845	17.07		0.8429	17.3		0.8429	17.67		0.84289	34.81
0.8458	17.04		0.8437	17.29		0.8437	17.69		0.84369	34.97
0.8466	17.03		0.8445	17.28		0.8445	17.72		0.84449	35.14
0.8474	17.03		0.8453	17.27		0.8453	17.74		0.84528	35.33
0.8482	17.03		0.8461	17.25		0.8461	17.76		0.84608	35.57
0.849	17.02		0.8469	17.22		0.8469	17.77		0.84688	35.86
0.8498	17		0.8477	17.19		0.8477	17.79		0.84767	36.18
0.8506	16.97		0.8485	17.16		0.8485	17.8		0.84847	36.51
0.8514	16.94		0.8493	17.15		0.8493	17.82		0.84927	36.85
0.8522	16.9		0.8501	17.14		0.8501	17.84		0.85006	37.18
0.853	16.87		0.8509	17.13		0.8509	17.86		0.85086	37.52
0.8538	16.87		0.8517	17.11		0.8517	17.87		0.85166	37.88
0.8546	16.91		0.8525	17.1		0.8525	17.88		0.85245	38.24
0.8554	16.98		0.8533	17.08		0.8533	17.89		0.85325	38.58
0.8562	17.04		0.854	17.06		0.854	17.9		0.85405	38.89
0.857	17.08		0.8548	17.04		0.8548	17.91		0.85484	39.17
0.8578	17.12		0.8556	17.02		0.8556	17.92		0.85564	39.48
0.8586	17.14		0.8564	17.01		0.8564	17.93		0.85644	39.82
0.8594	17.12		0.8572	16.99		0.8572	17.94		0.85723	40.21
0.8602	17.09		0.858	16.98		0.858	17.95		0.85803	40.62
0.861	17.05		0.8588	16.98		0.8588	17.95		0.85883	41.03
0.8618	17.02		0.8596	16.98		0.8596	17.95		0.85962	41.47
0.8626	16.98		0.8604	16.99		0.8604	17.95		0.86042	41.93
0.8634	16.94		0.8612	17		0.8612	17.95		0.86122	42.39
0.8642	16.9		0.862	17.01		0.862	17.95		0.86201	42.84
0.865	16.87		0.8628	17.02		0.8628	17.95		0.86281	43.3
0.8658	16.84		0.8636	17.03		0.8636	17.95		0.86361	43.79
0.8666	16.81		0.8644	17.05		0.8644	17.94		0.8644	44.32
0.8674	16.79		0.8652	17.07		0.8652	17.94		0.8652	44.9
0.8682	16.8		0.866	17.08		0.866	17.94		0.866	45.5
0.869	16.82		0.8668	17.1		0.8668	17.93		0.86679	46.09
0.8698	16.82		0.8676	17.13		0.8676	17.93		0.86759	46.67
0.8706	16.83		0.8684	17.16		0.8684	17.92		0.86839	47.25
0.8714	16.84		0.8692	17.19		0.8692	17.91		0.86918	47.85
0.8722	16.84		0.87	17.21		0.87	17.9		0.86998	48.46
0.873	16.84		0.8708	17.23		0.8708	17.87		0.87078	49.09
0.8738	16.86		0.8716	17.26		0.8716	17.85		0.87157	49.73
0.8746	16.89		0.8724	17.29		0.8724	17.83		0.87237	50.36
0.8754	16.95		0.8732	17.31		0.8732	17.82		0.87317	51.01
0.8762	16.99		0.874	17.33		0.874	17.81		0.87396	51.67
0.877	17.03		0.8748	17.36		0.8748	17.8		0.87476	52.33
0.8778	17.1		0.8756	17.38		0.8756	17.8		0.87556	52.97
0.8786	17.17		0.8764	17.39		0.8764	17.79		0.87635	53.58
0.8794	17.25		0.8772	17.4		0.8772	17.78		0.87715	54.15
0.8802	17.32		0.8779	17.41		0.8779	17.77		0.87795	54.71
0.881	17.38		0.8787	17.42		0.8787	17.76		0.87874	55.25
0.8818	17.42		0.8795	17.42		0.8795	17.75		0.87954	55.74
0.8826	17.47		0.8803	17.41		0.8803	17.73		0.88034	56.2
0.8834	17.52		0.8811	17.41		0.8811	17.71		0.88113	56.61
0.8842	17.58		0.8819	17.41		0.8819	17.7		0.88193	56.97
0.885	17.65		0.8827	17.4		0.8827	17.68		0.88273	57.3
0.8858	17.7		0.8835	17.39		0.8835	17.66		0.88352	57.6
0.8866	17.73		0.8843	17.38		0.8843	17.65		0.88432	57.86
0.8874	17.76		0.8851	17.38		0.8851	17.64		0.88512	58.08
0.8882	17.81		0.8859	17.37		0.8859	17.63		0.88591	58.26
0.889	17.87		0.8867	17.37		0.8867	17.62		0.88671	58.42
0.8898	17.92		0.8875	17.38		0.8875	17.61		0.88751	58.58
0.8906	17.97		0.8883	17.37		0.8883	17.59		0.8883	58.77
0.8914	18.02		0.8891	17.36		0.8891	17.57		0.8891	58.95
0.8922	18.06		0.8899	17.37		0.8899	17.54		0.8899	59.13
0.893	18.09		0.8907	17.37		0.8907	17.53		0.89069	59.31
0.8938	18.13		0.8915	17.39		0.8915	17.52		0.89149	59.47
0.8946	18.15		0.8923	17.42		0.8923	17.5		0.89229	59.64
0.8954	18.17		0.8931	17.44		0.8931	17.48		0.89308	59.82
0.8962	18.19		0.8939	17.46		0.8939	17.47		0.89388	60.01
0.897	18.19		0.8947	17.49		0.8947	17.45		0.89468	60.21
0.8978	18.22		0.8955	17.51		0.8955	17.44		0.89547	60.45
0.8986	18.22		0.8963	17.52		0.8963	17.43		0.89627	60.73
0.8994	18.2		0.8971	17.54		0.8971	17.43		0.89707	61.03
0.9002	18.17		0.8979	17.57		0.8979	17.43		0.89786	61.32
0.901	18.14		0.8987	17.6		0.8987	17.43		0.89866	61.58
0.9018	18.13		0.8995	17.62		0.8995	17.44		0.89946	61.8
0.9026	18.12		0.9003	17.64		0.9003	17.44		0.90025	62.03
0.9034	18.1		0.9011	17.66		0.9011	17.45		0.90105	62.25
0.9042	18.07		0.9018	17.68		0.9018	17.46		0.90185	62.44
0.905	18.03		0.9026	17.7		0.9026	17.48		0.90264	62.6
0.9058	18.02		0.9034	17.72		0.9034	17.5		0.90344	62.74
0.9065	18.01		0.9042	17.74		0.9042	17.52		0.90424	62.83
0.9073	17.99		0.905	17.75		0.905	17.54		0.90504	62.92
0.9081	17.97		0.9058	17.76		0.9058	17.56		0.90583	63
0.9089	17.95		0.9066	17.75		0.9066	17.57		0.90663	63.06
0.9097	17.92		0.9074	17.75		0.9074	17.59		0.90743	63.1
0.9105	17.84		0.9082	17.76		0.9082	17.6		0.90822	63.13
0.9113	17.79		0.909	17.77		0.909	17.62		0.90902	63.15
0.9121	17.77		0.9098	17.78		0.9098	17.63		0.90982	63.14
0.9129	17.77		0.9106	17.79		0.9106	17.64		0.91061	63.13
0.9137	17.78		0.9114	17.81		0.9114	17.65		0.91141	63.11
0.9145	17.84		0.9122	17.83		0.9122	17.66		0.91221	63.08
0.9153	17.91		0.913	17.84		0.913	17.67		0.913	63.03
0.9161	18		0.9138	17.86		0.9138	17.69		0.9138	62.96
0.9169	18.15		0.9146	17.88		0.9146	17.71		0.9146	62.84
0.9177	18.33		0.9154	17.9		0.9154	17.74		0.91539	62.71
0.9185	18.47		0.9162	17.93		0.9162	17.78		0.91619	62.58
0.9193	18.6		0.917	17.94		0.917	17.82		0.91699	62.49
0.9201	18.7		0.9178	17.95		0.9178	17.86		0.91778	62.47
0.9209	18.79		0.9186	17.95		0.9186	17.91		0.91858	62.49
0.9217	18.89		0.9194	17.94		0.9194	17.95		0.91938	62.52
0.9225	18.96		0.9202	17.94		0.9202	17.99		0.92017	62.55
0.9233	19.04		0.921	17.94		0.921	18.04		0.92097	62.56
0.9241	19.14		0.9218	17.96		0.9218	18.08		0.92177	62.57
0.9249	19.23		0.9226	17.98		0.9226	18.11		0.92256	62.56
0.9257	19.35		0.9234	17.99		0.9234	18.14		0.92336	62.56
0.9265	19.44		0.9242	18.01		0.9242	18.16		0.92416	62.59
0.9273	19.54		0.925	18.03		0.925	18.19		0.92495	62.64
0.9281	19.64		0.9257	18.06		0.9257	18.22		0.92575	62.68
0.9289	19.74		0.9265	18.09		0.9265	18.25		0.92655	62.72
0.9297	19.84		0.9273	18.11		0.9273	18.27		0.92734	62.75
0.9305	19.93		0.9281	18.13		0.9281	18.3		0.92814	62.8
0.9313	20		0.9289	18.14		0.9289	18.33		0.92894	62.88
0.9321	20.06		0.9297	18.15		0.9297	18.35		0.92973	63
0.9329	20.12		0.9305	18.16		0.9305	18.37		0.93053	63.15
0.9337	20.18		0.9313	18.17		0.9313	18.41		0.93133	63.29
0.9345	20.22		0.9321	18.19		0.9321	18.46		0.93212	63.4
0.9353	20.26		0.9329	18.22		0.9329	18.52		0.93292	63.5
0.9361	20.31		0.9337	18.25		0.9337	18.58		0.93372	63.64
0.9369	20.36		0.9345	18.28		0.9345	18.63		0.93451	63.82
0.9377	20.4		0.9353	18.3		0.9353	18.68		0.93531	63.98
0.9385	20.46		0.9361	18.32		0.9361	18.73		0.93611	64.1
0.9393	20.55		0.9369	18.35		0.9369	18.77		0.9369	64.16
0.9401	20.7		0.9377	18.38		0.9377	18.81		0.9377	64.19
0.9409	20.88		0.9385	18.4		0.9385	18.84		0.9385	64.21
0.9417	21.01		0.9393	18.41		0.9393	18.87		0.93929	64.19
0.9425	21.15		0.9401	18.42		0.9401	18.91		0.94009	64.12
0.9433	21.29		0.9409	18.43		0.9409	18.95		0.94089	64
0.9441	21.42		0.9417	18.44		0.9417	19		0.94168	63.84
0.9449	21.55		0.9425	18.45		0.9425	19.05		0.94248	63.64
0.9457	21.67		0.9433	18.46		0.9433	19.1		0.94328	63.44
0.9465	21.75		0.9441	18.47		0.9441	19.16		0.94407	63.24
0.9473	21.85		0.9449	18.47		0.9449	19.21		0.94487	63.02
0.9481	21.94		0.9457	18.47		0.9457	19.26		0.94567	62.8
0.9489	22.02		0.9465	18.48		0.9465	19.32		0.94646	62.59
0.9497	22.11		0.9473	18.49		0.9473	19.36		0.94726	62.37
0.9505	22.18		0.9481	18.49		0.9481	19.41		0.94806	62.13
0.9513	22.28		0.9489	18.49		0.9489	19.46		0.94885	61.82
0.9521	22.39		0.9496	18.51		0.9496	19.51		0.94965	61.44
0.9529	22.51		0.9504	18.53		0.9504	19.57		0.95045	60.99
0.9537	22.63		0.9512	18.55		0.9512	19.63		0.95124	60.52
0.9545	22.71		0.952	18.56		0.952	19.69		0.95204	60.04
0.9553	22.75		0.9528	18.57		0.9528	19.75		0.95284	59.58
0.9561	22.8		0.9536	18.58		0.9536	19.81		0.95363	59.15
0.9569	22.86		0.9544	18.58		0.9544	19.87		0.95443	58.76
0.9577	22.92		0.9552	18.59		0.9552	19.92		0.95523	58.41
0.9585	22.99		0.956	18.6		0.956	19.98		0.95602	58.1
0.9593	23.04		0.9568	18.61		0.9568	20.04		0.95682	57.83
0.9601	23.1		0.9576	18.62		0.9576	20.09		0.95762	57.58
0.9609	23.15		0.9584	18.63		0.9584	20.14		0.95841	57.36
0.9617	23.22		0.9592	18.64		0.9592	20.19		0.95921	57.17
0.9625	23.3		0.96	18.65		0.96	20.24		0.96001	56.99
0.9633	23.38		0.9608	18.66		0.9608	20.29		0.9608	56.82
0.9641	23.45		0.9616	18.67		0.9616	20.33		0.9616	56.67
0.9649	23.49		0.9624	18.67		0.9624	20.38		0.9624	56.5
0.9657	23.55		0.9632	18.67		0.9632	20.43		0.96319	56.32
0.9665	23.64		0.964	18.67		0.964	20.49		0.96399	56.13
0.9673	23.7		0.9648	18.66		0.9648	20.55		0.96479	55.95
0.9681	23.74		0.9656	18.65		0.9656	20.62		0.96558	55.79
0.9688	23.8		0.9664	18.63		0.9664	20.69		0.96638	55.65
0.9696	23.85		0.9672	18.62		0.9672	20.76		0.96718	55.49
0.9704	23.87		0.968	18.62		0.968	20.83		0.96797	55.31
0.9712	23.87		0.9688	18.61		0.9688	20.91		0.96877	55.14
0.972	23.87		0.9696	18.59		0.9696	20.99		0.96957	54.98
0.9728	23.89		0.9704	18.57		0.9704	21.06		0.97036	54.83
0.9736	23.89		0.9712	18.54		0.9712	21.13		0.97116	54.72
0.9744	23.91		0.972	18.49		0.972	21.21		0.97196	54.65
0.9752	23.94		0.9728	18.45		0.9728	21.29		0.97275	54.6
0.976	23.96		0.9736	18.4		0.9736	21.38		0.97355	54.57
0.9768	24.01		0.9743	18.35		0.9743	21.47		0.97435	54.57
0.9776	24.04		0.9751	18.3		0.9751	21.56		0.97514	54.54
0.9784	24.07		0.9759	18.26		0.9759	21.65		0.97594	54.49
0.9792	24.11		0.9767	18.21		0.9767	21.73		0.97674	54.44
0.98	24.17		0.9775	18.16		0.9775	21.8		0.97753	54.41
0.9808	24.22		0.9783	18.13		0.9783	21.87		0.97833	54.39
0.9816	24.29		0.9791	18.11		0.9791	21.94		0.97913	54.38
0.9824	24.37		0.9799	18.09		0.9799	22		0.97992	54.34
0.9832	24.46		0.9807	18.09		0.9807	22.04		0.98072	54.28
0.984	24.54		0.9815	18.08		0.9815	22.08		0.98152	54.22
0.9848	24.62		0.9823	18.06		0.9823	22.12		0.98231	54.16
0.9856	24.67		0.9831	18.04		0.9831	22.16		0.98311	54.12
0.9864	24.71		0.9839	18.02		0.9839	22.21		0.98391	54.09
0.9872	24.75		0.9847	18.01		0.9847	22.26		0.9847	54.03
0.988	24.8		0.9855	18		0.9855	22.31		0.9855	53.91
0.9888	24.84		0.9863	18.01		0.9863	22.37		0.9863	53.77
0.9896	24.87		0.9871	18		0.9871	22.43		0.98709	53.63
0.9904	24.92		0.9879	18		0.9879	22.49		0.98789	53.51
0.9912	24.97		0.9887	18		0.9887	22.54		0.98869	53.41
0.992	25.02		0.9895	18.01		0.9895	22.61		0.98948	53.34
0.9928	25.07		0.9903	18.02		0.9903	22.68		0.99028	53.29
0.9936	25.12		0.9911	18.04		0.9911	22.76		0.99108	53.24
0.9944	25.36		0.9919	18.06		0.9919	22.85		0.99187	53.19
0.9952	25.75		0.9927	18.08		0.9927	22.95		0.99267	53.11
0.996	26		0.9935	18.1		0.9935	23.05		0.99347	53.01
0.9968	25.98		0.9943	18.12		0.9943	23.15		0.99426	52.92
0.9976	25.85		0.9951	18.13		0.9951	23.26		0.99506	52.83
0.9984	25.77		0.9959	18.13		0.9959	23.36		0.99586	52.72
0.9992	25.71		0.9967	18.13		0.9967	23.46		0.99665	52.58
1	25.67		0.9975	18.14		0.9975	23.57		0.99745	52.39
1.0008	25.66		0.9982	18.14		0.9982	23.69		0.99825	52.16
1.0016	25.62		0.999	18.13		0.999	23.81		0.99904	51.91
1.0024	25.6		0.9998	18.12		0.9998	23.92		0.99984	51.64
1.0032	25.58		1.0006	18.1		1.0006	24.02		1.00064	51.38
1.004	25.56		1.0014	18.07		1.0014	24.13		1.00143	51.12
1.0048	25.51		1.0022	18.05		1.0022	24.24		1.00223	50.88
1.0056	25.43		1.003	18.05		1.003	24.36		1.00303	50.63
1.0064	25.37		1.0038	18.04		1.0038	24.48		1.00382	50.34
1.0072	25.31		1.0046	18.03		1.0046	24.61		1.00462	50
1.008	25.25		1.0054	18.03		1.0054	24.76		1.00542	49.63
1.0088	25.22		1.0062	18.02		1.0062	24.91		1.00621	49.23
1.0096	25.2		1.007	18.01		1.007	25.07		1.00701	48.82
1.0104	25.18		1.0078	18.01		1.0078	25.22		1.00781	48.39
1.0112	25.17		1.0086	18.02		1.0086	25.37		1.0086	47.92
1.012	25.15		1.0094	18.03		1.0094	25.52		1.0094	47.43
1.0128	25.12		1.0102	18.04		1.0102	25.66		1.0102	46.94
1.0136	25.08		1.011	18.05		1.011	25.78		1.01099	46.46
1.0144	25.04		1.0118	18.05		1.0118	25.89		1.01179	46.03
1.0152	24.98		1.0126	18.04		1.0126	26		1.01259	45.61
1.016	24.92		1.0134	18.03		1.0134	26.12		1.01338	45.14
1.0168	24.85		1.0142	18.03		1.0142	26.26		1.01418	44.63
1.0176	24.77		1.015	18.03		1.015	26.42		1.01498	44.11
1.0184	24.66		1.0158	18.04		1.0158	26.59		1.01577	43.61
1.0192	24.56		1.0166	18.05		1.0166	26.77		1.01657	43.13
1.02	24.44		1.0174	18.04		1.0174	26.95		1.01737	42.66
1.0208	24.29		1.0182	18.04		1.0182	27.15		1.01816	42.21
1.0216	24.19		1.019	18.05		1.019	27.35		1.01896	41.77
1.0224	24.08		1.0198	18.06		1.0198	27.54		1.01976	41.36
1.0232	23.97		1.0206	18.06		1.0206	27.72		1.02055	40.99
1.024	23.88		1.0214	18.07		1.0214	27.89		1.02135	40.64
1.0248	23.79		1.0221	18.07		1.0221	28.07		1.02215	40.3
1.0256	23.71		1.0229	18.07		1.0229	28.25		1.02294	39.94
1.0264	23.66		1.0237	18.07		1.0237	28.43		1.02374	39.56
1.0272	23.58		1.0245	18.09		1.0245	28.6		1.02454	39.25
1.028	23.5		1.0253	18.11		1.0253	28.77		1.02533	39.05
1.0288	23.44		1.0261	18.12		1.0261	28.93		1.02613	38.92
1.0296	23.38		1.0269	18.11		1.0269	29.1		1.02693	38.87
1.0304	23.35		1.0277	18.12		1.0277	29.27		1.02772	38.85
1.0312	23.32		1.0285	18.12		1.0285	29.44		1.02852	38.89
1.0319	23.3		1.0293	18.11		1.0293	29.61		1.02932	38.98
1.0327	23.25		1.0301	18.11		1.0301	29.8		1.03011	39.12
1.0335	23.19		1.0309	18.1		1.0309	30		1.03091	39.24
1.0343	23.15		1.0317	18.09		1.0317	30.21		1.03171	39.34
1.0351	23.11		1.0325	18.09		1.0325	30.44		1.0325	39.42
1.0359	23.07		1.0333	18.08		1.0333	30.68		1.0333	39.46
1.0367	23.04		1.0341	18.08		1.0341	30.92		1.0341	39.46
1.0375	22.97		1.0349	18.08		1.0349	31.16		1.03489	39.42
1.0383	22.91		1.0357	18.08		1.0357	31.41		1.03569	39.34
1.0391	22.87		1.0365	18.07		1.0365	31.66		1.03649	39.22
1.0399	22.84		1.0373	18.06		1.0373	31.93		1.03728	39.08
1.0407	22.83		1.0381	18.05		1.0381	32.21		1.03808	38.91
1.0415	22.81		1.0389	18.04		1.0389	32.5		1.03888	38.71
1.0423	22.79		1.0397	18.02		1.0397	32.8		1.03967	38.5
1.0431	22.79		1.0405	18.01		1.0405	33.12		1.04047	38.28
1.0439	22.78		1.0413	18		1.0413	33.45		1.04127	38.04
1.0447	22.77		1.0421	17.99		1.0421	33.79		1.04207	37.79
1.0455	22.75		1.0429	17.97		1.0429	34.13		1.04286	37.55
1.0463	22.73		1.0437	17.97		1.0437	34.46		1.04366	37.32
1.0471	22.71		1.0445	17.97		1.0445	34.77		1.04446	37.1
1.0479	22.68		1.0453	17.98		1.0453	35.07		1.04525	36.88
1.0487	22.62		1.046	17.99		1.046	35.38		1.04605	36.65
1.0495	22.58		1.0468	17.99		1.0468	35.69		1.04685	36.43
1.0503	22.57		1.0476	17.99		1.0476	36.01		1.04764	36.21
1.0511	22.57		1.0484	17.99		1.0484	36.31		1.04844	35.98
1.0519	22.58		1.0492	18		1.0492	36.61		1.04924	35.74
1.0527	22.56		1.05	18.01		1.05	36.92		1.05003	35.46
1.0535	22.53		1.0508	18.03		1.0508	37.22		1.05083	35.13
1.0543	22.51		1.0516	18.07		1.0516	37.52		1.05163	34.74
1.0551	22.48		1.0524	18.1		1.0524	37.82		1.05242	34.33
1.0559	22.49		1.0532	18.15		1.0532	38.13		1.05322	33.92
1.0567	22.5		1.054	18.22		1.054	38.44		1.05402	33.49
1.0575	22.48		1.0548	18.29		1.0548	38.74		1.05481	33.07
1.0583	22.46		1.0556	18.36		1.0556	39.05		1.05561	32.65
1.0591	22.42		1.0564	18.44		1.0564	39.35		1.05641	32.21
1.0599	22.36		1.0572	18.52		1.0572	39.67		1.0572	31.77
1.0607	22.32		1.058	18.58		1.058	40.01		1.058	31.33
1.0615	22.25		1.0588	18.63		1.0588	40.34		1.0588	30.9
1.0623	22.18		1.0596	18.67		1.0596	40.68		1.05959	30.49
1.0631	22.12		1.0604	18.68		1.0604	41.03		1.06039	30.12
1.0639	22.07		1.0612	18.69		1.0612	41.4		1.06119	29.76
1.0647	22.1		1.062	18.71		1.062	41.79		1.06198	29.4
1.0655	22.21		1.0628	18.73		1.0628	42.19		1.06278	29.02
1.0663	22.34		1.0636	18.74		1.0636	42.59		1.06358	28.66
1.0671	22.4		1.0644	18.74		1.0644	42.98		1.06437	28.34
1.0679	22.39		1.0652	18.74		1.0652	43.38		1.06517	28.09
1.0687	22.4		1.066	18.72		1.066	43.76		1.06597	27.86
1.0695	22.42		1.0668	18.7		1.0668	44.14		1.06676	27.66
1.0703	22.44		1.0676	18.68		1.0676	44.54		1.06756	27.47
1.0711	22.48		1.0684	18.67		1.0684	44.94		1.06836	27.29
1.0719	22.52		1.0692	18.65		1.0692	45.34		1.06915	27.13
1.0727	22.57		1.0699	18.62		1.0699	45.75		1.06995	26.97
1.0735	22.63		1.0707	18.59		1.0707	46.15		1.07075	26.81
1.0743	22.43		1.0715	18.56		1.0715	46.55		1.07154	26.66
1.0751	22.01		1.0723	18.55		1.0723	46.95		1.07234	26.57
1.0759	21.68		1.0731	18.53		1.0731	47.35		1.07314	26.54
1.0767	21.57		1.0739	18.51		1.0739	47.77		1.07393	26.54
1.0775	21.58		1.0747	18.5		1.0747	48.19		1.07473	26.56
1.0783	21.64		1.0755	18.49		1.0755	48.62		1.07553	26.61
1.0791	21.69		1.0763	18.49		1.0763	49.06		1.07632	26.7
1.0799	21.75		1.0771	18.48		1.0771	49.48		1.07712	26.85
1.0807	21.78		1.0779	18.48		1.0779	49.88		1.07792	27.02
1.0815	21.83		1.0787	18.49		1.0787	50.27		1.07871	27.21
1.0823	21.91		1.0795	18.49		1.0795	50.67		1.07951	27.39
1.0831	21.97		1.0803	18.49		1.0803	51.09		1.08031	27.57
1.0839	22		1.0811	18.49		1.0811	51.52		1.0811	27.8
1.0847	22.05		1.0819	18.48		1.0819	51.96		1.0819	28.09
1.0855	22.11		1.0827	18.47		1.0827	52.38		1.0827	28.44
1.0863	22.18		1.0835	18.45		1.0835	52.81		1.08349	28.83
1.0871	22.27		1.0843	18.43		1.0843	53.24		1.08429	29.23
1.0879	22.4		1.0851	18.4		1.0851	53.68		1.08509	29.63
1.0887	22.55		1.0859	18.38		1.0859	54.13		1.08588	30.03
1.0895	22.71		1.0867	18.36		1.0867	54.58		1.08668	30.44
1.0903	22.87		1.0875	18.33		1.0875	55.04		1.08748	30.85
1.0911	23		1.0883	18.29		1.0883	55.51		1.08827	31.26
1.0919	23.08		1.0891	18.25		1.0891	56		1.08907	31.68
1.0927	23.14		1.0899	18.21		1.0899	56.51		1.08987	32.1
1.0935	23.2		1.0907	18.18		1.0907	57.03		1.09066	32.52
1.0942	23.26		1.0915	18.14		1.0915	57.55		1.09146	32.94
1.095	23.32		1.0923	18.12		1.0923	58.05		1.09226	33.38
1.0958	23.38		1.0931	18.1		1.0931	58.55		1.09305	33.84
1.0966	23.45		1.0938	18.08		1.0938	59.05		1.09385	34.31
1.0974	23.5		1.0946	18.08		1.0946	59.55		1.09465	34.76
1.0982	23.56		1.0954	18.06		1.0954	60.05		1.09544	35.2
1.099	23.62		1.0962	18.03		1.0962	60.56		1.09624	35.63
1.0998	23.65		1.097	18.01		1.097	61.07		1.09704	36.04
1.1006	23.68		1.0978	17.99		1.0978	61.57		1.09783	36.43
1.1014	23.73		1.0986	17.97		1.0986	62.07		1.09863	36.79
1.1022	23.78		1.0994	17.94		1.0994	62.56		1.09943	37.13
1.103	23.86		1.1002	17.92		1.1002	63.06		1.10022	37.46
1.1038	23.93		1.101	17.9		1.101	63.57		1.10102	37.83
1.1046	24		1.1018	17.89		1.1018	64.1		1.10182	38.24
1.1054	24.08		1.1026	17.88		1.1026	64.64		1.10261	38.66
1.1062	24.16		1.1034	17.87		1.1034	65.18		1.10341	39.06
1.107	24.26		1.1042	17.85		1.1042	65.73		1.10421	39.38
1.1078	24.35		1.105	17.84		1.105	66.27		1.105	39.63
1.1086	24.41		1.1058	17.83		1.1058	66.81		1.1058	39.89
1.1094	24.46		1.1066	17.83		1.1066	67.35		1.1066	40.17
1.1102	24.47		1.1074	17.81		1.1074	67.87		1.10739	40.51
1.111	24.46		1.1082	17.81		1.1082	68.4		1.10819	40.86
1.1118	24.45		1.109	17.8		1.109	68.9		1.10899	41.24
1.1126	24.44		1.1098	17.79		1.1098	69.38		1.10978	41.6
1.1134	24.44		1.1106	17.79		1.1106	69.86		1.11058	41.98
1.1142	24.44		1.1114	17.78		1.1114	70.33		1.11138	42.36
1.115	24.43		1.1122	17.77		1.1122	70.78		1.11217	42.71
1.1158	24.42		1.113	17.76		1.113	71.21		1.11297	43.07
1.1166	24.44		1.1138	17.75		1.1138	71.61		1.11377	43.42
1.1174	24.48		1.1146	17.74		1.1146	71.98		1.11456	43.79
1.1182	24.52		1.1154	17.74		1.1154	72.33		1.11536	44.14
1.119	24.55		1.1162	17.74		1.1162	72.69		1.11616	44.49
1.1198	24.59		1.117	17.75		1.117	73.06		1.11695	44.79
1.1206	24.6		1.1178	17.76		1.1178	73.43		1.11775	45.03
1.1214	24.62		1.1185	17.78		1.1185	73.8		1.11855	45.24
1.1222	24.59		1.1193	17.81		1.1193	74.16		1.11934	45.45
1.123	24.55		1.1201	17.82		1.1201	74.5		1.12014	45.69
1.1238	24.49		1.1209	17.83		1.1209	74.84		1.12094	45.97
1.1246	24.46		1.1217	17.86		1.1217	75.18		1.12173	46.3
1.1254	24.4		1.1225	17.89		1.1225	75.51		1.12253	46.67
1.1262	24.34		1.1233	17.91		1.1233	75.83		1.12333	47.11
1.127	24.31		1.1241	17.93		1.1241	76.19		1.12412	47.6
1.1278	24.3		1.1249	17.94		1.1249	76.56		1.12492	48.17
1.1286	24.3		1.1257	17.95		1.1257	76.92		1.12572	48.79
1.1294	24.27		1.1265	17.96		1.1265	77.29		1.12651	49.41
1.1302	24.25		1.1273	17.97		1.1273	77.66		1.12731	50.04
1.131	24.24		1.1281	18		1.1281	78.06		1.12811	50.69
1.1318	24.22		1.1289	18.01		1.1289	78.47		1.1289	51.36
1.1326	24.2		1.1297	18.02		1.1297	78.88		1.1297	52.05
1.1334	24.19		1.1305	18.03		1.1305	79.3		1.1305	52.75
1.1342	24.17		1.1313	18.02		1.1313	79.73		1.13129	53.49
1.135	24.16		1.1321	18.02		1.1321	80.14		1.13209	54.27
1.1358	24.12		1.1329	18.02		1.1329	80.53		1.13289	55.1
1.1366	24.07		1.1337	18		1.1337	80.91		1.13368	55.98
1.1374	24.08		1.1345	17.97		1.1345	81.3		1.13448	56.88
1.1382	24.09		1.1353	17.93		1.1353	81.69		1.13528	57.78
1.139	24.09		1.1361	17.87		1.1361	82.1		1.13607	58.66
1.1398	24.1		1.1369	17.82		1.1369	82.54		1.13687	59.53
1.1406	24.08		1.1377	17.77		1.1377	82.97		1.13767	60.41
1.1414	24.04		1.1385	17.72		1.1385	83.41		1.13846	61.31
1.1422	24.01		1.1393	17.7		1.1393	83.85		1.13926	62.27
1.143	23.97		1.1401	17.7		1.1401	84.28		1.14006	63.22
1.1438	23.93		1.1409	17.72		1.1409	84.69		1.14085	64.16
1.1446	23.82		1.1417	17.76		1.1417	85.07		1.14165	65.08
1.1454	23.66		1.1424	17.81		1.1424	85.43		1.14245	65.98
1.1462	23.47		1.1432	17.87		1.1432	85.77		1.14324	66.84
1.147	23.37		1.144	17.94		1.144	86.13		1.14404	67.66
1.1478	23.32		1.1448	18		1.1448	86.48		1.14484	68.45
1.1486	23.26		1.1456	18.08		1.1456	86.86		1.14563	69.24
1.1494	23.18		1.1464	18.15		1.1464	87.25		1.14643	70.05
1.1502	23.09		1.1472	18.21		1.1472	87.64		1.14723	70.89
1.151	22.98		1.148	18.25		1.148	88.05		1.14802	71.74
1.1518	22.87		1.1488	18.3		1.1488	88.46		1.14882	72.6
1.1526	22.75		1.1496	18.37		1.1496	88.86		1.14962	73.48
1.1534	22.61		1.1504	18.42		1.1504	89.24		1.15041	74.37
1.1542	22.48		1.1512	18.46		1.1512	89.6		1.15121	75.26
1.155	22.38		1.152	18.49		1.152	89.95		1.15201	76.12
[truncated: 27,616 more rows]
