# Supplementary material for: Quantitative mapping of human hair greying and reversal in relation to life stress
Source: eLife. 2021 Jun 22;10:e67437. doi: 10.7554/eLife.67437 (PMC8219384; doi:10.7554/eLife.67437)
Supplement: Figure 2—source data 1. [file elife-67437-fig2-data1.xlsx]

## Sheet: 2A
Note: Hairs were scanned from root (0 cm) to tip, but are graphed from tip (as 0 cm) to root. Therefore, all hairs are reversed when graphed.
Distance (cm)	Intensity (A.U.)
0	160.39
0.0008	160.58
0.00159	160.72
0.00239	160.81
0.00319	160.88
0.00398	160.91
0.00478	160.93
0.00558	160.94
0.00637	160.95
0.00717	160.96
0.00797	160.96
0.00876	160.99
0.00956	160.99
0.01036	161.01
0.01115	161
0.01195	160.99
0.01275	160.97
0.01354	160.96
0.01434	160.95
0.01514	160.94
0.01593	160.92
0.01673	160.91
0.01753	160.9
0.01832	160.9
0.01912	160.91
0.01992	160.91
0.02071	160.92
0.02151	160.92
0.02231	160.92
0.0231	160.92
0.0239	160.93
0.0247	160.94
0.02549	160.96
0.02629	160.97
0.02709	160.96
0.02788	160.94
0.02868	160.9
0.02948	160.84
0.03027	160.78
0.03107	160.73
0.03187	160.67
0.03266	160.62
0.03346	160.54
0.03426	160.49
0.03505	160.42
0.03585	160.38
0.03665	160.32
0.03744	160.28
0.03824	160.27
0.03904	160.25
0.03983	160.22
0.04063	160.18
0.04143	160.14
0.04222	160.09
0.04302	160.03
0.04382	159.96
0.04461	159.88
0.04541	159.83
0.04621	159.76
0.047	159.67
0.0478	159.61
0.0486	159.56
0.04939	159.5
0.05019	159.45
0.05099	159.42
0.05178	159.38
0.05258	159.31
0.05338	159.23
0.05417	159.15
0.05497	159.08
0.05577	159
0.05656	158.91
0.05736	158.84
0.05816	158.78
0.05895	158.73
0.05975	158.67
0.06055	158.6
0.06134	158.52
0.06214	158.41
0.06294	158.3
0.06373	158.17
0.06453	158.05
0.06533	157.94
0.06612	157.83
0.06692	157.74
0.06772	157.66
0.06851	157.58
0.06931	157.51
0.07011	157.45
0.07091	157.38
0.0717	157.31
0.0725	157.24
0.0733	157.16
0.07409	157.06
0.07489	156.98
0.07569	156.93
0.07648	156.88
0.07728	156.85
0.07808	156.8
0.07887	156.74
0.07967	156.66
0.08047	156.58
0.08126	156.55
0.08206	156.54
0.08286	156.54
0.08365	156.55
0.08445	156.54
0.08525	156.51
0.08604	156.47
0.08684	156.42
0.08764	156.36
0.08843	156.3
0.08923	156.26
0.09003	156.22
0.09082	156.2
0.09162	156.18
0.09242	156.16
0.09321	156.15
0.09401	156.13
0.09481	156.12
0.0956	156.14
0.0964	156.16
0.0972	156.21
0.09799	156.24
0.09879	156.26
0.09959	156.3
0.10038	156.34
0.10118	156.39
0.10198	156.43
0.10277	156.5
0.10357	156.56
0.10437	156.64
0.10516	156.75
0.10596	156.85
0.10676	156.98
0.10755	157.12
0.10835	157.26
0.10915	157.4
0.10994	157.52
0.11074	157.6
0.11154	157.67
0.11233	157.73
0.11313	157.79
0.11393	157.82
0.11472	157.86
0.11552	157.88
0.11632	157.91
0.11711	157.94
0.11791	157.97
0.11871	158.02
0.1195	158.04
0.1203	158.05
0.1211	158.06
0.12189	158.06
0.12269	158.07
0.12349	158.09
0.12428	158.11
0.12508	158.12
0.12588	158.12
0.12667	158.13
0.12747	158.12
0.12827	158.14
0.12906	158.18
0.12986	158.23
0.13066	158.28
0.13145	158.35
0.13225	158.45
0.13305	158.59
0.13384	158.71
0.13464	158.8
0.13544	158.88
0.13623	158.92
0.13703	158.94
0.13783	158.94
0.13862	158.93
0.13942	158.94
0.14022	158.97
0.14101	159
0.14181	159.04
0.14261	159.1
0.1434	159.19
0.1442	159.28
0.145	159.37
0.14579	159.47
0.14659	159.53
0.14739	159.58
0.14818	159.62
0.14898	159.66
0.14978	159.7
0.15057	159.75
0.15137	159.81
0.15217	159.86
0.15296	159.91
0.15376	159.96
0.15456	160.01
0.15535	160.01
0.15615	159.99
0.15695	159.96
0.15774	159.95
0.15854	159.94
0.15934	159.95
0.16013	159.98
0.16093	160.02
0.16173	160.05
0.16252	160.04
0.16332	160.03
0.16412	160.03
0.16491	160.03
0.16571	160.02
0.16651	160.01
0.1673	159.99
0.1681	159.94
0.1689	159.87
0.16969	159.77
0.17049	159.64
0.17129	159.5
0.17208	159.35
0.17288	159.2
0.17368	159.06
0.17447	158.91
0.17527	158.73
0.17607	158.56
0.17686	158.37
0.17766	158.19
0.17846	158.01
0.17925	157.84
0.18005	157.67
0.18085	157.5
0.18164	157.33
0.18244	157.12
0.18324	156.91
0.18403	156.69
0.18483	156.44
0.18563	156.19
0.18642	155.96
0.18722	155.74
0.18802	155.55
0.18881	155.38
0.18961	155.22
0.19041	155.1
0.1912	155
0.192	154.9
0.1928	154.85
0.19359	154.82
0.19439	154.79
0.19519	154.79
0.19598	154.8
0.19678	154.82
0.19758	154.83
0.19837	154.82
0.19917	154.82
0.19997	154.81
0.20076	154.81
0.20156	154.79
0.20236	154.77
0.20315	154.74
0.20395	154.7
0.20475	154.65
0.20554	154.62
0.20634	154.58
0.20714	154.58
0.20793	154.54
0.20873	154.48
0.20953	154.41
0.21033	154.32
0.21112	154.23
0.21192	154.11
0.21272	153.96
0.21351	153.85
0.21431	153.75
0.21511	153.66
0.2159	153.61
0.2167	153.6
0.2175	153.57
0.21829	153.56
0.21909	153.52
0.21989	153.47
0.22068	153.43
0.22148	153.38
0.22228	153.32
0.22307	153.24
0.22387	153.15
0.22467	153.06
0.22546	152.95
0.22626	152.86
0.22706	152.77
0.22785	152.68
0.22865	152.59
0.22945	152.5
0.23024	152.4
0.23104	152.3
0.23184	152.22
0.23263	152.14
0.23343	152.08
0.23423	152.02
0.23502	151.97
0.23582	151.94
0.23662	151.91
0.23741	151.88
0.23821	151.87
0.23901	151.84
0.2398	151.77
0.2406	151.65
0.2414	151.52
0.24219	151.4
0.24299	151.26
0.24379	151.12
0.24458	151
0.24538	150.9
0.24618	150.81
0.24697	150.73
0.24777	150.65
0.24857	150.58
0.24936	150.53
0.25016	150.5
0.25096	150.49
0.25175	150.5
0.25255	150.51
0.25335	150.51
0.25414	150.51
0.25494	150.51
0.25574	150.49
0.25653	150.46
0.25733	150.46
0.25813	150.46
0.25892	150.47
0.25972	150.48
0.26052	150.48
0.26131	150.48
0.26211	150.49
0.26291	150.48
0.2637	150.47
0.2645	150.49
0.2653	150.5
0.26609	150.48
0.26689	150.43
0.26769	150.34
0.26848	150.24
0.26928	150.12
0.27008	150.01
0.27087	149.91
0.27167	149.82
0.27247	149.71
0.27326	149.6
0.27406	149.47
0.27486	149.35
0.27565	149.23
0.27645	149.11
0.27725	149
0.27804	148.88
0.27884	148.78
0.27964	148.7
0.28043	148.62
0.28123	148.55
0.28203	148.49
0.28282	148.4
0.28362	148.33
0.28442	148.27
0.28521	148.22
0.28601	148.21
0.28681	148.19
0.2876	148.17
0.2884	148.17
0.2892	148.15
0.28999	148.13
0.29079	148.1
0.29159	148.09
0.29238	148.07
0.29318	148.02
0.29398	147.98
0.29477	147.95
0.29557	147.9
0.29637	147.86
0.29716	147.85
0.29796	147.82
0.29876	147.8
0.29955	147.79
0.30035	147.76
0.30115	147.75
0.30194	147.74
0.30274	147.71
0.30354	147.66
0.30433	147.61
0.30513	147.59
0.30593	147.56
0.30672	147.56
0.30752	147.59
0.30832	147.63
0.30911	147.68
0.30991	147.72
0.31071	147.73
0.3115	147.73
0.3123	147.74
0.3131	147.74
0.31389	147.73
0.31469	147.75
0.31549	147.76
0.31628	147.77
0.31708	147.78
0.31788	147.76
0.31867	147.73
0.31947	147.71
0.32027	147.7
0.32106	147.69
0.32186	147.71
0.32266	147.74
0.32345	147.78
0.32425	147.84
0.32505	147.89
0.32584	147.93
0.32664	147.95
0.32744	147.98
0.32823	148
0.32903	148.02
0.32983	148.03
0.33062	148.03
0.33142	148.01
0.33222	147.98
0.33301	147.96
0.33381	147.94
0.33461	147.94
0.3354	147.96
0.3362	147.98
0.337	147.98
0.33779	147.97
0.33859	147.94
0.33939	147.91
0.34018	147.88
0.34098	147.86
0.34178	147.86
0.34257	147.88
0.34337	147.91
0.34417	147.92
0.34496	147.95
0.34576	147.99
0.34656	148.03
0.34736	148.08
0.34815	148.11
0.34895	148.16
0.34975	148.18
0.35054	148.18
0.35134	148.15
0.35214	148.11
0.35293	148.06
0.35373	148.02
0.35453	147.97
0.35532	147.91
0.35612	147.85
0.35692	147.78
0.35771	147.72
0.35851	147.66
0.35931	147.59
0.3601	147.53
0.3609	147.48
0.3617	147.41
0.36249	147.36
0.36329	147.29
0.36409	147.22
0.36488	147.15
0.36568	147.08
0.36648	147.03
0.36727	147
0.36807	146.97
0.36887	146.94
0.36966	146.93
0.37046	146.93
0.37126	146.94
0.37205	146.97
0.37285	147
0.37365	147.01
0.37444	147.01
0.37524	147.01
0.37604	147.01
0.37683	147
0.37763	147
0.37843	146.98
0.37922	146.94
0.38002	146.87
0.38082	146.76
0.38161	146.65
0.38241	146.55
0.38321	146.48
0.384	146.4
0.3848	146.33
0.3856	146.26
0.38639	146.18
0.38719	146.1
0.38799	146.03
0.38878	145.94
0.38958	145.88
0.39038	145.84
0.39117	145.8
0.39197	145.75
0.39277	145.68
0.39356	145.61
0.39436	145.51
0.39516	145.42
0.39595	145.34
0.39675	145.27
0.39755	145.23
0.39834	145.2
0.39914	145.17
0.39994	145.17
0.40073	145.18
0.40153	145.17
0.40233	145.18
0.40312	145.16
0.40392	145.1
0.40472	145.05
0.40551	145.02
0.40631	145.02
0.40711	145.02
0.4079	145.04
0.4087	145.06
0.4095	145.09
0.41029	145.12
0.41109	145.17
0.41189	145.21
0.41268	145.26
0.41348	145.33
0.41428	145.41
0.41507	145.48
0.41587	145.56
0.41667	145.63
0.41746	145.7
0.41826	145.77
0.41906	145.83
0.41985	145.89
0.42065	145.97
0.42145	146.05
0.42224	146.13
0.42304	146.2
0.42384	146.26
0.42463	146.28
0.42543	146.28
0.42623	146.28
0.42702	146.32
0.42782	146.39
0.42862	146.47
0.42941	146.56
0.43021	146.63
0.43101	146.7
0.4318	146.76
0.4326	146.8
0.4334	146.84
0.43419	146.87
0.43499	146.89
0.43579	146.91
0.43658	146.92
0.43738	146.92
0.43818	146.91
0.43897	146.91
0.43977	146.89
0.44057	146.88
0.44136	146.88
0.44216	146.9
0.44296	146.94
0.44375	147
0.44455	147.05
0.44535	147.08
0.44614	147.09
0.44694	147.09
0.44774	147.09
0.44853	147.1
0.44933	147.1
0.45013	147.11
0.45092	147.11
0.45172	147.12
0.45252	147.14
0.45331	147.18
0.45411	147.2
0.45491	147.22
0.4557	147.22
0.4565	147.21
0.4573	147.22
0.45809	147.25
0.45889	147.29
0.45969	147.37
0.46048	147.47
0.46128	147.57
0.46208	147.66
0.46287	147.74
0.46367	147.81
0.46447	147.86
0.46526	147.93
0.46606	148
0.46686	148.04
0.46765	148.06
0.46845	148.1
0.46925	148.14
0.47004	148.17
0.47084	148.19
0.47164	148.22
0.47243	148.27
0.47323	148.32
0.47403	148.37
0.47482	148.41
0.47562	148.45
0.47642	148.5
0.47721	148.54
0.47801	148.57
0.47881	148.6
0.4796	148.6
0.4804	148.59
0.4812	148.6
0.48199	148.59
0.48279	148.59
0.48359	148.59
0.48438	148.57
0.48518	148.55
0.48598	148.52
0.48678	148.5
0.48757	148.48
0.48837	148.46
0.48917	148.41
0.48996	148.36
0.49076	148.31
0.49156	148.29
0.49235	148.27
0.49315	148.22
0.49395	148.17
0.49474	148.12
0.49554	148.07
0.49634	148.01
0.49713	147.95
0.49793	147.89
0.49873	147.85
0.49952	147.82
0.50032	147.77
0.50112	147.71
0.50191	147.65
0.50271	147.6
0.50351	147.54
0.5043	147.5
0.5051	147.45
0.5059	147.43
0.50669	147.4
0.50749	147.37
0.50829	147.34
0.50908	147.3
0.50988	147.26
0.51068	147.21
0.51147	147.15
0.51227	147.1
0.51307	147.06
0.51386	147.04
0.51466	147.04
0.51546	147.03
0.51625	147.04
0.51705	147.07
0.51785	147.1
0.51864	147.13
0.51944	147.16
0.52024	147.17
0.52103	147.17
0.52183	147.16
0.52263	147.15
0.52342	147.13
0.52422	147.11
0.52502	147.1
0.52581	147.07
0.52661	147.05
0.52741	147.02
0.5282	147.01
0.529	147
0.5298	146.98
0.53059	146.96
0.53139	146.94
0.53219	146.9
0.53298	146.86
0.53378	146.85
0.53458	146.84
0.53537	146.84
0.53617	146.85
0.53697	146.82
0.53776	146.8
0.53856	146.8
0.53936	146.8
0.54015	146.81
0.54095	146.83
0.54175	146.87
0.54254	146.9
0.54334	146.94
0.54414	146.98
0.54493	147.02
0.54573	147.05
0.54653	147.09
0.54732	147.14
0.54812	147.17
0.54892	147.18
0.54971	147.22
0.55051	147.25
0.55131	147.26
0.5521	147.28
0.5529	147.28
0.5537	147.29
0.55449	147.31
0.55529	147.32
0.55609	147.32
0.55688	147.31
0.55768	147.31
0.55848	147.34
0.55927	147.39
0.56007	147.47
0.56087	147.53
0.56166	147.57
0.56246	147.59
0.56326	147.62
0.56405	147.64
0.56485	147.64
0.56565	147.66
0.56644	147.68
0.56724	147.71
0.56804	147.74
0.56883	147.8
0.56963	147.85
0.57043	147.9
0.57122	147.91
0.57202	147.9
0.57282	147.89
0.57361	147.86
0.57441	147.83
0.57521	147.82
0.576	147.83
0.5768	147.86
0.5776	147.91
0.57839	147.95
0.57919	148
0.57999	148.06
0.58078	148.12
0.58158	148.17
0.58238	148.2
0.58317	148.26
0.58397	148.33
0.58477	148.43
0.58556	148.51
0.58636	148.56
0.58716	148.61
0.58795	148.65
0.58875	148.69
0.58955	148.73
0.59034	148.79
0.59114	148.89
0.59194	149.01
0.59273	149.14
0.59353	149.25
0.59433	149.34
0.59512	149.43
0.59592	149.49
0.59672	149.52
0.59751	149.58
0.59831	149.65
0.59911	149.72
0.5999	149.79
0.6007	149.85
0.6015	149.89
0.60229	149.92
0.60309	149.96
0.60389	150.01
0.60468	150.06
0.60548	150.13
0.60628	150.18
0.60707	150.22
0.60787	150.22
0.60867	150.22
0.60946	150.23
0.61026	150.25
0.61106	150.27
0.61185	150.32
0.61265	150.36
0.61345	150.4
0.61424	150.43
0.61504	150.44
0.61584	150.45
0.61663	150.48
0.61743	150.49
0.61823	150.48
0.61902	150.47
0.61982	150.46
0.62062	150.45
0.62141	150.44
0.62221	150.45
0.62301	150.46
0.6238	150.46
0.6246	150.46
0.6254	150.46
0.6262	150.45
0.62699	150.42
0.62779	150.41
0.62859	150.4
0.62938	150.38
0.63018	150.38
0.63098	150.4
0.63177	150.41
0.63257	150.46
0.63337	150.49
0.63416	150.5
0.63496	150.51
0.63576	150.52
0.63655	150.53
0.63735	150.55
0.63815	150.55
0.63894	150.55
0.63974	150.52
0.64054	150.49
0.64133	150.49
0.64213	150.53
0.64293	150.57
0.64372	150.61
0.64452	150.65
0.64532	150.68
0.64611	150.69
0.64691	150.68
0.64771	150.67
0.6485	150.69
0.6493	150.74
0.6501	150.79
0.65089	150.86
0.65169	150.94
0.65249	151.02
0.65328	151.11
0.65408	151.19
0.65488	151.23
0.65567	151.27
0.65647	151.32
0.65727	151.34
0.65806	151.37
0.65886	151.39
0.65966	151.39
0.66045	151.38
0.66125	151.39
0.66205	151.42
0.66284	151.43
0.66364	151.43
0.66444	151.43
0.66523	151.44
0.66603	151.46
0.66683	151.48
0.66762	151.51
0.66842	151.51
0.66922	151.5
0.67001	151.47
0.67081	151.4
0.67161	151.32
0.6724	151.22
0.6732	151.13
0.674	151.04
0.67479	150.96
0.67559	150.94
0.67639	150.95
0.67718	150.95
0.67798	150.94
0.67878	150.94
0.67957	150.95
0.68037	150.99
0.68117	151.06
0.68196	151.13
0.68276	151.18
0.68356	151.2
0.68435	151.2
0.68515	151.18
0.68595	151.2
0.68674	151.23
0.68754	151.28
0.68834	151.34
0.68913	151.4
0.68993	151.45
0.69073	151.5
0.69152	151.51
0.69232	151.53
0.69312	151.52
0.69391	151.53
0.69471	151.55
0.69551	151.57
0.6963	151.6
0.6971	151.64
0.6979	151.68
0.69869	151.72
0.69949	151.74
0.70029	151.76
0.70108	151.8
0.70188	151.84
0.70268	151.89
0.70347	151.95
0.70427	152.01
0.70507	152.07
0.70586	152.14
0.70666	152.2
0.70746	152.23
0.70825	152.27
0.70905	152.3
0.70985	152.33
0.71064	152.37
0.71144	152.4
0.71224	152.43
0.71303	152.47
0.71383	152.52
0.71463	152.56
0.71542	152.62
0.71622	152.68
0.71702	152.72
0.71781	152.74
0.71861	152.74
0.71941	152.74
0.7202	152.72
0.721	152.68
0.7218	152.62
0.72259	152.55
0.72339	152.51
0.72419	152.5
0.72498	152.49
0.72578	152.5
0.72658	152.54
0.72737	152.58
0.72817	152.61
0.72897	152.61
0.72976	152.61
0.73056	152.6
0.73136	152.58
0.73215	152.56
0.73295	152.56
0.73375	152.57
0.73454	152.62
0.73534	152.66
0.73614	152.67
0.73693	152.69
0.73773	152.69
0.73853	152.68
0.73932	152.68
0.74012	152.69
0.74092	152.7
0.74171	152.72
0.74251	152.73
0.74331	152.75
0.7441	152.75
0.7449	152.74
0.7457	152.73
0.74649	152.7
0.74729	152.65
0.74809	152.65
0.74888	152.69
0.74968	152.76
0.75048	152.86
0.75127	152.96
0.75207	153.06
0.75287	153.16
0.75366	153.26
0.75446	153.33
0.75526	153.34
0.75605	153.31
0.75685	153.28
0.75765	153.27
0.75844	153.27
0.75924	153.29
0.76004	153.3
0.76083	153.29
0.76163	153.27
0.76243	153.23
0.76322	153.22
0.76402	153.23
0.76482	153.27
0.76562	153.29
0.76641	153.32
0.76721	153.36
0.76801	153.39
0.7688	153.39
0.7696	153.39
0.7704	153.38
0.77119	153.4
0.77199	153.41
0.77279	153.44
0.77358	153.45
0.77438	153.44
0.77518	153.45
0.77597	153.46
0.77677	153.48
0.77757	153.51
0.77836	153.55
0.77916	153.6
0.77996	153.66
0.78075	153.7
0.78155	153.71
0.78235	153.7
0.78314	153.67
0.78394	153.62
0.78474	153.56
0.78553	153.52
0.78633	153.5
0.78713	153.51
0.78792	153.52
0.78872	153.54
0.78952	153.55
0.79031	153.54
0.79111	153.54
0.79191	153.51
0.7927	153.48
0.7935	153.46
0.7943	153.45
0.79509	153.42
0.79589	153.4
0.79669	153.38
0.79748	153.39
0.79828	153.42
0.79908	153.46
0.79987	153.54
0.80067	153.6
0.80147	153.68
0.80226	153.77
0.80306	153.85
0.80386	153.91
0.80465	153.97
0.80545	154
0.80625	154.03
0.80704	154.07
0.80784	154.11
0.80864	154.16
0.80943	154.19
0.81023	154.23
0.81103	154.29
0.81182	154.35
0.81262	154.4
0.81342	154.42
0.81421	154.42
0.81501	154.43
0.81581	154.45
0.8166	154.48
0.8174	154.54
0.8182	154.62
0.81899	154.7
0.81979	154.77
0.82059	154.84
0.82138	154.9
0.82218	154.96
0.82298	155.01
0.82377	155.07
0.82457	155.14
0.82537	155.22
0.82616	155.32
0.82696	155.42
0.82776	155.49
0.82855	155.55
0.82935	155.59
0.83015	155.64
0.83094	155.7
0.83174	155.76
0.83254	155.79
0.83333	155.83
0.83413	155.88
0.83493	155.96
0.83572	156.07
0.83652	156.17
0.83732	156.23
0.83811	156.26
0.83891	156.26
0.83971	156.24
0.8405	156.22
0.8413	156.22
0.8421	156.22
0.84289	156.21
0.84369	156.2
0.84449	156.17
0.84528	156.14
0.84608	156.1
0.84688	156.06
0.84767	156.01
0.84847	155.97
0.84927	155.95
0.85006	155.94
0.85086	155.93
0.85166	155.9
0.85245	155.88
0.85325	155.86
0.85405	155.86
0.85484	155.84
0.85564	155.81
0.85644	155.75
0.85723	155.67
0.85803	155.57
0.85883	155.47
0.85962	155.37
0.86042	155.29
0.86122	155.24
0.86201	155.2
0.86281	155.17
0.86361	155.14
0.8644	155.12
0.8652	155.1
0.866	155.09
0.86679	155.07
0.86759	155.04
0.86839	154.99
0.86918	154.94
0.86998	154.92
0.87078	154.92
0.87157	154.94
0.87237	154.97
0.87317	154.97
0.87396	154.98
0.87476	154.99
0.87556	155
0.87635	155.03
0.87715	155.06
0.87795	155.07
0.87874	155.08
0.87954	155.06
0.88034	155.05
0.88113	155.04
0.88193	155.02
0.88273	155
0.88352	154.99
0.88432	154.97
0.88512	154.98
0.88591	154.98
0.88671	154.96
0.88751	154.94
0.8883	154.89
0.8891	154.86
0.8899	154.83
0.89069	154.81
0.89149	154.79
0.89229	154.76
0.89308	154.75
0.89388	154.73
0.89468	154.7
0.89547	154.66
0.89627	154.6
0.89707	154.49
0.89786	154.37
0.89866	154.28
0.89946	154.22
0.90025	154.16
0.90105	154.11
0.90185	154.06
0.90264	154.01
0.90344	153.96
0.90424	153.9
0.90504	153.81
0.90583	153.71
0.90663	153.62
0.90743	153.55
0.90822	153.5
0.90902	153.46
0.90982	153.41
0.91061	153.35
0.91141	153.29
0.91221	153.25
0.913	153.2
0.9138	153.15
0.9146	153.1
0.91539	153.06
0.91619	153.03
0.91699	153.02
0.91778	153.02
0.91858	153.01
0.91938	153.03
0.92017	153.05
0.92097	153.07
0.92177	153.11
0.92256	153.15
0.92336	153.18
0.92416	153.22
0.92495	153.27
0.92575	153.32
0.92655	153.37
0.92734	153.44
0.92814	153.5
0.92894	153.54
0.92973	153.56
0.93053	153.58
0.93133	153.64
0.93212	153.69
0.93292	153.75
0.93372	153.8
0.93451	153.84
0.93531	153.87
0.93611	153.91
0.9369	153.98
0.9377	154.07
0.9385	154.17
0.93929	154.25
0.94009	154.31
0.94089	154.36
0.94168	154.41
0.94248	154.47
0.94328	154.53
0.94407	154.59
0.94487	154.63
0.94567	154.66
0.94646	154.7
0.94726	154.75
0.94806	154.83
0.94885	154.93
0.94965	155.02
0.95045	155.08
0.95124	155.12
0.95204	155.13
0.95284	155.15
0.95363	155.15
0.95443	155.14
0.95523	155.11
0.95602	155.07
0.95682	155.01
0.95762	154.97
0.95841	154.95
0.95921	154.97
0.96001	154.99
0.9608	154.99
0.9616	155
0.9624	154.98
0.96319	154.95
0.96399	154.92
0.96479	154.89
0.96558	154.85
0.96638	154.84
0.96718	154.81
0.96797	154.82
0.96877	154.81
0.96957	154.79
0.97036	154.75
0.97116	154.72
0.97196	154.69
0.97275	154.66
0.97355	154.66
0.97435	154.67
0.97514	154.68
0.97594	154.68
0.97674	154.7
0.97753	154.72
0.97833	154.68
0.97913	154.63
0.97992	154.57
0.98072	154.5
0.98152	154.46
0.98231	154.45
0.98311	154.45
0.98391	154.45
0.9847	154.47
0.9855	154.51
0.9863	154.55
0.98709	154.57
0.98789	154.58
0.98869	154.6
0.98948	154.61
0.99028	154.61
0.99108	154.58
0.99187	154.54
0.99267	154.52
0.99347	154.52
0.99426	154.51
0.99506	154.48
0.99586	154.44
0.99665	154.4
0.99745	154.38
0.99825	154.38
0.99904	154.39
0.99984	154.43
1.00064	154.47
1.00143	154.5
1.00223	154.52
1.00303	154.53
1.00382	154.53
1.00462	154.51
1.00542	154.49
1.00621	154.46
1.00701	154.42
1.00781	154.39
1.0086	154.37
1.0094	154.36
1.0102	154.33
1.01099	154.28
1.01179	154.24
1.01259	154.2
1.01338	154.18
1.01418	154.17
1.01498	154.16
1.01577	154.17
1.01657	154.15
1.01737	154.13
1.01816	154.1
1.01896	154.06
1.01976	154.02
1.02055	153.99
1.02135	153.96
1.02215	153.93
1.02294	153.93
1.02374	153.92
1.02454	153.91
1.02533	153.89
1.02613	153.86
1.02693	153.83
1.02772	153.77
1.02852	153.69
1.02932	153.63
1.03011	153.59
1.03091	153.56
1.03171	153.55
1.0325	153.55
1.0333	153.54
1.0341	153.54
1.03489	153.53
1.03569	153.52
1.03649	153.52
1.03728	153.51
1.03808	153.49
1.03888	153.44
1.03967	153.41
1.04047	153.4
1.04127	153.39
1.04207	153.39
1.04286	153.4
1.04366	153.41
1.04446	153.42
1.04525	153.43
1.04605	153.41
1.04685	153.4
1.04764	153.37
1.04844	153.37
1.04924	153.36
1.05003	153.34
1.05083	153.31
1.05163	153.27
1.05242	153.24
1.05322	153.2
1.05402	153.16
1.05481	153.14
1.05561	153.13
1.05641	153.15
1.0572	153.17
1.058	153.22
1.0588	153.28
1.05959	153.34
1.06039	153.4
1.06119	153.44
1.06198	153.46
1.06278	153.46
1.06358	153.45
1.06437	153.43
1.06517	153.38
1.06597	153.33
1.06676	153.28
1.06756	153.22
1.06836	153.16
1.06915	153.12
1.06995	153.09
1.07075	153.09
1.07154	153.08
1.07234	153.05
1.07314	153.01
1.07393	152.99
1.07473	152.99
1.07553	153.01
1.07632	153.04
1.07712	153.05
1.07792	153.05
1.07871	153.04
1.07951	153.02
1.08031	152.99
1.0811	152.97
1.0819	152.96
1.0827	152.95
1.08349	152.96
1.08429	152.99
1.08509	153.03
1.08588	153.08
1.08668	153.13
1.08748	153.2
1.08827	153.25
1.08907	153.31
1.08987	153.37
1.09066	153.43
1.09146	153.46
1.09226	153.49
1.09305	153.51
1.09385	153.53
1.09465	153.56
1.09544	153.58
1.09624	153.61
1.09704	153.63
1.09783	153.65
1.09863	153.68
1.09943	153.73
1.10022	153.77
1.10102	153.83
1.10182	153.88
1.10261	153.9
1.10341	153.91
1.10421	153.9
1.105	153.9
1.1058	153.88
1.1066	153.86
1.10739	153.86
1.10819	153.86
1.10899	153.83
1.10978	153.8
1.11058	153.77
1.11138	153.76
1.11217	153.75
1.11297	153.75
1.11377	153.74
1.11456	153.74
1.11536	153.73
1.11616	153.72
1.11695	153.69
1.11775	153.65
1.11855	153.59
1.11934	153.54
1.12014	153.47
1.12094	153.41
1.12173	153.38
1.12253	153.34
1.12333	153.3
1.12412	153.27
1.12492	153.25
1.12572	153.23
1.12651	153.19
1.12731	153.14
1.12811	153.07
1.1289	153.02
1.1297	152.96
1.1305	152.91
1.13129	152.87
1.13209	152.83
1.13289	152.79
1.13368	152.75
1.13448	152.72
1.13528	152.72
1.13607	152.69
1.13687	152.68
1.13767	152.67
1.13846	152.64
1.13926	152.62
1.14006	152.62
1.14085	152.62
1.14165	152.61
1.14245	152.61
1.14324	152.61
1.14404	152.64
1.14484	152.68
1.14563	152.72
1.14643	152.76
1.14723	152.8
1.14802	152.83
1.14882	152.83
1.14962	152.82
1.15041	152.8
1.15121	152.81
1.15201	152.82
1.1528	152.83
1.1536	152.83
1.1544	152.81
1.15519	152.78
1.15599	152.75
1.15679	152.72
1.15758	152.7
1.15838	152.69
1.15918	152.68
1.15997	152.67
1.16077	152.67
1.16157	152.66
1.16236	152.65
1.16316	152.64
1.16396	152.61
1.16475	152.56
1.16555	152.51
1.16635	152.44
1.16714	152.35
1.16794	152.26
1.16874	152.18
1.16953	152.12
1.17033	152.07
1.17113	152.03
1.17192	152
1.17272	151.96
1.17352	151.93
1.17431	151.88
1.17511	151.83
1.17591	151.8
1.1767	151.75
1.1775	151.7
1.1783	151.63
1.17909	151.53
1.17989	151.41
1.18069	151.28
1.18149	151.14
1.18228	151.03
1.18308	150.93
1.18388	150.85
1.18467	150.77
1.18547	150.73
1.18627	150.69
1.18706	150.65
1.18786	150.62
1.18866	150.6
1.18945	150.58
1.19025	150.56
1.19105	150.53
1.19184	150.5
1.19264	150.47
1.19344	150.43
1.19423	150.41
1.19503	150.39
1.19583	150.37
1.19662	150.34
1.19742	150.3
1.19822	150.28
1.19901	150.25
1.19981	150.24
1.20061	150.23
1.2014	150.21
1.2022	150.19
1.203	150.16
1.20379	150.1
1.20459	150.01
1.20539	149.9
1.20618	149.78
1.20698	149.68
1.20778	149.6
1.20857	149.53
1.20937	149.5
1.21017	149.49
1.21096	149.49
1.21176	149.5
1.21256	149.51
1.21335	149.52
1.21415	149.52
1.21495	149.49
1.21574	149.47
1.21654	149.43
1.21734	149.4
1.21813	149.38
1.21893	149.34
1.21973	149.28
1.22052	149.2
1.22132	149.13
1.22212	149.08
1.22291	149.04
1.22371	148.99
1.22451	148.93
1.2253	148.87
1.2261	148.82
1.2269	148.79
1.22769	148.77
1.22849	148.76
1.22929	148.77
1.23008	148.79
1.23088	148.79
1.23168	148.81
1.23247	148.83
1.23327	148.84
1.23407	148.86
1.23486	148.87
1.23566	148.87
1.23646	148.87
1.23725	148.88
1.23805	148.87
1.23885	148.85
1.23964	148.83
1.24044	148.78
1.24124	148.74
1.24203	148.72
1.24283	148.67
1.24363	148.62
1.24442	148.58
1.24522	148.55
1.24602	148.53
1.24681	148.53
1.24761	148.54
1.24841	148.53
1.2492	148.5
1.25	148.47
1.2508	148.46
1.25159	148.45
1.25239	148.48
1.25319	148.51
1.25398	148.57
1.25478	148.63
1.25558	148.67
1.25637	148.72
1.25717	148.75
1.25797	148.77
1.25876	148.8
1.25956	148.87
1.26036	148.93
1.26115	149.03
1.26195	149.12
1.26275	149.25
1.26354	149.39
1.26434	149.5
1.26514	149.6
1.26593	149.7
1.26673	149.8
1.26753	149.9
1.26832	149.98
1.26912	150.04
1.26992	150.09
1.27071	150.12
1.27151	150.16
1.27231	150.19
1.2731	150.24
1.2739	150.31
1.2747	150.4
1.27549	150.5
1.27629	150.62
1.27709	150.75
1.27788	150.89
1.27868	151.03
1.27948	151.16
1.28027	151.28
1.28107	151.38
1.28187	151.47
1.28266	151.56
1.28346	151.67
1.28426	151.82
1.28505	151.99
1.28585	152.17
1.28665	152.35
1.28744	152.49
1.28824	152.63
1.28904	152.74
1.28983	152.84
1.29063	152.93
1.29143	153.02
1.29222	153.09
1.29302	153.16
1.29382	153.22
1.29461	153.29
1.29541	153.36
1.29621	153.43
1.297	153.5
1.2978	153.56
1.2986	153.63
1.29939	153.71
1.30019	153.82
1.30099	153.93
1.30178	154.01
1.30258	154.09
1.30338	154.15
1.30417	154.2
1.30497	154.25
1.30577	154.29
1.30656	154.29
1.30736	154.28
1.30816	154.27
1.30895	154.24
1.30975	154.23
1.31055	154.24
1.31134	154.25
1.31214	154.27
1.31294	154.31
1.31373	154.36
1.31453	154.41
1.31533	154.48
1.31612	154.58
1.31692	154.69
1.31772	154.81
1.31851	154.93
1.31931	155.05
1.32011	155.19
1.32091	155.33
1.3217	155.45
1.3225	155.59
1.3233	155.75
1.32409	155.89
1.32489	156.04
1.32569	156.19
1.32648	156.33
1.32728	156.46
1.32808	156.6
1.32887	156.73
1.32967	156.85
1.33047	156.96
1.33126	157.06
1.33206	157.14
1.33286	157.22
1.33365	157.3
1.33445	157.38
1.33525	157.47
1.33604	157.56
1.33684	157.68
1.33764	157.84
1.33843	158.01
1.33923	158.15
1.34003	158.3
1.34082	158.43
1.34162	158.56
1.34242	158.66
1.34321	158.76
1.34401	158.89
1.34481	158.99
1.3456	159.07
1.3464	159.12
1.3472	159.16
1.34799	159.21
1.34879	159.26
1.34959	159.33
1.35038	159.41
1.35118	159.47
1.35198	159.55
1.35277	159.6
1.35357	159.62
1.35437	159.63
1.35516	159.63
1.35596	159.63
1.35676	159.63
1.35755	159.62
1.35835	159.61
1.35915	159.6
1.35994	159.6
1.36074	159.6
1.36154	159.61
1.36233	159.63
1.36313	159.64
1.36393	159.65
1.36472	159.66
1.36552	159.65
1.36632	159.62
1.36711	159.61
1.36791	159.59
1.36871	159.6
1.3695	159.62
1.3703	159.65
1.3711	159.67
1.37189	159.7
1.37269	159.72
1.37349	159.73
1.37428	159.75
1.37508	159.78
1.37588	159.81
1.37667	159.84
1.37747	159.88
1.37827	159.91
1.37906	159.92
1.37986	159.92
1.38066	159.91
1.38145	159.9
1.38225	159.89
1.38305	159.89
1.38384	159.91
1.38464	159.94
1.38544	160
1.38623	160.09
1.38703	160.19
1.38783	160.32
1.38862	160.45
1.38942	160.56
1.39022	160.67
1.39101	160.78
1.39181	160.88
1.39261	160.96
1.3934	161.04
1.3942	161.12
1.395	161.17
1.39579	161.17
1.39659	161.14
1.39739	161.12
1.39818	161.09
1.39898	161.07
1.39978	161.07
1.40057	161.05
1.40137	161.02
1.40217	160.98
1.40296	160.92
1.40376	160.9
1.40456	160.88
1.40535	160.89
1.40615	160.91
1.40695	160.95
1.40774	160.99
1.40854	161.03
1.40934	161.06
1.41013	161.07
1.41093	161.08
1.41173	161.08
1.41252	161.05
1.41332	161.02
1.41412	161
1.41491	160.96
1.41571	160.94
1.41651	160.91
1.4173	160.87
1.4181	160.84
1.4189	160.82
1.41969	160.8
1.42049	160.79
1.42129	160.77
1.42208	160.74
1.42288	160.72
1.42368	160.72
1.42447	160.74
1.42527	160.78
1.42607	160.84
1.42686	160.89
1.42766	160.9
1.42846	160.89
1.42925	160.83
1.43005	160.76
1.43085	160.71
1.43164	160.68
1.43244	160.71
1.43324	160.76
1.43403	160.81
1.43483	160.88
1.43563	160.95
1.43642	161.03
1.43722	161.11
1.43802	161.17
1.43881	161.23
1.43961	161.27
1.44041	161.32
1.4412	161.37
1.442	161.41
1.4428	161.46
1.44359	161.47
1.44439	161.48
1.44519	161.52
1.44598	161.58
1.44678	161.65
1.44758	161.72
1.44837	161.79
1.44917	161.87
1.44997	161.93
1.45076	161.99
1.45156	162.06
1.45236	162.13
1.45315	162.22
1.45395	162.31
1.45475	162.39
1.45554	162.47
1.45634	162.55
1.45714	162.61
1.45793	162.68
1.45873	162.76
1.45953	162.84
1.46033	162.92
1.46112	163.01
1.46192	163.1
1.46272	163.19
1.46351	163.29
1.46431	163.38
1.46511	163.45
1.4659	163.5
1.4667	163.54
1.4675	163.54
1.46829	163.53
1.46909	163.49
1.46989	163.44
1.47068	163.38
1.47148	163.32
1.47228	163.27
1.47307	163.23
1.47387	163.22
1.47467	163.23
1.47546	163.26
1.47626	163.32
1.47706	163.35
1.47785	163.39
1.47865	163.41
1.47945	163.41
1.48024	163.42
1.48104	163.45
1.48184	163.49
1.48263	163.55
1.48343	163.59
1.48423	163.6
1.48502	163.57
1.48582	163.53
1.48662	163.48
1.48741	163.42
1.48821	163.39
1.48901	163.37
1.4898	163.39
1.4906	163.39
1.4914	163.4
1.49219	163.42
1.49299	163.44
1.49379	163.45
1.49458	163.47
1.49538	163.47
1.49618	163.46
1.49697	163.45
1.49777	163.42
1.49857	163.39
1.49936	163.36
1.50016	163.34
1.50096	163.32
1.50175	163.31
1.50255	163.29
1.50335	163.24
1.50414	163.18
1.50494	163.11
1.50574	163.06
1.50653	163.02
1.50733	163.02
1.50813	163.04
1.50892	163.1
1.50972	163.17
1.51052	163.25
1.51131	163.31
1.51211	163.34
1.51291	163.35
1.5137	163.36
1.5145	163.34
1.5153	163.33
1.51609	163.29
1.51689	163.24
1.51769	163.21
1.51848	163.19
1.51928	163.21
1.52008	163.22
1.52087	163.26
1.52167	163.29
1.52247	163.31
1.52326	163.33
1.52406	163.35
1.52486	163.37
1.52565	163.39
1.52645	163.39
1.52725	163.39
1.52804	163.38
1.52884	163.33
1.52964	163.29
1.53043	163.25
1.53123	163.2
1.53203	163.16
1.53282	163.12
1.53362	163.08
1.53442	163.05
1.53521	163.02
1.53601	162.99
1.53681	162.98
1.5376	162.96
1.5384	162.96
1.5392	162.94
1.53999	162.92
1.54079	162.89
1.54159	162.85
1.54238	162.81
1.54318	162.76
1.54398	162.71
1.54477	162.66
1.54557	162.62
1.54637	162.58
1.54716	162.56
1.54796	162.57
1.54876	162.61
1.54955	162.66
1.55035	162.73
1.55115	162.82
1.55194	162.9
1.55274	162.96
1.55354	162.97
1.55433	162.95
1.55513	162.91
1.55593	162.86
1.55672	162.81
1.55752	162.75
1.55832	162.71
1.55911	162.67
1.55991	162.64
1.56071	162.62
1.5615	162.6
1.5623	162.57
1.5631	162.54
1.56389	162.5
1.56469	162.47
1.56549	162.45
1.56628	162.43
1.56708	162.41
1.56788	162.37
1.56867	162.33
1.56947	162.27
1.57027	162.22
1.57106	162.16
1.57186	162.11
1.57266	162.04
1.57345	161.97
1.57425	161.91
1.57505	161.87
1.57584	161.85
1.57664	161.82
1.57744	161.79
1.57823	161.75
1.57903	161.71
1.57983	161.65
1.58062	161.59
1.58142	161.53
1.58222	161.47
1.58301	161.42
1.58381	161.4
1.58461	161.39
1.5854	161.35
1.5862	161.32
1.587	161.29
1.58779	161.27
1.58859	161.27
1.58939	161.29
1.59018	161.29
1.59098	161.3
[truncated: 6,856 more rows]

## Sheet: 2B
Note: Hairs were scanned from root (0 cm) to tip, but are graphed from tip (as 0 cm) to root. Therefore, all hairs are reversed when graphed.
Distance (cm)	Intensity (A.U.)
0.0008	120.86
0.0016	121.84
0.0024	122.82
0.00319	123.77
0.00399	124.63
0.00479	125.41
0.00559	126.05
0.00639	126.56
0.00719	126.88
0.00799	127.08
0.00879	127.13
0.00958	127
0.01038	126.81
0.01118	126.58
0.01198	126.46
0.01278	126.33
0.01358	126.19
0.01438	126
0.01518	125.72
0.01597	125.6
0.01677	125.65
0.01757	125.7
0.01837	125.73
0.01917	125.65
0.01997	125.42
0.02077	125.24
0.02157	125.02
0.02236	124.83
0.02316	124.71
0.02396	124.65
0.02476	124.55
0.02556	124.52
0.02636	124.5
0.02716	124.47
0.02796	124.66
0.02875	124.87
0.02955	125.16
0.03035	125.46
0.03115	125.72
0.03195	125.98
0.03275	126.3
0.03355	126.53
0.03435	126.78
0.03514	126.93
0.03594	127.1
0.03674	127.34
0.03754	127.5
0.03834	127.77
0.03914	128.07
0.03994	128.41
0.04073	128.79
0.04153	129.11
0.04233	129.42
0.04313	129.6
0.04393	129.79
0.04473	130
0.04553	130.1
0.04633	130.31
0.04712	130.51
0.04792	130.67
0.04872	130.88
0.04952	131.02
0.05032	131.27
0.05112	131.43
0.05192	131.6
0.05272	131.8
0.05351	132.12
0.05431	132.44
0.05511	132.72
0.05591	132.95
0.05671	133.16
0.05751	133.34
0.05831	133.51
0.05911	133.74
0.0599	133.92
0.0607	134.08
0.0615	134.29
0.0623	134.46
0.0631	134.6
0.0639	134.7
0.0647	134.86
0.0655	135.02
0.06629	135.2
0.06709	135.29
0.06789	135.43
0.06869	135.52
0.06949	135.71
0.07029	135.99
0.07109	136.33
0.07188	136.58
0.07268	136.78
0.07348	136.97
0.07428	137.21
0.07508	137.45
0.07588	137.68
0.07668	137.83
0.07748	138.01
0.07827	138.25
0.07907	138.47
0.07987	138.64
0.08067	138.93
0.08147	139.2
0.08227	139.47
0.08307	139.71
0.08387	139.91
0.08466	140.01
0.08546	139.98
0.08626	139.93
0.08706	139.86
0.08786	139.83
0.08866	139.78
0.08946	139.79
0.09026	139.95
0.09105	140.09
0.09185	140.26
0.09265	140.42
0.09345	140.5
0.09425	140.65
0.09505	140.82
0.09585	140.97
0.09665	140.95
0.09744	140.75
0.09824	140.53
0.09904	140.34
0.09984	140.28
0.10064	140.32
0.10144	140.39
0.10224	140.41
0.10304	140.38
0.10383	140.28
0.10463	140.15
0.10543	140.18
0.10623	140.3
0.10703	140.42
0.10783	140.51
0.10863	140.58
0.10942	140.65
0.11022	140.73
0.11102	140.85
0.11182	140.87
0.11262	140.92
0.11342	140.85
0.11422	140.82
0.11502	140.91
0.11581	141.04
0.11661	141.18
0.11741	141.4
0.11821	141.61
0.11901	141.73
0.11981	141.72
0.12061	141.81
0.12141	141.85
0.1222	141.9
0.123	141.92
0.1238	142.01
0.1246	142.08
0.1254	142.11
0.1262	142.18
0.127	142.3
0.1278	142.33
0.12859	142.37
0.12939	142.36
0.13019	142.5
0.13099	142.56
0.13179	142.58
0.13259	142.51
0.13339	142.39
0.13419	142.21
0.13498	142.07
0.13578	141.93
0.13658	141.78
0.13738	141.68
0.13818	141.55
0.13898	141.5
0.13978	141.38
0.14058	141.35
0.14137	141.33
0.14217	141.31
0.14297	141.29
0.14377	141.31
0.14457	141.37
0.14537	141.37
0.14617	141.37
0.14696	141.32
0.14776	141.27
0.14856	141.24
0.14936	141.21
0.15016	141.14
0.15096	141.09
0.15176	140.98
0.15256	140.89
0.15335	140.76
0.15415	140.69
0.15495	140.64
0.15575	140.58
0.15655	140.46
0.15735	140.36
0.15815	140.24
0.15895	140.09
0.15974	139.96
0.16054	139.88
0.16134	139.7
0.16214	139.59
0.16294	139.42
0.16374	139.26
0.16454	139.1
0.16534	139.05
0.16613	139.08
0.16693	139.11
0.16773	139.17
0.16853	139.26
0.16933	139.42
0.17013	139.52
0.17093	139.67
0.17173	139.88
0.17252	139.99
0.17332	140.12
0.17412	140.27
0.17492	140.38
0.17572	140.48
0.17652	140.55
0.17732	140.72
0.17812	140.92
0.17891	141.05
0.17971	141.13
0.18051	141.2
0.18131	141.21
0.18211	141.17
0.18291	141.13
0.18371	141.18
0.1845	141.28
0.1853	141.36
0.1861	141.29
0.1869	141.12
0.1877	140.96
0.1885	140.86
0.1893	140.69
0.1901	140.5
0.19089	140.34
0.19169	140.27
0.19249	140.37
0.19329	140.47
0.19409	140.64
0.19489	140.9
0.19569	141.08
0.19649	141.29
0.19728	141.47
0.19808	141.51
0.19888	141.62
0.19968	141.69
0.20048	141.85
0.20128	141.85
0.20208	141.71
0.20288	141.5
0.20367	141.3
0.20447	141.11
0.20527	141.01
0.20607	140.92
0.20687	140.86
0.20767	140.76
0.20847	140.66
0.20927	140.63
0.21006	140.68
0.21086	140.62
0.21166	140.68
0.21246	140.83
0.21326	141.03
0.21406	141.24
0.21486	141.45
0.21565	141.63
0.21645	141.85
0.21725	142.09
0.21805	142.26
0.21885	142.44
0.21965	142.53
0.22045	142.66
0.22125	142.77
0.22204	142.89
0.22284	142.98
0.22364	143.07
0.22444	143.11
0.22524	143.16
0.22604	143.19
0.22684	143.22
0.22764	143.25
0.22843	143.36
0.22923	143.48
0.23003	143.62
0.23083	143.8
0.23163	143.92
0.23243	144.08
0.23323	144.22
0.23403	144.45
0.23482	144.59
0.23562	144.73
0.23642	144.86
0.23722	145.03
0.23802	145.14
0.23882	145.21
0.23962	145.36
0.24042	145.4
0.24121	145.49
0.24201	145.63
0.24281	145.75
0.24361	145.85
0.24441	145.83
0.24521	145.81
0.24601	145.79
0.24681	145.77
0.2476	145.74
0.2484	145.76
0.2492	145.73
0.25	145.66
0.2508	145.64
0.2516	145.56
0.2524	145.54
0.25319	145.54
0.25399	145.51
0.25479	145.52
0.25559	145.5
0.25639	145.49
0.25719	145.43
0.25799	145.37
0.25879	145.28
0.25958	145.27
0.26038	145.34
0.26118	145.35
0.26198	145.4
0.26278	145.53
0.26358	145.72
0.26438	145.82
0.26518	145.87
0.26597	145.88
0.26677	145.92
0.26757	145.96
0.26837	145.91
0.26917	145.89
0.26997	145.9
0.27077	145.98
0.27157	146.07
0.27236	146.06
0.27316	146.03
0.27396	145.92
0.27476	145.73
0.27556	145.45
0.27636	145.14
0.27716	144.87
0.27796	144.65
0.27875	144.41
0.27955	144.17
0.28035	143.93
0.28115	143.67
0.28195	143.49
0.28275	143.35
0.28355	143.29
0.28435	143.25
0.28514	143.22
0.28594	143.16
0.28674	143.11
0.28754	143.01
0.28834	142.97
0.28914	142.97
0.28994	142.91
0.29073	142.76
0.29153	142.59
0.29233	142.29
0.29313	142.04
0.29393	141.78
0.29473	141.59
0.29553	141.4
0.29633	141.14
0.29712	140.87
0.29792	140.57
0.29872	140.35
0.29952	140.19
0.30032	139.97
0.30112	139.66
0.30192	139.3
0.30272	138.98
0.30351	138.72
0.30431	138.53
0.30511	138.34
0.30591	138.13
0.30671	137.89
0.30751	137.64
0.30831	137.4
0.30911	137.13
0.3099	136.91
0.3107	136.63
0.3115	136.35
0.3123	136.11
0.3131	135.82
0.3139	135.51
0.3147	135.15
0.3155	134.82
0.31629	134.53
0.31709	134.31
0.31789	134.07
0.31869	133.92
0.31949	133.76
0.32029	133.56
0.32109	133.53
0.32188	133.39
0.32268	133.12
0.32348	132.8
0.32428	132.5
0.32508	132.32
0.32588	132.16
0.32668	131.95
0.32748	131.77
0.32827	131.58
0.32907	131.34
0.32987	131.12
0.33067	130.95
0.33147	130.79
0.33227	130.61
0.33307	130.41
0.33387	130.32
0.33466	130.17
0.33546	130.08
0.33626	130.02
0.33706	130.03
0.33786	130.07
0.33866	130.11
0.33946	130.12
0.34026	130.05
0.34105	129.87
0.34185	129.73
0.34265	129.51
0.34345	129.27
0.34425	128.94
0.34505	128.66
0.34585	128.35
0.34665	128
0.34744	127.59
0.34824	127.25
0.34904	126.94
0.34984	126.73
0.35064	126.66
0.35144	126.66
0.35224	126.73
0.35304	126.86
0.35383	126.95
0.35463	127.19
0.35543	127.45
0.35623	127.67
0.35703	127.88
0.35783	128.04
0.35863	128.17
0.35942	128.43
0.36022	128.67
0.36102	128.95
0.36182	129.08
0.36262	129.22
0.36342	129.43
0.36422	129.65
0.36502	129.89
0.36581	130.16
0.36661	130.37
0.36741	130.57
0.36821	130.77
0.36901	130.83
0.36981	130.93
0.37061	130.97
0.37141	131.03
0.3722	131.12
0.373	131.33
0.3738	131.53
0.3746	131.71
0.3754	131.82
0.3762	131.89
0.377	131.96
0.3778	132
0.37859	132.13
0.37939	132.27
0.38019	132.37
0.38099	132.53
0.38179	132.74
0.38259	133.02
0.38339	133.34
0.38419	133.65
0.38498	133.85
0.38578	133.97
0.38658	134.07
0.38738	134.2
0.38818	134.29
0.38898	134.36
0.38978	134.46
0.39058	134.5
0.39137	134.61
0.39217	134.82
0.39297	135.08
0.39377	135.34
0.39457	135.57
0.39537	135.83
0.39617	136.12
0.39696	136.3
0.39776	136.45
0.39856	136.56
0.39936	136.65
0.40016	136.71
0.40096	136.74
0.40176	136.71
0.40256	136.74
0.40335	136.91
0.40415	137.1
0.40495	137.31
0.40575	137.43
0.40655	137.56
0.40735	137.72
0.40815	137.84
0.40895	137.97
0.40974	138.11
0.41054	138.28
0.41134	138.42
0.41214	138.57
0.41294	138.69
0.41374	138.76
0.41454	138.76
0.41534	138.85
0.41613	138.88
0.41693	138.95
0.41773	138.93
0.41853	138.87
0.41933	138.77
0.42013	138.7
0.42093	138.72
0.42173	138.77
0.42252	138.76
0.42332	138.77
0.42412	139.12
0.42492	139.94
0.42572	140.4
0.42652	140.39
0.42732	140.46
0.42812	140.55
0.42891	140.62
0.42971	140.68
0.43051	140.49
0.43131	140.15
0.43211	139.66
0.43291	139.05
0.43371	138.5
0.4345	138.02
0.4353	137.5
0.4361	137.01
0.4369	136.57
0.4377	136.23
0.4385	135.85
0.4393	135.47
0.4401	135.06
0.44089	134.58
0.44169	134.23
0.44249	134
0.44329	133.74
0.44409	133.56
0.44489	133.36
0.44569	133.15
0.44649	132.85
0.44728	132.57
0.44808	132.26
0.44888	131.92
0.44968	131.63
0.45048	131.4
0.45128	131.21
0.45208	131.04
0.45288	130.84
0.45367	130.55
0.45447	130.18
0.45527	129.78
0.45607	129.41
0.45687	129.11
0.45767	128.89
0.45847	128.75
0.45927	128.51
0.46006	128.19
0.46086	127.79
0.46166	127.33
0.46246	126.93
0.46326	126.55
0.46406	126.12
0.46486	125.6
0.46565	125.2
0.46645	124.83
0.46725	124.46
0.46805	124.13
0.46885	124.19
0.46965	124.42
0.47045	124.47
0.47125	124.13
0.47204	123.56
0.47284	122.89
0.47364	122.15
0.47444	121.44
0.47524	120.77
0.47604	120.14
0.47684	119.5
0.47764	118.89
0.47843	118.31
0.47923	117.76
0.48003	117.22
0.48083	116.74
0.48163	116.49
0.48243	116.32
0.48323	115.95
0.48403	115.48
0.48482	114.98
0.48562	114.5
0.48642	114.04
0.48722	113.52
0.48802	113.01
0.48882	112.45
0.48962	111.92
0.49042	111.46
0.49121	111.01
0.49201	110.53
0.49281	110.03
0.49361	109.52
0.49441	108.95
0.49521	108.36
0.49601	107.75
0.49681	107.14
0.4976	106.5
0.4984	105.92
0.4992	105.38
0.5	104.95
0.5008	104.5
0.5016	104.04
0.5024	103.6
0.50319	103.17
0.50399	102.74
0.50479	102
0.50559	100.81
0.50639	99.96
0.50719	99.68
0.50799	99.39
0.50879	99.05
0.50958	98.71
0.51038	98.4
0.51118	98.18
0.51198	97.94
0.51278	97.74
0.51358	98.07
0.51438	98.63
0.51518	98.94
0.51597	98.65
0.51677	98.19
0.51757	97.73
0.51837	97.25
0.51917	96.84
0.51997	96.39
0.52077	95.91
0.52157	95.5
0.52236	95
0.52316	94.55
0.52396	94.15
0.52476	93.62
0.52556	93.11
0.52636	92.48
0.52716	91.89
0.52796	91.38
0.52875	90.95
0.52955	90.65
0.53035	90.4
0.53115	90.06
0.53195	89.75
0.53275	89.43
0.53355	89.17
0.53435	88.89
0.53514	88.59
0.53594	88.37
0.53674	88.16
0.53754	87.87
0.53834	87.61
0.53914	87.3
0.53994	87.03
0.54073	86.77
0.54153	86.56
0.54233	86.41
0.54313	86.19
0.54393	85.9
0.54473	85.61
0.54553	85.39
0.54633	85.06
0.54712	84.83
0.54792	84.54
0.54872	84.27
0.54952	83.64
0.55032	82.88
0.55112	82.3
0.55192	82.09
0.55272	82.08
0.55351	82.06
0.55431	82.08
0.55511	82.38
0.55591	82.66
0.55671	82.65
0.55751	82.65
0.55831	82.63
0.55911	82.57
0.5599	82.54
0.5607	82.5
0.5615	82.45
0.5623	82.17
0.5631	81.78
0.5639	81.63
0.5647	81.56
0.5655	81.51
0.56629	81.4
0.56709	81.27
0.56789	81.46
0.56869	81.81
0.56949	81.95
0.57029	81.97
0.57109	81.9
0.57188	81.77
0.57268	81.66
0.57348	81.55
0.57428	81.53
0.57508	81.58
0.57588	81.62
0.57668	81.68
0.57748	81.74
0.57827	81.79
0.57907	81.85
0.57987	81.9
0.58067	81.83
0.58147	81.79
0.58227	81.69
0.58307	81.56
0.58387	81.46
0.58466	81.43
0.58546	81.42
0.58626	81.47
0.58706	81.54
0.58786	81.61
0.58866	81.63
0.58946	81.72
0.59026	81.75
0.59105	81.82
0.59185	81.85
0.59265	81.84
0.59345	81.8
0.59425	81.24
0.59505	80.34
0.59585	79.68
0.59665	79.63
0.59744	79.71
0.59824	79.78
0.59904	79.79
0.59984	79.68
0.60064	79.63
0.60144	79.56
0.60224	79.51
0.60304	79.5
0.60383	79.43
0.60463	79.38
0.60543	79.4
0.60623	79.42
0.60703	79.5
0.60783	79.58
0.60863	79.59
0.60942	79.61
0.61022	79.53
0.61102	79.46
0.61182	79.34
0.61262	79.21
0.61342	79.11
0.61422	78.95
0.61502	78.87
0.61581	78.85
0.61661	78.79
0.61741	78.71
0.61821	78.72
0.61901	78.7
0.61981	78.68
0.62061	78.66
0.62141	78.68
0.6222	78.69
0.623	78.66
0.6238	78.63
0.6246	78.63
0.6254	78.55
0.6262	78.44
0.627	78.38
0.6278	78.28
0.62859	78.26
0.62939	78.25
0.63019	78.33
0.63099	78.45
0.63179	78.44
0.63259	78.38
0.63339	78.28
0.63419	78.17
0.63498	78.06
0.63578	77.68
0.63658	77.33
0.63738	77.22
0.63818	77.1
0.63898	77.03
0.63978	76.92
0.64058	76.75
0.64137	76.6
0.64217	76.45
0.64297	76.28
0.64377	76.13
0.64457	75.93
0.64537	75.79
0.64617	75.68
0.64696	75.61
0.64776	75.56
0.64856	75.17
0.64936	74.62
0.65016	74.32
0.65096	74.1
0.65176	73.85
0.65256	73.62
0.65335	73.37
0.65415	73.08
0.65495	72.69
0.65575	72.35
0.65655	72.05
0.65735	71.74
0.65815	71.47
0.65895	71.19
0.65974	70.89
0.66054	70.66
0.66134	70.39
0.66214	70.12
0.66294	69.84
0.66374	69.63
0.66454	69.38
0.66534	69.06
0.66613	68.7
0.66693	68.37
0.66773	68.01
0.66853	67.59
0.66933	67.17
0.67013	66.73
0.67093	66.29
0.67173	65.77
0.67252	65.36
0.67332	64.97
0.67412	64.59
0.67492	64.27
0.67572	63.87
0.67652	63.43
0.67732	62.93
0.67812	62.47
0.67891	62.01
0.67971	61.56
0.68051	61.19
0.68131	60.76
0.68211	60.37
0.68291	59.94
0.68371	59.48
0.6845	59.03
0.6853	58.55
0.6861	58.05
0.6869	57.57
0.6877	57.09
0.6885	56.58
0.6893	56.14
0.6901	55.63
0.69089	55.16
0.69169	54.68
0.69249	54.26
0.69329	53.85
0.69409	53.42
0.69489	52.98
0.69569	52.51
0.69649	52.03
0.69728	51.53
0.69808	51.02
0.69888	50.5
0.69968	49.91
0.70048	49.32
0.70128	48.71
0.70208	48.1
0.70288	47.5
0.70367	46.95
0.70447	46.41
0.70527	45.82
0.70607	45.33
0.70687	44.83
0.70767	44.36
0.70847	43.88
0.70927	43.39
0.71006	42.86
0.71086	42.27
0.71166	41.63
0.71246	41.12
0.71326	40.64
0.71406	40.22
0.71486	39.83
0.71565	39.41
0.71645	38.96
0.71725	38.49
0.71805	38.03
0.71885	37.6
0.71965	37.12
0.72045	36.68
0.72125	36.33
0.72204	36.2
0.72284	36.19
0.72364	36.13
0.72444	35.85
0.72524	35.45
0.72604	34.95
0.72684	34.46
0.72764	33.97
0.72843	33.5
0.72923	33.09
0.73003	32.68
0.73083	32.32
0.73163	31.97
0.73243	31.65
0.73323	31.36
0.73403	31.08
0.73482	30.79
0.73562	30.57
0.73642	30.31
0.73722	30.02
0.73802	29.69
0.73882	29.37
0.73962	29.02
0.74042	28.65
0.74121	28.23
0.74201	27.88
0.74281	27.56
0.74361	27.33
0.74441	27.05
0.74521	26.75
0.74601	26.46
0.74681	26.17
0.7476	25.84
0.7484	25.52
0.7492	25.21
0.75	24.91
0.7508	24.57
0.7516	24.29
0.7524	24.03
0.75319	23.71
0.75399	23.44
0.75479	23.19
0.75559	22.94
0.75639	22.77
0.75719	22.61
0.75799	22.46
0.75879	22.31
0.75958	22.14
0.76038	21.99
0.76118	21.82
0.76198	21.67
0.76278	21.52
0.76358	21.38
0.76438	21.23
0.76518	21.07
0.76597	20.9
0.76677	20.72
0.76757	20.54
0.76837	20.36
0.76917	20.2
0.76997	20.02
0.77077	19.87
0.77157	19.72
0.77236	19.54
0.77316	19.36
0.77396	19.15
0.77476	18.94
0.77556	18.76
0.77636	18.57
0.77716	18.43
0.77796	18.4
0.77875	18.43
0.77955	18.43
0.78035	18.36
0.78115	18.28
0.78195	18.21
0.78275	18.14
0.78355	18.07
0.78435	17.99
0.78514	17.9
0.78594	17.82
0.78674	17.72
0.78754	17.63
0.78834	17.52
0.78914	17.43
0.78994	17.33
0.79073	17.22
0.79153	17.11
0.79233	17
0.79313	16.89
0.79393	16.79
0.79473	16.69
0.79553	16.59
0.79633	16.5
0.79712	16.4
0.79792	16.31
0.79872	16.22
0.79952	16.1
0.80032	16.02
0.80112	15.96
0.80192	15.85
0.80272	15.53
0.80351	15.09
0.80431	14.71
0.80511	14.5
0.80591	14.48
0.80671	14.43
0.80751	14.38
0.80831	14.33
0.80911	14.28
0.8099	14.28
0.8107	14.23
0.8115	14.3
0.8123	14.59
0.8131	15.3
0.8139	16.24
0.8147	17.18
0.8155	17.77
0.81629	17.97
0.81709	17.99
0.81789	17.96
0.81869	17.97
0.81949	17.98
0.82029	17.97
0.82109	17.96
0.82188	17.97
0.82268	17.98
0.82348	17.99
0.82428	17.91
0.82508	17.83
0.82588	17.8
0.82668	17.79
0.82748	17.74
0.82827	17.71
0.82907	17.66
0.82987	17.63
0.83067	17.61
0.83147	17.6
0.83227	17.58
0.83307	17.56
0.83387	17.54
0.83466	17.52
0.83546	17.5
0.83626	17.48
0.83706	17.43
0.83786	17.39
0.83866	17.35
0.83946	17.31
0.84026	17.27
0.84105	17.24
0.84185	17.22
0.84265	17.21
0.84345	17.19
0.84425	17.18
0.84505	17.19
0.84585	17.21
0.84665	17.26
0.84744	17.28
0.84824	17.3
0.84904	17.33
0.84984	17.34
0.85064	17.34
0.85144	17.34
0.85224	17.34
0.85304	17.34
0.85383	17.37
0.85463	17.42
0.85543	17.48
0.85623	17.52
0.85703	17.57
0.85783	17.57
0.85863	17.5
0.85942	17.39
0.86022	17.37
0.86102	17.48
0.86182	17.59
0.86262	17.67
0.86342	17.7
0.86422	17.71
0.86502	17.73
0.86581	17.75
0.86661	17.79
0.86741	17.81
0.86821	17.83
0.86901	17.86
0.86981	17.88
0.87061	17.92
0.87141	17.96
0.8722	17.99
0.873	18.03
0.8738	18.07
0.8746	18.09
0.8754	18.1
0.8762	18.11
0.877	18.12
0.8778	18.13
0.87859	18.13
0.87939	18.13
0.88019	18.13
0.88099	18.15
0.88179	18.16
0.88259	18.17
0.88339	18.17
0.88419	18.18
0.88498	18.17
0.88578	18.19
0.88658	18.21
0.88738	18.32
0.88818	18.43
0.88898	18.5
0.88978	18.55
0.89058	18.53
0.89137	18.54
0.89217	18.43
0.89297	18.07
0.89377	17.32
0.89457	16.32
0.89537	15.34
0.89617	14.72
0.89696	14.5
0.89776	14.51
0.89856	14.54
0.89936	14.53
0.90016	14.52
0.90096	14.53
0.90176	14.53
0.90256	14.53
0.90335	14.52
0.90415	14.48
0.90495	14.48
0.90575	14.5
0.90655	14.54
0.90735	14.57
0.90815	14.6
0.90895	14.61
0.90974	14.65
0.91054	14.65
0.91134	14.65
0.91214	14.65
0.91294	14.65
0.91374	14.65
0.91454	14.65
0.91534	14.66
0.91613	14.69
0.91693	14.7
0.91773	14.73
0.91853	14.74
0.91933	14.75
0.92013	14.75
0.92093	14.77
0.92173	14.79
0.92252	14.81
0.92332	14.82
0.92412	14.82
0.92492	14.82
0.92572	14.82
0.92652	14.79
0.92732	14.74
0.92812	14.72
0.92891	14.69
0.92971	14.67
0.93051	14.67
0.93131	14.68
0.93211	14.67
0.93291	14.66
0.93371	14.66
0.9345	14.65
0.9353	14.61
0.9361	14.56
0.9369	14.51
0.9377	14.49
0.9385	14.48
0.9393	14.47
0.9401	14.44
0.94089	14.32
0.94169	14.2
0.94249	14.09
0.94329	14.02
0.94409	14.03
0.94489	14.05
0.94569	14.07
0.94649	14.07
0.94728	14.05
0.94808	14.05
0.94888	14.07
0.94968	14.07
0.95048	14.07
0.95128	14.07
0.95208	14.06
0.95288	14.06
0.95367	14.05
0.95447	14.04
0.95527	14.05
0.95607	14.06
0.95687	14.07
0.95767	14.08
0.95847	14.09
0.95927	14.11
0.96006	14.13
0.96086	14.17
0.96166	14.19
0.96246	14.22
0.96326	14.25
0.96406	14.26
0.96486	14.28
0.96565	14.3
0.96645	14.31
0.96725	14.27
0.96805	14.18
0.96885	14.11
0.96965	14.06
0.97045	14.02
0.97125	14.01
0.97204	14.02
0.97284	14.05
0.97364	14.24
0.97444	14.8
0.97524	15.6
0.97604	16.35
0.97684	16.76
0.97764	16.83
0.97843	16.77
0.97923	16.74
0.98003	16.84
0.98083	17.25
0.98163	17.81
0.98243	18.19
0.98323	18.29
0.98403	18.29
0.98482	18.29
0.98562	18.29
0.98642	18.27
0.98722	18.25
0.98802	18.23
0.98882	18.25
0.98962	18.27
0.99042	18.27
0.99121	18.31
0.99201	18.35
0.99281	18.39
0.99361	18.43
0.99441	18.48
0.99521	18.52
0.99601	18.56
0.99681	18.58
0.9976	18.61
0.9984	18.64
0.9992	18.68
1	18.72
1.0008	18.77
1.0016	18.81
1.0024	18.84
1.00319	18.88
1.00399	18.91
1.00479	18.95
1.00559	19
1.00639	19.03
1.00719	19.09
1.00799	19.17
1.00879	19.49
1.00958	20.22
1.01038	21.33
1.01118	22.59
1.01198	23.59
1.01278	24.07
1.01358	24.22
1.01438	24.35
1.01518	24.45
1.01597	24.59
1.01677	24.73
1.01757	24.87
1.01837	25
1.01917	25.09
1.01997	25.17
1.02077	25.25
1.02157	25.38
1.02236	25.5
1.02316	25.61
1.02396	25.69
1.02476	25.75
1.02556	25.81
1.02636	25.91
1.02716	26.03
1.02796	26.15
1.02875	26.26
1.02955	26.31
1.03035	26.4
1.03115	26.44
1.03195	26.46
1.03275	26.47
1.03355	26.46
1.03435	26.44
1.03514	26.42
1.03594	26.39
1.03674	26.38
1.03754	26.36
1.03834	26.35
1.03914	26.35
1.03994	26.36
1.04073	26.37
1.04153	26.35
1.04233	26.33
1.04313	26.29
1.04393	26.25
1.04473	26.22
1.04553	26.18
1.04633	26.14
1.04712	26.1
1.04792	26.09
1.04872	26.1
1.04952	26.12
1.05032	26.2
1.05112	26.28
1.05192	26.32
1.05272	26.35
1.05351	26.35
1.05431	26.21
1.05511	25.7
1.05591	24.96
1.05671	24.25
1.05751	23.86
1.05831	23.81
1.05911	23.84
1.0599	23.87
1.0607	23.75
1.0615	23.34
1.0623	22.77
1.0631	22.4
1.0639	22.29
1.0647	22.3
1.0655	22.29
1.06629	22.28
1.06709	22.27
1.06789	22.26
1.06869	22.25
1.06949	22.22
1.07029	22.19
1.07109	22.17
1.07188	22.14
1.07268	22.11
1.07348	22.1
1.07428	22.09
1.07508	22.07
1.07588	22.05
1.07668	22.02
1.07748	22.01
1.07827	21.99
1.07907	21.98
1.07987	21.95
1.08067	21.92
1.08147	21.89
1.08227	21.87
1.08307	21.88
1.08387	21.86
1.08466	21.83
1.08546	21.81
1.08626	21.76
1.08706	21.72
1.08786	21.68
1.08866	21.6
1.08946	21.31
1.09026	20.65
1.09105	19.59
1.09185	18.41
1.09265	17.46
1.09345	17.05
1.09425	16.97
1.09505	16.89
1.09585	16.84
1.09665	16.73
1.09744	16.64
1.09824	16.54
1.09904	16.45
1.09984	16.39
1.10064	16.33
1.10144	16.28
1.10224	16.18
1.10304	16.08
1.10383	15.98
1.10463	15.94
1.10543	15.9
1.10623	15.85
1.10703	15.77
1.10783	15.69
1.10863	15.59
1.10942	15.5
1.11022	15.44
1.11102	15.34
1.11182	15.29
1.11262	15.27
1.11342	15.26
1.11422	15.27
1.11502	15.34
1.11581	15.42
1.11661	15.5
1.11741	15.52
1.11821	15.57
1.11901	15.62
1.11981	15.66
1.12061	15.7
1.12141	15.79
1.1222	15.87
1.123	15.92
1.1238	15.99
1.1246	16.05
1.1254	16.11
1.1262	16.18
1.127	16.3
1.1278	16.42
1.12859	16.52
1.12939	16.57
1.13019	16.63
1.13099	16.66
1.13179	16.7
1.13259	16.78
1.13339	16.82
1.13419	16.91
1.13498	16.95
1.13578	17.02
1.13658	17.09
1.13738	17.18
1.13818	17.26
1.13898	17.29
1.13978	17.3
1.14058	17.28
1.14137	17.28
1.14217	17.28
1.14297	17.32
1.14377	17.37
1.14457	17.45
1.14537	17.51
1.14617	17.61
1.14696	17.79
1.14776	17.93
1.14856	18.06
1.14936	18.19
1.15016	18.25
1.15096	18.3
1.15176	18.36
1.15256	18.37
1.15335	18.39
1.15415	18.43
1.15495	18.43
1.15575	18.41
1.15655	18.39
1.15735	18.38
1.15815	18.36
1.15895	18.37
1.15974	18.37
1.16054	18.37
1.16134	18.38
1.16214	18.39
1.16294	18.38
1.16374	18.36
1.16454	18.37
1.16534	18.41
1.16613	18.44
1.16693	18.5
1.16773	18.5
1.16853	18.5
1.16933	18.5
1.17013	18.49
1.17093	18.43
1.17173	18.39
1.17252	18.38
1.17332	18.36
1.17412	18.39
1.17492	18.45
1.17572	18.49
1.17652	18.48
1.17732	18.47
1.17812	18.45
1.17891	18.45
1.17971	18.45
1.18051	18.45
1.18131	18.45
1.18211	18.45
1.18291	18.46
1.18371	18.47
1.1845	18.46
1.1853	18.43
1.1861	18.4
1.1869	18.38
1.1877	18.35
1.1885	18.33
1.1893	18.37
1.1901	18.39
1.19089	18.41
1.19169	18.44
1.19249	18.47
1.19329	18.47
1.19409	18.48
1.19489	18.49
1.19569	18.46
1.19649	18.43
1.19728	18.41
1.19808	18.41
1.19888	18.42
1.19968	18.42
1.20048	18.42
1.20128	18.43
1.20208	18.44
1.20288	18.54
1.20367	18.69
1.20447	18.83
1.20527	18.94
1.20607	19.03
1.20687	19.1
1.20767	19.09
1.20847	19.07
1.20927	19.09
1.21006	19.2
1.21086	19.27
1.21166	19.37
1.21246	19.46
1.21326	19.51
1.21406	19.6
1.21486	19.61
1.21565	19.64
1.21645	19.6
1.21725	19.51
1.21805	19.4
1.21885	19.29
1.21965	19.23
1.22045	19.2
1.22125	19.22
1.22204	19.24
1.22284	19.26
1.22364	19.25
1.22444	19.28
1.22524	19.25
1.22604	19.26
1.22684	19.26
1.22764	19.14
1.22843	19.06
1.22923	18.98
1.23003	18.89
1.23083	18.85
1.23163	18.83
1.23243	18.79
1.23323	18.8
1.23403	18.8
1.23482	18.76
1.23562	18.76
1.23642	18.76
1.23722	18.76
1.23802	18.76
1.23882	18.76
1.23962	18.76
1.24042	18.76
1.24121	18.78
1.24201	18.79
1.24281	18.83
1.24361	18.91
1.24441	18.97
1.24521	18.97
1.24601	18.95
1.24681	18.93
1.2476	18.87
1.2484	18.88
1.2492	18.89
1.25	18.92
1.2508	18.93
1.2516	18.94
1.2524	18.95
1.25319	18.9
1.25399	18.88
1.25479	18.82
1.25559	18.72
1.25639	18.67
1.25719	18.65
1.25799	18.67
1.25879	18.67
1.25958	18.67
1.26038	18.66
1.26118	18.65
1.26198	18.65
1.26278	18.66
1.26358	18.68
1.26438	18.7
1.26518	18.74
1.26597	18.77
1.26677	18.8
1.26757	18.83
1.26837	18.86
1.26917	18.88
1.26997	18.84
1.27077	18.83
1.27157	18.82
1.27236	18.81
1.27316	18.81
1.27396	18.81
1.27476	18.81
1.27556	18.83
1.27636	18.88
1.27716	18.88
1.27796	18.88
1.27875	18.89
1.27955	18.88
1.28035	18.85
1.28115	18.82
1.28195	18.78
1.28275	18.68
1.28355	18.51
1.28435	18.33
1.28514	18.15
1.28594	18.02
1.28674	17.91
1.28754	17.79
1.28834	17.7
1.28914	17.62
1.28994	17.5
1.29073	17.34
1.29153	17.17
1.29233	16.98
1.29313	16.78
1.29393	16.62
1.29473	16.49
1.29553	16.4
1.29633	16.32
1.29712	16.28
1.29792	16.29
1.29872	16.33
1.29952	16.38
1.30032	16.41
1.30112	16.42
1.30192	16.42
1.30272	16.4
1.30351	16.39
1.30431	16.37
1.30511	16.31
1.30591	16.29
1.30671	16.23
1.30751	16.17
1.30831	16.15
1.30911	16.13
1.3099	16.12
1.3107	16.13
1.3115	16.14
1.3123	16.15
1.3131	16.17
1.3139	16.17
1.3147	16.18
1.3155	16.19
1.31629	16.19
1.31709	16.21
1.31789	16.25
1.31869	16.29
1.31949	16.34
1.32029	16.37
1.32109	16.4
1.32188	16.42
1.32268	16.44
1.32348	16.43
1.32428	16.39
1.32508	16.35
1.32588	16.37
1.32668	16.4
1.32748	16.43
1.32827	16.46
1.32907	16.49
1.32987	16.5
1.33067	16.52
1.33147	16.53
1.33227	16.54
1.33307	16.58
1.33387	16.66
1.33466	16.7
1.33546	16.73
1.33626	16.76
1.33706	16.77
1.33786	16.78
1.33866	16.77
1.33946	16.78
1.34026	16.79
1.34105	16.81
1.34185	16.83
1.34265	16.85
1.34345	16.85
1.34425	16.84
1.34505	16.82
1.34585	16.8
1.34665	16.8
1.34744	16.79
1.34824	16.8
1.34904	16.81
1.34984	16.83
1.35064	16.91
1.35144	17
1.35224	17.09
1.35304	17.14
1.35383	17.21
1.35463	17.25
1.35543	17.29
1.35623	17.3
1.35703	17.27
1.35783	17.26
1.35863	17.25
1.35942	17.24
1.36022	17.25
1.36102	17.28
1.36182	17.31
1.36262	17.33
1.36342	17.37
1.36422	17.44
1.36502	17.48
1.36581	17.52
1.36661	17.59
1.36741	17.62
1.36821	17.67
1.36901	17.71
1.36981	17.75
1.37061	17.77
1.37141	17.8
1.3722	17.83
1.373	17.84
1.3738	17.86
1.3746	17.87
1.3754	17.86
1.3762	17.85
1.377	17.84
1.3778	17.83
1.37859	17.83
1.37939	17.82
1.38019	17.8
1.38099	17.8
1.38179	17.81
1.38259	17.81
1.38339	17.83
1.38419	17.83
1.38498	17.83
1.38578	17.81
1.38658	17.8
1.38738	17.78
1.38818	17.77
1.38898	17.76
1.38978	17.75
1.39058	17.74
1.39137	17.72
1.39217	17.73
1.39297	17.82
1.39377	18.02
1.39457	18.12
1.39537	18.12
1.39617	18.12
1.39696	18.12
1.39776	18.11
1.39856	18.1
1.39936	18.07
1.40016	18.03
1.40096	18.01
1.40176	17.99
1.40256	17.97
1.40335	17.96
1.40415	17.95
1.40495	17.92
1.40575	17.88
1.40655	17.84
1.40735	17.82
1.40815	17.79
1.40895	17.77
1.40974	17.74
1.41054	17.71
1.41134	17.68
1.41214	17.66
1.41294	17.64
1.41374	17.6
1.41454	17.52
1.41534	17.49
1.41613	17.45
1.41693	17.42
1.41773	17.39
1.41853	17.38
1.41933	17.36
1.42013	17.34
1.42093	17.31
1.42173	17.28
1.42252	17.25
1.42332	17.23
1.42412	17.21
1.42492	17.19
1.42572	17.18
1.42652	17.17
1.42732	17.15
1.42812	17.16
1.42891	17.14
1.42971	17.12
1.43051	17.1
1.43131	17.03
1.43211	16.95
1.43291	16.87
1.43371	16.83
1.4345	16.76
1.4353	16.73
1.4361	16.7
1.4369	16.68
1.4377	16.66
1.4385	16.66
1.4393	16.66
1.4401	16.66
1.44089	16.64
1.44169	16.62
1.44249	16.62
1.44329	16.6
1.44409	16.58
1.44489	16.52
1.44569	16.5
1.44649	16.48
1.44728	16.42
1.44808	16.4
1.44888	16.38
1.44968	16.37
1.45048	16.36
1.45128	16.37
1.45208	16.35
1.45288	16.33
1.45367	16.31
1.45447	16.29
1.45527	16.27
1.45607	16.26
1.45687	16.26
1.45767	16.25
1.45847	16.24
1.45927	16.21
1.46006	16.19
1.46086	16.17
1.46166	16.15
1.46246	16.13
1.46326	16.1
1.46406	16.08
1.46486	16.07
1.46565	16.06
1.46645	16.05
1.46725	16.03
1.46805	16.02
1.46885	16.01
1.46965	16
1.47045	15.99
1.47125	15.98
1.47204	15.97
1.47284	15.95
1.47364	15.84
1.47444	15.62
1.47524	15.52
1.47604	15.5
1.47684	15.49
1.47764	15.48
1.47843	15.48
1.47923	15.46
1.48003	15.46
1.48083	15.48
1.48163	15.48
1.48243	15.48
1.48323	15.49
1.48403	15.49
1.48482	15.48
1.48562	15.49
1.48642	15.5
1.48722	15.52
1.48802	15.53
1.48882	15.53
1.48962	15.55
1.49042	15.55
1.49121	15.55
1.49201	15.55
1.49281	15.57
1.49361	15.59
1.49441	15.61
1.49521	15.63
1.49601	15.63
1.49681	15.63
1.4976	15.63
1.4984	15.63
1.4992	15.63
1.5	15.66
1.5008	15.68
1.5016	15.71
1.5024	15.74
1.50319	15.75
1.50399	15.75
1.50479	15.75
1.50559	15.75
1.50639	15.75
1.50719	15.76
1.50799	15.78
1.50879	15.78
1.50958	15.79
1.51038	15.8
1.51118	15.8
1.51198	15.79
1.51278	15.8
1.51358	15.8
1.51438	15.81
1.51518	15.82
1.51597	15.83
1.51677	15.84
1.51757	15.85
1.51837	15.86
1.51917	15.88
1.51997	15.9
1.52077	15.92
1.52157	15.94
1.52236	15.94
1.52316	15.92
1.52396	15.93
1.52476	15.92
1.52556	15.92
1.52636	15.92
1.52716	15.92
1.52796	15.91
1.52875	15.9
1.52955	15.9
1.53035	15.89
1.53115	15.88
1.53195	15.85
1.53275	15.84
1.53355	15.83
1.53435	15.82
1.53514	15.81
1.53594	15.82
1.53674	15.82
1.53754	15.81
1.53834	15.81
1.53914	15.81
1.53994	15.82
1.54073	15.82
1.54153	15.82
1.54233	15.82
1.54313	15.82
1.54393	15.83
1.54473	15.83
1.54553	15.84
1.54633	15.83
1.54712	15.84
1.54792	15.85
1.54872	15.87
1.54952	15.89
1.55032	15.95
1.55112	16.01
1.55192	16.03
1.55272	16.05
1.55351	16.07
1.55431	16.09
1.55511	16.11
1.55591	16.12
1.55671	16.14
1.55751	16.15
1.55831	16.17
1.55911	16.18
1.5599	16.2
1.5607	16.22
1.5615	16.22
1.5623	16.21
1.5631	16.22
1.5639	16.23
1.5647	16.22
1.5655	16.23
1.56629	16.24
1.56709	16.25
1.56789	16.25
1.56869	16.24
1.56949	16.25
1.57029	16.24
1.57109	16.25
1.57188	16.26
1.57268	16.29
1.57348	16.3
1.57428	16.31
1.57508	16.32
1.57588	16.33
1.57668	16.36
1.57748	16.39
1.57827	16.41
1.57907	16.43
1.57987	16.44
1.58067	16.43
1.58147	16.43
1.58227	16.42
1.58307	16.41
1.58387	16.43
1.58466	16.45
1.58546	16.45
1.58626	16.47
1.58706	16.48
1.58786	16.48
1.58866	16.47
1.58946	16.46
1.59026	16.45
1.59105	16.43
1.59185	16.41
1.59265	16.42
1.59345	16.39
1.59425	16.38
1.59505	16.4
1.59585	16.38
[truncated: 1,783 more rows]

## Sheet: 2C
Note: Hairs were scanned from root (0 cm) to tip, but are graphed from tip (as 0 cm) to root. Therefore, all hairs are reversed when graphed.
Distance (cm)	Intensity (A.U.)
0.0008	58.39
0.0016	58.55
0.0024	59.09
0.00319	59.55
0.00399	59.92
0.00479	60.16
0.00559	60.32
0.00639	60.45
0.00719	60.5
0.00799	60.48
0.00879	60.44
0.00958	60.46
0.01038	60.66
0.01118	61.06
0.01198	61.48
0.01278	61.77
0.01358	61.97
0.01438	62.2
0.01518	62.53
0.01597	62.97
0.01677	63.35
0.01757	63.6
0.01837	63.79
0.01917	63.96
0.01997	64.21
0.02077	64.5
0.02157	64.89
0.02236	65.28
0.02316	65.56
0.02396	65.83
0.02476	66.14
0.02556	66.53
0.02636	66.89
0.02716	67.27
0.02796	67.65
0.02875	68.02
0.02955	68.36
0.03035	68.72
0.03115	69.15
0.03195	69.66
0.03275	70.2
0.03355	70.68
0.03435	71.2
0.03514	71.69
0.03594	72.17
0.03674	72.69
0.03754	73.21
0.03834	73.73
0.03914	74.28
0.03994	74.85
0.04073	75.41
0.04153	75.9
0.04233	76.38
0.04313	76.8
0.04393	77.21
0.04473	77.53
0.04553	77.83
0.04633	78.15
0.04712	78.51
0.04792	78.89
0.04872	79.18
0.04952	79.38
0.05032	79.5
0.05112	79.6
0.05192	79.7
0.05272	79.83
0.05351	79.91
0.05431	79.92
0.05511	79.91
0.05591	79.89
0.05671	79.87
0.05751	79.91
0.05831	80.03
0.05911	80.18
0.0599	80.36
0.0607	80.6
0.0615	80.9
0.0623	81.23
0.0631	81.53
0.0639	81.8
0.0647	82.05
0.0655	82.36
0.06629	82.67
0.06709	83.03
0.06789	83.48
0.06869	83.98
0.06949	84.43
0.07029	84.7
0.07109	84.96
0.07188	85.22
0.07268	85.46
0.07348	85.64
0.07428	85.86
0.07508	86.05
0.07588	86.19
0.07668	86.32
0.07748	86.47
0.07827	86.7
0.07907	86.93
0.07987	87.09
0.08067	87.24
0.08147	87.39
0.08227	87.55
0.08307	87.78
0.08387	88.07
0.08466	88.39
0.08546	88.67
0.08626	88.93
0.08706	89.15
0.08786	89.39
0.08866	89.68
0.08946	90.08
0.09026	90.5
0.09105	90.85
0.09185	91.14
0.09265	91.37
0.09345	91.62
0.09425	91.91
0.09505	92.09
0.09585	92.16
0.09665	92.16
0.09744	92.19
0.09824	92.28
0.09904	92.42
0.09984	92.54
0.10064	92.6
0.10144	92.62
0.10224	92.54
0.10304	92.45
0.10383	92.5
0.10463	92.63
0.10543	92.7
0.10623	92.7
0.10703	92.69
0.10783	92.67
0.10863	92.71
0.10942	92.77
0.11022	92.84
0.11102	92.92
0.11182	92.97
0.11262	92.93
0.11342	92.82
0.11422	92.78
0.11502	92.75
0.11581	92.73
0.11661	92.73
0.11741	92.69
0.11821	92.59
0.11901	92.53
0.11981	92.44
0.12061	92.27
0.12141	92.11
0.1222	91.91
0.123	91.75
0.1238	91.68
0.1246	91.65
0.1254	91.63
0.1262	91.67
0.127	91.71
0.1278	91.76
0.12859	91.81
0.12939	91.89
0.13019	92
0.13099	92.15
0.13179	92.32
0.13259	92.45
0.13339	92.57
0.13419	92.77
0.13498	92.99
0.13578	93.17
0.13658	93.3
0.13738	93.36
0.13818	93.33
0.13898	93.31
0.13978	93.27
0.14058	93.24
0.14137	93.14
0.14217	92.97
0.14297	92.79
0.14377	92.61
0.14457	92.48
0.14537	92.38
0.14617	92.22
0.14696	92.04
0.14776	91.84
0.14856	91.67
0.14936	91.5
0.15016	91.37
0.15096	91.33
0.15176	91.24
0.15256	91.14
0.15335	91.12
0.15415	91.19
0.15495	91.15
0.15575	91.07
0.15655	90.93
0.15735	90.73
0.15815	90.47
0.15895	90.16
0.15974	89.89
0.16054	89.67
0.16134	89.46
0.16214	89.26
0.16294	89.01
0.16374	88.74
0.16454	88.45
0.16534	88.13
0.16613	87.83
0.16693	87.54
0.16773	87.24
0.16853	86.97
0.16933	86.7
0.17013	86.34
0.17093	85.95
0.17173	85.54
0.17252	85.17
0.17332	84.84
0.17412	84.57
0.17492	84.34
0.17572	84.16
0.17652	83.98
0.17732	83.8
0.17812	83.64
0.17891	83.58
0.17971	83.62
0.18051	83.73
0.18131	83.9
0.18211	84.11
0.18291	84.37
0.18371	84.67
0.1845	84.95
0.1853	85.19
0.1861	85.46
0.1869	85.71
0.1877	85.99
0.1885	86.27
0.1893	86.5
0.1901	86.71
0.19089	86.9
0.19169	87.06
0.19249	87.21
0.19329	87.37
0.19409	87.56
0.19489	87.74
0.19569	87.88
0.19649	88
0.19728	88.09
0.19808	88.23
0.19888	88.5
0.19968	88.79
0.20048	89.11
0.20128	89.47
0.20208	89.82
0.20288	90.22
0.20367	90.57
0.20447	90.89
0.20527	91.18
0.20607	91.51
0.20687	91.81
0.20767	92.09
0.20847	92.34
0.20927	92.57
0.21006	92.84
0.21086	93.1
0.21166	93.36
0.21246	93.65
0.21326	93.99
0.21406	94.35
0.21486	94.69
0.21565	95.08
0.21645	95.48
0.21725	95.87
0.21805	96.31
0.21885	96.77
0.21965	97.19
0.22045	97.6
0.22125	97.95
0.22204	98.32
0.22284	98.72
0.22364	99.09
0.22444	99.47
0.22524	99.87
0.22604	100.22
0.22684	100.48
0.22764	100.64
0.22843	100.72
0.22923	100.77
0.23003	100.84
0.23083	100.94
0.23163	101.13
0.23243	101.35
0.23323	101.55
0.23403	101.69
0.23482	101.75
0.23562	101.88
0.23642	102.08
0.23722	102.32
0.23802	102.63
0.23882	102.96
0.23962	103.27
0.24042	103.54
0.24121	103.84
0.24201	104.15
0.24281	104.42
0.24361	104.69
0.24441	104.97
0.24521	105.24
0.24601	105.47
0.24681	105.66
0.2476	105.84
0.2484	106.04
0.2492	106.23
0.25	106.41
0.2508	106.66
0.2516	106.92
0.2524	107.2
0.25319	107.46
0.25399	107.72
0.25479	108.02
0.25559	108.33
0.25639	108.62
0.25719	108.91
0.25799	109.17
0.25879	109.35
0.25958	109.46
0.26038	109.55
0.26118	109.62
0.26198	109.67
0.26278	109.75
0.26358	109.87
0.26438	110.05
0.26518	110.26
0.26597	110.48
0.26677	110.61
0.26757	110.76
0.26837	110.91
0.26917	111
0.26997	111.06
0.27077	111.07
0.27157	111.09
0.27236	111.07
0.27316	111.04
0.27396	111.01
0.27476	110.97
0.27556	110.94
0.27636	110.91
0.27716	110.9
0.27796	110.92
0.27875	110.93
0.27955	110.91
0.28035	110.87
0.28115	110.84
0.28195	110.79
0.28275	110.72
0.28355	110.64
0.28435	110.61
0.28514	110.64
0.28594	110.73
0.28674	110.83
0.28754	110.93
0.28834	111.05
0.28914	111.16
0.28994	111.27
0.29073	111.41
0.29153	111.53
0.29233	111.65
0.29313	111.73
0.29393	111.82
0.29473	111.88
0.29553	111.96
0.29633	112.09
0.29712	112.19
0.29792	112.28
0.29872	112.28
0.29952	112.28
0.30032	112.39
0.30112	112.54
0.30192	112.69
0.30272	112.82
0.30351	113
0.30431	113.3
0.30511	113.53
0.30591	113.72
0.30671	113.9
0.30751	114.07
0.30831	114.29
0.30911	114.54
0.3099	114.68
0.3107	114.81
0.3115	114.93
0.3123	114.98
0.3131	114.97
0.3139	114.92
0.3147	114.91
0.3155	115
0.31629	115.12
0.31709	115.21
0.31789	115.3
0.31869	115.34
0.31949	115.41
0.32029	115.48
0.32109	115.51
0.32188	115.5
0.32268	115.45
0.32348	115.45
0.32428	115.5
0.32508	115.57
0.32588	115.69
0.32668	115.82
0.32748	115.93
0.32827	116.04
0.32907	116.06
0.32987	116
0.33067	115.91
0.33147	115.78
0.33227	115.64
0.33307	115.5
0.33387	115.32
0.33466	115.12
0.33546	114.89
0.33626	114.71
0.33706	114.54
0.33786	114.38
0.33866	114.21
0.33946	114.05
0.34026	113.89
0.34105	113.69
0.34185	113.48
0.34265	113.31
0.34345	113.15
0.34425	112.95
0.34505	112.7
0.34585	112.46
0.34665	112.19
0.34744	111.97
0.34824	111.76
0.34904	111.56
0.34984	111.46
0.35064	111.41
0.35144	111.44
0.35224	111.49
0.35304	111.51
0.35383	111.54
0.35463	111.63
0.35543	111.71
0.35623	111.84
0.35703	111.93
0.35783	111.98
0.35863	112.03
0.35942	112.06
0.36022	112.14
0.36102	112.24
0.36182	112.29
0.36262	112.34
0.36342	112.35
0.36422	112.37
0.36502	112.32
0.36581	112.14
0.36661	111.92
0.36741	111.76
0.36821	111.55
0.36901	111.33
0.36981	111.07
0.37061	110.84
0.37141	110.53
0.3722	110.23
0.373	109.9
0.3738	109.57
0.3746	109.25
0.3754	108.97
0.3762	108.73
0.377	108.46
0.3778	108.2
0.37859	107.96
0.37939	107.8
0.38019	107.6
0.38099	107.32
0.38179	107.01
0.38259	106.75
0.38339	106.5
0.38419	106.19
0.38498	105.77
0.38578	105.41
0.38658	105.02
0.38738	104.61
0.38818	104.24
0.38898	103.87
0.38978	103.49
0.39058	103.17
0.39137	102.84
0.39217	102.56
0.39297	102.32
0.39377	102.14
0.39457	102
0.39537	101.84
0.39617	101.6
0.39696	101.34
0.39776	101.1
0.39856	100.9
0.39936	100.7
0.40016	100.47
0.40096	100.24
0.40176	100.04
0.40256	99.93
0.40335	99.86
0.40415	99.75
0.40495	99.55
0.40575	99.29
0.40655	98.98
0.40735	98.68
0.40815	98.4
0.40895	98.1
0.40974	97.87
0.41054	97.66
0.41134	97.45
0.41214	97.2
0.41294	96.93
0.41374	96.67
0.41454	96.46
0.41534	96.25
0.41613	96.05
0.41693	95.69
0.41773	95.34
0.41853	94.98
0.41933	94.63
0.42013	94.31
0.42093	94.01
0.42173	93.69
0.42252	93.38
0.42332	93.04
0.42412	92.63
0.42492	92.2
0.42572	91.75
0.42652	91.33
0.42732	90.9
0.42812	90.49
0.42891	90.03
0.42971	89.56
0.43051	89.1
0.43131	88.61
0.43211	88.09
0.43291	87.57
0.43371	87.07
0.4345	86.61
0.4353	86.14
0.4361	85.7
0.4369	85.22
0.4377	84.79
0.4385	84.37
0.4393	83.95
0.4401	83.56
0.44089	83.08
0.44169	82.54
0.44249	82.04
0.44329	81.56
0.44409	81.15
0.44489	80.73
0.44569	80.34
0.44649	80.03
0.44728	79.75
0.44808	79.46
0.44888	79.2
0.44968	78.91
0.45048	78.62
0.45128	78.31
0.45208	78.02
0.45288	77.75
0.45367	77.5
0.45447	77.21
0.45527	76.87
0.45607	76.48
0.45687	75.97
0.45767	75.46
0.45847	74.95
0.45927	74.42
0.46006	73.88
0.46086	73.4
0.46166	72.92
0.46246	72.49
0.46326	72.15
0.46406	71.87
0.46486	71.61
0.46565	71.41
0.46645	71.21
0.46725	71.05
0.46805	70.96
0.46885	70.87
0.46965	70.71
0.47045	70.51
0.47125	70.3
0.47204	70.03
0.47284	69.73
0.47364	69.47
0.47444	69.16
0.47524	68.86
0.47604	68.57
0.47684	68.27
0.47764	67.95
0.47843	67.67
0.47923	67.4
0.48003	67.14
0.48083	66.91
0.48163	66.7
0.48243	66.53
0.48323	66.35
0.48403	66.16
0.48482	65.98
0.48562	65.8
0.48642	65.62
0.48722	65.45
0.48802	65.29
0.48882	65.15
0.48962	65.02
0.49042	64.88
0.49121	64.77
0.49201	64.66
0.49281	64.59
0.49361	64.55
0.49441	64.5
0.49521	64.44
0.49601	64.37
0.49681	64.3
0.4976	64.34
0.4984	64.4
0.4992	64.45
0.5	64.48
0.5008	64.5
0.5016	64.5
0.5024	64.51
0.50319	64.59
0.50399	64.66
0.50479	64.72
0.50559	64.78
0.50639	64.84
0.50719	64.82
0.50799	64.8
0.50879	64.83
0.50958	64.87
0.51038	64.91
0.51118	64.91
0.51198	64.89
0.51278	64.95
0.51358	65
0.51438	65.07
0.51518	65.14
0.51597	65.18
0.51677	65.21
0.51757	65.21
0.51837	65.24
0.51917	65.28
0.51997	65.3
0.52077	65.32
0.52157	65.35
0.52236	65.37
0.52316	65.41
0.52396	65.45
0.52476	65.48
0.52556	65.53
0.52636	65.59
0.52716	65.61
0.52796	65.57
0.52875	65.5
0.52955	65.44
0.53035	65.36
0.53115	65.29
0.53195	65.23
0.53275	65.16
0.53355	65.11
0.53435	65.07
0.53514	65.06
0.53594	65.04
0.53674	65.03
0.53754	65
0.53834	64.95
0.53914	64.9
0.53994	64.88
0.54073	64.86
0.54153	64.83
0.54233	64.78
0.54313	64.68
0.54393	64.49
0.54473	64.27
0.54553	64.08
0.54633	63.85
0.54712	63.56
0.54792	63.23
0.54872	62.88
0.54952	62.6
0.55032	62.39
0.55112	62.21
0.55192	62.09
0.55272	62
0.55351	61.92
0.55431	61.84
0.55511	61.81
0.55591	61.81
0.55671	61.82
0.55751	61.82
0.55831	61.82
0.55911	61.78
0.5599	61.74
0.5607	61.71
0.5615	61.68
0.5623	61.6
0.5631	61.5
0.5639	61.36
0.5647	61.22
0.5655	61.11
0.56629	61.03
0.56709	61.03
0.56789	61.04
0.56869	61.09
0.56949	61.15
0.57029	61.23
0.57109	61.34
0.57188	61.44
0.57268	61.49
0.57348	61.49
0.57428	61.46
0.57508	61.47
0.57588	61.47
0.57668	61.47
0.57748	61.47
0.57827	61.44
0.57907	61.41
0.57987	61.38
0.58067	61.38
0.58147	61.41
0.58227	61.38
0.58307	61.34
0.58387	61.29
0.58466	61.22
0.58546	61.19
0.58626	61.16
0.58706	61.09
0.58786	61.03
0.58866	60.98
0.58946	60.92
0.59026	60.9
0.59105	60.89
0.59185	60.87
0.59265	60.89
0.59345	60.87
0.59425	60.89
0.59505	60.92
0.59585	60.93
0.59665	60.93
0.59744	60.89
0.59824	60.86
0.59904	60.77
0.59984	60.69
0.60064	60.61
0.60144	60.5
0.60224	60.38
0.60304	60.26
0.60383	60.13
0.60463	60.04
0.60543	59.98
0.60623	59.89
0.60703	59.77
0.60783	59.64
0.60863	59.52
0.60942	59.42
0.61022	59.35
0.61102	59.28
0.61182	59.18
0.61262	59.06
0.61342	58.94
0.61422	58.82
0.61502	58.71
0.61581	58.63
0.61661	58.59
0.61741	58.53
0.61821	58.5
0.61901	58.47
0.61981	58.45
0.62061	58.48
0.62141	58.51
0.6222	58.54
0.623	58.55
0.6238	58.52
0.6246	58.53
0.6254	58.54
0.6262	58.52
0.627	58.51
0.6278	58.52
0.62859	58.58
0.62939	58.61
0.63019	58.62
0.63099	58.65
0.63179	58.7
0.63259	58.7
0.63339	58.74
0.63419	58.8
0.63498	58.81
0.63578	58.81
0.63658	58.84
0.63738	58.81
0.63818	58.8
0.63898	58.79
0.63978	58.76
0.64058	58.75
0.64137	58.74
0.64217	58.7
0.64297	58.74
0.64377	58.73
0.64457	58.74
0.64537	58.76
0.64617	58.81
0.64696	58.86
0.64776	58.89
0.64856	58.92
0.64936	58.88
0.65016	58.86
0.65096	58.85
0.65176	58.8
0.65256	58.72
0.65335	58.67
0.65415	58.6
0.65495	58.58
0.65575	58.54
0.65655	58.5
0.65735	58.48
0.65815	58.45
0.65895	58.39
0.65974	58.29
0.66054	58.21
0.66134	58.13
0.66214	58.04
0.66294	58
0.66374	57.94
0.66454	57.83
0.66534	57.75
0.66613	57.68
0.66693	57.63
0.66773	57.59
0.66853	57.53
0.66933	57.45
0.67013	57.35
0.67093	57.25
0.67173	57.16
0.67252	57.1
0.67332	56.99
0.67412	56.87
0.67492	56.74
0.67572	56.6
0.67652	56.49
0.67732	56.41
0.67812	56.36
0.67891	56.3
0.67971	56.27
0.68051	56.23
0.68131	56.18
0.68211	56.19
0.68291	56.24
0.68371	56.3
0.6845	56.35
0.6853	56.38
0.6861	56.41
0.6869	56.48
0.6877	56.58
0.6885	56.68
0.6893	56.77
0.6901	56.82
0.69089	56.79
0.69169	56.74
0.69249	56.71
0.69329	56.69
0.69409	56.7
0.69489	56.73
0.69569	56.77
0.69649	56.78
0.69728	56.81
0.69808	56.85
0.69888	56.87
0.69968	56.91
0.70048	56.98
0.70128	57.03
0.70208	57.06
0.70288	57.1
0.70367	57.12
0.70447	57.2
0.70527	57.3
0.70607	57.38
0.70687	57.46
0.70767	57.53
0.70847	57.62
0.70927	57.62
0.71006	57.63
0.71086	57.61
0.71166	57.58
0.71246	57.55
0.71326	57.58
0.71406	57.53
0.71486	57.43
0.71565	57.35
0.71645	57.29
0.71725	57.16
0.71805	57.08
0.71885	57
0.71965	56.89
0.72045	56.78
0.72125	56.65
0.72204	56.53
0.72284	56.45
0.72364	56.29
0.72444	56.17
0.72524	56.03
0.72604	55.88
0.72684	55.7
0.72764	55.55
0.72843	55.4
0.72923	55.24
0.73003	55.07
0.73083	54.89
0.73163	54.71
0.73243	54.53
0.73323	54.4
0.73403	54.26
0.73482	54.16
0.73562	54.04
0.73642	53.9
0.73722	53.75
0.73802	53.61
0.73882	53.5
0.73962	53.44
0.74042	53.4
0.74121	53.35
0.74201	53.27
0.74281	53.18
0.74361	53.08
0.74441	53.01
0.74521	52.94
0.74601	52.84
0.74681	52.72
0.7476	52.59
0.7484	52.47
0.7492	52.36
0.75	52.27
0.7508	52.13
0.7516	51.97
0.7524	51.81
0.75319	51.64
0.75399	51.5
0.75479	51.37
0.75559	51.22
0.75639	51.06
0.75719	50.85
0.75799	50.63
0.75879	50.42
0.75958	50.22
0.76038	50.03
0.76118	49.84
0.76198	49.67
0.76278	49.47
0.76358	49.22
0.76438	48.96
0.76518	48.7
0.76597	48.42
0.76677	48.11
0.76757	47.77
0.76837	47.42
0.76917	47.09
0.76997	46.79
0.77077	46.53
0.77157	46.31
0.77236	46.1
0.77316	45.92
0.77396	45.76
0.77476	45.57
0.77556	45.33
0.77636	45.06
0.77716	44.82
0.77796	44.54
0.77875	44.28
0.77955	44.05
0.78035	43.82
0.78115	43.54
0.78195	43.26
0.78275	42.98
0.78355	42.71
0.78435	42.5
0.78514	42.27
0.78594	41.97
0.78674	41.68
0.78754	41.39
0.78834	41.1
0.78914	40.83
0.78994	40.62
0.79073	40.45
0.79153	40.27
0.79233	40.07
0.79313	39.84
0.79393	39.59
0.79473	39.38
0.79553	39.19
0.79633	39
0.79712	38.81
0.79792	38.64
0.79872	38.5
0.79952	38.36
0.80032	38.25
0.80112	38.15
0.80192	38.06
0.80272	37.97
0.80351	37.85
0.80431	37.74
0.80511	37.61
0.80591	37.49
0.80671	37.36
0.80751	37.24
0.80831	37.11
0.80911	36.97
0.8099	36.84
0.8107	36.73
0.8115	36.62
0.8123	36.46
0.8131	36.3
0.8139	36.13
0.8147	36
0.8155	35.88
0.81629	35.77
0.81709	35.67
0.81789	35.57
0.81869	35.46
0.81949	35.28
0.82029	35.08
0.82109	34.85
0.82188	34.64
0.82268	34.47
0.82348	34.3
0.82428	34.12
0.82508	33.92
0.82588	33.75
0.82668	33.6
0.82748	33.52
0.82827	33.49
0.82907	33.38
0.82987	33.2
0.83067	33.03
0.83147	32.9
0.83227	32.8
0.83307	32.7
0.83387	32.61
0.83466	32.5
0.83546	32.36
0.83626	32.24
0.83706	32.19
0.83786	32.19
0.83866	32.17
0.83946	32.12
0.84026	32.06
0.84105	31.99
0.84185	31.94
0.84265	31.85
0.84345	31.75
0.84425	31.66
0.84505	31.59
0.84585	31.5
0.84665	31.42
0.84744	31.33
0.84824	31.24
0.84904	31.15
0.84984	31.07
0.85064	30.98
0.85144	30.89
0.85224	30.81
0.85304	30.74
0.85383	30.65
0.85463	30.52
0.85543	30.39
0.85623	30.28
0.85703	30.17
0.85783	30.05
0.85863	29.94
0.85942	29.8
0.86022	29.63
0.86102	29.47
0.86182	29.34
0.86262	29.2
0.86342	29.07
0.86422	28.92
0.86502	28.74
0.86581	28.57
0.86661	28.41
0.86741	28.26
0.86821	28.12
0.86901	27.97
0.86981	27.8
0.87061	27.61
0.87141	27.41
0.8722	27.23
0.873	27.06
0.8738	26.92
0.8746	26.78
0.8754	26.66
0.8762	26.55
0.877	26.46
0.8778	26.33
0.87859	26.2
0.87939	26.05
0.88019	25.88
0.88099	25.71
0.88179	25.56
0.88259	25.41
0.88339	25.25
0.88419	25.12
0.88498	25
0.88578	24.91
0.88658	24.81
0.88738	24.7
0.88818	24.57
0.88898	24.45
0.88978	24.31
0.89058	24.16
0.89137	24.02
0.89217	23.88
0.89297	23.78
0.89377	23.72
0.89457	23.66
0.89537	23.58
0.89617	23.47
0.89696	23.32
0.89776	23.17
0.89856	23.03
0.89936	22.91
0.90016	22.81
0.90096	22.71
0.90176	22.62
0.90256	22.52
0.90335	22.43
0.90415	22.33
0.90495	22.25
0.90575	22.16
0.90655	22.06
0.90735	21.97
0.90815	21.8
0.90895	21.59
0.90974	21.47
0.91054	21.41
0.91134	21.34
0.91214	21.25
0.91294	21.14
0.91374	21.02
0.91454	20.88
0.91534	20.77
0.91613	20.66
0.91693	20.54
0.91773	20.38
0.91853	20.19
0.91933	20.02
0.92013	19.88
0.92093	19.75
0.92173	19.61
0.92252	19.48
0.92332	19.37
0.92412	19.26
0.92492	19.14
0.92572	19.01
0.92652	18.9
0.92732	18.78
0.92812	18.67
0.92891	18.56
0.92971	18.47
0.93051	18.37
0.93131	18.26
0.93211	18.15
0.93291	18.04
0.93371	17.93
0.9345	17.82
0.9353	17.73
0.9361	17.65
0.9369	17.57
0.9377	17.5
0.9385	17.42
0.9393	17.33
0.9401	17.25
0.94089	17.18
0.94169	17.11
0.94249	17.04
0.94329	16.96
0.94409	16.87
0.94489	16.79
0.94569	16.73
0.94649	16.67
0.94728	16.6
0.94808	16.52
0.94888	16.46
0.94968	16.38
0.95048	16.3
0.95128	16.24
0.95208	16.18
0.95288	16.12
0.95367	16.06
0.95447	16
0.95527	15.94
0.95607	15.88
0.95687	15.82
0.95767	15.76
0.95847	15.7
0.95927	15.64
0.96006	15.57
0.96086	15.5
0.96166	15.42
0.96246	15.35
0.96326	15.28
0.96406	15.2
0.96486	15.13
0.96565	15.07
0.96645	14.99
0.96725	14.92
0.96805	14.86
0.96885	14.8
0.96965	14.74
0.97045	14.68
0.97125	14.62
0.97204	14.56
0.97284	14.5
0.97364	14.45
0.97444	14.34
0.97524	14.23
0.97604	14.12
0.97684	14.04
0.97764	13.98
0.97843	13.91
0.97923	13.84
0.98003	13.77
0.98083	13.7
0.98163	13.64
0.98243	13.58
0.98323	13.52
0.98403	13.45
0.98482	13.37
0.98562	13.27
0.98642	13.18
0.98722	13.1
0.98802	13.02
0.98882	12.95
0.98962	12.86
0.99042	12.77
0.99121	12.69
0.99201	12.61
0.99281	12.56
0.99361	12.5
0.99441	12.45
0.99521	12.4
0.99601	12.35
0.99681	12.31
0.9976	12.27
0.9984	12.23
0.9992	12.18
1	12.13
1.0008	12.08
1.0016	12.03
1.0024	11.98
1.00319	11.93
1.00399	11.88
1.00479	11.84
1.00559	11.81
1.00639	11.78
1.00719	11.75
1.00799	11.72
1.00879	11.68
1.00958	11.64
1.01038	11.6
1.01118	11.56
1.01198	11.52
1.01278	11.49
1.01358	11.46
1.01438	11.42
1.01518	11.38
1.01597	11.33
1.01677	11.29
1.01757	11.25
1.01837	11.21
1.01917	11.16
1.01997	11.13
1.02077	11.1
1.02157	11.07
1.02236	11.05
1.02316	11.02
1.02396	10.99
1.02476	10.96
1.02556	10.93
1.02636	10.89
1.02716	10.85
1.02796	10.83
1.02875	10.81
1.02955	10.78
1.03035	10.76
1.03115	10.74
1.03195	10.72
1.03275	10.72
1.03355	10.72
1.03435	10.73
1.03514	10.73
1.03594	10.73
1.03674	10.73
1.03754	10.73
1.03834	10.74
1.03914	10.76
1.03994	10.77
1.04073	10.8
1.04153	10.82
1.04233	10.81
1.04313	10.78
1.04393	10.75
1.04473	10.73
1.04553	10.7
1.04633	10.66
1.04712	10.63
1.04792	10.6
1.04872	10.57
1.04952	10.54
1.05032	10.5
1.05112	10.47
1.05192	10.43
1.05272	10.4
1.05351	10.37
1.05431	10.34
1.05511	10.34
1.05591	10.34
1.05671	10.33
1.05751	10.32
1.05831	10.31
1.05911	10.31
1.0599	10.3
1.0607	10.29
1.0615	10.28
1.0623	10.26
1.0631	10.24
1.0639	10.21
1.0647	10.2
1.0655	10.2
1.06629	10.21
1.06709	10.22
1.06789	10.23
1.06869	10.23
1.06949	10.23
1.07029	10.24
1.07109	10.24
1.07188	10.23
1.07268	10.22
1.07348	10.2
1.07428	10.19
1.07508	10.18
1.07588	10.17
1.07668	10.16
1.07748	10.15
1.07827	10.14
1.07907	10.13
1.07987	10.12
1.08067	10.11
1.08147	10.1
1.08227	10.08
1.08307	10.06
1.08387	10.04
1.08466	10.02
1.08546	10
1.08626	9.98
1.08706	9.96
1.08786	9.94
1.08866	9.93
1.08946	9.92
1.09026	9.92
1.09105	9.91
1.09185	9.89
1.09265	9.88
1.09345	9.87
1.09425	9.86
1.09505	9.86
1.09585	9.86
1.09665	9.86
1.09744	9.84
1.09824	9.82
1.09904	9.8
1.09984	9.78
1.10064	9.75
1.10144	9.72
1.10224	9.69
1.10304	9.65
1.10383	9.62
1.10463	9.6
1.10543	9.59
1.10623	9.58
1.10703	9.56
1.10783	9.54
1.10863	9.53
1.10942	9.51
1.11022	9.5
1.11102	9.48
1.11182	9.45
1.11262	9.42
1.11342	9.37
1.11422	9.32
1.11502	9.26
1.11581	9.21
1.11661	9.16
1.11741	9.11
1.11821	9.06
1.11901	9
1.11981	8.94
1.12061	8.89
1.12141	8.82
1.1222	8.77
1.123	8.75
1.1238	8.74
1.1246	8.73
1.1254	8.72
1.1262	8.71
1.127	8.71
1.1278	8.71
1.12859	8.71
1.12939	8.71
1.13019	8.7
1.13099	8.71
1.13179	8.72
1.13259	8.73
1.13339	8.72
1.13419	8.71
1.13498	8.7
1.13578	8.67
1.13658	8.64
1.13738	8.62
1.13818	8.6
1.13898	8.58
1.13978	8.56
1.14058	8.55
1.14137	8.54
1.14217	8.53
1.14297	8.52
1.14377	8.51
1.14457	8.51
1.14537	8.5
1.14617	8.5
1.14696	8.49
1.14776	8.48
1.14856	8.47
1.14936	8.46
1.15016	8.45
1.15096	8.44
1.15176	8.43
1.15256	8.41
1.15335	8.39
1.15415	8.38
1.15495	8.37
1.15575	8.36
1.15655	8.35
1.15735	8.35
1.15815	8.34
1.15895	8.33
1.15974	8.32
1.16054	8.32
1.16134	8.32
1.16214	8.34
1.16294	8.38
1.16374	8.41
1.16454	8.42
1.16534	8.43
1.16613	8.43
1.16693	8.43
1.16773	8.43
1.16853	8.43
1.16933	8.43
1.17013	8.43
1.17093	8.42
1.17173	8.42
1.17252	8.41
1.17332	8.4
1.17412	8.39
1.17492	8.38
1.17572	8.37
1.17652	8.36
1.17732	8.35
1.17812	8.35
1.17891	8.35
1.17971	8.35
1.18051	8.35
1.18131	8.35
1.18211	8.35
1.18291	8.35
1.18371	8.35
1.1845	8.34
1.1853	8.33
1.1861	8.32
1.1869	8.31
1.1877	8.31
1.1885	8.31
1.1893	8.31
1.1901	8.31
1.19089	8.31
1.19169	8.31
1.19249	8.32
1.19329	8.32
1.19409	8.32
1.19489	8.32
1.19569	8.32
1.19649	8.32
1.19728	8.32
1.19808	8.32
1.19888	8.32
1.19968	8.31
1.20048	8.3
1.20128	8.29
1.20208	8.28
1.20288	8.27
1.20367	8.26
1.20447	8.25
1.20527	8.24
1.20607	8.23
1.20687	8.22
1.20767	8.2
1.20847	8.17
1.20927	8.15
1.21006	8.13
1.21086	8.12
1.21166	8.1
1.21246	8.09
1.21326	8.08
1.21406	8.08
1.21486	8.08
1.21565	8.08
1.21645	8.07
1.21725	8.06
1.21805	8.05
1.21885	8.04
1.21965	8.03
1.22045	8.02
1.22125	8.01
1.22204	8
1.22284	7.99
1.22364	7.99
1.22444	7.98
1.22524	7.97
1.22604	7.98
1.22684	7.98
1.22764	7.98
1.22843	7.98
1.22923	7.99
1.23003	8
1.23083	8.01
1.23163	8.01
1.23243	8.01
1.23323	8.02
1.23403	8.03
1.23482	8.03
1.23562	8.04
1.23642	8.04
1.23722	8.04
1.23802	8.03
1.23882	8.04
1.23962	8.05
1.24042	8.06
1.24121	8.09
1.24201	8.09
1.24281	8.06
1.24361	8.03
1.24441	8.01
1.24521	8.01
1.24601	8.01
1.24681	8.02
1.2476	8.02
1.2484	8.02
1.2492	8.02
1.25	8.02
1.2508	8.02
1.2516	8.02
1.2524	8.02
1.25319	8.03
1.25399	8.04
1.25479	8.05
1.25559	8.05
1.25639	8.06
1.25719	8.07
1.25799	8.08
1.25879	8.09
1.25958	8.09
1.26038	8.09
1.26118	8.09
1.26198	8.09
1.26278	8.08
1.26358	8.07
1.26438	8.06
1.26518	8.06
1.26597	8.06
1.26677	8.06
1.26757	8.06
1.26837	8.07
1.26917	8.08
1.26997	8.08
1.27077	8.09
1.27157	8.11
1.27236	8.14
1.27316	8.17
1.27396	8.21
1.27476	8.24
1.27556	8.26
1.27636	8.28
1.27716	8.3
1.27796	8.32
1.27875	8.34
1.27955	8.36
1.28035	8.4
1.28115	8.44
1.28195	8.49
1.28275	8.57
1.28355	8.69
1.28435	8.83
1.28514	8.96
1.28594	9.08
1.28674	9.2
1.28754	9.29
1.28834	9.35
1.28914	9.41
1.28994	9.46
1.29073	9.5
1.29153	9.57
1.29233	9.65
1.29313	9.73
1.29393	9.8
1.29473	9.87
1.29553	9.93
1.29633	9.98
1.29712	10.03
1.29792	10.09
1.29872	10.15
1.29952	10.2
1.30032	10.25
1.30112	10.32
1.30192	10.39
1.30272	10.49
1.30351	10.58
1.30431	10.64
1.30511	10.73
1.30591	10.79
1.30671	10.83
1.30751	10.87
1.30831	10.92
1.30911	10.96
1.3099	10.98
1.3107	11
1.3115	11.02
1.3123	11.06
1.3131	11.11
1.3139	11.19
1.3147	11.27
1.3155	11.36
1.31629	11.45
1.31709	11.54
1.31789	11.65
1.31869	11.74
1.31949	11.79
1.32029	11.85
1.32109	11.89
1.32188	11.89
1.32268	11.92
1.32348	11.96
1.32428	11.99
1.32508	12.03
1.32588	12.08
1.32668	12.1
1.32748	12.1
1.32827	12.12
1.32907	12.14
1.32987	12.16
1.33067	12.18
1.33147	12.2
1.33227	12.22
1.33307	12.25
1.33387	12.28
1.33466	12.31
1.33546	12.34
1.33626	12.38
1.33706	12.4
1.33786	12.42
1.33866	12.45
1.33946	12.47
1.34026	12.49
1.34105	12.5
1.34185	12.52
1.34265	12.54
1.34345	12.58
1.34425	12.62
1.34505	12.66
1.34585	12.69
1.34665	12.72
1.34744	12.75
1.34824	12.8
1.34904	12.83
1.34984	12.85
1.35064	12.88
1.35144	12.91
1.35224	12.95
1.35304	13
1.35383	13.02
1.35463	13.02
1.35543	13.02
1.35623	13.02
1.35703	13.02
1.35783	13.02
1.35863	13.04
1.35942	13.06
1.36022	13.07
1.36102	13.07
1.36182	13.06
1.36262	13.05
1.36342	12.99
1.36422	12.91
1.36502	12.81
1.36581	12.72
1.36661	12.64
1.36741	12.57
1.36821	12.53
1.36901	12.52
1.36981	12.53
1.37061	12.54
1.37141	12.57
1.3722	12.56
1.373	12.55
1.3738	12.52
1.3746	12.5
1.3754	12.47
1.3762	12.45
1.377	12.44
1.3778	12.45
1.37859	12.44
1.37939	12.42
1.38019	12.41
1.38099	12.4
1.38179	12.37
1.38259	12.34
1.38339	12.28
1.38419	12.22
1.38498	12.2
1.38578	12.16
1.38658	12.14
1.38738	12.13
1.38818	12.12
1.38898	12.1
1.38978	12.1
1.39058	12.11
1.39137	12.12
1.39217	12.13
1.39297	12.14
1.39377	12.14
1.39457	12.11
1.39537	12.08
1.39617	12.05
1.39696	12.01
1.39776	11.98
1.39856	11.92
1.39936	11.89
1.40016	11.89
1.40096	11.89
1.40176	11.9
1.40256	11.91
1.40335	11.93
1.40415	11.96
1.40495	12.01
1.40575	12.05
1.40655	12.06
1.40735	12.09
1.40815	12.13
1.40895	12.16
1.40974	12.21
1.41054	12.22
1.41134	12.23
1.41214	12.23
1.41294	12.23
1.41374	12.22
1.41454	12.21
1.41534	12.2
1.41613	12.19
1.41693	12.18
1.41773	12.18
1.41853	12.18
1.41933	12.18
1.42013	12.2
1.42093	12.22
1.42173	12.24
1.42252	12.26
1.42332	12.29
1.42412	12.31
1.42492	12.35
1.42572	12.37
1.42652	12.38
1.42732	12.38
1.42812	12.38
1.42891	12.36
1.42971	12.35
1.43051	12.36
1.43131	12.36
1.43211	12.35
1.43291	12.32
1.43371	12.28
1.4345	12.27
1.4353	12.28
1.4361	12.3
1.4369	12.32
1.4377	12.37
1.4385	12.43
1.4393	12.44
1.4401	12.43
1.44089	12.43
1.44169	12.43
1.44249	12.45
1.44329	12.46
1.44409	12.48
1.44489	12.48
1.44569	12.48
1.44649	12.49
1.44728	12.5
1.44808	12.5
1.44888	12.5
1.44968	12.5
1.45048	12.49
1.45128	12.48
1.45208	12.46
1.45288	12.43
1.45367	12.4
1.45447	12.38
1.45527	12.37
1.45607	12.36
1.45687	12.35
1.45767	12.34
1.45847	12.32
1.45927	12.31
1.46006	12.31
1.46086	12.31
1.46166	12.31
1.46246	12.32
1.46326	12.33
1.46406	12.34
1.46486	12.35
1.46565	12.35
1.46645	12.34
1.46725	12.34
1.46805	12.34
1.46885	12.34
1.46965	12.34
1.47045	12.33
1.47125	12.32
1.47204	12.31
1.47284	12.29
1.47364	12.26
1.47444	12.23
1.47524	12.21
1.47604	12.22
1.47684	12.29
1.47764	12.42
1.47843	12.51
1.47923	12.57
1.48003	12.57
1.48083	12.54
1.48163	12.5
1.48243	12.46
1.48323	12.44
1.48403	12.41
1.48482	12.37
1.48562	12.31
1.48642	12.25
1.48722	12.21
1.48802	12.19
1.48882	12.18
1.48962	12.17
1.49042	12.14
1.49121	12.14
1.49201	12.13
1.49281	12.13
1.49361	12.14
1.49441	12.16
1.49521	12.18
1.49601	12.2
1.49681	12.23
1.4976	12.27
1.4984	12.33
1.4992	12.43
1.5	12.54
1.5008	12.64
1.5016	12.73
1.5024	12.83
1.50319	12.9
1.50399	12.93
1.50479	12.93
1.50559	12.9
1.50639	12.89
1.50719	12.9
1.50799	12.92
1.50879	12.93
1.50958	12.94
1.51038	12.95
1.51118	12.95
1.51198	12.96
1.51278	12.97
1.51358	12.97
1.51438	12.96
1.51518	12.96
1.51597	12.96
1.51677	12.97
1.51757	13
1.51837	12.99
1.51917	12.96
1.51997	12.96
1.52077	12.98
1.52157	13
1.52236	13.02
1.52316	13.02
1.52396	13.01
1.52476	13
1.52556	13
1.52636	13
1.52716	12.98
1.52796	12.96
1.52875	12.94
1.52955	12.92
1.53035	12.9
1.53115	12.87
1.53195	12.84
1.53275	12.81
1.53355	12.8
1.53435	12.79
1.53514	12.78
1.53594	12.76
1.53674	12.74
1.53754	12.72
1.53834	12.7
1.53914	12.69
1.53994	12.68
1.54073	12.68
1.54153	12.69
1.54233	12.7
1.54313	12.72
1.54393	12.74
1.54473	12.75
1.54553	12.75
1.54633	12.75
1.54712	12.75
1.54792	12.75
1.54872	12.75
1.54952	12.75
1.55032	12.75
1.55112	12.77
1.55192	12.81
1.55272	12.85
1.55351	12.89
1.55431	12.92
1.55511	12.96
1.55591	12.99
1.55671	12.99
1.55751	12.93
1.55831	12.83
1.55911	12.75
1.5599	12.72
1.5607	12.72
1.5615	12.74
1.5623	12.76
1.5631	12.77
1.5639	12.77
1.5647	12.79
1.5655	12.81
1.56629	12.82
1.56709	12.83
1.56789	12.84
1.56869	12.84
1.56949	12.83
1.57029	12.83
1.57109	12.84
1.57188	12.86
1.57268	12.88
1.57348	12.89
1.57428	12.9
1.57508	12.91
1.57588	12.91
1.57668	12.92
1.57748	12.94
1.57827	12.97
1.57907	12.99
1.57987	12.98
1.58067	12.96
1.58147	12.97
1.58227	13
1.58307	13.01
1.58387	13.02
1.58466	13.08
1.58546	13.18
1.58626	13.29
1.58706	13.39
1.58786	13.5
1.58866	13.61
1.58946	13.77
1.59026	13.88
1.59105	13.97
1.59185	14.05
1.59265	14.11
1.59345	14.17
1.59425	14.22
1.59505	14.25
1.59585	14.28
[truncated: 1,082 more rows]

## Sheet: 2D
Note: Hairs were scanned from root (0 cm) to tip, but are graphed from tip (as 0 cm) to root. Therefore, all hairs are reversed when graphed.
Distance (cm)	Intensity (A.U.)
0	182.46
0.0008	183.29
0.0016	183.86
0.0024	184.22
0.0032	184.6
0.004	184.91
0.0048	185.2
0.0056	185.44
0.0064	185.63
0.0072	185.77
0.008	185.87
0.0088	185.91
0.0096	186
0.0104	186.06
0.0112	186.14
0.012	186.2
0.0127	186.31
0.0135	186.36
0.0143	186.44
0.0151	186.51
0.0159	186.63
0.0167	186.75
0.0175	186.95
0.0183	187.17
0.0191	187.34
0.0199	187.48
0.0207	187.59
0.0215	187.66
0.0223	187.79
0.0231	187.94
0.0239	188.15
0.0247	188.37
0.0255	188.6
0.0263	188.84
0.0271	189.03
0.0279	189.19
0.0287	189.3
0.0295	189.37
0.0303	189.45
0.0311	189.5
0.0319	189.57
0.0327	189.66
0.0335	189.78
0.0343	189.86
0.0351	189.92
0.0359	190.01
0.0366	190.11
0.0374	190.24
0.0382	190.38
0.039	190.47
0.0398	190.61
0.0406	190.77
0.0414	190.93
0.0422	191.05
0.043	191.17
0.0438	191.17
0.0446	191.21
0.0454	191.35
0.0462	191.47
0.047	191.65
0.0478	191.77
0.0486	191.86
0.0494	191.94
0.0502	192.03
0.051	192.09
0.0518	192.12
0.0526	192.12
0.0534	192.17
0.0542	192.24
0.055	192.25
0.0558	192.27
0.0566	192.29
0.0574	192.31
0.0582	192.3
0.059	192.37
0.0598	192.39
0.0605	192.44
0.0613	192.52
0.0621	192.51
0.0629	192.45
0.0637	192.37
0.0645	192.26
0.0653	192.18
0.0661	192.12
0.0669	192.08
0.0677	191.96
0.0685	191.88
0.0693	191.83
0.0701	191.79
0.0709	191.74
0.0717	191.72
0.0725	191.73
0.0733	191.7
0.0741	191.69
0.0749	191.7
0.0757	191.72
0.0765	191.74
0.0773	191.7
0.0781	191.71
0.0789	191.79
0.0797	191.92
0.0805	192.1
0.0813	192.24
0.0821	192.35
0.0829	192.52
0.0837	192.62
0.0844	192.66
0.0852	192.65
0.086	192.64
0.0868	192.64
0.0876	192.73
0.0884	192.82
0.0892	192.87
0.09	192.91
0.0908	192.91
0.0916	192.9
0.0924	192.88
0.0932	192.84
0.094	192.73
0.0948	192.64
0.0956	192.49
0.0964	192.33
0.0972	192.14
0.098	191.95
0.0988	191.83
0.0996	191.75
0.1004	191.65
0.1012	191.55
0.102	191.38
0.1028	191.21
0.1036	191
0.1044	190.88
0.1052	190.77
0.106	190.7
0.1068	190.65
0.1076	190.59
0.1083	190.57
0.1091	190.51
0.1099	190.42
0.1107	190.3
0.1115	190.14
0.1123	189.96
0.1131	189.78
0.1139	189.73
0.1147	189.76
0.1155	189.74
0.1163	189.67
0.1171	189.57
0.1179	189.43
0.1187	189.38
0.1195	189.32
0.1203	189.26
0.1211	189.19
0.1219	189.15
0.1227	189.09
0.1235	189.08
0.1243	189
0.1251	188.87
0.1259	188.76
0.1267	188.61
0.1275	188.45
0.1283	188.3
0.1291	188.25
0.1299	188.23
0.1307	188.22
0.1315	188.2
0.1322	188.14
0.133	188.04
0.1338	187.89
0.1346	187.81
0.1354	187.77
0.1362	187.8
0.137	187.89
0.1378	187.94
0.1386	187.95
0.1394	188.04
0.1402	188.06
0.141	188.07
0.1418	188.16
0.1426	188.27
0.1434	188.38
0.1442	188.5
0.145	188.6
0.1458	188.67
0.1466	188.76
0.1474	188.87
0.1482	189.02
0.149	189.1
0.1498	189.13
0.1506	189.15
0.1514	189.13
0.1522	189.05
0.153	189
0.1538	188.95
0.1546	188.95
0.1554	188.98
0.1562	188.97
0.1569	188.96
0.1577	188.92
0.1585	188.84
0.1593	188.75
0.1601	188.64
0.1609	188.45
0.1617	188.22
0.1625	187.92
0.1633	187.67
0.1641	187.46
0.1649	187.3
0.1657	187.15
0.1665	186.99
0.1673	186.76
0.1681	186.55
0.1689	186.36
0.1697	186.19
0.1705	186.04
0.1713	185.89
0.1721	185.73
0.1729	185.6
0.1737	185.49
0.1745	185.42
0.1753	185.38
0.1761	185.34
0.1769	185.29
0.1777	185.24
0.1785	185.16
0.1793	185.06
0.1801	184.98
0.1808	184.91
0.1816	184.86
0.1824	184.86
0.1832	184.83
0.184	184.74
0.1848	184.65
0.1856	184.51
0.1864	184.38
0.1872	184.28
0.188	184.17
0.1888	184.06
0.1896	183.96
0.1904	183.86
0.1912	183.77
0.192	183.72
0.1928	183.65
0.1936	183.47
0.1944	183.25
0.1952	183.11
0.196	183
0.1968	182.92
0.1976	182.87
0.1984	182.81
0.1992	182.76
0.2	182.72
0.2008	182.73
0.2016	182.72
0.2024	182.72
0.2032	182.71
0.204	182.75
0.2047	182.82
0.2055	182.86
0.2063	182.93
0.2071	183.07
0.2079	183.21
0.2087	183.25
0.2095	183.27
0.2103	183.34
0.2111	183.45
0.2119	183.58
0.2127	183.67
0.2135	183.78
0.2143	183.83
0.2151	183.83
0.2159	183.81
0.2167	183.77
0.2175	183.75
0.2183	183.69
0.2191	183.58
0.2199	183.49
0.2207	183.42
0.2215	183.41
0.2223	183.45
0.2231	183.55
0.2239	183.68
0.2247	183.77
0.2255	183.85
0.2263	183.94
0.2271	184.06
0.2279	184.18
0.2286	184.34
0.2294	184.58
0.2302	184.8
0.231	185.08
0.2318	185.35
0.2326	185.66
0.2334	186
0.2342	186.28
0.235	186.59
0.2358	186.94
0.2366	187.26
0.2374	187.56
0.2382	187.84
0.239	188.11
0.2398	188.35
0.2406	188.64
0.2414	188.97
0.2422	189.3
0.243	189.63
0.2438	189.92
0.2446	190.19
0.2454	190.47
0.2462	190.72
0.247	191.03
0.2478	191.34
0.2486	191.67
0.2494	192.04
0.2502	192.38
0.251	192.71
0.2518	193.1
0.2525	193.46
0.2533	193.83
0.2541	194.2
0.2549	194.49
0.2557	194.79
0.2565	195.15
0.2573	195.54
0.2581	195.92
0.2589	196.33
0.2597	196.69
0.2605	197.04
0.2613	197.45
0.2621	197.85
0.2629	198.29
0.2637	198.71
0.2645	199.06
0.2653	199.38
0.2661	199.7
0.2669	200.03
0.2677	200.37
0.2685	200.75
0.2693	201.11
0.2701	201.53
0.2709	201.91
0.2717	202.22
0.2725	202.55
0.2733	202.91
0.2741	203.24
0.2749	203.49
0.2757	203.78
0.2764	204.07
0.2772	204.33
0.278	204.56
0.2788	204.81
0.2796	205.09
0.2804	205.33
0.2812	205.56
0.282	205.76
0.2828	205.92
0.2836	206.06
0.2844	206.21
0.2852	206.39
0.286	206.57
0.2868	206.74
0.2876	206.94
0.2884	207.17
0.2892	207.38
0.29	207.53
0.2908	207.66
0.2916	207.8
0.2924	208.03
0.2932	208.29
0.294	208.59
0.2948	208.86
0.2956	209.11
0.2964	209.32
0.2972	209.52
0.298	209.73
0.2988	209.95
0.2996	210.15
0.3004	210.3
0.3011	210.4
0.3019	210.46
0.3027	210.49
0.3035	210.5
0.3043	210.54
0.3051	210.57
0.3059	210.57
0.3067	210.58
0.3075	210.63
0.3083	210.66
0.3091	210.63
0.3099	210.64
0.3107	210.65
0.3115	210.68
0.3123	210.63
0.3131	210.6
0.3139	210.57
0.3147	210.53
0.3155	210.44
0.3163	210.36
0.3171	210.3
0.3179	210.27
0.3187	210.26
0.3195	210.28
0.3203	210.3
0.3211	210.34
0.3219	210.38
0.3227	210.4
0.3235	210.48
0.3243	210.64
0.325	210.7
0.3258	210.75
0.3266	210.82
0.3274	210.86
0.3282	210.89
0.329	210.88
0.3298	210.9
0.3306	210.97
0.3314	210.98
0.3322	211
0.333	211.03
0.3338	211.03
0.3346	211.1
0.3354	211.17
0.3362	211.16
0.337	211.1
0.3378	211.09
0.3386	211.04
0.3394	211.04
0.3402	211
0.341	210.93
0.3418	210.89
0.3426	210.87
0.3434	210.85
0.3442	210.85
0.345	210.89
0.3458	210.95
0.3466	211
0.3474	211.02
0.3482	211
0.3489	210.94
0.3497	210.81
0.3505	210.71
0.3513	210.69
0.3521	210.63
0.3529	210.57
0.3537	210.51
0.3545	210.54
0.3553	210.56
0.3561	210.6
0.3569	210.68
0.3577	210.69
0.3585	210.66
0.3593	210.61
0.3601	210.57
0.3609	210.54
0.3617	210.53
0.3625	210.56
0.3633	210.63
0.3641	210.7
0.3649	210.7
0.3657	210.64
0.3665	210.59
0.3673	210.49
0.3681	210.39
0.3689	210.33
0.3697	210.28
0.3705	210.24
0.3713	210.23
0.3721	210.15
0.3728	210.1
0.3736	210.05
0.3744	209.99
0.3752	209.98
0.376	209.93
0.3768	209.87
0.3776	209.82
0.3784	209.78
0.3792	209.79
0.38	209.87
0.3808	209.94
0.3816	210.02
0.3824	210.08
0.3832	210.11
0.384	210.13
0.3848	210.19
0.3856	210.25
0.3864	210.28
0.3872	210.28
0.388	210.3
0.3888	210.32
0.3896	210.36
0.3904	210.34
0.3912	210.34
0.392	210.41
0.3928	210.42
0.3936	210.44
0.3944	210.46
0.3952	210.51
0.396	210.6
0.3967	210.7
0.3975	210.72
0.3983	210.73
0.3991	210.77
0.3999	210.82
0.4007	210.9
0.4015	210.94
0.4023	210.92
0.4031	210.9
0.4039	210.78
0.4047	210.74
0.4055	210.72
0.4063	210.64
0.4071	210.62
0.4079	210.63
0.4087	210.6
0.4095	210.55
0.4103	210.48
0.4111	210.44
0.4119	210.43
0.4127	210.47
0.4135	210.46
0.4143	210.4
0.4151	210.36
0.4159	210.32
0.4167	210.31
0.4175	210.29
0.4183	210.23
0.4191	210.17
0.4199	210.14
0.4207	210.08
0.4214	210
0.4222	209.87
0.423	209.74
0.4238	209.67
0.4246	209.62
0.4254	209.5
0.4262	209.41
0.427	209.32
0.4278	209.27
0.4286	209.34
0.4294	209.45
0.4302	209.56
0.431	209.7
0.4318	209.82
0.4326	209.92
0.4334	210.04
0.4342	210.06
0.435	210.07
0.4358	210.03
0.4366	209.92
0.4374	209.89
0.4382	209.86
0.439	209.76
0.4398	209.64
0.4406	209.53
0.4414	209.44
0.4422	209.34
0.443	209.26
0.4438	209.11
0.4446	209.07
0.4453	209.09
0.4461	209.09
0.4469	209.14
0.4477	209.16
0.4485	209.12
0.4493	209.11
0.4501	209.12
0.4509	209.11
0.4517	209.17
0.4525	209.2
0.4533	209.18
0.4541	209.24
0.4549	209.22
0.4557	209.24
0.4565	209.27
0.4573	209.3
0.4581	209.35
0.4589	209.4
0.4597	209.43
0.4605	209.46
0.4613	209.48
0.4621	209.46
0.4629	209.48
0.4637	209.56
0.4645	209.59
0.4653	209.58
0.4661	209.59
0.4669	209.6
0.4677	209.61
0.4685	209.66
0.4692	209.69
0.47	209.68
0.4708	209.65
0.4716	209.56
0.4724	209.48
0.4732	209.44
0.474	209.37
0.4748	209.29
0.4756	209.17
0.4764	209.01
0.4772	208.95
0.478	208.94
0.4788	208.89
0.4796	208.8
0.4804	208.69
0.4812	208.6
0.482	208.58
0.4828	208.61
0.4836	208.68
0.4844	208.72
0.4852	208.73
0.486	208.75
0.4868	208.73
0.4876	208.69
0.4884	208.66
0.4892	208.65
0.49	208.65
0.4908	208.63
0.4916	208.63
0.4924	208.55
0.4931	208.46
0.4939	208.4
0.4947	208.34
0.4955	208.26
0.4963	208.26
0.4971	208.21
0.4979	208.2
0.4987	208.19
0.4995	208.18
0.5003	208.16
0.5011	208.18
0.5019	208.2
0.5027	208.21
0.5035	208.23
0.5043	208.18
0.5051	208.16
0.5059	208.14
0.5067	208.11
0.5075	208.09
0.5083	208.04
0.5091	207.97
0.5099	207.95
0.5107	207.84
0.5115	207.75
0.5123	207.69
0.5131	207.64
0.5139	207.55
0.5147	207.45
0.5155	207.36
0.5163	207.28
0.517	207.19
0.5178	207.11
0.5186	207.06
0.5194	207.01
0.5202	206.98
0.521	206.91
0.5218	206.89
0.5226	206.85
0.5234	206.86
0.5242	206.8
0.525	206.75
0.5258	206.71
0.5266	206.64
0.5274	206.57
0.5282	206.51
0.529	206.46
0.5298	206.38
0.5306	206.31
0.5314	206.23
0.5322	206.13
0.533	206.03
0.5338	205.9
0.5346	205.78
0.5354	205.7
0.5362	205.67
0.537	205.59
0.5378	205.47
0.5386	205.33
0.5394	205.21
0.5402	205.07
0.5409	204.94
0.5417	204.86
0.5425	204.76
0.5433	204.61
0.5441	204.45
0.5449	204.35
0.5457	204.26
0.5465	204.12
0.5473	204
0.5481	203.85
0.5489	203.65
0.5497	203.54
0.5505	203.48
0.5513	203.44
0.5521	203.41
0.5529	203.37
0.5537	203.32
0.5545	203.27
0.5553	203.24
0.5561	203.19
0.5569	203.16
0.5577	203.06
0.5585	202.97
0.5593	202.95
0.5601	202.92
0.5609	202.92
0.5617	202.91
0.5625	202.76
0.5633	202.55
0.5641	202.43
0.5649	202.34
0.5656	202.28
0.5664	202.26
0.5672	202.19
0.568	202.11
0.5688	202.04
0.5696	201.95
0.5704	201.87
0.5712	201.8
0.572	201.74
0.5728	201.75
0.5736	201.75
0.5744	201.73
0.5752	201.77
0.576	201.72
0.5768	201.63
0.5776	201.56
0.5784	201.48
0.5792	201.41
0.58	201.44
0.5808	201.42
0.5816	201.4
0.5824	201.46
0.5832	201.49
0.584	201.54
0.5848	201.62
0.5856	201.61
0.5864	201.61
0.5872	201.63
0.588	201.64
0.5888	201.65
0.5895	201.68
0.5903	201.69
0.5911	201.69
0.5919	201.68
0.5927	201.6
0.5935	201.6
0.5943	201.62
0.5951	201.69
0.5959	201.82
0.5967	201.95
0.5975	202.04
0.5983	202.14
0.5991	202.28
0.5999	202.39
0.6007	202.5
0.6015	202.63
0.6023	202.72
0.6031	202.79
0.6039	202.85
0.6047	202.86
0.6055	202.89
0.6063	202.93
0.6071	202.99
0.6079	203.08
0.6087	203.11
0.6095	203.16
0.6103	203.21
0.6111	203.23
0.6119	203.26
0.6127	203.3
0.6134	203.28
0.6142	203.29
0.615	203.3
0.6158	203.25
0.6166	203.26
0.6174	203.34
0.6182	203.35
0.619	203.35
0.6198	203.41
0.6206	203.46
0.6214	203.5
0.6222	203.53
0.623	203.59
0.6238	203.67
0.6246	203.72
0.6254	203.78
0.6262	203.91
0.627	204
0.6278	204.09
0.6286	204.2
0.6294	204.27
0.6302	204.36
0.631	204.5
0.6318	204.61
0.6326	204.65
0.6334	204.73
0.6342	204.79
0.635	204.87
0.6358	205.04
0.6366	205.12
0.6373	205.2
0.6381	205.27
0.6389	205.29
0.6397	205.32
0.6405	205.36
0.6413	205.41
0.6421	205.53
0.6429	205.73
0.6437	205.86
0.6445	205.96
0.6453	206.06
0.6461	206.12
0.6469	206.21
0.6477	206.32
0.6485	206.42
0.6493	206.52
0.6501	206.61
0.6509	206.68
0.6517	206.83
0.6525	206.92
0.6533	207.03
0.6541	207.13
0.6549	207.2
0.6557	207.27
0.6565	207.4
0.6573	207.54
0.6581	207.68
0.6589	207.82
0.6597	207.88
0.6605	207.92
0.6612	207.98
0.662	207.99
0.6628	207.99
0.6636	208
0.6644	207.97
0.6652	207.97
0.666	208
0.6668	208
0.6676	207.99
0.6684	208.03
0.6692	208
0.67	208.05
0.6708	208.13
0.6716	208.16
0.6724	208.25
0.6732	208.34
0.674	208.39
0.6748	208.39
0.6756	208.36
0.6764	208.29
0.6772	208.26
0.678	208.24
0.6788	208.17
0.6796	208.08
0.6804	208.03
0.6812	207.92
0.682	207.86
0.6828	207.8
0.6836	207.76
0.6844	207.81
0.6851	207.77
0.6859	207.72
0.6867	207.72
0.6875	207.69
0.6883	207.71
0.6891	207.72
0.6899	207.68
0.6907	207.65
0.6915	207.63
0.6923	207.58
0.6931	207.59
0.6939	207.61
0.6947	207.63
0.6955	207.65
0.6963	207.71
0.6971	207.66
0.6979	207.72
0.6987	207.76
0.6995	207.73
0.7003	207.73
0.7011	207.77
0.7019	207.82
0.7027	207.82
0.7035	207.84
0.7043	207.9
0.7051	207.95
0.7059	207.95
0.7067	207.97
0.7075	207.98
0.7083	208.02
0.7091	208.06
0.7098	208.09
0.7106	208.08
0.7114	208.07
0.7122	208.13
0.713	208.11
0.7138	208.02
0.7146	207.92
0.7154	207.69
0.7162	207.48
0.717	207.38
0.7178	207.33
0.7186	207.31
0.7194	207.32
0.7202	207.3
0.721	207.24
0.7218	207.19
0.7226	207.08
0.7234	206.95
0.7242	206.85
0.725	206.69
0.7258	206.64
0.7266	206.55
0.7274	206.49
0.7282	206.46
0.729	206.45
0.7298	206.42
0.7306	206.41
0.7314	206.27
0.7322	206.17
0.733	206.1
0.7337	206.06
0.7345	206.02
0.7353	205.98
0.7361	205.88
0.7369	205.72
0.7377	205.58
0.7385	205.4
0.7393	205.23
0.7401	205.18
0.7409	205.07
0.7417	205
0.7425	204.95
0.7433	204.87
0.7441	204.83
0.7449	204.83
0.7457	204.79
0.7465	204.77
0.7473	204.77
0.7481	204.71
0.7489	204.64
0.7497	204.54
0.7505	204.42
0.7513	204.38
0.7521	204.34
0.7529	204.28
0.7537	204.21
0.7545	204.13
0.7553	204.06
0.7561	204.04
0.7569	204
0.7576	203.97
0.7584	203.89
0.7592	203.86
0.76	203.81
0.7608	203.77
0.7616	203.69
0.7624	203.59
0.7632	203.51
0.764	203.34
0.7648	203.26
0.7656	203.21
0.7664	203.1
0.7672	203.02
0.768	203.01
0.7688	202.94
0.7696	202.87
0.7704	202.81
0.7712	202.74
0.772	202.68
0.7728	202.68
0.7736	202.64
0.7744	202.55
0.7752	202.5
0.776	202.39
0.7768	202.36
0.7776	202.29
0.7784	202.22
0.7792	202.18
0.78	202.11
0.7808	201.97
0.7815	201.85
0.7823	201.76
0.7831	201.65
0.7839	201.53
0.7847	201.39
0.7855	201.26
0.7863	201.13
0.7871	201.03
0.7879	200.9
0.7887	200.78
0.7895	200.61
0.7903	200.42
0.7911	200.27
0.7919	200.06
0.7927	199.89
0.7935	199.82
0.7943	199.78
0.7951	199.79
0.7959	199.85
0.7967	199.86
0.7975	199.81
0.7983	199.77
0.7991	199.67
0.7999	199.53
0.8007	199.44
0.8015	199.33
0.8023	199.22
0.8031	199.22
0.8039	199.22
0.8047	199.24
0.8054	199.15
0.8062	199.13
0.807	199.09
0.8078	199.04
0.8086	198.93
0.8094	198.9
0.8102	198.83
0.811	198.81
0.8118	198.82
0.8126	198.76
0.8134	198.7
0.8142	198.61
0.815	198.54
0.8158	198.52
0.8166	198.59
0.8174	198.64
0.8182	198.69
0.819	198.75
0.8198	198.68
0.8206	198.62
0.8214	198.53
0.8222	198.46
0.823	198.45
0.8238	198.49
0.8246	198.49
0.8254	198.51
0.8262	198.5
0.827	198.48
0.8278	198.46
0.8286	198.46
0.8293	198.46
0.8301	198.48
0.8309	198.52
0.8317	198.54
0.8325	198.51
0.8333	198.52
0.8341	198.52
0.8349	198.48
0.8357	198.47
0.8365	198.45
0.8373	198.4
0.8381	198.42
0.8389	198.41
0.8397	198.36
0.8405	198.39
0.8413	198.35
0.8421	198.36
0.8429	198.36
0.8437	198.36
0.8445	198.31
0.8453	198.25
0.8461	198.23
0.8469	198.18
0.8477	198.02
0.8485	197.94
0.8493	197.85
0.8501	197.81
0.8509	197.78
0.8517	197.73
0.8525	197.62
0.8533	197.55
0.854	197.54
0.8548	197.53
0.8556	197.52
0.8564	197.53
0.8572	197.54
0.858	197.55
0.8588	197.55
0.8596	197.53
0.8604	197.53
0.8612	197.49
0.862	197.45
0.8628	197.43
0.8636	197.45
0.8644	197.44
0.8652	197.41
0.866	197.4
0.8668	197.4
0.8676	197.38
0.8684	197.39
0.8692	197.32
0.87	197.22
0.8708	197.1
0.8716	197.01
0.8724	196.96
0.8732	196.88
0.874	196.79
0.8748	196.76
0.8756	196.7
0.8764	196.6
0.8772	196.49
0.8779	196.36
0.8787	196.27
0.8795	196.21
0.8803	196.13
0.8811	196.02
0.8819	195.91
0.8827	195.74
0.8835	195.55
0.8843	195.37
0.8851	195.22
0.8859	195.06
0.8867	194.91
0.8875	194.76
0.8883	194.68
0.8891	194.53
0.8899	194.34
0.8907	194.16
0.8915	193.96
0.8923	193.76
0.8931	193.52
0.8939	193.34
0.8947	193.15
0.8955	192.95
0.8963	192.74
0.8971	192.55
0.8979	192.42
0.8987	192.35
0.8995	192.26
0.9003	192.2
0.9011	192.13
0.9018	192.01
0.9026	191.82
0.9034	191.58
0.9042	191.36
0.905	191.12
0.9058	190.93
0.9066	190.72
0.9074	190.55
0.9082	190.38
0.909	190.16
0.9098	189.91
0.9106	189.65
0.9114	189.41
0.9122	189.24
0.913	189.13
0.9138	189.02
0.9146	188.99
0.9154	188.93
0.9162	188.86
0.917	188.81
0.9178	188.74
0.9186	188.72
0.9194	188.77
0.9202	188.77
0.921	188.81
0.9218	188.81
0.9226	188.8
0.9234	188.76
0.9242	188.74
0.925	188.69
0.9257	188.59
0.9265	188.48
0.9273	188.39
0.9281	188.27
0.9289	188.21
0.9297	188.1
0.9305	187.96
0.9313	187.84
0.9321	187.69
0.9329	187.5
0.9337	187.31
0.9345	187.09
0.9353	186.89
0.9361	186.64
0.9369	186.37
0.9377	186.09
0.9385	185.85
0.9393	185.62
0.9401	185.38
0.9409	185.22
0.9417	185.03
0.9425	184.81
0.9433	184.47
0.9441	184.16
0.9449	183.87
0.9457	183.61
0.9465	183.38
0.9473	183.2
0.9481	182.98
0.9489	182.85
0.9496	182.77
0.9504	182.71
0.9512	182.66
0.952	182.62
0.9528	182.55
0.9536	182.42
0.9544	182.28
0.9552	182.22
0.956	182.12
0.9568	182.08
0.9576	182.06
0.9584	181.99
0.9592	181.89
0.96	181.82
0.9608	181.79
0.9616	181.79
0.9624	181.81
0.9632	181.83
0.964	181.88
0.9648	181.93
0.9656	181.96
0.9664	181.94
0.9672	181.91
0.968	181.91
0.9688	181.94
0.9696	181.99
0.9704	182.02
0.9712	182.03
0.972	182.01
0.9728	181.98
0.9736	181.91
0.9743	181.83
0.9751	181.75
0.9759	181.68
0.9767	181.63
0.9775	181.5
0.9783	181.26
0.9791	181.07
0.9799	180.86
0.9807	180.67
0.9815	180.5
0.9823	180.41
0.9831	180.34
0.9839	180.32
0.9847	180.34
0.9855	180.32
0.9863	180.3
0.9871	180.21
0.9879	180.14
0.9887	180.17
0.9895	180.2
0.9903	180.23
0.9911	180.22
0.9919	180.16
0.9927	180.06
0.9935	179.95
0.9943	179.78
0.9951	179.58
0.9959	179.43
0.9967	179.27
0.9975	179.16
0.9982	179.07
0.999	178.96
0.9998	178.8
1.0006	178.65
1.0014	178.51
1.0022	178.35
1.003	178.25
1.0038	178.13
1.0046	178.01
1.0054	177.93
1.0062	177.93
1.007	177.97
1.0078	178
1.0086	178.02
1.0094	178
1.0102	177.93
1.011	177.87
1.0118	177.85
1.0126	177.79
1.0134	177.71
1.0142	177.67
1.015	177.63
1.0158	177.58
1.0166	177.55
1.0174	177.51
1.0182	177.48
1.019	177.49
1.0198	177.54
1.0206	177.55
1.0214	177.56
1.0221	177.57
1.0229	177.67
1.0237	177.74
1.0245	177.81
1.0253	177.82
1.0261	177.72
1.0269	177.59
1.0277	177.5
1.0285	177.44
1.0293	177.39
1.0301	177.34
1.0309	177.26
1.0317	177.12
1.0325	177.07
1.0333	177.07
1.0341	177.13
1.0349	177.15
1.0357	177.2
1.0365	177.2
1.0373	177.18
1.0381	177.16
1.0389	177.33
1.0397	177.42
1.0405	177.48
1.0413	177.49
1.0421	177.46
1.0429	177.46
1.0437	177.45
1.0445	177.4
1.0453	177.35
1.046	177.32
1.0468	177.28
1.0476	177.18
1.0484	177.08
1.0492	177.03
1.05	176.98
1.0508	176.89
1.0516	176.85
1.0524	176.84
1.0532	176.88
1.054	176.89
1.0548	176.9
1.0556	176.84
1.0564	176.69
1.0572	176.6
1.058	176.57
1.0588	176.57
1.0596	176.64
1.0604	176.67
1.0612	176.7
1.062	176.67
1.0628	176.61
1.0636	176.47
1.0644	176.31
1.0652	176.19
1.066	176.06
1.0668	175.99
1.0676	175.93
1.0684	175.75
1.0692	175.6
1.0699	175.41
1.0707	175.25
1.0715	175.11
1.0723	174.96
1.0731	174.84
1.0739	174.7
1.0747	174.58
1.0755	174.46
1.0763	174.37
1.0771	174.26
1.0779	174.05
1.0787	173.85
1.0795	173.63
1.0803	173.44
1.0811	173.27
1.0819	173.13
1.0827	173.01
1.0835	172.91
1.0843	172.83
1.0851	172.77
1.0859	172.7
1.0867	172.6
1.0875	172.52
1.0883	172.44
1.0891	172.38
1.0899	172.36
1.0907	172.38
1.0915	172.38
1.0923	172.44
1.0931	172.54
1.0938	172.58
1.0946	172.6
1.0954	172.67
1.0962	172.76
1.097	172.84
1.0978	172.84
1.0986	172.8
1.0994	172.74
1.1002	172.68
1.101	172.6
1.1018	172.53
1.1026	172.44
1.1034	172.4
1.1042	172.39
1.105	172.4
1.1058	172.45
1.1066	172.5
1.1074	172.52
1.1082	172.54
1.109	172.57
1.1098	172.56
1.1106	172.58
1.1114	172.64
1.1122	172.65
1.113	172.67
1.1138	172.6
1.1146	172.5
1.1154	172.41
1.1162	172.35
1.117	172.27
1.1178	172.19
1.1185	171.93
1.1193	171.77
1.1201	171.62
1.1209	171.49
1.1217	171.43
1.1225	171.34
1.1233	171.27
1.1241	171.21
1.1249	171.12
1.1257	171.05
1.1265	171.03
1.1273	171.02
1.1281	171.01
1.1289	170.93
1.1297	170.86
1.1305	170.86
1.1313	170.86
1.1321	170.89
1.1329	170.89
1.1337	170.92
1.1345	170.95
1.1353	171.04
1.1361	171.21
1.1369	171.39
1.1377	171.59
1.1385	171.74
1.1393	171.84
1.1401	171.96
1.1409	172.09
1.1417	172.27
1.1424	172.45
1.1432	172.65
1.144	172.88
1.1448	173.09
1.1456	173.33
1.1464	173.51
1.1472	173.7
1.148	173.97
1.1488	174.23
1.1496	174.47
1.1504	174.68
1.1512	174.88
1.152	175.09
1.1528	175.36
1.1536	175.67
1.1544	175.98
1.1552	176.25
1.156	176.48
1.1568	176.71
1.1576	176.97
1.1584	177.23
1.1592	177.51
1.16	177.79
1.1608	178.09
1.1616	178.35
1.1624	178.56
1.1632	178.8
1.164	179.01
1.1648	179.19
1.1656	179.38
1.1663	179.56
1.1671	179.74
1.1679	179.93
1.1687	180.17
1.1695	180.5
1.1703	180.78
1.1711	181.02
1.1719	181.23
1.1727	181.35
1.1735	181.51
1.1743	181.7
1.1751	181.85
1.1759	182.01
1.1767	182.21
1.1775	182.44
1.1783	182.7
1.1791	183.01
1.1799	183.37
1.1807	183.78
1.1815	184.19
1.1823	184.57
1.1831	184.9
1.1839	185.18
1.1847	185.51
1.1855	185.85
1.1863	186.23
1.1871	186.62
1.1879	186.96
1.1887	187.36
1.1895	187.71
1.1902	188.05
1.191	188.33
1.1918	188.64
1.1926	188.93
1.1934	189.24
1.1942	189.54
1.195	189.83
1.1958	190.09
1.1966	190.39
1.1974	190.74
1.1982	191.13
1.199	191.45
1.1998	191.81
1.2006	192.15
1.2014	192.41
1.2022	192.62
1.203	192.8
1.2038	193.05
1.2046	193.34
1.2054	193.63
1.2062	193.92
1.207	194.22
1.2078	194.54
1.2086	194.9
1.2094	195.24
1.2102	195.59
1.211	195.96
1.2118	196.31
1.2126	196.7
1.2134	197.09
1.2141	197.47
1.2149	197.81
1.2157	198.1
1.2165	198.42
1.2173	198.74
1.2181	199.06
1.2189	199.36
1.2197	199.67
1.2205	199.93
1.2213	200.16
1.2221	200.45
1.2229	200.71
1.2237	200.92
1.2245	201.08
1.2253	201.23
1.2261	201.44
1.2269	201.64
1.2277	201.78
1.2285	201.88
1.2293	201.99
1.2301	202.16
1.2309	202.38
1.2317	202.61
1.2325	202.73
1.2333	202.84
1.2341	202.95
1.2349	203.11
1.2357	203.31
1.2365	203.5
1.2373	203.69
1.238	203.85
1.2388	204.07
1.2396	204.32
1.2404	204.55
1.2412	204.82
1.242	205.07
1.2428	205.35
1.2436	205.64
1.2444	205.93
1.2452	206.2
1.246	206.46
1.2468	206.69
1.2476	206.93
1.2484	207.13
1.2492	207.26
1.25	207.42
1.2508	207.61
1.2516	207.83
1.2524	208.08
1.2532	208.29
1.254	208.47
1.2548	208.7
1.2556	208.89
1.2564	209.04
1.2572	209.22
1.258	209.37
1.2588	209.49
1.2596	209.6
1.2604	209.63
1.2612	209.67
1.262	209.75
1.2627	209.87
1.2635	210.03
1.2643	210.16
1.2651	210.24
1.2659	210.31
1.2667	210.37
1.2675	210.47
1.2683	210.52
1.2691	210.65
1.2699	210.77
1.2707	210.94
1.2715	211.09
1.2723	211.23
1.2731	211.36
1.2739	211.48
1.2747	211.61
1.2755	211.76
1.2763	211.86
1.2771	211.94
1.2779	212.07
1.2787	212.21
1.2795	212.31
1.2803	212.44
1.2811	212.6
1.2819	212.8
1.2827	213.02
1.2835	213.16
1.2843	213.28
1.2851	213.42
1.2859	213.51
1.2866	213.58
1.2874	213.65
1.2882	213.73
1.289	213.8
1.2898	213.87
1.2906	213.9
1.2914	213.92
1.2922	213.89
1.293	213.84
1.2938	213.78
1.2946	213.74
1.2954	213.71
1.2962	213.62
1.297	213.51
1.2978	213.42
1.2986	213.37
1.2994	213.35
1.3002	213.32
1.301	213.33
1.3018	213.28
1.3026	213.24
1.3034	213.25
1.3042	213.35
1.305	213.42
1.3058	213.52
1.3066	213.6
1.3074	213.71
1.3082	213.84
1.309	213.93
1.3098	214.01
1.3105	214.08
1.3113	214.07
1.3121	214.08
1.3129	214.03
1.3137	213.95
1.3145	213.84
1.3153	213.71
1.3161	213.62
1.3169	213.6
1.3177	213.61
1.3185	213.49
1.3193	213.34
1.3201	213.24
1.3209	213.06
1.3217	212.9
1.3225	212.7
1.3233	212.51
1.3241	212.34
1.3249	212.13
1.3257	211.92
1.3265	211.71
1.3273	211.54
1.3281	211.38
1.3289	211.2
1.3297	211.05
1.3305	210.89
1.3313	210.74
1.3321	210.6
1.3329	210.43
1.3337	210.27
1.3344	210.11
1.3352	209.96
1.336	209.88
1.3368	209.78
1.3376	209.63
1.3384	209.45
1.3392	209.24
1.34	209.11
1.3408	209
1.3416	208.86
1.3424	208.7
1.3432	208.52
1.344	208.28
1.3448	208.08
1.3456	207.86
1.3464	207.65
1.3472	207.43
1.348	207.22
1.3488	206.98
1.3496	206.77
1.3504	206.59
1.3512	206.34
1.352	206.08
1.3528	205.81
1.3536	205.54
1.3544	205.34
1.3552	205.14
1.356	204.94
1.3568	204.72
1.3576	204.47
1.3583	204.24
1.3591	204
1.3599	203.73
1.3607	203.44
1.3615	203.21
1.3623	202.96
1.3631	202.74
1.3639	202.58
1.3647	202.41
1.3655	202.22
1.3663	202.03
1.3671	201.84
1.3679	201.63
1.3687	201.48
1.3695	201.28
1.3703	201.06
1.3711	200.86
1.3719	200.71
1.3727	200.57
1.3735	200.47
1.3743	200.37
1.3751	200.25
1.3759	200.14
1.3767	200.05
1.3775	199.94
1.3783	199.82
1.3791	199.64
1.3799	199.5
1.3807	199.32
1.3815	199.13
1.3822	198.98
1.383	198.83
1.3838	198.62
1.3846	198.45
1.3854	198.22
1.3862	198
1.387	197.78
1.3878	197.54
1.3886	197.31
1.3894	197.04
1.3902	196.76
1.391	196.52
1.3918	196.32
1.3926	196.2
1.3934	196.08
1.3942	196
1.395	195.98
1.3958	195.85
1.3966	195.7
1.3974	195.57
1.3982	195.5
1.399	195.44
1.3998	195.27
1.4006	195.17
1.4014	195.09
1.4022	195.02
1.403	194.94
1.4038	194.82
1.4046	194.74
1.4054	194.66
1.4062	194.61
1.4069	194.51
1.4077	194.38
1.4085	194.3
1.4093	194.19
1.4101	194.11
1.4109	194.03
1.4117	193.9
1.4125	193.82
1.4133	193.71
1.4141	193.57
1.4149	193.42
1.4157	193.31
1.4165	193.25
1.4173	193.27
1.4181	193.32
1.4189	193.33
1.4197	193.29
1.4205	193.22
1.4213	193.14
1.4221	193.09
1.4229	193.06
1.4237	193.1
1.4245	193.11
1.4253	193.13
1.4261	193.12
1.4269	193.13
1.4277	193.14
1.4285	193.17
1.4293	193.2
1.4301	193.21
1.4308	193.25
1.4316	193.32
1.4324	193.44
1.4332	193.53
1.434	193.57
1.4348	193.63
1.4356	193.71
1.4364	193.77
1.4372	193.87
1.438	193.93
1.4388	194.03
1.4396	194.18
1.4404	194.33
1.4412	194.46
1.442	194.59
1.4428	194.7
1.4436	194.78
1.4444	194.84
1.4452	194.94
1.446	195.02
1.4468	195.08
1.4476	195.11
1.4484	195.12
1.4492	195.14
1.45	195.2
1.4508	195.28
1.4516	195.33
1.4524	195.41
1.4532	195.48
1.454	195.56
1.4547	195.69
1.4555	195.8
1.4563	195.86
1.4571	195.87
1.4579	195.92
1.4587	195.99
1.4595	196.1
1.4603	196.23
1.4611	196.36
1.4619	196.48
1.4627	196.56
1.4635	196.62
1.4643	196.66
1.4651	196.75
1.4659	196.78
1.4667	196.85
1.4675	196.99
1.4683	197.11
1.4691	197.22
1.4699	197.35
1.4707	197.5
1.4715	197.59
1.4723	197.65
1.4731	197.74
1.4739	197.83
1.4747	197.89
1.4755	198
1.4763	198.07
1.4771	198.12
1.4779	198.2
1.4786	198.27
1.4794	198.33
1.4802	198.39
1.481	198.47
1.4818	198.52
1.4826	198.58
1.4834	198.65
1.4842	198.72
1.485	198.8
1.4858	198.87
1.4866	198.97
1.4874	199.1
1.4882	199.21
1.489	199.3
1.4898	199.36
1.4906	199.42
1.4914	199.54
1.4922	199.63
1.493	199.73
1.4938	199.83
1.4946	199.96
1.4954	199.98
1.4962	199.98
1.497	199.93
1.4978	199.82
1.4986	199.76
1.4994	199.77
1.5002	199.8
1.501	199.82
1.5018	199.77
1.5025	199.63
1.5033	199.47
1.5041	199.37
1.5049	199.32
1.5057	199.3
1.5065	199.24
1.5073	199.15
1.5081	199.06
1.5089	198.93
1.5097	198.79
1.5105	198.69
1.5113	198.61
1.5121	198.55
1.5129	198.47
1.5137	198.4
1.5145	198.29
1.5153	198.12
1.5161	197.98
1.5169	197.81
1.5177	197.64
1.5185	197.49
1.5193	197.29
1.5201	197.11
1.5209	196.91
1.5217	196.71
1.5225	196.53
1.5233	196.33
1.5241	196.18
1.5249	195.98
1.5257	195.76
1.5264	195.51
1.5272	195.35
1.528	195.23
1.5288	195.14
1.5296	195.08
1.5304	194.95
1.5312	194.79
1.532	194.63
1.5328	194.52
1.5336	194.44
1.5344	194.33
1.5352	194.16
1.536	194.02
1.5368	193.9
1.5376	193.76
1.5384	193.65
1.5392	193.52
1.54	193.38
1.5408	193.2
1.5416	193.04
1.5424	192.89
1.5432	192.8
1.544	192.73
1.5448	192.65
1.5456	192.71
1.5464	192.66
1.5472	192.57
1.548	192.52
1.5488	192.52
1.5496	192.5
1.5504	192.49
1.5511	192.54
1.5519	192.6
1.5527	192.7
1.5535	192.78
1.5543	192.83
1.5551	192.88
1.5559	192.9
1.5567	192.88
1.5575	192.88
1.5583	192.91
1.5591	193.04
1.5599	193.16
1.5607	193.28
1.5615	193.42
1.5623	193.59
1.5631	193.7
1.5639	193.78
1.5647	193.9
1.5655	194.01
1.5663	194.07
1.5671	194.16
1.5679	194.28
1.5687	194.4
1.5695	194.53
1.5703	194.6
1.5711	194.64
1.5719	194.75
1.5727	194.89
1.5735	195
1.5743	195.04
1.575	195.09
1.5758	195.14
1.5766	195.23
1.5774	195.39
1.5782	195.54
1.579	195.66
1.5798	195.79
1.5806	195.97
1.5814	196.18
1.5822	196.46
1.583	196.64
1.5838	196.81
1.5846	196.95
1.5854	197.11
1.5862	197.28
1.587	197.44
1.5878	197.66
1.5886	197.87
1.5894	198.05
1.5902	198.23
1.591	198.37
[truncated: 12,381 more rows]

## Sheet: 2E
Note: Hairs were scanned from root (0 cm) to tip, but are graphed from tip (as 0 cm) to root. Therefore, all hairs are reversed when graphed.
Distance (cm)	Intensity (A.U.)
0	17.46
0.0008	17.54
0.0016	17.61
0.0024	17.67
0.0032	17.73
0.004	17.79
0.0048	17.85
0.0056	17.91
0.0064	17.97
0.0072	18.03
0.008	18.08
0.0088	18.14
0.0096	18.2
0.0104	18.25
0.0112	18.3
0.012	18.35
0.0127	18.4
0.0135	18.45
0.0143	18.51
0.0151	18.57
0.0159	18.63
0.0167	18.69
0.0175	18.75
0.0183	18.8
0.0191	18.85
0.0199	18.91
0.0207	18.97
0.0215	19.03
0.0223	19.08
0.0231	19.13
0.0239	19.18
0.0247	19.25
0.0255	19.31
0.0263	19.37
0.0271	19.42
0.0279	19.46
0.0287	19.5
0.0295	19.55
0.0303	19.6
0.0311	19.66
0.0319	19.72
0.0327	19.77
0.0335	19.81
0.0343	19.84
0.0351	19.85
0.0359	19.86
0.0366	19.87
0.0374	19.88
0.0382	19.89
0.039	19.9
0.0398	19.91
0.0406	19.93
0.0414	19.95
0.0422	19.98
0.043	20
0.0438	20.01
0.0446	20.02
0.0454	20.02
0.0462	20.02
0.047	20.02
0.0478	20.02
0.0486	20.02
0.0494	20.02
0.0502	20.02
0.051	20.02
0.0518	20.02
0.0526	20.03
0.0534	20.03
0.0542	20.02
0.055	20.02
0.0558	20.02
0.0566	20.02
0.0574	20.01
0.0582	20
0.059	19.98
0.0598	19.96
0.0605	19.95
0.0613	19.95
0.0621	19.97
0.0629	19.99
0.0637	20
0.0645	20.03
0.0653	20.07
0.0661	20.11
0.0669	20.14
0.0677	20.17
0.0685	20.2
0.0693	20.24
0.0701	20.29
0.0709	20.36
0.0717	20.43
0.0725	20.52
0.0733	20.61
0.0741	20.7
0.0749	20.79
0.0757	20.86
0.0765	20.91
0.0773	20.95
0.0781	20.99
0.0789	21.05
0.0797	21.11
0.0805	21.18
0.0813	21.26
0.0821	21.36
0.0829	21.46
0.0837	21.57
0.0844	21.69
0.0852	21.82
0.086	21.95
0.0868	22.09
0.0876	22.24
0.0884	22.39
0.0892	22.54
0.09	22.69
0.0908	22.84
0.0916	23
0.0924	23.16
0.0932	23.32
0.094	23.47
0.0948	23.63
0.0956	23.78
0.0964	23.93
0.0972	24.08
0.098	24.24
0.0988	24.41
0.0996	24.58
0.1004	24.74
0.1012	24.89
0.102	25.02
0.1028	25.14
0.1036	25.26
0.1044	25.37
0.1052	25.47
0.106	25.56
0.1068	25.65
0.1076	25.75
0.1083	25.87
0.1091	26
0.1099	26.14
0.1107	26.27
0.1115	26.39
0.1123	26.51
0.1131	26.62
0.1139	26.72
0.1147	26.8
0.1155	26.87
0.1163	26.94
0.1171	27.02
0.1179	27.1
0.1187	27.19
0.1195	27.3
0.1203	27.42
0.1211	27.55
0.1219	27.67
0.1227	27.78
0.1235	27.89
0.1243	27.99
0.1251	28.09
0.1259	28.18
0.1267	28.26
0.1275	28.33
0.1283	28.4
0.1291	28.48
0.1299	28.57
0.1307	28.67
0.1315	28.78
0.1322	28.89
0.133	29
0.1338	29.11
0.1346	29.22
0.1354	29.33
0.1362	29.44
0.137	29.56
0.1378	29.67
0.1386	29.77
0.1394	29.86
0.1402	29.94
0.141	30.02
0.1418	30.08
0.1426	30.14
0.1434	30.2
0.1442	30.24
0.145	30.25
0.1458	30.25
0.1466	30.25
0.1474	30.24
0.1482	30.23
0.149	30.21
0.1498	30.18
0.1506	30.12
0.1514	30.06
0.1522	29.98
0.153	29.89
0.1538	29.79
0.1546	29.68
0.1554	29.58
0.1562	29.48
0.1569	29.39
0.1577	29.3
0.1585	29.19
0.1593	29.06
0.1601	28.92
0.1609	28.77
0.1617	28.61
0.1625	28.45
0.1633	28.28
0.1641	28.1
0.1649	27.91
0.1657	27.72
0.1665	27.51
0.1673	27.3
0.1681	27.08
0.1689	26.86
0.1697	26.65
0.1705	26.45
0.1713	26.23
0.1721	26.01
0.1729	25.79
0.1737	25.57
0.1745	25.34
0.1753	25.12
0.1761	24.9
0.1769	24.69
0.1777	24.48
0.1785	24.25
0.1793	24.02
0.1801	23.8
0.1808	23.58
0.1816	23.38
0.1824	23.19
0.1832	23
0.184	22.81
0.1848	22.64
0.1856	22.48
0.1864	22.32
0.1872	22.16
0.188	21.98
0.1888	21.79
0.1896	21.58
0.1904	21.37
0.1912	21.17
0.192	20.97
0.1928	20.79
0.1936	20.63
0.1944	20.5
0.1952	20.38
0.196	20.26
0.1968	20.13
0.1976	20
0.1984	19.86
0.1992	19.7
0.2	19.52
0.2008	19.33
0.2016	19.15
0.2024	18.99
0.2032	18.82
0.204	18.66
0.2047	18.52
0.2055	18.38
0.2063	18.25
0.2071	18.13
0.2079	18.01
0.2087	17.88
0.2095	17.74
0.2103	17.6
0.2111	17.45
0.2119	17.29
0.2127	17.13
0.2135	16.98
0.2143	16.83
0.2151	16.69
0.2159	16.56
0.2167	16.43
0.2175	16.32
0.2183	16.23
0.2191	16.17
0.2199	16.13
0.2207	16.13
0.2215	16.17
0.2223	16.21
0.2231	16.24
0.2239	16.25
0.2247	16.26
0.2255	16.27
0.2263	16.29
0.2271	16.35
0.2279	16.48
0.2286	16.67
0.2294	16.88
0.2302	17.05
0.231	17.13
0.2318	17.13
0.2326	17.09
0.2334	17.03
0.2342	16.97
0.235	16.91
0.2358	16.85
0.2366	16.79
0.2374	16.73
0.2382	16.67
0.239	16.62
0.2398	16.57
0.2406	16.53
0.2414	16.49
0.2422	16.45
0.243	16.41
0.2438	16.37
0.2446	16.33
0.2454	16.29
0.2462	16.26
0.247	16.23
0.2478	16.2
0.2486	16.17
0.2494	16.14
0.2502	16.1
0.251	16.07
0.2518	16.04
0.2525	16.01
0.2533	15.98
0.2541	15.95
0.2549	15.92
0.2557	15.89
0.2565	15.85
0.2573	15.81
0.2581	15.78
0.2589	15.75
0.2597	15.72
0.2605	15.7
0.2613	15.69
0.2621	15.68
0.2629	15.67
0.2637	15.66
0.2645	15.65
0.2653	15.64
0.2661	15.63
0.2669	15.62
0.2677	15.61
0.2685	15.6
0.2693	15.6
0.2701	15.6
0.2709	15.6
0.2717	15.6
0.2725	15.6
0.2733	15.6
0.2741	15.6
0.2749	15.6
0.2757	15.6
0.2764	15.6
0.2772	15.6
0.278	15.6
0.2788	15.6
0.2796	15.6
0.2804	15.6
0.2812	15.59
0.282	15.58
0.2828	15.58
0.2836	15.58
0.2844	15.57
0.2852	15.57
0.286	15.57
0.2868	15.57
0.2876	15.57
0.2884	15.57
0.2892	15.57
0.29	15.56
0.2908	15.54
0.2916	15.53
0.2924	15.52
0.2932	15.51
0.294	15.5
0.2948	15.48
0.2956	15.45
0.2964	15.41
0.2972	15.36
0.298	15.3
0.2988	15.22
0.2996	15.12
0.3004	14.98
0.3011	14.8
0.3019	14.63
0.3027	14.48
0.3035	14.35
0.3043	14.24
0.3051	14.14
0.3059	14.03
0.3067	13.89
0.3075	13.68
0.3083	13.4
0.3091	13.1
0.3099	12.85
0.3107	12.68
0.3115	12.6
0.3123	12.56
0.3131	12.54
0.3139	12.52
0.3147	12.5
0.3155	12.49
0.3163	12.48
0.3171	12.47
0.3179	12.47
0.3187	12.47
0.3195	12.47
0.3203	12.47
0.3211	12.47
0.3219	12.47
0.3227	12.47
0.3235	12.47
0.3243	12.47
0.325	12.47
0.3258	12.47
0.3266	12.47
0.3274	12.47
0.3282	12.47
0.329	12.47
0.3298	12.47
0.3306	12.47
0.3314	12.47
0.3322	12.48
0.333	12.48
0.3338	12.48
0.3346	12.49
0.3354	12.49
0.3362	12.49
0.337	12.49
0.3378	12.49
0.3386	12.48
0.3394	12.47
0.3402	12.47
0.341	12.46
0.3418	12.45
0.3426	12.44
0.3434	12.42
0.3442	12.4
0.345	12.38
0.3458	12.36
0.3466	12.34
0.3474	12.32
0.3482	12.3
0.3489	12.27
0.3497	12.25
0.3505	12.23
0.3513	12.22
0.3521	12.21
0.3529	12.2
0.3537	12.19
0.3545	12.18
0.3553	12.17
0.3561	12.16
0.3569	12.15
0.3577	12.14
0.3585	12.13
0.3593	12.12
0.3601	12.12
0.3609	12.12
0.3617	12.12
0.3625	12.12
0.3633	12.12
0.3641	12.11
0.3649	12.1
0.3657	12.09
0.3665	12.08
0.3673	12.07
0.3681	12.06
0.3689	12.06
0.3697	12.06
0.3705	12.07
0.3713	12.06
0.3721	12.05
0.3728	12.04
0.3736	12.03
0.3744	12.01
0.3752	11.99
0.376	11.97
0.3768	11.95
0.3776	11.93
0.3784	11.91
0.3792	11.89
0.38	11.88
0.3808	11.88
0.3816	11.87
0.3824	11.87
0.3832	11.88
0.384	11.88
0.3848	11.88
0.3856	11.88
0.3864	11.87
0.3872	11.86
0.388	11.86
0.3888	11.86
0.3896	11.86
0.3904	11.86
0.3912	11.85
0.392	11.84
0.3928	11.83
0.3936	11.82
0.3944	11.82
0.3952	11.81
0.396	11.8
0.3967	11.8
0.3975	11.8
0.3983	11.8
0.3991	11.8
0.3999	11.8
0.4007	11.8
0.4015	11.8
0.4023	11.8
0.4031	11.8
0.4039	11.8
0.4047	11.8
0.4055	11.8
0.4063	11.81
0.4071	11.82
0.4079	11.83
0.4087	11.84
0.4095	11.85
0.4103	11.86
0.4111	11.87
0.4119	11.87
0.4127	11.88
0.4135	11.89
0.4143	11.88
0.4151	11.88
0.4159	11.88
0.4167	11.88
0.4175	11.88
0.4183	11.89
0.4191	11.91
0.4199	11.92
0.4207	11.93
0.4214	11.95
0.4222	11.99
0.423	12.06
0.4238	12.14
0.4246	12.22
0.4254	12.3
0.4262	12.37
0.427	12.43
0.4278	12.49
0.4286	12.56
0.4294	12.62
0.4302	12.68
0.431	12.73
0.4318	12.79
0.4326	12.85
0.4334	12.91
0.4342	12.96
0.435	13
0.4358	13.04
0.4366	13.08
0.4374	13.13
0.4382	13.18
0.439	13.23
0.4398	13.26
0.4406	13.3
0.4414	13.34
0.4422	13.39
0.443	13.43
0.4438	13.48
0.4446	13.53
0.4453	13.59
0.4461	13.65
0.4469	13.71
0.4477	13.77
0.4485	13.81
0.4493	13.85
0.4501	13.9
0.4509	13.96
0.4517	14.02
0.4525	14.07
0.4533	14.12
0.4541	14.17
0.4549	14.22
0.4557	14.26
0.4565	14.29
0.4573	14.32
0.4581	14.35
0.4589	14.37
0.4597	14.38
0.4605	14.39
0.4613	14.4
0.4621	14.41
0.4629	14.42
0.4637	14.44
0.4645	14.47
0.4653	14.5
0.4661	14.53
0.4669	14.56
0.4677	14.59
0.4685	14.62
0.4692	14.64
0.47	14.66
0.4708	14.68
0.4716	14.71
0.4724	14.74
0.4732	14.77
0.474	14.8
0.4748	14.84
0.4756	14.87
0.4764	14.89
0.4772	14.91
0.478	14.93
0.4788	14.95
0.4796	14.96
0.4804	14.97
0.4812	14.98
0.482	14.99
0.4828	15
0.4836	15.01
0.4844	15.02
0.4852	15.03
0.486	15.04
0.4868	15.05
0.4876	15.06
0.4884	15.07
0.4892	15.08
0.49	15.09
0.4908	15.1
0.4916	15.1
0.4924	15.1
0.4931	15.11
0.4939	15.13
0.4947	15.15
0.4955	15.17
0.4963	15.19
0.4971	15.21
0.4979	15.24
0.4987	15.26
0.4995	15.28
0.5003	15.3
0.5011	15.31
0.5019	15.3
0.5027	15.27
0.5035	15.23
0.5043	15.19
0.5051	15.15
0.5059	15.12
0.5067	15.1
0.5075	15.09
0.5083	15.08
0.5091	15.07
0.5099	15.06
0.5107	15.05
0.5115	15.03
0.5123	15.01
0.5131	14.98
0.5139	14.96
0.5147	14.95
0.5155	14.94
0.5163	14.93
0.517	14.92
0.5178	14.91
0.5186	14.9
0.5194	14.9
0.5202	14.89
0.521	14.88
0.5218	14.86
0.5226	14.86
0.5234	14.86
0.5242	14.86
0.525	14.85
0.5258	14.84
0.5266	14.83
0.5274	14.82
0.5282	14.83
0.529	14.84
0.5298	14.84
0.5306	14.84
0.5314	14.84
0.5322	14.85
0.533	14.86
0.5338	14.87
0.5346	14.88
0.5354	14.9
0.5362	14.92
0.537	14.94
0.5378	14.96
0.5386	14.99
0.5394	15.02
0.5402	15.05
0.5409	15.08
0.5417	15.1
0.5425	15.12
0.5433	15.14
0.5441	15.16
0.5449	15.18
0.5457	15.22
0.5465	15.26
0.5473	15.3
0.5481	15.33
0.5489	15.37
0.5497	15.41
0.5505	15.45
0.5513	15.47
0.5521	15.49
0.5529	15.51
0.5537	15.52
0.5545	15.53
0.5553	15.55
0.5561	15.57
0.5569	15.59
0.5577	15.61
0.5585	15.63
0.5593	15.66
0.5601	15.69
0.5609	15.71
0.5617	15.74
0.5625	15.77
0.5633	15.8
0.5641	15.83
0.5649	15.87
0.5656	15.91
0.5664	15.95
0.5672	15.99
0.568	16.03
0.5688	16.08
0.5696	16.13
0.5704	16.18
0.5712	16.23
0.572	16.28
0.5728	16.32
0.5736	16.36
0.5744	16.39
0.5752	16.42
0.576	16.45
0.5768	16.48
0.5776	16.5
0.5784	16.53
0.5792	16.57
0.58	16.61
0.5808	16.65
0.5816	16.69
0.5824	16.72
0.5832	16.75
0.584	16.78
0.5848	16.8
0.5856	16.82
0.5864	16.85
0.5872	16.87
0.588	16.89
0.5888	16.91
0.5895	16.93
0.5903	16.96
0.5911	16.99
0.5919	17.02
0.5927	17.06
0.5935	17.11
0.5943	17.16
0.5951	17.2
0.5959	17.24
0.5967	17.27
0.5975	17.3
0.5983	17.33
0.5991	17.36
0.5999	17.39
0.6007	17.42
0.6015	17.45
0.6023	17.47
0.6031	17.49
0.6039	17.5
0.6047	17.51
0.6055	17.52
0.6063	17.54
0.6071	17.55
0.6079	17.55
0.6087	17.55
0.6095	17.55
0.6103	17.55
0.6111	17.54
0.6119	17.53
0.6127	17.52
0.6134	17.52
0.6142	17.53
0.615	17.55
0.6158	17.59
0.6166	17.63
0.6174	17.67
0.6182	17.7
0.619	17.73
0.6198	17.76
0.6206	17.79
0.6214	17.82
0.6222	17.85
0.623	17.88
0.6238	17.9
0.6246	17.92
0.6254	17.93
0.6262	17.95
0.627	17.97
0.6278	18
0.6286	18.04
0.6294	18.08
0.6302	18.12
0.631	18.18
0.6318	18.23
0.6326	18.28
0.6334	18.34
0.6342	18.4
0.635	18.46
0.6358	18.52
0.6366	18.58
0.6373	18.65
0.6381	18.72
0.6389	18.79
0.6397	18.86
0.6405	18.95
0.6413	19.04
0.6421	19.13
0.6429	19.21
0.6437	19.28
0.6445	19.33
0.6453	19.37
0.6461	19.42
0.6469	19.47
0.6477	19.53
0.6485	19.6
0.6493	19.68
0.6501	19.77
0.6509	19.88
0.6517	20
0.6525	20.11
0.6533	20.21
0.6541	20.3
0.6549	20.38
0.6557	20.44
0.6565	20.5
0.6573	20.56
0.6581	20.62
0.6589	20.67
0.6597	20.73
0.6605	20.8
0.6612	20.88
0.662	20.97
0.6628	21.07
0.6636	21.17
0.6644	21.29
0.6652	21.42
0.666	21.54
0.6668	21.66
0.6676	21.78
0.6684	21.9
0.6692	22.02
0.67	22.14
0.6708	22.27
0.6716	22.4
0.6724	22.52
0.6732	22.62
0.674	22.72
0.6748	22.83
0.6756	22.93
0.6764	23.04
0.6772	23.15
0.678	23.26
0.6788	23.38
0.6796	23.5
0.6804	23.62
0.6812	23.74
0.682	23.86
0.6828	23.97
0.6836	24.09
0.6844	24.21
0.6851	24.33
0.6859	24.45
0.6867	24.58
0.6875	24.72
0.6883	24.87
0.6891	25.02
0.6899	25.18
0.6907	25.35
0.6915	25.52
0.6923	25.69
0.6931	25.86
0.6939	26.01
0.6947	26.16
0.6955	26.3
0.6963	26.43
0.6971	26.55
0.6979	26.67
0.6987	26.79
0.6995	26.9
0.7003	27.01
0.7011	27.12
0.7019	27.24
0.7027	27.36
0.7035	27.48
0.7043	27.59
0.7051	27.7
0.7059	27.81
0.7067	27.92
0.7075	28.05
0.7083	28.16
0.7091	28.27
0.7098	28.39
0.7106	28.52
0.7114	28.67
0.7122	28.83
0.713	28.98
0.7138	29.12
0.7146	29.27
0.7154	29.41
0.7162	29.54
0.717	29.66
0.7178	29.78
0.7186	29.88
0.7194	29.98
0.7202	30.06
0.721	30.12
0.7218	30.19
0.7226	30.27
0.7234	30.37
0.7242	30.49
0.725	30.61
0.7258	30.73
0.7266	30.85
0.7274	30.96
0.7282	31.04
0.729	31.09
0.7298	31.13
0.7306	31.16
0.7314	31.17
0.7322	31.2
0.733	31.23
0.7337	31.28
0.7345	31.33
0.7353	31.4
0.7361	31.46
0.7369	31.51
0.7377	31.55
0.7385	31.59
0.7393	31.62
0.7401	31.65
0.7409	31.67
0.7417	31.7
0.7425	31.72
0.7433	31.74
0.7441	31.75
0.7449	31.75
0.7457	31.75
0.7465	31.75
0.7473	31.75
0.7481	31.76
0.7489	31.77
0.7497	31.76
0.7505	31.74
0.7513	31.72
0.7521	31.72
0.7529	31.73
0.7537	31.74
0.7545	31.75
0.7553	31.77
0.7561	31.77
0.7569	31.77
0.7576	31.78
0.7584	31.78
0.7592	31.78
0.76	31.79
0.7608	31.79
0.7616	31.79
0.7624	31.81
0.7632	31.83
0.764	31.85
0.7648	31.87
0.7656	31.88
0.7664	31.88
0.7672	31.86
0.768	31.83
0.7688	31.8
0.7696	31.76
0.7704	31.71
0.7712	31.66
0.772	31.6
0.7728	31.54
0.7736	31.49
0.7744	31.44
0.7752	31.39
0.776	31.36
0.7768	31.34
0.7776	31.34
0.7784	31.33
0.7792	31.32
0.78	31.31
0.7808	31.3
0.7815	31.28
0.7823	31.26
0.7831	31.24
0.7839	31.23
0.7847	31.22
0.7855	31.2
0.7863	31.17
0.7871	31.11
0.7879	31.05
0.7887	30.99
0.7895	30.93
0.7903	30.85
0.7911	30.76
0.7919	30.66
0.7927	30.56
0.7935	30.47
0.7943	30.37
0.7951	30.28
0.7959	30.21
0.7967	30.14
0.7975	30.07
0.7983	30.02
0.7991	29.96
0.7999	29.92
0.8007	29.89
0.8015	29.84
0.8023	29.79
0.8031	29.74
0.8039	29.68
0.8047	29.63
0.8054	29.58
0.8062	29.54
0.807	29.51
0.8078	29.49
0.8086	29.49
0.8094	29.48
0.8102	29.46
0.811	29.46
0.8118	29.45
0.8126	29.46
0.8134	29.48
0.8142	29.51
0.815	29.54
0.8158	29.57
0.8166	29.62
0.8174	29.67
0.8182	29.72
0.819	29.78
0.8198	29.84
0.8206	29.91
0.8214	29.97
0.8222	30.03
0.823	30.09
0.8238	30.14
0.8246	30.19
0.8254	30.24
0.8262	30.29
0.827	30.35
0.8278	30.4
0.8286	30.44
0.8293	30.49
0.8301	30.53
0.8309	30.57
0.8317	30.59
0.8325	30.61
0.8333	30.63
0.8341	30.65
0.8349	30.66
0.8357	30.68
0.8365	30.71
0.8373	30.74
0.8381	30.77
0.8389	30.8
0.8397	30.81
0.8405	30.82
0.8413	30.83
0.8421	30.82
0.8429	30.81
0.8437	30.81
0.8445	30.82
0.8453	30.84
0.8461	30.88
0.8469	30.93
0.8477	30.99
0.8485	31.05
0.8493	31.11
0.8501	31.18
0.8509	31.25
0.8517	31.32
0.8525	31.39
0.8533	31.46
0.854	31.52
0.8548	31.58
0.8556	31.63
0.8564	31.68
0.8572	31.73
0.858	31.79
0.8588	31.87
0.8596	31.95
0.8604	32.04
0.8612	32.13
0.862	32.21
0.8628	32.29
0.8636	32.36
0.8644	32.42
0.8652	32.48
0.866	32.55
0.8668	32.64
0.8676	32.75
0.8684	32.86
0.8692	32.95
0.87	33.03
0.8708	33.1
0.8716	33.15
0.8724	33.2
0.8732	33.23
0.874	33.26
0.8748	33.29
0.8756	33.31
0.8764	33.33
0.8772	33.36
0.8779	33.4
0.8787	33.46
0.8795	33.51
0.8803	33.56
0.8811	33.62
0.8819	33.68
0.8827	33.73
0.8835	33.78
0.8843	33.82
0.8851	33.85
0.8859	33.87
0.8867	33.87
0.8875	33.88
0.8883	33.9
0.8891	33.93
0.8899	33.97
0.8907	34
0.8915	34.02
0.8923	34.04
0.8931	34.05
0.8939	34.06
0.8947	34.07
0.8955	34.09
0.8963	34.09
0.8971	34.08
0.8979	34.07
0.8987	34.05
0.8995	34.03
0.9003	34.01
0.9011	33.99
0.9018	33.97
0.9026	33.96
0.9034	33.97
0.9042	33.98
0.905	33.98
0.9058	33.97
0.9066	33.94
0.9074	33.9
0.9082	33.86
0.909	33.83
0.9098	33.81
0.9106	33.79
0.9114	33.79
0.9122	33.8
0.913	33.81
0.9138	33.81
0.9146	33.82
0.9154	33.82
0.9162	33.8
0.917	33.77
0.9178	33.73
0.9186	33.69
0.9194	33.66
0.9202	33.65
0.921	33.64
0.9218	33.65
0.9226	33.67
0.9234	33.68
0.9242	33.69
0.925	33.69
0.9257	33.68
0.9265	33.66
0.9273	33.62
0.9281	33.57
0.9289	33.51
0.9297	33.45
0.9305	33.39
0.9313	33.34
0.9321	33.3
0.9329	33.26
0.9337	33.21
0.9345	33.16
0.9353	33.11
0.9361	33.05
0.9369	32.98
0.9377	32.91
0.9385	32.83
0.9393	32.75
0.9401	32.66
0.9409	32.57
0.9417	32.49
0.9425	32.4
0.9433	32.33
0.9441	32.27
0.9449	32.21
0.9457	32.15
0.9465	32.08
0.9473	32
0.9481	31.92
0.9489	31.85
0.9496	31.79
0.9504	31.75
0.9512	31.73
0.952	31.72
0.9528	31.73
0.9536	31.75
0.9544	31.76
0.9552	31.76
0.956	31.76
0.9568	31.75
0.9576	31.73
0.9584	31.69
0.9592	31.64
0.96	31.58
0.9608	31.51
0.9616	31.43
0.9624	31.35
0.9632	31.27
0.964	31.19
0.9648	31.11
0.9656	31.04
0.9664	30.98
0.9672	30.91
0.968	30.83
0.9688	30.76
0.9696	30.69
0.9704	30.61
0.9712	30.55
0.972	30.47
0.9728	30.39
0.9736	30.3
0.9743	30.21
0.9751	30.12
0.9759	30.04
0.9767	29.97
0.9775	29.89
0.9783	29.81
0.9791	29.72
0.9799	29.63
0.9807	29.53
0.9815	29.43
0.9823	29.32
0.9831	29.19
0.9839	29.06
0.9847	28.94
0.9855	28.84
0.9863	28.75
0.9871	28.68
0.9879	28.63
0.9887	28.57
0.9895	28.51
0.9903	28.45
0.9911	28.37
0.9919	28.27
0.9927	28.17
0.9935	28.08
0.9943	27.99
0.9951	27.92
0.9959	27.87
0.9967	27.83
0.9975	27.79
0.9982	27.74
0.999	27.68
0.9998	27.61
1.0006	27.54
1.0014	27.47
1.0022	27.39
1.003	27.31
1.0038	27.21
1.0046	27.11
1.0054	27
1.0062	26.9
1.007	26.81
1.0078	26.73
1.0086	26.66
1.0094	26.58
1.0102	26.51
1.011	26.43
1.0118	26.34
1.0126	26.25
1.0134	26.17
1.0142	26.09
1.015	26.01
1.0158	25.94
1.0166	25.87
1.0174	25.8
1.0182	25.73
1.019	25.67
1.0198	25.61
1.0206	25.54
1.0214	25.48
1.0221	25.43
1.0229	25.38
1.0237	25.33
1.0245	25.28
1.0253	25.24
1.0261	25.2
1.0269	25.16
1.0277	25.13
1.0285	25.1
1.0293	25.07
1.0301	25.03
1.0309	25
1.0317	24.96
1.0325	24.92
1.0333	24.87
1.0341	24.83
1.0349	24.8
1.0357	24.77
1.0365	24.74
1.0373	24.71
1.0381	24.69
1.0389	24.69
1.0397	24.7
1.0405	24.72
1.0413	24.76
1.0421	24.8
1.0429	24.83
1.0437	24.85
1.0445	24.87
1.0453	24.88
1.046	24.89
1.0468	24.9
1.0476	24.91
1.0484	24.91
1.0492	24.9
1.05	24.9
1.0508	24.89
1.0516	24.88
1.0524	24.87
1.0532	24.87
1.054	24.87
1.0548	24.87
1.0556	24.87
1.0564	24.87
1.0572	24.88
1.058	24.89
1.0588	24.89
1.0596	24.88
1.0604	24.87
1.0612	24.86
1.062	24.84
1.0628	24.83
1.0636	24.81
1.0644	24.79
1.0652	24.77
1.066	24.75
1.0668	24.72
1.0676	24.69
1.0684	24.66
1.0692	24.64
1.0699	24.62
1.0707	24.6
1.0715	24.59
1.0723	24.57
1.0731	24.55
1.0739	24.53
1.0747	24.49
1.0755	24.44
1.0763	24.38
1.0771	24.34
1.0779	24.32
1.0787	24.32
1.0795	24.33
1.0803	24.35
1.0811	24.36
1.0819	24.37
1.0827	24.38
1.0835	24.4
1.0843	24.42
1.0851	24.45
1.0859	24.48
1.0867	24.5
1.0875	24.51
1.0883	24.51
1.0891	24.51
1.0899	24.5
1.0907	24.5
1.0915	24.5
1.0923	24.51
1.0931	24.52
1.0938	24.54
1.0946	24.56
1.0954	24.57
1.0962	24.57
1.097	24.56
1.0978	24.55
1.0986	24.52
1.0994	24.49
1.1002	24.47
1.101	24.44
1.1018	24.41
1.1026	24.37
1.1034	24.34
1.1042	24.31
1.105	24.27
1.1058	24.22
1.1066	24.17
1.1074	24.11
1.1082	24.05
1.109	23.99
1.1098	23.93
1.1106	23.86
1.1114	23.79
1.1122	23.72
1.113	23.65
1.1138	23.58
1.1146	23.5
1.1154	23.42
1.1162	23.34
1.117	23.25
1.1178	23.16
1.1185	23.06
1.1193	22.96
1.1201	22.86
1.1209	22.75
1.1217	22.64
1.1225	22.54
1.1233	22.45
1.1241	22.36
1.1249	22.27
1.1257	22.18
1.1265	22.08
1.1273	21.98
1.1281	21.88
1.1289	21.79
1.1297	21.7
1.1305	21.61
1.1313	21.53
1.1321	21.45
1.1329	21.37
1.1337	21.29
1.1345	21.22
1.1353	21.15
1.1361	21.07
1.1369	20.99
1.1377	20.9
1.1385	20.82
1.1393	20.74
1.1401	20.67
1.1409	20.6
1.1417	20.54
1.1424	20.49
1.1432	20.45
1.144	20.41
1.1448	20.36
1.1456	20.3
1.1464	20.24
1.1472	20.17
1.148	20.09
1.1488	20
1.1496	19.91
1.1504	19.84
1.1512	19.77
1.152	19.71
1.1528	19.65
1.1536	19.59
1.1544	19.55
1.1552	19.51
1.156	19.47
1.1568	19.41
1.1576	19.34
1.1584	19.26
1.1592	19.17
1.16	19.07
1.1608	18.97
1.1616	18.87
1.1624	18.77
1.1632	18.67
1.164	18.57
1.1648	18.48
1.1656	18.39
1.1663	18.31
1.1671	18.24
1.1679	18.18
1.1687	18.13
1.1695	18.08
1.1703	18.02
1.1711	17.96
1.1719	17.89
1.1727	17.82
1.1735	17.74
1.1743	17.66
1.1751	17.59
1.1759	17.53
1.1767	17.48
1.1775	17.43
1.1783	17.38
1.1791	17.33
1.1799	17.28
1.1807	17.24
1.1815	17.2
1.1823	17.16
1.1831	17.11
1.1839	17.06
1.1847	17.01
1.1855	16.97
1.1863	16.93
1.1871	16.88
1.1879	16.83
1.1887	16.79
1.1895	16.75
1.1902	16.71
1.191	16.68
1.1918	16.65
1.1926	16.62
1.1934	16.59
1.1942	16.58
1.195	16.57
1.1958	16.56
1.1966	16.56
1.1974	16.56
1.1982	16.56
1.199	16.56
1.1998	16.56
1.2006	16.56
1.2014	16.56
1.2022	16.56
1.203	16.56
1.2038	16.56
1.2046	16.56
1.2054	16.56
1.2062	16.57
1.207	16.58
1.2078	16.59
1.2086	16.6
1.2094	16.61
1.2102	16.61
1.211	16.61
1.2118	16.61
1.2126	16.61
1.2134	16.61
1.2141	16.6
1.2149	16.59
1.2157	16.59
1.2165	16.59
1.2173	16.6
1.2181	16.6
1.2189	16.6
1.2197	16.6
1.2205	16.59
1.2213	16.58
1.2221	16.56
1.2229	16.54
1.2237	16.52
1.2245	16.5
1.2253	16.49
1.2261	16.48
1.2269	16.46
1.2277	16.45
1.2285	16.44
1.2293	16.43
1.2301	16.41
1.2309	16.39
1.2317	16.37
1.2325	16.35
1.2333	16.34
1.2341	16.33
1.2349	16.32
1.2357	16.32
1.2365	16.33
1.2373	16.33
1.238	16.33
1.2388	16.32
1.2396	16.31
1.2404	16.3
1.2412	16.29
1.242	16.28
1.2428	16.27
1.2436	16.26
1.2444	16.24
1.2452	16.22
1.246	16.2
1.2468	16.19
1.2476	16.18
1.2484	16.17
1.2492	16.16
1.25	16.17
1.2508	16.19
1.2516	16.21
1.2524	16.23
1.2532	16.26
1.254	16.29
1.2548	16.31
1.2556	16.33
1.2564	16.34
1.2572	16.35
1.258	16.37
1.2588	16.39
1.2596	16.4
1.2604	16.4
1.2612	16.4
1.262	16.4
1.2627	16.4
1.2635	16.4
1.2643	16.4
1.2651	16.4
1.2659	16.4
1.2667	16.41
1.2675	16.42
1.2683	16.42
1.2691	16.42
1.2699	16.42
1.2707	16.41
1.2715	16.4
1.2723	16.39
1.2731	16.38
1.2739	16.37
1.2747	16.36
1.2755	16.34
1.2763	16.32
1.2771	16.3
1.2779	16.28
1.2787	16.26
1.2795	16.24
1.2803	16.22
1.2811	16.21
1.2819	16.2
1.2827	16.19
1.2835	16.18
1.2843	16.18
1.2851	16.18
1.2859	16.18
1.2866	16.17
1.2874	16.16
1.2882	16.15
1.289	16.13
1.2898	16.12
1.2906	16.1
1.2914	16.08
1.2922	16.06
1.293	16.04
1.2938	16.02
1.2946	15.99
1.2954	15.96
1.2962	15.93
1.297	15.9
1.2978	15.88
1.2986	15.86
1.2994	15.84
1.3002	15.84
1.301	15.83
1.3018	15.82
1.3026	15.81
1.3034	15.8
1.3042	15.79
1.305	15.78
1.3058	15.78
1.3066	15.79
1.3074	15.8
1.3082	15.81
1.309	15.82
1.3098	15.83
1.3105	15.85
1.3113	15.87
1.3121	15.89
1.3129	15.91
1.3137	15.92
1.3145	15.93
1.3153	15.92
1.3161	15.91
1.3169	15.91
1.3177	15.91
1.3185	15.92
1.3193	15.92
1.3201	15.92
1.3209	15.92
1.3217	15.91
1.3225	15.9
1.3233	15.89
1.3241	15.88
1.3249	15.86
1.3257	15.84
1.3265	15.81
1.3273	15.78
1.3281	15.75
1.3289	15.73
1.3297	15.7
1.3305	15.67
1.3313	15.64
1.3321	15.62
1.3329	15.59
1.3337	15.56
1.3344	15.54
1.3352	15.52
1.336	15.51
1.3368	15.5
1.3376	15.49
1.3384	15.48
1.3392	15.48
1.34	15.48
1.3408	15.48
1.3416	15.48
1.3424	15.48
1.3432	15.48
1.344	15.48
1.3448	15.48
1.3456	15.49
1.3464	15.5
1.3472	15.51
1.348	15.53
1.3488	15.55
1.3496	15.56
1.3504	15.56
1.3512	15.56
1.352	15.56
1.3528	15.57
1.3536	15.57
1.3544	15.57
1.3552	15.58
1.356	15.59
1.3568	15.6
1.3576	15.62
1.3583	15.64
1.3591	15.67
1.3599	15.7
1.3607	15.72
1.3615	15.73
1.3623	15.73
1.3631	15.73
1.3639	15.72
1.3647	15.71
1.3655	15.71
1.3663	15.71
1.3671	15.71
1.3679	15.7
1.3687	15.7
1.3695	15.7
1.3703	15.7
1.3711	15.7
1.3719	15.7
1.3727	15.7
1.3735	15.7
1.3743	15.71
1.3751	15.72
1.3759	15.73
1.3767	15.73
1.3775	15.73
1.3783	15.73
1.3791	15.73
1.3799	15.72
1.3807	15.72
1.3815	15.72
1.3822	15.72
1.383	15.72
1.3838	15.72
1.3846	15.72
1.3854	15.71
1.3862	15.71
1.387	15.71
1.3878	15.71
1.3886	15.7
1.3894	15.69
1.3902	15.66
1.391	15.63
1.3918	15.6
1.3926	15.56
1.3934	15.53
1.3942	15.5
1.395	15.48
1.3958	15.46
1.3966	15.44
1.3974	15.42
1.3982	15.4
1.399	15.39
1.3998	15.38
1.4006	15.37
1.4014	15.36
1.4022	15.35
1.403	15.34
1.4038	15.33
1.4046	15.33
1.4054	15.33
1.4062	15.33
1.4069	15.33
1.4077	15.34
1.4085	15.34
1.4093	15.35
1.4101	15.35
1.4109	15.35
1.4117	15.34
1.4125	15.33
1.4133	15.32
1.4141	15.31
1.4149	15.3
1.4157	15.29
1.4165	15.28
1.4173	15.26
1.4181	15.24
1.4189	15.22
1.4197	15.2
1.4205	15.17
1.4213	15.14
1.4221	15.11
1.4229	15.08
1.4237	15.05
1.4245	15.02
1.4253	14.99
1.4261	14.96
1.4269	14.93
1.4277	14.89
1.4285	14.85
1.4293	14.82
1.4301	14.8
1.4308	14.78
1.4316	14.76
1.4324	14.73
1.4332	14.7
1.434	14.67
1.4348	14.64
1.4356	14.61
1.4364	14.58
1.4372	14.54
1.438	14.5
1.4388	14.45
1.4396	14.41
1.4404	14.37
1.4412	14.34
1.442	14.33
1.4428	14.32
1.4436	14.31
1.4444	14.29
1.4452	14.27
1.446	14.26
1.4468	14.25
1.4476	14.24
1.4484	14.23
1.4492	14.22
1.45	14.21
1.4508	14.2
1.4516	14.19
1.4524	14.18
1.4532	14.17
1.454	14.16
1.4547	14.15
1.4555	14.13
1.4563	14.12
1.4571	14.11
1.4579	14.1
1.4587	14.09
1.4595	14.08
1.4603	14.07
1.4611	14.06
1.4619	14.06
1.4627	14.05
1.4635	14.04
1.4643	14.04
1.4651	14.04
1.4659	14.03
1.4667	14.02
1.4675	14.01
1.4683	14.01
1.4691	14.01
1.4699	14.02
1.4707	14.02
1.4715	14.03
1.4723	14.04
1.4731	14.04
1.4739	14.05
1.4747	14.07
1.4755	14.1
1.4763	14.13
1.4771	14.16
1.4779	14.19
1.4786	14.22
1.4794	14.24
1.4802	14.26
1.481	14.28
1.4818	14.3
1.4826	14.32
1.4834	14.34
1.4842	14.36
1.485	14.39
1.4858	14.42
1.4866	14.46
1.4874	14.49
1.4882	14.52
1.489	14.54
1.4898	14.55
1.4906	14.56
1.4914	14.57
1.4922	14.59
1.493	14.61
1.4938	14.63
1.4946	14.66
1.4954	14.7
1.4962	14.76
1.497	14.84
1.4978	14.93
1.4986	15.03
1.4994	15.14
1.5002	15.26
1.501	15.37
1.5018	15.47
1.5025	15.57
1.5033	15.67
1.5041	15.77
1.5049	15.86
1.5057	15.95
1.5065	16.03
1.5073	16.1
1.5081	16.16
1.5089	16.21
1.5097	16.26
1.5105	16.3
1.5113	16.34
1.5121	16.37
1.5129	16.4
1.5137	16.44
1.5145	16.48
1.5153	16.53
1.5161	16.58
1.5169	16.63
1.5177	16.68
1.5185	16.74
1.5193	16.79
1.5201	16.84
1.5209	16.89
1.5217	16.93
1.5225	16.97
1.5233	17.02
1.5241	17.08
1.5249	17.14
1.5257	17.21
1.5264	17.3
1.5272	17.4
1.528	17.49
1.5288	17.57
1.5296	17.65
1.5304	17.73
1.5312	17.81
1.532	17.89
1.5328	17.97
1.5336	18.05
1.5344	18.14
1.5352	18.24
1.536	18.33
1.5368	18.41
1.5376	18.49
1.5384	18.58
1.5392	18.67
1.54	18.77
1.5408	18.88
1.5416	18.98
1.5424	19.1
1.5432	19.22
1.544	19.33
1.5448	19.44
1.5456	19.55
1.5464	19.66
1.5472	19.78
1.548	19.89
1.5488	20
1.5496	20.11
1.5504	20.23
1.5511	20.34
1.5519	20.45
1.5527	20.56
1.5535	20.66
1.5543	20.75
1.5551	20.84
1.5559	20.92
1.5567	21
1.5575	21.07
1.5583	21.12
1.5591	21.17
1.5599	21.22
1.5607	21.28
1.5615	21.34
1.5623	21.39
1.5631	21.44
1.5639	21.49
1.5647	21.53
1.5655	21.57
1.5663	21.6
1.5671	21.63
1.5679	21.66
1.5687	21.69
1.5695	21.73
1.5703	21.77
1.5711	21.8
1.5719	21.82
1.5727	21.85
1.5735	21.88
1.5743	21.91
1.575	21.94
1.5758	21.95
1.5766	21.94
1.5774	21.91
1.5782	21.87
1.579	21.82
1.5798	21.78
1.5806	21.76
1.5814	21.75
1.5822	21.75
1.583	21.75
1.5838	21.76
1.5846	21.76
1.5854	21.75
1.5862	21.74
1.587	21.74
1.5878	21.75
1.5886	21.77
1.5894	21.79
1.5902	21.82
1.591	21.84
[truncated: 27,065 more rows]

## Sheet: 2H
	A	B	C	D	E	F	G	H	I	J	K
Max	210.75	217.1	155.299	158.56	197.64	124.193	162.01	158.995	157.4	170.022	116.06
Min	18.76	15.66	10.5356	38.48	33.295	13.6356	16.67	32.9312	2.45	18.638	7.97

## Sheet: 2I
Sample	Loss of pigmentation relative to initial intensity (% intensity/day)
1	4.8
2	0.3
3	2.6
4	0.3
5	1.2
6	0.7
7	1.6
8	3.6
9	0.5
10	0.3
11	0.4
12	0.8
13	0.2
14	1.5
15	0.5
16	1.6
17	0.5
18	14.4
19	3.8
20	0.5
21	1.1
22	1.4
23	0.9

## Sheet: 2J
Transition Rates
Graying	Reversal
8.45525	3.58028
0.599678
5.00468
0.383073
1.20906	1.3845
0.603194	1.33677
3.49331	8.94139
5.28924	17.7719
0.794662
0.501518	1.81829
0.470617
0.74037	1.01283
0.30165
3.1262	1.76744
	0.963693
	6.27789
	2.26259
	1.39889
	1.90005
	0.728128
0.696798	4.42232
2.46988	1.079
	0.704991
0.704687	1.45986
	1.59892
	0.846057
	1.04907
	1.96718
	0.795301
23.459	5.31925
8.29359	42.5129
	2.34192
	1.88207
0.885229	3.65846
1.54629	5.08575
1.96899	3.58127
	0.0890809
1.28762	2.68157
	3.72281
	3.76373
