# Supplementary material for: Quantitative mapping of human hair greying and reversal in relation to life stress
Source: eLife. 2021 Jun 22;10:e67437. doi: 10.7554/eLife.67437 (PMC8219384; doi:10.7554/eLife.67437)
Supplement: Figure 3—figure supplement 2—source data 1. [file elife-67437-fig3-figsupp2-data1.xlsx]

## Sheet: A
	ACTB;ACTG1	AFM	ALB	AMBP	APOA1	APOA4	APOB	APOC3	AZGP1	C4A;C4B	CFB	CLU	CP	CSTB	DSG1	GC	HNRNPM	HSPA2	HSPA6;HSPA7	ITIH2	KRT1	KRT16	KRT31	KRT33B	KRT6C	KRT81	KRT83	KRTAP10-5;KRTAP10-1	KRTAP10-6	MDH2	MUC16	ORMDL1;ORMDL2	PHB2	PKP1	RPS14	SEC24C	SERPINA3	SERPINF2	TXN	YWHAG	AVERAGE
Dark	1.14	0.12	0.35	0.56	0.15	0.38	0.5	0.27	0.45	0.33	1.1	0.82	0.26	0.58	0.87	0.41	0.57	2.79	1.31	0.46	0.57	0.84	2.92	2.45	1.93	1.61	1.72	0.44	0.46	1.07	0.03	0.34	0.82	1.47	0.96	0.52	0.62	0.21	0.38	1.06	0.85
Dark	1.57	1.13	0.9	1.07	0.63	1.39	1.49	1.16	1.18	0.83	1.56	1.49	1.44	1.36	1.12	1.15	2.05	0.28	1.64	1.27	1.14	1.59	0.06	0.4	0.81	1.04	0.17	0.38	0.39	0.31	1.86	1.56	0.73	1.28	1.45	1.42	1.88	0.89	1.3	0.98	1.11
White	0.67	1.5	1.44	1.09	1.84	1.44	1.37	1.37	1.44	1.48	0.65	1.19	1.21	0	0.28	1.27	1.17	0	0	1.71	0.44	0.19	0.02	0.2	0	0.54	0	3.28	2.38	0.77	0.83	1.44	0.82	0.59	0	0	1.33	1.71	0.76	0	0.91
White	0.79	0.2	0.48	0.7	0.27	0.39	0.24	0.4	0.63	0.28	0.15	0.31	0.38	1.39	1.88	0.36	0	2.29	1.2	0.29	1.47	1.63	2.69	1.56	2.1	1.52	2.71	0.18	0.45	1.46	0.9	0.6	0.69	1.21	1.02	0.67	0.13	0.59	1.27	2.22	0.94
Dark	0.62	1	1.28	1.07	1.37	0.96	1.04	0.33	0.54	1.28	0.86	0.88	1.13	0	0.61	1.12	0.84	0	0	0.69	0.78	0.11	0.06	1.1	0.83	0.48	1.41	1.73	1.75	0.7	0	0.52	0.68	0.25	0	0.51	1.42	0.88	0.9	0	0.74
Dark	1.21	2.04	1.55	1.51	1.75	1.44	1.37	2.46	1.76	1.81	1.67	1.31	1.58	2.67	1.24	1.69	1.37	0.63	1.85	1.58	1.6	1.64	0.25	0.29	0.32	0.81	0	0	0.57	1.69	2.38	1.54	2.26	1.21	2.57	2.87	0.61	1.72	1.39	1.74	1.45
