# Supplementary material for: Quantitative mapping of human hair greying and reversal in relation to life stress
Source: eLife. 2021 Jun 22;10:e67437. doi: 10.7554/eLife.67437 (PMC8219384; doi:10.7554/eLife.67437)
Supplement: Figure 4—figure supplement 1—source data 1. [file elife-67437-fig4-figsupp1-data1.xlsx]

## Sheet: 1
Donor 1			Donor 2			Pooled bulbs
Dark	White		Dark	White		Dark	White
	1035.66		1403.36	1429.54		1213.82	1253.43
1195.17	1125.49		3389.84	1668.5		1179.53	1302.74
997.15	1441.81		1903.8	1775.9
1223.95	1657.74		2213.32	1844.06
1370.99	1302.74		4303.62	1963.67
1178.44	778.38		2390.34	1245.64
1293.44	1174.37		1450.83	1369.72
1263.32	1909.53		1971.85	2610.9
1619.13	1666.96		1872.82	2673.78
1631.9			2690.51
