# Supplementary material for: Quantitative mapping of human hair greying and reversal in relation to life stress
Source: eLife. 2021 Jun 22;10:e67437. doi: 10.7554/eLife.67437 (PMC8219384; doi:10.7554/eLife.67437)
Supplement: Figure 4—source data 1. [file elife-67437-fig4-data1.xlsx]

## Sheet: 4C
CPT1A							ACOT7							SOD1							CFL1							PGK1							KRTAP3-1							KRTAP4-3
Exp 1			Exp 2				Exp 1			Exp 2				Exp 1			Exp 2				Exp 1			Exp 2				Exp 1			Exp 2				Exp 1			Exp 2				Exp 1			Exp 2
Dark	White		Dark	White			Dark	White		Dark	White			Dark	White		Dark	White			Dark	White		Dark	White			Dark	White		Dark	White			Dark	White		Dark	White			Dark	White		Dark	White
0.04	0.08		5663900	4626000			0.19	0.43		0	7283200			0.22	0.83		9065500	121370000			0.69	0.69		3966100	26724000			0.17	0.49		0	0			6.09	3.05		1656000000	2221500000			0.5	0.31		200450000	364790000
0	0.08		0	0			0.09	0.19		12028000	9407300			0.5	0.5		2308800	115170000			0.19	1.41		31960000	74701000			0.27	0.62		0	11525000			8.38	6.09		15224000000	405050000			0.31	0.31		4217500000	1443100000
0.04	0.08		0	0			0.09	0.3		0	0			0.22	1.25		20401000	2524000			0.69	1.41		22648000	25619000			0.9	0.75		0	6701200			8.38	4.36		1628600000	656100000			0.5	0.5		1565600000	215900000
0	0.04		0	1976600			0.09	0.3		0	8522600			0.22	0.5		233995	19985000			0.69	1.02		30411000	63664000			0.38	0.75		0	2010800			6.09	6.09		6734900000	1557700000			0.5	0.31		50051000	377310000
			0	1942700						0	1028000						4469900	8672500						83004000	37511000						0	22818000						99518000	1000400000						250120000	452550000
			0							0							9489000							6552100							0							936410000							165090000

## Sheet: 4D
ND1 Cycle threshold (Ct)
Donor 1			Donor 2
Dark	White		Dark	White
25.35	25.49		23.19	20.87
24.82	26.35		23.92	22.6
26.82	25.24		24.84	23.97
26.18	24.78		21.15	23.19
20.82	20.14		21.87	23.51
26.3	26.47		21.72	23.02
26.65	25.71		21.29	20.86
25.64	24.63		24.19	23.2
25.18	25.29		22.72	23.03
21.08	24.93		24.05

## Sheet: 4E
KEGG categories	Exp1	Exp2	DT Comp 1	Exp 1 D	Exp 2 D	DT comp 2
Carbon metabolism	3.69897	2.71857	5.04576
Biosynthesis of amino acids	2.17393	2.5573	2.08092
Glycolysis / Gluconeogenesis		3.53613	4.69897
Metabolic pathways	3.69897	1.45067
Pyruvate metabolism		2.30407	2.31876
Ribosome	21.4202
Estrogen signaling pathway		10.4833
Fatty acid metabolism	3.69897
Legionellosis		2.78049
Arrhythmogenic right ventricular cardiomyopathy (ARVC)		2.5573
Citrate cycle (TCA cycle)			2.38722
Tryptophan metabolism			2.31876
Type II diabetes mellitus			2.31876
Lysine degradation			2.17393
Protein processing in ER	2.17393
Central carbon metabolism cancer			2.14874
Calcium signaling pathway		2.05885
Pathogenic Escherichia coli infection		1.9762
Biosynthesis of uns. fatty acids	1.95861
Fatty acid elongation	1.95861
Apoptosis		1.90414
Longevity regulating pathway		1.90414
Spliceosome		1.90414
Inositol phosphate metabolism		1.80005
Antigen processing and presentation		1.79741
Cellular senescence		1.77245
Necroptosis		1.77245
CGMP-PKG signaling pathway		1.76921
AMPK signaling pathway	1.74473
Oxidative phosphorylation	1.69897
Glyoxylate and dicarboxylate metabolism		1.65767
Phosphatidylinositol signaling system		1.60755
Glucagon signaling pathway		1.5982
Ferroptosis		1.49878
Cell cycle		1.454
Fatty acid degradation		1.454
Oocyte meiosis		1.454
Cysteine and methionine metabolism		1.45067
Valine, leucine and isoleucine degradation		1.4486
Arginine and proline metabolism		1.44407
Huntington disease		1.60755		1.72125		1.31876
PPAR signaling pathway		1.80005			1.49997
Chagas disease (American trypanosomiasis)					1.31011
Neuroactive ligand-receptor interaction						1.49485
Systemic lupus erythematosus						1.49485
AGE-RAGE signaling pathway in diabetic complications						1.5376
Tuberculosis				1.72125
Autophagy				1.74473
African trypanosomiasis					1.98224
Lysosome				2.82391
Fat digestion and absorption					3.40185
Vitamin digestion and absorption					3.9825
Cholesterol metabolism					6.2161
Pertussis					1.49997	1.65758
Parkinson disease				1.74473		1.49485
Staphylococcus aureus infection					7.19481	1.65758
Complement and coagulation cascades					13.5474	2.60206

## Sheet: 4F
	Top KEGG Category	Complement and Coagulation cascade
Top G0 Biological Process Category		IGHA1	ITIH1	HRNR	CFH	APCS	CFI	VTN	APOE	SERPINF2	ITIH2	ITIH4	AMBP	PLG	SERPINA3	APOA4	APOC3	HPX	SERPING1	KNG1	CP	C4AC4B	ALB	GC	APOH	GSN	IGKC	C3	unknown 7	KRT38	KRTAP3-1	SERPINC1	SLC25A11	unknown 8	CFB	APOA1	APOB	AHSG	AFM	AZGP1	DCD	UQCRC2	OFD1	ORMDL1ORMDL2	CPT1A	CLU	DSG1	YWHAB	unknown 5
Negative regulation of hydrolase activity	IGHA1	1	0.88397	0.58978	0.73963	0.74616	0.54589	0.38373	0.83835	0.57664	0.50853	0.47934	0.54428	0.57917	0.72884	0.54398	0.43784	0.46859	0.26774	0.43989	0.4494	0.53803	0.50465	0.38196	0.2137	0.35825	0.38156	0.36909	0.24831	0.43842	0.33722	0.19582	0.29872	0.12971	0.52912	0.52797	0.50044	0.39891	0.49348	0.48736	0.32388	0.27573	0.66514	0.5899	0.81722	0.76204	0.65242	0.064939	-0.17733
	ITIH1	0.88397	1	0.67098	0.5836	0.61512	0.64187	0.5134	0.83173	0.63187	0.56748	0.54503	0.50613	0.76285	0.82453	0.72675	0.61025	0.69812	0.5352	0.69371	0.66208	0.76076	0.7383	0.61718	0.46477	0.52672	0.5988	0.58754	0.54146	0.54399	0.34974	0.32764	0.42819	0.47468	0.55681	0.62224	0.62274	0.45825	0.59606	0.52724	0.45833	0.25513	0.67843	0.62775	0.57617	0.68203	0.79775	0.23589	-0.048055
	HRNR	0.58978	0.67098	1	0.68323	0.70349	0.15641	0.22173	0.40121	0.46009	0.34704	0.083857	0.30498	0.43676	0.60911	0.69536	0.74182	0.66282	0.56257	0.56197	0.50655	0.57978	0.66872	0.58064	0.47882	0.59288	0.57699	0.49036	0.66487	-0.040453	0.081386	0.22705	0.37505	0.38149	0.51348	0.4862	0.49336	0.39664	0.54258	0.5269	0.6012	0.023255	0.68185	0.11695	0.2727	0.55277	0.48186	-0.0064459	-0.35921
	CFH	0.73963	0.5836	0.68323	1	0.99762	0.17168	0.035144	0.64066	0.48226	0.49371	0.31796	0.42602	0.32188	0.3821	0.41689	0.32014	0.32432	0.20542	0.43526	0.40676	0.37911	0.38812	0.37442	0.30602	0.36324	0.40188	0.3066	0.16575	0.011538	0.31055	0.064061	0.078223	0.022836	0.42482	0.38678	0.32957	0.34164	0.30808	0.30234	0.21429	0.22523	0.65911	0.038676	0.42019	0.57022	0.48536	-0.23904	-0.36539
	APCS	0.74616	0.61512	0.70349	0.99762	1	0.17819	0.04139	0.65042	0.48955	0.49741	0.32687	0.42924	0.35169	0.39501	0.43268	0.3336	0.34201	0.2214	0.45634	0.4265	0.40235	0.40854	0.39008	0.31587	0.36615	0.41453	0.32502	0.20267	0.026136	0.32467	0.074117	0.086532	0.060899	0.43295	0.39788	0.3479	0.34668	0.3216	0.31591	0.2382	0.23206	0.68485	0.04443	0.39953	0.578	0.51513	-0.23442	-0.36417
	CFI	0.54589	0.64187	0.15641	0.17168	0.17819	1	0.79719	0.71349	0.55777	0.52663	0.48043	0.38214	0.71019	0.66609	0.54761	0.45358	0.54818	0.4348	0.54794	0.53171	0.63492	0.61149	0.52699	0.40145	0.39388	0.44224	0.33381	0.13153	0.61383	0.46238	0.25731	0.39215	0.48317	0.43848	0.51944	0.56285	0.41376	0.53826	0.41893	0.25234	0.66728	0.39518	0.6491	0.58595	0.26449	0.46305	0.58136	0.39494
	VTN	0.38373	0.5134	0.22173	0.035144	0.04139	0.79719	1	0.50084	0.68685	0.62512	0.58017	0.51795	0.85185	0.75975	0.74686	0.66104	0.72567	0.67993	0.55624	0.72732	0.77519	0.72795	0.62175	0.47559	0.5674	0.52768	0.58757	0.38376	0.40382	0.33214	0.56392	0.48333	0.58228	0.55915	0.66486	0.69549	0.51601	0.66348	0.53841	0.41498	0.43356	0.24085	0.5266	0.44286	0.053527	0.31341	0.68063	0.22959
	APOE	0.83835	0.83173	0.40121	0.64066	0.65042	0.71349	0.50084	1	0.7353	0.69989	0.5717	0.55843	0.73644	0.7598	0.62318	0.45672	0.57591	0.45768	0.68229	0.64777	0.722	0.64982	0.63665	0.50697	0.54409	0.62212	0.46505	0.32553	0.71385	0.64838	0.28868	0.42431	0.39279	0.62964	0.63981	0.61155	0.55936	0.5617	0.44566	0.17787	0.33042	0.41955	0.4488	0.564	0.58164	0.57507	0.262	0.15358
	SERPINF2	0.57664	0.63187	0.46009	0.48226	0.48955	0.55777	0.68685	0.7353	1	0.92331	0.655	0.72375	0.81709	0.80044	0.84885	0.76584	0.68106	0.67277	0.73779	0.83362	0.85731	0.79477	0.77595	0.62339	0.65165	0.70011	0.56851	0.44239	0.42474	0.48853	0.51772	0.71091	0.59894	0.7416	0.7997	0.73146	0.74471	0.76089	0.64519	0.44475	0.2058	0.35697	0.21489	0.3483	0.14905	0.32791	0.66172	0.34911
	ITIH2	0.50853	0.56748	0.34704	0.49371	0.49741	0.52663	0.62512	0.69989	0.92331	1	0.74189	0.53387	0.74567	0.6369	0.78976	0.58332	0.60797	0.63992	0.78759	0.8417	0.79903	0.70705	0.70987	0.62722	0.60085	0.64989	0.66965	0.29983	0.44402	0.50226	0.67254	0.66119	0.61513	0.7358	0.85727	0.75682	0.81017	0.74048	0.61778	0.46818	0.19592	0.30879	0.29615	0.2773	0.186	0.49348	0.57744	0.30592
	ITIH4	0.47934	0.54503	0.083857	0.31796	0.32687	0.48043	0.58017	0.5717	0.655	0.74189	1	0.69752	0.66196	0.51723	0.5622	0.3365	0.49232	0.45434	0.57523	0.75076	0.63721	0.54639	0.5001	0.45637	0.40896	0.49432	0.64743	0.18042	0.30021	0.10487	0.39921	0.16693	0.2391	0.22945	0.45712	0.34312	0.27878	0.25901	0.12537	0.06196	0.15342	0.25417	0.46054	0.32458	0.029252	0.54507	0.39348	0.11192
	AMBP	0.54428	0.50613	0.30498	0.42602	0.42924	0.38214	0.51795	0.55843	0.72375	0.53387	0.69752	1	0.61967	0.66328	0.54607	0.58034	0.48593	0.38414	0.36873	0.60966	0.59197	0.57685	0.5276	0.37826	0.43467	0.50432	0.31479	0.31027	0.075444	0.070909	-0.018624	0.1422	0.048166	0.18906	0.24563	0.18259	0.10374	0.1955	0.10162	-0.067807	0.18001	0.33829	0.086963	0.40587	-0.077621	0.092012	0.38681	0.097748
	PLG	0.57917	0.76285	0.43676	0.32188	0.35169	0.71019	0.85185	0.73644	0.81709	0.74567	0.66196	0.61967	1	0.84055	0.83399	0.69338	0.7936	0.73335	0.73407	0.87056	0.91707	0.83114	0.7517	0.57825	0.63859	0.67654	0.70381	0.60912	0.5315	0.55598	0.58447	0.51237	0.71073	0.69576	0.76902	0.80124	0.61775	0.72747	0.60331	0.46167	0.36764	0.41115	0.41731	0.33137	0.25932	0.51796	0.51549	0.13209
	SERPINA3	0.72884	0.82453	0.60911	0.3821	0.39501	0.66609	0.75975	0.7598	0.80044	0.6369	0.51723	0.66328	0.84055	1	0.88887	0.85807	0.86974	0.76417	0.71007	0.77311	0.89119	0.88237	0.79443	0.62566	0.76978	0.76001	0.64041	0.67791	0.5365	0.32015	0.43083	0.62301	0.52611	0.66399	0.70243	0.68747	0.55678	0.70938	0.58139	0.41235	0.11053	0.36824	0.50307	0.56074	0.43787	0.44092	0.5121	0.1053
	APOA4	0.54398	0.72675	0.69536	0.41689	0.43268	0.54761	0.74686	0.62318	0.84885	0.78976	0.5622	0.54607	0.83399	0.88887	1	0.91856	0.94368	0.92262	0.88028	0.92206	0.9625	0.96384	0.90738	0.80196	0.87281	0.86479	0.82819	0.73777	0.36833	0.28094	0.63431	0.69433	0.7132	0.72535	0.82641	0.78294	0.69946	0.79517	0.64462	0.5903	0.059295	0.38294	0.36899	0.29985	0.31154	0.51712	0.54666	0.086873
	APOC3	0.43784	0.61025	0.74182	0.32014	0.3336	0.45358	0.66104	0.45672	0.76584	0.58332	0.3365	0.58034	0.69338	0.85807	0.91856	1	0.87563	0.84058	0.71684	0.75895	0.84718	0.91366	0.84851	0.72047	0.8052	0.79288	0.59698	0.74551	0.1791	0.11157	0.37485	0.66598	0.60516	0.57821	0.62304	0.60453	0.52257	0.68981	0.56666	0.53149	0.037317	0.38487	0.19265	0.26281	0.1595	0.2549	0.5878	0.14573
	HPX	0.46859	0.69812	0.66282	0.32432	0.34201	0.54818	0.72567	0.57591	0.68106	0.60797	0.49232	0.48593	0.7936	0.86974	0.94368	0.87563	1	0.96279	0.867	0.89306	0.93889	0.96927	0.92676	0.85979	0.93709	0.91749	0.85465	0.82757	0.36547	0.19623	0.5263	0.5201	0.64858	0.57595	0.67668	0.65923	0.5154	0.63656	0.44702	0.41653	0.011377	0.27649	0.36674	0.23223	0.3135	0.4937	0.40995	-0.028664
	SERPING1	0.26774	0.5352	0.56257	0.20542	0.2214	0.4348	0.67993	0.45768	0.67277	0.63992	0.45434	0.38414	0.73335	0.76417	0.92262	0.84058	0.96279	1	0.88345	0.89939	0.91534	0.93333	0.93785	0.9113	0.94924	0.92554	0.87472	0.82763	0.34514	0.20508	0.61901	0.58512	0.72636	0.58523	0.69762	0.6627	0.57879	0.64186	0.43514	0.41845	-0.10493	0.10021	0.23383	0.023662	0.16593	0.39186	0.46711	0.067143
	KNG1	0.43989	0.69371	0.56197	0.43526	0.45634	0.54794	0.55624	0.68229	0.73779	0.78759	0.57523	0.36873	0.73407	0.71007	0.88028	0.71684	0.867	0.88345	1	0.91199	0.91433	0.91001	0.93538	0.92209	0.85633	0.92267	0.8341	0.66174	0.49544	0.37119	0.56324	0.59355	0.75193	0.60982	0.74672	0.68504	0.65455	0.6501	0.44705	0.41213	0.053539	0.29243	0.31145	0.082449	0.31459	0.63167	0.43505	0.18708
	CP	0.4494	0.66208	0.50655	0.40676	0.4265	0.53171	0.72732	0.64777	0.83362	0.8417	0.75076	0.60966	0.87056	0.77311	0.92206	0.75895	0.89306	0.89939	0.91199	1	0.96194	0.92287	0.91248	0.84975	0.84602	0.88605	0.88719	0.67596	0.37216	0.33255	0.61629	0.50339	0.67934	0.60223	0.75067	0.6931	0.60553	0.63208	0.43992	0.37862	0.09762	0.28803	0.28256	0.13848	0.15815	0.53492	0.47832	0.089588
	C4AC4B	0.53803	0.76076	0.57978	0.37911	0.40235	0.63492	0.77519	0.722	0.85731	0.79903	0.63721	0.59197	0.91707	0.89119	0.9625	0.84718	0.93889	0.91534	0.91433	0.96194	1	0.97168	0.93906	0.83187	0.86281	0.89657	0.82717	0.74536	0.50203	0.40932	0.59397	0.62914	0.75053	0.69184	0.7956	0.77002	0.66038	0.73952	0.55898	0.45946	0.13515	0.33353	0.36173	0.24226	0.27368	0.53048	0.54882	0.16332
	ALB	0.50465	0.7383	0.66872	0.38812	0.40854	0.61149	0.72795	0.64982	0.79477	0.70705	0.54639	0.57685	0.83114	0.88237	0.96384	0.91366	0.96927	0.93333	0.91001	0.92287	0.97168	1	0.96469	0.87658	0.90064	0.93037	0.7868	0.77055	0.38179	0.26472	0.46955	0.58952	0.69856	0.59631	0.69925	0.67386	0.56146	0.67494	0.48804	0.43654	0.11813	0.37396	0.31924	0.23352	0.24857	0.48907	0.52953	0.13575
	GC	0.38196	0.61718	0.58064	0.37442	0.39008	0.52699	0.62175	0.63665	0.77595	0.70987	0.5001	0.5276	0.7517	0.79443	0.90738	0.84851	0.92676	0.93785	0.93538	0.91248	0.93906	0.96469	1	0.95807	0.94068	0.98299	0.76214	0.7573	0.40281	0.31722	0.43416	0.57376	0.68829	0.56622	0.65477	0.60957	0.56161	0.60337	0.38285	0.29799	0.023795	0.20482	0.15235	0.070772	0.16523	0.37974	0.49392	0.20431
	APOH	0.2137	0.46477	0.47882	0.30602	0.31587	0.40145	0.47559	0.50697	0.62339	0.62722	0.45637	0.37826	0.57825	0.62566	0.80196	0.72047	0.85979	0.9113	0.92209	0.84975	0.83187	0.87658	0.95807	1	0.93269	0.97425	0.76661	0.69468	0.33028	0.19059	0.39299	0.46317	0.60893	0.41549	0.53664	0.46251	0.45983	0.444	0.1977	0.1658	-0.10847	0.050067	0.081873	-0.087176	0.092012	0.35133	0.39047	0.17603
	GSN	0.35825	0.52672	0.59288	0.36324	0.36615	0.39388	0.5674	0.54409	0.65165	0.60085	0.40896	0.43467	0.63859	0.76978	0.87281	0.8052	0.93709	0.94924	0.85633	0.84602	0.86281	0.90064	0.94068	0.93269	1	0.96495	0.81296	0.78173	0.33628	0.20263	0.47712	0.49677	0.54429	0.54936	0.61936	0.55963	0.51592	0.54437	0.32565	0.24387	-0.16291	0.06014	0.16431	0.11109	0.25898	0.32884	0.31889	-0.019814
	IGKC	0.38156	0.5988	0.57699	0.40188	0.41453	0.44224	0.52768	0.62212	0.70011	0.64989	0.49432	0.50432	0.67654	0.76001	0.86479	0.79288	0.91749	0.92554	0.92267	0.88605	0.89657	0.93037	0.98299	0.97425	0.96495	1	0.78652	0.77151	0.38397	0.24207	0.39096	0.48591	0.58948	0.4933	0.58569	0.52144	0.48339	0.50279	0.27115	0.1955	-0.095716	0.13879	0.13988	0.051865	0.21163	0.39025	0.36811	0.1026
	C3	0.36909	0.58754	0.49036	0.3066	0.32502	0.33381	0.58757	0.46505	0.56851	0.66965	0.64743	0.31479	0.70381	0.64041	0.82819	0.59698	0.85465	0.87472	0.8341	0.88719	0.82717	0.7868	0.76214	0.76661	0.81296	0.78652	1	0.70331	0.33587	0.16052	0.75209	0.40096	0.59682	0.53959	0.7141	0.64769	0.54484	0.55134	0.37982	0.4174	-0.15599	0.15427	0.41068	0.087581	0.32909	0.65788	0.22348	-0.19491
	unknown 7	0.24831	0.54146	0.66487	0.16575	0.20267	0.13153	0.38376	0.32553	0.44239	0.29983	0.18042	0.31027	0.60912	0.67791	0.73777	0.74551	0.82757	0.82763	0.66174	0.67596	0.74536	0.77055	0.7573	0.69468	0.78173	0.77151	0.70331	1	0.25968	0.13944	0.40552	0.42888	0.61101	0.45529	0.47079	0.49466	0.3527	0.47273	0.3384	0.36487	-0.29954	0.11988	0.056878	-0.12293	0.26518	0.30098	0.16986	-0.15575
	KRT38	0.43842	0.54399	-0.040453	0.011538	0.026136	0.61383	0.40382	0.71385	0.42474	0.44402	0.30021	0.075444	0.5315	0.5365	0.36833	0.1791	0.36547	0.34514	0.49544	0.37216	0.50203	0.38179	0.40281	0.33028	0.33628	0.38397	0.33587	0.25968	1	0.64987	0.43342	0.55884	0.51458	0.55108	0.56494	0.5659	0.55435	0.51708	0.40544	0.15013	0.062649	-0.088366	0.55068	0.2997	0.47638	0.41587	0.37526	0.4329
	KRTAP3-1	0.33722	0.34974	0.081386	0.31055	0.32467	0.46238	0.33214	0.64838	0.48853	0.50226	0.10487	0.070909	0.55598	0.32015	0.28094	0.11157	0.19623	0.20508	0.37119	0.33255	0.40932	0.26472	0.31722	0.19059	0.20263	0.24207	0.16052	0.13944	0.64987	1	0.40954	0.41954	0.55172	0.72851	0.60858	0.68558	0.68141	0.59942	0.56592	0.2767	0.43785	0.13798	0.038612	0.10799	0.33646	0.20548	0.17443	0.25159
	SERPINC1	0.19582	0.32764	0.22705	0.064061	0.074117	0.25731	0.56392	0.28868	0.51772	0.67254	0.39921	-0.018624	0.58447	0.43083	0.63431	0.37485	0.5263	0.61901	0.56324	0.61629	0.59397	0.46955	0.43416	0.39299	0.47712	0.39096	0.75209	0.40552	0.43342	0.40954	1	0.64314	0.6954	0.77066	0.87161	0.83837	0.82361	0.77352	0.71111	0.68404	-0.089593	0.0030928	0.40679	0.076534	0.29647	0.47927	0.35776	0.0090249
	SLC25A11	0.29872	0.42819	0.37505	0.078223	0.086532	0.39215	0.48333	0.42431	0.71091	0.66119	0.16693	0.1422	0.51237	0.62301	0.69433	0.66598	0.5201	0.58512	0.59355	0.50339	0.62914	0.58952	0.57376	0.46317	0.49677	0.48591	0.40096	0.42888	0.55884	0.41954	0.64314	1	0.75185	0.79298	0.80796	0.76707	0.85795	0.87663	0.8164	0.69342	-0.071474	0.1038	0.29206	0.18691	0.24843	0.23567	0.72845	0.52651
	unknown 8	0.12971	0.47468	0.38149	0.022836	0.060899	0.48317	0.58228	0.39279	0.59894	0.61513	0.2391	0.048166	0.71073	0.52611	0.7132	0.60516	0.64858	0.72636	0.75193	0.67934	0.75053	0.69856	0.68829	0.60893	0.54429	0.58948	0.59682	0.61101	0.51458	0.55172	0.6954	0.75185	1	0.71188	0.77582	0.82403	0.76069	0.80623	0.69678	0.69196	0.18049	0.21168	0.21566	-0.1426	0.14187	0.42456	0.59301	0.3838
	CFB	0.52912	0.55681	0.51348	0.42482	0.43295	0.43848	0.55915	0.62964	0.7416	0.7358	0.22945	0.18906	0.69576	0.66399	0.72535	0.57821	0.57595	0.58523	0.60982	0.60223	0.69184	0.59631	0.56622	0.41549	0.54936	0.4933	0.53959	0.45529	0.55108	0.72851	0.77066	0.79298	0.71188	1	0.94839	0.95747	0.95725	0.95336	0.91649	0.72364	0.15588	0.28337	0.28067	0.32482	0.52071	0.39872	0.37586	0.098932
	APOA1	0.52797	0.62224	0.4862	0.38678	0.39788	0.51944	0.66486	0.63981	0.7997	0.85727	0.45712	0.24563	0.76902	0.70243	0.82641	0.62304	0.67668	0.69762	0.74672	0.75067	0.7956	0.69925	0.65477	0.53664	0.61936	0.58569	0.7141	0.47079	0.56494	0.60858	0.87161	0.80796	0.77582	0.94839	1	0.9713	0.95962	0.95306	0.87652	0.74747	0.14015	0.30395	0.43329	0.3229	0.46166	0.56066	0.49014	0.14759
	APOB	0.50044	0.62274	0.49336	0.32957	0.3479	0.56285	0.69549	0.61155	0.73146	0.75682	0.34312	0.18259	0.80124	0.68747	0.78294	0.60453	0.65923	0.6627	0.68504	0.6931	0.77002	0.67386	0.60957	0.46251	0.55963	0.52144	0.64769	0.49466	0.5659	0.68558	0.83837	0.76707	0.82403	0.95747	0.9713	1	0.93014	0.96796	0.91197	0.78697	0.26356	0.3533	0.41727	0.30437	0.47166	0.53374	0.45747	0.11893
	AHSG	0.39891	0.45825	0.39664	0.34164	0.34668	0.41376	0.51601	0.55936	0.74471	0.81017	0.27878	0.10374	0.61775	0.55678	0.69946	0.52257	0.5154	0.57879	0.65455	0.60553	0.66038	0.56146	0.56161	0.45983	0.51592	0.48339	0.54484	0.3527	0.55435	0.68141	0.82361	0.85795	0.76069	0.95725	0.95962	0.93014	1	0.94005	0.88607	0.72737	0.10873	0.19797	0.27144	0.21182	0.39955	0.40366	0.48587	0.26425
	AFM	0.49348	0.59606	0.54258	0.30808	0.3216	0.53826	0.66348	0.5617	0.76089	0.74048	0.25901	0.1955	0.72747	0.70938	0.79517	0.68981	0.63656	0.64186	0.6501	0.63208	0.73952	0.67494	0.60337	0.444	0.54437	0.50279	0.55134	0.47273	0.51708	0.59942	0.77352	0.87663	0.80623	0.95336	0.95306	0.96796	0.94005	1	0.96076	0.83937	0.21895	0.3711	0.39132	0.34402	0.43607	0.44407	0.5641	0.225
	AZGP1	0.48736	0.52724	0.5269	0.30234	0.31591	0.41893	0.53841	0.44566	0.64519	0.61778	0.12537	0.10162	0.60331	0.58139	0.64462	0.56666	0.44702	0.43514	0.44705	0.43992	0.55898	0.48804	0.38285	0.1977	0.32565	0.27115	0.37982	0.3384	0.40544	0.56592	0.71111	0.8164	0.69678	0.91649	0.87652	0.91197	0.88607	0.96076	1	0.90285	0.25093	0.44663	0.36455	0.38212	0.46728	0.39808	0.46395	0.14745
	DCD	0.32388	0.45833	0.6012	0.21429	0.2382	0.25234	0.41498	0.17787	0.44475	0.46818	0.06196	-0.067807	0.46167	0.41235	0.5903	0.53149	0.41653	0.41845	0.41213	0.37862	0.45946	0.43654	0.29799	0.1658	0.24387	0.1955	0.4174	0.36487	0.15013	0.2767	0.68404	0.69342	0.69196	0.72364	0.74747	0.78697	0.72737	0.83937	0.90285	1	0.17784	0.5366	0.35632	0.20958	0.39392	0.49344	0.36819	0.0071634
	UQCRC2	0.27573	0.25513	0.023255	0.22523	0.23206	0.66728	0.43356	0.33042	0.2058	0.19592	0.15342	0.18001	0.36764	0.11053	0.059295	0.037317	0.011377	-0.10493	0.053539	0.09762	0.13515	0.11813	0.023795	-0.10847	-0.16291	-0.095716	-0.15599	-0.29954	0.062649	0.43785	-0.089593	-0.071474	0.18049	0.15588	0.14015	0.26356	0.10873	0.21895	0.25093	0.17784	1	0.59191	0.2015	0.36655	0.0083525	0.19496	0.21367	0.17542
	OFD1	0.66514	0.67843	0.68185	0.65911	0.68485	0.39518	0.24085	0.41955	0.35697	0.30879	0.25417	0.33829	0.41115	0.36824	0.38294	0.38487	0.27649	0.10021	0.29243	0.28803	0.33353	0.37396	0.20482	0.050067	0.06014	0.13879	0.15427	0.11988	-0.088366	0.13798	0.0030928	0.1038	0.21168	0.28337	0.30395	0.3533	0.19797	0.3711	0.44663	0.5366	0.59191	1	0.31039	0.48082	0.42779	0.60024	0.041059	-0.19804
	ORMDL1ORMDL2	0.5899	0.62775	0.11695	0.038676	0.04443	0.6491	0.5266	0.4488	0.21489	0.29615	0.46054	0.086963	0.41731	0.50307	0.36899	0.19265	0.36674	0.23383	0.31145	0.28256	0.36173	0.31924	0.15235	0.081873	0.16431	0.13988	0.41068	0.056878	0.55068	0.038612	0.40679	0.29206	0.21566	0.28067	0.43329	0.41727	0.27144	0.39132	0.36455	0.35632	0.2015	0.31039	1	0.70636	0.55868	0.71005	0.28277	0.02648
	CPT1A	0.81722	0.57617	0.2727	0.42019	0.39953	0.58595	0.44286	0.564	0.3483	0.2773	0.32458	0.40587	0.33137	0.56074	0.29985	0.26281	0.23223	0.023662	0.082449	0.13848	0.24226	0.23352	0.070772	-0.087176	0.11109	0.051865	0.087581	-0.12293	0.2997	0.10799	0.076534	0.18691	-0.1426	0.32482	0.3229	0.30437	0.21182	0.34402	0.38212	0.20958	0.36655	0.48082	0.70636	1	0.57504	0.37922	0.15506	-0.097301
	CLU	0.76204	0.68203	0.55277	0.57022	0.578	0.26449	0.053527	0.58164	0.14905	0.186	0.029252	-0.077621	0.25932	0.43787	0.31154	0.1595	0.3135	0.16593	0.31459	0.15815	0.27368	0.24857	0.16523	0.092012	0.25898	0.21163	0.32909	0.26518	0.47638	0.33646	0.29647	0.24843	0.14187	0.52071	0.46166	0.47166	0.39955	0.43607	0.46728	0.39392	0.0083525	0.42779	0.55868	0.57504	1	0.67976	-0.29709	-0.40303
	DSG1	0.65242	0.79775	0.48186	0.48536	0.51513	0.46305	0.31341	0.57507	0.32791	0.49348	0.54507	0.092012	0.51796	0.44092	0.51712	0.2549	0.4937	0.39186	0.63167	0.53492	0.53048	0.48907	0.37974	0.35133	0.32884	0.39025	0.65788	0.30098	0.41587	0.20548	0.47927	0.23567	0.42456	0.39872	0.56066	0.53374	0.40366	0.44407	0.39808	0.49344	0.19496	0.60024	0.71005	0.37922	0.67976	1	0.012909	-0.2064
	YWHAB	0.064939	0.23589	-0.0064459	-0.23904	-0.23442	0.58136	0.68063	0.262	0.66172	0.57744	0.39348	0.38681	0.51549	0.5121	0.54666	0.5878	0.40995	0.46711	0.43505	0.47832	0.54882	0.52953	0.49392	0.39047	0.31889	0.36811	0.22348	0.16986	0.37526	0.17443	0.35776	0.72845	0.59301	0.37586	0.49014	0.45747	0.48587	0.5641	0.46395	0.36819	0.21367	0.041059	0.28277	0.15506	-0.29709	0.012909	1	0.80167
	unknown 5	-0.17733	-0.048055	-0.35921	-0.36539	-0.36417	0.39494	0.22959	0.15358	0.34911	0.30592	0.11192	0.097748	0.13209	0.1053	0.086873	0.14573	-0.028664	0.067143	0.18708	0.089588	0.16332	0.13575	0.20431	0.17603	-0.019814	0.1026	-0.19491	-0.15575	0.4329	0.25159	0.0090249	0.52651	0.3838	0.098932	0.14759	0.11893	0.26425	0.225	0.14745	0.0071634	0.17542	-0.19804	0.02648	-0.097301	-0.40303	-0.2064	0.80167	1
	KRTAP10-4	-0.23006	-0.076137	-0.54242	-0.43374	-0.43229	0.456	0.25756	0.16633	0.2125	0.31371	0.20548	-0.1076	0.14259	-0.014425	0.0081957	-0.084893	-0.058361	0.055558	0.22051	0.10624	0.13069	0.053253	0.13429	0.16525	-0.053224	0.054864	-0.055147	-0.24782	0.56491	0.34189	0.18341	0.39738	0.41011	0.090537	0.19255	0.16908	0.28434	0.18252	0.081343	-0.039759	0.21769	-0.30756	0.19333	-0.13626	-0.31452	-0.018022	0.66264	0.89405
	PLP2	0.11782	0.13037	0.031886	-0.11021	-0.1183	0.38537	0.51727	0.2101	0.64084	0.59035	0.1891	0.20419	0.3684	0.39568	0.4436	0.46331	0.20249	0.27761	0.25849	0.2886	0.37198	0.31421	0.27555	0.14406	0.15766	0.14169	0.088572	0.0071463	0.33455	0.31459	0.4895	0.84045	0.51901	0.58973	0.61278	0.57367	0.69117	0.70772	0.70576	0.55998	0.15215	0.049592	0.21297	0.24281	-0.11414	-0.049966	0.86028	0.68538
	KRTAP3-2	-0.080155	-0.0034587	0.0030414	-0.11684	-0.12018	0.31512	0.27483	0.11433	0.37492	0.44683	-0.12219	-0.27738	0.17338	0.10592	0.26349	0.22555	0.067524	0.19034	0.27718	0.1265	0.20995	0.16469	0.188	0.14124	0.069633	0.063036	0.016318	-0.077008	0.3652	0.48519	0.49807	0.77016	0.63554	0.59334	0.57889	0.58622	0.73702	0.6793	0.68393	0.60474	0.22517	0.012708	0.097755	-0.020184	0.0010233	0.029862	0.62244	0.64274
	NDUFS1	-0.39941	-0.17752	-0.178	-0.1544	-0.1283	-0.10366	-0.065775	-0.057387	0.23082	0.15543	0.15053	0.29284	0.11305	-0.11931	0.0099262	0.097194	-0.024652	0.1006	0.16685	0.20744	0.13929	0.12925	0.25811	0.27584	0.026228	0.20953	-0.088342	0.13705	-0.089598	0.10504	-0.21374	0.028532	0.25763	-0.1852	-0.15253	-0.16097	-0.08719	-0.15289	-0.24137	-0.24169	0.023091	-0.13304	-0.59533	-0.64777	-0.68362	-0.32084	0.33473	0.52649
	HNRNPM	-0.11847	0.011453	-0.04998	-0.3714	-0.37016	0.037074	-0.034821	-0.10037	-0.35175	-0.2269	-0.33256	-0.68487	-0.14175	-0.00093092	-0.0047202	-0.10827	0.12692	0.1675	0.098596	-0.13164	-0.034522	-0.029049	-0.025569	0.074152	0.13399	0.025382	0.21469	0.18457	0.43127	-0.003993	0.35735	0.22331	0.22712	0.13946	0.15555	0.18222	0.16699	0.15903	0.12442	0.19351	-0.35612	-0.35666	0.43262	-0.033354	0.43954	0.24957	-0.10847	-0.073067
	KRTAP9-4	-0.15991	-0.032615	-0.00036248	-0.36083	-0.35963	-0.01073	-0.081671	-0.14732	-0.39075	-0.29439	-0.45141	-0.72258	-0.18406	-0.029796	-0.030055	-0.093091	0.11142	0.15294	0.061779	-0.18076	-0.069764	-0.045537	-0.035052	0.061087	0.13005	0.012965	0.15453	0.20795	0.3656	0.003318	0.29953	0.2064	0.22108	0.13617	0.11571	0.16194	0.14563	0.14952	0.12554	0.19946	-0.34599	-0.34652	0.33299	-0.079955	0.4282	0.17473	-0.15383	-0.10435
	KRTAP10-9	-0.20052	-0.28053	-0.52188	-0.20744	-0.23613	0.25346	0.022614	0.13737	-0.14971	0.01941	-0.18802	-0.46356	-0.12331	-0.20789	-0.24121	-0.40387	-0.18685	-0.10471	-0.01131	-0.16414	-0.1468	-0.22245	-0.08745	0.0054255	-0.034036	-0.082243	-0.11997	-0.36278	0.48696	0.49739	0.1595	0.049485	0.061161	0.15574	0.10003	0.11718	0.22958	0.043499	-0.026184	-0.24	0.15422	-0.5022	0.069467	-0.030676	0.076285	-0.11962	-0.01375	0.28502
	PDIA3	-0.51056	-0.37084	-0.32935	-0.37267	-0.37143	0.029087	-0.14102	-0.23232	-0.4329	-0.25616	-0.48977	-0.79366	-0.22987	-0.42662	-0.29667	-0.38872	-0.1829	-0.06592	-0.029912	-0.24891	-0.23055	-0.24202	-0.136	-0.0069301	-0.11665	-0.14749	-0.11103	-0.14796	0.18927	0.32326	0.12999	-0.051669	0.2667	0.01311	-0.035551	0.066561	0.088826	-0.014241	-0.045038	-0.0055761	0.14183	-0.35788	-0.11482	-0.44909	-0.022569	-0.066728	-0.15799	0.11972
	DBI	0.38362	0.27635	-0.0071074	0.35451	0.34469	-0.06336	-0.15505	0.4373	0.15857	0.36275	0.36598	-0.033479	0.054768	0.12723	0.12237	-0.17179	0.086954	0.10483	0.3041	0.21064	0.1485	0.036405	0.11074	0.19034	0.22103	0.21753	0.40867	0.040316	0.49692	0.2139	0.39129	0.14642	-0.035994	0.28075	0.34193	0.19668	0.33243	0.11469	0.057496	-0.064065	-0.44152	-0.18765	0.31887	0.17621	0.55427	0.467	-0.24777	-0.16862
	A1BG	0.014441	0.13856	-0.1129	-0.36369	-0.36248	0.1724	0.56532	0.046687	0.26927	0.34699	0.45709	0.096981	0.4134	0.38763	0.43344	0.25761	0.43897	0.50974	0.28618	0.44407	0.41681	0.31802	0.26237	0.25648	0.37579	0.26463	0.63767	0.34933	0.36167	-0.045794	0.74599	0.38187	0.34384	0.31971	0.47937	0.42209	0.35729	0.36904	0.27694	0.26668	-0.34873	-0.34926	0.50971	0.10577	0.028232	0.22591	0.38677	0.025585
Keratinization	PPIA	0.033636	-0.081069	-0.14483	0.06691	0.050455	0.11957	0.00849	0.22023	0.27105	0.38653	-0.16735	-0.32199	0.019591	-0.041561	0.020312	-0.10082	-0.1865	-0.078174	0.082966	-0.05781	-0.00055241	-0.11365	-0.038011	-0.073498	-0.084354	-0.10971	-0.11674	-0.26907	0.44844	0.65604	0.43406	0.58516	0.34097	0.60398	0.50541	0.48723	0.70739	0.5293	0.57582	0.36554	0.10636	-0.13163	0.0032258	0.0536	0.19795	-0.026503	0.26355	0.44117
	unknown 6	0.073138	-0.063129	0.05729	0.18786	0.18315	-0.17835	-0.24104	0.031081	0.053064	0.1885	-0.31938	-0.47997	-0.13192	-0.1984	-0.096676	-0.21142	-0.31326	-0.24058	-0.08535	-0.22193	-0.17998	-0.27925	-0.26518	-0.30562	-0.26729	-0.31429	-0.14696	-0.24235	0.18562	0.48689	0.40614	0.41414	0.21533	0.53314	0.41057	0.41547	0.58906	0.44754	0.5953	0.52831	0.0081342	0.080802	-0.028053	0.020826	0.37754	0.10548	-0.078072	0.049731
	KRTAP4-6	-0.0025201	-0.064175	-0.03977	-0.037916	-0.040034	0.044327	0.072737	0.029864	0.20524	0.29865	-0.22762	-0.38399	0.063908	-0.059216	0.038191	-0.052403	-0.19479	-0.10063	-0.027296	-0.099059	-0.029939	-0.14442	-0.15848	-0.24554	-0.21025	-0.26431	-0.10116	-0.19833	0.28243	0.54803	0.53822	0.59312	0.41953	0.6231	0.53206	0.56351	0.69581	0.61138	0.731	0.6352	0.15174	0.034446	0.067663	0.04525	0.18709	0.02926	0.27123	0.3014
	KRT33A	0.082269	-0.0021072	0.21139	0.047196	0.047112	-0.08195	0.074833	-0.026772	0.22921	0.22197	-0.31764	-0.27203	0.086415	0.067597	0.13909	0.13492	-0.086417	-0.026737	-0.06932	-0.085816	0.011734	-0.066212	-0.12232	-0.25469	-0.1204	-0.21991	-0.068469	0.0011821	0.11758	0.41946	0.50931	0.60597	0.36907	0.6634	0.52667	0.57129	0.65979	0.65237	0.80256	0.73473	0.033188	0.13341	0.0024403	0.10791	0.25723	-0.029394	0.19688	0.089587
	HNRNPA1	-0.063358	0.052521	-0.18985	-0.33694	-0.32997	0.40725	0.54579	-0.05504	0.34136	0.40954	0.35812	0.080514	0.31433	0.12378	0.24216	0.19259	0.057017	0.1101	0.11011	0.21015	0.20544	0.14358	0.026911	-0.057447	-0.13404	-0.11362	0.10476	-0.19309	0.10701	0.035356	0.4372	0.45017	0.42878	0.21742	0.37738	0.37355	0.35679	0.42738	0.45227	0.51181	0.36846	0.17433	0.40051	0.1491	-0.30917	0.14837	0.76207	0.54268
	KRTAP13-2	-0.13697	0.05578	-0.07529	-0.39171	-0.36669	0.33803	0.30667	-0.089179	0.069529	0.11356	-0.17557	-0.39275	0.19957	0.0022463	0.082511	0.064754	-0.037502	0.013171	0.042073	-0.0428	0.069466	0.01707	-0.07761	-0.17054	-0.23373	-0.22302	-0.069236	-0.065924	0.28117	0.3263	0.39805	0.50119	0.61136	0.34992	0.36394	0.47589	0.42755	0.51675	0.5934	0.66021	0.39543	0.18058	0.29936	-0.029532	-0.010602	0.15853	0.50537	0.46934
	CALML3	-0.15862	-0.022073	-0.18315	-0.51147	-0.50351	0.40643	0.44162	-0.16051	0.028885	0.079378	-0.10655	-0.3526	0.16064	0.040119	0.087019	0.074829	-0.0029425	0.036328	-0.025952	-0.056765	0.042985	0.0076923	-0.11081	-0.18539	-0.19622	-0.24439	-0.038695	-0.15238	0.23587	0.14274	0.41343	0.45067	0.47227	0.26465	0.31976	0.40743	0.34564	0.45789	0.51465	0.5755	0.36442	0.06162	0.44856	0.12786	-0.071803	0.095469	0.5698	0.44089
	CALML5	-0.2775	-0.12646	-0.33127	-0.60568	-0.59913	0.40132	0.46582	-0.15544	0.044632	0.094081	-0.10071	-0.34233	0.18885	0.0074219	0.051087	0.022863	-0.01842	0.059896	-0.025342	-0.031805	0.054492	-0.0087815	-0.078065	-0.14018	-0.16788	-0.21204	-0.045577	-0.14451	0.30713	0.25567	0.42985	0.43602	0.50437	0.26775	0.30754	0.40089	0.35582	0.42468	0.44791	0.44781	0.34624	-0.12227	0.33155	-7.5031e-05	-0.19669	-0.034712	0.59908	0.52805
	KRTAP10-12	-0.51715	-0.29247	0.055436	-0.31218	-0.30669	0.031044	0.12503	-0.38261	-0.062613	0.048314	-0.34713	-0.53861	-0.057142	-0.21169	0.11589	0.14302	0.079779	0.23375	0.16902	0.031626	0.034617	0.089619	0.11281	0.18011	0.06385	0.023455	0.067237	0.042727	-0.15747	0.066111	0.33444	0.32983	0.54426	0.18859	0.22001	0.2829	0.32255	0.32621	0.31586	0.50265	0.16392	-0.030461	-0.15319	-0.44005	-0.26306	-0.056691	0.30534	0.26178
	KRTAP3-3	-0.2296	-0.26497	-0.18592	-0.26685	-0.27587	0.094841	0.080657	-0.13319	0.14749	0.14594	-0.3684	-0.33435	-0.064251	-0.13112	-0.067596	-0.0052348	-0.27725	-0.16839	-0.14838	-0.22836	-0.1297	-0.17972	-0.17235	-0.25338	-0.28037	-0.30847	-0.36333	-0.305	0.15228	0.39704	0.24504	0.56262	0.35246	0.39494	0.29242	0.34044	0.4941	0.45783	0.55723	0.45949	0.24449	-0.064867	-0.10021	-0.045933	-0.15796	-0.29499	0.48509	0.59086
	TXN	-0.24689	-0.1645	-0.23462	-0.40485	-0.39858	0.21938	0.18093	-0.11562	0.073151	0.11942	-0.30713	-0.45017	0.045524	-0.11029	-0.041807	-0.046427	-0.19794	-0.095035	-0.066001	-0.16724	-0.059588	-0.13063	-0.15026	-0.22178	-0.27539	-0.28941	-0.23124	-0.21906	0.30365	0.43588	0.36326	0.54806	0.50667	0.39087	0.33876	0.42227	0.49352	0.48742	0.56626	0.52251	0.29884	-0.057755	0.09576	-0.087566	-0.091432	-0.10009	0.49551	0.58345
	KRTAP9-2	-0.37444	-0.29765	-0.16727	-0.36267	-0.38017	0.189	0.19122	-0.22657	-0.026772	0.12203	-0.31158	-0.58847	-0.10255	-0.15096	0.052154	0.015786	-0.019699	0.12145	0.091078	-0.073297	-0.031652	-0.024776	0.0034442	0.062415	0.0080754	-0.079085	-0.010782	-0.19543	0.14234	0.18741	0.42776	0.46556	0.4297	0.30676	0.32367	0.34749	0.4597	0.40706	0.40043	0.43545	0.14284	-0.21308	0.10988	-0.12933	-0.094786	-0.068687	0.39527	0.40998
	KRTAP9-1	-0.23229	-0.26362	-0.29386	-0.33481	-0.35781	0.34917	0.30065	-0.10586	0.078178	0.16421	-0.22872	-0.38628	-0.025655	-0.099845	-0.022015	-0.031832	-0.15085	-0.061957	-0.062898	-0.14484	-0.07731	-0.10606	-0.11413	-0.13908	-0.16639	-0.23566	-0.21195	-0.40309	0.19246	0.30926	0.31298	0.44429	0.31743	0.3198	0.30069	0.34269	0.43981	0.41543	0.45046	0.37365	0.39417	-0.11339	0.16286	0.10676	-0.14551	-0.16526	0.51055	0.54023
	LY6G6D	0.049778	0.045195	-0.30302	-0.05864	-0.064311	0.29249	-0.27341	0.27214	-0.12786	-0.12502	-0.14999	-0.16066	-0.24441	-0.10827	-0.28933	-0.25508	-0.24947	-0.28147	0.014954	-0.2747	-0.1759	-0.14301	-0.046172	0.011563	-0.17484	-0.033187	-0.41517	-0.33425	0.4518	0.16303	-0.4679	0.02419	-0.095418	-0.2252	-0.25025	-0.2669	-0.14284	-0.21445	-0.26787	-0.39981	0.14372	-0.10655	0.095025	0.068741	0.081677	-0.016306	0.10277	0.57111
	KRTAP10-5KRTAP10-1	-0.2372	-0.4356	-0.49818	-0.062846	-0.093326	0.040155	-0.16097	-0.018795	0.099328	0.099117	-0.13304	0.01638	-0.26526	-0.33749	-0.36326	-0.2918	-0.52764	-0.44919	-0.28492	-0.31185	-0.32399	-0.36126	-0.24771	-0.25613	-0.39255	-0.32231	-0.61513	-0.66278	-0.010931	0.28496	-0.29864	0.064022	-0.16943	-0.063007	-0.15031	-0.17986	0.055148	-0.097543	-0.059108	-0.26947	0.3224	-0.18447	-0.39048	-0.058339	-0.44963	-0.52723	0.28773	0.63717
	ACOT7	0.037819	-0.13138	-0.43933	-0.11503	-0.148	0.30319	0.10816	0.27193	0.33323	0.29465	0.096079	0.1869	-0.031706	0.078816	-0.066327	-0.036647	-0.21262	-0.16429	-0.036269	-0.082761	-0.024773	-0.079241	0.0088471	-0.027893	-0.092246	-0.046132	-0.34564	-0.43085	0.41256	0.29468	-0.081805	0.38681	-0.035396	0.13509	0.10109	0.020647	0.24648	0.12759	0.091702	-0.21305	0.11536	-0.29314	0.020209	0.2372	-0.20966	-0.3415	0.54914	0.78472
	SACM1L	-0.19922	-0.28013	-0.51114	-0.31194	-0.34402	0.21048	-0.037768	0.081885	0.021491	0.11741	-0.17751	-0.34734	-0.22754	-0.13555	-0.18158	-0.22639	-0.25306	-0.1438	-0.019456	-0.22031	-0.15587	-0.19949	-0.07705	-0.010903	-0.10089	-0.10454	-0.27708	-0.42326	0.49718	0.29699	0.086344	0.3896	0.085229	0.13755	0.11251	0.057096	0.29766	0.12871	0.083385	-0.12307	-0.02525	-0.49495	0.091253	0.024393	-0.066601	-0.23647	0.37267	0.69488
	KRTAP10-8	-0.29303	-0.36537	-0.46747	-0.36717	-0.36595	-0.064635	-0.21163	-0.29963	-0.12186	-0.19538	-0.25989	-0.098338	-0.30043	-0.40537	-0.4867	-0.32624	-0.66116	-0.63118	-0.5318	-0.52232	-0.47109	-0.50162	-0.52356	-0.60497	-0.73217	-0.63762	-0.75785	-0.60024	-0.1272	0.030115	-0.36427	0.034061	-0.12799	-0.23795	-0.30378	-0.258	-0.15373	-0.14368	0.0082104	-0.023703	0.3206	0.02239	-0.21771	-0.084591	-0.47099	-0.44223	0.32402	0.59808
	ARF1ARF3ARF5ARF4	0.1531	-0.078416	-0.061035	0.25694	0.23248	0.22093	-0.015567	0.083485	0.20377	0.16958	-0.036583	0.16615	-0.13633	-0.12556	-0.15418	-0.042693	-0.37141	-0.41889	-0.21844	-0.23407	-0.2126	-0.18847	-0.22285	-0.31317	-0.38662	-0.32465	-0.53637	-0.63301	-0.19542	0.11925	-0.30938	0.095705	-0.17445	0.019964	-0.034076	-0.047784	0.081298	0.07963	0.18918	0.094017	0.58487	0.40951	-0.085996	0.35067	-0.16829	-0.1825	0.2924	0.40699
	KRTAP13-1	0.0013126	-0.0040617	-0.17747	-0.026723	-0.02112	0.45089	0.20497	0.084421	0.16837	0.12935	0.00052807	0.091589	0.11104	-0.10081	-0.12042	-0.038099	-0.26468	-0.30039	-0.11602	-0.12067	-0.07204	-0.079526	-0.13472	-0.25006	-0.40159	-0.28446	-0.45314	-0.4724	-0.016968	0.29843	-0.22604	0.08719	0.15942	0.011676	-0.0067675	0.077986	0.066688	0.1351	0.2069	0.15794	0.8256	0.42296	-0.0088439	0.14219	-0.30133	-0.087623	0.44387	0.56364
	KRT39	-0.32638	-0.40303	-0.65587	-0.39538	-0.40376	0.015105	-0.23907	-0.14403	-0.24563	-0.11946	-0.33345	-0.54809	-0.31705	-0.492	-0.53258	-0.59715	-0.64638	-0.5535	-0.37774	-0.51021	-0.46649	-0.57481	-0.511	-0.49808	-0.61522	-0.58027	-0.5506	-0.63931	0.30619	0.4024	0.0029847	0.10993	0.026798	0.015075	-0.061145	-0.018174	0.13929	-0.0080352	0.088199	-0.031197	0.22384	-0.30283	-0.036533	-0.14052	-0.13164	-0.23439	0.12088	0.5317
	KRTAP10-6	-0.28933	-0.44103	-0.64103	-0.3783	-0.40983	0.075457	-0.19613	-0.0982	-0.22295	-0.11861	-0.36713	-0.51295	-0.39783	-0.3829	-0.46589	-0.49439	-0.54072	-0.45261	-0.33135	-0.50169	-0.43914	-0.49957	-0.40578	-0.35596	-0.42416	-0.44312	-0.52679	-0.64194	0.34231	0.29308	-0.042866	0.16606	-0.091974	0.010305	-0.070495	-0.073025	0.13684	-0.021583	0.022137	-0.15849	0.096556	-0.45898	0.015157	0.007959	-0.087161	-0.33514	0.16299	0.55435
	KRTAP4-2	-0.40494	-0.47585	-0.36046	-0.24212	-0.25044	-0.42467	-0.36172	-0.24502	-0.061796	0.041141	-0.37637	-0.48515	-0.30164	-0.41272	-0.29924	-0.35521	-0.4684	-0.27761	-0.23286	-0.31389	-0.31762	-0.43344	-0.31	-0.27965	-0.31811	-0.34455	-0.28209	-0.25563	0.14031	0.36811	0.28034	0.32877	0.14215	0.26129	0.14594	0.12596	0.38037	0.15994	0.24723	0.14654	-0.28564	-0.46023	-0.38119	-0.41695	-0.12925	-0.34963	0.035447	0.31567
	KRTAP4-4	-0.41188	-0.46544	-0.41837	-0.37872	-0.38601	-0.34745	-0.24654	-0.26364	-0.066226	0.014066	-0.37165	-0.48669	-0.24687	-0.35188	-0.2813	-0.3296	-0.43937	-0.25617	-0.2675	-0.31992	-0.29687	-0.42278	-0.32809	-0.32127	-0.32878	-0.37615	-0.27488	-0.23655	0.20996	0.35954	0.33471	0.37638	0.17833	0.27935	0.17028	0.16846	0.38617	0.20489	0.29395	0.18248	-0.27063	-0.50552	-0.26922	-0.35429	-0.14037	-0.36584	0.12777	0.36009
	KRTAP9-9KRTAP9-8	-0.28254	-0.36412	-0.22914	-0.1207	-0.13068	-0.21724	-0.35157	-0.17868	-0.14891	-0.012982	-0.52132	-0.66882	-0.34305	-0.42797	-0.3162	-0.36633	-0.47659	-0.34331	-0.20728	-0.40592	-0.36073	-0.43029	-0.34784	-0.32208	-0.37596	-0.40259	-0.36722	-0.38115	0.15566	0.42737	0.21306	0.32691	0.18025	0.30078	0.1703	0.19335	0.41358	0.24152	0.35676	0.29644	0.0049848	-0.19625	-0.21397	-0.23736	0.081417	-0.17221	-0.010614	0.29433
	KRTAP2-4KRTAP2-3	-0.089638	-0.24953	-0.20838	-0.0066302	-0.017061	-0.1049	-0.25779	0.0043531	-0.049205	0.011686	-0.48616	-0.48906	-0.20582	-0.2936	-0.30421	-0.34548	-0.46897	-0.39275	-0.26227	-0.39573	-0.31441	-0.41507	-0.35308	-0.4035	-0.3879	-0.41858	-0.42947	-0.37866	0.25221	0.60752	0.16003	0.30173	0.1244	0.39884	0.20396	0.25806	0.43294	0.28991	0.42304	0.24762	0.14623	-0.11721	-0.19423	-0.049271	0.17789	-0.20803	-0.037718	0.25234
	NPC2	-0.22604	-0.15529	-0.46903	-0.62649	-0.6244	0.18982	-0.0051105	-0.13009	-0.11741	-0.12382	-0.25721	-0.38159	-0.17529	-0.11592	-0.23621	-0.18158	-0.3152	-0.2576	-0.2034	-0.35976	-0.21713	-0.25563	-0.26749	-0.29201	-0.37769	-0.34463	-0.39176	-0.30245	0.44763	0.089592	0.027464	0.41887	0.19219	0.00040578	-0.00094992	0.023278	0.12176	0.13079	0.17792	0.12233	0.0065358	-0.28329	0.2788	0.014123	-0.11112	-0.15694	0.50251	0.73596
	LMNB1	-0.49488	-0.35921	-0.55595	-0.75847	-0.75594	0.11824	0.11568	-0.29828	-0.10316	-0.052268	-0.24584	-0.46097	-0.10716	-0.21918	-0.19321	-0.18174	-0.26949	-0.1269	-0.16725	-0.24754	-0.17009	-0.23516	-0.21647	-0.21269	-0.31278	-0.31581	-0.26043	-0.25101	0.32297	0.15928	0.24278	0.40986	0.35131	0.067097	0.084779	0.12868	0.21779	0.18948	0.21232	0.19207	0.032084	-0.42736	0.10401	-0.24711	-0.34542	-0.26338	0.54596	0.70725
	KRTAP4-7	-0.6313	-0.45853	-0.362	-0.4608	-0.45926	-0.065985	-0.2538	-0.36456	-0.33181	-0.16432	-0.47262	-0.75967	-0.36504	-0.5071	-0.30112	-0.31354	-0.30377	-0.13286	-0.031363	-0.29805	-0.2851	-0.26875	-0.15433	-0.015698	-0.23264	-0.20018	-0.25337	-0.26416	0.088026	0.14468	0.058912	0.16031	0.31242	-0.067944	-0.066535	-0.025604	0.11896	-0.0009746	-0.010556	0.089875	0.048302	-0.32936	-0.20222	-0.55528	-0.25858	-0.15979	0.13863	0.47372
	KRTAP4-3	-0.47505	-0.4836	-0.46877	-0.49503	-0.51729	0.19763	-0.01398	-0.23348	-0.18863	-0.23332	-0.50819	-0.37389	-0.30117	-0.28595	-0.33213	-0.17521	-0.33515	-0.2534	-0.26328	-0.40827	-0.30758	-0.26522	-0.1838	-0.16088	-0.26642	-0.26809	-0.57936	-0.42636	0.095437	0.17215	-0.26148	0.14508	0.056759	-0.10664	-0.20336	-0.13288	-0.016764	-0.035736	-0.036995	-0.14588	0.30545	-0.34032	-0.21061	-0.15374	-0.40264	-0.55614	0.364	0.66421
	unknown 4	0.11789	-0.13797	-0.021363	0.25688	0.24802	-0.45478	-0.55478	-0.06384	0.032663	-0.037592	-0.17315	0.09685	-0.37623	-0.25654	-0.33373	-0.2263	-0.55907	-0.56389	-0.39855	-0.40919	-0.40079	-0.43005	-0.41333	-0.4778	-0.48621	-0.42144	-0.53969	-0.38113	-0.1997	-0.027631	-0.32207	0.050516	-0.37551	-0.057435	-0.17755	-0.25011	-0.033415	-0.12542	0.045464	-0.030864	-0.17199	0.12721	-0.33651	0.059985	-0.0066768	-0.26072	-0.10907	0.12083
	FABP4	0.14681	-0.087358	-0.30223	-0.18092	-0.21026	-0.056804	-0.16525	-0.022882	-0.033358	-0.17258	0.026567	0.2619	-0.31911	0.042145	-0.25052	-0.099024	-0.31537	-0.38191	-0.39038	-0.36261	-0.29378	-0.27281	-0.30114	-0.3375	-0.279	-0.27519	-0.43962	-0.36139	0.063836	-0.38933	-0.4084	0.03094	-0.54114	-0.31249	-0.32172	-0.42439	-0.2974	-0.27644	-0.2262	-0.36064	-0.2745	-0.21005	0.17734	0.42195	-0.083199	-0.3203	0.20068	0.31069
	APOD	0.12362	0.11738	-0.074861	-0.099165	-0.080493	-0.020123	-0.15271	-0.082422	-0.010818	-0.18461	0.12722	0.38025	-0.10559	-0.025709	-0.2069	-0.013281	-0.29127	-0.39585	-0.30613	-0.23816	-0.19417	-0.1571	-0.26281	-0.36322	-0.44991	-0.30311	-0.43755	-0.21155	-0.18873	-0.38517	-0.54484	-0.1245	-0.28343	-0.44076	-0.40144	-0.41114	-0.44156	-0.29957	-0.20231	-0.13439	0.11018	0.32837	0.048679	0.16353	-0.25771	-0.088959	0.21972	0.28793
	CRIP2	0.022395	-0.027881	0.1565	-0.04937	-0.044005	-0.043491	0.10692	-0.29225	0.13948	0.031532	-0.02668	0.17553	-0.020728	-0.025868	0.018752	0.19749	-0.19536	-0.23056	-0.28231	-0.15057	-0.12369	-0.090047	-0.25491	-0.39808	-0.38047	-0.37374	-0.29492	-0.22294	-0.44924	-0.27209	-0.059189	0.18094	-0.004009	-0.0068197	0.0056621	0.026857	0.011725	0.17286	0.34306	0.47713	0.27806	0.48112	0.013718	0.19745	-0.26086	-0.11174	0.36897	0.15707
	FLG2	0.14688	0.16005	0.38878	0.13025	0.13726	0.138	0.31458	-0.12965	0.32938	0.24283	0.13326	0.28761	0.19026	0.17946	0.30499	0.4456	0.10924	0.065924	0.018509	0.13927	0.15074	0.21074	0.040924	-0.095965	-0.082481	-0.07933	-0.015967	-0.030832	-0.42463	-0.22584	0.089589	0.27896	0.18286	0.14655	0.20602	0.21689	0.16487	0.34651	0.45233	0.6089	0.36391	0.62972	0.097795	0.25147	-0.17715	0.081977	0.44824	0.10385
	SOD1	0.0057984	-0.086825	-0.030081	-0.32037	-0.35471	0.18169	0.22771	-0.12401	0.11116	-0.0078719	-0.15195	0.018621	-0.14644	0.24787	0.13966	0.3211	0.074483	0.073996	-0.092375	-0.13639	-0.011378	0.073447	0.015397	-0.01745	0.082224	-0.021481	-0.16057	-0.10784	0.071508	-0.33321	0.012706	0.46762	-0.052937	0.057847	0.069344	0.0092105	0.10977	0.20908	0.21205	0.1587	-0.17321	-0.17892	0.30142	0.39819	-0.065419	-0.26951	0.54564	0.41187
	RTN3	0.081898	0.066806	-0.18645	-0.36318	-0.36196	0.095684	0.026768	-0.034842	0.13496	0.011367	0.0035794	0.096729	-0.079691	0.1393	-0.0377	0.097268	-0.19104	-0.20345	-0.18412	-0.21643	-0.08697	-0.098233	-0.17775	-0.27437	-0.28631	-0.24059	-0.31673	-0.17262	0.25348	-0.18477	-0.069187	0.45783	0.010243	-0.020857	0.0054309	-0.04217	0.053553	0.13266	0.20689	0.15984	-0.14903	-0.036187	0.30952	0.26774	-0.085862	-0.1203	0.56765	0.61136
	DSG3	-0.18126	-0.088865	-0.37659	-0.57919	-0.57726	0.14459	0.29245	-0.12576	0.24953	0.23313	0.20064	0.051175	0.10345	0.11189	0.098775	0.11904	-0.060099	0.037174	-0.025804	0.030312	0.077317	0.0053421	-0.038978	-0.095081	-0.14452	-0.12807	-0.038363	-0.10687	0.2926	-0.073313	0.31395	0.55173	0.27969	0.10692	0.21543	0.16092	0.25342	0.26938	0.27723	0.24593	-0.14539	-0.26897	0.28577	0.024261	-0.34433	-0.13183	0.765	0.70662
	PKP1	0.10298	0.041406	0.13671	-0.067005	-0.065156	-0.064753	0.053111	-0.16437	0.055666	0.13365	-0.17834	-0.36089	-0.027994	-0.025053	0.059581	0.016388	-0.16115	-0.13739	-0.14303	-0.16937	-0.10299	-0.16206	-0.29579	-0.38944	-0.28788	-0.3788	-0.035854	-0.15604	0.033826	0.081452	0.49797	0.48481	0.24194	0.43391	0.41722	0.43086	0.48008	0.51504	0.69326	0.77245	0.014674	0.2375	0.32567	0.2353	0.28724	0.20349	0.18953	0.025336
	SFN	-0.1407	-0.11121	-0.066968	-0.40239	-0.39661	-0.10645	0.0073976	-0.45888	-0.24464	-0.16013	-0.18452	-0.44268	-0.20724	-0.19806	-0.12367	-0.11063	-0.2482	-0.23307	-0.30264	-0.31601	-0.27459	-0.28001	-0.44453	-0.4752	-0.436	-0.51016	-0.11951	-0.23922	-0.14574	-0.32587	0.28017	0.21756	0.078261	0.0023756	0.075312	0.097269	0.078844	0.18073	0.34484	0.56908	-0.028909	0.13588	0.40483	0.12451	0.040325	0.14776	0.18702	0.032357
	HSPA2	-0.15066	-0.10593	-0.21167	-0.46923	-0.46204	0.14731	0.15819	-0.34173	-0.2232	-0.13807	-0.20467	-0.47737	-0.091912	-0.1924	-0.16618	-0.17623	-0.27318	-0.26814	-0.29909	-0.32171	-0.24906	-0.28269	-0.43965	-0.49995	-0.48795	-0.54414	-0.20625	-0.3415	0.024766	-0.060644	0.2713	0.21581	0.18658	0.068782	0.11335	0.19359	0.13531	0.24339	0.39282	0.53592	0.27925	0.14171	0.44561	0.16264	0.0094543	0.12346	0.28007	0.19478
	PCBP1	-0.15159	-0.036645	0.044012	-0.052967	-0.048859	-0.048471	-0.15702	-0.24345	-0.010325	0.17946	0.08001	-0.29299	-0.23709	-0.24406	0.026739	-0.0020419	-0.13061	-0.054974	0.14367	-0.03245	-0.089598	-0.035796	-0.069683	0.021627	-0.18628	-0.10987	0.01363	-0.26159	-0.17552	-0.33157	0.12862	0.25881	0.18452	-0.094415	0.084463	-0.0071937	0.13287	0.094912	0.13419	0.39767	-0.012905	0.24535	0.18102	-0.12024	-0.1118	0.30753	0.29645	0.32023
	PHB2	-0.11906	-0.042316	-0.13039	-0.48673	-0.48154	-0.024339	-0.20832	-0.36518	-0.4348	-0.44571	-0.29767	-0.40805	-0.4065	-0.16106	-0.26217	-0.13423	-0.24247	-0.28675	-0.28794	-0.46184	-0.34813	-0.2604	-0.3704	-0.33795	-0.37691	-0.37344	-0.30726	-0.20094	0.010476	-0.54317	-0.21953	0.069032	-0.13371	-0.37079	-0.29949	-0.2955	-0.30183	-0.16821	-0.083989	0.1167	-0.17542	0.0023453	0.43163	0.13636	0.065708	0.074696	0.13841	0.21063
	AHNAK	0.20895	0.11155	-0.039201	0.087472	0.093179	0.09377	-0.034966	-0.1294	-0.32582	-0.1523	0.053961	-0.29143	-0.11458	-0.27164	-0.26652	-0.39398	-0.32332	-0.44044	-0.30585	-0.28597	-0.31957	-0.35084	-0.53047	-0.56072	-0.53809	-0.55658	-0.11607	-0.47292	-0.18695	-0.13048	0.05031	-0.31521	-0.20221	-0.12113	-0.050749	0.0022856	-0.12976	-0.055903	0.11255	0.29437	0.43836	0.50443	0.49235	0.37667	0.29979	0.46814	-0.28129	-0.36553
	DLD	0.33587	0.2573	0.13762	0.22678	0.23377	0.23453	0.093357	-0.0031799	-0.18168	-0.039811	0.12178	-0.1631	0.01942	-0.11246	-0.096438	-0.20542	-0.15569	-0.29977	-0.15702	-0.14106	-0.16012	-0.16506	-0.36072	-0.41595	-0.38829	-0.39932	-0.025339	-0.37184	-0.18459	-0.095243	0.06126	-0.24037	-0.11202	-0.029109	0.047238	0.10361	-0.055175	0.057959	0.20263	0.37972	0.54783	0.66388	0.52995	0.47029	0.35161	0.54793	-0.20033	-0.36017
	KRT16	-0.023903	0.04028	0.40106	0.030887	0.056249	-0.24292	-0.077981	-0.35784	-0.032105	-0.056317	-0.25464	-0.20482	-0.045218	-0.11306	0.052368	0.15295	-0.11505	-0.11944	-0.15832	-0.14103	-0.10735	-0.077847	-0.2311	-0.33079	-0.30137	-0.3205	-0.096648	0.041233	-0.42026	-0.15697	0.16359	0.20642	0.21665	0.15514	0.13567	0.2011	0.15275	0.29051	0.48069	0.73115	0.1139	0.52845	-0.025174	-0.047672	0.043947	0.13308	0.051458	-0.15287
	KRT5	-0.052282	0.023617	0.32205	0.030629	0.063812	-0.38896	-0.37664	-0.34237	-0.26288	-0.22851	-0.42575	-0.47769	-0.20908	-0.28463	-0.154	-0.11383	-0.26983	-0.26818	-0.21241	-0.31343	-0.26549	-0.25976	-0.36369	-0.41201	-0.41175	-0.40705	-0.167	0.024669	-0.26117	-0.053058	0.10216	0.098368	0.16461	0.097056	0.035979	0.11357	0.091625	0.15884	0.36104	0.60886	-0.033321	0.4099	-0.0534	-0.18516	0.24704	0.21439	-0.24005	-0.24291
	CS	0.13319	0.097117	-0.46757	-0.37179	-0.36741	0.41664	0.20328	0.075082	-0.040149	0.0086997	0.13587	-0.11645	0.044554	-0.039342	-0.22639	-0.29057	-0.33647	-0.39592	-0.26051	-0.26387	-0.1791	-0.27495	-0.39793	-0.49344	-0.53165	-0.4853	-0.30415	-0.50368	0.40139	0.12247	0.058861	0.15697	0.023893	-0.012927	0.048112	0.082659	0.049701	0.10709	0.20337	0.14404	0.38538	0.095023	0.60074	0.41017	0.040701	0.16494	0.38693	0.47205
	YWHAB1	0.010561	-0.016892	-0.65774	-0.45816	-0.45663	0.31841	0.16143	0.072753	-0.20263	-0.064907	0.15219	-0.27061	0.034698	-0.13419	-0.3174	-0.50906	-0.31978	-0.33954	-0.25127	-0.23659	-0.2031	-0.35247	-0.40884	-0.43074	-0.43906	-0.43655	-0.13515	-0.43316	0.53413	0.22983	0.19582	-0.03356	-0.020769	-0.031591	0.027771	0.065453	0.012138	-0.021408	0.019244	-0.081805	0.20856	-0.23752	0.5732	0.24635	0.10126	0.17244	0.11764	0.25631
	CAPG	0.052893	0.02417	-0.64586	-0.45487	-0.45335	0.39472	0.23219	0.14526	-0.125	-0.033978	0.16345	-0.18015	0.10545	-0.045925	-0.26984	-0.43562	-0.27157	-0.30165	-0.22649	-0.19896	-0.14152	-0.29107	-0.3459	-0.39497	-0.39219	-0.38436	-0.15156	-0.39339	0.59233	0.29072	0.17018	0.017651	0.0092979	0.01059	0.05123	0.09765	0.036425	0.02092	0.04921	-0.099549	0.25114	-0.23532	0.56495	0.28988	0.086598	0.12392	0.19469	0.32786
	LMNB2	0.57276	0.31358	-0.05395	0.24502	0.21473	0.33095	0.18489	0.3541	0.064519	0.20634	0.32596	0.016138	0.042664	0.20574	0.04894	-0.14644	-0.0092463	-0.13046	-0.014248	-0.020727	-0.008978	-0.068937	-0.17298	-0.19559	-0.051406	-0.13589	0.1407	-0.35066	0.33321	0.0048344	0.24777	0.058594	-0.26311	0.18821	0.25827	0.17702	0.18195	0.15873	0.19765	0.092298	0.080759	0.1431	0.76344	0.79544	0.58227	0.45885	-0.05977	-0.1789
	PPL	0.4716	0.4254	0.0026225	0.026063	0.032316	0.43219	0.29089	0.19303	-0.065043	0.06016	0.28912	-0.099491	0.1772	0.15492	0.038869	-0.12724	0.0054139	-0.14374	-0.036926	-0.030564	0.011293	-0.040931	-0.24413	-0.31557	-0.23821	-0.2667	0.13754	-0.24232	0.25785	-0.044658	0.25285	0.0023879	-0.013474	0.091341	0.20892	0.23248	0.071093	0.1888	0.27503	0.3483	0.34167	0.42538	0.88175	0.65435	0.49758	0.64189	0.021575	-0.16641
	MUC16	0.26463	0.053333	0.17208	0.36121	0.3625	-0.28017	-0.45659	-0.057962	-0.42054	-0.30917	-0.3673	-0.46307	-0.31026	-0.32989	-0.37736	-0.46897	-0.41204	-0.51413	-0.37487	-0.4612	-0.44303	-0.47497	-0.55413	-0.57537	-0.45909	-0.51795	-0.2374	-0.29676	-0.13874	0.11054	-0.04287	-0.30218	-0.30839	0.056285	-0.06987	-0.0073926	-0.040673	-0.061095	0.14019	0.20761	0.10761	0.35451	0.107	0.23198	0.61854	0.29048	-0.72102	-0.6271
	KRTAP1-1	0.14217	-0.0017237	0.1411	0.39352	0.39993	-0.52251	-0.63741	0.05052	-0.27294	-0.16535	-0.31133	-0.38393	-0.28647	-0.29734	-0.29518	-0.42622	-0.31401	-0.31276	-0.15616	-0.27942	-0.29728	-0.36741	-0.3006	-0.25981	-0.1973	-0.21206	-0.073915	-0.015399	0.046106	0.25958	0.031218	-0.17363	-0.194	0.13577	-0.010406	-0.014499	0.075813	-0.089127	0.018468	-0.0040312	-0.32952	-0.008823	-0.22087	-0.14398	0.5413	0.16394	-0.74879	-0.51342
	KRT36	-0.15178	-0.32107	0.2215	0.27845	0.2682	-0.81147	-0.79433	-0.48445	-0.46157	-0.42038	-0.40308	-0.27351	-0.67546	-0.52021	-0.40268	-0.30253	-0.43386	-0.42998	-0.4018	-0.46555	-0.55185	-0.46075	-0.44143	-0.33969	-0.3252	-0.35184	-0.29445	-0.18399	-0.70235	-0.5198	-0.37282	-0.40765	-0.55322	-0.3816	-0.44698	-0.5073	-0.38371	-0.45008	-0.30616	-0.091356	-0.4274	0.09851	-0.44819	-0.22883	0.060518	-0.13613	-0.67324	-0.56043
	KRT9	0.20775	0.21647	0.57776	0.40607	0.43244	-0.21199	-0.39415	-0.11305	-0.2795	-0.33986	-0.42256	-0.21659	-0.18942	-0.14861	-0.12223	0.001264	-0.12281	-0.24675	-0.14092	-0.26889	-0.20607	-0.10265	-0.20402	-0.25459	-0.24223	-0.20697	-0.22336	0.068707	-0.40114	-0.11623	-0.32951	-0.21954	-0.079796	-0.079923	-0.18341	-0.084606	-0.18828	-0.050583	0.10415	0.32013	0.20912	0.6849	-0.11799	0.028876	0.37613	0.24811	-0.47758	-0.46673
	KRT1	0.089731	0.10964	0.58451	0.21021	0.22701	-0.41213	-0.34796	-0.35099	-0.21394	-0.25098	-0.32393	-0.21005	-0.27104	-0.10267	0.015766	0.15537	-0.051243	-0.1079	-0.13328	-0.21002	-0.17965	-0.065157	-0.19444	-0.21406	-0.16046	-0.18856	-0.056645	0.14263	-0.51965	-0.47393	-0.086866	0.011043	-0.071686	-0.0711	-0.084618	-0.074722	-0.10403	0.031948	0.18946	0.49521	-0.1923	0.50796	-0.015558	0.012239	0.25446	0.20696	-0.26198	-0.4264
	KRT2	0.28889	0.25956	0.63262	0.3985	0.41554	-0.42609	-0.44745	-0.1459	-0.24084	-0.2693	-0.25599	-0.15228	-0.24814	-0.030681	0.0018579	0.077307	-0.0061966	-0.10888	-0.079178	-0.17876	-0.14949	-0.053777	-0.15831	-0.16369	-0.073099	-0.094117	0.027459	0.22008	-0.37004	-0.39884	-0.13869	-0.11499	-0.19594	-0.070215	-0.10588	-0.11228	-0.15613	-0.05741	0.075159	0.31721	-0.30005	0.48529	0.04207	0.10369	0.50394	0.33743	-0.51151	-0.62014
	KRT6C	0.01039	0.0089684	0.4151	0.1125	0.10884	-0.36752	-0.17811	-0.3204	-0.17104	-0.30921	-0.023217	0.26925	-0.22564	0.071451	0.087226	0.29202	0.18674	0.11353	-0.082106	-0.0068758	-0.04583	0.12321	0.058341	0.10313	0.18008	0.13971	0.082648	0.28394	-0.62785	-0.81493	-0.36978	-0.30599	-0.39847	-0.44001	-0.38658	-0.44347	-0.51114	-0.36378	-0.365	-0.13853	-0.39783	0.15057	-0.12435	0.01748	-0.09213	-0.081437	-0.23237	-0.47058
	LGALS3	0.24384	0.070664	-0.32542	0.1279	0.12434	-0.089105	-0.42414	0.12486	-0.44286	-0.36732	0.12384	-0.014345	-0.30426	-0.26671	-0.51725	-0.62163	-0.40462	-0.54228	-0.34154	-0.36715	-0.40848	-0.44224	-0.44803	-0.38855	-0.40346	-0.33629	-0.25091	-0.39184	0.087554	-0.17168	-0.47551	-0.65669	-0.65647	-0.51353	-0.49782	-0.5257	-0.56836	-0.62531	-0.58589	-0.61707	-0.031582	-0.01293	0.22892	0.247	0.27757	0.19604	-0.5928	-0.32198
	GPRC5D	0.14005	-0.081742	-0.054203	0.33322	0.32665	-0.45273	-0.55229	0.0087365	-0.26246	-0.35189	0.00021477	0.30028	-0.32284	-0.22588	-0.41406	-0.35289	-0.33862	-0.43539	-0.37162	-0.28402	-0.35495	-0.34242	-0.28998	-0.26531	-0.23098	-0.17521	-0.30717	-0.14213	-0.30981	-0.23806	-0.63968	-0.66105	-0.73173	-0.48891	-0.57699	-0.6201	-0.60438	-0.66261	-0.61833	-0.6775	-0.23071	-0.02209	-0.37283	0.0019234	0.016702	-0.20874	-0.64879	-0.44486
Keratinization	HSPB1	-0.40513	-0.44894	-0.27306	-0.45116	-0.44965	-0.44965	-0.1608	-0.64888	-0.54894	-0.44012	-0.3653	-0.57532	-0.31101	-0.47861	-0.40839	-0.45615	-0.40651	-0.35493	-0.56951	-0.44922	-0.48828	-0.55105	-0.64006	-0.62597	-0.49709	-0.64873	-0.14234	-0.21386	-0.32853	-0.19155	0.25045	-0.25517	-0.15492	-0.10904	-0.14109	-0.056794	-0.13511	-0.11559	0.053302	0.2247	-0.13127	-0.20452	0.014092	-0.18076	-0.051151	-0.13017	-0.3478	-0.44182
	KRT83	-0.26822	-0.36597	-0.39143	-0.36777	-0.36655	-0.36654	-0.091584	-0.52896	-0.40705	-0.27888	-0.047105	-0.31391	-0.21771	-0.45311	-0.41649	-0.51292	-0.47741	-0.45337	-0.58525	-0.37471	-0.46378	-0.57027	-0.68363	-0.6987	-0.60457	-0.70212	-0.14765	-0.37599	-0.32037	-0.20748	0.21653	-0.32271	-0.25937	-0.17586	-0.14683	-0.10432	-0.17889	-0.17724	-0.0013433	0.13609	-0.019229	-0.10008	0.10906	-0.041629	-0.13852	-0.052554	-0.25331	-0.36017
	LGALS7	-0.27814	-0.36132	-0.42194	-0.3631	-0.36189	-0.36188	-0.14963	-0.52223	-0.46249	-0.28016	-0.038531	-0.4095	-0.26864	-0.50941	-0.44903	-0.58422	-0.50072	-0.4698	-0.54934	-0.39039	-0.4909	-0.59683	-0.69826	-0.67865	-0.61803	-0.70393	-0.12436	-0.41976	-0.27724	-0.21731	0.22983	-0.34063	-0.25668	-0.20572	-0.15211	-0.12235	-0.1799	-0.20649	-0.03974	0.12184	-0.037839	-0.11312	0.16352	-0.063809	-0.087936	0.035133	-0.29538	-0.35559
	TUBA1B	-0.29863	-0.36681	-0.40363	-0.36862	-0.36739	-0.36738	-0.11165	-0.53017	-0.42831	-0.24378	-0.012662	-0.39027	-0.23622	-0.4857	-0.40083	-0.54054	-0.45242	-0.40896	-0.5105	-0.33745	-0.44717	-0.55358	-0.65119	-0.62838	-0.56465	-0.65771	-0.068676	-0.37383	-0.28971	-0.22084	0.27916	-0.31532	-0.21911	-0.17908	-0.11672	-0.091354	-0.14951	-0.17809	-0.023034	0.14359	-0.06143	-0.13231	0.14764	-0.092499	-0.11479	0.030873	-0.26908	-0.36099
	HIST1H1B	0.043203	-0.088583	-0.47497	-0.35196	-0.35079	-0.07114	-0.14175	-0.20833	-0.44475	-0.33209	-0.034161	-0.34978	-0.23969	-0.30974	-0.49153	-0.60943	-0.52242	-0.58939	-0.55557	-0.50136	-0.48337	-0.59285	-0.72142	-0.75267	-0.6758	-0.71865	-0.2802	-0.49357	0.13441	-0.11529	0.048452	-0.23894	-0.3324	-0.20169	-0.17701	-0.14396	-0.21038	-0.19334	-0.02887	0.0061667	0.02665	-0.06158	0.50089	0.29885	0.20748	0.15677	-0.21292	-0.14509
	ANXA2ANXA2P2	-0.21888	-0.21328	-0.25513	-0.50837	-0.49446	-0.36401	-0.31457	-0.46284	-0.44071	-0.39176	-0.39468	-0.58383	-0.35916	-0.34215	-0.39333	-0.38799	-0.47047	-0.43723	-0.49092	-0.54245	-0.46657	-0.52801	-0.6222	-0.64316	-0.58697	-0.64253	-0.29787	-0.20416	0.046893	-0.17331	0.15365	0.11489	-0.044589	-0.064837	-0.093279	-0.051762	-0.03197	-0.003675	0.18204	0.31235	-0.3008	-0.15812	0.22187	-0.066537	0.127	-0.013025	-0.078723	-0.001505
	TUBB2ATUBB2B	-0.19556	-0.26409	-0.47068	-0.36162	-0.35622	-0.29228	-0.35669	-0.29477	-0.33397	-0.16383	-0.20728	-0.57048	-0.34836	-0.47744	-0.48222	-0.60501	-0.62907	-0.56007	-0.44016	-0.50357	-0.49721	-0.62819	-0.65876	-0.65108	-0.68172	-0.6852	-0.328	-0.48033	0.16834	0.083979	0.20977	0.083943	-0.058712	-0.005013	-0.012905	-0.012404	0.098954	-0.011818	0.15955	0.1988	-0.14	-0.1888	0.17658	-0.082777	0.087074	0.044031	-0.077689	0.14537
	ATG9B	-0.18038	-0.45671	-0.2657	-0.04925	-0.082625	-0.45742	-0.55801	-0.38738	-0.65153	-0.47088	-0.54169	-0.72773	-0.67408	-0.59094	-0.60314	-0.67817	-0.59183	-0.5783	-0.56347	-0.67698	-0.69897	-0.71379	-0.6944	-0.58653	-0.4801	-0.62315	-0.36392	-0.53382	-0.18415	-0.10744	-0.048298	-0.3316	-0.50801	-0.14891	-0.25599	-0.2557	-0.14659	-0.27787	-0.12898	-0.094857	-0.20406	-0.26159	-0.01369	0.048663	0.30965	-0.11085	-0.65551	-0.44946
	KRTAP10-10	-0.28814	-0.54131	-0.39964	-0.11572	-0.15039	-0.2961	-0.46965	-0.31075	-0.60166	-0.44422	-0.62162	-0.74294	-0.60391	-0.61065	-0.6384	-0.69924	-0.60975	-0.57062	-0.53732	-0.66957	-0.66882	-0.69685	-0.62504	-0.52835	-0.46744	-0.58791	-0.47316	-0.58542	-0.067981	0.15576	-0.10054	-0.30585	-0.39032	-0.091352	-0.24786	-0.20205	-0.086619	-0.2401	-0.1262	-0.18714	0.015376	-0.34756	-0.15505	-0.046287	0.17537	-0.26914	-0.54701	-0.23496
	RPS13	-0.024118	-0.37204	-0.42719	0.046777	0.012185	-0.37263	-0.45457	-0.25772	-0.46485	-0.25002	-0.11504	-0.39087	-0.54912	-0.56645	-0.60599	-0.75269	-0.67989	-0.69333	-0.58837	-0.56763	-0.66551	-0.74219	-0.75535	-0.6825	-0.61395	-0.69673	-0.34565	-0.74042	-0.19667	-0.13931	-0.054329	-0.42061	-0.64106	-0.22693	-0.24908	-0.30616	-0.19198	-0.35124	-0.19244	-0.19608	-0.07695	-0.14532	0.10274	0.21451	0.17737	-0.017034	-0.53399	-0.36614
	SLC9C1	-0.27055	-0.34515	-0.39507	-0.34685	-0.34569	-0.34569	-0.42171	-0.49886	-0.72717	-0.51877	-0.36999	-0.76349	-0.50942	-0.63719	-0.63039	-0.74496	-0.61555	-0.61159	-0.57752	-0.63861	-0.66475	-0.72063	-0.78972	-0.71652	-0.69735	-0.76593	-0.30649	-0.49512	-0.13376	-0.17452	0.034327	-0.37523	-0.29822	-0.28118	-0.28381	-0.22568	-0.25228	-0.2923	-0.11668	0.060557	-0.04303	-0.11329	0.21204	-0.069245	0.17271	0.1108	-0.49539	-0.33967
	ALDH2	-0.18207	-0.40242	-0.27251	-0.24521	-0.25742	-0.40305	-0.49168	-0.47567	-0.72712	-0.68879	-0.68419	-0.67305	-0.59395	-0.55805	-0.69749	-0.65723	-0.68016	-0.72591	-0.78216	-0.82747	-0.76504	-0.7831	-0.84878	-0.85041	-0.71155	-0.83161	-0.5874	-0.48836	-0.21081	-0.096794	-0.20731	-0.36741	-0.47389	-0.21828	-0.38309	-0.2826	-0.29703	-0.28533	-0.062062	-0.011501	-0.016271	-0.10635	0.0004861	0.083454	0.23597	-0.21495	-0.57759	-0.39604
	LMNA	-0.10211	-0.096736	-0.43636	-0.44319	-0.43789	0.2866	0.021082	-0.1432	-0.22756	-0.15875	-0.19903	-0.42555	-0.16203	-0.26337	-0.35718	-0.3609	-0.46148	-0.47722	-0.33726	-0.44421	-0.34362	-0.39298	-0.48736	-0.54294	-0.63056	-0.59098	-0.46659	-0.56031	0.2458	0.11792	-0.017801	0.15036	0.084689	-0.055336	-0.042197	0.032576	0.035873	0.085312	0.21257	0.23262	0.42355	0.091401	0.39618	0.18624	-0.02392	0.050499	0.31063	0.49306
	HSP90AA1	-0.32303	-0.29217	-0.57415	-0.65819	-0.656	0.039687	-0.16351	-0.30013	-0.41409	-0.32715	-0.38704	-0.65335	-0.33819	-0.37886	-0.47321	-0.48608	-0.51474	-0.46303	-0.40414	-0.55773	-0.45355	-0.51343	-0.54001	-0.52703	-0.59286	-0.59561	-0.45415	-0.45941	0.32553	0.068896	0.033847	0.15176	0.050477	-0.10637	-0.12173	-0.061293	-0.0030915	-0.019582	0.083975	0.096236	0.045617	-0.2968	0.28313	-0.045952	-0.028898	-0.10066	0.17776	0.45285
	HEPHL1	-0.39109	-0.46431	-0.56093	-0.61431	-0.63114	-0.011393	0.027367	-0.56461	-0.39976	-0.30329	-0.17116	-0.39652	-0.36536	-0.4506	-0.44833	-0.41522	-0.52508	-0.49692	-0.57246	-0.51039	-0.52035	-0.53609	-0.64415	-0.63605	-0.65479	-0.71822	-0.42803	-0.65731	-0.2346	-0.32924	-0.012727	-0.11443	-0.2154	-0.31288	-0.24468	-0.21231	-0.21054	-0.16025	-0.024027	0.10037	0.22303	-0.12375	0.25296	0.09599	-0.3529	-0.20904	0.21058	0.21551
	MDH2	-0.068539	-0.13413	-0.37311	-0.43258	-0.43114	-0.11443	-0.20185	-0.2848	-0.18979	-0.19001	-0.097293	-0.19842	-0.32136	-0.23301	-0.35659	-0.29198	-0.51671	-0.52126	-0.45697	-0.48245	-0.41476	-0.45543	-0.55638	-0.60762	-0.63982	-0.60755	-0.45636	-0.4597	0.063868	-0.27292	-0.089147	0.17314	-0.17605	-0.20224	-0.16421	-0.19306	-0.10564	-0.069899	0.088203	0.14291	-0.10275	-0.029379	0.3043	0.17666	-0.088747	-0.07057	0.27621	0.3944
	VDAC1	0.039427	-0.077936	-0.29193	-0.32497	-0.33489	-0.057562	-0.20401	-0.2266	-0.27066	-0.1881	-0.15222	-0.38896	-0.37449	-0.21845	-0.32651	-0.33395	-0.45819	-0.4816	-0.3971	-0.49789	-0.42431	-0.45374	-0.56236	-0.57513	-0.55709	-0.58411	-0.34646	-0.49289	0.13682	-0.25663	0.036924	0.18139	-0.20018	-0.10262	-0.061304	-0.10034	-0.0096846	0.0042465	0.15869	0.22205	-0.12078	-0.016081	0.4939	0.33097	0.1874	0.1066	0.12779	0.21754
	ACTBL2	-0.27051	-0.35411	-0.054019	-0.35586	-0.35467	-0.35467	-0.43266	-0.51182	-0.54645	-0.68981	-0.87669	-0.55164	-0.52266	-0.37335	-0.51265	-0.26899	-0.52183	-0.54622	-0.66509	-0.76816	-0.6056	-0.54762	-0.60879	-0.66891	-0.57405	-0.6476	-0.69862	-0.22265	-0.23077	-0.12464	-0.34636	-0.04404	-0.21372	-0.15915	-0.37009	-0.23956	-0.23555	-0.12246	0.082607	0.1459	-0.034135	-0.031315	-0.19886	-0.058984	0.046413	-0.42861	-0.21497	-0.04167
	KRT85	-0.52276	-0.64634	-0.30558	-0.40675	-0.43647	-0.23238	-0.2026	-0.63641	-0.31955	-0.29169	-0.55068	-0.48445	-0.55087	-0.51674	-0.40933	-0.24132	-0.53839	-0.44505	-0.52682	-0.57488	-0.55729	-0.49991	-0.51382	-0.48738	-0.51658	-0.59701	-0.59189	-0.58668	-0.43531	-0.23284	-0.13026	0.069456	-0.15963	-0.16436	-0.22356	-0.19986	-0.050574	-0.055307	0.086975	0.17777	0.12915	-0.13831	-0.23307	-0.11571	-0.40966	-0.51241	0.18537	0.28529
	KRT35	-0.66529	-0.68205	-0.29699	-0.49246	-0.5001	-0.46435	-0.3558	-0.79331	-0.56526	-0.46038	-0.65951	-0.76581	-0.57369	-0.69275	-0.51297	-0.43287	-0.57649	-0.45504	-0.56462	-0.61677	-0.63054	-0.61277	-0.62758	-0.56467	-0.5889	-0.68208	-0.45893	-0.42405	-0.46065	-0.19482	0.020093	-0.09516	-0.070912	-0.18374	-0.24679	-0.17156	-0.097896	-0.12028	0.048692	0.25006	-0.0083924	-0.19379	-0.2814	-0.39775	-0.30168	-0.3673	-0.13521	-0.023435
	KRT86	-0.54902	-0.65219	-0.31163	-0.49321	-0.50789	-0.47012	-0.37526	-0.74275	-0.59879	-0.53844	-0.73243	-0.75999	-0.6085	-0.62828	-0.56195	-0.46594	-0.62013	-0.53517	-0.67878	-0.72224	-0.69053	-0.68431	-0.71705	-0.68581	-0.62614	-0.75773	-0.53458	-0.44713	-0.36848	-0.17793	-0.0071297	-0.080266	-0.19084	-0.14432	-0.25736	-0.17882	-0.10674	-0.11411	0.082063	0.21315	-0.078743	-0.24711	-0.19396	-0.22302	-0.15452	-0.41402	-0.1967	-0.082987
	ENO1	-0.43392	-0.4561	-0.32831	-0.45835	-0.45682	-0.45682	-0.18309	-0.65923	-0.22758	-0.1484	-0.094555	-0.26164	-0.33386	-0.46324	-0.31947	-0.28538	-0.4968	-0.3949	-0.48758	-0.35974	-0.43272	-0.48107	-0.56207	-0.56442	-0.58993	-0.62263	-0.2653	-0.37374	-0.42222	-0.3811	0.14593	0.018025	-0.10897	-0.19971	-0.1339	-0.15623	-0.081476	-0.088591	0.080779	0.27648	-0.16496	-0.096084	-0.070515	-0.22169	-0.42124	-0.21529	0.14626	0.089586
	ACTBACTG1	-0.19212	-0.23804	-0.29047	-0.43465	-0.42371	-0.36785	-0.32813	-0.50963	-0.34896	-0.36308	-0.20084	-0.24415	-0.39928	-0.37967	-0.447	-0.349	-0.58341	-0.5865	-0.59844	-0.55636	-0.52691	-0.55421	-0.67745	-0.7259	-0.73393	-0.71882	-0.47323	-0.38883	-0.23085	-0.41236	-0.14453	-0.034158	-0.25769	-0.32215	-0.30321	-0.29889	-0.26772	-0.20076	0.0048939	0.16477	-0.15704	0.031241	0.11929	0.0046094	-0.16573	-0.12715	0.053905	0.11677
	DSP	-0.12306	-0.2436	-0.15731	-0.20543	-0.21156	-0.32498	-0.29464	-0.44389	-0.26151	-0.13728	-0.22633	-0.45008	-0.41637	-0.40466	-0.32732	-0.33344	-0.53227	-0.49856	-0.4466	-0.48108	-0.48252	-0.51597	-0.62271	-0.63379	-0.62274	-0.66887	-0.32546	-0.49168	-0.22357	-0.25586	0.14825	0.13452	-0.14282	-0.034573	-0.012365	-0.040042	0.070979	0.055495	0.26745	0.42775	-0.089607	0.10835	0.18838	0.094998	0.043037	0.041557	0.015598	0.029768
	TRIM29	0.019202	-0.10657	-0.0043208	-0.070893	-0.07071	-0.31707	-0.51568	-0.3086	-0.41698	-0.34862	-0.49932	-0.59505	-0.51871	-0.38481	-0.42097	-0.38103	-0.55047	-0.57893	-0.45228	-0.63716	-0.55072	-0.544	-0.63088	-0.64179	-0.61771	-0.6431	-0.4608	-0.4072	-0.079421	-0.15403	-0.079669	0.080437	-0.19609	-0.04957	-0.1215	-0.10675	-0.011141	-0.005265	0.21533	0.34352	-0.10537	0.18113	0.17686	0.1413	0.35042	0.099026	-0.22857	-0.058787
	KRT14	-0.11241	-0.15837	-0.064699	-0.1777	-0.17259	-0.17214	-0.32251	-0.44784	-0.42297	-0.32617	-0.34894	-0.52186	-0.44409	-0.45279	-0.39933	-0.34529	-0.52608	-0.55719	-0.4482	-0.55901	-0.52574	-0.49279	-0.62898	-0.63704	-0.68657	-0.6852	-0.44026	-0.50831	-0.3032	-0.30263	-0.11223	-0.051086	-0.14495	-0.21016	-0.1919	-0.15251	-0.13536	-0.064561	0.14772	0.38818	0.18709	0.34378	0.2143	0.099126	0.069446	0.13068	-0.070273	-0.0017738
	PKP3	-0.13497	-0.16717	0.0012587	-0.18718	-0.18188	-0.18142	-0.33761	-0.46794	-0.46856	-0.39346	-0.478	-0.60035	-0.46417	-0.43897	-0.38946	-0.30872	-0.48783	-0.51968	-0.44289	-0.58675	-0.52571	-0.47318	-0.6038	-0.61016	-0.63796	-0.65733	-0.44857	-0.43775	-0.2996	-0.27988	-0.12046	-0.030579	-0.11109	-0.17617	-0.1913	-0.12948	-0.12308	-0.035595	0.17489	0.4174	0.17025	0.32766	0.1806	0.074416	0.12258	0.099497	-0.11294	-0.042195
	LAMP1	-0.35856	-0.36382	-0.38486	-0.36562	-0.3644	-0.36439	-0.44452	-0.52585	-0.38632	-0.20024	-0.14758	-0.50838	-0.53699	-0.5989	-0.46683	-0.49098	-0.61834	-0.53542	-0.39283	-0.49253	-0.54836	-0.56821	-0.6051	-0.52205	-0.67395	-0.62922	-0.35911	-0.55948	-0.21666	-0.37079	-0.020581	-0.016766	-0.15613	-0.32951	-0.22868	-0.28463	-0.13606	-0.21239	-0.065164	0.15691	-0.14917	-0.050961	0.086104	-0.19802	-0.20173	0.025204	0.036433	0.22636
	GJA1	-0.302	-0.37138	-0.41862	-0.37321	-0.37197	-0.37196	-0.45376	-0.53678	-0.43705	-0.30865	-0.2128	-0.45922	-0.54814	-0.60971	-0.56843	-0.55463	-0.7236	-0.6827	-0.56768	-0.61419	-0.64317	-0.67509	-0.74512	-0.71337	-0.81361	-0.7799	-0.50672	-0.63054	-0.25165	-0.34684	-0.12405	-0.10442	-0.27272	-0.36016	-0.31013	-0.33189	-0.22217	-0.25887	-0.063336	0.1212	-0.061697	0.00018965	0.079393	-0.093051	-0.18497	-0.059042	-0.025568	0.16541
	unknown 1	-0.31561	-0.37212	-0.41614	-0.37395	-0.37271	-0.3727	-0.45466	-0.53784	-0.43263	-0.28885	-0.19912	-0.47601	-0.54923	-0.61328	-0.55229	-0.54918	-0.70638	-0.65658	-0.53481	-0.59259	-0.62835	-0.65877	-0.72242	-0.67876	-0.78995	-0.75445	-0.47589	-0.62055	-0.2447	-0.3532	-0.10015	-0.090695	-0.25098	-0.35633	-0.29466	-0.32348	-0.2061	-0.25215	-0.065623	0.12856	-0.080229	-0.011735	0.084536	-0.11541	-0.18639	-0.037751	-0.017844	0.17387
	YWHAQ	-0.27124	-0.36326	-0.39862	-0.36505	-0.36383	-0.36383	-0.44384	-0.52504	-0.40737	-0.33289	-0.24723	-0.38671	-0.53616	-0.5741	-0.57554	-0.51655	-0.74132	-0.71706	-0.61946	-0.64472	-0.65146	-0.67846	-0.75849	-0.75897	-0.84042	-0.80442	-0.58432	-0.63015	-0.27102	-0.3355	-0.19449	-0.094275	-0.3014	-0.35811	-0.33765	-0.34739	-0.24433	-0.25508	-0.044561	0.11251	-0.026168	0.03393	0.039617	-0.04985	-0.20727	-0.13442	0.0045713	0.19274
	LYG2	-0.30285	-0.3673	-0.38772	-0.36911	-0.36788	-0.36787	-0.44877	-0.53087	-0.3861	-0.28846	-0.2251	-0.4103	-0.54211	-0.57719	-0.53807	-0.48987	-0.70801	-0.6638	-0.5521	-0.60244	-0.61973	-0.64023	-0.70656	-0.68548	-0.79308	-0.74996	-0.53481	-0.60893	-0.26288	-0.35488	-0.15695	-0.048759	-0.2526	-0.35088	-0.30812	-0.3341	-0.20901	-0.23652	-0.043481	0.13277	-0.066927	0.013578	0.037407	-0.099144	-0.22527	-0.10631	0.042524	0.23453
	HSPA8	-0.31464	-0.36772	-0.383	-0.36953	-0.3683	-0.36829	-0.44928	-0.53148	-0.37791	-0.26993	-0.21468	-0.42034	-0.54273	-0.57755	-0.52185	-0.47962	-0.69227	-0.64017	-0.52299	-0.58327	-0.60529	-0.62349	-0.68409	-0.65383	-0.77145	-0.72594	-0.51137	-0.59876	-0.2581	-0.36117	-0.13966	-0.032096	-0.23241	-0.34694	-0.29491	-0.32729	-0.19425	-0.22889	-0.043656	0.14012	-0.083188	0.0046491	0.038014	-0.11875	-0.23021	-0.092507	0.055248	0.24806
	PGK1	-0.21222	-0.43772	-0.4265	-0.20301	-0.22172	-0.4384	-0.53481	-0.47498	-0.40528	-0.28238	-0.23303	-0.38632	-0.64605	-0.62442	-0.6232	-0.60575	-0.80434	-0.77544	-0.65028	-0.68042	-0.72366	-0.75641	-0.79806	-0.76368	-0.81097	-0.81027	-0.5923	-0.76331	-0.30208	-0.32431	-0.19578	-0.15224	-0.47934	-0.33414	-0.33236	-0.39087	-0.21347	-0.30332	-0.095976	-0.00019702	-0.099721	-0.0473	-0.0034141	0.041352	-0.12799	-0.17197	-0.13265	0.087705
	LDHB	-0.22552	-0.35347	-0.43232	-0.35521	-0.35403	-0.35402	-0.43187	-0.51089	-0.47307	-0.39823	-0.25585	-0.39669	-0.5217	-0.58817	-0.6365	-0.59966	-0.77869	-0.78239	-0.70098	-0.69153	-0.69681	-0.74223	-0.84049	-0.85656	-0.89716	-0.8799	-0.60226	-0.66155	-0.26318	-0.29593	-0.20281	-0.20159	-0.37275	-0.36718	-0.36704	-0.35276	-0.29393	-0.29319	-0.064252	0.073902	0.028885	0.044569	0.082506	0.016949	-0.14087	-0.11874	-0.10823	0.069663
	TPI1	-0.22311	-0.35095	-0.41242	-0.35268	-0.35151	-0.3515	-0.4288	-0.50725	-0.44003	-0.38974	-0.26783	-0.35985	-0.51799	-0.56591	-0.6205	-0.55763	-0.77318	-0.77678	-0.69915	-0.68958	-0.68529	-0.72334	-0.82074	-0.84695	-0.88999	-0.86673	-0.62955	-0.65006	-0.27283	-0.30025	-0.23121	-0.16725	-0.36474	-0.36224	-0.36984	-0.35673	-0.2892	-0.27995	-0.050265	0.080102	0.029812	0.056605	0.052788	0.018192	-0.16815	-0.15618	-0.06386	0.11478
	ATP5A1	-0.27784	-0.36826	-0.43777	-0.37007	-0.36884	-0.36884	-0.44994	-0.53226	-0.47241	-0.34692	-0.22139	-0.46229	-0.54353	-0.61875	-0.60496	-0.59931	-0.74965	-0.72436	-0.61833	-0.64537	-0.67213	-0.71357	-0.7944	-0.77302	-0.85113	-0.82684	-0.52549	-0.65143	-0.25075	-0.32768	-0.13454	-0.16071	-0.31423	-0.3673	-0.3298	-0.33821	-0.25142	-0.28041	-0.072716	0.10115	-0.030594	0.0082895	0.099494	-0.055434	-0.1531	-0.056851	-0.082694	0.10403
	HSPD1	-0.26055	-0.36227	-0.45824	-0.36406	-0.36285	-0.36284	-0.44263	-0.52362	-0.51279	-0.3712	-0.21315	-0.48642	-0.5347	-0.63201	-0.62998	-0.65055	-0.75738	-0.74206	-0.64015	-0.65506	-0.68781	-0.74031	-0.82704	-0.80403	-0.86548	-0.85217	-0.50589	-0.66256	-0.23818	-0.30712	-0.11555	-0.22003	-0.34062	-0.36952	-0.33391	-0.33317	-0.26878	-0.29954	-0.088557	0.082292	-0.012021	0.0032609	0.13417	-0.032762	-0.10907	-0.024117	-0.15197	0.02846
	PLCD1	-0.2845	-0.3663	-0.45626	-0.36811	-0.36688	-0.36688	-0.44755	-0.52944	-0.5069	-0.34161	-0.19402	-0.51416	-0.54064	-0.64104	-0.60779	-0.64332	-0.7355	-0.70567	-0.59236	-0.62556	-0.66865	-0.71848	-0.79557	-0.75408	-0.83396	-0.81709	-0.46301	-0.65099	-0.2299	-0.32039	-0.080631	-0.19653	-0.30768	-0.36601	-0.31204	-0.32279	-0.24467	-0.28998	-0.091683	0.095434	-0.041938	-0.014822	0.14081	-0.068997	-0.11485	0.0065148	-0.13663	0.046595
	KRTAP1-5	-0.44431	-0.44887	-0.27229	-0.45108	-0.44958	-0.44958	-0.54844	-0.64878	-0.55608	-0.46325	-0.5634	-0.71797	-0.66251	-0.62293	-0.54564	-0.45607	-0.64631	-0.57331	-0.52551	-0.69358	-0.65884	-0.63149	-0.66771	-0.60499	-0.68916	-0.69641	-0.53263	-0.45804	-0.25199	-0.33932	-0.12998	0.016409	-0.14605	-0.29412	-0.30977	-0.29566	-0.16728	-0.18478	-0.0014649	0.21633	-0.18678	-0.09573	-0.043723	-0.24761	-0.1109	-0.15901	-0.071799	0.15714
	NEU2	-0.3059	-0.53711	-0.34342	-0.22748	-0.25229	-0.53795	-0.65625	-0.56844	-0.61188	-0.4785	-0.56737	-0.6949	-0.79274	-0.69562	-0.68451	-0.65193	-0.78932	-0.7474	-0.68567	-0.81219	-0.81481	-0.81339	-0.82455	-0.74787	-0.73709	-0.80806	-0.60683	-0.67876	-0.298	-0.28319	-0.17641	-0.1707	-0.47538	-0.27761	-0.35153	-0.3718	-0.19345	-0.2915	-0.082706	0.023398	-0.20775	-0.17359	-0.071688	-0.035348	0.047861	-0.22795	-0.3552	-0.09369
	CFL1	-0.34607	-0.47488	-0.55614	-0.26275	-0.28146	-0.44816	-0.70858	-0.24824	-0.41471	-0.4349	-0.27719	-0.1555	-0.67345	-0.50138	-0.64978	-0.54187	-0.61944	-0.56626	-0.44716	-0.57223	-0.58695	-0.56758	-0.41527	-0.29016	-0.42406	-0.33561	-0.61079	-0.43353	-0.032367	-0.27088	-0.64153	-0.30727	-0.57439	-0.60323	-0.65717	-0.74187	-0.51618	-0.67712	-0.66587	-0.74043	-0.42669	-0.53674	-0.38185	-0.28723	-0.299	-0.49982	-0.2085	0.30181
	GSDMA	-0.52653	-0.66105	-0.56687	-0.3816	-0.40103	-0.69303	-0.63372	-0.42627	-0.39139	-0.44102	-0.33398	-0.1431	-0.6028	-0.50405	-0.59785	-0.49483	-0.56499	-0.44621	-0.5297	-0.50713	-0.55597	-0.58191	-0.41576	-0.30935	-0.33585	-0.33539	-0.48282	-0.24065	-0.1581	-0.22956	-0.40629	-0.29249	-0.52412	-0.46842	-0.56924	-0.63518	-0.42845	-0.60485	-0.58338	-0.67721	-0.63204	-0.76576	-0.59869	-0.47614	-0.42788	-0.71621	-0.27132	0.1022
	RAN	-0.52031	-0.61639	-0.65976	-0.42103	-0.44106	-0.55028	-0.61518	-0.34268	-0.42556	-0.42602	-0.27022	-0.20074	-0.60515	-0.50754	-0.61249	-0.55264	-0.54174	-0.42646	-0.4394	-0.485	-0.53297	-0.55449	-0.36897	-0.22312	-0.30727	-0.27746	-0.45247	-0.29355	-0.012143	-0.21241	-0.43132	-0.30941	-0.49881	-0.52831	-0.58647	-0.66278	-0.45283	-0.64969	-0.67234	-0.77028	-0.58441	-0.80743	-0.47237	-0.45946	-0.3968	-0.61308	-0.23642	0.20914
	KRT81	-0.75615	-0.83856	-0.37557	-0.3863	-0.40737	-0.61458	-0.59508	-0.6538	-0.51241	-0.50024	-0.80878	-0.63654	-0.69463	-0.70498	-0.60037	-0.44927	-0.60778	-0.44195	-0.53371	-0.64275	-0.64747	-0.61472	-0.46655	-0.35921	-0.41004	-0.4703	-0.61197	-0.34555	-0.36504	-0.02593	-0.26557	-0.13831	-0.20953	-0.23393	-0.41078	-0.36941	-0.16692	-0.30581	-0.21888	-0.20326	-0.23035	-0.53539	-0.73624	-0.6125	-0.41133	-0.74318	-0.24452	0.11259
Keratinization	KRT80	-0.24751	-0.36281	-0.16996	0.12682	0.1203	-0.32827	-0.75037	-0.30182	-0.52629	-0.45349	-0.4828	-0.42095	-0.68519	-0.70114	-0.66702	-0.56602	-0.68768	-0.6999	-0.42718	-0.64228	-0.67008	-0.58881	-0.52319	-0.42427	-0.61544	-0.50784	-0.69739	-0.61217	-0.40036	-0.14491	-0.68204	-0.46065	-0.43729	-0.51073	-0.59097	-0.57365	-0.44182	-0.52836	-0.41057	-0.29703	0.20743	0.16518	-0.40752	-0.23592	-0.10878	-0.17785	-0.43637	0.021755
	KRTAP2-2KRTAP2-1	-0.42353	-0.62821	-0.62216	-0.27492	-0.29167	-0.43359	-0.74827	-0.42862	-0.72739	-0.71992	-0.59441	-0.455	-0.77333	-0.78598	-0.95063	-0.84089	-0.90221	-0.90098	-0.79414	-0.88684	-0.88594	-0.87983	-0.79271	-0.71407	-0.79758	-0.75748	-0.89272	-0.71182	-0.24228	-0.10386	-0.72993	-0.61081	-0.67089	-0.63208	-0.78456	-0.73518	-0.62486	-0.72919	-0.59821	-0.63405	0.030891	-0.32434	-0.43063	-0.2398	-0.23982	-0.54388	-0.50373	0.03213
	KRT33B	-0.15804	-0.3008	-0.17327	-0.38176	-0.40282	-0.39509	-0.20286	-0.57083	-0.57371	-0.56629	-0.2244	-0.2693	-0.47764	-0.24689	-0.34797	-0.27783	-0.2678	-0.31814	-0.56925	-0.47632	-0.48615	-0.43515	-0.55245	-0.50036	-0.32044	-0.48118	-0.15314	-0.20028	-0.38067	-0.73489	-0.1124	-0.35193	-0.57369	-0.43691	-0.40296	-0.4225	-0.48237	-0.38838	-0.27756	-0.10581	-0.41483	-0.22866	0.26216	0.2007	0.036546	-0.13586	-0.32431	-0.47678
	ATP5B	-0.26886	-0.23053	-0.49392	-0.63793	-0.6358	-0.20373	-0.013072	-0.45726	-0.38617	-0.35834	0.19211	-0.029338	-0.21804	-0.20033	-0.29802	-0.29955	-0.22947	-0.23264	-0.40479	-0.24168	-0.297	-0.32175	-0.41435	-0.36699	-0.34681	-0.37622	-0.046105	-0.16845	-0.13284	-0.64541	-0.060576	-0.30755	-0.35451	-0.54772	-0.39012	-0.42696	-0.51025	-0.44184	-0.41007	-0.25796	-0.34148	-0.34153	0.32599	-0.0038533	-0.305	-0.073484	0.03194	-0.054516
	KRT75	-0.63817	-0.74551	-0.79313	-0.51982	-0.53686	-0.40745	-0.29831	-0.66764	-0.52479	-0.39664	-0.033119	-0.21377	-0.51564	-0.759	-0.70531	-0.71031	-0.71552	-0.63189	-0.68219	-0.50978	-0.67541	-0.72174	-0.70079	-0.6005	-0.70372	-0.7017	-0.4669	-0.69906	-0.50322	-0.39443	-0.28518	-0.61293	-0.53242	-0.66866	-0.60188	-0.61373	-0.56547	-0.66002	-0.57273	-0.4659	0.030678	-0.38645	-0.27285	-0.33214	-0.69515	-0.45414	-0.16288	0.015555
	JUP	-0.8036	-0.7584	-0.64406	-0.76214	-0.75959	-0.47595	-0.34296	-0.88109	-0.68947	-0.64223	-0.38426	-0.46723	-0.56566	-0.76472	-0.70075	-0.59108	-0.66724	-0.5734	-0.72251	-0.63082	-0.70285	-0.69746	-0.71273	-0.63294	-0.72766	-0.74073	-0.53607	-0.47071	-0.53053	-0.46478	-0.29811	-0.48179	-0.3238	-0.6632	-0.64191	-0.57355	-0.58704	-0.57356	-0.45309	-0.23628	-0.03693	-0.36107	-0.30611	-0.50851	-0.6782	-0.50549	-0.11943	0.043221
	HSD17B10	-0.17309	-0.17641	-0.2275	-0.19599	-0.19078	-0.19033	-0.34569	-0.47584	-0.54155	-0.41794	0.0011589	-0.24733	-0.47257	-0.51388	-0.4745	-0.4465	-0.47263	-0.53574	-0.42108	-0.44407	-0.52452	-0.45898	-0.57212	-0.49149	-0.62199	-0.55869	-0.32057	-0.51815	-0.47836	-0.6629	-0.39134	-0.51225	-0.43943	-0.68381	-0.53738	-0.55074	-0.5997	-0.53358	-0.41468	-0.10284	0.12066	0.26033	0.20948	0.017168	-0.17382	0.16928	-0.21203	-0.14083
	LAP3	-0.21302	-0.24298	-0.30336	-0.25878	-0.25436	-0.254	-0.39837	-0.52343	-0.60589	-0.52092	-0.054357	-0.22601	-0.5241	-0.55506	-0.57013	-0.51039	-0.55225	-0.62211	-0.53965	-0.53313	-0.60546	-0.54482	-0.65366	-0.58293	-0.69494	-0.63469	-0.42019	-0.54449	-0.50299	-0.68514	-0.48733	-0.59034	-0.53641	-0.76047	-0.64329	-0.64536	-0.7006	-0.62833	-0.49605	-0.20939	0.087455	0.18826	0.14369	7.3106e-05	-0.22602	0.052247	-0.26005	-0.15435
	HIST2H3AHIST3H3H3F	-0.29454	-0.52582	-0.54078	-0.22466	-0.24877	-0.52664	-0.64245	-0.5578	-0.65256	-0.49365	-0.16454	-0.37169	-0.77608	-0.7468	-0.77039	-0.77766	-0.81295	-0.81084	-0.7152	-0.71836	-0.82883	-0.82957	-0.84432	-0.72324	-0.78156	-0.78417	-0.54355	-0.78171	-0.44063	-0.56568	-0.40292	-0.56396	-0.76058	-0.67321	-0.62638	-0.69918	-0.5768	-0.68002	-0.52481	-0.37856	-0.19451	-0.18337	-0.027389	-0.025434	-0.18508	-0.17551	-0.42422	-0.17174
	unknown 3	-0.37582	-0.44495	-0.49193	-0.44715	-0.44566	-0.44565	-0.54365	-0.64312	-0.63672	-0.60059	-0.21826	-0.28767	-0.65673	-0.66428	-0.72578	-0.61467	-0.75595	-0.77078	-0.72711	-0.71048	-0.75623	-0.73092	-0.79861	-0.74313	-0.84637	-0.79033	-0.62869	-0.61084	-0.45479	-0.62977	-0.51944	-0.4889	-0.57716	-0.75831	-0.70631	-0.71327	-0.68236	-0.65672	-0.48925	-0.2749	-0.093718	-0.058602	-0.04114	-0.13533	-0.36201	-0.22937	-0.19679	0.024352
	TGM3	-0.22138	-0.31075	-0.31554	-0.33155	-0.33103	-0.5834	-0.61623	-0.57013	-0.61766	-0.57142	-0.1876	-0.29345	-0.65434	-0.52823	-0.60311	-0.53594	-0.61443	-0.63723	-0.62708	-0.63318	-0.67305	-0.65107	-0.71858	-0.64451	-0.66595	-0.65382	-0.41772	-0.39838	-0.366	-0.70545	-0.37405	-0.40678	-0.60451	-0.65198	-0.59753	-0.6509	-0.60346	-0.59735	-0.44143	-0.22382	-0.4328	-0.1224	0.064891	-0.066589	-0.091418	-0.085808	-0.34476	-0.19434
	SLC25A5	-0.32093	-0.54052	-0.69984	-0.18355	-0.21238	-0.25403	-0.43652	-0.32398	-0.61612	-0.50429	-0.054524	-0.14758	-0.57001	-0.65972	-0.77167	-0.80067	-0.65972	-0.68383	-0.61429	-0.55087	-0.68338	-0.6908	-0.6262	-0.49317	-0.56772	-0.54905	-0.50329	-0.72041	-0.32559	-0.30569	-0.59067	-0.86054	-0.80002	-0.75673	-0.74663	-0.76529	-0.73534	-0.85292	-0.81909	-0.82601	0.086386	-0.33253	-0.18826	-0.075867	-0.33207	-0.32723	-0.50729	-0.18422
	HIST1H4A	-0.22646	-0.48421	-0.52983	-0.19503	-0.21825	-0.48497	-0.59161	-0.50577	-0.71328	-0.63313	-0.1603	-0.21951	-0.71467	-0.67548	-0.80589	-0.77709	-0.76159	-0.81967	-0.7912	-0.72231	-0.82191	-0.81126	-0.83848	-0.74346	-0.7443	-0.75786	-0.5678	-0.70692	-0.48075	-0.58142	-0.57225	-0.78526	-0.90562	-0.78009	-0.77053	-0.80463	-0.77511	-0.82357	-0.6828	-0.57805	-0.12729	-0.17651	-0.059421	0.048186	-0.17758	-0.24776	-0.56895	-0.34468
	SLC25A6SLC25A4	-0.20218	-0.44293	-0.51031	-0.1707	-0.1926	-0.44362	-0.54118	-0.45753	-0.7251	-0.64186	-0.11983	-0.19296	-0.65374	-0.63089	-0.77072	-0.76548	-0.67832	-0.74875	-0.73967	-0.657	-0.7646	-0.7539	-0.77665	-0.67288	-0.65937	-0.68079	-0.48125	-0.63246	-0.45514	-0.56116	-0.56068	-0.8567	-0.90318	-0.78487	-0.77055	-0.79451	-0.80523	-0.84766	-0.73441	-0.63566	-0.11688	-0.19219	-0.038261	0.049512	-0.14045	-0.20563	-0.63574	-0.4359
	SELENBP1	-0.15254	-0.4332	-0.44161	-0.050442	-0.071407	-0.56866	-0.52402	-0.42429	-0.59437	-0.47346	-0.049772	-0.17067	-0.55898	-0.60855	-0.68425	-0.75141	-0.66086	-0.69682	-0.7033	-0.55722	-0.69957	-0.74793	-0.76714	-0.68749	-0.62238	-0.67508	-0.34711	-0.56828	-0.45556	-0.41467	-0.3097	-0.75602	-0.82244	-0.56195	-0.566	-0.60568	-0.58881	-0.68457	-0.54435	-0.47319	-0.20198	-0.19196	-0.099106	0.019335	-0.068737	-0.1623	-0.68513	-0.55876
	KIF4AKIF4B	-0.16784	-0.4559	-0.46275	-0.01028	-0.046909	-0.45662	-0.55703	-0.36081	-0.6209	-0.46316	-0.050901	-0.21126	-0.67289	-0.60524	-0.66826	-0.72835	-0.59445	-0.62635	-0.5761	-0.54072	-0.68735	-0.67624	-0.64261	-0.48487	-0.47665	-0.51992	-0.33748	-0.63642	-0.40975	-0.50776	-0.431	-0.76615	-0.88672	-0.66353	-0.63233	-0.71733	-0.63987	-0.77259	-0.70518	-0.64327	-0.22422	-0.2767	-0.061143	0.053998	-0.064012	-0.15482	-0.65436	-0.44867
	UBA52RPS27AUBBUBC	-0.3379	-0.62397	-0.32795	-0.069501	-0.11491	-0.62495	-0.76238	-0.53073	-0.6183	-0.5196	-0.44298	-0.42542	-0.92096	-0.67073	-0.66888	-0.58176	-0.66616	-0.63103	-0.59397	-0.71085	-0.78488	-0.70205	-0.62247	-0.4486	-0.46564	-0.52387	-0.54935	-0.62547	-0.48476	-0.56068	-0.49641	-0.44072	-0.78742	-0.57544	-0.61842	-0.72051	-0.49311	-0.63894	-0.54323	-0.46377	-0.40605	-0.34805	-0.29112	-0.088494	-0.11511	-0.39708	-0.4937	-0.19363
	DSTN	-0.40643	-0.62643	-0.24897	-0.14173	-0.18119	-0.62741	-0.76538	-0.58072	-0.61006	-0.60257	-0.54326	-0.36534	-0.92458	-0.61378	-0.62925	-0.43792	-0.59837	-0.56444	-0.57427	-0.71027	-0.74585	-0.61496	-0.53	-0.36752	-0.40372	-0.44135	-0.61153	-0.49569	-0.53755	-0.64027	-0.63821	-0.40008	-0.74044	-0.64446	-0.70623	-0.78958	-0.5756	-0.66563	-0.58765	-0.48849	-0.43275	-0.34321	-0.40157	-0.17484	-0.22399	-0.51838	-0.39978	-0.094108
	DSG4	-0.53189	-0.73758	-0.46118	-0.37267	-0.40159	-0.73873	-0.67973	-0.82073	-0.7656	-0.67524	-0.4237	-0.46642	-0.88781	-0.78854	-0.76568	-0.66873	-0.75738	-0.71203	-0.80163	-0.77977	-0.8789	-0.82838	-0.82505	-0.68424	-0.68122	-0.75693	-0.55754	-0.61229	-0.65977	-0.71692	-0.41783	-0.57078	-0.76881	-0.70839	-0.71278	-0.76131	-0.64345	-0.71193	-0.55885	-0.36579	-0.38488	-0.35516	-0.2611	-0.21519	-0.32311	-0.44044	-0.47463	-0.29212
	unknown 2	-0.46607	-0.74468	-0.39603	-0.21778	-0.26048	-0.74585	-0.63221	-0.72315	-0.62044	-0.52168	-0.36233	-0.36913	-0.84733	-0.70521	-0.6551	-0.58105	-0.67014	-0.60717	-0.71096	-0.66917	-0.79121	-0.74548	-0.7075	-0.55974	-0.51827	-0.62674	-0.46396	-0.58718	-0.6582	-0.64655	-0.32943	-0.49832	-0.78418	-0.57306	-0.59305	-0.68015	-0.50838	-0.62735	-0.50202	-0.37808	-0.44234	-0.40829	-0.32726	-0.1592	-0.28995	-0.48248	-0.47163	-0.33027
	KRTAP4-9	-0.63304	-0.80394	-0.35195	-0.33756	-0.36286	-0.87312	-0.6906	-0.88287	-0.7001	-0.63969	-0.48528	-0.43657	-0.84769	-0.78176	-0.68467	-0.55955	-0.68038	-0.59228	-0.74651	-0.69377	-0.80997	-0.75427	-0.72004	-0.58013	-0.56681	-0.65556	-0.49027	-0.44805	-0.77027	-0.67453	-0.35838	-0.5281	-0.67418	-0.62886	-0.66496	-0.70565	-0.57665	-0.65705	-0.51466	-0.31248	-0.46783	-0.3942	-0.49028	-0.40041	-0.41364	-0.54921	-0.49197	-0.34932
	VDAC2	-0.41312	-0.63992	-0.48323	-0.26023	-0.29071	-0.64092	-0.54772	-0.67007	-0.53545	-0.46784	-0.099571	-0.11196	-0.73216	-0.65986	-0.65037	-0.5663	-0.67932	-0.64878	-0.70412	-0.58832	-0.7344	-0.70064	-0.69738	-0.58004	-0.60654	-0.63399	-0.47907	-0.62345	-0.67046	-0.74348	-0.45444	-0.58502	-0.81223	-0.74101	-0.68915	-0.78594	-0.66273	-0.73915	-0.62365	-0.4773	-0.32688	-0.2881	-0.2551	-0.12933	-0.46169	-0.42452	-0.32393	-0.19514
	ATP5C1	-0.37559	-0.53891	-0.46798	-0.19387	-0.22168	-0.53975	-0.65844	-0.54746	-0.59054	-0.4572	-0.087497	-0.23224	-0.7954	-0.68095	-0.65315	-0.61035	-0.63709	-0.60996	-0.52697	-0.56551	-0.70572	-0.64123	-0.59561	-0.40929	-0.53196	-0.50296	-0.43562	-0.63021	-0.51435	-0.73783	-0.53319	-0.58429	-0.76572	-0.81066	-0.71717	-0.83864	-0.68124	-0.7978	-0.73637	-0.56348	-0.33904	-0.27434	-0.16307	-0.16611	-0.33782	-0.23911	-0.36033	-0.09813
	HIST1H2BLHIST1H2BM	-0.47785	-0.55744	-0.26161	-0.478	-0.49984	-0.41273	-0.42415	-0.76853	-0.74944	-0.80206	-0.51163	-0.35598	-0.74612	-0.51882	-0.57826	-0.33526	-0.45907	-0.48613	-0.66864	-0.69009	-0.6897	-0.53414	-0.5828	-0.47737	-0.46658	-0.53824	-0.5429	-0.38108	-0.63755	-0.84537	-0.60848	-0.5222	-0.64368	-0.78252	-0.78202	-0.76609	-0.77601	-0.66904	-0.57551	-0.34566	-0.19792	-0.20517	-0.12267	-0.088305	-0.33992	-0.44601	-0.26826	-0.18766
	MIF	-0.52449	-0.51312	-0.44018	-0.51565	-0.51393	-0.51393	-0.34984	-0.74165	-0.58963	-0.58711	-0.050605	-0.07192	-0.50606	-0.55473	-0.54718	-0.42778	-0.47455	-0.46042	-0.60696	-0.44652	-0.56508	-0.51714	-0.56551	-0.47549	-0.54002	-0.52664	-0.33645	-0.31474	-0.64647	-0.80541	-0.45057	-0.64433	-0.56762	-0.84707	-0.74427	-0.75766	-0.80863	-0.7548	-0.67684	-0.42011	-0.23696	-0.21926	-0.1829	-0.31129	-0.59238	-0.33315	-0.21925	-0.18561
	KRT7	-0.4192	-0.45158	-0.40863	-0.45381	-0.4523	-0.45229	-0.55175	-0.6527	-0.95142	-0.88092	-0.46159	-0.58332	-0.66652	-0.67426	-0.76365	-0.71485	-0.58495	-0.62815	-0.69888	-0.73145	-0.75944	-0.71221	-0.75533	-0.63739	-0.63905	-0.67891	-0.44541	-0.37797	-0.39074	-0.5457	-0.46893	-0.75761	-0.5978	-0.75187	-0.76112	-0.68825	-0.78606	-0.74491	-0.62677	-0.39965	-0.14857	-0.21826	-0.010664	-0.20173	-0.072327	-0.14931	-0.64816	-0.44442
	KRT31	-0.09031	-0.25276	-0.14582	0.036863	0.026105	-0.39593	-0.60866	-0.45394	-0.71522	-0.58627	-0.22815	-0.37089	-0.67759	-0.61572	-0.63002	-0.60842	-0.58197	-0.67382	-0.5579	-0.62302	-0.70271	-0.62456	-0.69433	-0.58316	-0.62269	-0.61912	-0.41481	-0.56747	-0.54919	-0.61484	-0.51414	-0.7031	-0.70873	-0.6805	-0.64063	-0.65576	-0.66731	-0.66066	-0.51339	-0.26329	-0.005789	0.19284	0.061475	0.076635	0.075834	0.093781	-0.63445	-0.47838
	KRT10	-0.16869	-0.25935	0.06778	-0.093074	-0.097876	-0.63353	-0.61266	-0.61903	-0.6667	-0.62238	-0.35145	-0.37746	-0.6734	-0.46656	-0.44483	-0.34186	-0.39952	-0.44753	-0.50958	-0.55595	-0.59803	-0.49241	-0.57552	-0.47575	-0.42991	-0.48783	-0.26094	-0.2082	-0.60847	-0.80194	-0.34799	-0.4597	-0.58617	-0.57107	-0.54532	-0.57798	-0.57702	-0.52187	-0.37307	-0.064434	-0.42386	0.059743	-0.0024236	-0.044763	0.085045	-0.0011774	-0.5557	-0.54862
[truncated: 144 more columns]
