# Supplementary material for: Quantitative mapping of human hair greying and reversal in relation to life stress
Source: eLife. 2021 Jun 22;10:e67437. doi: 10.7554/eLife.67437 (PMC8219384; doi:10.7554/eLife.67437)
Supplement: Figure 5—figure supplement 1—source data 1. [file elife-67437-fig5-figsupp1-data1.xlsx]

## Sheet: A
Distance (cm)	Intensity (A.U.)
0	27
0.0008	27
0.0016	27
0.0024	27
0.0032	27
0.004	28
0.0048	28
0.0056	28
0.0064	28
0.0072	29
0.008	28
0.0088	29
0.0096	30
0.0104	31
0.0112	31
0.012	31
0.0127	35
0.0135	38
0.0143	39
0.0151	37
0.0159	33
0.0167	30
0.0175	30
0.0183	30
0.0191	30
0.0199	30
0.0207	29
0.0215	29
0.0223	29
0.0231	28
0.0239	29
0.0247	29
0.0255	30
0.0263	30
0.0271	30
0.0279	31
0.0287	32
0.0295	34
0.0303	35
0.0311	38
0.0319	39
0.0327	40
0.0335	40
0.0343	41
0.0351	41
0.0359	42
0.0366	41
0.0374	40
0.0382	40
0.039	38
0.0398	38
0.0406	37
0.0414	36
0.0422	36
0.043	37
0.0438	38
0.0446	38
0.0454	38
0.0462	39
0.047	40
0.0478	41
0.0486	41
0.0494	42
0.0502	42
0.051	43
0.0518	42
0.0526	42
0.0534	42
0.0542	42
0.055	42
0.0558	43
0.0566	44
0.0574	44
0.0582	44
0.059	45
0.0598	46
0.0605	46
0.0613	46
0.0621	46
0.0629	46
0.0637	45
0.0645	44
0.0653	44
0.0661	44
0.0669	44
0.0677	44
0.0685	44
0.0693	44
0.0701	44
0.0709	45
0.0717	45
0.0725	45
0.0733	45
0.0741	46
0.0749	45
0.0757	45
0.0765	45
0.0773	45
0.0781	46
0.0789	46
0.0797	47
0.0805	48
0.0813	48
0.0821	49
0.0829	49
0.0837	50
0.0844	49
0.0852	47
0.086	48
0.0868	49
0.0876	50
0.0884	51
0.0892	53
0.09	53
0.0908	52
0.0916	51
0.0924	51
0.0932	51
0.094	51
0.0948	52
0.0956	52
0.0964	52
0.0972	50
0.098	49
0.0988	48
0.0996	48
0.1004	48
0.1012	47
0.102	47
0.1028	47
0.1036	48
0.1044	48
0.1052	48
0.106	49
0.1068	48
0.1076	48
0.1083	48
0.1091	49
0.1099	49
0.1107	50
0.1115	50
0.1123	49
0.1131	48
0.1139	48
0.1147	49
0.1155	49
0.1163	50
0.1171	51
0.1179	50
0.1187	51
0.1195	51
0.1203	51
0.1211	51
0.1219	52
0.1227	51
0.1235	52
0.1243	52
0.1251	52
0.1259	51
0.1267	50
0.1275	49
0.1283	49
0.1291	48
0.1299	49
0.1307	48
0.1315	48
0.1322	48
0.133	48
0.1338	48
0.1346	49
0.1354	49
0.1362	49
0.137	49
0.1378	50
0.1386	51
0.1394	52
0.1402	52
0.141	52
0.1418	53
0.1426	54
0.1434	55
0.1442	56
0.145	57
0.1458	57
0.1466	58
0.1474	59
0.1482	60
0.149	61
0.1498	60
0.1506	59
0.1514	58
0.1522	57
0.153	56
0.1538	57
0.1546	58
0.1554	58
0.1562	59
0.1569	59
0.1577	58
0.1585	56
0.1593	54
0.1601	54
0.1609	54
0.1617	55
0.1625	55
0.1633	56
0.1641	57
0.1649	59
0.1657	59
0.1665	60
0.1673	61
0.1681	60
0.1689	59
0.1697	59
0.1705	58
0.1713	59
0.1721	60
0.1729	60
0.1737	60
0.1745	61
0.1753	60
0.1761	61
0.1769	62
0.1777	62
0.1785	61
0.1793	62
0.1801	61
0.1808	61
0.1816	60
0.1824	60
0.1832	59
0.184	59
0.1848	60
0.1856	61
0.1864	61
0.1872	61
0.188	62
0.1888	61
0.1896	60
0.1904	60
0.1912	60
0.192	60
0.1928	60
0.1936	59
0.1944	57
0.1952	57
0.196	57
0.1968	58
0.1976	59
0.1984	59
0.1992	59
0.2	58
0.2008	57
0.2016	56
0.2024	56
0.2032	57
0.204	57
0.2047	57
0.2055	57
0.2063	57
0.2071	58
0.2079	58
0.2087	58
0.2095	58
0.2103	59
0.2111	60
0.2119	60
0.2127	60
0.2135	61
0.2143	62
0.2151	63
0.2159	63
0.2167	63
0.2175	63
0.2183	63
0.2191	63
0.2199	62
0.2207	60
0.2215	58
0.2223	58
0.2231	58
0.2239	57
0.2247	57
0.2255	56
0.2263	56
0.2271	56
0.2279	56
0.2286	57
0.2294	58
0.2302	57
0.231	58
0.2318	59
0.2326	61
0.2334	62
0.2342	62
0.235	62
0.2358	62
0.2366	62
0.2374	61
0.2382	62
0.239	62
0.2398	62
0.2406	60
0.2414	61
0.2422	62
0.243	62
0.2438	60
0.2446	58
0.2454	58
0.2462	58
0.247	59
0.2478	59
0.2486	59
0.2494	58
0.2502	58
0.251	58
0.2518	58
0.2525	58
0.2533	58
0.2541	57
0.2549	57
0.2557	57
0.2565	58
0.2573	58
0.2581	60
0.2589	62
0.2597	64
0.2605	64
0.2613	63
0.2621	63
0.2629	63
0.2637	63
0.2645	62
0.2653	61
0.2661	61
0.2669	59
0.2677	58
0.2685	56
0.2693	55
0.2701	55
0.2709	54
0.2717	55
0.2725	55
0.2733	56
0.2741	57
0.2749	58
0.2757	59
0.2764	60
0.2772	61
0.278	60
0.2788	61
0.2796	62
0.2804	62
0.2812	60
0.282	58
0.2828	58
0.2836	58
0.2844	57
0.2852	57
0.286	58
0.2868	57
0.2876	56
0.2884	54
0.2892	54
0.29	55
0.2908	56
0.2916	57
0.2924	58
0.2932	59
0.294	59
0.2948	60
0.2956	61
0.2964	62
0.2972	63
0.298	62
0.2988	61
0.2996	59
0.3004	59
0.3011	60
0.3019	60
0.3027	60
0.3035	59
0.3043	57
0.3051	57
0.3059	58
0.3067	58
0.3075	60
0.3083	61
0.3091	62
0.3099	63
0.3107	63
0.3115	63
0.3123	62
0.3131	62
0.3139	62
0.3147	62
0.3155	63
0.3163	63
0.3171	63
0.3179	62
0.3187	63
0.3195	63
0.3203	63
0.3211	62
0.3219	62
0.3227	62
0.3235	61
0.3243	61
0.325	62
0.3258	63
0.3266	63
0.3274	63
0.3282	62
0.329	62
0.3298	63
0.3306	64
0.3314	66
0.3322	68
0.333	68
0.3338	68
0.3346	68
0.3354	69
0.3362	69
0.337	68
0.3378	68
0.3386	68
0.3394	66
0.3402	65
0.341	63
0.3418	61
0.3426	60
0.3434	60
0.3442	59
0.345	59
0.3458	60
0.3466	61
0.3474	62
0.3482	63
0.3489	63
0.3497	63
0.3505	63
0.3513	63
0.3521	64
0.3529	64
0.3537	63
0.3545	61
0.3553	61
0.3561	61
0.3569	63
0.3577	64
0.3585	65
0.3593	66
0.3601	66
0.3609	66
0.3617	67
0.3625	68
0.3633	69
0.3641	68
0.3649	67
0.3657	65
0.3665	64
0.3673	65
0.3681	66
0.3689	67
0.3697	67
0.3705	66
0.3713	65
0.3721	65
0.3728	66
0.3736	67
0.3744	67
0.3752	67
0.376	68
0.3768	69
0.3776	68
0.3784	68
0.3792	67
0.38	67
0.3808	67
0.3816	67
0.3824	68
0.3832	67
0.384	66
0.3848	67
0.3856	69
0.3864	70
0.3872	70
0.388	71
0.3888	71
0.3896	70
0.3904	68
0.3912	68
0.392	68
0.3928	68
0.3936	69
0.3944	71
0.3952	73
0.396	75
0.3967	76
0.3975	75
0.3983	74
0.3991	73
0.3999	73
0.4007	73
0.4015	72
0.4023	70
0.4031	69
0.4039	68
0.4047	69
0.4055	71
0.4063	73
0.4071	74
0.4079	73
0.4087	72
0.4095	70
0.4103	69
0.4111	69
0.4119	70
0.4127	70
0.4135	71
0.4143	72
0.4151	71
0.4159	71
0.4167	72
0.4175	72
0.4183	72
0.4191	72
0.4199	72
0.4207	73
0.4214	74
0.4222	75
0.423	75
0.4238	75
0.4246	74
0.4254	74
0.4262	74
0.427	75
0.4278	75
0.4286	75
0.4294	74
0.4302	73
0.431	73
0.4318	73
0.4326	74
0.4334	75
0.4342	75
0.435	76
0.4358	77
0.4366	77
0.4374	78
0.4382	77
0.439	76
0.4398	75
0.4406	75
0.4414	75
0.4422	74
0.443	74
0.4438	73
0.4446	72
0.4453	71
0.4461	70
0.4469	70
0.4477	70
0.4485	72
0.4493	73
0.4501	74
0.4509	74
0.4517	75
0.4525	75
0.4533	73
0.4541	73
0.4549	73
0.4557	72
0.4565	72
0.4573	73
0.4581	72
0.4589	72
0.4597	73
0.4605	73
0.4613	72
0.4621	72
0.4629	71
0.4637	71
0.4645	71
0.4653	72
0.4661	72
0.4669	73
0.4677	75
0.4685	77
0.4692	78
0.47	79
0.4708	78
0.4716	76
0.4724	74
0.4732	72
0.474	72
0.4748	73
0.4756	73
0.4764	74
0.4772	76
0.478	77
0.4788	78
0.4796	78
0.4804	80
0.4812	81
0.482	81
0.4828	81
0.4836	81
0.4844	80
0.4852	80
0.486	78
0.4868	76
0.4876	74
0.4884	73
0.4892	73
0.49	75
0.4908	76
0.4916	77
0.4924	77
0.4931	76
0.4939	75
0.4947	74
0.4955	73
0.4963	72
0.4971	71
0.4979	71
0.4987	71
0.4995	72
0.5003	73
0.5011	73
0.5019	74
0.5027	74
0.5035	73
0.5043	72
0.5051	71
0.5059	69
0.5067	68
0.5075	67
0.5083	68
0.5091	69
0.5099	69
0.5107	68
0.5115	67
0.5123	67
0.5131	67
0.5139	67
0.5147	68
0.5155	69
0.5163	70
0.517	71
0.5178	72
0.5186	74
0.5194	73
0.5202	72
0.521	72
0.5218	72
0.5226	73
0.5234	74
0.5242	74
0.525	74
0.5258	75
0.5266	76
0.5274	77
0.5282	77
0.529	77
0.5298	78
0.5306	78
0.5314	79
0.5322	78
0.533	76
0.5338	75
0.5346	74
0.5354	73
0.5362	73
0.537	73
0.5378	72
0.5386	72
0.5394	72
0.5402	72
0.5409	70
0.5417	69
0.5425	68
0.5433	67
0.5441	65
0.5449	64
0.5457	64
0.5465	64
0.5473	65
0.5481	65
0.5489	67
0.5497	68
0.5505	68
0.5513	67
0.5521	67
0.5529	68
0.5537	69
0.5545	69
0.5553	70
0.5561	70
0.5569	70
0.5577	69
0.5585	69
0.5593	70
0.5601	69
0.5609	69
0.5617	68
0.5625	70
0.5633	71
0.5641	71
0.5649	72
0.5656	71
0.5664	70
0.5672	70
0.568	70
0.5688	70
0.5696	70
0.5704	71
0.5712	70
0.572	69
0.5728	67
0.5736	66
0.5744	66
0.5752	67
0.576	67
0.5768	67
0.5776	68
0.5784	68
0.5792	69
0.58	70
0.5808	70
0.5816	70
0.5824	69
0.5832	68
0.584	67
0.5848	65
0.5856	65
0.5864	64
0.5872	63
0.588	64
0.5888	65
0.5895	65
0.5903	66
0.5911	65
0.5919	65
0.5927	65
0.5935	65
0.5943	65
0.5951	65
0.5959	65
0.5967	66
0.5975	67
0.5983	67
0.5991	67
0.5999	68
0.6007	71
0.6015	73
0.6023	75
0.6031	76
0.6039	75
0.6047	74
0.6055	74
0.6063	74
0.6071	74
0.6079	74
0.6087	74
0.6095	75
0.6103	75
0.6111	73
0.6119	72
0.6127	69
0.6134	67
0.6142	66
0.615	65
0.6158	63
0.6166	63
0.6174	64
0.6182	65
0.619	67
0.6198	68
0.6206	69
0.6214	70
0.6222	71
0.623	71
0.6238	72
0.6246	71
0.6254	71
0.6262	70
0.627	69
0.6278	69
0.6286	69
0.6294	69
0.6302	70
0.631	70
0.6318	71
0.6326	72
0.6334	74
0.6342	74
0.635	73
0.6358	72
0.6366	71
0.6373	70
0.6381	70
0.6389	69
0.6397	68
0.6405	67
0.6413	67
0.6421	68
0.6429	69
0.6437	69
0.6445	69
0.6453	69
0.6461	70
0.6469	70
0.6477	71
0.6485	71
0.6493	70
0.6501	69
0.6509	70
0.6517	70
0.6525	71
0.6533	73
0.6541	74
0.6549	75
0.6557	75
0.6565	75
0.6573	74
0.6581	73
0.6589	74
0.6597	74
0.6605	75
0.6612	74
0.662	73
0.6628	73
0.6636	73
0.6644	72
0.6652	72
0.666	71
0.6668	71
0.6676	71
0.6684	72
0.6692	73
0.67	73
0.6708	74
0.6716	73
0.6724	71
0.6732	69
0.674	68
0.6748	67
0.6756	68
0.6764	70
0.6772	72
0.678	72
0.6788	73
0.6796	73
0.6804	72
0.6812	70
0.682	70
0.6828	70
0.6836	70
0.6844	71
0.6851	73
0.6859	73
0.6867	72
0.6875	72
0.6883	72
0.6891	72
0.6899	72
0.6907	72
0.6915	72
0.6923	72
0.6931	72
0.6939	73
0.6947	73
0.6955	74
0.6963	75
0.6971	75
0.6979	74
0.6987	73
0.6995	74
0.7003	77
0.7011	78
0.7019	79
0.7027	79
0.7035	77
0.7043	76
0.7051	76
0.7059	77
0.7067	77
0.7075	78
0.7083	79
0.7091	79
0.7098	79
0.7106	79
0.7114	80
0.7122	80
0.713	80
0.7138	80
0.7146	80
0.7154	80
0.7162	79
0.717	79
0.7178	80
0.7186	80
0.7194	79
0.7202	80
0.721	80
0.7218	81
0.7226	80
0.7234	79
0.7242	78
0.725	79
0.7258	77
0.7266	76
0.7274	75
0.7282	73
0.729	71
0.7298	71
0.7306	71
0.7314	71
0.7322	71
0.733	71
0.7337	72
0.7345	72
0.7353	72
0.7361	71
0.7369	71
0.7377	70
0.7385	71
0.7393	72
0.7401	73
0.7409	73
0.7417	73
0.7425	71
0.7433	70
0.7441	70
0.7449	71
0.7457	72
0.7465	72
0.7473	73
0.7481	73
0.7489	73
0.7497	74
0.7505	75
0.7513	75
0.7521	76
0.7529	76
0.7537	76
0.7545	77
0.7553	76
0.7561	76
0.7569	74
0.7576	73
0.7584	73
0.7592	73
0.76	75
0.7608	75
0.7616	74
0.7624	73
0.7632	73
0.764	73
0.7648	72
0.7656	72
0.7664	72
0.7672	72
0.768	73
0.7688	74
0.7696	74
0.7704	74
0.7712	73
0.772	73
0.7728	73
0.7736	73
0.7744	72
0.7752	72
0.776	71
0.7768	70
0.7776	70
0.7784	71
0.7792	72
0.78	73
0.7808	72
0.7815	72
0.7823	73
0.7831	74
0.7839	75
0.7847	76
0.7855	76
0.7863	75
0.7871	73
0.7879	72
0.7887	70
0.7895	69
0.7903	68
0.7911	67
0.7919	66
0.7927	66
0.7935	67
0.7943	69
0.7951	70
0.7959	71
0.7967	71
0.7975	72
0.7983	73
0.7991	74
0.7999	74
0.8007	73
0.8015	72
0.8023	72
0.8031	73
0.8039	73
0.8047	74
0.8054	74
0.8062	74
0.807	74
0.8078	75
0.8086	76
0.8094	75
0.8102	75
0.811	74
0.8118	73
0.8126	74
0.8134	74
0.8142	74
0.815	75
0.8158	77
0.8166	79
0.8174	79
0.8182	78
0.819	76
0.8198	76
0.8206	78
0.8214	80
0.8222	82
0.823	82
0.8238	81
0.8246	79
0.8254	77
0.8262	76
0.827	75
0.8278	74
0.8286	74
0.8293	75
0.8301	75
0.8309	76
0.8317	76
0.8325	76
0.8333	75
0.8341	75
0.8349	75
0.8357	75
0.8365	75
0.8373	76
0.8381	76
0.8389	77
0.8397	78
0.8405	77
0.8413	76
0.8421	75
0.8429	75
0.8437	75
0.8445	74
0.8453	74
0.8461	73
0.8469	74
0.8477	74
0.8485	73
0.8493	73
0.8501	73
0.8509	74
0.8517	73
0.8525	73
0.8533	74
0.854	76
0.8548	77
0.8556	79
0.8564	79
0.8572	79
0.858	79
0.8588	78
0.8596	78
0.8604	78
0.8612	79
0.862	78
0.8628	77
0.8636	77
0.8644	75
0.8652	75
0.866	76
0.8668	76
0.8676	77
0.8684	78
0.8692	78
0.87	79
0.8708	80
0.8716	80
0.8724	80
0.8732	79
0.874	79
0.8748	81
0.8756	81
0.8764	83
0.8772	81
0.8779	79
0.8787	78
0.8795	77
0.8803	78
0.8811	80
0.8819	80
0.8827	79
0.8835	78
0.8843	77
0.8851	76
0.8859	77
0.8867	79
0.8875	80
0.8883	80
0.8891	81
0.8899	82
0.8907	82
0.8915	81
0.8923	81
0.8931	79
0.8939	77
0.8947	75
0.8955	75
0.8963	76
0.8971	75
0.8979	75
0.8987	74
0.8995	74
0.9003	75
0.9011	76
0.9018	78
0.9026	79
0.9034	80
0.9042	80
0.905	79
0.9058	79
0.9066	79
0.9074	80
0.9082	81
0.909	83
0.9098	85
0.9106	86
0.9114	84
0.9122	83
0.913	81
0.9138	80
0.9146	79
0.9154	78
0.9162	78
0.917	78
0.9178	78
0.9186	78
0.9194	79
0.9202	80
0.921	82
0.9218	83
0.9226	82
0.9234	81
0.9242	81
0.925	82
0.9257	83
0.9265	84
0.9273	84
0.9281	83
0.9289	83
0.9297	82
0.9305	81
0.9313	78
0.9321	77
0.9329	77
0.9337	78
0.9345	79
0.9353	79
0.9361	78
0.9369	76
0.9377	75
0.9385	74
0.9393	74
0.9401	76
0.9409	76
0.9417	75
0.9425	74
0.9433	73
0.9441	72
0.9449	72
0.9457	72
0.9465	73
0.9473	73
0.9481	74
0.9489	75
0.9496	75
0.9504	76
0.9512	77
0.952	77
0.9528	78
0.9536	77
0.9544	77
0.9552	78
0.956	78
0.9568	77
0.9576	76
0.9584	75
0.9592	74
0.96	75
0.9608	76
0.9616	77
0.9624	77
0.9632	77
0.964	76
0.9648	76
0.9656	77
0.9664	78
0.9672	79
0.968	79
0.9688	78
0.9696	78
0.9704	77
0.9712	77
0.972	78
0.9728	79
0.9736	80
0.9743	79
0.9751	77
0.9759	75
0.9767	75
0.9775	76
0.9783	77
0.9791	79
0.9799	80
0.9807	79
0.9815	78
0.9823	78
0.9831	77
0.9839	77
0.9847	77
0.9855	77
0.9863	78
0.9871	78
0.9879	78
0.9887	77
0.9895	78
0.9903	79
0.9911	79
0.9919	78
0.9927	77
0.9935	75
0.9943	74
0.9951	76
0.9959	76
0.9967	77
0.9975	78
0.9982	77
0.999	78
0.9998	76
1.0006	75
1.0014	74
1.0022	74
1.003	74
1.0038	74
1.0046	75
1.0054	76
1.0062	77
1.007	78
1.0078	77
1.0086	76
1.0094	75
1.0102	76
1.011	76
1.0118	77
1.0126	75
1.0134	75
1.0142	75
1.015	75
1.0158	77
1.0166	77
1.0174	77
1.0182	78
1.019	79
1.0198	80
1.0206	80
1.0214	79
1.0221	78
1.0229	78
1.0237	79
1.0245	79
1.0253	79
1.0261	78
1.0269	77
1.0277	77
1.0285	77
1.0293	77
1.0301	76
1.0309	77
1.0317	78
1.0325	79
1.0333	79
1.0341	79
1.0349	79
1.0357	79
1.0365	79
1.0373	80
1.0381	81
1.0389	81
1.0397	81
1.0405	81
1.0413	82
1.0421	83
1.0429	85
1.0437	84
1.0445	82
1.0453	81
1.046	81
1.0468	82
1.0476	83
1.0484	83
1.0492	82
1.05	82
1.0508	80
1.0516	79
1.0524	79
1.0532	78
1.054	79
1.0548	79
1.0556	81
1.0564	80
1.0572	80
1.058	78
1.0588	77
1.0596	76
1.0604	75
1.0612	75
1.062	75
1.0628	74
1.0636	73
1.0644	72
1.0652	72
1.066	73
1.0668	73
1.0676	74
1.0684	76
1.0692	78
1.0699	80
1.0707	82
1.0715	82
1.0723	82
1.0731	82
1.0739	81
1.0747	81
1.0755	81
1.0763	80
1.0771	79
1.0779	78
1.0787	78
1.0795	78
1.0803	79
1.0811	78
1.0819	79
1.0827	78
1.0835	79
1.0843	80
1.0851	81
1.0859	81
1.0867	81
1.0875	79
1.0883	78
1.0891	78
1.0899	78
1.0907	78
1.0915	80
1.0923	81
1.0931	81
1.0938	81
1.0946	79
1.0954	78
1.0962	78
1.097	79
1.0978	81
1.0986	80
1.0994	80
1.1002	78
1.101	77
1.1018	75
1.1026	75
1.1034	76
1.1042	77
1.105	78
1.1058	79
1.1066	79
1.1074	79
1.1082	79
1.109	79
1.1098	79
1.1106	79
1.1114	79
1.1122	77
1.113	76
1.1138	77
1.1146	76
1.1154	75
1.1162	74
1.117	73
1.1178	73
1.1185	73
1.1193	73
1.1201	74
1.1209	75
1.1217	76
1.1225	77
1.1233	79
1.1241	80
1.1249	81
1.1257	82
1.1265	82
1.1273	80
1.1281	79
1.1289	79
1.1297	78
1.1305	79
1.1313	81
1.1321	83
1.1329	83
1.1337	84
1.1345	83
1.1353	81
1.1361	79
1.1369	78
1.1377	78
1.1385	78
1.1393	78
1.1401	78
1.1409	77
1.1417	77
1.1424	76
1.1432	78
1.144	79
1.1448	80
1.1456	80
1.1464	80
1.1472	80
1.148	79
1.1488	79
1.1496	77
1.1504	75
1.1512	74
1.152	74
1.1528	74
1.1536	75
1.1544	77
1.1552	79
1.156	80
1.1568	80
1.1576	82
1.1584	82
1.1592	82
1.16	81
1.1608	80
1.1616	80
1.1624	81
1.1632	82
1.164	82
1.1648	82
1.1656	82
1.1663	83
1.1671	83
1.1679	83
1.1687	81
1.1695	79
1.1703	79
1.1711	77
1.1719	77
1.1727	77
1.1735	79
1.1743	80
1.1751	80
1.1759	80
1.1767	79
1.1775	80
1.1783	81
1.1791	82
1.1799	82
1.1807	83
1.1815	84
1.1823	84
1.1831	86
1.1839	87
1.1847	87
1.1855	85
1.1863	82
1.1871	81
1.1879	80
1.1887	81
1.1895	82
1.1902	84
1.191	84
1.1918	84
1.1926	83
1.1934	83
1.1942	83
1.195	83
1.1958	81
1.1966	81
1.1974	81
1.1982	81
1.199	82
1.1998	83
1.2006	82
1.2014	82
1.2022	81
1.203	81
1.2038	82
1.2046	83
1.2054	85
1.2062	86
1.207	87
1.2078	88
1.2086	89
1.2094	91
1.2102	94
1.211	95
1.2118	95
1.2126	93
1.2134	92
1.2141	92
1.2149	91
1.2157	92
1.2165	93
1.2173	91
1.2181	90
1.2189	88
1.2197	86
1.2205	84
1.2213	83
1.2221	82
1.2229	82
1.2237	82
1.2245	82
1.2253	83
1.2261	85
1.2269	86
1.2277	88
1.2285	88
1.2293	88
1.2301	87
1.2309	88
1.2317	88
1.2325	86
1.2333	86
1.2341	89
1.2349	89
1.2357	88
1.2365	86
1.2373	84
1.238	83
1.2388	83
1.2396	82
1.2404	81
1.2412	82
1.242	84
1.2428	85
1.2436	87
1.2444	87
1.2452	88
1.246	88
1.2468	89
1.2476	91
1.2484	92
1.2492	90
1.25	89
1.2508	89
1.2516	88
1.2524	87
1.2532	87
1.254	88
1.2548	87
1.2556	87
1.2564	87
1.2572	86
1.258	87
1.2588	87
1.2596	86
1.2604	86
1.2612	85
1.262	84
1.2627	85
1.2635	85
1.2643	87
1.2651	89
1.2659	90
1.2667	89
1.2675	87
1.2683	86
1.2691	85
1.2699	85
1.2707	85
1.2715	85
1.2723	88
1.2731	87
1.2739	87
1.2747	87
1.2755	87
1.2763	86
1.2771	86
1.2779	85
1.2787	84
1.2795	83
1.2803	81
1.2811	79
1.2819	78
1.2827	80
1.2835	82
1.2843	83
1.2851	84
1.2859	84
1.2866	84
1.2874	84
1.2882	85
1.289	87
1.2898	89
1.2906	90
1.2914	89
1.2922	88
1.293	87
1.2938	86
1.2946	85
1.2954	85
1.2962	85
1.297	83
1.2978	82
1.2986	83
1.2994	84
1.3002	85
1.301	86
1.3018	88
1.3026	88
1.3034	87
1.3042	87
1.305	85
1.3058	83
1.3066	82
1.3074	82
1.3082	83
1.309	84
1.3098	86
1.3105	88
1.3113	89
1.3121	88
1.3129	88
1.3137	86
1.3145	85
1.3153	83
1.3161	84
1.3169	82
1.3177	80
1.3185	80
1.3193	81
1.3201	82
1.3209	82
1.3217	83
1.3225	83
1.3233	83
1.3241	81
1.3249	80
1.3257	79
1.3265	79
1.3273	80
1.3281	82
1.3289	83
1.3297	82
1.3305	83
1.3313	85
1.3321	88
1.3329	90
1.3337	89
1.3344	89
1.3352	87
1.336	86
1.3368	88
1.3376	90
1.3384	90
1.3392	88
1.34	89
1.3408	89
1.3416	90
1.3424	88
1.3432	86
1.344	85
1.3448	86
1.3456	85
1.3464	86
1.3472	87
1.348	87
1.3488	86
1.3496	85
1.3504	83
1.3512	83
1.352	84
1.3528	85
1.3536	86
1.3544	88
1.3552	88
1.356	89
1.3568	89
1.3576	88
1.3583	88
1.3591	87
1.3599	87
1.3607	87
1.3615	88
1.3623	88
1.3631	87
1.3639	89
1.3647	89
1.3655	90
1.3663	91
1.3671	91
1.3679	88
1.3687	88
1.3695	87
1.3703	87
1.3711	89
1.3719	90
1.3727	92
1.3735	92
1.3743	91
1.3751	91
1.3759	89
1.3767	89
1.3775	89
1.3783	91
1.3791	93
1.3799	93
1.3807	92
1.3815	90
1.3822	88
1.383	88
1.3838	88
1.3846	89
1.3854	89
1.3862	89
1.387	88
1.3878	89
1.3886	90
1.3894	92
1.3902	93
1.391	92
1.3918	89
1.3926	88
1.3934	88
1.3942	89
1.395	88
1.3958	89
1.3966	89
1.3974	88
1.3982	88
1.399	90
1.3998	91
1.4006	90
1.4014	89
1.4022	88
1.403	88
1.4038	88
1.4046	90
1.4054	91
1.4062	92
1.4069	91
1.4077	89
1.4085	88
1.4093	86
1.4101	86
1.4109	86
1.4117	86
1.4125	87
1.4133	87
1.4141	87
1.4149	87
1.4157	87
1.4165	87
1.4173	88
1.4181	89
1.4189	89
1.4197	89
1.4205	89
1.4213	89
1.4221	88
1.4229	88
1.4237	87
1.4245	87
1.4253	87
1.4261	88
1.4269	88
1.4277	88
1.4285	88
1.4293	87
1.4301	86
1.4308	85
1.4316	85
1.4324	86
1.4332	88
1.434	91
1.4348	93
1.4356	95
1.4364	96
1.4372	98
1.438	101
1.4388	100
1.4396	101
1.4404	101
1.4412	99
1.442	97
1.4428	97
1.4436	96
1.4444	94
1.4452	92
1.446	90
1.4468	88
1.4476	87
1.4484	87
1.4492	88
1.45	89
1.4508	88
1.4516	87
1.4524	86
1.4532	85
1.454	86
1.4547	86
1.4555	87
1.4563	86
1.4571	87
1.4579	87
1.4587	87
1.4595	86
1.4603	86
1.4611	85
1.4619	85
1.4627	85
1.4635	86
1.4643	87
1.4651	88
1.4659	88
1.4667	89
1.4675	90
1.4683	88
1.4691	88
1.4699	89
1.4707	91
1.4715	91
1.4723	91
1.4731	90
1.4739	89
1.4747	88
1.4755	87
1.4763	87
1.4771	86
1.4779	87
1.4786	88
1.4794	89
1.4802	89
1.481	89
1.4818	88
1.4826	89
1.4834	90
1.4842	92
1.485	93
1.4858	91
1.4866	89
1.4874	88
1.4882	88
1.489	89
1.4898	89
1.4906	90
1.4914	89
1.4922	89
1.493	88
1.4938	90
1.4946	90
1.4954	91
1.4962	90
1.497	88
1.4978	89
1.4986	88
1.4994	88
1.5002	90
1.501	91
1.5018	93
1.5025	95
1.5033	95
1.5041	94
1.5049	95
1.5057	95
1.5065	96
1.5073	96
1.5081	96
1.5089	95
1.5097	94
1.5105	93
1.5113	92
1.5121	91
1.5129	92
1.5137	91
1.5145	90
1.5153	90
1.5161	91
1.5169	93
1.5177	93
1.5185	92
1.5193	92
1.5201	93
1.5209	93
1.5217	92
1.5225	93
1.5233	95
1.5241	96
1.5249	96
1.5257	96
1.5264	96
1.5272	96
1.528	96
1.5288	97
1.5296	97
1.5304	97
1.5312	97
1.532	97
1.5328	98
1.5336	99
1.5344	101
1.5352	100
1.536	98
1.5368	97
1.5376	97
1.5384	97
1.5392	97
1.54	98
1.5408	96
1.5416	95
1.5424	93
1.5432	92
1.544	92
1.5448	94
1.5456	95
1.5464	97
1.5472	97
1.548	95
1.5488	93
1.5496	92
1.5504	93
1.5511	95
1.5519	95
1.5527	95
1.5535	95
1.5543	94
1.5551	94
1.5559	94
1.5567	93
1.5575	92
1.5583	92
1.5591	91
1.5599	91
1.5607	90
1.5615	89
1.5623	88
1.5631	88
1.5639	88
1.5647	89
1.5655	90
1.5663	89
1.5671	89
1.5679	89
1.5687	90
1.5695	91
1.5703	89
1.5711	87
1.5719	87
1.5727	86
1.5735	86
1.5743	86
1.575	88
1.5758	89
1.5766	91
1.5774	92
1.5782	92
1.579	91
1.5798	90
1.5806	90
1.5814	90
1.5822	90
1.583	90
1.5838	90
1.5846	89
1.5854	89
1.5862	88
1.587	88
1.5878	87
1.5886	88
1.5894	88
1.5902	89
1.591	90
1.5918	91
[truncated: 3,478 more rows]

## Sheet: C (male)
Region	Temporal Right 1	Crown 5	Temporal Left20	Temporal Left1	Top 11	Temporal Right 16	Temporal Left13	Crown 10	Temporal Left24	Temporal Right 17	Temporal Right 2	Temporal Right 5	Crown 7	Temporal Left19	Crown 4	Crown 13	Crown 16	Temporal Left12	Temporal Left7	Temporal Left6	Temporal Right 13	Temporal Right 19	Top 2	Temporal Right 22	Temporal Left22	Temporal Left14	Temporal Left25	Temporal Left3	Temporal Left16	Crown 2	Temporal Left15	Temporal Right 4	Crown 17	Temporal Right 8	Temporal Right 15	Top 20	Top 16	Crown 3	Crown 6	Crown 1	Temporal Left8	Temporal Right 20	Crown 22	Top 12	Crown 24	Temporal Left17	Temporal Left5	Crown 18	Crown 9
Hair Number	25	73	20	1	56	40	13	78	23	41	26	29	75	19	72	81	84	12	7	6	37	42	49	45	22	14	24	3	16	70	15	28	85	32	39	64	60	71	74	69	8	43	90	57	92	17	5	86	77
	95.9463	100.589	124.745	107.933	107.119	112.964	121.805	109.571	106.665	112.007	94.5056	101.342	101.152	122.113	116.575	121.344	102.891	101.674	118.48	88.4832	89.3659	102.198	83.6039	97.9418	93.8564	124.745	84.3228	102.334	116.578	92.8574	97.2085	86.1839	91.6735	100.105	103.638	92.8936	103.324	103.087	99.7958	102.581	95.2688	105.377	106.239	101.139	97.7104	93.3228	109.256	112.189	100.962
	95.1908	101.871	124.745	107.933	107.119	111.213	121.805	110.359	106.665	110.171	94.5056	101.342	102.055	122.113	116.575	121.344	102.891	102.468	118.48	86.7651	89.3659	102.198	82.7239	97.0349	92.6531	122.146	83.3423	101.32	117.95	92.8574	99.0601	87.8573	90.6318	100.105	104.389	93.4566	102.635	103.087	98.9571	100.99	94.488	105.377	106.239	101.139	97.7104	93.3228	111.987	111.121	100.018
	94.4353	103.152	123.94	107.933	107.784	110.337	121.805	111.147	108.385	109.253	94.5056	102.055	103.861	122.113	115.665	120.118	102.112	104.057	118.48	86.7651	89.9697	101.252	81.8438	95.2212	92.6531	120.846	83.3423	100.307	117.95	93.5453	98.1343	88.6941	89.59	99.2107	104.389	92.8936	101.947	103.727	98.9571	100.99	93.7071	105.377	106.239	100.367	97.7104	93.3228	111.987	108.984	100.962
	93.6798	102.511	123.136	108.704	107.784	108.586	120.822	110.359	106.665	107.417	94.5056	101.342	105.667	121.136	116.575	120.118	101.332	103.262	118.48	85.9061	90.5735	101.252	81.8438	95.2212	93.8564	118.247	83.3423	99.294	119.321	94.2331	98.1343	89.5308	87.5065	99.2107	104.389	92.8936	101.947	104.368	98.9571	100.99	94.488	105.377	105.246	101.139	97.7104	93.3228	111.987	107.915	100.962
	94.4353	102.511	122.331	109.475	107.784	108.586	120.822	109.571	107.525	105.58	94.5056	100.628	105.667	121.136	117.486	118.893	102.112	102.468	117.178	87.6242	90.5735	102.198	80.9638	95.2212	93.8564	119.547	83.3423	98.2807	117.95	94.2331	98.1343	90.3675	87.5065	99.2107	105.892	92.8936	101.947	104.368	99.7958	101.785	93.7071	105.377	105.246	101.911	97.7104	93.3228	111.077	106.847	100.962
	95.1908	101.871	120.721	109.475	108.45	108.586	121.805	109.571	105.805	104.662	93.6766	101.342	105.667	119.182	118.397	120.118	101.332	102.468	114.574	87.6242	89.9697	101.252	80.0838	95.2212	93.8564	119.547	83.3423	97.2675	116.578	94.2331	96.2827	90.3675	88.5483	98.3169	105.14	92.3306	101.947	103.727	99.7958	101.785	92.9262	104.528	105.246	102.683	97.7104	93.3228	109.256	105.778	100.018
	97.4572	100.589	121.526	110.246	107.784	109.461	121.805	109.571	104.084	103.744	93.6766	100.628	106.571	118.205	120.218	120.118	100.553	100.879	113.272	86.7651	88.762	101.252	80.9638	96.128	93.8564	120.846	83.3423	97.2675	116.578	93.5453	96.2827	90.3675	90.6318	97.4231	105.14	92.3306	101.947	103.727	98.9571	101.785	93.7071	103.678	105.246	102.683	97.7104	93.3228	107.435	105.778	100.018
	99.7237	99.9486	120.721	110.246	108.45	111.213	120.822	110.359	103.224	105.58	93.6766	100.628	106.571	118.205	121.129	120.118	101.332	100.085	114.574	85.9061	88.762	101.252	80.9638	97.9418	92.6531	120.846	82.3618	97.2675	119.321	93.5453	95.3569	89.5308	92.7153	98.3169	106.643	93.4566	101.258	103.727	98.9571	101.785	96.0497	103.678	106.239	101.911	98.4507	93.3228	106.524	105.778	100.018
	101.99	99.9486	121.526	109.475	109.115	111.213	120.822	110.359	101.504	106.498	94.5056	99.9142	105.667	120.159	122.04	122.57	102.891	100.879	115.876	85.9061	88.762	100.306	81.8438	98.8486	92.6531	123.445	82.3618	98.2807	119.321	93.5453	95.3569	89.5308	93.757	98.3169	107.394	95.1456	101.258	104.368	99.7958	101.785	96.8306	102.828	107.232	101.911	98.4507	95.4682	106.524	106.847	100.018
	102.746	100.589	123.136	108.704	109.115	112.964	121.805	111.935	101.504	109.253	95.3346	99.2006	105.667	121.136	121.129	121.344	102.891	101.674	117.178	85.047	88.1582	101.252	81.8438	99.7555	92.6531	122.146	81.3813	100.307	122.064	94.9209	95.3569	87.8573	93.757	98.3169	108.145	96.2716	100.569	103.727	99.7958	100.99	97.6115	101.128	108.225	103.455	98.4507	95.4682	104.703	107.915	100.018
	104.257	100.589	123.136	109.475	109.115	112.088	122.787	111.935	101.504	109.253	95.3346	99.2006	104.764	123.09	122.04	121.344	102.891	102.468	115.876	85.047	88.762	103.144	81.8438	99.7555	92.6531	123.445	81.3813	101.32	123.436	96.2966	95.3569	87.8573	93.757	98.3169	108.896	96.8346	101.258	102.447	100.634	100.99	98.3924	97.7291	108.225	104.999	98.4507	95.4682	103.793	110.052	100.018
	104.257	101.23	123.94	108.704	108.45	112.088	125.734	112.724	101.504	109.253	95.3346	98.4869	104.764	123.09	123.861	121.344	102.891	103.262	115.876	85.9061	89.3659	104.091	82.7239	98.8486	93.8564	123.445	81.3813	102.334	123.436	95.6088	95.3569	87.8573	92.7153	98.3169	108.896	96.8346	101.258	103.087	101.473	100.195	99.1733	96.0294	108.225	105.771	98.4507	96.5408	102.882	110.052	101.905
	104.257	101.871	124.745	107.933	108.45	111.213	125.734	113.512	102.364	108.335	95.3346	97.7732	105.667	124.067	123.861	122.57	101.332	103.262	117.178	86.7651	89.3659	105.037	84.484	98.8486	92.6531	122.146	81.3813	102.334	123.436	95.6088	93.5053	87.8573	93.757	99.2107	109.647	96.2716	100.569	101.807	101.473	100.195	99.1733	94.3298	109.218	108.087	98.4507	96.5408	100.151	108.984	100.962
	104.257	101.871	123.94	107.162	108.45	111.213	124.752	113.512	103.224	109.253	95.3346	97.7732	105.667	124.067	124.772	123.796	100.553	104.057	117.178	87.6242	89.9697	105.037	87.1241	97.9418	92.6531	123.445	80.4008	102.334	122.064	96.2966	93.5053	87.8573	93.757	100.105	109.647	95.7086	99.8801	101.166	100.634	99.3999	99.1733	94.3298	109.218	108.087	98.4507	97.6135	99.2405	108.984	100.018
	106.523	102.511	123.94	105.62	108.45	112.088	124.752	114.3	104.084	109.253	95.3346	97.7732	104.764	124.067	125.683	126.247	100.553	103.262	117.178	88.4832	91.1773	105.037	89.7642	97.9418	92.6531	120.846	80.4008	103.347	119.321	94.9209	92.5795	90.3675	91.6735	100.998	109.647	95.7086	99.8801	100.526	100.634	100.195	99.1733	96.0294	110.211	108.087	97.7104	97.6135	96.5091	107.915	99.0745
	106.523	102.511	123.136	104.849	108.45	111.213	123.769	114.3	104.945	110.171	95.3346	97.7732	104.764	123.09	125.683	126.247	100.553	104.057	117.178	89.3423	91.7812	105.037	91.5243	97.9418	92.6531	120.846	80.4008	102.334	116.578	94.9209	92.5795	90.3675	89.59	100.998	110.398	95.7086	99.8801	100.526	99.7958	99.3999	100.735	96.8793	109.218	107.315	97.7104	97.6135	95.5986	105.778	98.1309
	106.523	103.152	124.745	104.849	109.115	112.088	123.769	113.512	104.945	111.089	95.3346	99.2006	104.764	122.113	124.772	128.698	101.332	104.057	118.48	88.4832	91.7812	105.037	93.2844	97.9418	93.8564	118.247	79.4203	101.32	115.207	93.5453	91.6537	91.2043	87.5065	100.998	110.398	96.2716	99.8801	100.526	98.1185	100.195	100.735	96.8793	109.218	105.771	96.9702	96.5408	95.5986	103.641	97.1873
	105.768	103.793	124.745	104.849	108.45	111.213	123.769	112.724	105.805	112.007	94.5056	99.2006	105.667	121.136	122.951	127.473	101.332	103.262	119.782	89.3423	91.7812	104.091	92.4043	97.9418	93.8564	119.547	79.4203	100.307	113.835	94.2331	91.6537	91.2043	87.5065	100.105	109.647	97.3975	100.569	101.166	98.9571	100.195	101.516	96.8793	109.218	103.455	96.9702	96.5408	96.5091	102.573	98.1309
	106.523	103.793	124.745	104.849	107.784	109.461	122.787	110.359	108.385	112.007	93.6766	99.2006	105.667	120.159	122.04	127.473	101.332	102.468	122.386	90.2014	91.1773	102.198	91.5243	97.9418	93.8564	118.247	80.4008	100.307	115.207	92.8574	92.5795	91.2043	88.5483	100.998	108.896	97.3975	101.258	101.807	99.7958	100.195	102.297	95.1796	110.211	101.911	96.9702	97.6135	98.33	102.573	97.1873
	106.523	103.793	123.94	105.62	107.119	108.586	121.805	108.782	109.246	112.007	93.6766	99.9142	105.667	120.159	120.218	127.473	102.112	101.674	124.99	90.2014	91.1773	101.252	90.6443	97.9418	95.0597	115.649	80.4008	99.294	113.835	92.8574	93.5053	90.3675	88.5483	101.892	108.145	97.9605	101.947	103.087	99.7958	99.3999	102.297	93.48	111.203	101.911	96.9702	95.4682	97.4196	102.573	97.1873
	107.279	103.793	123.136	104.849	106.454	108.586	118.858	107.994	108.385	112.925	93.6766	99.2006	105.667	121.136	119.308	126.247	102.891	102.468	126.292	91.0604	91.1773	99.3594	88.8842	97.9418	96.2629	114.349	81.3813	99.294	115.207	92.8574	94.4311	89.5308	88.5483	101.892	108.145	99.0865	101.947	103.727	100.634	99.3999	100.735	90.9305	110.211	101.911	97.7104	94.3955	97.4196	103.641	98.1309
	108.789	103.793	123.136	105.62	107.119	108.586	117.876	107.994	108.385	112.925	93.6766	99.2006	105.667	122.113	120.218	123.796	102.112	101.674	126.292	91.9195	90.5735	97.4668	87.1241	97.9418	96.2629	114.349	82.3618	98.2807	113.835	92.8574	95.3569	88.6941	89.59	101.892	108.896	99.0865	101.947	105.648	101.473	99.3999	100.735	87.5313	110.211	102.683	98.4507	93.3228	98.33	105.778	98.1309
	108.789	103.793	123.136	104.078	107.119	109.461	117.876	107.994	108.385	112.925	93.6766	99.9142	105.667	122.113	121.129	120.118	102.112	100.879	127.594	92.7785	90.5735	96.5205	86.244	97.9418	96.2629	116.948	82.3618	97.2675	115.207	93.5453	94.4311	88.6941	90.6318	101.892	108.145	99.0865	101.947	105.648	102.312	98.6047	99.9542	84.9818	109.218	102.683	98.4507	93.3228	99.2405	106.847	97.1873
	108.789	103.793	123.136	103.307	107.119	111.213	116.893	107.994	107.525	112.925	94.5056	100.628	105.667	121.136	122.04	117.667	102.112	100.085	128.896	93.6376	89.9697	95.5742	84.484	97.9418	95.0597	119.547	81.3813	96.2543	115.207	92.1696	94.4311	89.5308	91.6735	100.998	108.145	99.0865	102.635	106.289	102.312	100.195	98.3924	83.2822	109.218	102.683	98.4507	93.3228	99.2405	106.847	97.1873
	109.545	103.793	123.94	103.307	107.119	109.461	116.893	107.994	106.665	112.925	94.5056	102.055	104.764	122.113	122.04	116.441	102.891	100.085	127.594	93.6376	89.3659	94.628	83.6039	97.0349	95.0597	123.445	81.3813	95.2411	115.207	90.7939	94.4311	89.5308	91.6735	99.2107	108.896	98.5235	101.947	105.648	100.634	100.195	98.3924	82.4324	108.225	102.683	98.4507	94.3955	100.151	105.778	96.2438
	108.789	104.433	122.331	103.307	107.119	109.461	115.911	107.994	106.665	112.007	93.6766	102.769	104.764	121.136	122.951	115.216	102.891	100.085	127.594	93.6376	89.9697	94.628	82.7239	97.0349	95.0597	124.745	81.3813	93.2147	115.207	88.7305	94.4311	88.6941	89.59	99.2107	108.145	96.8346	101.947	103.727	98.9571	100.195	98.3924	82.4324	107.232	104.227	98.4507	95.4682	100.151	105.778	94.3566
	107.279	105.074	122.331	104.078	107.784	109.461	115.911	107.206	106.665	111.089	93.6766	102.769	105.667	119.182	123.861	112.764	103.671	100.085	127.594	92.7785	89.9697	94.628	82.7239	96.128	95.0597	126.044	79.4203	93.2147	115.207	88.0426	94.4311	88.6941	88.5483	99.2107	107.394	96.2716	102.635	103.087	98.1185	100.99	97.6115	81.5825	107.232	105.771	99.1909	95.4682	100.151	106.847	94.3566
	105.768	105.715	121.526	103.307	107.119	110.337	115.911	106.418	105.805	110.171	93.6766	102.055	106.571	117.228	122.951	112.764	104.45	100.879	128.896	92.7785	90.5735	95.5742	83.6039	96.128	95.0597	126.044	79.4203	94.2279	115.207	87.3548	95.3569	89.5308	87.5065	100.105	105.892	95.7086	103.324	102.447	97.2799	101.785	97.6115	81.5825	106.239	106.543	99.1909	95.4682	102.882	105.778	94.3566
	105.768	106.356	121.526	101.765	107.119	112.088	113.946	106.418	105.805	111.089	94.5056	102.769	106.571	117.228	122.04	112.764	104.45	100.879	131.5	92.7785	91.1773	94.628	85.364	97.0349	95.0597	126.044	79.4203	94.2279	115.207	86.667	96.2827	89.5308	87.5065	100.998	104.389	95.7086	104.013	103.087	97.2799	102.581	97.6115	80.7327	106.239	106.543	98.4507	94.3955	105.614	105.778	95.3002
	105.768	106.996	120.721	101.765	107.119	111.213	113.946	105.629	104.945	111.089	95.3346	103.483	106.571	116.251	122.04	113.99	104.45	100.879	132.802	92.7785	91.1773	95.5742	86.244	97.9418	95.0597	127.343	78.4398	96.2543	116.578	85.9791	97.2085	91.2043	87.5065	98.3169	102.887	96.2716	104.013	102.447	97.2799	102.581	97.6115	79.0331	106.239	106.543	97.7104	95.4682	106.524	105.778	94.3566
	106.523	107.637	120.721	100.994	106.454	110.337	114.929	105.629	105.805	108.335	96.1636	104.196	106.571	116.251	122.951	113.99	103.671	101.674	135.406	91.0604	91.7812	95.5742	86.244	97.9418	93.8564	127.343	79.4203	98.2807	116.578	86.667	98.1343	90.3675	87.5065	96.5294	101.385	97.3975	104.013	102.447	96.4413	103.376	97.6115	77.3334	106.239	107.315	97.7104	94.3955	106.524	104.71	94.3566
	105.768	107.637	120.721	100.994	106.454	111.213	115.911	105.629	105.805	106.498	96.1636	104.91	105.667	114.298	122.951	115.216	102.891	102.468	134.104	91.0604	91.7812	95.5742	86.244	98.8486	92.6531	126.044	80.4008	98.2807	116.578	86.667	99.0601	90.3675	87.5065	94.7418	100.634	97.3975	103.324	101.807	95.6027	102.581	97.6115	73.0844	106.239	107.315	98.4507	94.3955	106.524	105.778	95.3002
	105.768	106.996	120.721	101.765	106.454	111.213	115.911	105.629	106.665	106.498	96.1636	104.91	104.764	114.298	122.951	113.99	102.891	101.674	131.5	89.3423	91.1773	95.5742	86.244	99.7555	90.2465	123.445	82.3618	98.2807	116.578	85.9791	98.1343	88.6941	87.5065	93.848	100.634	97.9605	103.324	101.807	95.6027	103.376	96.0497	68.8353	105.246	108.087	98.4507	96.5408	108.345	107.915	96.2438
	105.768	105.715	120.721	103.307	106.454	112.088	113.946	104.841	106.665	106.498	96.1636	103.483	103.861	114.298	122.04	112.764	102.891	101.674	128.896	89.3423	90.5735	95.5742	85.364	100.662	90.2465	119.547	81.3813	97.2675	116.578	86.667	97.2085	87.8573	87.5065	93.848	99.8835	98.5235	103.324	101.166	94.764	102.581	96.8306	65.436	105.246	108.86	98.4507	95.4682	108.345	110.052	96.2438
	105.012	105.074	121.526	104.078	106.454	111.213	113.946	104.841	105.805	107.417	96.9926	102.769	103.861	116.251	122.04	111.539	103.671	100.879	127.594	90.2014	89.9697	95.5742	85.364	100.662	91.4498	116.948	81.3813	96.2543	115.207	84.6035	98.1343	87.0206	87.5065	94.7418	99.8835	97.9605	102.635	101.807	95.6027	102.581	96.8306	64.5862	104.253	111.176	97.7104	96.5408	109.256	113.258	96.2438
	104.257	104.433	121.526	104.849	106.454	112.088	113.946	105.629	105.805	108.335	96.1636	102.055	103.861	117.228	122.04	111.539	103.671	100.879	127.594	91.0604	88.762	95.5742	86.244	100.662	91.4498	114.349	81.3813	96.2543	115.207	84.6035	98.1343	85.3471	86.4648	95.6356	100.634	97.3975	102.635	101.807	95.6027	103.376	96.8306	65.436	104.253	111.948	97.7104	96.5408	109.256	117.532	95.3002
	103.501	103.793	121.526	105.62	106.454	112.088	114.929	105.629	104.945	109.253	95.3346	102.055	103.861	118.205	122.04	111.539	104.45	100.085	127.594	91.0604	88.762	95.5742	86.244	99.7555	91.4498	113.05	81.3813	97.2675	113.835	83.9156	97.2085	86.1839	85.423	95.6356	101.385	96.8346	102.635	101.807	96.4413	104.171	97.6115	67.1356	105.246	111.176	97.7104	96.5408	108.345	120.737	93.4131
	103.501	103.152	123.136	105.62	107.119	112.964	113.946	104.841	105.805	110.171	95.3346	102.769	103.861	118.205	120.218	111.539	106.009	99.2908	127.594	91.0604	88.762	95.5742	87.1241	98.8486	92.6531	113.05	82.3618	98.2807	111.092	83.9156	98.1343	87.0206	84.3813	95.6356	101.385	96.8346	103.324	101.807	97.2799	103.376	98.3924	69.6851	106.239	108.087	97.7104	97.6135	108.345	123.942	92.4695
	103.501	103.152	123.136	104.849	107.119	111.213	112.964	104.841	105.805	110.171	95.3346	103.483	103.861	119.182	119.308	112.764	107.568	99.2908	124.99	91.0604	88.762	95.5742	88.8842	97.9418	92.6531	113.05	83.3423	98.2807	108.349	83.9156	98.1343	88.6941	83.3396	96.5294	100.634	96.2716	104.702	101.807	98.1185	102.581	98.3924	71.3847	106.239	104.227	96.9702	97.6135	110.166	126.079	93.4131
	102.746	103.152	123.136	104.849	107.119	112.088	111.982	104.841	106.665	110.171	95.3346	104.196	104.764	119.182	119.308	110.313	108.348	99.2908	121.084	90.2014	89.3659	95.5742	88.8842	97.9418	92.6531	114.349	86.2838	97.2675	106.978	83.9156	98.1343	88.6941	82.2978	96.5294	101.385	96.2716	105.391	101.807	98.1185	102.581	99.1733	72.2345	107.232	101.139	96.9702	97.6135	112.897	128.216	93.4131
	103.501	103.152	123.136	104.849	105.788	111.213	110.017	104.841	106.665	108.335	96.1636	104.91	106.571	118.205	119.308	110.313	108.348	99.2908	117.178	91.0604	89.9697	95.5742	88.8842	97.9418	92.6531	113.05	86.2838	95.2411	105.606	84.6035	96.2827	88.6941	82.2978	97.4231	101.385	96.2716	106.08	101.807	98.1185	103.376	99.1733	73.0844	107.232	99.5949	96.9702	96.5408	112.897	129.285	93.4131
	104.257	103.152	120.721	104.078	103.792	110.337	109.035	104.841	105.805	107.417	96.9926	104.91	108.377	119.182	121.129	110.313	109.127	98.4965	117.178	91.9195	90.5735	95.5742	88.8842	98.8486	92.6531	113.05	85.3033	95.2411	105.606	84.6035	97.2085	88.6941	83.3396	97.4231	101.385	96.2716	105.391	102.447	98.1185	102.581	97.6115	76.4836	107.232	98.8228	96.23	96.5408	113.808	129.285	93.4131
	105.012	102.511	119.916	104.849	103.127	111.213	110.017	105.629	105.805	107.417	97.8216	104.91	108.377	118.205	122.04	110.313	108.348	98.4965	114.574	91.9195	90.5735	95.5742	88.8842	99.7555	92.6531	113.05	83.3423	95.2411	105.606	83.9156	95.3569	87.0206	85.423	98.3169	101.385	95.7086	104.702	101.807	98.1185	102.581	96.0497	82.4324	107.232	98.8228	96.23	94.3955	112.897	130.353	93.4131
	106.523	103.152	119.916	106.391	103.127	112.088	110.017	105.629	105.805	107.417	97.8216	106.337	109.28	117.228	122.951	111.539	108.348	97.7021	114.574	92.7785	91.1773	95.5742	88.8842	99.7555	92.6531	113.05	82.3618	95.2411	105.606	85.2913	93.5053	86.1839	86.4648	99.2107	102.136	95.7086	104.702	100.526	98.1185	103.376	95.2688	89.2309	107.232	98.8228	96.23	93.3228	112.897	131.422	93.4131
	106.523	101.871	120.721	106.391	103.792	113.84	110.999	106.418	106.665	107.417	97.8216	107.765	109.28	117.228	123.861	113.99	106.789	96.9078	113.272	91.0604	91.7812	95.5742	88.0041	99.7555	93.8564	114.349	81.3813	96.2543	106.978	85.9791	91.6537	86.1839	87.5065	99.2107	102.136	95.7086	104.702	99.8857	98.1185	104.171	94.488	96.0294	107.232	98.8228	96.23	93.3228	111.987	131.422	92.4695
	107.279	101.23	120.721	106.391	103.792	115.591	110.999	106.418	107.525	107.417	96.9926	109.192	109.28	118.205	123.861	113.99	106.789	96.1135	113.272	91.0604	92.385	96.5205	85.364	99.7555	93.8564	113.05	81.3813	97.2675	106.978	87.3548	89.8021	86.1839	89.59	99.2107	101.385	95.1456	105.391	99.8857	98.1185	103.376	95.2688	101.978	106.239	98.8228	96.23	94.3955	111.077	131.422	91.5259
	108.034	101.23	120.721	106.391	105.123	113.84	110.017	106.418	107.525	107.417	96.1636	108.478	109.28	119.182	122.951	113.99	106.789	96.1135	111.97	91.0604	92.385	96.5205	83.6039	99.7555	95.0597	113.05	81.3813	99.294	106.978	88.7305	89.8021	85.3471	88.5483	98.3169	99.8835	94.5826	106.08	99.2454	98.1185	103.376	96.0497	105.377	106.239	99.5949	96.23	95.4682	111.077	130.353	92.4695
	107.279	101.23	119.916	106.391	105.788	113.84	108.053	107.206	105.805	106.498	95.3346	107.765	110.183	119.182	122.04	113.99	106.789	95.3191	111.97	91.0604	92.385	97.4668	81.8438	99.7555	93.8564	111.75	82.3618	99.294	105.606	91.4818	90.7279	85.3471	88.5483	98.3169	99.1325	94.5826	106.08	98.6051	98.1185	104.171	97.6115	106.227	106.239	101.139	96.9702	95.4682	111.077	129.285	93.4131
	106.523	101.23	119.916	105.62	105.788	113.84	109.035	107.994	105.805	105.58	95.3346	107.051	111.989	120.159	121.129	113.99	106.009	94.5248	113.272	91.9195	91.1773	97.4668	82.7239	99.7555	93.8564	113.05	82.3618	99.294	105.606	92.8574	91.6537	84.5104	89.59	98.3169	99.1325	94.5826	105.391	98.6051	98.1185	102.581	96.8306	106.227	105.246	102.683	96.23	96.5408	109.256	128.216	94.3566
	105.768	101.871	119.916	105.62	105.123	112.964	110.999	108.782	105.805	105.58	96.1636	107.051	111.989	120.159	119.308	112.764	106.009	95.3191	114.574	93.6376	90.5735	97.4668	82.7239	100.662	92.6531	111.75	83.3423	100.307	104.235	94.2331	92.5795	84.5104	88.5483	98.3169	99.1325	95.1456	105.391	97.9648	97.2799	103.376	97.6115	105.377	105.246	104.227	96.23	97.6135	107.435	126.079	95.3002
	104.257	101.23	120.721	105.62	105.123	113.84	112.964	108.782	104.084	104.662	96.1636	107.765	111.989	119.182	117.486	111.539	105.23	96.1135	114.574	94.4967	89.9697	97.4668	80.9638	101.569	92.6531	111.75	83.3423	100.307	104.235	94.9209	94.4311	84.5104	88.5483	99.2107	99.1325	95.1456	105.391	96.6842	98.1185	103.376	97.6115	105.377	106.239	104.999	96.23	96.5408	106.524	125.011	97.1873
	105.012	100.589	121.526	105.62	104.458	114.716	113.946	108.782	104.945	103.744	96.1636	109.192	111.086	118.205	117.486	111.539	104.45	98.4965	115.876	94.4967	89.9697	97.4668	81.8438	100.662	92.6531	113.05	84.3228	99.294	104.235	94.9209	94.4311	84.5104	88.5483	100.105	99.8835	95.1456	104.702	96.6842	98.1185	103.376	97.6115	105.377	106.239	104.999	96.23	95.4682	104.703	122.874	96.2438
	105.012	99.9486	122.331	105.62	105.123	112.964	114.929	108.782	105.805	102.826	96.1636	109.906	110.183	116.251	116.575	112.764	105.23	100.085	114.574	94.4967	90.5735	97.4668	82.7239	99.7555	92.6531	113.05	85.3033	98.2807	104.235	94.2331	94.4311	83.6736	88.5483	100.105	100.634	95.7086	104.013	96.0439	98.9571	104.171	97.6115	105.377	105.246	104.227	96.23	95.4682	102.882	121.805	96.2438
	105.768	99.9486	123.136	105.62	105.788	112.088	114.929	107.994	106.665	102.826	96.1636	109.192	109.28	115.275	114.754	113.99	106.789	100.085	113.272	93.6376	91.1773	96.5205	83.6039	99.7555	93.8564	113.05	86.2838	97.2675	104.235	94.9209	95.3569	84.5104	88.5483	101.892	102.887	95.1456	103.324	95.4036	99.7958	104.171	97.6115	106.227	105.246	103.455	96.23	94.3955	101.061	122.874	97.1873
	104.257	100.589	122.331	104.849	105.788	111.213	112.964	107.206	105.805	103.744	96.9926	109.192	109.28	114.298	113.843	116.441	106.789	100.085	113.272	92.7785	90.5735	95.5742	85.364	98.8486	93.8564	114.349	86.2838	96.2543	104.235	94.9209	94.4311	86.1839	88.5483	103.68	103.638	95.1456	103.324	94.7633	100.634	104.171	97.6115	106.227	105.246	103.455	96.23	94.3955	100.151	122.874	99.0745
	103.501	101.23	122.331	104.849	105.788	112.088	112.964	106.418	106.665	104.662	96.9926	108.478	108.377	113.321	113.843	117.667	106.789	100.085	111.97	92.7785	89.9697	95.5742	87.1241	98.8486	92.6531	114.349	86.2838	95.2411	105.606	95.6088	94.4311	88.6941	87.5065	105.467	104.389	95.7086	103.324	93.4827	100.634	104.966	97.6115	107.077	105.246	102.683	96.23	96.5408	100.151	123.942	99.0745
	103.501	101.871	121.526	104.078	105.788	111.213	111.982	104.841	106.665	105.58	97.8216	107.765	108.377	115.275	112.932	117.667	106.789	99.2908	110.668	92.7785	88.762	95.5742	88.8842	97.9418	92.6531	116.948	85.3033	95.2411	105.606	95.6088	94.4311	89.5308	86.4648	104.573	105.14	95.1456	104.013	92.8424	100.634	103.376	97.6115	108.777	105.246	101.139	96.23	96.5408	99.2405	126.079	100.018
	104.257	103.152	121.526	102.536	104.458	112.088	110.017	104.841	106.665	105.58	98.6506	107.765	108.377	117.228	112.022	116.441	106.789	99.2908	109.366	91.9195	88.762	95.5742	91.5243	97.9418	92.6531	115.649	86.2838	96.2543	105.606	94.9209	95.3569	89.5308	84.3813	104.573	105.14	95.1456	104.013	93.4827	98.9571	103.376	97.6115	109.627	105.246	100.367	96.23	98.6862	98.33	127.148	100.018
	104.257	103.793	121.526	101.765	103.792	112.088	110.999	104.841	105.805	105.58	97.8216	108.478	109.28	120.159	112.932	116.441	106.009	100.085	111.97	91.9195	88.762	95.5742	92.4043	98.8486	92.6531	115.649	85.3033	97.2675	105.606	96.2966	94.4311	87.8573	84.3813	103.68	104.389	94.5826	104.013	92.8424	98.9571	101.785	98.3924	109.627	104.253	99.5949	95.4897	97.6135	98.33	127.148	99.0745
	104.257	103.152	121.526	101.765	103.127	112.964	111.982	104.841	105.805	104.662	97.8216	107.765	110.183	121.136	112.932	115.216	106.009	100.085	114.574	91.0604	89.3659	95.5742	93.2844	99.7555	93.8564	115.649	85.3033	99.294	105.606	94.9209	93.5053	86.1839	82.2978	102.786	104.389	94.5826	104.013	92.8424	98.1185	100.99	97.6115	109.627	103.26	100.367	95.4897	96.5408	96.5091	128.216	98.1309
	103.501	102.511	122.331	100.994	103.127	113.84	112.964	104.841	105.805	104.662	97.8216	108.478	111.086	122.113	112.932	113.99	105.23	100.085	117.178	91.0604	89.3659	95.5742	95.0445	100.662	93.8564	113.05	85.3033	99.294	106.978	96.2966	93.5053	83.6736	82.2978	101.892	102.887	94.5826	104.013	92.2021	98.1185	100.99	96.8306	109.627	102.267	101.911	95.4897	94.3955	94.6882	127.148	98.1309
	103.501	101.871	121.526	100.994	103.792	113.84	111.982	104.053	106.665	104.662	96.9926	109.906	111.086	121.136	112.932	115.216	106.009	98.4965	119.782	91.0604	89.9697	96.5205	94.1644	100.662	93.8564	111.75	86.2838	99.294	108.349	96.9844	93.5053	82.0002	82.2978	101.892	102.136	94.5826	104.013	92.8424	98.9571	100.195	96.8306	108.777	101.275	103.455	95.4897	93.3228	94.6882	127.148	98.1309
	104.257	101.23	121.526	100.994	103.792	113.84	110.999	103.264	105.805	104.662	96.9926	110.619	111.086	118.205	113.843	116.441	106.789	96.9078	122.386	91.9195	89.9697	96.5205	93.2844	100.662	93.8564	111.75	86.2838	99.294	108.349	98.3601	92.5795	82.0002	83.3396	102.786	101.385	94.5826	104.702	92.8424	99.7958	100.99	96.0497	108.777	99.2888	104.999	95.4897	92.2501	93.7777	126.079	97.1873
	104.257	100.589	122.331	100.994	104.458	113.84	111.982	102.476	105.805	104.662	96.9926	109.906	111.086	115.275	113.843	117.667	107.568	95.3191	123.688	91.9195	88.762	97.4668	93.2844	100.662	93.8564	110.451	87.2643	99.294	108.349	99.0479	91.6537	81.1634	84.3813	102.786	99.8835	94.5826	105.391	92.2021	99.7958	103.376	96.8306	109.627	98.2959	105.771	95.4897	93.3228	94.6882	126.079	97.1873
	104.257	100.589	122.331	101.765	103.792	112.088	112.964	102.476	104.084	103.744	96.9926	108.478	111.086	113.321	114.754	118.893	109.127	94.5248	124.99	91.9195	88.1582	97.4668	91.5243	101.569	93.8564	110.451	87.2643	101.32	108.349	99.0479	91.6537	82.0002	84.3813	101.892	97.6305	94.5826	105.391	92.2021	99.7958	103.376	96.0497	109.627	98.2959	105.771	95.4897	93.3228	95.5986	129.285	97.1873
	102.746	101.23	122.331	101.765	103.127	112.088	112.964	103.264	104.084	101.908	97.8216	107.765	111.086	113.321	115.665	118.893	109.907	95.3191	126.292	91.9195	86.9506	96.5205	90.6443	100.662	93.8564	110.451	88.2448	102.334	106.978	100.424	90.7279	82.0002	85.423	100.105	96.8795	94.5826	105.391	91.5619	98.9571	103.376	96.0497	109.627	99.2888	106.543	95.4897	92.2501	95.5986	133.559	97.1873
	101.99	101.871	123.136	100.223	103.127	112.964	113.946	104.053	103.224	100.072	98.6506	106.337	111.086	115.275	114.754	118.893	110.686	95.3191	126.292	93.6376	86.9506	95.5742	88.8842	100.662	93.8564	110.451	87.2643	104.36	108.349	101.799	91.6537	82.8369	84.3813	99.2107	96.8795	94.5826	105.391	91.5619	98.1185	104.171	95.2688	109.627	100.282	107.315	95.4897	91.1775	95.5986	135.696	97.1873
	101.99	102.511	123.94	100.223	103.792	112.088	113.946	105.629	102.364	100.072	97.8216	106.337	111.086	117.228	115.665	120.118	110.686	96.1135	126.292	92.7785	86.9506	94.628	87.1241	100.662	93.8564	111.75	87.2643	104.36	108.349	101.111	92.5795	82.0002	84.3813	98.3169	97.6305	94.5826	105.391	91.5619	97.2799	103.376	94.488	109.627	100.282	108.86	95.4897	92.2501	94.6882	137.833	97.1873
	101.99	103.152	123.136	100.223	104.458	112.964	113.946	106.418	101.504	100.072	97.8216	106.337	111.086	119.182	115.665	120.118	110.686	96.9078	126.292	94.4967	87.5544	94.628	86.244	100.662	95.0597	113.05	86.2838	103.347	106.978	99.7358	93.5053	82.0002	85.423	98.3169	97.6305	95.1456	104.702	91.5619	97.2799	103.376	94.488	109.627	99.2888	110.404	95.4897	93.3228	93.7777	137.833	97.1873
	101.99	103.152	123.94	100.994	104.458	114.716	114.929	107.206	101.504	100.072	97.8216	105.624	111.989	118.205	114.754	118.893	109.907	97.7021	127.594	94.4967	88.1582	94.628	85.364	100.662	95.0597	115.649	86.2838	102.334	105.606	100.424	93.5053	82.8369	85.423	98.3169	96.8795	95.1456	104.013	90.9216	96.4413	104.171	93.7071	110.476	98.2959	111.176	94.7495	93.3228	92.8672	137.833	97.1873
	101.235	103.793	123.136	101.765	104.458	114.716	115.911	107.206	101.504	100.99	97.8216	104.91	112.893	118.205	113.843	118.893	108.348	98.4965	128.896	93.6376	88.1582	95.5742	84.484	101.569	95.0597	118.247	85.3033	100.307	104.235	101.111	93.5053	82.8369	86.4648	99.2107	97.6305	96.2716	103.324	91.5619	95.6027	104.171	92.1453	110.476	98.2959	111.948	94.0093	94.3955	91.9568	137.833	96.2438
	103.501	103.793	121.526	102.536	104.458	114.716	115.911	107.994	101.504	101.908	96.9926	104.196	111.989	119.182	112.932	117.667	107.568	98.4965	128.896	95.3557	88.762	96.5205	82.7239	101.569	96.2629	120.846	85.3033	98.2807	102.863	101.111	94.4311	83.6736	87.5065	99.2107	96.8795	96.8346	101.947	92.2021	94.764	103.376	92.9262	110.476	98.2959	111.948	94.0093	95.4682	92.8672	137.833	95.3002
	103.501	104.433	121.526	104.078	105.123	114.716	115.911	107.206	101.504	102.826	97.8216	104.196	111.086	120.159	112.932	117.667	107.568	99.2908	128.896	94.4967	89.3659	96.5205	81.8438	101.569	96.2629	123.445	85.3033	97.2675	102.863	101.799	94.4311	83.6736	87.5065	99.2107	96.1285	96.2716	100.569	92.8424	94.764	102.581	93.7071	110.476	99.2888	111.948	94.0093	95.4682	93.7777	138.901	96.2438
	104.257	105.074	121.526	105.62	105.123	113.84	116.893	107.206	103.224	102.826	97.8216	103.483	109.28	122.113	112.022	117.667	106.789	100.085	128.896	93.6376	89.3659	97.4668	80.9638	101.569	97.4662	126.044	86.2838	98.2807	105.606	101.799	95.3569	83.6736	87.5065	99.2107	95.3775	96.8346	99.8801	92.8424	95.6027	102.581	94.488	108.777	101.275	111.948	94.0093	96.5408	94.6882	138.901	96.2438
	104.257	105.074	120.721	106.391	105.123	112.088	114.929	106.418	102.364	102.826	98.6506	102.055	108.377	122.113	112.022	118.893	107.568	100.085	130.198	92.7785	90.5735	97.4668	80.0838	100.662	97.4662	128.643	85.3033	100.307	102.863	101.799	96.2827	84.5104	86.4648	100.105	94.6264	96.8346	99.8801	92.8424	96.4413	102.581	95.2688	108.777	102.267	111.176	94.0093	97.6135	95.5986	138.901	97.1873
	103.501	105.715	119.916	104.849	105.788	110.337	114.929	105.629	103.224	101.908	96.9926	100.628	107.474	122.113	111.111	120.118	107.568	100.879	128.896	91.9195	91.7812	97.4668	78.3237	100.662	97.4662	129.942	86.2838	102.334	104.235	101.799	98.1343	85.3471	85.423	100.105	95.3775	96.2716	99.8801	92.8424	96.4413	103.376	96.8306	107.927	103.26	109.632	94.7495	96.5408	96.5091	139.969	96.2438
	102.746	105.715	119.111	104.849	105.788	109.461	114.929	104.053	103.224	101.908	96.9926	99.9142	107.474	122.113	110.2	120.118	109.127	100.879	128.896	91.0604	91.7812	96.5205	77.4436	100.662	97.4662	126.044	86.2838	103.347	104.235	102.487	99.0601	84.5104	83.3396	100.105	94.6264	96.2716	100.569	92.2021	97.2799	103.376	96.8306	107.927	104.253	108.86	95.4897	96.5408	95.5986	139.969	97.1873
	102.746	105.715	120.721	104.078	106.454	108.586	114.929	102.476	102.364	101.908	96.9926	99.9142	106.571	120.159	111.111	118.893	109.907	100.879	128.896	91.0604	91.1773	94.628	76.5636	100.662	96.2629	124.745	86.2838	104.36	102.863	102.487	99.9858	82.8369	81.2561	100.105	94.6264	96.2716	101.258	91.5619	98.1185	104.171	97.6115	107.077	104.253	108.087	96.23	95.4682	96.5091	138.901	97.1873
	101.235	105.715	123.136	103.307	106.454	108.586	113.946	102.476	102.364	101.908	96.9926	99.2006	106.571	120.159	110.2	117.667	110.686	100.085	128.896	91.9195	90.5735	93.6817	76.5636	101.569	95.0597	123.445	87.2643	107.4	102.863	103.175	99.9858	82.0002	80.2143	100.105	94.6264	96.2716	101.947	90.9216	98.1185	104.171	97.6115	106.227	104.253	107.315	96.23	96.5408	93.7777	136.764	95.3002
	101.235	105.715	121.526	102.536	105.788	108.586	113.946	102.476	103.224	102.826	97.8216	99.2006	106.571	120.159	110.2	118.893	111.466	98.4965	128.896	92.7785	89.9697	93.6817	76.5636	101.569	95.0597	123.445	85.3033	110.439	101.492	102.487	99.9858	82.0002	80.2143	100.105	95.3775	96.2716	101.947	90.9216	98.1185	104.171	96.8306	105.377	104.253	106.543	96.9702	97.6135	94.6882	134.627	94.3566
	101.235	105.074	123.136	101.765	105.123	106.834	111.982	102.476	103.224	101.908	97.8216	100.628	105.667	119.182	110.2	118.893	112.245	98.4965	126.292	92.7785	88.762	93.6817	77.4436	101.569	95.0597	122.146	84.3228	112.466	101.492	102.487	100.912	82.0002	79.1726	100.105	95.3775	96.2716	101.947	90.9216	98.1185	104.966	96.0497	104.528	105.246	105.771	97.7104	97.6135	94.6882	132.49	93.4131
	101.99	103.793	122.331	101.765	105.123	105.959	110.999	102.476	104.084	100.072	96.9926	102.055	106.571	119.182	111.111	120.118	113.025	98.4965	124.99	91.9195	89.3659	93.6817	77.4436	101.569	95.0597	126.044	84.3228	113.479	101.492	101.799	101.837	80.3267	80.2143	100.105	95.3775	96.8346	101.947	90.9216	98.1185	104.966	96.0497	104.528	106.239	105.771	96.9702	98.6862	93.7777	131.422	91.5259
	101.99	103.793	122.331	100.994	105.788	105.959	110.999	102.476	104.945	99.1537	96.1636	102.769	105.667	117.228	111.111	117.667	113.804	98.4965	124.99	91.9195	89.3659	93.6817	78.3237	100.662	95.0597	126.044	86.2838	113.479	101.492	101.799	100.912	78.6532	82.2978	101.892	96.1285	96.2716	101.258	90.9216	98.1185	105.761	95.2688	104.528	107.232	105.771	96.23	98.6862	91.9568	130.353	90.5824
	101.235	103.793	122.331	100.994	105.123	105.083	111.982	102.476	104.084	98.2356	94.5056	104.196	104.764	116.251	112.932	115.216	114.583	99.2908	124.99	90.2014	89.9697	94.628	78.3237	100.662	95.0597	126.044	87.2643	113.479	102.863	101.111	99.9858	78.6532	82.2978	100.998	97.6305	96.2716	101.258	90.9216	98.1185	106.557	96.8306	102.828	108.225	105.771	96.23	98.6862	92.8672	130.353	91.5259
	101.235	103.793	122.331	100.994	105.788	106.834	110.999	103.264	103.224	97.3176	93.6766	104.91	103.861	116.251	111.111	115.216	114.583	99.2908	123.688	88.4832	89.3659	94.628	78.3237	100.662	96.2629	123.445	89.2253	114.492	101.492	101.111	99.9858	77.8165	82.2978	100.998	96.8795	95.7086	100.569	90.9216	97.2799	107.352	97.6115	101.978	108.225	104.999	95.4897	97.6135	91.9568	128.216	91.5259
	101.235	103.793	123.94	100.223	106.454	108.586	110.999	103.264	102.364	97.3176	92.8476	105.624	103.861	116.251	111.111	115.216	114.583	99.2908	124.99	88.4832	88.762	95.5742	78.3237	100.662	97.4662	120.846	89.2253	114.492	104.235	101.111	99.0601	76.143	82.2978	100.998	98.3815	95.7086	100.569	91.5619	97.2799	107.352	97.6115	101.128	107.232	104.227	95.4897	95.4682	91.9568	126.079	92.4695
	100.479	104.433	123.136	100.223	107.119	108.586	111.982	102.476	102.364	97.3176	92.8476	106.337	103.861	116.251	112.932	117.667	114.583	100.085	126.292	88.4832	88.762	96.5205	78.3237	100.662	98.6695	118.247	89.2253	114.492	105.606	100.424	99.0601	75.3063	83.3396	99.2107	96.8795	96.2716	99.8801	92.2021	97.2799	107.352	97.6115	101.978	106.239	103.455	95.4897	94.3955	91.9568	122.874	93.4131
	101.235	105.074	123.136	100.994	107.119	106.834	112.964	101.688	102.364	97.3176	92.8476	105.624	103.861	116.251	112.932	117.667	113.804	100.879	126.292	89.3423	88.762	97.4668	78.3237	101.569	101.076	115.649	89.2253	113.479	104.235	101.111	99.0601	75.3063	83.3396	97.4231	96.1285	96.8346	100.569	93.4827	95.6027	106.557	98.3924	101.128	106.239	103.455	95.4897	93.3228	92.8672	122.874	94.3566
	101.99	105.074	123.136	101.765	106.454	105.959	112.964	100.9	104.084	96.3995	92.8476	104.91	105.667	114.298	113.843	118.893	113.804	100.879	126.292	88.4832	88.762	98.4131	77.4436	102.476	103.483	115.649	89.2253	112.466	106.978	101.111	98.1343	75.3063	83.3396	97.4231	95.3775	96.8346	99.8801	93.4827	94.764	106.557	98.3924	101.128	105.246	103.455	95.4897	94.3955	91.0463	122.874	95.3002
	103.501	104.433	120.721	101.765	105.123	105.083	111.982	100.9	104.084	97.3176	93.6766	104.196	108.377	114.298	114.754	118.893	113.804	100.085	126.292	91.0604	88.762	98.4131	78.3237	102.476	105.889	115.649	89.2253	111.452	106.978	101.111	97.2085	76.9798	84.3813	97.4231	95.3775	96.8346	98.5025	94.7633	93.9254	106.557	99.1733	101.978	105.246	104.227	95.4897	94.3955	89.2254	122.874	94.3566
	105.012	103.793	119.916	101.765	103.792	104.207	112.964	100.9	104.084	98.2356	93.6766	104.196	109.28	113.321	115.665	117.667	113.025	100.085	123.688	89.3423	88.762	99.3594	78.3237	103.383	107.093	115.649	90.2058	109.426	108.349	101.111	96.2827	76.143	85.423	96.5294	95.3775	95.7086	98.5025	96.0439	93.9254	106.557	99.1733	102.828	104.253	104.227	96.23	95.4682	87.4045	123.942	93.4131
	105.768	103.793	120.721	101.765	103.127	104.207	112.964	101.688	104.945	99.1537	94.5056	105.624	110.183	113.321	117.486	116.441	113.025	100.879	122.386	88.4832	88.1582	101.252	77.4436	103.383	108.296	116.948	91.1863	107.4	106.978	101.111	94.4311	75.3063	85.423	96.5294	95.3775	95.1456	98.5025	96.6842	93.9254	108.942	99.1733	102.828	104.253	104.227	96.23	94.3955	85.5835	123.942	92.4695
	106.523	104.433	119.111	100.994	104.458	105.083	113.946	101.688	103.224	99.1537	94.5056	107.051	110.183	113.321	118.397	116.441	112.245	101.674	118.48	86.7651	88.1582	102.198	77.4436	104.29	108.296	115.649	90.2058	105.373	106.978	100.424	92.5795	74.4695	86.4648	96.5294	96.1285	94.5826	98.5025	97.3245	94.764	108.942	97.6115	101.978	103.26	104.227	96.23	94.3955	81.9417	126.079	92.4695
	106.523	105.074	119.111	100.994	106.454	105.959	113.946	100.9	103.224	99.1537	95.3346	105.624	110.183	114.298	119.308	115.216	111.466	101.674	115.876	85.9061	88.762	102.198	78.3237	104.29	108.296	114.349	90.2058	104.36	105.606	100.424	91.6537	74.4695	87.5065	96.5294	95.3775	94.0196	98.5025	97.3245	94.764	109.737	96.0497	101.128	103.26	104.227	96.23	93.3228	80.1208	126.079	92.4695
	106.523	105.074	119.111	100.994	108.45	105.959	112.964	100.111	103.224	100.072	95.3346	104.196	110.183	115.275	119.308	115.216	111.466	100.879	113.272	86.7651	88.762	102.198	79.2037	104.29	107.093	114.349	89.2253	103.347	105.606	99.7358	91.6537	76.143	86.4648	97.4231	95.3775	94.0196	97.8136	97.3245	94.764	110.533	95.2688	101.128	104.253	103.455	96.23	93.3228	81.0312	127.148	93.4131
	105.768	105.074	119.111	101.765	109.115	105.959	112.964	97.7465	102.364	100.072	94.5056	102.055	110.183	116.251	120.218	115.216	110.686	100.879	111.97	86.7651	88.762	101.252	79.2037	104.29	108.296	113.05	88.2448	103.347	105.606	99.0479	90.7279	76.143	85.423	98.3169	95.3775	94.0196	97.1248	97.9648	94.764	112.123	94.488	101.128	104.253	103.455	95.4897	94.3955	81.9417	126.079	95.3002
	107.279	105.715	119.111	101.765	109.115	105.083	112.964	96.1699	103.224	100.072	94.5056	99.9142	109.28	115.275	120.218	115.216	111.466	100.879	109.366	86.7651	88.762	100.306	79.2037	105.197	110.702	110.451	88.2448	104.36	105.606	98.3601	90.7279	76.143	83.3396	99.2107	94.6264	93.4566	96.436	97.9648	94.764	112.123	95.2688	101.978	105.246	102.683	94.7495	93.3228	82.8521	125.011	97.1873
	107.279	105.074	120.721	101.765	109.115	104.207	111.982	95.3816	104.084	100.99	94.5056	99.2006	109.28	115.275	119.308	113.99	112.245	100.085	106.762	87.6242	89.3659	99.3594	79.2037	104.29	108.296	110.451	87.2643	105.373	105.606	96.9844	90.7279	76.143	81.2561	99.2107	93.1244	93.4566	96.436	97.9648	95.6027	112.123	96.0497	102.828	105.246	101.139	94.7495	90.1048	83.7626	123.942	98.1309
	108.789	105.715	119.916	102.536	109.115	104.207	110.999	96.1699	104.084	101.908	95.3346	99.2006	110.183	115.275	119.308	113.99	113.025	100.879	102.856	88.4832	89.3659	99.3594	79.2037	104.29	108.296	109.152	87.2643	105.373	105.606	96.2966	91.6537	75.3063	80.2143	99.2107	93.1244	92.8936	96.436	97.3245	95.6027	112.123	94.488	103.678	104.253	100.367	94.7495	90.1048	83.7626	123.942	98.1309
	108.789	106.996	119.916	102.536	109.115	105.083	111.982	97.7465	104.945	102.826	96.1636	99.2006	110.183	114.298	118.397	112.764	114.583	100.879	102.856	89.3423	89.3659	99.3594	79.2037	103.383	105.889	107.852	88.2448	104.36	106.978	96.9844	92.5795	75.3063	80.2143	100.105	91.6224	92.3306	96.436	96.6842	95.6027	112.123	94.488	104.528	103.26	99.5949	94.0093	91.1775	83.7626	122.874	98.1309
	111.056	106.356	119.916	103.307	108.45	105.083	112.964	99.323	104.945	102.826	96.9926	98.4869	111.086	115.275	119.308	111.539	115.363	100.879	101.554	87.6242	89.3659	99.3594	78.3237	103.383	105.889	107.852	89.2253	103.347	108.349	98.3601	93.5053	76.143	81.2561	100.105	91.6224	91.7676	97.1248	96.0439	96.4413	112.918	93.7071	105.377	102.267	99.5949	92.5288	92.2501	84.6731	121.805	97.1873
	110.3	106.356	119.111	104.078	108.45	105.959	113.946	100.9	105.805	101.908	96.9926	97.7732	111.086	116.251	119.308	110.313	115.363	100.085	101.554	86.7651	89.9697	99.3594	79.2037	103.383	104.686	109.152	90.2058	101.32	106.978	99.7358	93.5053	76.143	80.2143	98.3169	91.6224	91.7676	97.8136	94.7633	96.4413	112.918	93.7071	104.528	102.267	100.367	91.0484	93.3228	84.6731	120.737	97.1873
	109.545	106.356	119.111	104.078	108.45	105.959	113.946	101.688	105.805	102.826	96.9926	97.7732	110.183	117.228	119.308	109.087	115.363	100.085	101.554	85.047	89.9697	98.4131	79.2037	103.383	105.889	107.852	90.2058	101.32	106.978	100.424	92.5795	76.143	80.2143	97.4231	92.3734	91.7676	98.5025	94.123	97.2799	114.509	93.7071	103.678	102.267	100.367	91.0484	94.3955	85.5835	118.6	97.1873
	110.3	106.356	119.111	103.307	108.45	107.71	112.964	101.688	104.945	104.662	96.1636	99.2006	109.28	117.228	120.218	107.861	115.363	99.2908	100.252	85.047	90.5735	97.4668	79.2037	102.476	105.889	106.553	90.2058	101.32	108.349	100.424	93.5053	74.4695	79.1726	98.3169	92.3734	91.2046	98.5025	93.4827	98.1185	113.713	92.9262	102.828	100.282	99.5949	91.0484	95.4682	86.494	116.463	96.2438
	109.545	105.715	119.916	103.307	109.115	105.959	113.946	101.688	105.805	104.662	96.1636	100.628	108.377	116.251	120.218	106.636	115.363	98.4965	100.252	86.7651	90.5735	96.5205	80.9638	100.662	107.093	107.852	91.1863	102.334	105.606	100.424	92.5795	74.4695	78.1308	99.2107	93.1244	91.2046	99.1913	93.4827	98.1185	114.509	92.9262	101.978	100.282	100.367	90.3081	95.4682	86.494	115.395	95.3002
	108.789	105.715	119.916	103.307	108.45	105.959	113.946	102.476	104.945	106.498	96.1636	101.342	108.377	116.251	120.218	106.636	116.142	97.7021	98.9504	87.6242	89.9697	95.5742	82.7239	99.7555	109.499	106.553	92.1668	102.334	104.235	99.7358	93.5053	74.4695	78.1308	100.105	93.1244	91.2046	99.8801	94.123	98.1185	113.713	92.9262	101.978	99.2888	101.911	89.5679	96.5408	87.4045	114.326	94.3566
	108.034	105.074	119.916	102.536	108.45	106.834	114.929	103.264	104.084	107.417	96.9926	102.055	107.474	117.228	122.04	105.41	114.583	96.9078	98.9504	89.3423	89.3659	94.628	83.6039	98.8486	108.296	107.852	95.1083	102.334	102.863	99.7358	93.5053	74.4695	78.1308	100.105	93.1244	91.2046	100.569	93.4827	97.2799	113.713	92.9262	102.828	99.2888	103.455	89.5679	96.5408	86.494	114.326	94.3566
	108.789	105.074	120.721	102.536	107.119	106.834	114.929	103.264	103.224	107.417	96.9926	102.055	106.571	117.228	122.04	105.41	113.804	96.9078	98.9504	90.2014	88.762	94.628	83.6039	97.9418	109.499	109.152	97.0693	102.334	101.492	100.424	93.5053	74.4695	79.1726	98.3169	92.3734	90.6416	101.258	94.123	96.4413	112.918	92.1453	103.678	99.2888	104.999	89.5679	95.4682	87.4045	113.258	93.4131
	108.034	105.715	120.721	102.536	107.119	107.71	113.946	103.264	104.945	106.498	97.8216	100.628	106.571	117.228	121.129	106.636	113.025	97.7021	98.9504	91.0604	88.762	94.628	82.7239	97.9418	109.499	109.152	100.011	102.334	100.12	100.424	93.5053	73.6328	79.1726	96.5294	91.6224	90.6416	100.569	94.123	95.6027	112.123	91.3644	104.528	99.2888	104.999	89.5679	95.4682	88.3149	112.189	94.3566
	106.523	106.356	121.526	102.536	107.119	105.959	112.964	103.264	105.805	105.58	97.8216	99.9142	107.474	117.228	121.129	107.861	113.025	98.4965	98.9504	91.9195	89.3659	94.628	81.8438	98.8486	109.499	111.75	100.011	101.32	97.3772	101.111	93.5053	74.4695	79.1726	95.6356	91.6224	90.0787	100.569	94.123	95.6027	112.123	91.3644	106.227	99.2888	105.771	89.5679	94.3955	87.4045	111.121	95.3002
	105.768	106.356	120.721	102.536	106.454	105.959	111.982	104.053	107.525	103.744	98.6506	99.9142	107.474	117.228	120.218	109.087	112.245	99.2908	98.9504	91.9195	89.9697	96.5205	81.8438	98.8486	108.296	113.05	99.0303	100.307	94.6342	101.799	93.5053	73.6328	77.0891	95.6356	91.6224	90.0787	100.569	94.123	95.6027	110.533	91.3644	107.077	99.2888	105.771	90.3081	95.4682	86.494	110.052	96.2438
	105.768	106.356	121.526	102.536	106.454	104.207	110.999	104.841	109.246	103.744	98.6506	99.2006	107.474	118.205	119.308	110.313	112.245	99.2908	100.252	91.0604	90.5735	97.4668	83.6039	98.8486	108.296	111.75	97.0693	99.294	94.6342	103.175	94.4311	74.4695	77.0891	96.5294	92.3734	90.0787	100.569	94.123	95.6027	112.123	91.3644	107.077	99.2888	104.999	91.7886	93.3228	86.494	110.052	96.2438
	105.012	106.996	121.526	102.536	106.454	103.332	110.017	104.841	109.246	102.826	98.6506	98.4869	106.571	118.205	117.486	111.539	112.245	99.2908	100.252	91.0604	89.9697	96.5205	84.484	98.8486	109.499	113.05	95.1083	97.2675	93.2627	103.863	94.4311	74.4695	77.0891	95.6356	92.3734	90.0787	99.8801	94.7633	94.764	111.328	90.5835	106.227	100.282	104.999	91.7886	93.3228	87.4045	110.052	96.2438
	105.012	106.996	121.526	102.536	106.454	102.456	109.035	104.841	110.106	103.744	98.6506	98.4869	105.667	120.159	117.486	111.539	111.466	100.085	100.252	91.0604	89.3659	95.5742	84.484	98.8486	110.702	114.349	95.1083	95.2411	93.2627	104.551	93.5053	75.3063	78.1308	96.5294	91.6224	90.6416	99.8801	94.7633	94.764	111.328	89.8026	105.377	101.275	104.227	91.7886	94.3955	87.4045	110.052	96.2438
	104.257	106.996	121.526	103.307	107.119	104.207	109.035	104.841	110.106	103.744	98.6506	99.2006	105.667	121.136	118.397	111.539	110.686	100.085	100.252	91.0604	88.762	95.5742	83.6039	99.7555	109.499	113.05	95.1083	95.2411	93.2627	103.863	93.5053	76.143	79.1726	97.4231	91.6224	90.0787	99.1913	95.4036	93.9254	110.533	88.2408	105.377	101.275	104.227	91.7886	94.3955	87.4045	110.052	95.3002
	103.501	105.715	121.526	103.307	107.784	105.083	110.017	104.053	110.106	104.662	98.6506	100.628	105.667	121.136	119.308	111.539	110.686	100.085	100.252	93.6376	88.762	94.628	83.6039	99.7555	109.499	113.05	95.1083	95.2411	96.0057	102.487	93.5053	75.3063	80.2143	96.5294	91.6224	89.5157	99.1913	96.0439	93.0868	109.737	88.2408	105.377	101.275	103.455	91.7886	94.3955	86.494	108.984	95.3002
	102.746	105.074	121.526	103.307	108.45	105.959	112.964	104.053	108.385	103.744	99.4796	102.769	105.667	122.113	120.218	111.539	109.907	99.2908	102.856	96.2148	88.762	94.628	82.7239	101.569	108.296	111.75	95.1083	95.2411	98.7487	101.799	93.5053	76.9798	81.2561	96.5294	92.3734	89.5157	99.1913	97.3245	93.0868	108.942	88.2408	105.377	101.275	103.455	91.7886	93.3228	86.494	108.984	95.3002
	101.99	105.074	122.331	103.307	108.45	106.834	113.946	103.264	105.805	103.744	98.6506	103.483	106.571	121.136	120.218	111.539	109.907	98.4965	105.46	97.9329	88.762	94.628	81.8438	102.476	108.296	111.75	95.1083	95.2411	100.12	101.799	94.4311	77.8165	81.2561	95.6356	93.1244	89.5157	98.5025	97.9648	93.0868	108.147	88.2408	104.528	100.282	104.999	91.7886	93.3228	88.3149	107.915	95.3002
	101.99	105.074	122.331	103.307	108.45	106.834	113.946	103.264	104.945	103.744	98.6506	102.769	107.474	121.136	120.218	111.539	109.907	98.4965	108.064	98.792	89.3659	95.5742	80.0838	102.476	108.296	109.152	96.0888	95.2411	100.12	102.487	95.3569	78.6532	82.2978	95.6356	94.6264	88.9527	98.5025	97.9648	93.0868	108.942	87.4599	104.528	99.2888	105.771	91.7886	93.3228	89.2254	107.915	95.3002
	103.501	105.074	123.136	104.078	107.784	108.586	113.946	103.264	104.945	103.744	98.6506	102.055	108.377	121.136	119.308	111.539	110.686	98.4965	109.366	99.651	89.3659	96.5205	80.9638	102.476	108.296	109.152	95.1083	96.2543	98.7487	102.487	97.2085	77.8165	82.2978	94.7418	96.1285	88.9527	97.8136	98.6051	94.764	108.942	89.0217	104.528	99.2888	107.315	91.7886	93.3228	89.2254	107.915	96.2438
	103.501	105.074	121.526	104.849	107.784	107.71	110.999	103.264	104.945	104.662	98.6506	102.769	107.474	121.136	118.397	112.764	111.466	98.4965	111.97	100.51	89.3659	98.4131	80.0838	102.476	108.296	110.451	95.1083	96.2543	98.7487	102.487	99.9858	78.6532	83.3396	95.6356	96.1285	88.9527	97.8136	98.6051	96.4413	109.737	90.5835	103.678	99.2888	107.315	91.0484	93.3228	89.2254	107.915	97.1873
	105.012	105.074	121.526	105.62	107.784	108.586	111.982	103.264	106.665	105.58	98.6506	102.055	107.474	121.136	118.397	111.539	112.245	100.085	113.272	101.369	89.3659	100.306	80.0838	102.476	107.093	107.852	94.1278	98.2807	98.7487	103.175	101.837	78.6532	83.3396	95.6356	96.8795	89.5157	97.8136	99.2454	97.2799	108.147	91.3644	103.678	99.2888	105.771	91.0484	94.3955	88.3149	108.984	98.1309
	104.257	105.715	123.136	105.62	107.784	108.586	112.964	103.264	106.665	105.58	98.6506	102.769	108.377	120.159	117.486	111.539	113.025	100.879	115.876	103.087	88.762	101.252	80.0838	103.383	107.093	107.852	94.1278	100.307	96.0057	103.863	101.837	76.9798	83.3396	95.6356	96.1285	90.0787	98.5025	99.8857	98.9571	107.352	91.3644	103.678	99.2888	104.999	91.0484	93.3228	87.4045	110.052	100.962
	103.501	105.715	122.331	105.62	107.784	109.461	110.999	102.476	105.805	105.58	97.8216	102.769	109.28	118.205	117.486	111.539	114.583	102.468	118.48	103.946	88.1582	101.252	80.0838	103.383	105.889	106.553	94.1278	102.334	94.6342	104.551	101.837	76.143	83.3396	93.848	96.1285	90.6416	99.1913	99.8857	98.9571	106.557	91.3644	104.528	100.282	103.455	91.0484	94.3955	84.6731	110.052	102.849
	102.746	105.715	121.526	104.849	108.45	109.461	110.017	101.688	105.805	106.498	97.8216	102.055	111.086	118.205	118.397	110.313	114.583	103.262	118.48	103.087	87.5544	102.198	80.0838	104.29	105.889	105.253	95.1083	103.347	93.2627	105.238	100.912	76.143	82.2978	93.848	94.6264	90.6416	99.1913	99.8857	99.7958	105.761	90.5835	103.678	100.282	102.683	91.0484	94.3955	82.8521	111.121	103.792
	102.746	105.074	119.916	103.307	108.45	110.337	109.035	101.688	108.385	107.417	97.8216	102.769	111.086	118.205	119.308	109.087	114.583	102.468	118.48	101.369	86.9506	102.198	80.0838	103.383	105.889	105.253	96.0888	103.347	93.2627	105.926	99.0601	75.3063	83.3396	92.9542	94.6264	90.0787	99.1913	99.2454	98.1185	104.171	89.8026	103.678	101.275	103.455	90.3081	94.3955	85.5835	111.121	104.736
	103.501	104.433	118.307	102.536	109.115	110.337	109.035	101.688	110.106	106.498	97.8216	103.483	110.183	118.205	120.218	107.861	114.583	101.674	118.48	97.9329	86.3468	102.198	80.0838	102.476	105.889	103.954	96.0888	102.334	94.6342	105.926	98.1343	76.143	84.3813	92.9542	93.1244	90.0787	98.5025	99.2454	97.2799	104.171	89.8026	103.678	101.275	103.455	89.5679	95.4682	86.494	111.121	105.679
	104.257	103.793	116.697	101.765	109.115	108.586	108.053	101.688	111.826	106.498	98.6506	104.196	108.377	118.205	122.04	106.636	114.583	100.879	118.48	95.3557	85.1391	102.198	79.2037	101.569	107.093	105.253	96.0888	100.307	94.6342	105.238	98.1343	77.8165	84.3813	92.9542	92.3734	90.0787	98.5025	98.6051	95.6027	103.376	89.0217	104.528	101.275	102.683	89.5679	94.3955	88.3149	112.189	105.679
	105.012	103.793	116.697	100.994	109.78	108.586	109.035	100.9	111.826	106.498	98.6506	104.91	108.377	118.205	122.951	107.861	114.583	100.879	117.178	92.7785	85.1391	101.252	79.2037	99.7555	105.889	105.253	98.0498	99.294	94.6342	104.551	98.1343	78.6532	84.3813	93.848	93.1244	90.0787	98.5025	97.9648	94.764	104.171	89.0217	104.528	101.275	101.139	89.5679	94.3955	89.2254	112.189	105.679
	104.257	104.433	117.502	100.994	110.446	107.71	109.035	100.111	110.106	105.58	98.6506	105.624	109.28	117.228	122.951	109.087	114.583	100.879	113.272	91.0604	85.1391	101.252	78.3237	98.8486	107.093	105.253	98.0498	99.294	91.8912	103.175	98.1343	79.49	83.3396	96.5294	92.3734	90.6416	98.5025	97.3245	94.764	104.171	89.0217	104.528	101.275	98.8228	88.8277	93.3228	91.0463	112.189	105.679
	105.012	106.356	116.697	100.994	111.111	107.71	109.035	100.111	107.525	105.58	99.4796	107.051	109.28	116.251	124.772	109.087	114.583	100.879	109.366	89.3423	85.1391	101.252	77.4436	97.9418	107.093	105.253	98.0498	98.2807	90.5197	102.487	98.1343	81.1634	81.2561	96.5294	92.3734	91.2046	98.5025	97.3245	94.764	104.966	89.0217	105.377	101.275	96.5067	88.8277	93.3228	90.1359	111.121	104.736
	104.257	106.996	116.697	100.994	111.111	107.71	108.053	100.111	108.385	106.498	98.6506	108.478	109.28	114.298	124.772	109.087	114.583	100.085	106.762	88.4832	85.7429	101.252	77.4436	97.0349	105.889	106.553	99.0303	98.2807	91.8912	103.175	97.2085	81.1634	79.1726	98.3169	93.1244	91.7676	98.5025	97.3245	94.764	104.966	89.0217	105.377	102.267	94.1905	88.8277	91.1775	90.1359	110.052	104.736
	104.257	106.996	117.502	100.994	111.111	107.71	107.07	100.111	107.525	106.498	97.8216	109.192	108.377	113.321	126.594	109.087	113.804	100.085	104.158	88.4832	85.7429	100.306	76.5636	97.0349	105.889	106.553	99.0303	98.2807	91.8912	103.175	98.1343	82.0002	78.1308	98.3169	93.1244	91.7676	99.1913	97.9648	93.0868	105.761	89.0217	105.377	103.26	92.6464	88.8277	91.1775	89.2254	110.052	103.792
	103.501	106.356	117.502	100.994	111.111	108.586	106.088	99.323	105.805	105.58	98.6506	108.478	108.377	114.298	127.504	110.313	114.583	100.085	102.856	89.3423	86.9506	100.306	75.6836	97.9418	105.889	107.852	99.0303	98.2807	91.8912	103.175	99.0601	82.0002	79.1726	97.4231	93.8754	91.2046	99.1913	98.6051	93.0868	105.761	89.0217	104.528	104.253	91.8744	89.5679	90.1048	88.3149	110.052	102.849
	105.012	105.715	117.502	100.994	111.111	108.586	106.088	98.5347	104.945	104.662	97.8216	107.765	108.377	115.275	127.504	111.539	115.363	99.2908	100.252	90.2014	86.9506	100.306	75.6836	99.7555	105.889	106.553	98.0498	98.2807	90.5197	103.863	99.0601	82.8369	79.1726	98.3169	92.3734	90.6416	99.1913	99.2454	93.0868	105.761	89.8026	103.678	103.26	91.8744	90.3081	90.1048	89.2254	108.984	102.849
	105.012	106.356	117.502	102.536	110.446	108.586	106.088	97.7465	103.224	105.58	97.8216	106.337	108.377	116.251	127.504	112.764	115.363	98.4965	98.9504	92.7785	86.9506	100.306	74.8035	100.662	108.296	107.852	97.0693	99.294	90.5197	104.551	99.0601	83.6736	79.1726	97.4231	92.3734	90.6416	99.8801	98.6051	93.0868	103.376	89.0217	102.828	103.26	91.1023	91.0484	90.1048	91.0463	107.915	103.792
	105.012	106.996	118.307	102.536	110.446	108.586	106.088	96.9582	102.364	105.58	97.8216	105.624	109.28	117.228	125.683	113.99	116.142	98.4965	98.9504	92.7785	86.3468	100.306	73.9235	101.569	109.499	107.852	96.0888	99.294	90.5197	104.551	99.0601	83.6736	79.1726	96.5294	91.6224	90.0787	99.8801	98.6051	93.0868	102.581	88.2408	101.978	101.275	92.6464	91.0484	91.1775	93.7777	107.915	102.849
	105.012	108.278	119.111	102.536	109.78	107.71	106.088	96.9582	102.364	107.417	97.8216	106.337	110.183	119.182	126.594	112.764	116.142	98.4965	100.252	92.7785	85.1391	100.306	73.9235	101.569	110.702	109.152	96.0888	99.294	90.5197	105.238	98.1343	85.3471	79.1726	96.5294	91.6224	89.5157	99.8801	97.3245	93.9254	102.581	88.2408	101.978	100.282	94.1905	91.0484	90.1048	97.4196	106.847	102.849
	105.012	108.278	117.502	102.536	109.115	109.461	107.07	97.7465	103.224	107.417	96.9926	106.337	110.183	118.205	124.772	111.539	116.142	99.2908	101.554	93.6376	83.9315	100.306	73.9235	100.662	110.702	110.451	97.0693	99.294	91.8912	104.551	97.2085	86.1839	79.1726	96.5294	91.6224	89.5157	99.8801	97.9648	93.9254	101.785	88.2408	101.128	100.282	98.0508	90.3081	91.1775	97.4196	106.847	102.849
	105.012	108.278	117.502	102.536	107.784	109.461	107.07	98.5347	104.945	107.417	97.8216	107.051	111.086	119.182	125.683	111.539	116.142	100.085	104.158	92.7785	82.7238	99.3594	73.9235	101.569	110.702	110.451	99.0303	99.294	91.8912	104.551	98.1343	87.8573	80.2143	95.6356	91.6224	89.5157	99.8801	98.6051	93.9254	100.99	88.2408	101.128	100.282	100.367	89.5679	91.1775	98.33	107.915	102.849
	105.012	108.278	118.307	102.536	107.784	108.586	108.053	98.5347	106.665	107.417	98.6506	107.765	111.989	119.182	126.594	111.539	116.142	100.085	105.46	91.9195	82.7238	99.3594	73.0434	102.476	111.906	110.451	100.991	99.294	93.2627	104.551	99.0601	87.8573	81.2561	95.6356	92.3734	90.6416	99.8801	98.6051	94.764	101.785	87.4599	101.128	102.267	101.911	89.5679	92.2501	98.33	105.778	102.849
	105.012	107.637	117.502	101.765	107.784	108.586	109.035	97.7465	107.525	107.417	99.4796	107.765	111.086	119.182	127.504	111.539	116.142	100.085	108.064	90.2014	82.12	99.3594	73.9235	103.383	113.109	110.451	100.991	99.294	94.6342	103.863	99.9858	89.5308	81.2561	96.5294	92.3734	91.2046	99.1913	98.6051	94.764	100.99	86.679	101.128	104.253	101.139	88.8277	92.2501	96.5091	103.641	103.792
	105.012	107.637	116.697	102.536	107.119	108.586	109.035	96.9582	106.665	106.498	100.309	108.478	111.086	117.228	126.594	111.539	114.583	100.085	111.97	89.3423	82.12	98.4131	73.9235	104.29	113.109	111.75	101.972	99.294	96.0057	103.863	100.912	89.5308	80.2143	97.4231	92.3734	91.7676	99.1913	97.9648	93.9254	101.785	85.8981	100.279	104.253	100.367	88.8277	92.2501	97.4196	102.573	105.679
	106.523	106.996	115.087	102.536	107.784	109.461	110.017	96.1699	104.945	105.58	100.309	109.192	111.989	116.251	127.504	110.313	114.583	100.085	113.272	88.4832	82.12	98.4131	73.9235	105.197	113.109	111.75	102.952	98.2807	97.3772	103.175	99.0601	87.8573	79.1726	98.3169	93.1244	91.7676	99.1913	97.3245	94.764	100.99	85.1173	99.4287	104.253	100.367	88.8277	91.1775	95.5986	100.436	107.567
	107.279	106.996	113.478	102.536	107.784	108.586	110.017	95.3816	103.224	104.662	100.309	109.192	111.989	114.298	126.594	109.087	113.804	100.879	114.574	89.3423	83.3276	98.4131	73.9235	105.197	113.109	110.451	103.933	96.2543	98.7487	101.799	98.1343	88.6941	78.1308	97.4231	93.1244	92.3306	99.1913	97.3245	94.764	100.99	84.3364	98.5789	105.246	99.5949	88.8277	90.1048	96.5091	99.3676	108.51
	108.034	106.996	113.478	101.765	109.115	109.461	111.982	95.3816	102.364	103.744	100.309	109.906	111.086	112.344	125.683	106.636	113.804	100.085	115.876	89.3423	83.9315	97.4668	73.0434	106.104	113.109	111.75	103.933	95.2411	97.3772	101.799	96.2827	88.6941	79.1726	97.4231	93.1244	92.3306	99.8801	97.3245	95.6027	100.195	84.3364	98.5789	107.232	98.8228	89.5679	90.1048	95.5986	99.3676	110.397
	108.034	107.637	113.478	100.994	109.78	108.586	111.982	95.3816	99.7834	104.662	101.138	110.619	111.086	110.39	125.683	105.41	113.804	100.879	117.178	90.2014	84.5353	97.4668	73.9235	106.104	114.312	111.75	102.952	95.2411	97.3772	102.487	95.3569	89.5308	80.2143	96.5294	92.3734	92.3306	99.8801	97.9648	95.6027	99.3999	85.1173	98.5789	108.225	98.0508	89.5679	91.1775	95.5986	99.3676	112.284
	108.789	106.996	113.478	100.994	110.446	108.586	112.964	96.1699	100.644	105.58	101.967	111.333	111.086	109.413	126.594	102.959	113.025	101.674	119.782	91.0604	85.1391	96.5205	74.8035	106.104	115.516	111.75	101.972	95.2411	98.7487	103.175	94.4311	89.5308	81.2561	97.4231	93.1244	92.8936	100.569	97.9648	96.4413	99.3999	85.1173	97.7291	108.225	97.2787	90.3081	90.1048	95.5986	99.3676	113.228
	108.789	106.356	112.673	101.765	111.111	108.586	111.982	96.9582	100.644	106.498	101.967	112.047	110.183	109.413	125.683	104.184	113.025	102.468	121.084	90.2014	85.1391	96.5205	74.8035	107.01	114.312	113.05	100.991	97.2675	97.3772	103.175	95.3569	90.3675	83.3396	96.5294	93.1244	92.3306	100.569	97.3245	97.2799	99.3999	85.8981	97.7291	106.239	97.2787	90.3081	90.1048	95.5986	100.436	114.172
	108.034	106.356	113.478	101.765	111.111	107.71	110.999	98.5347	101.504	105.58	101.138	112.047	110.183	109.413	125.683	102.959	113.025	104.057	121.084	90.2014	84.5353	96.5205	76.5636	107.917	115.516	111.75	100.011	97.2675	98.7487	104.551	95.3569	90.3675	83.3396	96.5294	92.3734	92.3306	101.258	96.6842	97.2799	100.195	85.8981	96.8793	105.246	99.5949	90.3081	91.1775	96.5091	101.505	115.115
	108.789	106.356	113.478	102.536	111.111	106.834	111.982	99.323	101.504	104.662	100.309	110.619	110.183	109.413	124.772	104.184	112.245	104.851	118.48	90.2014	83.9315	97.4668	77.4436	108.824	116.719	111.75	99.0303	98.2807	98.7487	104.551	96.2827	91.2043	82.2978	96.5294	93.1244	91.7676	101.258	96.6842	98.1185	100.99	85.8981	96.0294	104.253	101.139	91.0484	91.1775	93.7777	102.573	114.172
	108.034	106.356	113.478	103.307	111.111	107.71	111.982	98.5347	102.364	104.662	99.4796	108.478	111.086	111.367	123.861	104.184	112.245	105.645	117.178	90.2014	83.9315	98.4131	77.4436	108.824	115.516	109.152	98.0498	100.307	100.12	104.551	98.1343	89.5308	80.2143	97.4231	93.1244	91.2046	101.258	96.6842	98.9571	101.785	86.679	95.1796	102.267	101.139	91.0484	93.3228	91.9568	104.71	114.172
	107.279	105.715	113.478	104.078	111.111	107.71	111.982	97.7465	102.364	104.662	99.4796	107.051	111.086	112.344	123.861	104.184	111.466	107.234	115.876	90.2014	83.3276	97.4668	78.3237	107.917	113.109	107.852	98.0498	101.32	101.492	103.863	98.1343	88.6941	78.1308	99.2107	93.1244	91.2046	101.258	96.6842	98.1185	102.581	88.2408	96.0294	101.275	100.367	91.0484	93.3228	91.0463	105.778	114.172
	105.012	106.356	113.478	105.62	111.111	108.586	111.982	96.9582	103.224	105.58	99.4796	106.337	110.183	115.275	122.951	101.733	111.466	108.028	117.178	90.2014	82.7238	96.5205	80.0838	107.917	111.906	107.852	98.0498	103.347	101.492	104.551	97.2085	87.0206	77.0891	99.2107	93.1244	90.6416	101.258	96.6842	98.1185	104.171	89.0217	96.0294	100.282	97.2787	91.7886	95.4682	91.0463	105.778	114.172
	105.012	106.996	113.478	106.391	110.446	109.461	110.999	96.9582	101.504	107.417	98.6506	107.051	109.28	117.228	121.129	101.733	111.466	108.028	119.782	89.3423	82.7238	95.5742	80.0838	107.917	111.906	106.553	98.0498	104.36	101.492	104.551	96.2827	86.1839	76.0473	100.105	93.1244	90.6416	101.258	97.3245	98.1185	103.376	89.8026	96.8793	99.2888	95.7346	92.5288	95.4682	91.0463	104.71	113.228
	104.257	106.996	112.673	106.391	109.78	110.337	110.999	96.9582	100.644	108.335	97.8216	107.765	109.28	119.182	121.129	101.733	110.686	108.028	122.386	87.6242	82.7238	94.628	80.0838	107.917	110.702	106.553	97.0693	105.373	101.492	105.238	96.2827	85.3471	76.0473	100.105	93.8754	91.2046	101.258	97.3245	98.1185	101.785	90.5835	97.7291	99.2888	94.1905	93.269	94.3955	91.9568	103.641	112.284
	104.257	108.278	113.478	106.391	108.45	111.213	110.999	96.9582	100.644	108.335	97.8216	107.765	109.28	120.159	121.129	102.959	110.686	108.028	124.99	88.4832	81.5162	93.6817	80.9638	107.917	111.906	105.253	97.0693	105.373	101.492	103.863	95.3569	84.5104	76.0473	100.105	94.6264	91.7676	99.8801	98.6051	97.2799	100.99	90.5835	98.5789	98.2959	94.9626	92.5288	92.2501	93.7777	102.573	112.284
	104.257	108.918	113.478	104.849	108.45	112.088	110.999	96.9582	100.644	109.253	97.8216	108.478	109.28	120.159	121.129	102.959	111.466	107.234	126.292	88.4832	82.12	94.628	80.9638	107.01	110.702	105.253	97.0693	104.36	102.863	103.863	95.3569	83.6736	77.0891	99.2107	93.8754	91.7676	99.1913	98.6051	97.2799	100.99	90.5835	99.4287	98.2959	95.7346	93.269	91.1775	95.5986	103.641	112.284
	104.257	109.559	113.478	104.849	109.115	112.088	111.982	96.1699	101.504	109.253	98.6506	109.192	109.28	120.159	122.951	104.184	111.466	106.44	126.292	90.2014	82.7238	94.628	82.7239	106.104	110.702	103.954	97.0693	104.36	104.235	103.175	95.3569	83.6736	78.1308	98.3169	95.3775	91.7676	98.5025	99.2454	97.2799	100.195	89.8026	100.279	98.2959	94.9626	93.269	91.1775	96.5091	103.641	111.341
	104.257	110.84	114.283	104.849	109.115	112.964	113.946	96.1699	102.364	108.335	99.4796	110.619	109.28	120.159	122.951	105.41	112.245	106.44	126.292	91.0604	84.5353	94.628	83.6039	105.197	110.702	105.253	97.0693	103.347	106.978	103.863	95.3569	82.0002	79.1726	97.4231	93.1244	92.3306	97.1248	99.8857	96.4413	100.99	90.5835	100.279	97.303	94.1905	94.0093	91.1775	97.4196	105.778	111.341
	102.746	110.84	113.478	104.078	109.115	112.964	113.946	96.1699	104.945	107.417	100.309	112.047	109.28	121.136	124.772	104.184	112.245	106.44	127.594	91.9195	86.3468	96.5205	82.7239	105.197	109.499	105.253	97.0693	103.347	105.606	103.863	96.2827	81.1634	79.1726	97.4231	92.3734	92.8936	95.0583	99.2454	95.6027	100.195	90.5835	100.279	97.303	94.9626	94.0093	93.3228	96.5091	107.915	111.341
	101.99	110.84	112.673	104.078	109.115	114.716	114.929	97.7465	104.945	106.498	101.138	112.76	108.377	121.136	125.683	104.184	112.245	107.234	127.594	91.9195	87.5544	97.4668	82.7239	104.29	109.499	105.253	97.0693	102.334	104.235	102.487	96.2827	80.3267	79.1726	96.5294	92.3734	94.0196	93.6807	100.526	95.6027	100.99	90.5835	100.279	97.303	95.7346	94.0093	93.3228	94.6882	110.052	109.454
	100.479	110.2	111.868	104.078	108.45	114.716	112.964	98.5347	105.805	105.58	101.138	112.76	108.377	121.136	124.772	105.41	110.686	108.028	128.896	92.7785	88.1582	97.4668	82.7239	104.29	109.499	106.553	97.0693	100.307	101.492	102.487	95.3569	80.3267	79.1726	96.5294	91.6224	94.5826	92.303	100.526	95.6027	100.195	90.5835	99.4287	97.303	97.2787	93.269	93.3228	93.7777	111.121	108.51
	98.9682	109.559	111.868	104.078	107.784	114.716	112.964	98.5347	104.945	105.58	101.138	112.047	108.377	120.159	124.772	104.184	109.907	108.823	130.198	92.7785	88.1582	96.5205	82.7239	104.29	108.296	107.852	97.0693	98.2807	98.7487	102.487	95.3569	80.3267	80.2143	96.5294	92.3734	95.1456	92.303	100.526	94.764	100.195	90.5835	97.7291	98.2959	98.8228	93.269	92.2501	92.8672	112.189	108.51
	100.479	108.918	111.868	103.307	107.784	113.84	110.999	98.5347	104.945	105.58	101.967	111.333	109.28	119.182	124.772	104.184	108.348	108.823	131.5	92.7785	88.1582	95.5742	82.7239	104.29	109.499	110.451	98.0498	96.2543	98.7487	101.799	95.3569	81.1634	80.2143	97.4231	90.8714	95.1456	92.9918	101.166	94.764	100.99	91.3644	96.8793	100.282	99.5949	92.5288	92.2501	91.0463	111.121	108.51
	101.235	108.278	111.868	104.078	107.784	113.84	110.017	99.323	105.805	105.58	101.967	109.906	110.183	120.159	124.772	104.184	108.348	108.028	134.104	91.0604	87.5544	93.6817	82.7239	104.29	108.296	111.75	97.0693	95.2411	96.0057	101.111	95.3569	80.3267	81.2561	98.3169	90.1204	95.1456	94.3695	100.526	94.764	100.195	91.3644	96.0294	101.275	98.8228	92.5288	91.1775	91.0463	110.052	108.51
	101.99	107.637	111.868	104.849	107.784	113.84	109.035	100.111	105.805	106.498	101.967	109.192	111.086	119.182	123.861	105.41	109.127	107.234	136.708	90.2014	86.9506	93.6817	82.7239	104.29	109.499	111.75	97.0693	94.2279	94.6342	100.424	96.2827	81.1634	82.2978	98.3169	91.6224	95.1456	95.7472	100.526	94.764	100.195	91.3644	95.1796	103.26	98.8228	92.5288	90.1048	88.3149	107.915	108.51
	102.746	106.996	111.868	104.849	108.45	112.088	109.035	101.688	105.805	107.417	101.967	109.192	111.086	120.159	122.951	105.41	109.907	105.645	136.708	89.3423	85.7429	93.6817	81.8438	103.383	108.296	114.349	98.0498	94.2279	93.2627	100.424	97.2085	80.3267	84.3813	100.105	92.3734	95.1456	96.436	100.526	95.6027	100.99	92.1453	94.3298	104.253	98.0508	93.269	90.1048	87.4045	106.847	108.51
	103.501	106.996	111.868	104.849	108.45	111.213	110.017	101.688	106.665	106.498	101.138	109.192	111.086	118.205	122.04	107.861	109.907	104.851	135.406	91.0604	84.5353	92.7354	80.9638	104.29	108.296	113.05	98.0498	93.2147	91.8912	99.7358	97.2085	79.49	84.3813	100.998	93.8754	95.1456	96.436	101.166	95.6027	100.99	92.9262	93.48	105.246	97.2787	93.269	93.3228	86.494	106.847	108.51
	103.501	106.356	111.063	105.62	108.45	111.213	110.999	101.688	106.665	106.498	101.138	109.192	111.989	118.205	120.218	110.313	109.907	105.645	134.104	91.9195	82.7238	93.6817	80.0838	104.29	109.499	115.649	98.0498	93.2147	90.5197	100.424	97.2085	79.49	85.423	101.892	94.6264	95.1456	97.1248	101.807	95.6027	102.581	92.9262	92.6302	106.239	96.5067	93.269	95.4682	86.494	106.847	108.51
	104.257	106.356	111.868	107.162	108.45	110.337	111.982	100.9	106.665	106.498	101.967	110.619	111.989	117.228	119.308	111.539	109.907	104.851	130.198	92.7785	81.5162	92.7354	80.0838	104.29	110.702	116.948	98.0498	93.2147	91.8912	99.7358	96.2827	80.3267	86.4648	101.892	96.1285	94.5826	98.5025	101.166	96.4413	103.376	92.1453	91.7804	105.246	94.9626	93.269	95.4682	86.494	107.915	109.454
	105.768	105.715	111.063	107.933	107.784	111.213	111.982	100.9	106.665	106.498	101.138	111.333	111.989	116.251	118.397	112.764	109.127	104.057	127.594	93.6376	82.12	91.7891	80.0838	105.197	113.109	120.846	97.0693	94.2279	91.8912	99.7358	96.2827	81.1634	84.3813	100.998	96.1285	94.0196	99.1913	100.526	97.2799	103.376	91.3644	90.9305	105.246	94.1905	92.5288	95.4682	85.5835	107.915	109.454
	106.523	105.074	110.259	107.933	106.454	112.964	110.999	101.688	105.805	106.498	101.138	111.333	111.989	116.251	117.486	113.99	109.127	104.057	124.99	94.4967	82.7238	90.8428	79.2037	105.197	114.312	120.846	97.0693	94.2279	94.6342	99.7358	97.2085	82.8369	83.3396	100.998	94.6264	93.4566	98.5025	100.526	98.1185	102.581	89.8026	90.9305	105.246	91.8744	91.7886	92.2501	85.5835	107.915	109.454
	108.034	105.074	110.259	107.933	105.788	112.964	110.017	101.688	104.945	106.498	101.138	111.333	111.989	115.275	116.575	115.216	108.348	103.262	123.688	92.7785	84.5353	90.8428	78.3237	104.29	115.516	120.846	96.0888	95.2411	94.6342	99.7358	97.2085	84.5104	81.2561	101.892	94.6264	92.8936	98.5025	100.526	98.9571	101.785	89.0217	91.7804	106.239	90.3302	91.0484	90.1048	85.5835	107.915	109.454
	107.279	103.793	110.259	107.162	105.123	112.088	108.053	100.9	104.945	106.498	101.138	112.047	111.989	113.321	116.575	113.99	109.907	101.674	122.386	92.7785	85.7429	89.8966	78.3237	104.29	117.922	116.948	96.0888	95.2411	93.2627	99.0479	98.1343	85.3471	79.1726	101.892	93.8754	92.3306	98.5025	101.166	98.9571	102.581	88.2408	92.6302	107.232	90.3302	90.3081	89.0321	85.5835	108.984	109.454
	105.768	103.793	110.259	107.162	103.792	110.337	108.053	100.111	104.945	106.498	101.138	112.047	111.989	111.367	116.575	112.764	110.686	101.674	121.084	91.9195	86.9506	89.8966	79.2037	103.383	119.125	115.649	95.1083	96.2543	93.2627	99.7358	98.1343	85.3471	78.1308	100.998	94.6264	92.3306	97.8136	101.166	98.1185	100.99	88.2408	92.6302	108.225	92.6464	90.3081	86.8868	85.5835	110.052	108.51
	106.523	102.511	109.454	107.162	103.792	109.461	108.053	100.111	103.224	106.498	101.138	112.047	111.086	111.367	115.665	112.764	111.466	101.674	121.084	91.9195	87.5544	89.8966	79.2037	103.383	122.735	113.05	95.1083	97.2675	94.6342	100.424	99.0601	85.3471	78.1308	100.998	94.6264	92.8936	96.436	101.807	98.1185	100.99	87.4599	93.48	108.225	93.4185	90.3081	85.8141	84.6731	111.121	109.454
	105.012	103.152	110.259	107.933	103.792	108.586	109.035	100.111	103.224	106.498	101.138	112.047	111.086	110.39	114.754	111.539	113.804	102.468	124.99	91.9195	87.5544	89.8966	79.2037	103.383	123.939	111.75	96.0888	97.2675	93.2627	100.424	99.0601	84.5104	79.1726	100.998	94.6264	92.8936	96.436	102.447	98.9571	101.785	86.679	95.1796	108.225	94.1905	90.3081	85.8141	83.7626	112.189	109.454
	104.257	102.511	111.063	107.162	104.458	108.586	109.035	100.111	102.364	106.498	100.309	112.047	110.183	111.367	114.754	110.313	113.804	103.262	127.594	91.9195	87.5544	89.8966	80.0838	103.383	125.142	111.75	96.0888	96.2543	94.6342	99.7358	99.0601	82.8369	81.2561	101.892	94.6264	92.8936	97.1248	103.087	98.9571	102.581	85.8981	96.0294	108.225	94.9626	90.3081	87.9594	84.6731	112.189	110.397
	104.257	101.871	111.868	107.162	105.788	108.586	110.017	100.111	101.504	104.662	100.309	111.333	110.183	110.39	116.575	109.087	114.583	104.851	127.594	91.0604	87.5544	90.8428	80.0838	103.383	126.345	111.75	96.0888	95.2411	94.6342	99.7358	99.0601	82.8369	82.2978	101.892	94.6264	92.3306	97.8136	103.087	98.1185	103.376	86.679	96.0294	108.225	95.7346	91.0484	90.1048	84.6731	113.258	111.341
	104.257	102.511	111.868	107.162	106.454	110.337	110.017	100.111	100.644	103.744	99.4796	111.333	109.28	109.413	115.665	109.087	114.583	105.645	127.594	91.0604	87.5544	91.7891	80.0838	103.383	126.345	110.451	96.0888	95.2411	96.0057	99.0479	99.0601	83.6736	84.3813	100.998	94.6264	91.2046	97.8136	103.727	97.2799	103.376	88.2408	96.8793	109.218	97.2787	91.7886	92.2501	86.494	113.258	111.341
	105.012	102.511	111.868	107.933	107.784	112.088	110.017	100.9	99.7834	102.826	99.4796	109.906	108.377	109.413	117.486	109.087	114.583	107.234	126.292	90.2014	87.5544	91.7891	80.0838	103.383	127.548	109.152	97.0693	96.2543	94.6342	99.7358	99.0601	84.5104	85.423	100.998	94.6264	91.2046	97.1248	105.008	95.6027	102.581	90.5835	96.8793	109.218	98.8228	91.7886	92.2501	87.4045	114.326	111.341
	104.257	101.871	111.868	107.162	107.784	112.088	110.999	101.688	99.7834	102.826	99.4796	107.765	109.28	108.436	117.486	106.636	113.804	105.645	123.688	90.2014	88.1582	91.7891	80.0838	103.383	123.939	107.852	98.0498	96.2543	94.6342	99.0479	99.9858	85.3471	85.423	100.105	94.6264	91.2046	97.8136	105.648	94.764	103.376	91.3644	96.0294	108.225	99.5949	91.7886	93.3228	88.3149	114.326	112.284
	105.012	101.871	111.063	107.162	108.45	111.213	110.999	101.688	100.644	101.908	99.4796	106.337	110.183	109.413	116.575	104.184	113.025	104.851	122.386	91.0604	88.762	91.7891	79.2037	103.383	120.329	109.152	97.0693	96.2543	93.2627	99.7358	99.9858	85.3471	85.423	100.105	93.8754	91.7676	98.5025	106.289	95.6027	101.785	92.1453	95.1796	107.232	98.0508	91.7886	94.3955	89.2254	115.395	111.341
	104.257	101.871	109.454	107.162	107.784	112.088	110.999	102.476	100.644	101.908	100.309	104.91	110.183	109.413	114.754	104.184	112.245	104.851	122.386	91.9195	88.1582	91.7891	79.2037	103.383	116.719	109.152	97.0693	98.2807	93.2627	100.424	98.1343	84.5104	84.3813	100.105	93.1244	92.8936	99.1913	106.929	95.6027	102.581	92.1453	95.1796	106.239	98.0508	91.0484	95.4682	90.1359	115.395	111.341
	105.012	101.871	109.454	106.391	107.784	110.337	110.999	104.053	101.504	102.826	101.138	104.196	111.086	110.39	113.843	104.184	111.466	104.851	121.084	91.0604	88.1582	91.7891	77.4436	103.383	115.516	110.451	97.0693	99.294	93.2627	101.799	98.1343	83.6736	84.3813	99.2107	93.1244	93.4566	99.1913	106.929	97.2799	101.785	91.3644	95.1796	105.246	97.2787	91.0484	96.5408	90.1359	115.395	110.397
	105.012	101.23	109.454	107.162	108.45	110.337	110.999	104.841	102.364	102.826	100.309	104.196	111.989	112.344	113.843	105.41	112.245	104.057	119.782	91.0604	88.1582	91.7891	76.5636	104.29	113.109	109.152	96.0888	98.2807	94.6342	102.487	97.2085	84.5104	83.3396	98.3169	93.1244	93.4566	99.8801	107.569	98.1185	101.785	90.5835	95.1796	105.246	94.9626	91.0484	95.4682	89.2254	114.326	110.397
	105.768	101.871	109.454	107.162	109.115	109.461	111.982	105.629	103.224	101.908	100.309	105.624	111.989	113.321	113.843	106.636	112.245	104.851	118.48	90.2014	87.5544	92.7354	77.4436	104.29	111.906	110.451	96.0888	97.2675	96.0057	103.175	97.2085	85.3471	83.3396	97.4231	92.3734	92.8936	100.569	108.209	100.634	102.581	91.3644	95.1796	105.246	94.1905	90.3081	95.4682	88.3149	114.326	110.397
	105.012	101.23	110.259	107.933	110.446	109.461	111.982	106.418	104.084	100.072	100.309	105.624	111.086	115.275	114.754	109.087	111.466	106.44	117.178	91.0604	86.9506	92.7354	78.3237	103.383	110.702	109.152	96.0888	97.2675	97.3772	103.175	96.2827	87.8573	82.2978	98.3169	92.3734	92.8936	100.569	108.209	101.473	101.785	91.3644	95.1796	105.246	93.4185	90.3081	96.5408	88.3149	114.326	110.397
	105.768	99.9486	110.259	107.933	110.446	110.337	111.982	107.206	104.945	99.1537	101.138	104.91	110.183	116.251	115.665	110.313	111.466	106.44	117.178	91.9195	86.9506	92.7354	78.3237	103.383	110.702	109.152	96.0888	96.2543	97.3772	103.863	96.2827	87.8573	81.2561	98.3169	93.1244	92.8936	100.569	108.85	103.15	102.581	92.1453	96.0294	106.239	93.4185	91.0484	95.4682	88.3149	114.326	111.341
	105.768	100.589	109.454	107.933	110.446	109.461	110.999	107.206	106.665	98.2356	101.967	104.196	109.28	115.275	115.665	111.539	113.025	107.234	115.876	94.4967	86.9506	91.7891	80.0838	103.383	111.906	109.152	95.1083	94.2279	97.3772	103.863	96.2827	87.8573	81.2561	99.2107	93.8754	92.3306	100.569	109.49	102.312	102.581	92.9262	96.0294	106.239	92.6464	91.7886	94.3955	85.5835	115.395	113.228
	105.768	101.23	111.063	108.704	110.446	110.337	109.035	106.418	110.106	97.3176	101.967	103.483	109.28	114.298	114.754	111.539	113.025	106.44	115.876	94.4967	87.5544	91.7891	81.8438	103.383	110.702	107.852	96.0888	92.2015	97.3772	103.863	97.2085	87.0206	81.2561	100.105	94.6264	92.3306	101.258	108.209	102.312	100.195	94.488	96.0294	106.239	91.8744	93.269	93.3228	85.5835	115.395	115.115
	105.768	101.23	110.259	109.475	110.446	110.337	108.053	106.418	111.826	97.3176	101.967	103.483	109.28	114.298	113.843	111.539	113.804	104.851	115.876	95.3557	88.1582	91.7891	82.7239	103.383	110.702	107.852	95.1083	92.2015	97.3772	103.863	97.2085	85.3471	82.2978	100.998	94.6264	91.7676	101.947	107.569	103.15	98.6047	94.488	96.0294	106.239	91.1023	94.0093	93.3228	83.7626	115.395	117.002
	105.012	100.589	111.063	109.475	110.446	112.088	108.053	106.418	110.966	98.2356	101.967	102.055	108.377	113.321	113.843	110.313	113.025	104.057	114.574	95.3557	88.762	91.7891	83.6039	104.29	109.499	105.253	95.1083	92.2015	97.3772	103.863	98.1343	86.1839	83.3396	100.998	96.1285	91.2046	103.324	106.289	103.989	97.0143	94.488	96.0294	105.246	90.3302	94.0093	92.2501	82.8521	115.395	118.889
	105.012	100.589	111.868	108.704	109.115	112.088	108.053	105.629	110.106	99.1537	101.967	102.055	109.28	113.321	114.754	109.087	113.025	104.057	113.272	94.4967	89.3659	91.7891	83.6039	105.197	108.296	105.253	95.1083	91.1883	96.0057	103.863	98.1343	87.0206	82.2978	100.105	96.1285	90.6416	102.635	105.008	103.15	96.2191	95.2688	96.0294	104.253	91.1023	94.7495	93.3228	82.8521	115.395	117.946
	104.257	101.23	111.868	108.704	109.115	111.213	109.035	104.841	108.385	100.99	101.967	101.342	109.28	114.298	114.754	106.636	113.025	104.851	111.97	94.4967	89.3659	91.7891	83.6039	105.197	109.499	103.954	96.0888	91.1883	94.6342	103.175	98.1343	87.0206	81.2561	99.2107	95.3775	90.0787	101.947	104.368	102.312	97.0143	96.8306	96.0294	102.267	91.8744	94.7495	92.2501	81.9417	114.326	117.002
	102.746	101.871	111.063	108.704	109.78	110.337	111.982	104.053	107.525	101.908	101.967	101.342	108.377	114.298	114.754	105.41	113.804	105.645	111.97	94.4967	88.762	91.7891	83.6039	105.197	109.499	102.654	98.0498	92.2015	94.6342	103.863	98.1343	87.8573	81.2561	99.2107	95.3775	90.0787	101.258	103.087	101.473	97.0143	97.6115	95.1796	101.275	92.6464	94.7495	91.1775	81.9417	113.258	115.115
	101.99	102.511	111.868	107.933	110.446	108.586	112.964	102.476	106.665	102.826	101.138	101.342	108.377	114.298	113.843	105.41	114.583	106.44	113.272	93.6376	88.1582	91.7891	82.7239	106.104	108.296	103.954	100.991	92.2015	94.6342	102.487	98.1343	88.6941	81.2561	98.3169	95.3775	89.5157	101.947	103.087	101.473	97.0143	97.6115	94.3298	101.275	93.4185	94.7495	91.1775	81.9417	113.258	114.172
	101.235	103.152	110.259	107.162	110.446	109.461	114.929	102.476	104.945	102.826	101.138	101.342	107.474	114.298	113.843	106.636	115.363	105.645	113.272	93.6376	88.1582	91.7891	81.8438	107.01	108.296	103.954	102.952	91.1883	93.2627	102.487	99.0601	88.6941	79.1726	96.5294	95.3775	88.9527	102.635	103.087	101.473	98.6047	96.8306	93.48	102.267	93.4185	94.7495	92.2501	81.9417	112.189	114.172
	100.479	103.152	110.259	107.162	111.777	111.213	116.893	101.688	103.224	101.908	101.138	101.342	107.474	113.321	113.843	106.636	115.363	106.44	113.272	94.4967	87.5544	91.7891	80.9638	107.917	109.499	103.954	103.933	91.1883	94.6342	102.487	101.837	87.8573	78.1308	96.5294	95.3775	88.3897	102.635	104.368	101.473	98.6047	97.6115	92.6302	104.253	91.1023	94.7495	92.2501	81.9417	111.121	116.059
	101.99	103.152	108.649	107.162	112.442	111.213	115.911	100.9	104.084	100.99	100.309	101.342	108.377	112.344	113.843	106.636	116.142	104.851	114.574	94.4967	88.1582	91.7891	80.0838	107.917	108.296	103.954	102.952	91.1883	96.0057	103.175	99.9858	87.0206	79.1726	96.5294	95.3775	87.2637	103.324	105.008	101.473	97.8095	98.3924	92.6302	106.239	90.3302	94.7495	92.2501	82.8521	110.052	117.946
	101.99	103.793	107.844	108.704	111.777	112.088	115.911	100.9	104.084	100.99	100.309	100.628	109.28	112.344	113.843	107.861	116.142	104.057	117.178	94.4967	88.762	90.8428	80.0838	107.917	108.296	102.654	100.991	91.1883	94.6342	103.863	99.9858	84.5104	79.1726	96.5294	95.3775	87.2637	103.324	105.648	100.634	97.0143	98.3924	92.6302	107.232	90.3302	94.7495	92.2501	82.8521	107.915	119.833
	102.746	103.793	107.844	110.246	112.442	112.964	115.911	100.9	104.084	100.072	100.309	100.628	109.28	111.367	114.754	107.861	116.142	104.057	119.782	94.4967	88.1582	89.8966	80.0838	107.917	109.499	102.654	99.0303	90.1751	94.6342	104.551	99.9858	82.8369	80.2143	95.6356	95.3775	87.2637	104.013	106.289	100.634	96.2191	97.6115	93.48	108.225	90.3302	94.7495	92.2501	81.9417	105.778	120.776
	102.746	104.433	107.844	110.246	111.777	112.964	115.911	100.9	104.945	100.072	101.138	100.628	110.183	109.413	115.665	110.313	116.142	104.057	122.386	92.7785	88.1582	88.9503	81.8438	107.917	109.499	102.654	97.0693	90.1751	96.0057	103.863	99.0601	82.8369	81.2561	94.7418	93.8754	88.3897	104.013	106.289	100.634	96.2191	96.0497	93.48	109.218	91.1023	94.7495	91.1775	81.0312	103.641	121.72
	102.746	103.793	109.454	110.246	111.777	112.964	116.893	101.688	104.945	100.072	101.138	100.628	110.183	108.436	116.575	113.99	114.583	104.057	122.386	92.7785	88.762	88.9503	82.7239	107.917	109.499	103.954	97.0693	90.1751	94.6342	104.551	99.9858	83.6736	83.3396	93.848	95.3775	89.5157	104.702	105.008	100.634	96.2191	93.7071	94.3298	110.211	91.8744	95.4897	89.0321	81.0312	102.573	123.607
	103.501	103.793	110.259	109.475	112.442	112.964	116.893	103.264	104.945	99.1537	101.967	99.9142	110.183	108.436	117.486	113.99	113.804	104.057	123.688	91.9195	89.3659	88.004	83.6039	107.917	108.296	102.654	97.0693	90.1751	96.0057	103.863	100.912	83.6736	84.3813	92.9542	94.6264	91.2046	104.013	104.368	99.7958	96.2191	92.9262	94.3298	111.203	92.6464	95.4897	87.9594	80.1208	101.505	125.494
	103.501	103.152	111.868	107.933	111.777	112.964	116.893	103.264	104.945	99.1537	101.967	99.9142	110.183	108.436	119.308	115.216	113.025	103.262	124.99	92.7785	88.762	88.004	84.484	107.01	108.296	103.954	97.0693	91.1883	96.0057	103.863	101.837	86.1839	85.423	92.9542	95.3775	91.7676	104.013	103.087	98.1185	97.0143	92.1453	95.1796	112.196	94.1905	95.4897	86.8868	79.2103	101.505	127.381
	104.257	102.511	111.868	107.162	112.442	110.337	115.911	104.841	105.805	99.1537	101.138	99.2006	110.183	109.413	118.397	115.216	113.025	101.674	126.292	92.7785	88.762	88.9503	84.484	106.104	107.093	102.654	97.0693	91.1883	97.3772	103.863	101.837	86.1839	84.3813	92.9542	94.6264	92.3306	103.324	102.447	98.1185	96.2191	92.9262	95.1796	112.196	94.9626	94.7495	86.8868	78.2998	102.573	126.438
	104.257	102.511	111.063	106.391	113.107	110.337	114.929	104.053	105.805	98.2356	101.138	99.2006	110.183	111.367	118.397	115.216	113.025	100.085	128.896	91.9195	88.762	88.9503	85.364	105.197	107.093	102.654	97.0693	91.1883	97.3772	103.863	101.837	85.3471	84.3813	92.9542	93.8754	92.8936	103.324	101.807	97.2799	95.4239	93.7071	95.1796	110.211	95.7346	94.7495	85.8141	78.2998	103.641	124.551
	104.257	103.793	110.259	105.62	113.773	110.337	113.946	103.264	106.665	97.3176	99.4796	99.9142	111.086	112.344	117.486	117.667	114.583	100.085	130.198	91.9195	88.762	89.8966	85.364	105.197	105.889	103.954	97.0693	91.1883	96.0057	103.863	100.912	85.3471	82.2978	94.7418	94.6264	93.4566	102.635	101.807	96.4413	93.8335	93.7071	95.1796	109.218	98.0508	94.0093	85.8141	77.3894	104.71	123.607
	104.257	104.433	111.063	105.62	114.438	111.213	112.964	101.688	109.246	98.2356	97.8216	102.055	109.28	113.321	116.575	118.893	113.804	100.879	131.5	91.9195	88.1582	89.8966	86.244	105.197	105.889	106.553	97.0693	92.2015	96.0057	103.863	100.912	84.5104	81.2561	95.6356	94.6264	92.8936	101.947	101.166	95.6027	93.0383	93.7071	95.1796	109.218	99.5949	93.269	84.7414	77.3894	104.71	122.664
	104.257	105.715	111.063	105.62	114.438	111.213	111.982	101.688	110.966	99.1537	97.8216	102.769	108.377	113.321	116.575	118.893	113.804	100.085	132.802	91.9195	88.762	89.8966	86.244	105.197	104.686	109.152	97.0693	93.2147	96.0057	103.863	100.912	83.6736	79.1726	96.5294	93.8754	92.3306	101.258	101.807	94.764	93.8335	94.488	94.3298	109.218	101.139	93.269	84.7414	78.2998	103.641	121.72
	103.501	105.074	111.868	105.62	113.773	112.088	111.982	101.688	110.106	99.1537	98.6506	103.483	109.28	113.321	115.665	120.118	113.804	99.2908	132.802	91.9195	89.3659	90.8428	86.244	104.29	104.686	110.451	97.0693	94.2279	96.0057	104.551	100.912	83.6736	79.1726	96.5294	93.1244	92.3306	101.258	102.447	93.9254	94.6287	92.9262	94.3298	109.218	103.455	93.269	85.8141	80.1208	101.505	119.833
	101.99	105.074	112.673	105.62	112.442	110.337	111.982	101.688	110.966	99.1537	97.8216	103.483	109.28	112.344	114.754	120.118	114.583	99.2908	132.802	91.9195	89.3659	91.7891	88.0041	104.29	103.483	111.75	97.0693	94.2279	96.0057	105.926	100.912	84.5104	79.1726	96.5294	93.8754	92.3306	101.258	103.087	93.9254	94.6287	91.3644	94.3298	110.211	104.999	93.269	85.8141	81.9417	100.436	118.889
	101.99	104.433	113.478	105.62	111.777	108.586	111.982	102.476	110.106	99.1537	97.8216	102.769	108.377	111.367	114.754	118.893	115.363	100.085	132.802	91.9195	89.9697	92.7354	88.8842	103.383	103.483	113.05	98.0498	94.2279	96.0057	105.238	100.912	84.5104	79.1726	95.6356	93.8754	92.3306	101.258	103.727	93.9254	94.6287	89.8026	94.3298	111.203	105.771	93.269	86.8868	84.6731	99.3676	118.889
	101.99	104.433	113.478	105.62	111.111	106.834	111.982	102.476	108.385	100.072	99.4796	102.769	107.474	111.367	115.665	118.893	116.142	100.085	132.802	92.7785	89.9697	91.7891	91.5243	102.476	104.686	114.349	99.0303	95.2411	96.0057	105.926	101.837	85.3471	79.1726	95.6356	94.6264	92.3306	101.947	104.368	94.764	94.6287	89.0217	94.3298	112.196	106.543	93.269	85.8141	87.4045	98.2992	118.889
	100.479	105.074	114.283	104.849	111.777	108.586	112.964	103.264	106.665	101.908	99.4796	103.483	107.474	112.344	115.665	117.667	115.363	100.085	131.5	94.4967	90.5735	90.8428	94.1644	102.476	107.093	114.349	100.011	95.2411	96.0057	105.926	100.912	84.5104	78.1308	95.6356	95.3775	92.3306	101.947	105.648	96.4413	95.4239	89.0217	94.3298	112.196	106.543	93.269	86.8868	88.3149	97.2307	119.833
	100.479	104.433	113.478	104.849	110.446	109.461	112.964	104.841	104.945	101.908	100.309	104.196	108.377	112.344	116.575	116.441	114.583	99.2908	128.896	94.4967	90.5735	90.8428	95.9245	102.476	107.093	114.349	100.011	95.2411	97.3772	105.926	100.912	83.6736	78.1308	95.6356	94.6264	91.7676	101.947	105.648	96.4413	93.8335	89.0217	93.48	111.203	107.315	93.269	86.8868	89.2254	96.1622	120.776
	100.479	104.433	111.063	104.078	109.78	110.337	111.982	105.629	104.084	101.908	101.138	106.337	108.377	113.321	117.486	113.99	114.583	99.2908	127.594	94.4967	91.1773	90.8428	97.6846	102.476	107.093	116.948	101.972	96.2543	96.0057	105.926	99.9858	84.5104	78.1308	94.7418	95.3775	91.7676	102.635	105.648	97.2799	93.8335	89.8026	93.48	111.203	106.543	94.0093	87.9594	90.1359	96.1622	121.72
	101.235	104.433	109.454	103.307	109.78	110.337	110.999	104.841	103.224	102.826	101.138	107.765	107.474	112.344	116.575	112.764	115.363	99.2908	124.99	94.4967	89.9697	90.8428	99.4447	103.383	107.093	116.948	100.991	96.2543	96.0057	105.926	99.0601	84.5104	79.1726	93.848	94.6264	91.7676	103.324	105.008	98.1185	94.6287	91.3644	93.48	111.203	104.227	94.0093	89.0321	91.0463	97.2307	119.833
	102.746	104.433	109.454	103.307	109.115	111.213	110.999	104.841	102.364	102.826	101.967	108.478	107.474	110.39	115.665	111.539	115.363	99.2908	123.688	93.6376	89.3659	91.7891	100.325	104.29	107.093	116.948	100.991	98.2807	94.6342	105.926	98.1343	85.3471	80.2143	93.848	94.6264	91.2046	104.702	103.727	98.1185	95.4239	92.1453	93.48	110.211	102.683	94.0093	91.1775	91.9568	98.2992	118.889
	101.99	104.433	109.454	104.078	108.45	110.337	111.982	104.841	100.644	103.744	101.138	109.906	107.474	109.413	114.754	111.539	115.363	100.085	122.386	93.6376	88.762	92.7354	99.4447	104.29	107.093	116.948	100.991	100.307	94.6342	105.238	99.0601	85.3471	81.2561	93.848	94.6264	90.0787	104.702	104.368	97.2799	97.0143	92.1453	93.48	110.211	101.139	94.0093	92.2501	92.8672	98.2992	118.889
	101.99	105.074	107.844	104.849	108.45	109.461	114.929	104.841	98.9232	102.826	100.309	110.619	107.474	109.413	115.665	110.313	114.583	101.674	119.782	93.6376	88.762	93.6817	98.5646	103.383	108.296	116.948	99.0303	102.334	94.6342	103.175	100.912	86.1839	83.3396	93.848	93.1244	90.0787	105.391	103.727	97.2799	97.8095	92.1453	93.48	110.211	98.8228	94.0093	93.3228	94.6882	99.3676	118.889
	101.99	105.715	109.454	105.62	107.784	108.586	116.893	105.629	98.9232	100.99	100.309	110.619	107.474	110.39	114.754	109.087	113.804	102.468	117.178	95.3557	88.1582	92.7354	98.5646	102.476	109.499	118.247	98.0498	102.334	94.6342	102.487	99.9858	86.1839	85.423	93.848	93.1244	90.0787	106.08	103.087	96.4413	99.3999	92.1453	93.48	110.211	98.0508	93.269	95.4682	97.4196	100.436	120.776
	100.479	105.715	107.039	106.391	107.119	109.461	117.876	106.418	99.7834	99.1537	99.4796	110.619	107.474	111.367	113.843	109.087	113.025	103.262	114.574	95.3557	88.1582	91.7891	97.6846	102.476	110.702	119.547	98.0498	103.347	94.6342	102.487	99.0601	87.0206	86.4648	94.7418	92.3734	90.0787	105.391	102.447	95.6027	100.195	92.1453	93.48	110.211	98.0508	93.269	97.6135	96.5091	101.505	121.72
	101.235	105.074	107.844	107.933	107.784	108.586	117.876	105.629	100.644	98.2356	99.4796	110.619	107.474	111.367	113.843	110.313	113.804	103.262	113.272	96.2148	88.1582	91.7891	96.8045	102.476	110.702	120.846	97.0693	103.347	94.6342	101.799	99.9858	87.8573	85.423	93.848	93.1244	90.0787	105.391	102.447	95.6027	99.3999	93.7071	95.1796	110.211	98.8228	93.269	97.6135	96.5091	100.436	122.664
	101.99	104.433	107.039	108.704	108.45	108.586	115.911	104.841	102.364	99.1537	100.309	111.333	108.377	112.344	113.843	111.539	114.583	103.262	113.272	97.0738	88.1582	90.8428	96.8045	102.476	111.906	120.846	96.0888	101.32	94.6342	102.487	99.9858	87.8573	84.3813	94.7418	93.8754	89.5157	105.391	102.447	95.6027	99.3999	94.488	95.1796	110.211	99.5949	94.0093	98.6862	96.5091	100.436	122.664
	103.501	103.793	107.039	107.933	108.45	108.586	113.946	104.053	104.084	100.072	100.309	111.333	109.28	112.344	112.022	111.539	113.804	102.468	114.574	97.0738	88.1582	90.8428	95.9245	103.383	113.109	122.146	96.0888	100.307	96.0057	102.487	99.9858	88.6941	82.2978	94.7418	93.8754	88.9527	105.391	103.727	94.764	99.3999	93.7071	96.0294	109.218	101.139	94.7495	99.7589	97.4196	100.436	122.664
	103.501	103.793	106.235	107.933	109.115	108.586	112.964	103.264	104.945	100.99	101.138	111.333	109.28	114.298	111.111	111.539	113.804	101.674	114.574	97.0738	88.1582	90.8428	96.8045	104.29	113.109	123.445	97.0693	100.307	97.3772	102.487	99.9858	87.8573	81.2561	94.7418	93.8754	87.8267	104.702	103.727	94.764	99.3999	94.488	97.7291	109.218	101.911	95.4897	100.832	97.4196	102.573	122.664
	101.99	104.433	106.235	107.933	109.115	108.586	111.982	103.264	104.945	100.072	101.138	110.619	111.086	116.251	109.289	110.313	113.025	100.879	117.178	98.792	88.1582	90.8428	95.9245	105.197	111.906	123.445	99.0303	100.307	98.7487	102.487	100.912	88.6941	81.2561	93.848	93.8754	87.8267	104.013	104.368	95.6027	99.3999	94.488	98.5789	110.211	101.911	95.4897	102.977	96.5091	102.573	122.664
	101.99	105.074	107.039	107.933	108.45	106.834	111.982	104.053	105.805	100.072	101.138	111.333	111.989	116.251	109.289	109.087	112.245	100.879	117.178	99.651	87.5544	90.8428	95.9245	105.197	110.702	122.146	100.991	100.307	98.7487	102.487	100.912	88.6941	81.2561	94.7418	94.6264	87.8267	103.324	103.727	98.1185	97.8095	95.2688	100.279	111.203	102.683	96.23	104.05	94.6882	103.641	121.72
	99.7237	105.074	108.649	107.162	109.115	106.834	111.982	104.841	104.945	100.072	101.967	112.047	112.893	116.251	109.289	106.636	113.025	101.674	117.178	97.9329	87.5544	89.8966	95.9245	104.29	111.906	119.547	101.972	100.307	100.12	103.175	99.0601	88.6941	81.2561	95.6356	93.1244	87.8267	102.635	103.087	98.9571	97.0143	95.2688	101.128	112.196	101.139	96.23	105.122	93.7777	104.71	122.664
	98.2127	103.793	107.844	107.162	109.115	107.71	110.999	104.841	104.084	100.99	101.967	113.474	111.989	116.251	108.379	104.184	113.804	102.468	117.178	96.2148	87.5544	89.8966	95.9245	103.383	110.702	119.547	102.952	99.294	98.7487	103.863	99.0601	90.3675	81.2561	94.7418	92.3734	87.8267	101.947	101.807	99.7958	94.6287	95.2688	100.279	111.203	101.139	96.9702	106.195	91.9568	104.71	121.72
	98.2127	104.433	108.649	106.391	108.45	109.461	110.999	104.053	101.504	100.072	101.967	114.901	110.183	117.228	108.379	101.733	113.804	103.262	118.48	94.4967	88.1582	90.8428	96.8045	102.476	110.702	116.948	102.952	100.307	98.7487	103.863	100.912	92.041	81.2561	94.7418	93.1244	87.8267	101.947	100.526	99.7958	94.6287	96.0497	100.279	110.211	101.911	96.9702	105.122	90.1359	105.778	120.776
	98.9682	103.152	107.844	104.849	107.119	111.213	110.999	104.053	101.504	99.1537	101.967	116.329	109.28	118.205	107.468	100.507	114.583	103.262	118.48	93.6376	88.1582	91.7891	96.8045	101.569	109.499	116.948	102.952	100.307	98.7487	104.551	101.837	92.041	80.2143	95.6356	92.3734	87.8267	101.947	99.8857	98.9571	93.8335	97.6115	101.128	109.218	104.227	96.9702	105.122	87.4045	105.778	119.833
	101.235	102.511	107.039	104.078	105.788	112.088	111.982	104.053	100.644	98.2356	101.138	117.756	109.28	117.228	108.379	99.2816	116.142	102.468	119.782	92.7785	88.1582	93.6817	97.6846	100.662	110.702	115.649	100.991	100.307	100.12	104.551	101.837	92.8777	80.2143	95.6356	92.3734	88.3897	102.635	99.8857	98.9571	93.8335	98.3924	101.128	109.218	104.227	97.7104	102.977	87.4045	105.778	117.946
	102.746	102.511	105.43	104.078	105.788	112.964	111.982	104.053	101.504	97.3176	101.138	118.47	109.28	116.251	109.289	98.0559	117.701	101.674	121.084	92.7785	88.1582	95.5742	99.4447	100.662	109.499	114.349	100.011	100.307	101.492	105.238	99.9858	92.8777	81.2561	95.6356	92.3734	88.3897	103.324	100.526	98.1185	94.6287	99.9542	101.978	110.211	102.683	97.7104	101.904	86.494	106.847	116.059
	104.257	101.871	104.625	104.849	105.788	113.84	112.964	104.053	103.224	95.4814	101.967	117.756	109.28	114.298	109.289	99.2816	118.481	100.085	121.084	92.7785	88.1582	95.5742	101.205	101.569	110.702	114.349	100.011	99.294	101.492	105.238	100.912	93.7145	82.2978	95.6356	93.8754	88.9527	104.013	100.526	98.1185	94.6287	101.516	101.978	110.211	100.367	96.9702	101.904	85.5835	105.778	116.059
	103.501	101.23	104.625	104.078	105.123	112.088	114.929	104.841	104.084	94.5633	101.967	116.329	109.28	112.344	109.289	99.2816	117.701	100.085	119.782	91.9195	88.762	96.5205	103.845	101.569	110.702	114.349	100.011	100.307	102.863	105.238	99.0601	92.8777	83.3396	96.5294	94.6264	88.9527	104.013	101.807	97.2799	95.4239	101.516	101.978	109.218	99.5949	96.23	100.832	85.5835	104.71	117.002
	103.501	101.871	105.43	104.849	105.123	112.088	115.911	104.841	104.945	93.6452	101.967	114.188	109.28	111.367	108.379	100.507	116.922	100.085	118.48	91.0604	89.3659	96.5205	105.605	101.569	109.499	113.05	100.991	100.307	104.235	105.238	99.9858	91.2043	84.3813	95.6356	94.6264	88.9527	104.013	102.447	97.2799	95.4239	102.297	100.279	108.225	99.5949	95.4897	99.7589	85.5835	103.641	118.889
	103.501	101.23	106.235	104.078	105.788	112.964	113.946	105.629	105.805	92.7271	101.138	114.188	109.28	111.367	108.379	102.959	116.142	99.2908	117.178	90.2014	89.9697	97.4668	107.365	102.476	109.499	113.05	100.991	100.307	105.606	105.926	100.912	90.3675	85.423	95.6356	93.8754	89.5157	104.013	102.447	98.1185	95.4239	103.859	99.4287	107.232	98.8228	95.4897	99.7589	84.6731	103.641	119.833
	102.746	101.871	107.039	103.307	105.123	112.964	112.964	105.629	105.805	92.7271	100.309	114.188	109.28	113.321	109.289	102.959	116.142	99.2908	118.48	89.3423	89.3659	97.4668	107.365	103.383	108.296	114.349	99.0303	100.307	106.978	105.926	99.0601	90.3675	86.4648	94.7418	93.8754	90.0787	104.702	102.447	98.1185	97.0143	103.859	99.4287	106.239	99.5949	94.7495	98.6862	83.7626	102.573	120.776
	104.257	102.511	107.844	103.307	105.123	112.964	112.964	105.629	105.805	92.7271	99.4796	114.901	111.086	114.298	109.289	104.184	116.922	100.085	118.48	89.3423	88.762	96.5205	108.245	103.383	108.296	115.649	98.0498	100.307	105.606	105.926	99.0601	91.2043	87.5065	94.7418	94.6264	90.0787	104.702	102.447	99.7958	97.8095	103.078	99.4287	106.239	99.5949	94.7495	97.6135	83.7626	102.573	119.833
	104.257	102.511	108.649	104.078	105.788	112.964	112.964	105.629	106.665	92.7271	99.4796	115.615	112.893	114.298	111.111	102.959	115.363	101.674	115.876	89.3423	87.5544	96.5205	109.125	103.383	108.296	116.948	97.0693	101.32	104.235	105.238	98.1343	92.8777	88.5483	95.6356	94.6264	90.0787	105.391	102.447	99.7958	97.8095	103.078	99.4287	105.246	99.5949	94.7495	96.5408	82.8521	102.573	119.833
	105.012	103.152	109.454	104.078	105.788	112.964	112.964	105.629	104.945	93.6452	99.4796	115.615	113.796	113.321	111.111	101.733	115.363	101.674	114.574	89.3423	86.9506	95.5742	110.005	104.29	107.093	118.247	96.0888	102.334	102.863	105.238	97.2085	93.7145	89.59	94.7418	93.8754	90.6416	105.391	102.447	100.634	99.3999	103.859	98.5789	106.239	99.5949	94.0093	96.5408	82.8521	103.641	119.833
	103.501	104.433	109.454	104.078	105.788	113.84	112.964	105.629	103.224	95.4814	99.4796	114.901	115.602	112.344	112.932	100.507	114.583	102.468	114.574	90.2014	86.3468	95.5742	110.885	104.29	105.889	118.247	95.1083	102.334	101.492	105.238	97.2085	92.041	89.59	95.6356	93.8754	90.0787	104.702	102.447	100.634	99.3999	104.64	96.8793	107.232	100.367	93.269	96.5408	82.8521	104.71	119.833
	101.99	105.074	109.454	104.849	105.123	113.84	112.964	104.841	101.504	97.3176	99.4796	114.188	116.505	112.344	114.754	101.733	113.804	103.262	115.876	91.0604	85.7429	95.5742	110.885	104.29	105.889	118.247	96.0888	102.334	100.12	105.238	96.2827	91.2043	88.5483	96.5294	94.6264	88.9527	105.391	102.447	100.634	100.99	104.64	96.0294	106.239	101.139	93.269	96.5408	84.6731	104.71	119.833
	101.99	106.356	107.844	104.849	105.123	113.84	111.982	104.841	100.644	99.1537	99.4796	113.474	117.408	113.321	115.665	102.959	113.804	102.468	117.178	91.9195	85.7429	95.5742	110.005	105.197	107.093	115.649	97.0693	102.334	100.12	104.551	97.2085	92.041	87.5065	97.4231	95.3775	88.3897	106.08	103.087	99.7958	100.99	103.859	95.1796	106.239	101.911	92.5288	96.5408	87.4045	105.778	120.776
	101.99	106.356	108.649	105.62	105.123	113.84	111.982	105.629	99.7834	100.072	100.309	113.474	118.311	114.298	115.665	102.959	113.025	105.645	118.48	92.7785	85.1391	94.628	107.365	106.104	105.889	116.948	99.0303	102.334	97.3772	103.863	97.2085	91.2043	86.4648	98.3169	96.1285	87.2637	105.391	103.087	98.9571	100.99	102.297	94.3298	106.239	102.683	92.5288	96.5408	90.1359	105.778	121.72
	101.99	106.996	107.844	106.391	105.123	114.716	110.017	106.418	100.644	100.99	100.309	112.76	118.311	116.251	114.754	101.733	113.025	104.851	117.178	91.0604	83.9315	94.628	106.485	107.917	104.686	116.948	100.991	101.32	97.3772	104.551	96.2827	92.8777	84.3813	100.105	96.8795	86.7007	106.08	103.087	98.1185	102.581	100.735	94.3298	105.246	101.911	92.5288	95.4682	91.0463	106.847	121.72
	101.235	106.996	108.649	106.391	105.123	112.964	109.035	107.206	100.644	100.072	100.309	112.047	117.408	117.228	114.754	102.959	112.245	106.44	115.876	90.2014	83.3276	93.6817	103.845	108.824	104.686	115.649	101.972	101.32	96.0057	104.551	96.2827	93.7145	82.2978	100.105	96.8795	86.7007	106.08	103.087	98.9571	103.376	99.1733	94.3298	105.246	101.139	93.269	95.4682	91.0463	107.915	122.664
	101.99	106.996	108.649	105.62	105.788	112.088	108.053	107.994	99.7834	100.072	100.309	111.333	116.505	116.251	114.754	102.959	113.025	105.645	114.574	90.2014	82.7238	92.7354	100.325	109.731	104.686	116.948	103.933	100.307	96.0057	103.863	96.2827	94.5512	81.2561	99.2107	96.8795	87.8267	105.391	103.087	98.9571	102.581	99.9542	95.1796	105.246	99.5949	93.269	96.5408	91.0463	108.984	122.664
	101.99	105.715	110.259	104.078	106.454	110.337	107.07	107.206	100.644	100.072	101.138	109.192	115.602	115.275	115.665	104.184	113.804	105.645	114.574	89.3423	82.12	92.7354	99.4447	109.731	103.483	115.649	105.894	99.294	94.6342	103.863	97.2085	94.5512	80.2143	97.4231	96.8795	88.3897	104.702	103.087	98.9571	102.581	101.516	96.0294	105.246	97.2787	93.269	96.5408	91.0463	108.984	121.72
	103.501	105.074	109.454	104.078	107.119	109.461	107.07	106.418	101.504	99.1537	100.309	107.765	114.699	115.275	118.397	105.41	113.804	105.645	117.178	89.3423	82.12	91.7891	97.6846	108.824	103.483	114.349	108.835	98.2807	94.6342	104.551	97.2085	94.5512	80.2143	97.4231	96.8795	88.9527	103.324	103.087	100.634	102.581	102.297	96.8793	105.246	97.2787	94.0093	96.5408	89.2254	108.984	119.833
	102.746	105.074	108.649	104.078	107.119	108.586	106.088	105.629	101.504	98.2356	100.309	107.051	113.796	114.298	121.129	106.636	114.583	104.851	118.48	89.3423	82.7238	91.7891	95.0445	107.917	102.279	114.349	107.855	97.2675	94.6342	104.551	97.2085	93.7145	80.2143	97.4231	98.3815	89.5157	103.324	103.727	100.634	100.99	102.297	98.5789	105.246	96.5067	94.0093	95.4682	88.3149	107.915	118.889
	102.746	104.433	108.649	104.078	107.119	108.586	106.088	104.841	103.224	98.2356	100.309	107.051	112.893	114.298	122.951	107.861	115.363	104.057	121.084	89.3423	83.3276	92.7354	93.2844	107.917	103.483	116.948	105.894	98.2807	96.0057	103.863	96.2827	92.8777	80.2143	97.4231	99.1325	89.5157	104.013	103.727	101.473	100.99	102.297	99.4287	105.246	97.2787	94.7495	96.5408	87.4045	104.71	117.946
	101.99	104.433	107.844	104.849	107.784	109.461	106.088	104.053	104.084	98.2356	100.309	107.051	111.989	115.275	122.951	110.313	115.363	102.468	122.386	89.3423	82.7238	92.7354	92.4043	107.917	103.483	116.948	103.933	98.2807	98.7487	103.863	96.2827	92.041	80.2143	96.5294	97.6305	90.0787	104.013	103.727	101.473	100.195	102.297	100.279	106.239	98.0508	94.0093	94.3955	88.3149	102.573	117.946
	101.99	105.074	107.039	104.849	107.784	109.461	107.07	104.053	105.805	98.2356	101.138	107.051	111.086	114.298	122.04	112.764	115.363	102.468	122.386	89.3423	80.9123	91.7891	92.4043	107.917	104.686	119.547	103.933	99.294	98.7487	103.863	94.4311	92.041	80.2143	96.5294	98.3815	90.6416	104.013	103.727	100.634	99.3999	103.078	101.128	106.239	99.5949	94.0093	93.3228	88.3149	100.436	117.002
	102.746	105.074	107.039	105.62	108.45	109.461	109.035	104.053	107.525	98.2356	101.967	107.765	111.086	112.344	122.951	115.216	115.363	103.262	122.386	89.3423	78.497	91.7891	91.5243	107.01	104.686	122.146	103.933	99.294	100.12	103.863	95.3569	92.041	81.2561	99.2107	98.3815	91.2046	104.013	103.087	99.7958	98.6047	103.078	101.978	106.239	99.5949	94.0093	93.3228	88.3149	99.3676	116.059
	102.746	104.433	107.039	105.62	108.45	110.337	109.035	104.053	106.665	99.1537	101.138	108.478	111.086	111.367	120.218	117.667	115.363	102.468	122.386	90.2014	76.6856	90.8428	90.6443	107.917	103.483	122.146	102.952	100.307	100.12	103.863	95.3569	92.041	82.2978	100.105	97.6305	91.7676	104.013	103.087	98.9571	98.6047	103.078	101.978	106.239	98.0508	94.0093	91.1775	89.2254	98.2992	116.059
	102.746	103.152	107.039	105.62	108.45	111.213	110.017	103.264	107.525	100.99	99.4796	109.192	111.989	111.367	118.397	117.667	116.142	101.674	121.084	91.0604	75.4779	90.8428	88.8842	107.917	103.483	122.146	101.972	101.32	100.12	104.551	95.3569	92.041	83.3396	100.105	95.3775	92.8936	103.324	103.087	98.9571	97.8095	103.859	101.978	106.239	97.2787	94.0093	90.1048	88.3149	98.2992	115.115
	102.746	103.152	109.454	105.62	107.784	111.213	110.017	103.264	107.525	101.908	98.6506	109.906	113.796	111.367	116.575	116.441	116.142	100.085	119.782	91.9195	75.4779	90.8428	88.0041	107.01	102.279	119.547	100.011	101.32	98.7487	105.238	95.3569	91.2043	84.3813	99.2107	96.1285	93.4566	103.324	102.447	98.9571	96.2191	103.859	101.128	106.239	95.7346	94.7495	90.1048	88.3149	98.2992	116.059
	102.746	103.793	110.259	105.62	107.784	112.088	109.035	103.264	107.525	102.826	97.8216	109.192	114.699	112.344	115.665	115.216	116.922	100.085	119.782	95.3557	76.0818	89.8966	87.1241	107.01	101.076	118.247	98.0498	102.334	98.7487	105.926	95.3569	90.3675	84.3813	98.3169	95.3775	94.0196	102.635	102.447	98.9571	96.2191	103.859	100.279	106.239	94.9626	94.7495	92.2501	89.2254	98.2992	117.002
	103.501	103.793	110.259	104.849	108.45	111.213	107.07	102.476	108.385	101.908	96.9926	107.051	115.602	114.298	115.665	113.99	116.142	101.674	118.48	97.0738	77.8932	88.9503	88.0041	106.104	101.076	115.649	98.0498	102.334	98.7487	105.926	95.3569	89.5308	85.423	97.4231	96.1285	95.1456	102.635	103.087	98.9571	94.6287	103.078	99.4287	107.232	94.1905	95.4897	94.3955	90.1359	99.3676	118.889
	104.257	104.433	109.454	104.849	109.115	110.337	107.07	103.264	110.106	100.072	97.8216	105.624	115.602	116.251	113.843	112.764	116.142	101.674	117.178	97.0738	79.7047	88.9503	88.8842	105.197	101.076	116.948	98.0498	102.334	97.3772	104.551	96.2827	89.5308	85.423	96.5294	95.3775	94.5826	102.635	102.447	98.9571	94.6287	103.078	98.5789	107.232	94.9626	95.4897	96.5408	90.1359	101.505	119.833
	104.257	105.715	108.649	104.849	109.78	107.71	106.088	101.688	109.246	99.1537	97.8216	104.196	115.602	116.251	113.843	111.539	115.363	101.674	114.574	96.2148	81.5162	88.9503	88.8842	104.29	99.8728	114.349	97.0693	101.32	97.3772	104.551	97.2085	90.3675	85.423	95.6356	96.8795	94.0196	102.635	102.447	99.7958	95.4239	102.297	98.5789	107.232	96.5067	95.4897	96.5408	90.1359	103.641	119.833
	105.012	106.996	109.454	105.62	109.78	106.834	106.088	100.9	109.246	98.2356	98.6506	103.483	115.602	115.275	112.932	109.087	115.363	100.085	113.272	96.2148	82.12	89.8966	90.6443	105.197	98.6695	113.05	96.0888	101.32	97.3772	105.238	98.1343	89.5308	85.423	96.5294	96.8795	93.4566	102.635	101.807	98.9571	96.2191	102.297	96.8793	106.239	97.2787	95.4897	96.5408	90.1359	105.778	118.889
	105.012	107.637	110.259	105.62	109.78	105.959	106.088	99.323	108.385	97.3176	98.6506	102.769	115.602	115.275	112.022	106.636	114.583	99.2908	113.272	93.6376	82.12	90.8428	91.5243	105.197	98.6695	110.451	96.0888	99.294	96.0057	103.863	98.1343	88.6941	83.3396	96.5294	96.8795	92.8936	101.258	101.807	98.1185	96.2191	102.297	96.0294	106.239	98.0508	96.23	96.5408	91.0463	107.915	118.889
	105.012	108.278	109.454	106.391	109.78	106.834	106.088	97.7465	106.665	97.3176	97.8216	102.769	113.796	115.275	111.111	105.41	114.583	98.4965	114.574	91.9195	82.7238	90.8428	93.2844	106.104	96.2629	110.451	96.0888	98.2807	96.0057	104.551	99.0601	89.5308	81.2561	97.4231	96.8795	92.8936	101.258	101.807	98.1185	96.2191	101.516	96.0294	106.239	99.5949	96.23	96.5408	92.8672	108.984	117.946
	105.012	108.278	110.259	105.62	109.78	107.71	105.106	96.9582	105.805	97.3176	97.8216	102.769	112.893	117.228	111.111	104.184	115.363	98.4965	114.574	91.0604	82.12	90.8428	94.1644	105.197	95.0597	111.75	95.1083	98.2807	96.0057	103.863	97.2085	89.5308	80.2143	97.4231	96.8795	92.8936	101.947	102.447	96.4413	97.0143	100.735	96.8793	105.246	99.5949	96.9702	96.5408	93.7777	111.121	116.059
	104.257	108.278	111.063	104.849	109.78	107.71	105.106	96.9582	107.525	98.2356	97.8216	102.769	111.989	118.205	112.022	106.636	115.363	98.4965	115.876	90.2014	81.5162	90.8428	94.1644	104.29	95.0597	110.451	95.1083	98.2807	97.3772	103.863	95.3569	88.6941	79.1726	97.4231	97.6305	92.8936	103.324	102.447	96.4413	97.0143	99.9542	96.8793	105.246	101.139	97.7104	96.5408	94.6882	112.189	115.115
	105.768	107.637	111.063	104.078	108.45	105.959	105.106	97.7465	108.385	99.1537	97.8216	102.769	111.086	120.159	113.843	107.861	115.363	97.7021	117.178	91.0604	80.9123	91.7891	95.0445	104.29	95.0597	113.05	96.0888	97.2675	98.7487	103.863	94.4311	89.5308	79.1726	97.4231	97.6305	92.8936	104.702	102.447	94.764	99.3999	99.9542	96.8793	105.246	101.139	97.7104	96.5408	93.7777	114.326	112.284
	104.257	107.637	111.063	104.078	108.45	105.959	105.106	97.7465	108.385	99.1537	97.8216	102.055	111.086	121.136	115.665	109.087	114.583	98.4965	119.782	91.9195	80.3085	90.8428	95.9245	104.29	95.0597	111.75	95.1083	96.2543	97.3772	103.863	94.4311	91.2043	80.2143	97.4231	97.6305	92.8936	105.391	102.447	93.0868	97.8095	98.3924	96.0294	105.246	100.367	97.7104	97.6135	91.9568	115.395	110.397
	103.501	108.918	111.063	104.078	107.119	106.834	105.106	99.323	107.525	99.1537	98.6506	102.055	110.183	123.09	117.486	109.087	113.804	99.2908	121.084	91.9195	80.3085	91.7891	97.6846	104.29	95.0597	111.75	94.1278	95.2411	96.0057	104.551	93.5053	91.2043	81.2561	97.4231	97.6305	93.4566	105.391	101.807	92.2482	97.0143	98.3924	96.0294	106.239	98.0508	97.7104	98.6862	91.0463	115.395	108.51
	103.501	108.278	111.868	103.307	107.119	105.959	105.106	99.323	104.945	98.2356	98.6506	102.769	110.183	123.09	120.218	109.087	113.025	100.085	122.386	92.7785	80.9123	90.8428	97.6846	105.197	95.0597	109.152	95.1083	95.2411	96.0057	104.551	93.5053	92.041	81.2561	97.4231	97.6305	93.4566	104.702	101.807	91.4096	96.2191	99.1733	97.7291	108.225	96.5067	96.9702	99.7589	89.2254	114.326	106.623
	103.501	110.2	111.063	104.078	107.119	104.207	106.088	100.111	103.224	96.3995	98.6506	102.769	110.183	123.09	121.129	109.087	113.025	100.879	124.99	91.9195	82.12	90.8428	98.5646	105.197	95.0597	107.852	95.1083	95.2411	96.0057	103.863	92.5795	92.041	82.2978	97.4231	96.8795	92.8936	104.013	100.526	91.4096	95.4239	97.6115	97.7291	110.211	94.9626	96.23	104.05	91.0463	113.258	105.679
	103.501	108.918	110.259	104.078	107.784	103.332	106.088	100.9	101.504	94.5633	99.4796	104.196	110.183	122.113	120.218	107.861	113.025	100.879	123.688	91.9195	83.9315	91.7891	101.205	105.197	95.0597	107.852	96.0888	96.2543	94.6342	103.175	91.6537	92.041	83.3396	98.3169	95.3775	92.8936	104.013	100.526	90.5709	94.6287	96.0497	96.8793	111.203	94.9626	95.4897	105.122	91.0463	111.121	103.792
	103.501	108.918	110.259	104.849	109.115	104.207	106.088	101.688	101.504	93.6452	100.309	104.91	110.183	120.159	121.129	106.636	113.025	100.879	123.688	92.7785	85.1391	91.7891	102.085	105.197	95.0597	109.152	96.0888	96.2543	93.2627	103.863	90.7279	91.2043	83.3396	98.3169	94.6264	92.8936	104.013	100.526	89.7323	93.8335	95.2688	96.0294	112.196	95.7346	95.4897	106.195	91.9568	110.052	102.849
	103.501	108.918	109.454	104.849	109.115	103.332	107.07	101.688	101.504	93.6452	101.138	105.624	110.183	119.182	122.04	105.41	112.245	101.674	123.688	92.7785	85.7429	90.8428	103.845	105.197	95.0597	109.152	99.0303	97.2675	93.2627	104.551	89.8021	89.5308	83.3396	98.3169	93.8754	92.8936	103.324	99.8857	88.8937	93.8335	93.7071	95.1796	110.211	96.5067	94.7495	106.195	91.9568	110.052	103.792
	102.746	108.278	109.454	104.078	109.78	104.207	106.088	100.9	101.504	94.5633	101.967	106.337	110.183	118.205	123.861	104.184	111.466	101.674	122.386	92.7785	86.3468	90.8428	103.845	104.29	96.2629	109.152	99.0303	96.2543	93.2627	105.238	89.8021	89.5308	83.3396	98.3169	93.8754	92.8936	102.635	99.2454	89.7323	93.8335	92.9262	95.1796	108.225	98.0508	94.7495	105.122	91.9568	112.189	103.792
	101.99	108.278	108.649	103.307	109.78	105.083	107.07	100.9	101.504	94.5633	101.138	107.765	110.183	118.205	123.861	102.959	110.686	101.674	122.386	91.9195	86.3468	90.8428	104.725	104.29	97.4662	109.152	99.0303	96.2543	93.2627	105.238	88.8763	88.6941	83.3396	99.2107	93.8754	91.7676	102.635	99.8857	89.7323	93.0383	92.1453	96.0294	106.239	99.5949	94.7495	105.122	92.8672	113.258	104.736
	101.99	108.918	107.844	103.307	109.115	105.959	108.053	100.9	102.364	95.4814	101.138	107.765	111.086	119.182	124.772	101.733	111.466	102.468	122.386	91.0604	86.9506	91.7891	103.845	103.383	98.6695	107.852	98.0498	95.2411	93.2627	105.238	89.8021	89.5308	83.3396	99.2107	93.1244	91.7676	101.947	99.8857	90.5709	92.2431	92.1453	98.5789	105.246	101.139	94.7495	104.05	92.8672	113.258	105.679
	102.746	109.559	108.649	104.078	109.115	107.71	109.035	101.688	102.364	94.5633	101.138	108.478	111.086	118.205	126.594	101.733	112.245	101.674	122.386	91.0604	86.9506	92.7354	102.085	103.383	99.8728	107.852	97.0693	94.2279	91.8912	106.614	89.8021	90.3675	84.3813	99.2107	93.8754	92.3306	101.947	99.2454	91.4096	92.2431	90.5835	100.279	104.253	101.139	94.7495	104.05	92.8672	113.258	106.623
	102.746	109.559	107.844	104.078	109.115	106.834	110.017	102.476	103.224	94.5633	101.138	109.192	110.183	116.251	127.504	100.507	113.025	101.674	121.084	91.0604	86.3468	93.6817	101.205	103.383	101.076	106.553	95.1083	93.2147	91.8912	105.926	89.8021	89.5308	84.3813	99.2107	93.1244	92.8936	101.947	98.6051	93.0868	91.4479	90.5835	101.128	103.26	101.139	94.7495	104.05	91.9568	113.258	106.623
	102.746	109.559	107.844	104.078	108.45	105.959	111.982	103.264	103.224	94.5633	101.138	109.192	109.28	115.275	128.415	100.507	113.025	102.468	119.782	91.9195	85.7429	94.628	99.4447	103.383	102.279	103.954	95.1083	94.2279	93.2627	105.238	91.6537	90.3675	84.3813	99.2107	92.3734	92.3306	101.258	98.6051	93.9254	90.6527	90.5835	101.128	102.267	101.139	95.4897	102.977	91.0463	112.189	105.679
	102.746	110.2	107.039	104.849	108.45	105.083	112.964	103.264	103.224	95.4814	101.138	109.906	109.28	115.275	130.237	100.507	112.245	103.262	119.782	91.9195	85.1391	95.5742	97.6846	104.29	101.076	102.654	95.1083	94.2279	94.6342	104.551	92.5795	90.3675	84.3813	99.2107	91.6224	91.7676	100.569	97.3245	93.9254	90.6527	89.8026	100.279	101.275	101.139	95.4897	101.904	89.2254	113.258	105.679
	101.235	110.2	107.039	104.849	108.45	105.959	113.946	103.264	102.364	96.3995	100.309	109.906	109.28	116.251	130.237	98.0559	112.245	103.262	117.178	92.7785	85.1391	96.5205	95.9245	104.29	98.6695	103.954	96.0888	94.2279	94.6342	103.175	93.5053	87.8573	85.423	99.2107	91.6224	90.6416	99.8801	97.9648	93.9254	90.6527	90.5835	99.4287	100.282	101.911	95.4897	101.904	86.494	115.395	106.623
	101.235	108.918	107.039	104.849	108.45	107.71	112.964	103.264	102.364	96.3995	99.4796	109.192	109.28	117.228	132.058	95.6045	113.025	103.262	115.876	91.9195	85.1391	95.5742	95.9245	105.197	95.0597	103.954	98.0498	94.2279	94.6342	103.863	94.4311	87.8573	86.4648	100.105	92.3734	90.0787	99.1913	97.9648	93.9254	92.2431	89.8026	98.5789	99.2888	102.683	96.23	101.904	85.5835	116.463	107.567
	101.235	109.559	107.844	104.078	107.784	107.71	112.964	101.688	101.504	96.3995	98.6506	109.906	109.28	117.228	132.969	94.3788	113.025	103.262	115.876	91.0604	85.1391	94.628	94.1644	105.197	95.0597	105.253	97.0693	94.2279	96.0057	103.863	95.3569	87.0206	87.5065	100.998	91.6224	90.0787	99.1913	97.9648	93.9254	93.0383	89.8026	98.5789	99.2888	102.683	96.23	101.904	86.494	118.6	108.51
	102.746	110.2	109.454	102.536	106.454	107.71	112.964	100.9	103.224	96.3995	100.309	109.906	109.28	117.228	133.88	94.3788	113.804	101.674	114.574	91.0604	85.7429	94.628	92.4043	104.29	95.0597	106.553	94.1278	95.2411	97.3772	103.863	95.3569	87.0206	88.5483	100.998	90.8714	90.0787	99.1913	97.9648	93.9254	93.8335	89.8026	98.5789	99.2888	102.683	96.9702	102.977	87.4045	119.669	109.454
	103.501	108.918	110.259	101.765	106.454	106.834	113.946	99.323	104.945	96.3995	101.138	109.906	109.28	118.205	133.88	94.3788	113.804	100.879	115.876	90.2014	85.7429	95.5742	91.5243	103.383	95.0597	105.253	94.1278	94.2279	97.3772	104.551	96.2827	87.0206	87.5065	100.105	90.8714	90.0787	100.569	97.3245	94.764	94.6287	89.8026	99.4287	99.2888	102.683	96.9702	102.977	88.3149	119.669	110.397
	104.257	109.559	110.259	101.765	107.119	105.959	112.964	98.5347	106.665	96.3995	101.138	109.192	109.28	120.159	133.88	94.3788	114.583	100.879	115.876	91.0604	85.7429	96.5205	90.6443	103.383	95.0597	106.553	94.1278	94.2279	97.3772	103.175	98.1343	87.8573	88.5483	99.2107	90.8714	89.5157	101.258	97.3245	94.764	94.6287	91.3644	99.4287	100.282	102.683	97.7104	102.977	88.3149	119.669	110.397
	104.257	108.278	110.259	102.536	107.784	104.207	111.982	98.5347	104.945	97.3176	101.967	109.906	109.28	121.136	132.969	94.3788	115.363	100.085	115.876	91.0604	85.1391	95.5742	90.6443	102.476	96.2629	106.553	96.0888	93.2147	97.3772	103.863	99.9858	87.8573	88.5483	99.2107	91.6224	89.5157	101.258	97.3245	95.6027	96.2191	91.3644	98.5789	102.267	101.911	96.9702	104.05	88.3149	118.6	111.341
	105.012	108.278	110.259	103.307	109.115	103.332	110.017	97.7465	103.224	97.3176	101.967	109.906	109.28	122.113	132.058	94.3788	116.142	100.879	114.574	91.9195	83.9315	95.5742	92.4043	101.569	96.2629	109.152	98.0498	93.2147	97.3772	103.175	100.912	87.8573	89.59	100.105	91.6224	89.5157	101.258	97.9648	94.764	95.4239	91.3644	96.8793	103.26	101.139	96.9702	102.977	87.4045	118.6	111.341
	105.768	108.278	109.454	104.078	109.115	103.332	109.035	96.1699	102.364	97.3176	101.967	109.192	109.28	121.136	131.147	94.3788	116.922	102.468	113.272	91.9195	82.7238	94.628	95.0445	98.8486	96.2629	107.852	98.0498	94.2279	98.7487	102.487	99.0601	88.6941	89.59	100.105	91.6224	90.0787	101.258	97.3245	94.764	96.2191	92.1453	96.8793	105.246	100.367	96.9702	102.977	87.4045	118.6	111.341
	106.523	107.637	110.259	104.078	108.45	104.207	108.053	96.1699	102.364	96.3995	101.967	109.192	108.377	120.159	128.415	93.1531	116.922	102.468	113.272	92.7785	80.9123	94.628	98.5646	97.9418	96.2629	109.152	95.1083	94.2279	98.7487	101.111	97.2085	88.6941	88.5483	100.105	90.8714	90.6416	100.569	97.3245	94.764	97.8095	92.9262	96.0294	106.239	100.367	96.9702	104.05	85.5835	117.532	111.341
	105.768	106.996	109.454	104.078	107.784	105.083	107.07	97.7465	103.224	96.3995	101.967	107.051	108.377	119.182	127.504	93.1531	116.922	101.674	113.272	93.6376	79.7047	94.628	101.205	96.128	93.8564	110.451	95.1083	95.2411	100.12	100.424	94.4311	87.0206	87.5065	100.998	90.8714	91.7676	100.569	98.6051	94.764	97.0143	93.7071	96.0294	107.232	101.139	96.9702	104.05	85.5835	117.532	112.284
	105.768	106.996	111.063	103.307	107.784	107.71	106.088	99.323	103.224	97.3176	102.796	105.624	108.377	119.182	127.504	93.1531	115.363	101.674	111.97	92.7785	79.1009	94.628	102.965	96.128	92.6531	110.451	95.1083	95.2411	98.7487	101.799	92.5795	86.1839	87.5065	100.998	89.3694	92.3306	99.8801	97.9648	94.764	97.8095	96.0497	96.0294	108.225	101.139	96.9702	105.122	84.6731	115.395	112.284
	105.012	106.356	111.063	103.307	107.784	109.461	107.07	101.688	102.364	97.3176	102.796	103.483	109.28	119.182	127.504	95.6045	114.583	100.879	110.668	93.6376	79.1009	94.628	102.965	97.0349	90.2465	111.75	94.1278	96.2543	97.3772	101.799	90.7279	85.3471	88.5483	100.998	90.1204	93.4566	99.8801	97.3245	94.764	97.8095	96.0497	96.0294	108.225	101.139	97.7104	105.122	83.7626	114.326	111.341
	104.257	106.356	110.259	103.307	107.784	109.461	109.035	102.476	103.224	97.3176	102.796	102.055	108.377	119.182	126.594	96.8302	114.583	100.879	109.366	92.7785	79.7047	93.6817	102.965	97.9418	89.0432	113.05	92.1668	95.2411	97.3772	102.487	90.7279	84.5104	89.59	100.105	90.1204	94.5826	99.8801	96.6842	94.764	97.8095	95.2688	96.8793	108.225	101.911	98.4507	104.05	83.7626	114.326	109.454
	105.012	106.356	111.868	102.536	107.784	111.213	110.999	102.476	101.504	98.2356	101.967	101.342	108.377	118.205	124.772	96.8302	113.804	101.674	108.064	93.6376	79.7047	93.6817	101.205	98.8486	87.8399	111.75	91.1863	95.2411	97.3772	103.863	91.6537	84.5104	88.5483	99.2107	91.6224	95.1456	99.8801	96.0439	94.764	97.8095	94.488	98.5789	106.239	101.139	98.4507	102.977	84.6731	113.258	108.51
	104.257	105.715	111.868	102.536	107.784	110.337	111.982	100.9	102.364	98.2356	102.796	100.628	107.474	116.251	122.951	96.8302	113.804	102.468	106.762	93.6376	80.3085	92.7354	99.4447	100.662	86.6366	113.05	90.2058	95.2411	97.3772	104.551	92.5795	83.6736	88.5483	98.3169	90.8714	95.1456	99.1913	95.4036	94.764	97.8095	94.488	99.4287	105.246	100.367	99.9311	100.832	86.494	110.052	107.567
	103.501	105.715	111.063	102.536	107.119	110.337	111.982	100.111	101.504	99.1537	102.796	99.9142	108.377	116.251	122.04	95.6045	113.804	101.674	106.762	93.6376	80.9123	91.7891	98.5646	101.569	87.8399	113.05	89.2253	96.2543	96.0057	105.926	94.4311	84.5104	88.5483	98.3169	90.8714	94.5826	99.1913	95.4036	95.6027	97.8095	93.7071	100.279	104.253	100.367	99.9311	99.7589	89.2254	107.915	107.567
	103.501	106.356	111.868	102.536	106.454	110.337	110.999	98.5347	101.504	99.1537	103.625	100.628	109.28	115.275	121.129	95.6045	113.804	101.674	106.762	93.6376	81.5162	90.8428	97.6846	101.569	87.8399	110.451	91.1863	95.2411	96.0057	106.614	93.5053	85.3471	87.5065	99.2107	90.1204	93.4566	99.1913	95.4036	95.6027	97.8095	94.488	101.128	104.253	100.367	99.9311	98.6862	88.3149	106.847	107.567
	103.501	106.996	111.063	104.078	105.123	112.088	110.999	96.9582	101.504	98.2356	103.625	100.628	110.183	115.275	121.129	96.8302	113.025	101.674	108.064	93.6376	83.3276	90.8428	96.8045	102.476	87.8399	109.152	92.1668	94.2279	94.6342	106.614	94.4311	84.5104	86.4648	100.105	90.1204	92.8936	99.8801	95.4036	97.2799	98.6047	95.2688	100.279	104.253	99.5949	99.9311	99.7589	89.2254	105.778	108.51
	103.501	107.637	110.259	104.849	105.123	111.213	111.982	97.7465	100.644	98.2356	104.454	100.628	111.989	116.251	120.218	96.8302	113.025	100.879	108.064	93.6376	84.5353	89.8966	95.9245	102.476	87.8399	109.152	93.1473	93.2147	96.0057	106.614	95.3569	86.1839	85.423	100.998	90.8714	92.3306	100.569	96.0439	98.1185	98.6047	96.0497	99.4287	106.239	99.5949	99.9311	100.832	91.0463	105.778	108.51
	103.501	106.996	111.063	105.62	105.123	111.213	110.999	96.9582	98.9232	98.2356	104.454	100.628	112.893	117.228	120.218	98.0559	113.025	100.879	108.064	94.4967	85.7429	88.9503	95.9245	103.383	87.8399	110.451	93.1473	92.2015	97.3772	105.926	96.2827	87.0206	84.3813	102.786	91.6224	92.3306	100.569	96.0439	98.9571	98.6047	96.0497	99.4287	107.232	100.367	99.9311	99.7589	91.9568	105.778	108.51
	104.257	105.715	111.868	106.391	104.458	110.337	110.017	97.7465	99.7834	97.3176	103.625	100.628	113.796	117.228	119.308	98.0559	112.245	100.085	106.762	94.4967	85.7429	88.9503	96.8045	103.383	87.8399	110.451	93.1473	91.1883	97.3772	105.926	97.2085	88.6941	83.3396	103.68	91.6224	92.3306	100.569	96.0439	99.7958	99.3999	96.8306	99.4287	108.225	100.367	99.9311	99.7589	91.9568	106.847	109.454
	105.012	105.715	111.063	106.391	104.458	110.337	109.035	96.9582	99.7834	97.3176	103.625	99.9142	114.699	117.228	120.218	99.2816	112.245	100.879	108.064	94.4967	85.1391	88.004	98.5646	102.476	87.8399	109.152	92.1668	92.2015	97.3772	105.926	97.2085	89.5308	83.3396	103.68	92.3734	91.7676	99.8801	96.0439	99.7958	100.195	96.0497	98.5789	109.218	100.367	99.9311	99.7589	93.7777	107.915	110.397
	105.768	105.074	111.868	106.391	103.792	109.461	109.035	96.9582	99.7834	97.3176	102.796	99.9142	113.796	118.205	122.04	99.2816	112.245	100.085	110.668	95.3557	84.5353	88.004	99.4447	102.476	87.8399	110.451	91.1863	92.2015	98.7487	105.926	98.1343	90.3675	83.3396	103.68	93.1244	91.2046	99.1913	96.0439	98.1185	100.195	96.0497	96.8793	109.218	99.5949	99.1909	100.832	94.6882	108.984	112.284
	106.523	105.715	111.868	104.849	103.792	107.71	110.017	96.9582	100.644	95.4814	102.796	99.9142	112.893	118.205	122.951	100.507	113.025	100.879	110.668	94.4967	84.5353	88.004	100.325	102.476	87.8399	107.852	91.1863	93.2147	97.3772	105.238	97.2085	90.3675	83.3396	102.786	92.3734	90.6416	99.8801	95.4036	96.4413	97.8095	95.2688	96.0294	109.218	99.5949	98.4507	101.904	94.6882	110.052	112.284
	106.523	105.715	111.868	103.307	103.792	106.834	109.035	96.9582	100.644	94.5633	101.967	100.628	111.989	118.205	123.861	101.733	113.025	101.674	110.668	95.3557	84.5353	88.004	102.965	102.476	87.8399	109.152	89.2253	93.2147	98.7487	104.551	96.2827	88.6941	82.2978	102.786	93.8754	90.0787	99.8801	95.4036	94.764	98.6047	95.2688	95.1796	108.225	100.367	96.9702	101.904	95.5986	111.121	111.341
	105.012	105.715	113.478	103.307	103.792	105.959	109.035	96.9582	100.644	93.6452	101.967	102.769	111.989	118.205	124.772	100.507	113.804	103.262	110.668	94.4967	84.5353	88.9503	102.085	103.383	89.0432	109.152	90.2058	94.2279	98.7487	103.863	96.2827	88.6941	82.2978	103.68	94.6264	90.0787	99.8801	94.123	93.0868	97.8095	94.488	94.3298	107.232	100.367	96.23	101.904	94.6882	111.121	110.397
	104.257	106.996	115.087	104.078	103.127	105.083	110.017	96.9582	99.7834	95.4814	101.967	104.196	111.086	119.182	125.683	100.507	113.804	104.851	109.366	93.6376	85.1391	90.8428	102.085	103.383	90.2465	109.152	89.2253	95.2411	98.7487	104.551	96.2827	87.8573	80.2143	105.467	95.3775	90.6416	99.1913	93.4827	92.2482	97.8095	93.7071	93.48	106.239	100.367	95.4897	100.832	92.8672	110.052	109.454
	104.257	106.996	115.892	104.849	103.127	105.959	110.017	96.9582	100.644	96.3995	101.967	104.91	110.183	119.182	126.594	100.507	113.804	104.057	108.064	93.6376	85.1391	91.7891	101.205	104.29	91.4498	109.152	90.2058	95.2411	100.12	105.238	94.4311	89.5308	79.1726	107.255	94.6264	91.2046	99.1913	92.8424	92.2482	97.8095	92.1453	94.3298	106.239	100.367	96.23	98.6862	91.9568	110.052	107.567
	104.257	106.996	117.502	105.62	103.792	105.083	110.017	97.7465	101.504	97.3176	101.967	104.91	108.377	119.182	125.683	100.507	113.804	104.057	108.064	95.3557	85.7429	91.7891	100.325	104.29	93.8564	107.852	90.2058	95.2411	100.12	105.238	92.5795	91.2043	78.1308	108.149	95.3775	91.2046	98.5025	92.8424	93.0868	98.6047	91.3644	95.1796	106.239	101.911	96.23	98.6862	91.0463	108.984	106.623
	103.501	107.637	117.502	105.62	104.458	105.083	109.035	99.323	103.224	98.2356	101.967	104.91	105.667	119.182	124.772	101.733	113.025	104.057	106.762	95.3557	86.9506	91.7891	99.4447	105.197	95.0597	105.253	90.2058	95.2411	100.12	105.238	90.7279	92.041	78.1308	109.042	96.1285	91.2046	97.8136	92.8424	93.0868	99.3999	90.5835	96.0294	107.232	102.683	96.9702	98.6862	90.1359	108.984	105.679
	102.746	107.637	117.502	105.62	104.458	105.959	110.017	100.111	101.504	98.2356	101.967	104.91	104.764	119.182	125.683	102.959	113.804	104.851	108.064	95.3557	87.5544	90.8428	99.4447	105.197	96.2629	105.253	89.2253	94.2279	101.492	105.926	89.8021	93.7145	79.1726	108.149	96.1285	90.6416	97.8136	92.8424	93.9254	100.195	90.5835	96.0294	108.225	103.455	97.7104	98.6862	91.0463	108.984	105.679
	102.746	107.637	119.111	105.62	105.123	105.959	110.017	101.688	100.644	98.2356	101.967	104.196	104.764	119.182	125.683	104.184	113.025	104.057	108.064	95.3557	87.5544	89.8966	99.4447	106.104	97.4662	106.553	87.2643	95.2411	100.12	105.926	89.8021	94.5512	79.1726	107.255	95.3775	90.0787	97.8136	92.8424	95.6027	100.99	89.8026	96.0294	109.218	103.455	97.7104	97.6135	94.6882	108.984	105.679
	101.99	106.996	119.916	106.391	105.788	106.834	110.999	102.476	99.7834	99.1537	102.796	102.769	105.667	118.205	124.772	105.41	112.245	102.468	109.366	94.4967	88.1582	88.9503	98.5646	106.104	97.4662	109.152	87.2643	95.2411	101.492	105.926	90.7279	94.5512	80.2143	105.467	94.6264	89.5157	98.5025	92.2021	95.6027	102.581	90.5835	96.8793	109.218	101.911	98.4507	98.6862	96.5091	111.121	106.623
	102.746	106.356	119.916	105.62	105.788	105.959	110.999	103.264	99.7834	100.072	103.625	104.196	105.667	117.228	124.772	105.41	111.466	100.879	110.668	94.4967	88.762	88.004	99.4447	107.01	98.6695	110.451	87.2643	95.2411	101.492	107.99	91.6537	93.7145	82.2978	104.573	93.8754	89.5157	98.5025	91.5619	95.6027	104.171	91.3644	96.8793	109.218	101.139	97.7104	97.6135	101.061	113.258	107.567
	103.501	106.996	119.111	104.849	105.788	105.959	110.017	104.841	101.504	99.1537	103.625	104.91	105.667	117.228	123.861	105.41	109.907	100.085	111.97	94.4967	88.762	88.004	100.325	106.104	98.6695	111.75	88.2448	94.2279	102.863	107.99	93.5053	92.8777	83.3396	105.467	93.1244	89.5157	99.1913	90.9216	95.6027	106.557	91.3644	97.7291	110.211	99.5949	97.7104	98.6862	101.972	115.395	107.567
	104.257	106.996	118.307	104.849	105.788	107.71	110.017	106.418	102.364	100.072	102.796	106.337	106.571	116.251	122.951	107.861	109.127	100.879	114.574	94.4967	88.762	88.004	100.325	106.104	97.4662	111.75	89.2253	93.2147	102.863	109.365	94.4311	92.041	84.3813	105.467	92.3734	89.5157	99.1913	90.9216	95.6027	107.352	91.3644	97.7291	110.211	99.5949	97.7104	98.6862	102.882	116.463	107.567
	104.257	108.278	115.892	104.849	105.788	106.834	109.035	106.418	102.364	99.1537	102.796	107.051	108.377	116.251	123.861	110.313	109.127	100.085	115.876	94.4967	88.1582	88.9503	100.325	106.104	97.4662	111.75	89.2253	92.2015	101.492	109.365	94.4311	91.2043	84.3813	105.467	91.6224	90.0787	99.1913	91.5619	95.6027	108.942	91.3644	97.7291	109.218	99.5949	97.7104	99.7589	104.703	117.532	106.623
	105.012	108.278	114.283	103.307	105.788	105.959	109.035	107.206	101.504	99.1537	102.796	107.051	109.28	117.228	123.861	110.313	108.348	100.879	114.574	93.6376	88.1582	88.9503	102.965	104.29	97.4662	111.75	89.2253	91.1883	101.492	111.429	95.3569	91.2043	83.3396	105.467	90.8714	90.6416	99.1913	92.2021	95.6027	110.533	91.3644	98.5789	108.225	100.367	97.7104	99.7589	106.524	117.532	105.679
	102.746	107.637	114.283	102.536	105.123	105.959	109.035	106.418	99.7834	100.072	103.625	107.765	111.086	118.205	124.772	110.313	109.127	100.879	113.272	93.6376	88.762	88.004	103.845	104.29	96.2629	111.75	90.2058	91.1883	101.492	111.429	96.2827	90.3675	83.3396	104.573	90.8714	90.6416	99.1913	92.8424	96.4413	109.737	92.9262	98.5789	107.232	101.139	98.4507	100.832	107.435	117.532	105.679
	102.746	107.637	115.087	101.765	105.123	105.083	109.035	107.206	99.7834	100.99	103.625	108.478	112.893	119.182	125.683	110.313	109.127	101.674	111.97	93.6376	88.762	88.9503	105.605	104.29	95.0597	110.451	90.2058	92.2015	101.492	112.117	95.3569	90.3675	84.3813	103.68	90.8714	90.6416	99.1913	93.4827	97.2799	109.737	92.1453	99.4287	106.239	101.139	98.4507	100.832	106.524	117.532	105.679
	101.99	108.278	114.283	101.765	105.123	104.207	110.017	106.418	98.9232	100.99	103.625	107.765	114.699	119.182	126.594	109.087	108.348	102.468	109.366	93.6376	88.1582	88.9503	106.485	104.29	93.8564	110.451	91.1863	92.2015	101.492	112.805	95.3569	91.2043	85.423	104.573	90.8714	90.6416	98.5025	93.4827	97.2799	108.942	91.3644	100.279	105.246	100.367	98.4507	101.904	105.614	118.6	106.623
	102.746	108.918	114.283	101.765	105.788	105.083	110.017	105.629	98.9232	100.99	102.796	106.337	115.602	119.182	127.504	110.313	107.568	103.262	108.064	95.3557	86.9506	88.9503	107.365	104.29	92.6531	110.451	91.1863	94.2279	100.12	112.117	95.3569	91.2043	85.423	105.467	91.6224	90.6416	97.8136	94.123	98.9571	107.352	91.3644	100.279	105.246	100.367	98.4507	100.832	106.524	119.669	106.623
	101.235	109.559	114.283	101.765	106.454	104.207	110.999	104.841	98.9232	100.99	103.625	105.624	115.602	118.205	128.415	111.539	106.789	104.851	106.762	95.3557	86.3468	88.9503	106.485	104.29	91.4498	111.75	91.1863	95.2411	100.12	112.117	94.4311	92.041	85.423	105.467	90.8714	91.2046	97.1248	94.7633	98.9571	106.557	90.5835	100.279	104.253	99.5949	99.1909	99.7589	108.345	120.737	106.623
	101.99	110.2	114.283	102.536	106.454	103.332	110.999	104.053	101.504	100.99	104.454	104.196	115.602	117.228	128.415	113.99	107.568	104.851	106.762	95.3557	86.3468	88.004	103.845	105.197	91.4498	109.152	91.1863	95.2411	100.12	112.117	96.2827	93.7145	85.423	105.467	90.8714	91.7676	96.436	95.4036	97.2799	105.761	91.3644	99.4287	104.253	99.5949	99.9311	99.7589	108.345	121.805	107.567
	102.746	110.84	114.283	101.765	106.454	103.332	110.999	102.476	101.504	99.1537	103.625	103.483	116.505	116.251	130.237	116.441	107.568	105.645	108.064	95.3557	86.3468	88.004	101.205	107.01	92.6531	109.152	92.1668	95.2411	102.863	111.429	97.2085	94.5512	85.423	104.573	90.1204	91.7676	95.7472	95.4036	96.4413	104.966	92.1453	100.279	104.253	98.0508	100.671	101.904	109.256	122.874	106.623
	104.257	110.2	114.283	101.765	105.788	104.207	110.999	102.476	102.364	98.2356	104.454	103.483	115.602	116.251	130.237	118.893	107.568	105.645	109.366	93.6376	87.5544	87.0577	100.325	107.917	93.8564	107.852	93.1473	95.2411	105.606	111.429	98.1343	95.388	85.423	103.68	90.1204	91.7676	94.3695	96.0439	96.4413	104.171	92.9262	101.128	104.253	96.5067	101.412	102.977	110.166	122.874	106.623
	103.501	110.2	113.478	101.765	105.123	104.207	111.982	101.688	100.644	97.3176	104.454	104.196	114.699	116.251	129.326	120.118	107.568	105.645	111.97	93.6376	88.1582	88.004	97.6846	108.824	95.0597	106.553	94.1278	95.2411	106.978	110.741	99.0601	95.388	86.4648	101.892	90.1204	92.3306	93.6807	96.6842	96.4413	104.171	95.2688	100.279	104.253	94.9626	102.152	101.904	111.077	122.874	106.623
	105.012	109.559	113.478	102.536	104.458	103.332	112.964	100.9	99.7834	96.3995	105.283	107.765	114.699	116.251	129.326	121.344	107.568	105.645	113.272	94.4967	88.762	87.0577	95.9245	108.824	97.4662	105.253	93.1473	95.2411	106.978	111.429	99.9858	93.7145	88.5483	100.998	90.8714	91.7676	93.6807	97.3245	96.4413	104.966	96.8306	99.4287	105.246	93.4185	102.892	100.832	111.077	119.669	106.623
	104.257	110.2	113.478	102.536	104.458	103.332	112.964	100.111	100.644	96.3995	105.283	109.192	113.796	115.275	128.415	122.57	107.568	105.645	113.272	94.4967	87.5544	87.0577	95.9245	107.917	98.6695	103.954	92.1668	94.2279	108.349	110.741	99.9858	93.7145	89.59	100.998	90.1204	92.3306	94.3695	98.6051	98.1185	104.966	97.6115	97.7291	105.246	91.8744	102.892	100.832	111.987	117.532	106.623
	104.257	110.2	112.673	104.078	103.792	104.207	112.964	100.111	99.7834	98.2356	104.454	110.619	111.086	115.275	128.415	123.796	107.568	106.44	114.574	94.4967	86.3468	87.0577	95.9245	107.01	101.076	105.253	91.1863	93.2147	109.721	110.053	99.9858	92.8777	89.59	100.998	90.1204	92.8936	95.0583	99.2454	98.9571	106.557	97.6115	96.0294	105.246	91.1023	103.632	100.832	109.256	115.395	106.623
	104.257	110.2	111.868	104.849	103.792	103.332	112.964	99.323	100.644	99.1537	103.625	112.047	110.183	115.275	127.504	123.796	107.568	104.851	114.574	94.4967	86.3468	88.004	95.9245	106.104	102.279	105.253	90.2058	92.2015	108.349	109.365	99.9858	92.8777	88.5483	101.892	90.1204	92.8936	95.7472	99.2454	99.7958	106.557	96.8306	96.8793	105.246	90.3302	104.373	102.977	108.345	112.189	106.623
	105.012	109.559	111.868	104.849	103.792	103.332	112.964	100.111	103.224	100.072	103.625	111.333	110.183	115.275	127.504	123.796	107.568	104.851	115.876	92.7785	86.3468	88.9503	95.9245	106.104	104.686	105.253	90.2058	92.2015	108.349	108.678	99.9858	92.8777	86.4648	101.892	90.1204	93.4566	96.436	99.2454	99.7958	105.761	97.6115	96.8793	105.246	90.3302	105.113	102.977	107.435	108.984	106.623
	105.768	108.918	113.478	104.849	103.792	101.58	112.964	99.323	101.504	100.072	103.625	109.192	109.28	116.251	127.504	121.344	108.348	105.645	118.48	91.9195	86.3468	88.9503	95.9245	106.104	108.296	103.954	90.2058	93.2147	108.349	107.99	99.9858	92.8777	84.3813	100.998	89.3694	94.0196	97.1248	99.2454	100.634	104.171	96.8306	96.8793	105.246	91.8744	105.113	102.977	104.703	107.915	106.623
	106.523	108.278	115.087	104.849	103.792	101.58	111.982	99.323	102.364	100.99	103.625	107.051	108.377	118.205	127.504	118.893	109.127	106.44	121.084	91.9195	85.7429	88.9503	95.9245	106.104	110.702	102.654	90.2058	93.2147	108.349	107.302	100.912	92.041	82.2978	100.998	90.8714	94.0196	97.8136	99.8857	102.312	104.171	94.488	97.7291	104.253	92.6464	104.373	100.832	100.151	106.847	107.567
	106.523	106.996	113.478	103.307	104.458	101.58	111.982	98.5347	103.224	101.908	104.454	107.051	107.474	119.182	125.683	115.216	109.127	108.823	122.386	91.9195	85.7429	89.8966	95.9245	106.104	113.109	103.954	91.1863	93.2147	108.349	107.302	101.837	90.3675	80.2143	100.105	88.6184	93.4566	98.5025	100.526	103.15	104.171	93.7071	98.5789	104.253	94.1905	104.373	99.7589	96.5091	106.847	108.51
	106.523	106.996	114.283	102.536	104.458	100.704	111.982	96.1699	102.364	101.908	104.454	108.478	106.571	120.159	124.772	112.764	109.127	109.617	122.386	91.9195	85.1391	89.8966	95.9245	105.197	113.109	102.654	92.1668	94.2279	106.978	106.614	102.763	88.6941	79.1726	100.105	88.6184	93.4566	99.1913	101.166	102.312	104.171	91.3644	97.7291	104.253	95.7346	104.373	97.6135	91.0463	106.847	109.454
	107.279	106.996	113.478	102.536	105.123	101.58	110.999	94.5933	102.364	100.99	103.625	107.765	104.764	120.159	123.861	110.313	108.348	110.411	119.782	91.9195	84.5353	89.8966	96.8045	104.29	111.906	102.654	93.1473	95.2411	105.606	106.614	101.837	87.8573	79.1726	100.105	88.6184	93.4566	99.8801	100.526	102.312	105.761	90.5835	96.8793	104.253	97.2787	103.632	98.6862	90.1359	107.915	111.341
	107.279	106.996	114.283	101.765	105.788	101.58	110.999	95.3816	103.224	99.1537	102.796	109.192	103.861	119.182	122.951	107.861	108.348	108.028	118.48	91.9195	84.5353	90.8428	95.9245	104.29	110.702	105.253	94.1278	94.2279	105.606	107.302	101.837	87.8573	78.1308	100.998	90.8714	92.8936	99.8801	99.8857	101.473	104.171	89.8026	96.0294	103.26	98.8228	103.632	98.6862	89.2254	110.052	111.341
	108.034	106.996	115.087	101.765	106.454	102.456	110.017	95.3816	103.224	98.2356	101.967	110.619	102.958	119.182	122.951	105.41	108.348	107.234	115.876	91.9195	84.5353	88.9503	95.9245	103.383	109.499	103.954	94.1278	95.2411	104.235	107.99	100.912	87.8573	78.1308	100.998	93.1244	93.4566	99.8801	99.8857	101.473	104.966	89.8026	95.1796	103.26	100.367	103.632	98.6862	90.1359	113.258	112.284
	108.789	106.996	115.087	101.765	107.119	104.207	110.017	95.3816	104.945	98.2356	101.967	111.333	102.958	118.205	122.04	102.959	108.348	106.44	115.876	91.9195	85.1391	88.9503	95.9245	103.383	108.296	106.553	93.1473	96.2543	104.235	109.365	99.9858	87.8573	79.1726	101.892	93.8754	93.4566	99.8801	99.2454	100.634	104.171	90.5835	95.1796	102.267	101.139	104.373	98.6862	92.8672	115.395	113.228
	108.034	106.996	114.283	102.536	107.784	104.207	110.017	94.5933	104.945	99.1537	101.967	112.047	102.055	117.228	121.129	100.507	108.348	106.44	114.574	91.9195	85.7429	88.9503	96.8045	102.476	105.889	105.253	93.1473	97.2675	102.863	108.678	98.1343	88.6941	79.1726	100.998	94.6264	93.4566	99.8801	99.2454	100.634	103.376	91.3644	95.1796	101.275	101.139	104.373	97.6135	94.6882	117.532	113.228
	108.789	106.996	112.673	103.307	107.784	105.959	109.035	94.5933	105.805	100.072	102.796	112.76	101.152	116.251	121.129	100.507	108.348	107.234	114.574	91.9195	85.7429	88.9503	99.4447	102.476	104.686	105.253	92.1668	98.2807	101.492	109.365	98.1343	88.6941	78.1308	101.892	94.6264	92.8936	99.8801	99.8857	99.7958	102.581	90.5835	96.0294	101.275	101.139	105.113	96.5408	98.33	117.532	114.172
	108.034	106.356	111.868	103.307	107.784	106.834	108.053	94.5933	105.805	100.99	102.796	112.76	101.152	114.298	121.129	100.507	109.127	106.44	114.574	91.0604	85.7429	88.004	100.325	101.569	102.279	105.253	91.1863	98.2807	101.492	110.053	99.0601	89.5308	78.1308	101.892	93.8754	91.7676	99.8801	101.166	98.1185	101.785	90.5835	96.0294	101.275	101.911	105.113	96.5408	99.2405	117.532	115.115
	107.279	106.356	110.259	103.307	108.45	108.586	108.053	94.5933	105.805	100.99	102.796	112.76	102.055	114.298	120.218	101.733	109.127	105.645	114.574	91.9195	85.1391	88.004	102.085	101.569	101.076	105.253	91.1863	97.2675	100.12	109.365	99.0601	88.6941	77.0891	100.105	93.1244	90.6416	99.8801	101.807	98.1185	102.581	89.8026	96.0294	101.275	101.911	104.373	98.6862	100.151	117.532	115.115
	106.523	105.715	111.063	102.536	107.784	110.337	107.07	95.3816	105.805	100.072	101.138	112.047	102.958	113.321	119.308	104.184	109.907	104.851	114.574	91.0604	85.1391	88.004	103.845	101.569	101.076	105.253	89.2253	97.2675	101.492	109.365	99.9858	88.6941	77.0891	99.2107	93.1244	90.0787	99.1913	102.447	96.4413	103.376	89.0217	95.1796	101.275	101.911	103.632	100.832	101.972	117.532	114.172
	105.768	105.074	111.063	101.765	107.119	111.213	107.07	95.3816	104.945	100.99	101.138	112.047	102.958	113.321	117.486	106.636	109.907	104.851	115.876	91.0604	85.1391	88.9503	104.725	101.569	101.076	103.954	89.2253	98.2807	100.12	108.678	101.837	88.6941	79.1726	98.3169	90.8714	90.0787	99.1913	103.087	97.2799	102.581	89.0217	94.3298	100.282	104.227	102.892	102.977	103.793	118.6	114.172
	104.257	105.715	111.063	101.765	106.454	112.088	106.088	96.1699	105.805	100.99	101.138	110.619	102.055	114.298	117.486	106.636	109.907	103.262	115.876	89.3423	85.1391	89.8966	105.605	101.569	101.076	103.954	90.2058	99.294	100.12	109.365	102.763	88.6941	80.2143	97.4231	91.6224	90.6416	99.8801	103.087	98.1185	102.581	89.8026	94.3298	100.282	104.999	102.892	104.05	107.435	119.669	114.172
	103.501	105.715	110.259	102.536	106.454	112.964	105.106	96.1699	105.805	100.99	100.309	108.478	102.055	115.275	117.486	106.636	109.127	102.468	115.876	88.4832	85.7429	88.9503	106.485	101.569	101.076	102.654	91.1863	100.307	100.12	108.678	103.689	88.6941	80.2143	96.5294	90.8714	90.6416	99.8801	103.727	98.1185	102.581	90.5835	95.1796	99.2888	104.999	102.892	105.122	109.256	120.737	114.172
	103.501	105.715	110.259	103.307	105.788	114.716	103.141	96.9582	104.945	100.072	100.309	106.337	102.055	115.275	115.665	105.41	109.127	102.468	117.178	88.4832	86.3468	88.9503	105.605	101.569	101.076	102.654	91.1863	99.294	97.3772	108.678	103.689	88.6941	81.2561	96.5294	90.8714	90.6416	99.8801	103.727	97.2799	101.785	90.5835	95.1796	99.2888	105.771	102.892	106.195	110.166	120.737	114.172
	104.257	106.356	109.454	104.078	105.788	113.84	103.141	99.323	104.945	99.1537	100.309	104.91	102.055	115.275	115.665	105.41	108.348	100.879	119.782	87.6242	86.3468	88.004	105.605	101.569	101.076	101.355	91.1863	97.2675	96.0057	108.678	102.763	89.5308	82.2978	96.5294	91.6224	90.6416	99.8801	103.727	96.4413	100.99	89.8026	96.0294	99.2888	105.771	103.632	107.268	111.077	121.805	114.172
	103.501	106.356	109.454	104.849	105.788	113.84	104.123	99.323	105.805	99.1537	100.309	104.196	102.055	115.275	115.665	105.41	107.568	100.085	121.084	86.7651	86.3468	88.9503	105.605	101.569	101.076	101.355	91.1863	96.2543	94.6342	109.365	102.763	88.6941	81.2561	96.5294	90.8714	90.0787	100.569	104.368	94.764	100.99	89.8026	96.0294	100.282	106.543	103.632	109.413	109.256	121.805	114.172
	102.746	106.356	110.259	104.849	105.788	114.716	105.106	100.111	106.665	99.1537	100.309	103.483	101.152	115.275	114.754	102.959	107.568	100.085	123.688	86.7651	86.3468	88.9503	103.845	102.476	101.076	101.355	91.1863	94.2279	93.2627	108.678	100.912	89.5308	81.2561	96.5294	91.6224	89.5157	100.569	105.008	93.9254	101.785	89.0217	96.8793	101.275	107.315	104.373	110.486	107.435	121.805	114.172
	102.746	106.356	109.454	105.62	105.788	114.716	106.088	101.688	106.665	99.1537	100.309	102.769	101.152	115.275	113.843	102.959	107.568	99.2908	123.688	87.6242	86.3468	88.9503	102.085	102.476	101.076	101.355	92.1668	93.2147	93.2627	108.678	100.912	89.5308	82.2978	97.4231	90.1204	88.3897	100.569	105.008	93.9254	102.581	89.8026	96.8793	102.267	108.087	104.373	109.413	104.703	121.805	113.228
	101.99	106.996	109.454	105.62	105.788	113.84	107.07	100.9	106.665	96.3995	100.309	102.055	101.152	115.275	113.843	104.184	109.127	98.4965	122.386	85.9061	86.3468	89.8966	101.205	103.383	101.076	102.654	93.1473	94.2279	93.2627	107.99	99.0601	88.6941	81.2561	97.4231	89.3694	87.2637	100.569	105.008	93.9254	103.376	89.8026	97.7291	103.26	109.632	105.113	111.558	101.972	121.805	113.228
	102.746	107.637	109.454	105.62	105.123	112.964	108.053	100.9	105.805	95.4814	100.309	100.628	101.152	116.251	112.932	105.41	109.127	97.7021	121.084	86.7651	86.3468	90.8428	100.325	103.383	99.8728	102.654	95.1083	95.2411	93.2627	107.99	98.1343	88.6941	80.2143	97.4231	88.6184	86.7007	100.569	105.648	95.6027	102.581	89.8026	97.7291	104.253	110.404	105.113	113.704	99.2405	121.805	113.228
	102.746	106.996	109.454	104.849	105.123	114.716	109.035	100.9	104.084	94.5633	100.309	99.9142	102.055	117.228	112.932	107.861	108.348	97.7021	117.178	86.7651	86.9506	90.8428	98.5646	103.383	97.4662	102.654	96.0888	95.2411	91.8912	107.99	99.0601	88.6941	80.2143	97.4231	87.8674	86.1377	99.1913	105.648	98.1185	103.376	90.5835	98.5789	105.246	111.948	105.113	115.849	100.151	122.874	113.228
	103.501	106.996	109.454	104.078	105.123	115.591	109.035	100.9	104.084	95.4814	101.138	99.2006	102.055	117.228	112.022	110.313	108.348	98.4965	114.574	87.6242	87.5544	91.7891	98.5646	103.383	96.2629	102.654	96.0888	96.2543	93.2627	107.99	99.9858	90.3675	79.1726	97.4231	86.3654	86.1377	98.5025	105.008	100.634	101.785	90.5835	99.4287	106.239	113.492	104.373	116.922	99.2405	123.942	113.228
	104.257	106.996	110.259	103.307	105.123	116.467	107.07	100.111	104.945	97.3176	100.309	98.4869	102.958	116.251	112.022	112.764	108.348	97.7021	113.272	89.3423	88.1582	92.7354	98.5646	102.476	96.2629	103.954	95.1083	96.2543	94.6342	107.99	99.9858	90.3675	79.1726	96.5294	87.1164	86.1377	98.5025	104.368	103.15	101.785	90.5835	99.4287	106.239	114.264	104.373	117.994	100.151	125.011	113.228
	105.768	105.715	110.259	102.536	105.123	117.343	107.07	100.9	104.084	97.3176	100.309	98.4869	103.861	115.275	111.111	113.99	109.127	97.7021	111.97	88.4832	88.1582	92.7354	99.4447	101.569	97.4662	105.253	95.1083	95.2411	94.6342	107.302	99.0601	90.3675	79.1726	95.6356	87.1164	86.1377	98.5025	103.087	103.989	101.785	91.3644	98.5789	106.239	113.492	105.113	115.849	101.972	125.011	112.284
	105.768	106.996	111.063	101.765	104.458	118.218	107.07	100.9	103.224	98.2356	99.4796	98.4869	104.764	114.298	111.111	113.99	109.907	96.9078	110.668	88.4832	89.3659	93.6817	99.4447	101.569	98.6695	106.553	95.1083	95.2411	96.0057	107.99	98.1343	90.3675	79.1726	95.6356	87.1164	87.2637	97.8136	103.087	105.666	103.376	91.3644	98.5789	106.239	112.72	105.853	113.704	102.882	125.011	111.341
	107.279	106.356	110.259	101.765	103.792	119.094	106.088	101.688	103.224	99.1537	99.4796	97.7732	104.764	113.321	112.022	113.99	110.686	96.9078	110.668	88.4832	89.9697	94.628	101.205	100.662	101.076	107.852	94.1278	96.2543	98.7487	107.99	100.912	89.5308	79.1726	96.5294	87.8674	88.3897	97.8136	103.727	104.827	103.376	91.3644	97.7291	107.232	110.404	106.593	114.776	101.972	122.874	110.397
	107.279	106.356	108.649	102.536	102.462	118.218	107.07	101.688	102.364	100.99	99.4796	97.7732	104.764	112.344	112.932	113.99	110.686	96.1135	111.97	88.4832	90.5735	93.6817	102.965	100.662	102.279	107.852	93.1473	96.2543	98.7487	108.678	100.912	89.5308	80.2143	97.4231	87.1164	88.9527	97.1248	103.727	103.15	103.376	92.1453	97.7291	107.232	108.087	107.333	113.704	101.972	120.737	109.454
	106.523	107.637	109.454	102.536	103.127	118.218	107.07	101.688	102.364	102.826	99.4796	99.2006	103.861	111.367	113.843	113.99	109.907	97.7021	110.668	87.6242	90.5735	93.6817	104.725	100.662	103.483	107.852	92.1668	95.2411	96.0057	108.678	101.837	87.8573	82.2978	97.4231	85.6144	89.5157	97.8136	103.727	100.634	104.171	92.1453	97.7291	108.225	104.999	108.074	111.558	100.151	117.532	109.454
	106.523	108.278	109.454	101.765	103.127	118.218	107.07	100.9	101.504	102.826	100.309	100.628	102.958	111.367	116.575	112.764	109.127	97.7021	109.366	88.4832	89.9697	93.6817	105.605	101.569	103.483	106.553	92.1668	95.2411	94.6342	108.678	102.763	86.1839	82.2978	97.4231	86.3654	89.5157	98.5025	103.727	98.9571	103.376	91.3644	97.7291	108.225	102.683	108.074	111.558	98.33	113.258	109.454
	106.523	108.918	109.454	101.765	103.127	117.343	108.053	100.111	102.364	104.662	101.138	101.342	102.958	111.367	118.397	112.764	108.348	98.4965	110.668	89.3423	88.762	94.628	105.605	101.569	103.483	106.553	93.1473	95.2411	94.6342	108.678	102.763	84.5104	83.3396	97.4231	86.3654	90.0787	98.5025	103.727	97.2799	103.376	92.1453	96.8793	107.232	101.139	108.074	111.558	97.4196	110.052	110.397
	106.523	109.559	110.259	101.765	103.792	115.591	110.017	99.323	103.224	105.58	101.967	102.055	102.958	112.344	119.308	110.313	108.348	99.2908	113.272	89.3423	87.5544	95.5742	106.485	101.569	101.076	105.253	92.1668	95.2411	94.6342	107.99	103.689	83.6736	83.3396	100.105	85.6144	90.0787	98.5025	103.087	96.4413	103.376	91.3644	96.8793	106.239	99.5949	107.333	109.413	97.4196	106.847	111.341
	108.034	109.559	111.063	101.765	103.792	114.716	110.999	98.5347	104.084	104.662	101.967	102.055	102.958	113.321	120.218	107.861	109.127	100.085	113.272	89.3423	86.9506	95.5742	107.365	101.569	101.076	105.253	91.1863	96.2543	94.6342	107.302	104.615	82.8369	83.3396	100.998	87.8674	90.6416	99.1913	103.727	97.2799	103.376	90.5835	96.8793	105.246	98.8228	106.593	108.34	97.4196	104.71	112.284
	107.279	109.559	111.063	101.765	103.127	112.088	111.982	98.5347	104.945	103.744	101.967	102.055	103.861	113.321	120.218	106.636	109.127	100.085	113.272	89.3423	86.3468	95.5742	105.605	101.569	99.8728	102.654	89.2253	96.2543	93.2627	107.302	104.615	82.8369	83.3396	100.998	87.1164	91.2046	99.1913	103.087	98.1185	101.785	90.5835	97.7291	105.246	98.0508	105.853	107.268	98.33	103.641	114.172
	108.034	109.559	109.454	101.765	103.127	110.337	111.982	99.323	105.805	102.826	101.967	102.055	103.861	113.321	120.218	106.636	109.127	100.879	113.272	88.4832	86.3468	95.5742	105.605	101.569	99.8728	103.954	88.2448	96.2543	94.6342	107.302	105.541	84.5104	83.3396	100.105	87.8674	91.7676	99.8801	101.807	98.9571	101.785	89.8026	98.5789	104.253	98.0508	105.113	106.195	99.2405	102.573	117.002
	108.034	109.559	107.844	101.765	104.458	110.337	111.982	100.9	105.805	101.908	101.967	101.342	103.861	114.298	120.218	107.861	108.348	102.468	111.97	89.3423	85.7429	94.628	104.725	101.569	98.6695	103.954	87.2643	96.2543	96.0057	107.302	105.541	84.5104	83.3396	98.3169	87.1164	92.3306	99.8801	101.166	98.9571	101.785	89.8026	98.5789	104.253	98.0508	104.373	105.122	100.151	102.573	117.946
	108.034	110.2	106.235	100.994	104.458	108.586	111.982	101.688	104.084	102.826	101.138	101.342	103.861	117.228	121.129	107.861	107.568	103.262	113.272	89.3423	86.3468	93.6817	103.845	101.569	97.4662	103.954	88.2448	96.2543	97.3772	107.302	106.466	83.6736	83.3396	97.4231	86.3654	92.3306	99.8801	100.526	98.9571	102.581	89.0217	98.5789	104.253	98.8228	104.373	105.122	98.33	102.573	118.889
	108.789	109.559	106.235	101.765	104.458	109.461	111.982	102.476	104.084	102.826	100.309	101.342	102.958	119.182	123.861	105.41	106.789	104.851	114.574	89.3423	86.3468	93.6817	102.965	101.569	97.4662	103.954	91.1863	97.2675	97.3772	107.99	107.392	84.5104	84.3813	96.5294	87.1164	92.8936	100.569	100.526	99.7958	103.376	88.2408	98.5789	104.253	99.5949	103.632	104.05	99.2405	103.641	118.889
	108.789	109.559	107.039	101.765	104.458	110.337	111.982	103.264	104.084	101.908	99.4796	101.342	102.958	121.136	125.683	104.184	106.789	105.645	113.272	89.3423	86.3468	93.6817	102.085	102.476	97.4662	103.954	93.1473	97.2675	96.0057	106.614	108.318	84.5104	86.4648	97.4231	87.1164	93.4566	99.8801	99.8857	99.7958	102.581	87.4599	99.4287	103.26	101.139	103.632	105.122	98.33	104.71	117.946
	108.789	108.918	107.844	101.765	104.458	111.213	112.964	103.264	104.945	101.908	99.4796	100.628	102.055	120.159	126.594	105.41	106.789	104.851	111.97	88.4832	86.9506	93.6817	102.965	103.383	97.4662	105.253	94.1278	98.2807	96.0057	107.302	107.392	85.3471	88.5483	99.2107	86.3654	93.4566	99.8801	99.8857	101.473	102.581	87.4599	99.4287	102.267	101.911	103.632	106.195	98.33	105.778	117.946
	106.523	108.278	108.649	101.765	103.792	111.213	112.964	103.264	105.805	100.99	100.309	99.9142	101.152	118.205	126.594	106.636	106.789	104.851	110.668	87.6242	88.1582	93.6817	104.725	104.29	98.6695	106.553	95.1083	97.2675	97.3772	106.614	108.318	86.1839	89.59	100.998	86.3654	93.4566	99.8801	99.8857	103.989	103.376	86.679	98.5789	101.275	101.911	103.632	106.195	97.4196	106.847	116.059
	106.523	108.278	109.454	101.765	104.458	112.088	111.982	103.264	106.665	100.99	100.309	99.9142	101.152	117.228	124.772	107.861	106.789	104.851	110.668	87.6242	88.762	93.6817	106.485	104.29	99.8728	105.253	95.1083	97.2675	100.12	105.926	108.318	85.3471	89.59	101.892	87.1164	93.4566	99.1913	99.8857	107.343	102.581	87.4599	98.5789	99.2888	101.139	103.632	106.195	96.5091	106.847	115.115
	106.523	108.278	109.454	100.994	104.458	112.088	110.017	103.264	106.665	100.072	101.138	100.628	101.152	116.251	123.861	107.861	107.568	104.057	110.668	86.7651	89.3659	93.6817	108.245	104.29	101.076	105.253	95.1083	97.2675	100.12	105.238	109.244	83.6736	88.5483	101.892	87.1164	92.8936	99.1913	100.526	109.021	103.376	87.4599	97.7291	99.2888	100.367	104.373	107.268	97.4196	106.847	114.172
	105.012	107.637	109.454	100.994	104.458	108.586	109.035	103.264	107.525	100.99	101.967	102.055	100.249	116.251	121.129	107.861	107.568	105.645	110.668	87.6242	89.3659	93.6817	109.125	105.197	103.483	105.253	96.0888	96.2543	100.12	105.238	110.17	82.0002	87.5065	100.998	87.1164	91.7676	98.5025	100.526	109.859	102.581	86.679	97.7291	100.282	99.5949	105.113	109.413	96.5091	105.778	113.228
	105.768	107.637	110.259	100.994	104.458	108.586	107.07	103.264	107.525	101.908	101.967	102.769	100.249	114.298	121.129	107.861	108.348	108.028	109.366	88.4832	88.762	93.6817	110.005	105.197	104.686	105.253	97.0693	95.2411	101.492	104.551	112.021	82.0002	85.423	101.892	87.8674	91.7676	98.5025	100.526	109.021	102.581	86.679	96.8793	101.275	98.0508	105.853	108.34	98.33	106.847	113.228
	105.012	107.637	111.063	100.994	105.123	109.461	107.07	101.688	107.525	102.826	101.138	103.483	100.249	112.344	119.308	107.861	109.127	109.617	108.064	89.3423	88.1582	94.628	110.005	104.29	103.483	105.253	97.0693	94.2279	100.12	103.863	112.947	81.1634	84.3813	103.68	88.6184	91.7676	99.1913	100.526	108.182	102.581	85.8981	96.0294	101.275	97.2787	105.853	110.486	98.33	106.847	112.284
	104.257	108.278	111.063	102.536	105.123	108.586	106.088	100.9	106.665	103.744	100.309	103.483	100.249	112.344	118.397	109.087	108.348	111.206	106.762	89.3423	87.5544	95.5742	110.005	103.383	103.483	103.954	96.0888	93.2147	98.7487	103.863	112.947	82.8369	84.3813	105.467	88.6184	91.7676	99.8801	100.526	107.343	102.581	85.8981	95.1796	101.275	96.5067	105.853	110.486	100.151	106.847	112.284
	105.012	108.278	111.868	103.307	105.788	108.586	105.106	100.9	107.525	102.826	100.309	103.483	101.152	111.367	118.397	109.087	108.348	110.411	105.46	89.3423	86.3468	96.5205	109.125	101.569	103.483	102.654	96.0888	93.2147	97.3772	102.487	111.095	83.6736	83.3396	106.361	88.6184	91.7676	99.1913	101.166	105.666	102.581	85.8981	95.1796	100.282	94.9626	105.113	110.486	101.061	107.915	113.228
	104.257	108.278	111.063	104.078	107.119	110.337	103.141	100.9	108.385	100.99	100.309	103.483	101.152	112.344	117.486	107.861	107.568	108.823	106.762	88.4832	85.7429	97.4668	109.125	100.662	102.279	101.355	96.0888	93.2147	97.3772	102.487	111.095	82.8369	83.3396	104.573	87.8674	91.2046	99.1913	100.526	103.15	101.785	85.8981	96.0294	99.2888	94.1905	104.373	111.558	101.061	108.984	114.172
	102.746	108.278	111.063	104.078	107.784	109.461	102.159	102.476	109.246	100.072	100.309	102.769	101.152	112.344	117.486	109.087	106.789	108.028	108.064	89.3423	86.3468	96.5205	109.125	100.662	102.279	101.355	97.0693	93.2147	97.3772	102.487	112.021	82.8369	83.3396	103.68	87.8674	90.6416	98.5025	100.526	100.634	100.99	85.8981	96.0294	98.2959	94.1905	102.892	111.558	101.061	110.052	113.228
	102.746	107.637	111.063	104.078	108.45	108.586	103.141	103.264	109.246	100.072	100.309	101.342	102.055	111.367	115.665	107.861	105.23	108.028	110.668	88.4832	87.5544	95.5742	108.245	101.569	101.076	98.7561	98.0498	93.2147	97.3772	103.175	112.021	83.6736	83.3396	102.786	88.6184	90.6416	97.8136	101.166	98.1185	100.99	86.679	96.0294	98.2959	95.7346	102.152	111.558	100.151	112.189	112.284
	102.746	106.996	112.673	103.307	108.45	110.337	104.123	102.476	109.246	100.99	101.138	101.342	102.958	110.39	113.843	106.636	104.45	108.028	110.668	89.3423	88.762	93.6817	108.245	101.569	101.076	100.056	98.0498	93.2147	97.3772	103.175	111.095	85.3471	82.2978	102.786	88.6184	90.6416	97.8136	101.807	95.6027	101.785	86.679	96.8793	98.2959	98.0508	101.412	111.558	100.151	114.326	112.284
	102.746	107.637	112.673	103.307	108.45	110.337	106.088	102.476	109.246	101.908	101.138	102.055	102.958	109.413	112.022	105.41	104.45	109.617	110.668	87.6242	88.762	91.7891	106.485	102.476	102.279	100.056	97.0693	93.2147	97.3772	103.175	112.947	86.1839	82.2978	102.786	89.3694	91.2046	97.8136	103.087	93.9254	101.785	86.679	96.8793	99.2888	99.5949	100.671	111.558	98.33	115.395	112.284
	101.99	107.637	111.868	103.307	108.45	109.461	108.053	102.476	108.385	102.826	101.967	101.342	102.055	107.459	111.111	105.41	105.23	111.206	110.668	87.6242	89.3659	90.8428	104.725	102.476	102.279	100.056	97.0693	94.2279	97.3772	102.487	113.873	87.0206	83.3396	101.892	89.3694	91.2046	97.8136	103.727	92.2482	102.581	85.8981	97.7291	99.2888	101.911	100.671	108.34	98.33	115.395	112.284
	102.746	106.996	111.063	103.307	107.784	110.337	109.035	101.688	106.665	102.826	101.967	101.342	102.958	106.482	110.2	106.636	106.789	112.794	111.97	86.7651	89.3659	90.8428	102.085	101.569	102.279	98.7561	96.0888	94.2279	97.3772	101.111	114.799	88.6941	83.3396	100.998	89.3694	91.7676	99.1913	104.368	92.2482	101.785	87.4599	97.7291	99.2888	103.455	100.671	107.268	98.33	115.395	112.284
	102.746	106.996	111.063	103.307	107.784	109.461	110.999	101.688	106.665	101.908	101.967	100.628	102.958	105.506	110.2	106.636	107.568	113.589	113.272	86.7651	88.762	92.7354	99.4447	99.7555	102.279	97.4567	94.1278	95.2411	96.0057	102.487	114.799	89.5308	83.3396	100.105	90.1204	91.7676	100.569	104.368	92.2482	102.581	89.0217	96.8793	99.2888	104.227	100.671	106.195	98.33	114.326	113.228
	102.746	106.356	111.868	102.536	107.119	107.71	110.017	101.688	106.665	100.99	101.967	99.2006	102.055	105.506	110.2	107.861	107.568	115.177	114.574	86.7651	89.3659	93.6817	97.6846	98.8486	102.279	97.4567	94.1278	95.2411	96.0057	102.487	113.873	90.3675	82.2978	100.105	89.3694	91.2046	101.258	104.368	93.9254	101.785	91.3644	96.0294	100.282	104.999	101.412	105.122	99.2405	113.258	114.172
	104.257	106.356	113.478	102.536	107.119	109.461	110.017	102.476	107.525	100.99	101.967	97.7732	101.152	104.529	109.289	110.313	107.568	115.972	113.272	87.6242	89.9697	93.6817	94.1644	98.8486	102.279	97.4567	94.1278	95.2411	96.0057	102.487	112.021	90.3675	81.2561	100.998	88.6184	90.6416	102.635	104.368	94.764	100.99	92.9262	96.0294	100.282	106.543	101.412	104.05	100.151	113.258	115.115
	104.257	105.715	114.283	103.307	107.784	109.461	109.035	103.264	107.525	100.99	101.967	97.7732	102.055	103.552	108.379	111.539	108.348	117.56	111.97	87.6242	89.9697	93.6817	92.4043	99.7555	101.076	97.4567	95.1083	95.2411	97.3772	102.487	112.021	90.3675	82.2978	100.998	87.8674	91.2046	103.324	105.008	95.6027	99.3999	91.3644	96.0294	101.275	107.315	102.892	105.122	99.2405	112.189	116.059
	103.501	105.715	114.283	103.307	108.45	110.337	108.053	104.841	107.525	100.99	101.967	97.7732	102.055	102.575	108.379	109.087	108.348	118.355	111.97	87.6242	89.9697	92.7354	91.5243	100.662	99.8728	97.4567	96.0888	96.2543	98.7487	103.175	112.947	89.5308	84.3813	102.786	87.8674	91.7676	104.013	104.368	96.4413	99.3999	89.0217	96.0294	101.275	107.315	103.632	104.05	99.2405	111.121	116.059
	102.746	105.715	113.478	104.078	109.115	111.213	107.07	105.629	108.385	101.908	101.967	98.4869	102.958	103.552	108.379	107.861	109.127	118.355	111.97	88.4832	89.9697	92.7354	92.4043	100.662	99.8728	98.7561	97.0693	95.2411	100.12	102.487	112.947	89.5308	85.423	102.786	87.8674	91.7676	104.702	103.727	97.2799	97.8095	86.679	95.1796	100.282	107.315	104.373	104.05	98.33	110.052	116.059
	102.746	105.715	112.673	104.078	109.115	112.088	107.07	106.418	108.385	101.908	101.967	98.4869	102.958	107.459	108.379	105.41	109.127	117.56	113.272	89.3423	89.3659	92.7354	93.2844	100.662	99.8728	98.7561	98.0498	95.2411	100.12	103.175	112.947	88.6941	86.4648	103.68	88.6184	92.3306	104.702	103.727	97.2799	98.6047	86.679	94.3298	99.2888	106.543	104.373	105.122	95.5986	107.915	115.115
	103.501	105.715	111.868	103.307	108.45	110.337	108.053	105.629	108.385	102.826	101.138	99.2006	102.958	111.367	109.289	102.959	109.127	117.56	114.574	91.0604	88.762	91.7891	93.2844	100.662	101.076	98.7561	97.0693	94.2279	100.12	103.175	112.021	87.8573	85.423	103.68	88.6184	92.8936	104.702	103.727	96.4413	97.8095	87.4599	93.48	98.2959	104.999	105.113	105.122	94.6882	105.778	115.115
	102.746	106.356	111.063	102.536	107.784	109.461	109.035	104.841	108.385	103.744	100.309	99.2006	103.861	112.344	109.289	101.733	109.127	117.56	115.876	91.9195	88.762	91.7891	95.0445	99.7555	102.279	97.4567	97.0693	93.2147	101.492	103.863	112.021	87.8573	84.3813	103.68	88.6184	93.4566	104.702	102.447	95.6027	97.8095	89.0217	91.7804	97.303	102.683	105.113	105.122	94.6882	103.641	115.115
	102.746	105.715	108.649	101.765	107.119	108.586	109.035	104.053	108.385	102.826	100.309	99.2006	102.958	113.321	108.379	101.733	109.127	116.766	118.48	93.6376	88.762	91.7891	95.0445	99.7555	102.279	96.1573	97.0693	92.2015	101.492	103.863	111.095	88.6941	83.3396	103.68	88.6184	94.0196	104.013	100.526	95.6027	96.2191	90.5835	90.0807	97.303	100.367	105.113	105.122	93.7777	103.641	114.172
	102.746	105.715	107.844	100.994	105.788	108.586	110.017	102.476	107.525	101.908	100.309	98.4869	103.861	113.321	107.468	102.959	109.127	115.177	118.48	93.6376	88.762	91.7891	94.1644	98.8486	103.483	96.1573	98.0498	92.2015	100.12	105.238	111.095	88.6941	82.2978	104.573	87.8674	94.5826	104.013	99.8857	95.6027	96.2191	91.3644	89.2309	98.2959	99.5949	105.853	106.195	96.5091	103.641	114.172
	103.501	104.433	106.235	100.994	104.458	108.586	110.017	101.688	107.525	100.99	100.309	97.7732	103.861	113.321	107.468	104.184	109.127	114.383	118.48	93.6376	88.762	91.7891	92.4043	98.8486	103.483	97.4567	100.991	92.2015	98.7487	104.551	110.17	88.6941	81.2561	104.573	88.6184	95.1456	103.324	99.2454	93.9254	95.4239	91.3644	88.3811	98.2959	98.8228	106.593	104.05	97.4196	103.641	114.172
	103.501	103.793	104.625	100.994	104.458	108.586	110.017	100.9	107.525	100.072	100.309	97.0596	103.861	113.321	107.468	106.636	109.907	112.794	117.178	93.6376	88.1582	91.7891	91.5243	98.8486	102.279	97.4567	102.952	92.2015	97.3772	104.551	110.17	87.8573	80.2143	103.68	89.3694	95.1456	104.013	98.6051	93.9254	96.2191	89.8026	87.5313	98.2959	98.0508	106.593	104.05	99.2405	104.71	115.115
	104.257	104.433	103.82	101.765	103.127	108.586	110.017	100.111	109.246	100.99	99.4796	97.0596	104.764	114.298	107.468	107.861	109.907	112	117.178	94.4967	87.5544	92.7354	90.6443	98.8486	103.483	96.1573	102.952	92.2015	94.6342	104.551	110.17	88.6941	80.2143	103.68	87.8674	96.2716	103.324	98.6051	93.9254	96.2191	89.0217	87.5313	97.303	96.5067	106.593	101.904	99.2405	105.778	116.059
	105.012	104.433	103.015	102.536	102.462	110.337	110.017	100.111	109.246	100.99	99.4796	97.7732	103.861	115.275	108.379	110.313	109.907	112	115.876	94.4967	87.5544	92.7354	90.6443	98.8486	104.686	97.4567	102.952	92.2015	93.2627	103.863	109.244	89.5308	79.1726	103.68	87.8674	96.2716	102.635	99.2454	93.9254	97.0143	87.4599	87.5313	97.303	94.9626	105.853	99.7589	101.061	104.71	117.946
	104.257	105.074	103.015	103.307	103.127	110.337	109.035	100.9	110.106	100.99	99.4796	99.2006	102.958	116.251	109.289	111.539	109.127	112.794	113.272	94.4967	88.1582	92.7354	90.6443	98.8486	105.889	97.4567	102.952	92.2015	93.2627	103.863	109.244	89.5308	79.1726	103.68	86.3654	96.2716	101.947	99.2454	94.764	97.0143	88.2408	87.5313	97.303	93.4185	105.853	98.6862	101.972	104.71	119.833
	105.012	105.074	104.625	103.307	103.127	111.213	109.035	100.9	110.106	101.908	100.309	100.628	102.958	116.251	110.2	112.764	109.127	115.177	111.97	94.4967	88.1582	91.7891	92.4043	98.8486	107.093	97.4567	103.933	93.2147	91.8912	103.175	109.244	89.5308	79.1726	104.573	87.1164	95.7086	101.947	99.2454	96.4413	97.0143	88.2408	87.5313	97.303	92.6464	106.593	98.6862	102.882	102.573	121.72
	105.768	105.074	105.43	103.307	102.462	112.088	109.035	101.688	110.966	102.826	101.138	102.055	102.055	115.275	111.111	111.539	108.348	115.972	110.668	94.4967	88.1582	93.6817	92.4043	98.8486	108.296	96.1573	102.952	94.2279	91.8912	103.175	108.318	87.8573	80.2143	105.467	87.8674	95.7086	101.258	99.8857	96.4413	97.8095	89.0217	88.3811	98.2959	93.4185	106.593	98.6862	103.793	101.505	121.72
	105.768	105.074	105.43	103.307	102.462	112.964	107.07	100.9	110.106	103.744	101.138	102.055	102.055	115.275	111.111	109.087	108.348	115.177	106.762	94.4967	87.5544	94.628	92.4043	98.8486	109.499	97.4567	100.991	94.2279	91.8912	103.863	108.318	87.0206	81.2561	105.467	87.1164	95.7086	100.569	99.8857	97.2799	97.0143	90.5835	89.2309	98.2959	96.5067	107.333	99.7589	105.614	100.436	122.664
	105.012	104.433	106.235	102.536	101.796	113.84	106.088	100.9	109.246	103.744	101.138	102.055	102.055	115.275	111.111	107.861	107.568	115.972	105.46	96.2148	88.1582	96.5205	92.4043	98.8486	110.702	97.4567	99.0303	94.2279	91.8912	103.863	109.244	85.3471	82.2978	105.467	87.1164	95.7086	100.569	99.2454	97.2799	97.8095	91.3644	90.0807	99.2888	97.2787	107.333	101.904	105.614	100.436	124.551
	105.768	104.433	107.844	103.307	101.796	114.716	107.07	100.9	110.106	103.744	100.309	102.055	102.055	116.251	112.022	106.636	106.789	115.972	105.46	97.0738	88.762	97.4668	92.4043	98.8486	110.702	96.1573	99.0303	94.2279	91.8912	103.863	110.17	84.5104	82.2978	106.361	88.6184	95.7086	100.569	99.2454	97.2799	98.6047	92.9262	90.9305	100.282	98.0508	108.814	100.832	105.614	99.3676	126.438
	106.523	105.715	108.649	103.307	101.796	114.716	107.07	101.688	110.966	104.662	99.4796	101.342	102.055	116.251	112.022	106.636	106.789	115.972	104.158	98.792	88.762	97.4668	91.5243	98.8486	111.906	96.1573	98.0498	95.2411	93.2627	104.551	111.095	84.5104	83.3396	106.361	88.6184	95.1456	100.569	99.2454	97.2799	98.6047	92.9262	91.7804	99.2888	97.2787	110.294	100.832	107.435	100.436	129.269
	105.768	105.715	108.649	103.307	101.796	113.84	106.088	102.476	110.106	104.662	98.6506	101.342	102.958	116.251	112.932	107.861	107.568	115.972	101.554	100.51	88.762	97.4668	91.5243	99.7555	113.109	96.1573	98.0498	95.2411	93.2627	105.238	112.021	83.6736	85.423	107.255	88.6184	94.5826	101.258	99.2454	97.2799	99.3999	92.9262	92.6302	98.2959	98.0508	111.775	99.7589	108.345	101.505	130.212
	105.768	105.715	108.649	103.307	101.796	112.964	105.106	101.688	110.106	103.744	98.6506	101.342	102.958	117.228	112.932	107.861	107.568	115.177	101.554	101.369	88.762	97.4668	90.6443	100.662	111.906	94.8579	98.0498	95.2411	93.2627	105.238	113.873	84.5104	84.3813	107.255	88.6184	95.1456	102.635	99.2454	97.2799	99.3999	92.1453	93.48	97.303	98.8228	111.775	98.6862	109.256	103.641	131.156
	105.012	106.356	108.649	103.307	101.796	111.213	104.123	100.9	109.246	102.826	98.6506	102.055	102.055	118.205	112.932	109.087	108.348	115.177	102.856	102.228	88.1582	97.4668	90.6443	99.7555	110.702	96.1573	98.0498	95.2411	93.2627	104.551	113.873	86.1839	84.3813	107.255	89.3694	95.7086	103.324	99.2454	96.4413	100.195	89.8026	95.1796	96.3101	99.5949	112.515	97.6135	111.077	104.71	131.156
	103.501	106.356	109.454	104.078	101.796	112.964	103.141	99.323	108.385	101.908	97.8216	102.769	102.055	117.228	112.932	107.861	108.348	114.383	102.856	102.228	87.5544	97.4668	90.6443	99.7555	108.296	96.1573	98.0498	95.2411	91.8912	105.238	113.873	87.0206	84.3813	107.255	88.6184	96.2716	103.324	99.2454	97.2799	100.99	89.0217	96.0294	96.3101	99.5949	113.255	96.5408	111.987	105.778	131.156
	102.746	105.715	107.844	104.078	102.462	112.964	103.141	97.7465	106.665	100.99	97.8216	102.769	102.958	115.275	113.843	105.41	109.127	113.589	101.554	101.369	86.9506	97.4668	90.6443	98.8486	108.296	93.5585	98.0498	96.2543	91.8912	106.614	112.947	87.0206	84.3813	106.361	88.6184	96.8346	104.013	98.6051	97.2799	101.785	88.2408	97.7291	98.2959	97.2787	113.255	95.4682	111.987	105.778	132.099
	101.235	105.074	109.454	104.078	103.127	112.964	104.123	96.9582	106.665	100.99	96.9926	102.055	102.958	115.275	113.843	104.184	109.127	113.589	101.554	100.51	86.3468	97.4668	91.5243	99.7555	108.296	93.5585	98.0498	96.2543	91.8912	106.614	112.947	87.8573	84.3813	105.467	88.6184	96.8346	104.702	98.6051	97.2799	100.99	87.4599	98.5789	100.282	94.9626	112.515	94.3955	111.987	105.778	132.099
	101.235	104.433	108.649	104.078	104.458	112.088	105.106	96.9582	107.525	100.99	96.9926	102.055	102.055	114.298	115.665	101.733	110.686	112	101.554	101.369	86.3468	97.4668	92.4043	99.7555	109.499	92.259	96.0888	96.2543	93.2627	105.238	111.095	87.0206	85.423	105.467	87.8674	97.3975	104.013	98.6051	96.4413	100.99	86.679	98.5789	101.275	93.4185	112.515	93.3228	111.987	104.71	131.156
	101.235	104.433	109.454	104.849	105.123	110.337	104.123	97.7465	108.385	100.99	96.1636	101.342	102.055	113.321	115.665	100.507	111.466	111.206	101.554	100.51	86.3468	98.4131	91.5243	99.7555	109.499	92.259	95.1083	96.2543	91.8912	105.238	112.947	88.6941	86.4648	105.467	88.6184	97.9605	103.324	98.6051	96.4413	101.785	87.4599	98.5789	102.267	91.8744	111.775	92.2501	111.077	103.641	130.212
	101.235	104.433	109.454	104.849	104.458	110.337	104.123	97.7465	108.385	100.99	95.3346	101.342	102.958	114.298	114.754	100.507	112.245	110.411	101.554	99.651	86.3468	98.4131	92.4043	98.8486	108.296	93.5585	93.1473	97.2675	91.8912	105.926	112.947	87.8573	86.4648	105.467	88.6184	97.9605	103.324	99.2454	96.4413	101.785	88.2408	98.5789	103.26	90.3302	111.035	93.3228	111.987	103.641	128.325
	100.479	103.793	108.649	105.62	103.792	109.461	104.123	98.5347	107.525	101.908	95.3346	100.628	102.958	114.298	114.754	99.2816	111.466	110.411	102.856	98.792	86.9506	98.4131	90.6443	99.7555	107.093	93.5585	93.1473	97.2675	90.5197	107.302	112.947	87.8573	85.423	103.68	88.6184	97.9605	103.324	98.6051	95.6027	101.785	87.4599	98.5789	103.26	89.5582	109.554	94.3955	111.987	103.641	127.381
	101.99	104.433	107.844	106.391	103.127	110.337	104.123	97.7465	107.525	101.908	95.3346	99.9142	102.055	115.275	113.843	99.2816	109.907	111.206	104.158	97.9329	87.5544	99.3594	89.7642	100.662	105.889	94.8579	92.1668	99.294	89.1482	106.614	112.947	87.8573	85.423	102.786	89.3694	98.5235	103.324	98.6051	95.6027	100.99	88.2408	98.5789	101.275	90.3302	108.074	95.4682	112.897	103.641	125.494
	102.746	105.074	109.454	105.62	103.127	110.337	105.106	96.1699	107.525	102.826	96.1636	99.2006	102.055	116.251	113.843	99.2816	109.127	109.617	104.158	96.2148	86.9506	99.3594	88.8842	100.662	104.686	94.8579	90.2058	100.307	87.7767	107.302	112.947	87.8573	85.423	103.68	90.1204	98.5235	102.635	98.6051	95.6027	100.99	89.0217	97.7291	99.2888	91.1023	107.333	95.4682	112.897	103.641	124.551
	104.257	104.433	109.454	105.62	103.792	110.337	107.07	95.3816	108.385	103.744	96.1636	98.4869	102.055	116.251	113.843	100.507	108.348	109.617	104.158	95.3557	85.1391	100.306	88.0041	100.662	103.483	94.8579	90.2058	101.32	87.7767	108.678	112.947	87.8573	84.3813	105.467	89.3694	99.0865	102.635	98.6051	95.6027	100.195	89.0217	96.8793	98.2959	91.8744	108.074	95.4682	112.897	102.573	123.607
	104.257	104.433	110.259	105.62	103.792	110.337	108.053	94.5933	108.385	102.826	96.1636	97.7732	101.152	115.275	113.843	101.733	107.568	109.617	105.46	95.3557	83.3276	100.306	88.8842	101.569	102.279	93.5585	90.2058	102.334	87.7767	108.678	111.095	87.0206	83.3396	107.255	88.6184	98.5235	102.635	99.8857	96.4413	99.3999	89.0217	95.1796	98.2959	91.8744	108.814	96.5408	114.718	103.641	122.664
	103.501	103.793	109.454	105.62	104.458	110.337	108.053	94.5933	108.385	103.744	96.1636	97.7732	100.249	115.275	112.022	104.184	107.568	108.028	105.46	94.4967	82.12	101.252	88.0041	101.569	102.279	96.1573	91.1863	102.334	87.7767	107.99	109.244	86.1839	81.2561	108.149	89.3694	98.5235	103.324	100.526	96.4413	100.195	89.8026	94.3298	99.2888	92.6464	109.554	95.4682	115.629	103.641	122.664
	102.746	103.793	108.649	106.391	104.458	109.461	107.07	96.1699	108.385	103.744	96.1636	97.0596	98.4423	115.275	112.022	104.184	108.348	108.823	106.762	94.4967	82.12	101.252	88.8842	101.569	101.076	97.4567	91.1863	101.32	89.1482	108.678	108.318	85.3471	79.1726	108.149	89.3694	97.9605	103.324	101.807	96.4413	100.99	89.0217	92.6302	100.282	93.4185	109.554	96.5408	118.36	103.641	121.72
	102.746	103.152	107.844	107.162	104.458	108.586	106.088	97.7465	106.665	103.744	96.1636	95.6322	98.4423	115.275	111.111	104.184	108.348	109.617	106.762	93.6376	83.3276	102.198	88.0041	101.569	99.8728	97.4567	91.1863	101.32	89.1482	109.365	106.466	86.1839	78.1308	107.255	89.3694	97.9605	102.635	103.087	96.4413	101.785	89.0217	92.6302	100.282	94.1905	110.294	98.6862	118.36	104.71	120.776
	102.746	102.511	107.844	107.933	104.458	106.834	105.106	99.323	105.805	103.744	96.9926	95.6322	98.4423	114.298	112.022	104.184	108.348	108.823	105.46	92.7785	85.1391	104.091	87.1241	101.569	99.8728	98.7561	91.1863	101.32	90.5197	108.678	105.541	86.1839	78.1308	106.361	89.3694	97.3975	102.635	103.727	96.4413	103.376	89.8026	93.48	99.2888	94.1905	110.294	97.6135	118.36	104.71	119.833
	101.99	102.511	107.844	107.933	105.123	105.959	105.106	100.111	104.945	103.744	97.8216	95.6322	97.5391	114.298	114.754	102.959	108.348	107.234	105.46	91.9195	86.9506	104.091	86.244	102.476	99.8728	98.7561	91.1863	101.32	89.1482	108.678	104.615	87.0206	78.1308	104.573	89.3694	96.2716	102.635	103.087	96.4413	103.376	89.8026	94.3298	99.2888	93.4185	109.554	96.5408	119.271	104.71	118.889
	102.746	102.511	107.844	108.704	106.454	105.959	105.106	100.111	104.945	103.744	97.8216	94.9185	97.5391	114.298	116.575	101.733	108.348	106.44	106.762	92.7785	87.5544	103.144	85.364	102.476	99.8728	101.355	91.1863	101.32	89.1482	108.678	104.615	87.8573	78.1308	103.68	88.6184	95.1456	102.635	103.087	96.4413	101.785	89.8026	94.3298	99.2888	94.1905	108.814	95.4682	117.45	103.641	117.946
	101.99	103.152	106.235	108.704	107.119	105.959	105.106	100.111	106.665	103.744	99.4796	96.3459	97.5391	117.228	117.486	101.733	107.568	105.645	108.064	92.7785	88.762	104.091	87.1241	102.476	101.076	100.056	91.1863	101.32	90.5197	108.678	104.615	87.0206	79.1726	102.786	90.1204	94.5826	102.635	103.087	96.4413	101.785	89.0217	95.1796	99.2888	94.1905	108.074	94.3955	117.45	103.641	117.946
	102.746	103.793	107.844	108.704	107.119	105.083	106.088	100.9	107.525	104.662	99.4796	97.0596	97.5391	117.228	119.308	101.733	107.568	106.44	109.366	91.9195	89.3659	104.091	87.1241	103.383	101.076	100.056	91.1863	101.32	90.5197	109.365	104.615	87.8573	79.1726	101.892	90.8714	94.0196	103.324	103.087	96.4413	100.195	87.4599	95.1796	99.2888	94.9626	107.333	93.3228	118.36	103.641	117.946
	102.746	105.074	107.844	108.704	107.119	105.083	106.088	101.688	107.525	104.662	98.6506	97.0596	97.5391	117.228	120.218	101.733	107.568	108.028	110.668	91.9195	89.9697	104.091	86.244	104.29	102.279	100.056	91.1863	102.334	91.8912	109.365	103.689	87.8573	78.1308	101.892	90.8714	94.0196	102.635	102.447	96.4413	98.6047	88.2408	95.1796	100.282	94.9626	106.593	94.3955	119.271	103.641	117.946
	103.501	105.074	108.649	108.704	106.454	105.083	106.088	102.476	108.385	105.58	97.8216	97.7732	97.5391	117.228	119.308	101.733	107.568	109.617	111.97	91.9195	89.9697	102.198	86.244	105.197	103.483	100.056	91.1863	102.334	93.2627	107.302	103.689	87.0206	78.1308	100.998	90.8714	94.5826	102.635	101.807	96.4413	99.3999	87.4599	95.1796	100.282	94.9626	105.853	94.3955	119.271	102.573	117.946
	103.501	105.074	108.649	107.933	106.454	105.083	107.07	102.476	108.385	106.498	96.9926	99.2006	97.5391	115.275	120.218	100.507	108.348	111.206	111.97	91.0604	89.3659	101.252	86.244	104.29	104.686	97.4567	92.1668	102.334	94.6342	107.302	102.763	88.6941	78.1308	100.998	90.1204	95.1456	101.258	100.526	97.2799	98.6047	87.4599	95.1796	100.282	94.1905	105.853	94.3955	120.181	102.573	117.946
	104.257	105.074	109.454	106.391	105.788	105.083	107.07	102.476	109.246	106.498	96.9926	99.2006	97.5391	115.275	119.308	101.733	109.127	112.794	110.668	91.9195	88.1582	101.252	87.1241	103.383	104.686	98.7561	92.1668	101.32	94.6342	107.99	102.763	89.5308	78.1308	100.105	90.1204	95.7086	100.569	100.526	98.1185	99.3999	87.4599	95.1796	99.2888	92.6464	106.593	95.4682	120.181	101.505	117.946
	104.257	104.433	109.454	106.391	105.788	105.959	106.088	102.476	110.106	106.498	97.8216	99.9142	96.636	115.275	119.308	101.733	108.348	112.794	110.668	91.0604	88.1582	99.3594	86.244	103.383	104.686	97.4567	93.1473	101.32	97.3772	108.678	102.763	88.6941	78.1308	100.105	90.8714	96.8346	99.8801	99.8857	98.9571	100.195	88.2408	96.0294	99.2888	91.8744	106.593	96.5408	120.181	100.436	117.946
	103.501	103.793	109.454	107.162	106.454	105.959	105.106	101.688	110.106	105.58	97.8216	99.9142	96.636	114.298	119.308	101.733	107.568	112	110.668	91.9195	86.9506	98.4131	85.364	103.383	104.686	97.4567	93.1473	102.334	100.12	109.365	101.837	87.8573	79.1726	100.998	90.1204	96.8346	99.8801	99.8857	100.634	99.3999	89.0217	96.8793	98.2959	91.8744	106.593	97.6135	120.181	98.2992	118.889
	104.257	103.793	111.063	107.162	105.788	105.083	104.123	100.111	109.246	104.662	98.6506	100.628	96.636	113.321	119.308	101.733	107.568	109.617	110.668	91.9195	86.9506	97.4668	83.6039	103.383	105.889	97.4567	93.1473	102.334	102.863	108.678	100.912	87.0206	80.2143	101.892	90.8714	97.3975	99.8801	99.2454	102.312	100.195	89.0217	97.7291	97.303	92.6464	106.593	95.4682	119.271	97.2307	119.833
	103.501	103.793	111.063	107.162	105.788	105.083	104.123	100.111	108.385	104.662	99.4796	99.9142	97.5391	111.367	119.308	100.507	106.789	108.028	110.668	91.0604	86.9506	98.4131	84.484	103.383	105.889	97.4567	94.1278	103.347	105.606	108.678	100.912	87.0206	80.2143	102.786	91.6224	97.3975	100.569	99.8857	103.15	100.195	88.2408	97.7291	96.3101	93.4185	107.333	94.3955	119.271	96.1622	119.833
	104.257	102.511	112.673	106.391	105.788	105.959	105.106	98.5347	108.385	104.662	101.138	99.2006	98.4423	111.367	121.129	101.733	106.789	107.234	111.97	89.3423	86.9506	98.4131	84.484	103.383	107.093	96.1573	95.1083	103.347	109.721	108.678	100.912	87.8573	81.2561	102.786	91.6224	97.9605	101.258	99.2454	103.989	100.99	87.4599	98.5789	96.3101	94.1905	108.074	93.3228	119.271	96.1622	119.833
	105.012	101.871	111.063	106.391	105.123	105.083	105.106	97.7465	107.525	104.662	101.138	98.4869	98.4423	112.344	121.129	101.733	107.568	107.234	110.668	88.4832	87.5544	99.3594	85.364	103.383	107.093	94.8579	97.0693	102.334	112.464	107.99	101.837	87.8573	83.3396	103.68	91.6224	97.3975	101.947	99.8857	104.827	101.785	87.4599	99.4287	96.3101	93.4185	108.074	93.3228	118.36	95.0937	119.833
	104.257	101.871	111.868	105.62	105.123	106.834	105.106	96.9582	107.525	104.662	99.4796	98.4869	98.4423	113.321	122.951	102.959	106.789	108.028	110.668	88.4832	87.5544	98.4131	86.244	103.383	107.093	93.5585	100.011	100.307	113.835	107.302	99.9858	89.5308	85.423	102.786	92.3734	96.2716	102.635	100.526	104.827	100.99	88.2408	100.279	96.3101	91.8744	108.074	93.3228	118.36	95.0937	118.889
	103.501	101.23	111.868	106.391	105.123	106.834	104.123	96.9582	107.525	104.662	98.6506	97.7732	97.5391	114.298	125.683	102.959	106.789	107.234	109.366	86.7651	86.9506	97.4668	86.244	102.476	105.889	93.5585	103.933	100.307	112.464	107.99	99.0601	90.3675	85.423	100.998	92.3734	95.7086	103.324	100.526	105.666	100.99	89.8026	100.279	96.3101	90.3302	107.333	93.3228	118.36	94.0253	117.946
	102.746	101.23	111.868	105.62	105.123	105.959	104.123	96.1699	107.525	105.58	97.8216	97.0596	96.636	114.298	127.504	101.733	107.568	107.234	108.064	86.7651	86.3468	96.5205	87.1241	101.569	104.686	93.5585	106.874	99.294	112.464	107.99	97.2085	88.6941	86.4648	100.105	92.3734	95.1456	103.324	100.526	106.505	100.195	92.1453	100.279	96.3101	88.7861	107.333	93.3228	118.36	92.9568	117.946
	101.99	101.23	113.478	104.849	105.788	105.083	104.123	95.3816	105.805	105.58	97.8216	96.3459	95.7328	113.321	128.415	102.959	108.348	107.234	108.064	85.9061	86.3468	95.5742	86.244	100.662	104.686	94.8579	109.816	99.294	111.092	107.99	96.2827	87.8573	87.5065	99.2107	93.1244	95.1456	102.635	100.526	106.505	100.195	94.488	100.279	96.3101	87.242	107.333	93.3228	118.36	92.9568	117.002
	103.501	101.871	114.283	105.62	106.454	105.959	105.106	95.3816	104.945	105.58	98.6506	96.3459	94.8297	112.344	128.415	102.959	108.348	108.028	108.064	85.9061	85.7429	94.628	88.0041	100.662	104.686	94.8579	111.777	100.307	109.721	107.99	96.2827	85.3471	86.4648	99.2107	94.6264	95.1456	102.635	99.2454	104.827	100.99	95.2688	101.128	96.3101	87.242	107.333	93.3228	119.271	92.9568	117.002
	104.257	101.23	113.478	106.391	107.119	106.834	105.106	96.1699	105.805	104.662	97.8216	97.7732	93.9266	112.344	127.504	102.959	109.127	109.617	106.762	85.9061	86.3468	93.6817	88.8842	101.569	104.686	94.8579	111.777	101.32	108.349	107.99	97.2085	84.5104	85.423	98.3169	94.6264	94.5826	102.635	99.2454	103.989	100.195	95.2688	101.128	97.303	87.242	108.074	91.1775	118.36	92.9568	117.002
	105.012	101.871	112.673	107.162	108.45	106.834	105.106	97.7465	104.945	104.662	97.8216	99.9142	93.9266	112.344	126.594	102.959	108.348	112.794	106.762	86.7651	86.3468	94.628	89.7642	101.569	104.686	96.1573	109.816	101.32	106.978	107.302	96.2827	84.5104	84.3813	98.3169	95.3775	94.5826	101.947	97.9648	103.15	100.195	95.2688	101.128	98.2959	88.0141	108.814	90.1048	118.36	90.8199	116.059
	104.257	101.871	112.673	107.933	109.115	107.71	104.123	99.323	104.945	105.58	97.8216	100.628	93.9266	111.367	126.594	101.733	108.348	115.177	106.762	88.4832	86.9506	94.628	91.5243	102.476	103.483	93.5585	107.855	102.334	105.606	106.614	97.2085	84.5104	83.3396	99.2107	96.1285	94.5826	101.947	97.9648	103.15	100.195	96.0497	100.279	98.2959	88.0141	108.814	91.1775	117.45	89.7514	116.059
	105.012	103.152	112.673	107.933	109.78	106.834	105.106	99.323	104.084	105.58	97.8216	100.628	93.9266	109.413	124.772	100.507	107.568	116.766	106.762	90.2014	87.5544	94.628	90.6443	102.476	103.483	93.5585	104.913	102.334	104.235	108.678	96.2827	84.5104	82.2978	98.3169	95.3775	95.1456	102.635	97.9648	103.15	100.195	95.2688	99.4287	98.2959	88.7861	109.554	92.2501	115.629	86.546	117.002
	106.523	103.793	111.868	107.933	109.115	107.71	104.123	100.111	105.805	105.58	97.8216	101.342	93.9266	108.436	124.772	100.507	106.789	117.56	105.46	91.9195	87.5544	94.628	89.7642	102.476	102.279	96.1573	103.933	102.334	102.863	107.302	98.1343	85.3471	82.2978	98.3169	96.1285	95.1456	102.635	97.9648	104.827	99.3999	94.488	98.5789	97.303	91.1023	110.294	93.3228	112.897	84.4091	117.002
	106.523	103.793	111.063	108.704	109.115	109.461	103.141	100.9	105.805	104.662	96.9926	101.342	93.9266	107.459	125.683	100.507	106.789	116.766	105.46	91.0604	87.5544	94.628	88.8842	102.476	101.076	97.4567	102.952	101.32	101.492	105.926	98.1343	84.5104	82.2978	97.4231	96.1285	95.1456	101.258	98.6051	104.827	99.3999	93.7071	97.7291	97.303	92.6464	111.775	96.5408	112.897	83.3406	117.946
	106.523	103.793	110.259	109.475	109.115	108.586	102.159	100.111	106.665	102.826	96.9926	100.628	93.9266	108.436	126.594	98.0559	106.789	115.972	105.46	89.3423	87.5544	94.628	88.8842	102.476	101.076	97.4567	100.991	100.307	101.492	105.926	97.2085	84.5104	81.2561	97.4231	96.1285	95.1456	101.258	98.6051	105.666	99.3999	92.9262	96.0294	97.303	91.8744	113.255	97.6135	112.897	83.3406	118.889
	108.034	103.152	109.454	109.475	109.78	107.71	102.159	99.323	107.525	101.908	96.9926	99.9142	93.9266	108.436	127.504	96.8302	106.789	113.589	104.158	88.4832	87.5544	95.5742	87.1241	101.569	101.076	97.4567	100.991	99.294	98.7487	105.238	97.2085	83.6736	80.2143	95.6356	94.6264	94.5826	100.569	98.6051	103.989	99.3999	93.7071	96.0294	97.303	89.5582	113.996	99.7589	111.077	83.3406	119.833
	107.279	103.152	107.844	110.246	110.446	105.959	102.159	99.323	109.246	100.99	96.9926	99.9142	94.8297	107.459	128.415	96.8302	107.568	112	104.158	87.6242	88.1582	95.5742	87.1241	100.662	101.076	98.7561	100.011	98.2807	98.7487	105.238	98.1343	82.8369	80.2143	94.7418	93.8754	94.0196	100.569	98.6051	103.15	100.195	94.488	95.1796	97.303	88.0141	114.736	100.832	110.166	83.3406	119.833
	107.279	103.152	106.235	110.246	109.78	106.834	103.141	100.111	108.385	100.99	96.9926	99.9142	94.8297	107.459	129.326	95.6045	107.568	112	104.158	89.3423	88.762	95.5742	87.1241	99.7555	101.076	100.056	100.011	98.2807	98.7487	104.551	97.2085	82.8369	80.2143	92.9542	93.8754	94.5826	100.569	97.9648	102.312	99.3999	94.488	96.0294	98.2959	87.242	115.476	102.977	110.166	83.3406	118.889
	106.523	102.511	105.43	110.246	109.78	106.834	104.123	100.111	110.106	101.908	96.1636	100.628	95.7328	108.436	129.326	95.6045	107.568	111.206	104.158	90.2014	88.762	95.5742	87.1241	98.8486	102.279	97.4567	100.011	100.307	98.7487	104.551	97.2085	82.8369	80.2143	92.9542	94.6264	95.1456	99.1913	97.9648	102.312	98.6047	94.488	96.0294	99.2888	88.0141	115.476	105.122	110.166	84.4091	118.889
	105.012	102.511	105.43	108.704	109.115	106.834	104.123	100.9	109.246	103.744	96.9926	100.628	95.7328	108.436	128.415	95.6045	108.348	111.206	104.158	91.0604	87.5544	95.5742	87.1241	99.7555	102.279	97.4567	101.972	101.32	97.3772	103.863	98.1343	81.1634	80.2143	92.9542	95.3775	95.7086	98.5025	97.9648	102.312	97.8095	94.488	96.0294	100.282	88.0141	114.736	104.05	111.987	85.4775	119.833
	103.501	102.511	105.43	107.933	108.45	105.959	105.106	101.688	108.385	104.662	96.9926	102.055	95.7328	108.436	126.594	96.8302	108.348	112	104.158	90.2014	86.3468	95.5742	87.1241	100.662	102.279	96.1573	104.913	101.32	97.3772	104.551	98.1343	81.1634	81.2561	93.848	94.6264	95.7086	98.5025	97.9648	102.312	97.8095	94.488	96.0294	100.282	88.7861	114.736	102.977	113.808	86.546	120.776
	103.501	102.511	106.235	106.391	107.784	105.083	106.088	101.688	108.385	105.58	97.8216	102.769	94.8297	108.436	125.683	99.2816	108.348	112.794	104.158	88.4832	85.1391	95.5742	87.1241	101.569	102.279	96.1573	107.855	101.32	96.0057	105.926	98.1343	81.1634	80.2143	94.7418	94.6264	95.1456	98.5025	97.9648	102.312	99.3999	93.7071	95.1796	99.2888	89.5582	113.996	102.977	113.808	86.546	122.664
	102.746	103.152	107.844	105.62	107.119	105.959	106.088	102.476	109.246	106.498	97.8216	102.055	94.8297	108.436	125.683	101.733	108.348	113.589	105.46	87.6242	83.9315	94.628	87.1241	101.569	102.279	96.1573	108.835	100.307	94.6342	105.926	99.0601	81.1634	79.1726	95.6356	93.8754	94.5826	98.5025	97.9648	102.312	98.6047	93.7071	95.1796	98.2959	91.1023	113.996	102.977	113.808	87.6145	124.551
	103.501	101.871	108.649	106.391	106.454	105.083	107.07	103.264	110.106	106.498	97.8216	102.769	94.8297	109.413	126.594	102.959	108.348	114.383	104.158	87.6242	83.9315	93.6817	87.1241	102.476	102.279	96.1573	108.835	99.294	94.6342	105.926	99.0601	81.1634	79.1726	96.5294	93.1244	93.4566	98.5025	97.3245	102.312	99.3999	93.7071	95.1796	97.303	92.6464	113.996	101.904	113.808	87.6145	125.494
	104.257	101.871	109.454	107.162	107.119	106.834	108.053	103.264	110.106	107.417	97.8216	103.483	93.9266	110.39	126.594	104.184	109.127	114.383	105.46	87.6242	84.5353	91.7891	88.0041	102.476	102.279	97.4567	107.855	99.294	96.0057	104.551	97.2085	82.0002	80.2143	97.4231	93.1244	92.8936	98.5025	97.3245	102.312	100.99	92.9262	95.1796	96.3101	94.1905	113.255	100.832	112.897	87.6145	125.494
	104.257	101.871	110.259	107.933	107.784	108.586	109.035	103.264	111.826	107.417	98.6506	104.196	94.8297	110.39	126.594	105.41	109.907	113.589	104.158	88.4832	84.5353	90.8428	88.0041	102.476	103.483	96.1573	105.894	99.294	96.0057	105.238	99.0601	83.6736	81.2561	97.4231	94.6264	92.3306	99.1913	97.9648	102.312	100.99	92.1453	95.1796	96.3101	95.7346	112.515	97.6135	111.987	87.6145	125.494
	104.257	102.511	109.454	109.475	109.115	109.461	109.035	103.264	109.246	107.417	99.4796	103.483	94.8297	110.39	127.504	106.636	109.907	112.794	104.158	88.4832	85.7429	89.8966	88.8842	101.569	103.483	96.1573	102.952	98.2807	97.3772	105.238	98.1343	83.6736	83.3396	96.5294	94.6264	92.3306	98.5025	97.9648	103.15	100.99	92.9262	95.1796	96.3101	94.1905	111.775	96.5408	111.077	88.6829	126.438
	105.012	101.871	109.454	109.475	110.446	109.461	110.017	102.476	108.385	106.498	99.4796	102.769	95.7328	111.367	127.504	106.636	110.686	112	104.158	87.6242	86.9506	89.8966	89.7642	101.569	104.686	97.4567	102.952	98.2807	98.7487	105.238	97.2085	85.3471	83.3396	95.6356	94.6264	92.3306	98.5025	97.9648	102.312	100.195	94.488	93.48	96.3101	93.4185	111.035	95.4682	110.166	87.6145	127.381
	105.012	102.511	109.454	109.475	111.777	108.586	109.035	103.264	105.805	107.417	99.4796	100.628	96.636	111.367	126.594	106.636	111.466	112	104.158	87.6242	88.1582	90.8428	90.6443	100.662	104.686	98.7561	103.933	98.2807	100.12	105.238	96.2827	85.3471	84.3813	94.7418	94.6264	92.8936	98.5025	97.9648	101.473	100.99	96.8306	90.9305	96.3101	91.8744	111.035	95.4682	107.435	87.6145	128.325
	103.501	101.871	110.259	109.475	113.107	108.586	107.07	102.476	104.084	108.335	98.6506	97.7732	96.636	111.367	126.594	106.636	111.466	111.206	105.46	87.6242	88.762	90.8428	91.5243	99.7555	104.686	100.056	104.913	98.2807	101.492	105.238	95.3569	86.1839	85.423	94.7418	92.3734	93.4566	98.5025	97.3245	101.473	100.99	99.9542	90.0807	95.3172	92.6464	110.294	95.4682	103.793	87.6145	129.269
	101.235	102.511	108.649	110.246	114.438	106.834	107.07	102.476	103.224	109.253	99.4796	97.7732	96.636	112.344	124.772	105.41	111.466	111.206	106.762	87.6242	89.3659	90.8428	91.5243	99.7555	105.889	100.056	106.874	98.2807	104.235	104.551	95.3569	87.8573	85.423	94.7418	92.3734	92.8936	98.5025	97.9648	101.473	100.99	102.297	89.2309	95.3172	94.9626	110.294	96.5408	101.061	87.6145	130.212
	98.2127	102.511	107.844	109.475	114.438	108.586	106.088	102.476	102.364	110.171	98.6506	97.7732	97.5391	111.367	123.861	102.959	110.686	109.617	105.46	87.6242	89.9697	91.7891	92.4043	98.8486	107.093	100.056	106.874	99.294	104.235	105.238	95.3569	89.5308	86.4648	93.848	90.8714	93.4566	98.5025	97.9648	101.473	100.99	103.859	89.2309	94.3243	97.2787	110.294	96.5408	99.2405	87.6145	130.212
	98.2127	102.511	107.844	108.704	113.773	108.586	107.07	102.476	102.364	111.089	98.6506	97.0596	97.5391	111.367	122.951	101.733	109.127	107.234	105.46	87.6242	88.762	92.7354	91.5243	98.8486	107.093	101.355	105.894	99.294	104.235	104.551	96.2827	91.2043	86.4648	92.9542	90.1204	93.4566	98.5025	98.6051	102.312	100.99	105.42	90.0807	94.3243	99.5949	111.035	94.3955	97.4196	87.6145	131.156
	98.9682	102.511	107.844	107.933	112.442	110.337	108.053	102.476	103.224	111.089	98.6506	97.0596	98.4423	113.321	121.129	99.2816	108.348	106.44	105.46	87.6242	88.1582	93.6817	89.7642	98.8486	104.686	100.056	104.913	99.294	102.863	104.551	95.3569	93.7145	87.5065	93.848	90.1204	93.4566	99.1913	98.6051	103.989	100.99	105.42	90.9305	93.3315	100.367	111.775	93.3228	96.5091	88.6829	132.099
	100.479	103.152	109.454	107.162	110.446	109.461	109.035	102.476	104.945	110.171	97.8216	96.3459	97.5391	114.298	121.129	98.0559	108.348	107.234	106.762	87.6242	87.5544	93.6817	88.8842	99.7555	103.483	101.355	103.933	100.307	104.235	103.863	94.4311	95.388	88.5483	94.7418	89.3694	93.4566	99.1913	98.6051	104.827	99.3999	105.42	90.9305	93.3315	100.367	113.255	94.3955	96.5091	88.6829	132.099
	101.99	103.152	108.649	106.391	109.78	108.586	108.053	103.264	105.805	110.171	96.9926	95.6322	97.5391	115.275	121.129	98.0559	108.348	108.028	108.064	87.6242	88.1582	93.6817	88.8842	100.662	102.279	101.355	102.952	101.32	102.863	104.551	92.5795	96.2247	88.5483	95.6356	90.1204	92.3306	99.1913	98.6051	105.666	98.6047	105.42	90.9305	92.3386	101.139	113.996	95.4682	93.7777	89.7514	132.099
	101.99	103.793	109.454	106.391	109.115	108.586	108.053	102.476	104.945	111.089	97.8216	94.9185	97.5391	114.298	122.04	98.0559	109.127	108.028	109.366	88.4832	88.762	92.7354	88.8842	101.569	101.076	101.355	101.972	102.334	102.863	105.238	92.5795	97.8982	89.59	95.6356	90.8714	92.8936	99.1913	98.6051	106.505	98.6047	104.64	90.9305	92.3386	101.911	113.996	96.5408	93.7777	90.8199	131.156
	102.746	103.152	108.649	105.62	109.78	109.461	108.053	102.476	104.084	112.007	97.8216	93.4912	97.5391	113.321	121.129	99.2816	110.686	108.823	108.064	90.2014	89.3659	92.7354	88.8842	101.569	101.076	102.654	102.952	103.347	102.863	105.926	91.6537	98.7349	89.59	95.6356	90.1204	92.3306	99.8801	98.6051	106.505	97.8095	103.859	91.7804	92.3386	101.911	113.996	96.5408	95.5986	91.8883	130.212
	102.746	102.511	107.844	105.62	109.78	110.337	108.053	102.476	103.224	112.925	97.8216	92.7775	96.636	113.321	121.129	101.733	111.466	110.411	106.762	91.0604	89.3659	93.6817	88.8842	102.476	99.8728	102.654	102.952	104.36	104.235	105.926	90.7279	99.5716	89.59	96.5294	90.8714	91.7676	100.569	99.8857	107.343	97.0143	103.078	91.7804	92.3386	102.683	113.996	95.4682	98.33	91.8883	129.269
	103.501	103.152	108.649	104.849	109.78	111.213	109.035	102.476	104.084	113.843	97.8216	92.7775	95.7328	113.321	118.397	101.733	112.245	110.411	105.46	91.0604	88.762	93.6817	88.8842	101.569	99.8728	100.056	102.952	104.36	104.235	105.926	89.8021	100.408	90.6318	96.5294	90.8714	92.3306	101.258	99.8857	105.666	97.8095	101.516	91.7804	93.3315	101.911	113.255	95.4682	101.061	92.9568	128.325
	103.501	103.793	107.844	105.62	111.111	110.337	109.035	102.476	104.084	112.925	98.6506	92.7775	94.8297	113.321	118.397	101.733	113.025	111.206	105.46	90.2014	88.1582	94.628	88.8842	100.662	101.076	101.355	104.913	103.347	105.606	105.926	90.7279	100.408	90.6318	96.5294	91.6224	91.7676	101.947	101.166	103.989	98.6047	99.9542	90.9305	93.3315	101.139	113.255	95.4682	103.793	94.0253	129.269
	105.012	103.793	108.649	105.62	111.777	111.213	109.035	102.476	104.084	111.089	99.4796	92.7775	93.9266	114.298	118.397	100.507	113.025	111.206	106.762	89.3423	88.1582	96.5205	88.0041	101.569	103.483	100.056	104.913	103.347	105.606	105.926	91.6537	99.5716	90.6318	95.6356	91.6224	91.7676	102.635	101.166	103.15	98.6047	99.1733	90.9305	95.3172	101.911	113.255	95.4682	108.345	95.0937	128.325
	105.012	104.433	107.844	105.62	111.777	109.461	109.035	102.476	104.084	110.171	100.309	93.4912	93.0234	114.298	120.218	99.2816	113.804	111.206	108.064	88.4832	86.9506	96.5205	88.0041	101.569	105.889	100.056	105.894	104.36	106.978	105.238	92.5795	98.7349	90.6318	96.5294	91.6224	90.6416	102.635	100.526	101.473	98.6047	96.8306	90.9305	96.3101	101.911	113.255	96.5408	111.077	96.1622	127.381
	105.768	105.074	108.649	106.391	112.442	108.586	109.035	102.476	104.084	109.253	101.138	94.2049	92.1203	115.275	120.218	99.2816	113.025	111.206	109.366	88.4832	86.3468	96.5205	88.0041	102.476	107.093	98.7561	106.874	103.347	105.606	106.614	92.5795	97.0614	91.6735	96.5294	90.8714	90.6416	101.947	101.166	100.634	97.0143	95.2688	90.9305	97.303	101.139	113.996	97.6135	111.987	97.2307	127.381
	105.012	105.074	109.454	107.162	113.107	109.461	109.035	103.264	104.084	109.253	101.138	94.2049	92.1203	115.275	122.04	102.959	113.804	110.411	110.668	88.4832	86.3468	96.5205	88.8842	102.476	108.296	100.056	106.874	104.36	105.606	105.926	92.5795	94.5512	92.7153	97.4231	91.6224	90.6416	101.258	99.8857	99.7958	97.8095	94.488	90.9305	97.303	100.367	114.736	95.4682	111.987	97.2307	128.325
	105.012	104.433	109.454	106.391	114.438	107.71	108.053	103.264	104.945	109.253	101.138	94.2049	92.1203	114.298	120.218	104.184	113.804	109.617	110.668	87.6242	85.7429	96.5205	89.7642	102.476	108.296	101.355	106.874	105.373	104.235	106.614	93.5053	93.7145	93.757	98.3169	92.3734	90.0787	101.258	99.8857	99.7958	97.8095	94.488	90.9305	96.3101	99.5949	115.476	92.2501	111.077	97.2307	129.269
	104.257	103.152	108.649	105.62	115.769	107.71	108.053	104.053	105.805	109.253	100.309	94.9185	92.1203	113.321	120.218	107.861	113.025	108.028	110.668	85.9061	85.7429	95.5742	88.8842	102.476	108.296	102.654	106.874	105.373	102.863	105.926	94.4311	95.388	94.7987	100.105	93.1244	90.0787	100.569	99.8857	100.634	97.8095	94.488	91.7804	96.3101	99.5949	115.476	91.1775	112.897	96.1622	129.269
	104.257	103.152	109.454	104.849	116.434	106.834	107.07	104.841	106.665	109.253	99.4796	95.6322	93.0234	113.321	118.397	107.861	112.245	107.234	110.668	85.047	85.7429	94.628	88.8842	102.476	108.296	102.654	107.855	105.373	101.492	106.614	95.3569	95.388	95.8405	100.998	93.8754	88.9527	99.8801	99.2454	101.473	96.2191	94.488	92.6302	95.3172	99.5949	116.216	91.1775	113.808	95.0937	129.269
	103.501	102.511	109.454	104.078	117.099	107.71	104.123	104.841	105.805	108.335	100.309	96.3459	93.0234	111.367	119.308	109.087	112.245	105.645	111.97	84.1879	86.3468	94.628	88.0041	102.476	107.093	103.954	106.874	105.373	100.12	106.614	97.2085	96.2247	94.7987	100.998	95.3775	89.5157	99.1913	99.8857	101.473	94.6287	95.2688	93.48	95.3172	99.5949	114.736	92.2501	113.808	94.0253	128.325
	105.012	102.511	109.454	104.078	117.099	106.834	103.141	105.629	106.665	108.335	100.309	97.0596	93.0234	110.39	118.397	109.087	111.466	104.851	113.272	84.1879	86.9506	94.628	88.0041	101.569	105.889	103.954	106.874	104.36	98.7487	107.302	99.9858	93.7145	91.6735	100.998	96.1285	90.0787	98.5025	99.2454	103.15	94.6287	95.2688	95.1796	95.3172	99.5949	113.996	93.3228	111.987	92.9568	129.269
	105.012	103.793	109.454	104.078	117.099	107.71	102.159	105.629	104.945	107.417	101.138	97.7732	91.2171	109.413	118.397	109.087	111.466	105.645	117.178	85.047	87.5544	95.5742	88.0041	100.662	104.686	106.553	107.855	104.36	97.3772	107.302	99.9858	92.8777	89.59	100.998	96.1285	89.5157	98.5025	98.6051	102.312	95.4239	96.0497	96.0294	96.3101	99.5949	113.255	91.1775	111.077	92.9568	129.269
	104.257	104.433	109.454	104.078	116.434	108.586	101.176	105.629	104.945	107.417	101.138	97.7732	90.314	110.39	118.397	107.861	111.466	105.645	118.48	85.9061	88.1582	96.5205	89.7642	100.662	104.686	107.852	109.816	104.36	97.3772	107.302	99.9858	91.2043	87.5065	100.998	96.1285	90.6416	98.5025	98.6051	102.312	95.4239	96.0497	96.0294	97.303	100.367	113.255	91.1775	110.166	92.9568	129.269
	101.235	104.433	107.844	104.849	116.434	108.586	101.176	104.841	104.945	108.335	101.967	97.7732	89.4109	111.367	118.397	106.636	111.466	106.44	121.084	86.7651	88.1582	96.5205	90.6443	101.569	103.483	109.152	108.835	104.36	96.0057	107.302	98.1343	91.2043	85.423	100.998	95.3775	91.7676	97.8136	97.3245	102.312	96.2191	96.8306	96.8793	99.2888	100.367	113.996	92.2501	111.987	92.9568	129.269
	100.479	104.433	107.844	106.391	116.434	109.461	101.176	104.053	104.945	107.417	101.138	97.7732	89.4109	112.344	118.397	102.959	110.686	107.234	123.688	88.4832	88.1582	96.5205	93.2844	101.569	102.279	109.152	109.816	104.36	94.6342	107.99	96.2827	92.041	85.423	101.892	94.6264	92.3306	97.8136	97.3245	101.473	95.4239	96.8306	96.8793	100.282	98.0508	113.996	91.1775	113.808	92.9568	130.212
	98.2127	103.793	106.235	107.162	116.434	107.71	101.176	104.053	105.805	106.498	101.138	98.4869	89.4109	113.321	117.486	100.507	110.686	107.234	126.292	87.6242	86.9506	96.5205	94.1644	100.662	102.279	109.152	109.816	104.36	94.6342	108.678	95.3569	92.041	84.3813	101.892	93.8754	93.4566	97.8136	96.6842	100.634	95.4239	96.8306	96.8793	101.275	96.5067	114.736	92.2501	115.629	92.9568	130.212
	97.4572	102.511	106.235	107.162	116.434	106.834	102.159	104.053	104.945	105.58	101.138	98.4869	90.314	113.321	117.486	99.2816	110.686	107.234	128.896	87.6242	86.3468	95.5742	95.0445	100.662	102.279	109.152	109.816	104.36	93.2627	108.678	95.3569	92.041	84.3813	102.786	94.6264	93.4566	99.1913	95.4036	99.7958	96.2191	97.6115	96.8793	101.275	95.7346	115.476	93.3228	114.718	94.0253	130.212
	96.7018	101.871	104.625	106.391	116.434	105.959	103.141	104.841	105.805	104.662	101.967	98.4869	91.2171	113.321	118.397	99.2816	111.466	107.234	131.5	87.6242	85.7429	95.5742	95.9245	101.569	102.279	107.852	109.816	104.36	90.5197	107.99	95.3569	91.2043	84.3813	103.68	93.1244	92.3306	100.569	95.4036	99.7958	96.2191	97.6115	97.7291	102.267	94.9626	114.736	93.3228	114.718	94.0253	130.212
	98.2127	101.871	105.43	106.391	115.769	105.959	102.159	104.841	104.945	104.662	101.967	97.7732	91.2171	114.298	118.397	99.2816	111.466	107.234	134.104	88.4832	85.7429	95.5742	96.8045	101.569	102.279	105.253	110.796	104.36	90.5197	107.99	96.2827	90.3675	85.423	102.786	92.3734	91.7676	101.258	94.7633	98.1185	95.4239	97.6115	96.8793	101.275	94.9626	113.996	95.4682	113.808	94.0253	131.156
	98.2127	101.871	104.625	106.391	115.103	104.207	103.141	105.629	104.945	106.498	101.967	97.7732	92.1203	115.275	118.397	100.507	111.466	105.645	135.406	88.4832	86.3468	94.628	97.6846	101.569	102.279	102.654	108.835	104.36	91.8912	107.99	97.2085	89.5308	86.4648	102.786	91.6224	91.2046	100.569	95.4036	98.1185	95.4239	97.6115	96.0294	102.267	94.9626	113.996	96.5408	111.987	94.0253	131.156
	99.7237	101.871	103.82	105.62	115.103	103.332	103.141	106.418	104.945	107.417	101.967	97.7732	93.0234	116.251	116.575	101.733	111.466	105.645	136.708	88.4832	86.3468	94.628	98.5646	101.569	101.076	101.355	107.855	104.36	91.8912	107.99	99.0601	89.5308	86.4648	102.786	92.3734	91.2046	99.8801	95.4036	98.9571	95.4239	97.6115	95.1796	103.26	95.7346	113.255	97.6135	112.897	95.0937	132.099
	99.7237	101.23	104.625	105.62	114.438	102.456	103.141	106.418	104.084	108.335	101.138	97.7732	93.9266	116.251	117.486	100.507	112.245	104.851	136.708	90.2014	86.3468	94.628	99.4447	102.476	102.279	100.056	105.894	104.36	90.5197	107.99	99.0601	89.5308	85.423	103.68	91.6224	91.7676	99.8801	95.4036	98.9571	96.2191	97.6115	95.1796	104.253	95.7346	113.255	98.6862	112.897	97.2307	132.099
	100.479	101.23	103.82	105.62	114.438	102.456	103.141	106.418	104.084	108.335	99.4796	97.7732	94.8297	117.228	116.575	100.507	112.245	105.645	138.01	90.2014	86.3468	94.628	101.205	103.383	101.076	101.355	105.894	104.36	89.1482	107.99	97.2085	89.5308	85.423	104.573	90.8714	91.7676	100.569	96.0439	98.9571	95.4239	98.3924	94.3298	105.246	97.2787	112.515	98.6862	112.897	98.2992	133.043
	100.479	101.23	103.015	105.62	114.438	102.456	103.141	106.418	104.084	108.335	98.6506	97.7732	94.8297	117.228	116.575	100.507	111.466	107.234	138.01	91.0604	85.7429	94.628	101.205	104.29	101.076	103.954	104.913	104.36	87.7767	107.99	95.3569	89.5308	84.3813	104.573	90.1204	92.8936	100.569	96.0439	99.7958	96.2191	99.1733	94.3298	108.225	98.8228	112.515	96.5408	112.897	100.436	132.099
	100.479	101.23	104.625	105.62	114.438	101.58	103.141	106.418	105.805	109.253	98.6506	97.7732	93.9266	118.205	115.665	100.507	112.245	108.028	136.708	91.0604	85.7429	94.628	101.205	105.197	99.8728	103.954	104.913	104.36	89.1482	107.302	94.4311	88.6941	84.3813	104.573	89.3694	94.0196	101.258	95.4036	101.473	96.2191	99.1733	95.1796	110.211	98.8228	112.515	96.5408	112.897	103.641	132.099
	100.479	101.23	105.43	105.62	113.773	101.58	104.123	105.629	106.665	110.171	97.8216	98.4869	93.0234	121.136	115.665	100.507	113.804	109.617	136.708	91.9195	86.3468	94.628	100.325	105.197	98.6695	106.553	106.874	104.36	89.1482	107.302	92.5795	87.8573	83.3396	103.68	88.6184	94.5826	101.258	95.4036	101.473	95.4239	99.9542	95.1796	111.203	99.5949	112.515	97.6135	111.077	106.847	132.099
	100.479	101.871	106.235	105.62	113.107	102.456	102.159	105.629	107.525	110.171	98.6506	98.4869	93.0234	122.113	115.665	101.733	114.583	110.411	134.104	90.2014	86.9506	93.6817	100.325	104.29	98.6695	107.852	107.855	104.36	87.7767	107.302	91.6537	87.8573	83.3396	103.68	89.3694	95.1456	101.947	96.0439	102.312	97.0143	100.735	96.0294	112.196	100.367	112.515	97.6135	110.166	110.052	131.156
	100.479	101.871	105.43	105.62	112.442	102.456	100.194	105.629	108.385	108.335	99.4796	98.4869	93.0234	125.044	114.754	102.959	116.142	110.411	130.198	87.6242	87.5544	93.6817	100.325	103.383	98.6695	106.553	109.816	104.36	89.1482	107.99	90.7279	87.0206	83.3396	102.786	89.3694	94.5826	101.947	96.0439	103.15	97.8095	100.735	96.0294	113.189	101.139	112.515	98.6862	106.524	112.189	131.156
	102.746	101.871	104.625	106.391	111.777	103.332	99.2119	105.629	108.385	107.417	101.138	98.4869	93.9266	125.044	114.754	101.733	116.142	110.411	127.594	85.9061	88.1582	92.7354	101.205	102.476	99.8728	103.954	110.796	104.36	89.1482	107.99	90.7279	87.0206	84.3813	101.892	89.3694	94.5826	101.947	96.6842	103.989	97.0143	99.9542	96.8793	113.189	103.455	112.515	97.6135	105.614	112.189	130.212
	104.257	103.152	104.625	107.162	110.446	104.207	99.2119	105.629	108.385	107.417	101.967	99.9142	95.7328	125.044	112.932	100.507	116.142	111.206	124.99	83.3289	88.1582	92.7354	101.205	101.569	101.076	102.654	112.757	104.36	89.1482	106.614	90.7279	87.8573	86.4648	101.892	89.3694	94.5826	102.635	96.0439	103.989	96.2191	97.6115	97.7291	113.189	104.999	111.775	93.3228	104.703	113.258	130.212
	105.012	103.793	106.235	106.391	109.115	104.207	99.2119	104.841	109.246	107.417	101.967	101.342	97.5391	125.044	113.843	99.2816	116.142	110.411	123.688	82.4698	87.5544	92.7354	101.205	101.569	101.076	101.355	113.738	102.334	90.5197	107.302	92.5795	88.6941	87.5065	101.892	88.6184	94.5826	102.635	96.6842	103.989	96.2191	94.488	99.4287	112.196	105.771	111.035	91.1775	102.882	115.395	130.212
	105.768	103.793	107.039	106.391	108.45	104.207	100.194	104.053	108.385	107.417	101.138	100.628	96.636	122.113	112.932	98.0559	117.701	108.823	122.386	82.4698	87.5544	92.7354	101.205	101.569	101.076	103.954	113.738	101.32	91.8912	107.99	93.5053	88.6941	89.59	101.892	88.6184	94.5826	102.635	96.6842	104.827	97.0143	92.9262	99.4287	112.196	107.315	110.294	89.0321	101.972	118.6	131.156
	105.012	103.793	109.454	104.849	107.784	104.207	99.2119	103.264	109.246	106.498	101.138	99.9142	96.636	118.205	112.022	98.0559	120.04	106.44	121.084	83.3289	87.5544	91.7891	99.4447	102.476	101.076	106.553	113.738	100.307	91.8912	107.99	95.3569	88.6941	88.5483	100.998	89.3694	94.5826	101.947	97.3245	103.989	96.2191	91.3644	98.5789	112.196	107.315	109.554	86.8868	101.061	120.737	132.099
	105.012	103.793	111.063	104.078	106.454	104.207	99.2119	103.264	107.525	105.58	101.967	98.4869	96.636	115.275	110.2	99.2816	122.378	105.645	122.386	85.047	86.9506	90.8428	98.5646	103.383	101.076	107.852	112.757	99.294	91.8912	107.99	95.3569	88.6941	87.5065	99.2107	90.1204	94.0196	101.258	97.3245	103.989	96.2191	90.5835	98.5789	111.203	106.543	109.554	85.8141	101.972	120.737	132.099
	103.501	103.152	110.259	104.078	105.788	104.207	99.2119	104.053	106.665	105.58	100.309	97.7732	95.7328	112.344	109.289	99.2816	124.717	104.057	123.688	86.7651	86.9506	89.8966	97.6846	103.383	101.076	111.75	112.757	99.294	91.8912	107.99	96.2827	89.5308	86.4648	99.2107	91.6224	93.4566	100.569	97.3245	103.15	95.4239	89.0217	98.5789	110.211	104.227	110.294	84.7414	102.882	117.532	132.099
	103.501	102.511	108.649	103.307	105.123	103.332	99.2119	104.841	105.805	105.58	98.6506	96.3459	94.8297	111.367	108.379	100.507	126.276	104.057	126.292	87.6242	86.9506	88.9503	96.8045	103.383	102.279	115.649	109.816	100.307	90.5197	108.678	95.3569	90.3675	84.3813	99.2107	91.6224	93.4566	99.8801	97.3245	103.989	96.2191	88.2408	98.5789	110.211	102.683	111.035	84.7414	104.703	114.326	132.099
	103.501	101.871	107.844	103.307	105.123	105.083	100.194	104.841	106.665	107.417	97.8216	94.9185	94.8297	112.344	107.468	100.507	127.835	103.262	126.292	87.6242	87.5544	88.9503	95.0445	102.476	102.279	118.247	108.835	100.307	90.5197	107.99	94.4311	90.3675	84.3813	98.3169	92.3734	93.4566	99.8801	97.9648	103.15	97.0143	88.2408	98.5789	111.203	101.139	111.775	85.8141	104.703	111.121	131.156
	105.012	101.23	108.649	104.078	105.123	105.083	101.176	104.841	104.945	109.253	97.8216	94.9185	95.7328	112.344	107.468	100.507	130.173	102.468	123.688	87.6242	88.1582	88.9503	94.1644	101.569	101.076	120.846	107.855	100.307	90.5197	107.302	92.5795	89.5308	84.3813	98.3169	92.3734	92.8936	99.1913	97.9648	103.15	97.0143	88.2408	98.5789	111.203	102.683	111.775	87.9594	104.703	110.052	130.212
	105.012	100.589	110.259	104.849	105.123	105.959	102.159	104.841	104.084	109.253	96.9926	95.6322	96.636	113.321	108.379	100.507	130.953	102.468	121.084	86.7651	88.1582	89.8966	94.1644	101.569	99.8728	120.846	105.894	102.334	90.5197	107.99	92.5795	89.5308	84.3813	98.3169	91.6224	92.8936	99.1913	97.3245	103.15	97.0143	89.0217	97.7291	111.203	102.683	111.775	87.9594	102.882	113.258	129.269
	105.012	99.9486	111.868	105.62	105.123	105.959	102.159	104.053	104.945	111.089	97.8216	95.6322	95.7328	112.344	108.379	100.507	130.953	103.262	118.48	87.6242	88.1582	90.8428	95.0445	101.569	99.8728	118.247	104.913	103.347	90.5197	107.302	92.5795	90.3675	85.423	98.3169	91.6224	92.3306	99.1913	96.6842	102.312	97.8095	89.8026	97.7291	111.203	102.683	111.775	91.1775	101.972	115.395	128.325
	103.501	99.3079	112.673	105.62	105.123	105.959	104.123	103.264	104.945	111.089	97.8216	96.3459	96.636	112.344	108.379	99.2816	130.173	104.057	114.574	89.3423	88.1582	90.8428	95.0445	99.7555	101.076	114.349	104.913	103.347	89.1482	107.302	92.5795	92.041	86.4648	99.2107	91.6224	92.3306	99.1913	97.3245	102.312	97.8095	89.8026	96.8793	110.211	101.911	112.515	92.2501	103.793	117.532	128.325
	103.501	98.6672	112.673	105.62	104.458	106.834	105.106	102.476	103.224	111.089	98.6506	96.3459	96.636	112.344	107.468	98.0559	130.173	104.851	113.272	89.3423	88.1582	91.7891	95.9245	99.7555	101.076	111.75	104.913	102.334	89.1482	106.614	93.5053	92.041	86.4648	98.3169	91.6224	92.3306	99.1913	96.6842	102.312	97.8095	89.8026	96.0294	110.211	101.139	112.515	93.3228	103.793	118.6	128.325
	104.257	98.6672	111.063	105.62	103.792	106.834	106.088	100.9	102.364	112.007	99.4796	97.0596	96.636	112.344	107.468	96.8302	129.394	105.645	111.97	89.3423	88.1582	90.8428	95.9245	99.7555	102.279	109.152	102.952	101.32	90.5197	107.302	92.5795	92.041	88.5483	98.3169	91.6224	92.3306	99.8801	96.6842	102.312	99.3999	91.3644	95.1796	110.211	101.139	113.255	95.4682	103.793	117.532	128.325
	105.768	98.6672	110.259	105.62	104.458	106.834	106.088	100.111	102.364	112.007	100.309	97.7732	96.636	113.321	106.557	95.6045	127.835	105.645	111.97	88.4832	87.5544	91.7891	95.9245	99.7555	102.279	107.852	102.952	102.334	90.5197	107.302	93.5053	91.2043	89.59	100.105	91.6224	92.8936	100.569	96.6842	102.312	99.3999	91.3644	96.0294	110.211	101.139	113.255	96.5408	105.614	115.395	129.269
	105.012	98.0265	110.259	105.62	103.792	106.834	104.123	100.111	102.364	112.007	101.138	98.4869	95.7328	114.298	106.557	94.3788	127.055	104.851	111.97	89.3423	86.9506	90.8428	95.0445	99.7555	103.483	107.852	104.913	102.334	90.5197	107.302	95.3569	90.3675	91.6735	101.892	93.1244	93.4566	101.258	96.6842	101.473	100.195	92.9262	96.8793	112.196	100.367	113.255	96.5408	105.614	112.189	129.269
	105.012	98.6672	111.063	106.391	103.792	106.834	101.176	100.111	102.364	111.089	101.967	98.4869	94.8297	113.321	107.468	93.1531	125.496	104.851	111.97	90.2014	86.9506	91.7891	95.0445	98.8486	103.483	107.852	105.894	102.334	91.8912	105.926	97.2085	90.3675	91.6735	103.68	93.8754	94.0196	101.258	97.3245	101.473	98.6047	94.488	98.5789	114.182	98.8228	112.515	95.4682	105.614	107.915	130.212
	105.012	99.9486	111.063	106.391	104.458	106.834	99.2119	100.111	104.945	111.089	101.138	98.4869	93.9266	111.367	108.379	94.3788	124.717	105.645	111.97	91.0604	86.9506	91.7891	95.9245	99.7555	104.686	106.553	107.855	102.334	91.8912	105.926	97.2085	90.3675	90.6318	103.68	95.3775	94.0196	101.258	96.6842	101.473	97.8095	95.2688	100.279	116.168	97.2787	112.515	94.3955	104.703	104.71	130.212
	104.257	100.589	109.454	107.162	104.458	106.834	97.2473	100.111	106.665	111.089	101.967	97.7732	93.9266	110.39	108.379	96.8302	123.937	105.645	113.272	91.9195	87.5544	92.7354	96.8045	99.7555	104.686	105.253	109.816	102.334	93.2627	104.551	97.2085	92.8777	89.59	103.68	95.3775	94.0196	101.258	96.6842	101.473	97.0143	96.0497	101.978	118.154	97.2787	113.255	93.3228	103.793	101.505	129.269
	102.746	100.589	107.039	106.391	103.792	107.71	97.2473	99.323	106.665	112.007	102.796	97.0596	94.8297	109.413	109.289	98.0559	123.158	105.645	113.272	91.9195	88.1582	91.7891	98.5646	100.662	102.279	106.553	111.777	102.334	91.8912	104.551	98.1343	92.041	87.5065	102.786	96.1285	94.0196	101.258	96.6842	103.15	97.0143	96.0497	101.978	119.147	98.0508	113.996	91.1775	105.614	98.2992	128.325
	103.501	101.871	105.43	104.849	103.127	106.834	98.2296	99.323	106.665	114.761	102.796	97.7732	94.8297	108.436	110.2	100.507	123.158	105.645	114.574	91.0604	88.762	91.7891	99.4447	101.569	101.076	106.553	113.738	102.334	91.8912	103.863	99.0601	91.2043	87.5065	101.892	95.3775	94.0196	100.569	96.6842	102.312	96.2191	96.0497	101.128	119.147	98.8228	114.736	91.1775	104.703	95.0937	127.381
	102.746	102.511	103.82	104.078	101.796	105.959	99.2119	101.688	107.525	115.679	102.796	97.7732	95.7328	108.436	111.111	102.959	123.937	107.234	114.574	91.9195	88.762	90.8428	102.085	101.569	99.8728	107.852	115.699	102.334	89.1482	104.551	98.1343	91.2043	86.4648	100.105	93.8754	93.4566	100.569	96.6842	103.15	96.2191	96.0497	100.279	118.154	98.8228	115.476	92.2501	105.614	92.9568	126.438
	102.746	103.152	103.82	102.536	101.131	105.959	100.194	103.264	106.665	115.679	102.796	98.4869	95.7328	107.459	109.289	104.184	124.717	108.028	114.574	91.0604	87.5544	90.8428	104.725	101.569	99.8728	106.553	117.66	102.334	87.7767	103.863	99.9858	91.2043	86.4648	100.105	92.3734	92.8936	99.8801	96.0439	103.15	95.4239	95.2688	99.4287	117.161	98.0508	116.956	94.3955	104.703	90.8199	124.551
	102.746	102.511	105.43	102.536	100.466	105.083	101.176	104.841	108.385	114.761	102.796	99.2006	95.7328	106.482	110.2	105.41	125.496	108.823	113.272	91.0604	87.5544	90.8428	106.485	101.569	98.6695	106.553	118.64	102.334	86.4051	103.175	99.0601	91.2043	86.4648	100.105	92.3734	92.3306	99.1913	96.0439	103.15	93.8335	95.2688	98.5789	115.175	97.2787	117.697	95.4682	104.703	90.8199	123.607
	102.746	102.511	107.844	101.765	99.8004	105.083	102.159	104.841	108.385	113.843	101.967	99.9142	96.636	105.506	110.2	105.41	126.276	109.617	110.668	90.2014	87.5544	92.7354	108.245	100.662	99.8728	106.553	117.66	102.334	85.0336	103.175	100.912	89.5308	85.423	100.105	92.3734	92.3306	99.8801	95.4036	103.989	94.6287	95.2688	98.5789	113.189	95.7346	117.697	96.5408	105.614	90.8199	122.664
	104.257	102.511	107.844	101.765	99.8004	105.083	104.123	104.053	108.385	112.925	101.967	99.2006	96.636	105.506	110.2	105.41	126.276	110.411	109.366	90.2014	87.5544	93.6817	110.005	100.662	99.8728	106.553	117.66	102.334	85.0336	103.863	99.9858	87.8573	85.423	100.105	90.8714	92.3306	100.569	94.7633	104.827	93.8335	96.8306	98.5789	110.211	94.9626	119.177	98.6862	105.614	90.8199	122.664
	104.257	101.871	107.844	102.536	100.466	105.083	105.106	103.264	107.525	112.925	101.967	99.2006	95.7328	106.482	110.2	105.41	126.276	109.617	109.366	88.4832	88.1582	93.6817	110.005	100.662	99.8728	105.253	116.679	102.334	85.0336	103.175	100.912	87.8573	85.423	99.2107	90.1204	93.4566	101.258	94.7633	105.666	93.0383	98.3924	99.4287	108.225	94.9626	119.177	97.6135	106.524	90.8199	123.607
	106.523	100.589	107.039	103.307	100.466	104.207	105.106	103.264	106.665	112.007	101.138	98.4869	94.8297	106.482	110.2	106.636	126.276	108.823	110.668	88.4832	88.1582	93.6817	109.125	100.662	98.6695	106.553	116.679	102.334	85.0336	103.175	99.9858	87.8573	85.423	99.2107	88.6184	94.0196	100.569	94.7633	106.505	93.8335	99.9542	99.4287	108.225	94.9626	119.177	97.6135	107.435	91.8883	125.494
	105.768	99.9486	106.235	104.078	100.466	104.207	105.106	103.264	106.665	111.089	100.309	97.0596	94.8297	105.506	108.379	107.861	126.276	108.028	111.97	89.3423	88.762	93.6817	109.125	100.662	98.6695	106.553	114.718	101.32	85.0336	102.487	99.0601	88.6941	85.423	99.2107	89.3694	94.0196	99.8801	95.4036	105.666	93.8335	100.735	99.4287	108.225	94.9626	119.177	97.6135	108.345	90.8199	127.381
	105.768	99.3079	106.235	104.849	100.466	105.083	104.123	103.264	106.665	111.089	100.309	97.0596	94.8297	106.482	107.468	109.087	126.276	107.234	113.272	90.2014	89.3659	92.7354	110.005	101.569	97.4662	106.553	114.718	101.32	86.4051	102.487	98.1343	87.0206	85.423	99.2107	90.1204	93.4566	99.8801	95.4036	104.827	93.8335	102.297	99.4287	110.211	95.7346	119.177	97.6135	108.345	90.8199	129.269
	105.012	98.6672	106.235	104.849	100.466	105.959	103.141	104.053	107.525	111.089	100.309	96.3459	93.9266	108.436	106.557	109.087	127.055	107.234	113.272	91.0604	89.3659	92.7354	110.005	102.476	97.4662	105.253	115.699	100.307	86.4051	102.487	97.2085	87.0206	85.423	99.2107	90.8714	92.8936	101.258	96.0439	104.827	93.8335	102.297	100.279	112.196	96.5067	119.177	98.6862	107.435	90.8199	130.212
	105.768	98.6672	107.039	104.849	101.131	104.207	103.141	104.053	108.385	111.089	100.309	96.3459	93.9266	110.39	107.468	109.087	127.055	108.028	114.574	91.0604	89.3659	92.7354	110.885	103.383	98.6695	107.852	116.679	100.307	86.4051	101.799	97.2085	87.0206	85.423	98.3169	91.6224	92.8936	101.258	96.6842	104.827	94.6287	102.297	101.128	113.189	95.7346	119.917	98.6862	106.524	90.8199	131.156
	107.279	99.3079	107.844	104.849	100.466	102.456	104.123	104.841	109.246	110.171	100.309	96.3459	93.9266	110.39	108.379	107.861	127.835	108.028	114.574	91.9195	88.1582	92.7354	109.125	104.29	98.6695	107.852	116.679	100.307	87.7767	100.424	97.2085	88.6941	85.423	96.5294	93.1244	93.4566	101.258	97.3245	103.15	94.6287	102.297	101.128	115.175	95.7346	119.177	98.6862	105.614	90.8199	132.099
	107.279	99.3079	107.844	104.849	101.131	102.456	104.123	104.053	108.385	110.171	100.309	97.0596	94.8297	110.39	110.2	107.861	129.394	108.028	114.574	92.7785	88.1582	92.7354	106.485	105.197	99.8728	109.152	115.699	100.307	89.1482	99.7358	97.2085	91.2043	84.3813	95.6356	93.1244	94.5826	101.258	97.3245	102.312	95.4239	101.516	101.128	115.175	95.7346	118.437	98.6862	104.703	90.8199	132.099
	107.279	98.6672	107.844	104.849	101.796	101.58	104.123	104.841	108.385	110.171	100.309	97.7732	94.8297	111.367	110.2	107.861	130.173	108.028	111.97	92.7785	87.5544	91.7891	103.845	106.104	99.8728	109.152	114.718	101.32	89.1482	99.7358	96.2827	92.8777	83.3396	96.5294	93.8754	95.1456	101.258	97.3245	101.473	94.6287	101.516	101.128	115.175	95.7346	117.697	98.6862	104.703	90.8199	132.099
	106.523	98.6672	106.235	104.849	103.127	100.704	104.123	105.629	108.385	110.171	101.138	99.9142	93.9266	112.344	108.379	107.861	130.173	108.028	110.668	92.7785	86.9506	91.7891	102.965	106.104	101.076	107.852	112.757	102.334	89.1482	99.0479	95.3569	93.7145	83.3396	96.5294	94.6264	94.5826	101.947	96.0439	99.7958	95.4239	101.516	101.128	114.182	95.7346	116.956	97.6135	103.793	94.0253	132.099
	107.279	98.6672	104.625	104.078	104.458	100.704	105.106	105.629	110.106	109.253	101.138	99.2006	93.9266	113.321	107.468	109.087	130.173	108.823	110.668	91.9195	86.9506	92.7354	102.965	106.104	99.8728	106.553	112.757	103.347	89.1482	99.0479	94.4311	94.5512	84.3813	97.4231	94.6264	94.5826	101.947	95.4036	100.634	94.6287	101.516	101.978	114.182	95.7346	116.216	96.5408	103.793	97.2307	131.156
	106.523	98.6672	104.625	102.536	105.123	101.58	107.07	104.841	110.966	108.335	101.138	99.9142	93.0234	113.321	104.736	109.087	130.173	109.617	109.366	91.9195	86.3468	92.7354	104.725	107.01	99.8728	102.654	114.718	104.36	90.5197	98.3601	94.4311	94.5512	86.4648	98.3169	94.6264	94.0196	101.947	95.4036	103.15	94.6287	102.297	101.978	114.182	94.9626	114.736	96.5408	104.703	98.2992	131.156
	107.279	98.6672	105.43	102.536	105.788	100.704	106.088	105.629	112.686	107.417	101.967	99.9142	92.1203	114.298	104.736	110.313	130.173	110.411	109.366	91.9195	86.3468	92.7354	105.605	107.917	99.8728	102.654	117.66	105.373	90.5197	99.0479	93.5053	92.8777	87.5065	101.892	95.3775	93.4566	101.947	95.4036	105.666	94.6287	102.297	102.828	113.189	93.4185	113.996	95.4682	104.703	98.2992	131.156
	107.279	99.9486	107.039	102.536	106.454	100.704	106.088	107.206	112.686	107.417	101.138	99.2006	93.0234	114.298	103.825	110.313	130.173	112	109.366	91.9195	86.3468	91.7891	108.245	107.917	99.8728	102.654	117.66	106.386	93.2627	98.3601	93.5053	91.2043	87.5065	106.361	94.6264	94.0196	101.258	94.7633	107.343	96.2191	102.297	102.828	112.196	91.8744	113.255	94.3955	105.614	98.2992	132.099
	107.279	100.589	109.454	101.765	106.454	100.704	106.088	107.994	111.826	106.498	101.138	99.2006	92.1203	112.344	103.825	111.539	130.173	112	106.762	91.9195	86.9506	90.8428	108.245	107.917	99.8728	102.654	117.66	106.386	94.6342	99.0479	93.5053	90.3675	88.5483	113.511	95.3775	94.0196	101.258	94.7633	109.021	97.8095	102.297	102.828	111.203	92.6464	112.515	93.3228	105.614	98.2992	132.099
	108.034	101.23	110.259	102.536	107.119	100.704	106.088	108.782	110.106	106.498	100.309	98.4869	93.0234	110.39	104.736	112.764	129.394	112	104.158	91.0604	88.762	90.8428	108.245	107.01	98.6695	102.654	117.66	107.4	94.6342	97.6723	93.5053	90.3675	88.5483	120.662	94.6264	94.0196	101.258	95.4036	109.859	97.8095	102.297	103.678	111.203	93.4185	112.515	93.3228	106.524	100.436	132.099
	108.789	102.511	110.259	103.307	106.454	100.704	106.088	108.782	108.385	107.417	100.309	98.4869	93.0234	112.344	105.646	113.99	130.173	111.206	102.856	92.7785	89.9697	90.8428	107.365	106.104	98.6695	102.654	115.699	107.4	96.0057	97.6723	95.3569	91.2043	87.5065	125.131	95.3775	92.8936	101.947	94.7633	110.698	98.6047	103.078	103.678	111.203	94.1905	112.515	93.3228	108.345	100.436	133.043
	108.034	103.793	108.649	104.078	105.788	100.704	107.07	107.206	109.246	107.417	100.309	97.7732	93.0234	114.298	105.646	113.99	130.953	110.411	101.554	91.9195	90.5735	91.7891	106.485	104.29	97.4662	101.355	113.738	108.413	96.0057	97.6723	94.4311	92.8777	85.423	124.237	96.1285	92.3306	101.947	94.7633	112.375	99.3999	103.078	103.678	111.203	95.7346	111.775	92.2501	105.614	101.505	133.043
	108.789	105.074	108.649	104.849	105.123	99.8288	109.035	107.206	109.246	107.417	100.309	97.7732	93.0234	116.251	105.646	113.99	131.732	109.617	101.554	91.9195	90.5735	91.7891	104.725	103.383	96.2629	102.654	111.777	107.4	97.3772	99.0479	92.5795	92.8777	84.3813	117.98	96.1285	92.3306	101.258	94.7633	113.214	99.3999	104.64	102.828	112.196	96.5067	111.775	92.2501	105.614	101.505	132.099
	108.034	105.074	108.649	105.62	104.458	100.704	109.035	107.206	110.106	106.498	101.138	97.0596	92.1203	116.251	105.646	115.216	131.732	109.617	100.252	91.9195	91.1773	91.7891	103.845	103.383	96.2629	100.056	109.816	106.386	97.3772	97.6723	92.5795	93.7145	82.2978	110.83	95.3775	92.3306	100.569	95.4036	114.891	99.3999	106.201	102.828	113.189	97.2787	111.775	91.1775	105.614	100.436	131.156
	108.034	105.715	107.039	106.391	103.792	101.58	109.035	106.418	110.106	106.498	101.138	96.3459	92.1203	115.275	105.646	115.216	131.732	108.823	100.252	91.9195	91.7812	90.8428	103.845	102.476	97.4662	101.355	108.835	105.373	94.6342	97.6723	91.6537	94.5512	81.2561	103.68	95.3775	91.7676	100.569	94.7633	114.052	100.195	107.763	102.828	113.189	99.5949	111.775	91.1775	106.524	99.3676	130.212
	108.789	105.074	107.844	105.62	102.462	101.58	108.053	105.629	111.826	106.498	101.138	95.6322	92.1203	114.298	102.914	115.216	131.732	108.028	101.554	91.0604	92.385	89.8966	102.965	102.476	97.4662	100.056	107.855	103.347	93.2627	96.9844	90.7279	95.388	80.2143	99.2107	94.6264	92.3306	100.569	95.4036	114.052	100.195	108.544	101.978	114.182	102.683	111.775	92.2501	105.614	99.3676	128.325
	108.789	104.433	108.649	105.62	101.796	102.456	106.088	104.841	110.106	106.498	101.138	95.6322	92.1203	113.321	102.914	113.99	132.512	106.44	101.554	91.0604	91.7812	88.9503	102.965	102.476	97.4662	100.056	106.874	101.32	90.5197	96.9844	89.8021	95.388	80.2143	98.3169	93.8754	91.7676	100.569	96.0439	114.052	100.195	107.763	101.978	114.182	104.999	111.775	92.2501	105.614	99.3676	126.438
	108.034	104.433	109.454	104.078	102.462	103.332	104.123	104.053	110.106	107.417	101.138	95.6322	92.1203	111.367	102.003	113.99	132.512	105.645	104.158	91.9195	91.1773	88.9503	101.205	101.569	97.4662	102.654	106.874	101.32	89.1482	96.9844	88.8763	95.388	81.2561	98.3169	93.1244	91.7676	100.569	96.0439	114.891	100.99	106.982	101.128	116.168	104.999	111.775	93.3228	105.614	98.2992	125.494
	107.279	104.433	109.454	103.307	103.127	104.207	103.141	103.264	109.246	108.335	100.309	95.6322	93.0234	108.436	101.093	113.99	131.732	106.44	104.158	91.9195	89.9697	88.004	100.325	101.569	97.4662	102.654	106.874	100.307	89.1482	96.9844	88.8763	96.2247	82.2978	99.2107	92.3734	92.3306	100.569	96.0439	114.891	100.195	106.982	100.279	116.168	103.455	111.775	93.3228	104.703	96.1622	124.551
	108.034	104.433	109.454	102.536	103.127	105.083	103.141	102.476	108.385	109.253	100.309	97.0596	93.0234	108.436	101.093	113.99	130.173	107.234	104.158	92.7785	88.762	88.004	100.325	101.569	97.4662	101.355	107.855	100.307	90.5197	96.2966	88.8763	96.2247	84.3813	100.105	93.1244	92.3306	101.258	95.4036	114.891	100.195	106.982	99.4287	117.161	102.683	110.294	92.2501	107.435	95.0937	124.551
	108.034	105.074	110.259	103.307	103.792	105.083	103.141	102.476	108.385	110.171	99.4796	97.7732	93.0234	107.459	101.093	113.99	130.173	108.028	105.46	93.6376	88.1582	88.004	101.205	101.569	96.2629	101.355	106.874	100.307	91.8912	95.6088	89.8021	95.388	86.4648	100.998	93.1244	92.3306	101.258	95.4036	114.891	98.6047	106.982	98.5789	117.161	101.911	109.554	92.2501	107.435	95.0937	124.551
	108.789	106.356	111.063	104.078	103.792	105.959	102.159	102.476	110.106	112.007	98.6506	97.7732	93.0234	108.436	102.003	112.764	130.173	108.028	105.46	92.7785	88.1582	88.004	102.965	101.569	96.2629	101.355	105.894	100.307	93.2627	96.2966	89.8021	94.5512	87.5065	101.892	92.3734	92.8936	101.258	95.4036	114.052	98.6047	106.982	97.7291	117.161	101.911	109.554	94.3955	110.166	95.0937	125.494
	108.034	105.715	111.063	105.62	104.458	106.834	102.159	103.264	110.106	112.007	98.6506	98.4869	93.0234	109.413	101.093	112.764	129.394	107.234	105.46	91.9195	88.762	87.0577	104.725	102.476	95.0597	102.654	104.913	101.32	93.2627	96.2966	88.8763	92.8777	88.5483	102.786	91.6224	93.4566	101.258	95.4036	112.375	97.8095	106.982	98.5789	117.161	101.911	108.814	95.4682	111.987	95.0937	126.438
	108.789	106.356	111.063	105.62	105.123	108.586	103.141	103.264	110.966	111.089	99.4796	98.4869	92.1203	110.39	101.093	110.313	129.394	108.028	105.46	90.2014	89.3659	87.0577	105.605	102.476	95.0597	105.253	104.913	101.32	94.6342	96.2966	89.8021	93.7145	89.59	101.892	91.6224	92.8936	101.258	94.7633	109.859	97.8095	105.42	98.5789	118.154	101.911	108.074	95.4682	112.897	95.0937	126.438
	107.279	106.356	111.868	105.62	105.123	109.461	103.141	104.053	110.966	108.335	100.309	97.7732	91.2171	110.39	102.003	107.861	129.394	108.028	106.762	89.3423	89.9697	87.0577	106.485	102.476	95.0597	107.852	103.933	101.32	94.6342	96.2966	88.8763	93.7145	88.5483	101.892	90.8714	93.4566	101.947	94.7633	109.021	97.8095	104.64	98.5789	118.154	101.911	107.333	94.3955	112.897	95.0937	125.494
	106.523	106.356	110.259	104.849	105.123	109.461	104.123	104.053	110.106	105.58	101.138	97.0596	91.2171	109.413	102.003	105.41	129.394	108.028	108.064	89.3423	90.5735	87.0577	107.365	102.476	93.8564	110.451	103.933	101.32	94.6342	96.9844	88.8763	94.5512	88.5483	100.998	90.8714	94.0196	101.947	95.4036	109.021	97.8095	103.859	98.5789	118.154	102.683	106.593	94.3955	112.897	95.0937	125.494
	105.768	106.356	109.454	104.849	105.123	107.71	105.106	103.264	108.385	104.662	100.309	96.3459	91.2171	109.413	102.914	105.41	127.835	108.028	106.762	89.3423	90.5735	88.004	108.245	100.662	93.8564	111.75	103.933	99.294	94.6342	96.9844	88.8763	94.5512	87.5065	100.105	93.1244	94.5826	102.635	95.4036	109.021	97.0143	103.859	98.5789	118.154	103.455	107.333	96.5408	113.808	97.2307	125.494
	106.523	105.715	109.454	104.849	105.788	107.71	105.106	102.476	106.665	103.744	100.309	97.0596	91.2171	111.367	102.914	106.636	127.055	107.234	106.762	89.3423	90.5735	88.004	108.245	100.662	92.6531	110.451	103.933	99.294	96.0057	96.9844	88.8763	94.5512	87.5065	100.998	92.3734	94.5826	103.324	95.4036	109.021	96.2191	103.078	98.5789	118.154	103.455	107.333	97.6135	114.718	99.3676	125.494
	105.012	105.715	109.454	104.849	105.123	106.834	104.123	101.688	105.805	103.744	99.4796	97.7732	91.2171	113.321	104.736	109.087	127.055	107.234	106.762	89.3423	89.9697	88.004	108.245	99.7555	93.8564	106.553	102.952	99.294	94.6342	96.2966	89.8021	93.7145	87.5065	100.105	93.8754	94.5826	103.324	96.0439	108.182	96.2191	103.078	98.5789	118.154	102.683	107.333	97.6135	113.808	100.436	125.494
	105.012	105.074	108.649	104.078	104.458	107.71	103.141	100.9	104.945	105.58	98.6506	98.4869	91.2171	112.344	104.736	109.087	127.835	108.823	108.064	90.2014	89.3659	87.0577	107.365	99.7555	93.8564	105.253	102.952	99.294	96.0057	96.2966	89.8021	93.7145	87.5065	99.2107	93.1244	94.0196	102.635	96.0439	107.343	96.2191	102.297	97.7291	118.154	101.911	107.333	96.5408	114.718	101.505	125.494
	105.768	104.433	109.454	104.849	103.792	108.586	102.159	100.9	104.945	106.498	98.6506	98.4869	91.2171	111.367	104.736	110.313	127.835	110.411	109.366	90.2014	89.3659	86.1114	107.365	99.7555	93.8564	103.954	101.972	99.294	96.0057	95.6088	90.7279	92.8777	85.423	99.2107	93.1244	93.4566	101.947	96.0439	106.505	97.0143	102.297	96.8793	119.147	101.139	107.333	96.5408	114.718	101.505	125.494
	105.012	103.793	108.649	104.078	104.458	108.586	102.159	100.9	105.805	107.417	98.6506	97.7732	91.2171	109.413	105.646	110.313	128.614	111.206	109.366	91.0604	89.3659	86.1114	107.365	99.7555	95.0597	105.253	101.972	99.294	96.0057	95.6088	89.8021	92.041	84.3813	98.3169	93.1244	92.3306	100.569	96.0439	104.827	97.0143	102.297	96.0294	120.139	101.139	108.074	97.6135	114.718	104.71	124.551
	104.257	103.793	107.844	104.078	104.458	109.461	102.159	100.9	104.084	108.335	98.6506	97.7732	92.1203	107.459	107.468	110.313	128.614	112	106.762	91.0604	89.9697	87.0577	108.245	100.662	96.2629	105.253	101.972	99.294	94.6342	95.6088	89.8021	91.2043	83.3396	98.3169	93.1244	92.8936	99.8801	96.0439	103.15	97.0143	99.9542	96.0294	120.139	99.5949	108.814	97.6135	115.629	107.915	123.607
	102.746	104.433	108.649	103.307	104.458	109.461	102.159	101.688	104.945	109.253	97.8216	98.4869	92.1203	107.459	106.557	111.539	129.394	112	104.158	91.0604	90.5735	88.004	108.245	100.662	96.2629	105.253	102.952	98.2807	94.6342	95.6088	88.8763	89.5308	82.2978	98.3169	91.6224	92.8936	99.1913	96.0439	101.473	97.0143	98.3924	96.8793	119.147	97.2787	108.814	98.6862	115.629	111.121	122.664
	102.746	104.433	108.649	102.536	105.123	108.586	103.141	101.688	104.945	109.253	98.6506	98.4869	92.1203	107.459	106.557	110.313	130.173	112	102.856	91.0604	91.1773	88.9503	109.125	100.662	96.2629	103.954	102.952	98.2807	94.6342	96.2966	89.8021	88.6941	82.2978	98.3169	93.1244	93.4566	98.5025	96.0439	99.7958	97.0143	96.8306	97.7291	119.147	95.7346	108.074	99.7589	115.629	112.189	122.664
	102.746	103.793	107.844	101.765	105.788	108.586	103.141	100.9	104.945	109.253	98.6506	99.2006	93.0234	107.459	107.468	109.087	130.953	112	102.856	91.0604	91.1773	90.8428	108.245	99.7555	96.2629	103.954	103.933	98.2807	96.0057	96.2966	90.7279	87.8573	83.3396	98.3169	93.1244	94.5826	97.8136	96.0439	98.9571	96.2191	96.8306	98.5789	119.147	94.1905	108.074	100.832	115.629	112.189	122.664
	101.99	103.793	107.844	100.994	105.788	109.461	103.141	100.9	104.945	109.253	98.6506	99.2006	93.9266	107.459	106.557	107.861	131.732	111.206	105.46	91.0604	90.5735	91.7891	109.125	99.7555	93.8564	105.253	101.972	98.2807	98.7487	96.2966	92.5795	88.6941	84.3813	99.2107	93.8754	95.1456	97.1248	96.0439	100.634	95.4239	96.8306	98.5789	117.161	92.6464	107.333	99.7589	117.45	112.189	124.551
	102.746	103.793	107.039	100.994	105.788	108.586	104.123	100.111	104.084	109.253	99.4796	99.9142	94.8297	108.436	105.646	106.636	130.953	110.411	108.064	90.2014	90.5735	92.7354	108.245	99.7555	91.4498	105.253	100.991	98.2807	101.492	96.2966	92.5795	88.6941	84.3813	99.2107	93.1244	95.7086	97.1248	95.4036	100.634	93.8335	97.6115	99.4287	115.175	91.1023	107.333	98.6862	117.45	112.189	125.494
	101.99	104.433	106.235	101.765	106.454	108.586	105.106	100.111	104.084	109.253	99.4796	99.2006	94.8297	108.436	106.557	105.41	129.394	108.028	108.064	89.3423	89.9697	93.6817	108.245	99.7555	91.4498	105.253	100.011	99.294	101.492	96.9844	93.5053	88.6941	84.3813	98.3169	93.1244	95.7086	97.1248	95.4036	102.312	93.8335	97.6115	99.4287	112.196	90.3302	107.333	96.5408	117.45	111.121	124.551
	101.99	105.074	106.235	102.536	106.454	109.461	105.106	101.688	104.084	109.253	100.309	99.2006	94.8297	107.459	108.379	104.184	127.055	107.234	108.064	88.4832	89.9697	93.6817	107.365	100.662	92.6531	105.253	99.0303	100.307	101.492	96.2966	94.4311	88.6941	85.423	97.4231	92.3734	95.7086	97.8136	94.7633	103.15	93.0383	96.8306	100.279	110.211	89.5582	106.593	96.5408	117.45	111.121	123.607
	101.99	105.715	107.039	103.307	105.788	109.461	106.088	101.688	103.224	109.253	99.4796	99.9142	93.9266	106.482	108.379	102.959	126.276	106.44	109.366	87.6242	89.9697	93.6817	105.605	101.569	93.8564	106.553	99.0303	101.32	101.492	97.6723	97.2085	87.8573	87.5065	98.3169	92.3734	94.5826	99.1913	94.123	103.15	93.8335	96.8306	101.128	109.218	90.3302	106.593	95.4682	117.45	111.121	122.664
	102.746	105.715	107.039	104.849	105.123	108.586	106.088	102.476	103.224	108.335	100.309	99.9142	93.9266	104.529	109.289	101.733	125.496	107.234	109.366	87.6242	89.9697	93.6817	103.845	101.569	95.0597	107.852	98.0498	101.32	100.12	98.3601	98.1343	87.0206	88.5483	100.105	92.3734	94.5826	100.569	94.123	103.15	93.8335	96.8306	101.978	107.232	91.8744	105.853	93.3228	119.271	110.052	122.664
	102.746	105.074	106.235	105.62	105.123	107.71	106.088	104.053	102.364	108.335	99.4796	99.9142	93.9266	103.552	108.379	100.507	124.717	106.44	109.366	87.6242	89.9697	93.6817	102.085	101.569	97.4662	109.152	97.0693	102.334	98.7487	97.6723	99.0601	87.0206	88.5483	100.998	92.3734	94.0196	101.258	94.123	103.989	93.0383	98.3924	101.978	107.232	94.1905	105.853	93.3228	118.36	108.984	123.607
	103.501	105.074	106.235	105.62	105.123	108.586	105.106	104.053	102.364	108.335	99.4796	99.9142	93.0234	103.552	107.468	101.733	124.717	105.645	106.762	88.4832	89.9697	92.7354	99.4447	101.569	97.4662	110.451	96.0888	102.334	97.3772	97.6723	97.2085	87.8573	88.5483	101.892	92.3734	94.0196	101.258	93.4827	103.989	93.8335	99.9542	102.828	106.239	95.7346	106.593	94.3955	118.36	108.984	123.607
	105.012	105.715	106.235	105.62	105.123	108.586	104.123	103.264	101.504	108.335	99.4796	99.9142	93.9266	105.506	107.468	101.733	124.717	104.851	106.762	89.3423	89.9697	92.7354	96.8045	101.569	98.6695	110.451	95.1083	102.334	93.2627	98.3601	96.2827	87.0206	87.5065	102.786	91.6224	93.4566	101.258	93.4827	105.666	93.0383	100.735	102.828	106.239	96.5067	106.593	96.5408	117.45	107.915	123.607
	105.012	105.074	106.235	106.391	105.123	109.461	103.141	102.476	101.504	109.253	99.4796	99.2006	93.9266	105.506	108.379	102.959	125.496	104.851	108.064	90.2014	89.9697	92.7354	95.0445	101.569	97.4662	111.75	95.1083	102.334	93.2627	97.6723	97.2085	87.0206	87.5065	102.786	91.6224	92.8936	101.258	93.4827	105.666	93.8335	101.516	102.828	106.239	96.5067	106.593	96.5408	115.629	107.915	123.607
	105.768	105.074	107.844	105.62	105.123	107.71	103.141	102.476	101.504	109.253	99.4796	98.4869	93.9266	106.482	109.289	102.959	126.276	104.851	110.668	90.2014	90.5735	91.7891	94.1644	101.569	96.2629	109.152	97.0693	102.334	94.6342	98.3601	97.2085	86.1839	88.5483	101.892	91.6224	92.3306	101.258	93.4827	105.666	94.6287	103.078	102.828	107.232	98.0508	107.333	95.4682	115.629	108.984	122.664
	105.768	104.433	107.844	104.849	105.123	105.959	102.159	101.688	102.364	109.253	100.309	97.7732	94.8297	107.459	109.289	100.507	125.496	103.262	111.97	90.2014	90.5735	90.8428	93.2844	100.662	95.0597	106.553	97.0693	102.334	91.8912	98.3601	95.3569	87.0206	88.5483	101.892	90.8714	92.8936	100.569	93.4827	103.989	94.6287	103.859	101.128	107.232	98.8228	107.333	95.4682	114.718	110.052	122.664
	105.768	105.715	108.649	104.078	104.458	105.083	102.159	102.476	102.364	108.335	101.138	97.7732	94.8297	107.459	109.289	96.8302	125.496	102.468	113.272	90.2014	89.3659	88.9503	93.2844	101.569	93.8564	105.253	97.0693	102.334	90.5197	98.3601	93.5053	86.1839	88.5483	101.892	90.8714	94.0196	100.569	93.4827	103.989	93.8335	105.42	100.279	106.239	99.5949	108.074	94.3955	114.718	110.052	124.551
	106.523	105.715	107.844	104.078	103.792	105.083	103.141	101.688	102.364	108.335	101.138	97.7732	94.8297	106.482	109.289	93.1531	124.717	101.674	113.272	89.3423	88.762	88.004	94.1644	101.569	93.8564	103.954	98.0498	102.334	91.8912	97.6723	92.5795	87.0206	88.5483	100.998	91.6224	94.5826	99.8801	93.4827	103.989	94.6287	106.201	100.279	105.246	101.139	108.814	94.3955	115.629	110.052	124.551
	106.523	105.715	107.039	103.307	103.127	104.207	103.141	101.688	102.364	107.417	101.967	97.7732	94.8297	106.482	110.2	91.9274	123.937	102.468	110.668	89.3423	88.1582	88.004	93.2844	101.569	92.6531	102.654	99.0303	102.334	91.8912	96.9844	91.6537	87.0206	87.5065	99.2107	90.8714	94.5826	99.8801	93.4827	106.505	97.0143	106.982	100.279	106.239	101.139	109.554	94.3955	115.629	107.915	125.494
	106.523	105.715	107.039	102.536	102.462	103.332	104.123	102.476	103.224	107.417	102.796	98.4869	95.7328	107.459	109.289	91.9274	123.158	103.262	106.762	88.4832	88.1582	86.1114	94.1644	101.569	92.6531	102.654	100.011	103.347	93.2627	96.9844	90.7279	87.8573	86.4648	98.3169	90.1204	95.1456	100.569	93.4827	106.505	97.0143	106.201	101.128	106.239	99.5949	109.554	95.4682	115.629	106.847	127.381
	106.523	105.715	107.039	101.765	102.462	104.207	103.141	102.476	104.945	106.498	102.796	99.2006	94.8297	107.459	108.379	91.9274	123.158	103.262	106.762	88.4832	88.1582	85.1652	95.9245	102.476	91.4498	100.056	100.991	104.36	93.2627	96.2966	89.8021	87.0206	86.4648	98.3169	90.1204	94.5826	100.569	94.123	108.182	95.4239	103.859	101.978	106.239	98.8228	109.554	95.4682	116.539	103.641	128.325
	105.768	105.074	106.235	101.765	101.796	105.083	103.141	103.264	104.084	106.498	102.796	99.9142	94.8297	106.482	107.468	93.1531	123.158	102.468	106.762	89.3423	88.1582	85.1652	97.6846	101.569	91.4498	98.7561	101.972	105.373	94.6342	95.6088	88.8763	87.0206	85.423	96.5294	89.3694	94.0196	99.8801	94.123	107.343	96.2191	103.859	101.978	106.239	97.2787	109.554	97.6135	116.539	100.436	128.325
	106.523	105.074	107.844	101.765	101.131	105.083	102.159	104.053	104.084	107.417	102.796	99.9142	94.8297	104.529	107.468	94.3788	123.158	102.468	106.762	89.3423	88.1582	85.1652	98.5646	101.569	90.2465	97.4567	103.933	106.386	94.6342	94.9209	88.8763	87.0206	83.3396	96.5294	90.1204	93.4566	98.5025	94.123	105.666	97.0143	103.078	101.978	105.246	97.2787	109.554	97.6135	118.36	98.2992	128.325
	105.012	105.074	108.649	101.765	100.466	105.959	102.159	104.841	104.084	108.335	102.796	99.9142	94.8297	103.552	107.468	96.8302	122.378	102.468	108.064	89.3423	88.1582	86.1114	100.325	100.662	89.0432	97.4567	104.913	105.373	96.0057	94.9209	88.8763	87.0206	82.2978	97.4231	89.3694	93.4566	97.1248	94.123	105.666	96.2191	103.859	101.978	106.239	96.5067	109.554	99.7589	117.45	98.2992	128.325
	104.257	105.715	110.259	102.536	99.8004	106.834	103.141	104.841	104.084	108.335	101.967	99.9142	94.8297	101.598	108.379	99.2816	121.599	100.879	109.366	88.4832	88.1582	87.0577	101.205	100.662	89.0432	96.1573	105.894	105.373	96.0057	95.6088	88.8763	87.8573	82.2978	98.3169	90.8714	92.8936	96.436	94.123	104.827	96.2191	104.64	101.128	107.232	96.5067	110.294	99.7589	116.539	97.2307	127.381
	103.501	105.715	111.063	102.536	99.8004	107.71	103.141	105.629	103.224	108.335	101.138	99.2006	94.8297	102.575	108.379	101.733	120.819	100.879	109.366	90.2014	88.1582	88.004	101.205	100.662	89.0432	94.8579	107.855	104.36	94.6342	96.2966	89.8021	87.8573	82.2978	99.2107	90.8714	92.8936	95.7472	93.4827	103.989	95.4239	104.64	101.128	108.225	98.0508	110.294	98.6862	115.629	97.2307	127.381
	101.235	106.996	111.868	101.765	100.466	106.834	104.123	105.629	103.224	109.253	101.138	99.2006	94.8297	102.575	108.379	104.184	120.04	100.879	109.366	91.9195	88.762	88.9503	102.085	100.662	91.4498	94.8579	106.874	103.347	94.6342	96.2966	90.7279	87.8573	83.3396	100.105	91.6224	93.4566	95.7472	93.4827	103.15	96.2191	104.64	101.128	109.218	100.367	110.294	98.6862	115.629	96.1622	126.438
	101.235	106.996	111.868	100.994	100.466	106.834	105.106	105.629	103.224	110.171	100.309	98.4869	95.7328	102.575	109.289	104.184	118.481	100.879	109.366	93.6376	89.3659	89.8966	102.085	100.662	92.6531	94.8579	106.874	102.334	94.6342	96.2966	90.7279	87.0206	85.423	99.2107	93.1244	93.4566	95.7472	93.4827	101.473	95.4239	103.859	101.978	110.211	102.683	110.294	98.6862	113.808	96.1622	125.494
	101.235	107.637	111.868	100.223	101.131	106.834	105.106	104.841	101.504	111.089	100.309	99.2006	95.7328	100.621	107.468	104.184	117.701	101.674	109.366	93.6376	89.9697	89.8966	100.325	101.569	93.8564	94.8579	105.894	101.32	93.2627	96.2966	90.7279	86.1839	86.4648	99.2107	90.8714	94.0196	95.7472	93.4827	100.634	95.4239	103.859	102.828	110.211	103.455	110.294	97.6135	113.808	97.2307	124.551
	101.99	108.278	111.868	99.4525	101.131	106.834	105.106	104.053	101.504	110.171	100.309	99.2006	95.7328	100.621	107.468	102.959	116.142	101.674	109.366	94.4967	90.5735	88.9503	98.5646	100.662	95.0597	94.8579	105.894	100.307	91.8912	96.9844	90.7279	85.3471	88.5483	97.4231	91.6224	93.4566	96.436	93.4827	98.9571	95.4239	103.078	103.678	109.218	102.683	110.294	97.6135	113.808	97.2307	123.607
	102.746	108.278	111.868	99.4525	101.131	105.959	104.123	104.841	102.364	109.253	98.6506	99.9142	95.7328	101.598	106.557	101.733	115.363	101.674	109.366	93.6376	91.1773	88.004	96.8045	99.7555	96.2629	93.5585	106.874	99.294	93.2627	95.6088	90.7279	84.5104	88.5483	96.5294	91.6224	92.8936	95.7472	92.8424	99.7958	95.4239	102.297	105.377	108.225	101.911	109.554	97.6135	114.718	97.2307	121.72
	101.99	108.278	111.063	100.223	101.796	105.083	103.141	104.841	102.364	109.253	97.8216	100.628	95.7328	103.552	107.468	101.733	115.363	100.879	108.064	92.7785	91.1773	88.004	95.9245	98.8486	95.0597	93.5585	107.855	98.2807	93.2627	95.6088	89.8021	84.5104	88.5483	95.6356	91.6224	92.3306	95.7472	92.2021	98.9571	93.8335	102.297	106.227	108.225	101.139	108.814	97.6135	116.539	98.2992	119.833
	100.479	108.278	111.063	100.994	101.131	105.083	103.141	104.841	104.084	110.171	96.9926	102.055	95.7328	105.506	107.468	101.733	115.363	100.085	108.064	91.9195	91.1773	88.004	94.1644	98.8486	93.8564	90.9596	108.835	97.2675	93.2627	95.6088	88.8763	86.1839	87.5065	93.848	91.6224	92.3306	95.0583	92.2021	98.9571	93.8335	102.297	106.227	107.232	100.367	108.814	96.5408	117.45	96.1622	118.889
	100.479	107.637	111.868	100.223	101.131	105.959	104.123	104.053	102.364	112.007	96.9926	102.769	95.7328	106.482	107.468	101.733	116.142	100.879	109.366	91.0604	91.1773	88.004	93.2844	100.662	92.6531	90.9596	108.835	97.2675	94.6342	94.9209	87.9505	87.8573	86.4648	92.9542	93.1244	92.3306	95.0583	91.5619	99.7958	93.8335	102.297	106.227	106.239	100.367	107.333	95.4682	117.45	96.1622	117.002
	101.235	106.996	113.478	99.4525	100.466	104.207	105.106	103.264	101.504	112.925	96.9926	103.483	95.7328	107.459	108.379	101.733	116.922	101.674	110.668	91.0604	92.385	88.004	92.4043	101.569	91.4498	90.9596	110.796	96.2543	94.6342	95.6088	87.0247	87.8573	86.4648	92.0604	93.1244	92.8936	95.7472	91.5619	99.7958	93.8335	100.735	105.377	106.239	103.455	106.593	96.5408	119.271	95.0937	116.059
	100.479	105.715	113.478	99.4525	99.8004	105.083	106.088	103.264	99.7834	113.843	96.9926	102.769	95.7328	107.459	108.379	101.733	118.481	102.468	109.366	90.2014	93.5926	88.004	90.6443	102.476	91.4498	89.6602	112.757	95.2411	94.6342	96.2966	86.0989	87.8573	87.5065	92.0604	92.3734	93.4566	96.436	91.5619	97.2799	93.8335	100.735	106.227	107.232	105.771	106.593	95.4682	119.271	94.0253	116.059
	101.99	104.433	114.283	99.4525	99.1351	103.332	108.053	103.264	98.063	113.843	96.9926	101.342	96.636	106.482	108.379	102.959	120.04	102.468	109.366	91.9195	93.5926	88.004	89.7642	103.383	91.4498	89.6602	114.718	95.2411	94.6342	95.6088	86.0989	86.1839	88.5483	92.0604	92.3734	92.3306	96.436	90.9216	96.4413	93.8335	101.516	106.227	108.225	107.315	106.593	96.5408	119.271	94.0253	117.002
	102.746	103.793	114.283	99.4525	99.1351	101.58	109.035	104.053	97.2028	113.843	96.9926	99.9142	95.7328	105.506	108.379	105.41	120.819	100.879	108.064	91.9195	93.5926	89.8966	89.7642	104.29	90.2465	90.9596	113.738	95.2411	96.0057	96.2966	86.0989	85.3471	88.5483	92.9542	92.3734	92.3306	96.436	90.9216	95.6027	93.0383	102.297	107.077	109.218	108.86	107.333	96.5408	120.181	95.0937	117.946
	103.501	102.511	113.478	99.4525	99.1351	101.58	108.053	104.053	97.2028	111.089	96.9926	99.2006	94.8297	104.529	107.468	105.41	120.819	100.085	106.762	92.7785	92.9888	90.8428	89.7642	104.29	90.2465	92.259	113.738	97.2675	98.7487	96.9844	86.0989	84.5104	88.5483	92.0604	92.3734	92.3306	95.7472	90.9216	94.764	93.8335	102.297	107.077	111.203	110.404	108.074	98.6862	119.271	95.0937	118.889
	102.746	102.511	111.868	99.4525	98.4698	101.58	109.035	104.053	98.063	109.253	97.8216	98.4869	94.8297	103.552	108.379	107.861	120.04	100.085	108.064	93.6376	92.385	91.7891	89.7642	104.29	92.6531	93.5585	111.777	97.2675	100.12	96.2966	87.0247	82.8369	87.5065	92.0604	94.6264	92.3306	95.7472	91.5619	94.764	93.8335	101.516	107.077	112.196	110.404	108.814	98.6862	118.36	96.1622	119.833
	103.501	101.23	111.063	99.4525	98.4698	100.704	110.999	103.264	98.063	109.253	97.8216	98.4869	94.8297	103.552	107.468	110.313	120.04	100.879	109.366	93.6376	91.1773	91.7891	89.7642	103.383	93.8564	92.259	110.796	97.2675	101.492	95.6088	88.8763	82.0002	86.4648	92.9542	96.8795	92.8936	95.7472	92.8424	93.9254	94.6287	101.516	107.927	112.196	110.404	108.814	97.6135	118.36	96.1622	120.776
	102.746	101.23	111.063	100.223	98.4698	100.704	111.982	101.688	98.9232	109.253	96.9926	98.4869	94.8297	105.506	107.468	112.764	120.04	101.674	110.668	94.4967	90.5735	90.8428	90.6443	102.476	93.8564	93.5585	110.796	97.2675	100.12	94.9209	90.7279	82.0002	86.4648	93.848	99.8835	93.4566	95.7472	93.4827	93.0868	96.2191	101.516	107.927	111.203	109.632	108.814	97.6135	117.45	97.2307	120.776
	103.501	100.589	110.259	99.4525	97.8044	101.58	112.964	100.9	98.063	109.253	96.9926	99.2006	95.7328	107.459	107.468	111.539	120.819	102.468	110.668	94.4967	89.9697	90.8428	89.7642	102.476	93.8564	90.9596	110.796	97.2675	100.12	94.9209	92.5795	82.0002	85.423	92.9542	101.385	94.0196	95.7472	94.123	92.2482	96.2191	103.078	108.777	110.211	108.087	108.074	98.6862	115.629	96.1622	120.776
	103.501	101.23	109.454	99.4525	97.8044	101.58	112.964	100.9	98.063	110.171	96.9926	98.4869	95.7328	108.436	108.379	110.313	120.04	103.262	111.97	92.7785	89.3659	91.7891	89.7642	102.476	93.8564	92.259	110.796	97.2675	100.12	95.6088	93.5053	83.6736	85.423	92.9542	102.887	94.5826	95.7472	95.4036	91.4096	95.4239	103.078	108.777	110.211	106.543	108.074	98.6862	114.718	96.1622	120.776
	104.257	101.871	109.454	98.6815	97.8044	101.58	112.964	101.688	99.7834	109.253	96.9926	98.4869	95.7328	107.459	108.379	105.41	120.04	104.057	111.97	91.9195	88.1582	91.7891	88.8842	103.383	93.8564	92.259	111.777	97.2675	101.492	94.9209	91.6537	82.8369	85.423	92.9542	104.389	94.5826	95.7472	96.0439	91.4096	96.2191	103.078	108.777	110.211	106.543	108.074	98.6862	112.897	95.0937	119.833
	103.501	102.511	107.844	97.9106	99.1351	101.58	110.999	102.476	99.7834	109.253	96.9926	99.2006	95.7328	107.459	109.289	102.959	119.26	104.057	110.668	91.0604	86.9506	91.7891	88.8842	103.383	95.0597	94.8579	111.777	97.2675	101.492	93.5453	89.8021	82.8369	84.3813	93.848	105.14	95.1456	95.7472	96.0439	91.4096	96.2191	103.859	108.777	109.218	107.315	108.074	101.904	112.897	95.0937	121.72
	103.501	102.511	107.844	97.9106	99.8004	102.456	108.053	104.053	99.7834	109.253	96.9926	99.9142	95.7328	108.436	109.289	101.733	119.26	103.262	109.366	91.0604	86.3468	91.7891	89.7642	102.476	95.0597	94.8579	112.757	98.2807	102.863	92.8574	87.9505	83.6736	85.423	93.848	105.14	95.1456	96.436	96.6842	92.2482	95.4239	105.42	108.777	109.218	109.632	108.074	100.832	114.718	95.0937	123.607
	102.746	102.511	107.039	97.9106	100.466	102.456	107.07	104.841	99.7834	110.171	97.8216	100.628	96.636	110.39	108.379	102.959	120.04	102.468	109.366	91.0604	85.7429	90.8428	90.6443	102.476	93.8564	96.1573	113.738	99.294	104.235	92.1696	87.0247	84.5104	86.4648	95.6356	105.14	95.1456	96.436	97.3245	93.0868	96.2191	106.982	107.927	109.218	110.404	108.814	100.832	115.629	95.0937	124.551
	101.99	102.511	107.844	97.9106	101.796	104.207	107.07	106.418	99.7834	110.171	98.6506	100.628	95.7328	112.344	107.468	105.41	120.04	100.879	109.366	90.2014	86.3468	89.8966	92.4043	102.476	93.8564	94.8579	113.738	99.294	102.863	92.8574	86.0989	86.1839	86.4648	97.4231	105.14	94.5826	97.1248	97.9648	93.9254	96.2191	107.763	107.077	109.218	111.176	108.814	99.7589	115.629	97.2307	123.607
	100.479	103.152	109.454	98.6815	102.462	104.207	108.053	106.418	98.9232	110.171	99.4796	99.9142	95.7328	114.298	106.557	107.861	120.04	99.2908	108.064	90.2014	87.5544	89.8966	93.2844	102.476	92.6531	94.8579	113.738	98.2807	102.863	93.5453	87.0247	88.6941	85.423	98.3169	106.643	94.0196	97.1248	97.9648	94.764	96.2191	107.763	105.377	109.218	110.404	109.554	98.6862	115.629	98.2992	122.664
	100.479	104.433	110.259	98.6815	102.462	105.083	108.053	107.206	98.063	110.171	99.4796	100.628	95.7328	113.321	106.557	109.087	119.26	99.2908	106.762	89.3423	88.1582	89.8966	95.0445	101.569	91.4498	94.8579	112.757	98.2807	102.863	94.9209	87.0247	88.6941	84.3813	99.2107	108.145	94.0196	97.8136	97.9648	94.764	96.2191	107.763	103.678	108.225	109.632	108.814	97.6135	116.539	99.3676	122.664
	99.7237	105.074	111.063	97.9106	101.796	105.083	109.035	107.206	97.2028	110.171	100.309	101.342	94.8297	113.321	107.468	109.087	119.26	98.4965	106.762	88.4832	88.1582	90.8428	95.9245	101.569	91.4498	94.8579	111.777	97.2675	102.863	94.9209	85.1731	89.5308	84.3813	99.2107	109.647	94.0196	97.8136	97.3245	93.0868	97.0143	106.982	101.978	107.232	109.632	108.814	98.6862	118.36	101.505	122.664
	99.7237	106.356	111.868	97.1396	101.131	105.083	110.017	106.418	97.2028	110.171	101.138	101.342	93.9266	112.344	107.468	109.087	118.481	99.2908	108.064	89.3423	88.1582	90.8428	96.8045	100.662	91.4498	96.1573	111.777	98.2807	104.235	95.6088	85.1731	90.3675	84.3813	99.2107	109.647	94.0196	97.8136	96.6842	93.0868	97.0143	106.982	100.279	106.239	108.087	108.074	98.6862	118.36	103.641	123.607
	100.479	107.637	109.454	96.3687	101.131	105.959	109.035	104.841	97.2028	111.089	101.967	102.055	93.0234	109.413	108.379	109.087	117.701	100.879	108.064	90.2014	88.762	89.8966	98.5646	99.7555	91.4498	97.4567	109.816	98.2807	104.235	95.6088	85.1731	90.3675	84.3813	98.3169	108.896	93.4566	97.8136	96.0439	93.0868	97.8095	106.982	98.5789	105.246	108.087	107.333	99.7589	119.271	104.71	123.607
	101.99	106.996	109.454	97.1396	101.131	105.959	109.035	103.264	97.2028	112.007	101.967	102.055	92.1203	108.436	107.468	107.861	117.701	101.674	108.064	90.2014	88.762	88.9503	99.4447	99.7555	92.6531	98.7561	108.835	97.2675	105.606	94.2331	85.1731	90.3675	85.423	95.6356	109.647	93.4566	97.8136	95.4036	92.2482	97.8095	107.763	98.5789	105.246	108.087	106.593	102.977	119.271	104.71	123.607
	103.501	107.637	107.844	97.1396	101.131	107.71	108.053	102.476	98.063	112.007	101.138	101.342	92.1203	107.459	105.646	107.861	116.142	102.468	108.064	90.2014	88.762	88.9503	98.5646	99.7555	92.6531	98.7561	106.874	97.2675	104.235	94.9209	87.0247	91.2043	85.423	93.848	108.896	93.4566	97.8136	95.4036	92.2482	97.8095	107.763	97.7291	104.253	107.315	106.593	106.195	118.36	103.641	123.607
	104.257	107.637	107.844	97.1396	100.466	106.834	108.053	102.476	98.9232	112.007	101.138	100.628	92.1203	107.459	104.736	106.636	115.363	103.262	106.762	90.2014	89.3659	88.9503	96.8045	100.662	92.6531	100.056	102.952	97.2675	102.863	93.5453	89.8021	91.2043	86.4648	92.9542	109.647	92.8936	97.8136	95.4036	93.0868	97.8095	106.982	98.5789	102.267	104.999	106.593	108.34	116.539	103.641	121.72
	104.257	106.996	107.844	97.1396	99.1351	105.959	108.053	101.688	101.504	111.089	101.138	100.628	91.2171	108.436	105.646	106.636	116.142	103.262	106.762	90.2014	89.3659	88.9503	95.9245	101.569	92.6531	101.355	100.991	97.2675	101.492	94.2331	90.7279	91.2043	87.5065	92.0604	109.647	92.8936	98.5025	95.4036	93.9254	97.8095	106.982	99.4287	102.267	102.683	105.853	110.486	115.629	103.641	119.833
	104.257	107.637	108.649	97.1396	98.4698	104.207	108.053	102.476	101.504	111.089	101.138	99.9142	91.2171	108.436	106.557	106.636	116.142	103.262	106.762	91.0604	89.9697	88.9503	95.9245	101.569	93.8564	101.355	99.0303	97.2675	102.863	94.9209	90.7279	91.2043	86.4648	92.9542	109.647	92.8936	97.8136	95.4036	94.764	97.8095	106.982	100.279	101.275	100.367	105.853	111.558	113.808	102.573	118.889
	103.501	108.278	110.259	97.1396	98.4698	103.332	108.053	103.264	101.504	111.089	101.138	99.2006	91.2171	107.459	106.557	106.636	116.922	102.468	108.064	91.9195	90.5735	88.9503	95.9245	102.476	95.0597	101.355	97.0693	97.2675	104.235	94.9209	92.5795	88.6941	85.423	93.848	109.647	93.4566	97.8136	94.7633	95.6027	97.0143	108.544	100.279	101.275	98.0508	106.593	111.558	112.897	99.3676	117.946
	103.501	108.278	110.259	97.1396	98.4698	100.704	107.07	103.264	100.644	111.089	101.138	98.4869	91.2171	107.459	106.557	107.861	116.922	100.879	109.366	92.7785	91.1773	88.9503	96.8045	102.476	95.0597	101.355	96.0888	96.2543	105.606	94.9209	93.5053	88.6941	83.3396	94.7418	108.896	94.0196	97.1248	94.123	94.764	97.0143	107.763	100.279	100.282	96.5067	106.593	111.558	110.166	98.2992	116.059
	104.257	108.278	109.454	97.9106	99.8004	100.704	107.07	103.264	99.7834	110.171	101.138	99.2006	92.1203	106.482	106.557	107.861	116.142	99.2908	111.97	93.6376	91.1773	88.004	97.6846	102.476	93.8564	100.056	95.1083	97.2675	106.978	94.2331	94.4311	87.0206	81.2561	94.7418	108.896	94.5826	96.436	93.4827	94.764	97.0143	107.763	100.279	98.2959	96.5067	107.333	113.704	109.256	97.2307	116.059
	104.257	108.278	110.259	98.6815	100.466	99.8288	107.07	102.476	100.644	110.171	100.309	99.2006	93.0234	104.529	106.557	109.087	114.583	99.2908	114.574	93.6376	91.1773	88.004	97.6846	102.476	92.6531	100.056	95.1083	97.2675	106.978	94.2331	95.3569	87.8573	82.2978	94.7418	107.394	95.1456	95.7472	92.8424	94.764	97.8095	106.982	100.279	95.3172	97.2787	107.333	113.704	108.345	96.1622	115.115
	103.501	108.278	111.063	99.4525	99.8004	98.0774	106.088	102.476	102.364	111.089	100.309	99.2006	93.9266	104.529	107.468	109.087	113.804	98.4965	115.876	93.6376	89.9697	87.0577	96.8045	101.569	92.6531	98.7561	96.0888	97.2675	106.978	94.2331	96.2827	87.8573	84.3813	96.5294	106.643	95.1456	95.0583	92.8424	94.764	97.8095	106.982	100.279	94.3243	98.0508	107.333	112.631	108.345	97.2307	114.172
	102.746	108.278	111.063	99.4525	99.8004	98.0774	106.088	101.688	103.224	112.007	100.309	97.7732	93.0234	105.506	109.289	109.087	113.025	97.7021	114.574	92.7785	89.3659	87.0577	95.9245	101.569	92.6531	100.056	97.0693	97.2675	106.978	94.9209	95.3569	87.8573	86.4648	97.4231	107.394	95.7086	95.0583	92.2021	95.6027	98.6047	105.42	101.128	93.3315	99.5949	107.333	112.631	108.345	97.2307	112.284
	103.501	108.278	111.063	99.4525	99.1351	98.0774	106.088	100.9	103.224	112.925	101.138	97.7732	93.0234	105.506	110.2	109.087	112.245	96.9078	111.97	92.7785	88.762	86.1114	95.9245	100.662	92.6531	100.056	99.0303	97.2675	106.978	95.6088	95.3569	88.6941	87.5065	100.105	108.145	95.7086	95.0583	92.8424	97.2799	98.6047	103.859	101.978	95.3172	100.367	106.593	110.486	109.256	97.2307	111.341
	102.746	108.278	111.063	99.4525	98.4698	98.0774	106.088	100.9	102.364	112.925	101.967	97.7732	93.9266	107.459	111.111	107.861	112.245	96.9078	108.064	93.6376	88.762	86.1114	95.9245	100.662	92.6531	98.7561	100.991	98.2807	105.606	95.6088	94.4311	87.8573	87.5065	100.998	108.145	95.7086	94.3695	92.8424	98.1185	99.3999	101.516	104.528	97.303	101.911	106.593	110.486	109.256	97.2307	110.397
	103.501	107.637	111.868	99.4525	98.4698	98.9531	105.106	101.688	101.504	112.007	101.967	98.4869	94.8297	109.413	111.111	109.087	112.245	96.9078	108.064	94.4967	88.1582	87.0577	95.9245	100.662	92.6531	98.7561	101.972	97.2675	106.978	95.6088	94.4311	87.8573	86.4648	101.892	109.647	95.7086	94.3695	92.2021	98.1185	100.195	99.1733	105.377	99.2888	103.455	106.593	110.486	110.166	97.2307	110.397
	102.746	107.637	111.868	100.223	98.4698	99.8288	103.141	101.688	100.644	112.007	101.967	98.4869	94.8297	109.413	112.022	110.313	111.466	96.9078	106.762	95.3557	86.9506	87.0577	96.8045	99.7555	92.6531	98.7561	101.972	97.2675	105.606	95.6088	95.3569	87.0206	85.423	100.998	110.398	95.7086	95.0583	91.5619	98.9571	102.581	96.0497	106.227	99.2888	104.999	107.333	110.486	110.166	97.2307	110.397
	101.235	106.996	112.673	99.4525	97.8044	99.8288	102.159	102.476	99.7834	111.089	101.967	99.2006	94.8297	109.413	110.2	111.539	111.466	96.9078	105.46	94.4967	84.5353	87.0577	97.6846	99.7555	91.4498	98.7561	100.991	98.2807	104.235	95.6088	94.4311	85.3471	85.423	100.998	109.647	95.1456	95.7472	90.9216	99.7958	102.581	93.7071	106.227	99.2888	104.999	108.074	112.631	109.256	97.2307	109.454
	101.235	107.637	113.478	98.6815	97.1391	99.8288	101.176	103.264	100.644	111.089	101.967	99.2006	95.7328	109.413	109.289	113.99	112.245	96.9078	106.762	92.7785	81.5162	88.004	97.6846	99.7555	90.2465	98.7561	99.0303	99.294	100.12	94.9209	93.5053	85.3471	85.423	100.105	109.647	96.2716	96.436	90.9216	99.7958	104.171	92.9262	105.377	99.2888	105.771	109.554	111.558	109.256	98.2992	109.454
	102.746	106.356	113.478	97.9106	95.8084	99.8288	102.159	104.053	100.644	110.171	102.796	99.2006	96.636	110.39	109.289	115.216	112.245	96.9078	105.46	91.9195	80.9123	90.8428	97.6846	97.9418	90.2465	100.056	99.0303	98.2807	98.7487	94.2331	92.5795	83.6736	85.423	100.105	110.398	96.8346	97.1248	90.9216	98.9571	104.171	91.3644	103.678	99.2888	106.543	110.294	112.631	109.256	98.2992	111.341
	102.746	106.996	113.478	97.1396	94.4778	99.8288	103.141	104.053	100.644	109.253	102.796	98.4869	97.5391	113.321	109.289	113.99	112.245	97.7021	104.158	91.0604	80.9123	91.7891	95.9245	97.9418	91.4498	100.056	99.0303	98.2807	97.3772	94.9209	91.6537	82.8369	83.3396	99.2107	111.149	96.8346	97.8136	90.9216	98.9571	105.761	90.5835	103.678	101.275	107.315	111.775	111.558	109.256	97.2307	112.284
	102.746	106.996	112.673	97.9106	94.4778	99.8288	103.141	104.053	100.644	110.171	103.625	98.4869	97.5391	114.298	110.2	112.764	112.245	98.4965	106.762	91.0604	80.9123	93.6817	95.9245	97.0349	92.6531	100.056	99.0303	97.2675	97.3772	95.6088	90.7279	82.0002	82.2978	99.2107	111.9	96.8346	97.8136	90.9216	98.9571	104.966	89.8026	102.828	102.267	108.087	112.515	109.413	109.256	97.2307	112.284
	101.99	108.278	112.673	97.1396	95.1431	99.8288	103.141	104.053	101.504	110.171	103.625	98.4869	96.636	113.321	111.111	112.764	112.245	99.2908	106.762	91.9195	82.12	93.6817	95.9245	97.0349	92.6531	101.355	98.0498	96.2543	97.3772	94.9209	90.7279	82.8369	81.2561	100.998	110.398	96.2716	98.5025	90.9216	99.7958	104.171	89.8026	102.828	103.26	108.087	113.255	107.268	110.166	95.0937	112.284
	102.746	109.559	111.868	97.1396	95.1431	100.704	102.159	104.053	101.504	109.253	103.625	97.7732	95.7328	111.367	112.022	111.539	112.245	100.085	106.762	92.7785	85.7429	92.7354	97.6846	97.0349	93.8564	101.355	99.0303	96.2543	98.7487	94.9209	90.7279	83.6736	80.2143	101.892	110.398	96.2716	99.1913	92.2021	98.9571	103.376	89.8026	101.978	104.253	108.087	113.996	106.195	111.987	92.9568	112.284
	104.257	109.559	113.478	97.9106	95.8084	102.456	102.159	102.476	101.504	109.253	101.967	98.4869	95.7328	108.436	113.843	110.313	112.245	100.085	105.46	94.4967	87.5544	92.7354	98.5646	96.128	97.4662	102.654	99.0303	96.2543	98.7487	94.9209	90.7279	85.3471	79.1726	100.998	111.149	95.7086	99.8801	92.8424	98.9571	104.171	89.8026	101.978	103.26	108.087	113.996	104.05	111.987	91.8883	112.284
	104.257	109.559	112.673	98.6815	97.1391	102.456	103.141	101.688	100.644	111.089	101.967	98.4869	95.7328	107.459	114.754	109.087	112.245	100.085	102.856	96.2148	88.762	91.7891	98.5646	96.128	99.8728	102.654	99.0303	96.2543	98.7487	94.9209	89.8021	87.0206	79.1726	99.2107	111.9	95.1456	100.569	93.4827	98.1185	104.966	89.8026	101.978	103.26	108.86	113.996	104.05	112.897	92.9568	112.284
	104.257	109.559	112.673	100.223	97.1391	100.704	103.141	100.111	100.644	111.089	101.967	98.4869	95.7328	108.436	115.665	106.636	112.245	98.4965	98.9504	97.0738	89.3659	91.7891	97.6846	97.0349	99.8728	103.954	100.011	97.2675	97.3772	94.2331	88.8763	87.8573	79.1726	97.4231	111.9	95.1456	100.569	94.123	98.1185	104.966	88.2408	102.828	103.26	108.86	113.996	104.05	111.987	95.0937	111.341
	103.501	108.918	111.868	100.223	97.8044	99.8288	105.106	100.111	101.504	111.089	101.967	98.4869	96.636	108.436	115.665	106.636	113.025	96.9078	97.6484	97.9329	89.3659	91.7891	96.8045	96.128	99.8728	103.954	99.0303	97.2675	96.0057	94.2331	87.9505	87.0206	80.2143	96.5294	111.9	95.1456	99.8801	95.4036	97.2799	105.761	87.4599	102.828	103.26	109.632	113.255	102.977	111.077	97.2307	110.397
	101.99	109.559	111.868	100.994	97.8044	100.704	105.106	100.111	102.364	111.089	101.967	97.7732	96.636	109.413	116.575	106.636	113.025	95.3191	98.9504	100.51	88.762	92.7354	95.0445	96.128	99.8728	103.954	100.011	97.2675	96.0057	95.6088	87.9505	87.0206	81.2561	95.6356	112.651	95.7086	99.1913	96.0439	97.2799	107.352	87.4599	102.828	104.253	111.176	113.255	102.977	107.435	97.2307	109.454
	101.235	110.2	112.673	100.994	97.8044	101.58	104.123	100.111	101.504	110.171	101.138	97.7732	96.636	108.436	115.665	106.636	112.245	94.5248	101.554	101.369	88.762	91.7891	94.1644	97.9418	99.8728	103.954	100.011	97.2675	97.3772	94.9209	87.9505	87.0206	81.2561	93.848	113.402	95.7086	98.5025	96.6842	97.2799	108.942	88.2408	102.828	102.267	111.948	112.515	101.904	105.614	97.2307	108.51
	101.235	110.2	114.283	100.994	97.8044	102.456	106.088	100.111	102.364	110.171	101.138	97.7732	97.5391	106.482	114.754	107.861	111.466	94.5248	102.856	102.228	89.3659	91.7891	94.1644	97.9418	99.8728	103.954	102.952	97.2675	97.3772	94.2331	88.8763	85.3471	82.2978	92.0604	114.153	95.7086	97.8136	97.9648	97.2799	109.737	89.0217	101.978	101.275	112.72	112.515	101.904	101.972	96.1622	107.567
	100.479	109.559	113.478	99.4525	98.4698	102.456	107.07	100.111	102.364	110.171	101.138	97.0596	97.5391	106.482	113.843	106.636	111.466	96.1135	102.856	101.369	89.3659	91.7891	93.2844	97.9418	98.6695	102.654	104.913	98.2807	97.3772	94.2331	88.8763	84.5104	81.2561	88.4852	113.402	96.2716	97.8136	98.6051	97.2799	110.533	90.5835	101.978	101.275	112.72	112.515	101.904	98.33	97.2307	106.623
	100.479	109.559	113.478	98.6815	98.4698	103.332	109.035	100.9	102.364	111.089	101.138	97.7732	97.5391	105.506	112.932	104.184	109.907	96.9078	102.856	100.51	89.9697	91.7891	90.6443	97.9418	99.8728	102.654	107.855	100.307	96.0057	93.5453	89.8021	85.3471	80.2143	85.8039	113.402	95.7086	97.1248	98.6051	96.4413	112.123	91.3644	101.978	102.267	113.492	111.775	102.977	98.33	97.2307	105.679
	99.7237	109.559	113.478	98.6815	98.4698	102.456	110.017	101.688	101.504	110.171	101.967	97.7732	97.5391	104.529	112.022	100.507	108.348	97.7021	102.856	98.792	89.9697	92.7354	88.8842	97.9418	102.279	102.654	109.816	101.32	97.3772	93.5453	88.8763	87.0206	79.1726	82.2287	112.651	96.2716	96.436	98.6051	95.6027	113.713	92.1453	102.828	104.253	112.72	111.035	104.05	98.33	99.3676	106.623
	99.7237	108.918	111.868	98.6815	99.1351	102.456	110.999	102.476	100.644	110.171	101.967	97.7732	97.5391	103.552	112.022	98.0559	108.348	98.4965	102.856	97.0738	89.3659	92.7354	88.0041	97.9418	102.279	101.355	109.816	101.32	97.3772	92.8574	89.8021	86.1839	78.1308	81.3349	112.651	96.8346	95.7472	98.6051	94.764	116.099	93.7071	102.828	105.246	111.176	110.294	104.05	98.33	99.3676	107.567
	98.9682	108.918	110.259	97.9106	98.4698	102.456	110.999	103.264	101.504	111.089	101.967	97.0596	97.5391	101.598	111.111	96.8302	107.568	100.085	105.46	95.3557	88.762	93.6817	87.1241	98.8486	103.483	100.056	108.835	102.334	97.3772	93.5453	88.8763	87.0206	77.0891	84.0163	111.149	96.8346	95.0583	97.9648	93.9254	116.894	93.7071	102.828	105.246	108.86	109.554	105.122	98.33	99.3676	106.623
	98.2127	108.278	110.259	97.1396	98.4698	104.207	110.017	103.264	102.364	112.007	101.967	96.3459	97.5391	101.598	112.022	95.6045	106.789	100.085	106.762	92.7785	88.1582	94.628	87.1241	98.8486	103.483	100.056	106.874	103.347	97.3772	93.5453	87.9505	88.6941	76.0473	87.5915	111.149	96.8346	95.7472	97.9648	93.9254	117.689	94.488	102.828	104.253	108.087	108.814	105.122	99.2405	99.3676	105.679
	97.4572	108.918	109.454	96.3687	98.4698	105.083	108.053	103.264	100.644	111.089	101.138	97.0596	98.4423	102.575	112.022	94.3788	106.009	100.085	106.762	91.0604	88.1582	95.5742	87.1241	98.8486	103.483	100.056	105.894	103.347	97.3772	93.5453	87.0247	87.8573	76.0473	89.379	111.9	96.2716	97.1248	98.6051	93.9254	118.485	96.0497	101.978	103.26	106.543	108.074	104.05	99.2405	98.2992	105.679
	97.4572	108.918	111.063	96.3687	97.8044	103.332	108.053	101.688	99.7834	111.089	100.309	96.3459	98.4423	102.575	112.932	94.3788	105.23	100.085	106.762	91.0604	88.1582	95.5742	87.1241	97.9418	102.279	100.056	104.913	103.347	97.3772	93.5453	87.0247	88.6941	75.0056	91.1666	111.9	95.7086	98.5025	98.6051	94.764	120.075	96.0497	101.128	103.26	105.771	108.074	104.05	98.33	96.1622	104.736
	96.7018	109.559	111.063	97.1396	97.1391	104.207	108.053	100.9	99.7834	112.007	99.4796	97.0596	98.4423	101.598	112.022	95.6045	105.23	100.879	106.762	91.0604	88.762	95.5742	88.0041	97.9418	101.076	100.056	102.952	102.334	98.7487	94.9209	86.0989	88.6941	76.0473	90.2728	111.9	95.1456	98.5025	99.2454	95.6027	120.87	95.2688	101.978	103.26	104.999	108.074	104.05	95.5986	95.0937	103.792
	96.7018	110.2	111.868	97.9106	96.4738	103.332	108.053	100.111	99.7834	112.007	99.4796	96.3459	98.4423	99.6441	111.111	96.8302	105.23	101.674	106.762	91.9195	89.3659	96.5205	89.7642	97.9418	98.6695	100.056	102.952	101.32	101.492	94.2331	86.0989	87.8573	77.0891	90.2728	112.651	94.5826	97.8136	99.8857	96.4413	120.87	95.2688	101.978	103.26	103.455	108.074	104.05	92.8672	92.9568	103.792
	97.4572	110.2	111.063	98.6815	97.1391	103.332	110.017	99.323	99.7834	112.007	99.4796	97.0596	98.4423	98.6672	112.022	96.8302	105.23	102.468	105.46	92.7785	90.5735	97.4668	93.2844	97.9418	97.4662	98.7561	104.913	101.32	101.492	94.9209	86.0989	87.8573	77.0891	89.379	111.9	94.5826	96.436	99.8857	97.2799	120.075	95.2688	101.978	105.246	102.683	107.333	102.977	91.9568	91.8883	104.736
	97.4572	110.2	110.259	97.9106	97.1391	102.456	110.999	97.7465	99.7834	112.007	99.4796	97.0596	98.4423	100.621	112.932	96.8302	106.009	103.262	102.856	93.6376	89.9697	97.4668	95.9245	97.9418	98.6695	98.7561	107.855	100.307	104.235	94.2331	86.0989	87.0206	79.1726	89.379	111.149	94.5826	95.7472	99.8857	97.2799	120.075	95.2688	101.128	106.239	102.683	108.074	101.904	91.0463	91.8883	105.679
	97.4572	110.84	110.259	97.9106	97.8044	101.58	110.999	97.7465	99.7834	112.007	100.309	97.7732	98.4423	100.621	115.665	96.8302	106.009	103.262	102.856	93.6376	88.762	96.5205	97.6846	98.8486	98.6695	97.4567	108.835	100.307	105.606	94.9209	86.0989	87.0206	80.2143	91.1666	111.149	94.5826	95.0583	99.2454	97.2799	120.075	95.2688	101.128	106.239	101.139	108.074	100.832	91.0463	92.9568	106.623
	96.7018	110.2	107.844	98.6815	97.1391	100.704	110.999	97.7465	99.7834	112.925	100.309	97.7732	98.4423	101.598	117.486	96.8302	106.009	104.851	101.554	92.7785	88.1582	96.5205	98.5646	98.8486	101.076	96.1573	108.835	100.307	104.235	95.6088	85.1731	87.0206	83.3396	91.1666	111.149	94.5826	94.3695	99.2454	96.4413	120.87	96.0497	100.279	106.239	100.367	109.554	100.832	91.9568	92.9568	107.567
	97.4572	110.2	106.235	98.6815	96.4738	100.704	110.017	98.5347	99.7834	112.925	101.138	97.7732	99.3454	103.552	117.486	98.0559	106.789	106.44	101.554	93.6376	88.1582	96.5205	98.5646	99.7555	104.686	96.1573	107.855	100.307	104.235	95.6088	85.1731	87.0206	85.423	91.1666	111.149	94.5826	93.6807	98.6051	98.1185	123.256	96.8306	100.279	106.239	100.367	111.035	102.977	91.9568	94.0253	107.567
	96.7018	110.84	106.235	98.6815	96.4738	100.704	110.017	99.323	99.7834	112.007	101.138	97.7732	100.249	103.552	117.486	99.2816	107.568	108.028	101.554	95.3557	87.5544	97.4668	98.5646	99.7555	105.889	96.1573	107.855	100.307	102.863	96.2966	85.1731	87.0206	86.4648	91.1666	110.398	94.5826	92.9918	97.9648	98.1185	123.256	99.1733	100.279	105.246	100.367	111.035	104.05	92.8672	96.1622	105.679
	96.7018	110.84	107.039	97.9106	96.4738	102.456	109.035	100.111	99.7834	112.007	101.138	97.7732	100.249	103.552	118.397	99.2816	108.348	108.823	102.856	97.9329	88.1582	99.3594	97.6846	99.7555	104.686	96.1573	108.835	102.334	101.492	96.9844	87.0247	87.0206	88.5483	92.0604	112.651	95.1456	92.303	97.3245	98.1185	124.051	101.516	101.128	104.253	101.139	111.035	105.122	91.9568	97.2307	105.679
	95.1908	111.481	106.235	97.9106	96.4738	103.332	108.053	99.323	100.644	112.007	101.138	97.7732	99.3454	102.575	118.397	99.2816	107.568	110.411	104.158	98.792	88.1582	99.3594	97.6846	100.662	103.483	93.5585	109.816	102.334	101.492	97.6723	86.0989	87.0206	88.5483	92.9542	112.651	96.2716	92.9918	96.0439	97.2799	124.051	103.078	101.128	103.26	101.911	111.035	105.122	90.1359	96.1622	104.736
	94.4353	110.84	106.235	97.9106	96.4738	104.207	108.053	99.323	101.504	112.007	100.309	97.0596	99.3454	103.552	118.397	100.507	106.009	110.411	101.554	99.651	88.1582	99.3594	97.6846	99.7555	101.076	93.5585	110.796	103.347	100.12	98.3601	87.9505	87.0206	87.5065	93.848	112.651	97.3975	93.6807	95.4036	97.2799	123.256	103.078	101.128	101.275	101.911	111.035	104.05	88.3149	96.1622	104.736
	94.4353	110.84	106.235	97.1396	96.4738	105.083	108.053	99.323	103.224	112.007	100.309	97.0596	98.4423	103.552	120.218	100.507	104.45	109.617	100.252	101.369	88.1582	98.4131	97.6846	98.8486	98.6695	92.259	111.777	104.36	98.7487	99.0479	87.0247	87.8573	85.423	95.6356	112.651	97.9605	93.6807	94.123	96.4413	122.461	103.078	101.978	100.282	101.139	110.294	102.977	88.3149	96.1622	105.679
	94.4353	110.2	106.235	97.1396	95.8084	105.083	108.053	100.111	105.805	111.089	100.309	96.3459	97.5391	104.529	121.129	100.507	103.671	108.028	98.9504	101.369	88.762	97.4668	97.6846	97.9418	95.0597	92.259	111.777	104.36	97.3772	96.9844	86.0989	87.8573	83.3396	96.5294	111.9	98.5235	93.6807	94.123	95.6027	121.665	102.297	101.978	99.2888	98.8228	109.554	105.122	88.3149	97.2307	106.623
	95.1908	109.559	106.235	97.1396	95.8084	105.959	109.035	100.9	105.805	111.089	99.4796	96.3459	98.4423	106.482	122.04	100.507	102.891	107.234	97.6484	102.228	88.762	95.5742	97.6846	97.0349	92.6531	92.259	112.757	104.36	97.3772	97.6723	85.1731	87.8573	81.2561	98.3169	110.398	97.9605	93.6807	93.4827	95.6027	120.87	102.297	101.128	99.2888	97.2787	108.814	104.05	90.1359	97.2307	107.567
	97.4572	108.918	106.235	98.6815	96.4738	105.959	109.035	101.688	104.084	111.089	97.8216	96.3459	99.3454	108.436	122.951	100.507	102.891	107.234	97.6484	102.228	88.762	93.6817	97.6846	97.0349	91.4498	92.259	113.738	103.347	94.6342	97.6723	84.2473	87.0206	80.2143	99.2107	108.896	97.3975	95.0583	92.8424	94.764	119.28	103.078	101.128	99.2888	96.5067	109.554	102.977	91.9568	97.2307	108.51
	98.2127	109.559	106.235	99.4525	96.4738	105.959	109.035	102.476	103.224	110.171	97.8216	96.3459	100.249	109.413	124.772	101.733	102.112	106.44	97.6484	103.087	89.3659	92.7354	96.8045	97.9418	90.2465	92.259	114.718	103.347	93.2627	97.6723	85.1731	86.1839	80.2143	100.105	108.896	96.2716	95.7472	92.2021	94.764	117.689	103.078	101.128	99.2888	95.7346	109.554	101.904	91.9568	97.2307	109.454
	96.7018	109.559	105.43	100.223	97.1391	105.959	108.053	104.053	102.364	109.253	97.8216	97.0596	101.152	109.413	124.772	104.184	101.332	104.851	98.9504	103.946	89.9697	92.7354	96.8045	97.9418	90.2465	93.5585	115.699	102.334	91.8912	96.9844	86.0989	86.1839	81.2561	100.998	107.394	96.2716	95.7472	92.2021	95.6027	116.894	101.516	100.279	99.2888	94.9626	110.294	101.904	91.9568	97.2307	110.397
	97.4572	109.559	106.235	100.994	97.1391	105.959	107.07	104.841	102.364	109.253	97.8216	97.7732	101.152	106.482	124.772	106.636	101.332	104.057	98.9504	103.946	91.1773	92.7354	96.8045	98.8486	89.0432	92.259	117.66	101.32	91.8912	96.2966	87.0247	86.1839	83.3396	101.892	105.892	95.7086	96.436	92.2021	95.6027	118.485	100.735	101.128	99.2888	94.1905	110.294	100.832	90.1359	97.2307	112.284
	98.2127	109.559	107.039	100.994	97.1391	105.959	106.088	104.841	101.504	109.253	98.6506	97.0596	100.249	104.529	124.772	107.861	101.332	101.674	97.6484	103.946	91.1773	93.6817	96.8045	99.7555	89.0432	92.259	117.66	100.307	91.8912	96.2966	86.0989	86.1839	84.3813	100.998	105.14	95.1456	96.436	92.8424	95.6027	118.485	101.516	101.128	99.2888	94.1905	110.294	99.7589	90.1359	98.2992	112.284
	97.4572	108.918	107.844	100.994	96.4738	104.207	105.106	104.841	101.504	110.171	98.6506	96.3459	100.249	102.575	122.951	106.636	101.332	100.085	98.9504	102.228	89.9697	94.628	96.8045	99.7555	87.8399	92.259	118.64	99.294	93.2627	96.9844	87.0247	87.0206	85.423	100.998	105.14	94.5826	95.0583	93.4827	96.4413	119.28	101.516	101.128	99.2888	94.9626	110.294	99.7589	87.4045	99.3676	111.341
	97.4572	108.918	107.039	100.994	95.8084	104.207	105.106	104.053	101.504	110.171	97.8216	96.3459	100.249	102.575	123.861	106.636	101.332	97.7021	100.252	99.651	88.762	95.5742	95.9245	100.662	89.0432	94.8579	118.64	98.2807	93.2627	96.9844	88.8763	87.8573	86.4648	101.892	103.638	95.1456	95.0583	94.123	97.2799	119.28	101.516	101.128	99.2888	97.2787	110.294	99.7589	86.494	101.505	111.341
	98.2127	108.278	106.235	100.994	95.8084	103.332	105.106	104.841	100.644	109.253	97.8216	94.9185	101.152	102.575	123.861	106.636	100.553	96.9078	100.252	98.792	88.1582	96.5205	95.9245	100.662	90.2465	94.8579	117.66	99.294	93.2627	96.2966	88.8763	87.8573	87.5065	101.892	103.638	95.1456	95.0583	95.4036	98.9571	119.28	101.516	101.978	99.2888	99.5949	111.035	99.7589	84.6731	102.573	110.397
	98.9682	107.637	107.039	100.994	95.1431	102.456	106.088	104.053	101.504	109.253	98.6506	94.9185	102.055	104.529	122.951	106.636	98.9939	96.1135	100.252	97.9329	88.1582	96.5205	95.9245	100.662	90.2465	96.1573	117.66	99.294	96.0057	96.2966	88.8763	87.0206	88.5483	100.105	102.887	95.1456	96.436	95.4036	98.9571	117.689	99.9542	101.978	99.2888	102.683	110.294	101.904	82.8521	102.573	109.454
	99.7237	106.356	107.039	101.765	95.8084	102.456	107.07	104.053	103.224	109.253	98.6506	94.2049	102.958	105.506	122.04	106.636	98.2144	96.1135	101.554	99.651	88.762	96.5205	95.9245	100.662	91.4498	94.8579	116.679	101.32	97.3772	95.6088	87.9505	87.0206	89.59	99.2107	102.887	95.1456	97.1248	96.0439	98.1185	116.894	99.1733	101.978	99.2888	103.455	110.294	100.832	83.7626	102.573	108.51
	101.99	106.356	107.844	102.536	95.1431	102.456	108.053	102.476	102.364	109.253	98.6506	94.2049	103.861	103.552	121.129	107.861	98.2144	96.1135	102.856	101.369	89.9697	96.5205	95.9245	100.662	92.6531	94.8579	113.738	102.334	97.3772	94.9209	88.8763	87.0206	89.59	98.3169	102.136	95.7086	97.8136	96.6842	98.1185	115.304	97.6115	101.978	101.275	104.227	110.294	100.832	84.6731	102.573	108.51
	101.235	106.996	107.039	103.307	94.4778	103.332	107.07	102.476	102.364	110.171	98.6506	94.9185	103.861	103.552	118.397	107.861	98.2144	96.1135	102.856	103.087	90.5735	94.628	95.0445	99.7555	92.6531	94.8579	109.816	102.334	97.3772	94.2331	88.8763	87.8573	88.5483	98.3169	102.136	96.2716	98.5025	97.3245	97.2799	116.099	96.8306	102.828	103.26	103.455	109.554	100.832	85.5835	103.641	108.51
	102.746	107.637	106.235	104.078	93.8124	104.207	106.088	102.476	102.364	110.171	99.4796	94.2049	103.861	103.552	115.665	106.636	98.2144	96.1135	104.158	104.805	90.5735	93.6817	94.1644	99.7555	93.8564	94.8579	108.835	103.347	97.3772	93.5453	88.8763	88.6941	87.5065	99.2107	102.136	97.3975	98.5025	97.3245	96.4413	116.894	96.0497	101.978	105.246	102.683	108.814	98.6862	87.4045	104.71	108.51
	104.257	108.918	103.82	104.849	93.1471	103.332	106.088	103.264	103.224	111.089	99.4796	94.9185	102.958	105.506	113.843	106.636	99.7734	96.9078	104.158	105.664	90.5735	93.6817	93.2844	99.7555	93.8564	94.8579	106.874	102.334	97.3772	93.5453	87.0247	88.6941	86.4648	98.3169	102.887	97.9605	99.1913	97.9648	95.6027	117.689	95.2688	101.128	107.232	101.139	108.074	96.5408	86.494	103.641	109.454
	103.501	110.2	103.015	104.849	92.4817	103.332	105.106	104.053	104.084	110.171	99.4796	94.9185	102.958	105.506	112.932	105.41	100.553	97.7021	102.856	105.664	89.3659	94.628	93.2844	100.662	93.8564	94.8579	106.874	101.32	96.0057	93.5453	86.0989	89.5308	86.4648	98.3169	103.638	97.9605	97.1248	97.9648	95.6027	118.485	96.0497	101.128	108.225	100.367	108.074	94.3955	86.494	102.573	111.341
	103.501	108.918	103.015	104.849	92.4817	104.207	104.123	105.629	104.945	109.253	100.309	93.4912	102.958	105.506	112.022	106.636	101.332	98.4965	104.158	103.946	89.3659	94.628	93.2844	101.569	93.8564	96.1573	106.874	101.32	94.6342	94.9209	85.1731	89.5308	85.423	99.2107	103.638	97.3975	97.8136	98.6051	95.6027	118.485	96.0497	100.279	108.225	98.8228	107.333	93.3228	88.3149	100.436	113.228
	101.99	108.918	104.625	104.078	93.1471	105.083	103.141	106.418	106.665	107.417	101.138	92.7775	101.152	105.506	112.022	106.636	102.112	99.2908	104.158	102.228	89.9697	95.5742	93.2844	101.569	93.8564	94.8579	108.835	99.294	94.6342	94.2331	84.2473	88.6941	84.3813	100.105	104.389	96.8346	97.8136	97.9648	95.6027	119.28	96.8306	100.279	108.225	99.5949	107.333	93.3228	90.1359	98.2992	114.172
	101.235	109.559	107.039	103.307	93.1471	105.959	102.159	107.206	106.665	106.498	101.967	92.0638	100.249	105.506	112.932	106.636	102.891	100.085	106.762	99.651	89.9697	95.5742	94.1644	101.569	93.8564	94.8579	107.855	100.307	94.6342	94.2331	84.2473	88.6941	84.3813	100.998	104.389	95.7086	97.8136	98.6051	96.4413	120.075	96.8306	101.128	106.239	98.8228	106.593	94.3955	92.8672	98.2992	115.115
	100.479	109.559	107.039	101.765	92.4817	105.959	101.176	107.206	106.665	106.498	101.967	92.0638	98.4423	104.529	112.932	105.41	103.671	101.674	106.762	97.0738	88.762	96.5205	94.1644	100.662	93.8564	94.8579	105.894	100.307	94.6342	94.2331	83.3215	88.6941	85.423	101.892	105.14	95.7086	97.8136	97.9648	96.4413	119.28	96.8306	101.128	105.246	98.8228	105.853	94.3955	93.7777	98.2992	114.172
	99.7237	108.278	107.844	100.994	93.1471	105.959	100.194	106.418	106.665	105.58	101.138	92.0638	97.5391	104.529	112.022	104.184	104.45	102.468	105.46	94.4967	88.762	97.4668	93.2844	98.8486	93.8564	96.1573	103.933	100.307	93.2627	93.5453	83.3215	88.6941	86.4648	102.786	105.14	95.7086	98.5025	97.9648	96.4413	117.689	97.6115	102.828	105.246	98.0508	105.113	95.4682	93.7777	98.2992	113.228
	98.2127	107.637	106.235	100.223	93.1471	105.959	99.2119	104.841	105.805	104.662	101.138	91.3502	96.636	103.552	112.022	104.184	105.23	103.262	104.158	93.6376	89.3659	97.4668	93.2844	97.9418	95.0597	97.4567	104.913	99.294	91.8912	94.9209	82.3957	88.6941	88.5483	102.786	106.643	96.2716	98.5025	98.6051	97.2799	117.689	97.6115	104.528	104.253	97.2787	105.113	95.4682	91.9568	98.2992	113.228
	97.4572	108.278	106.235	99.4525	93.8124	105.959	99.2119	102.476	106.665	103.744	100.309	91.3502	97.5391	103.552	111.111	105.41	105.23	104.057	102.856	91.9195	88.762	99.3594	93.2844	96.128	93.8564	96.1573	102.952	99.294	91.8912	95.6088	83.3215	89.5308	89.59	102.786	107.394	96.2716	99.1913	97.9648	98.1185	116.099	97.6115	105.377	104.253	96.5067	104.373	95.4682	91.9568	98.2992	112.284
	96.7018	108.278	106.235	98.6815	94.4778	105.959	99.2119	99.323	106.665	103.744	100.309	90.6365	98.4423	104.529	110.2	106.636	105.23	104.851	100.252	91.9195	89.3659	100.306	93.2844	95.2212	93.8564	96.1573	102.952	99.294	91.8912	96.2966	83.3215	89.5308	88.5483	101.892	107.394	96.2716	99.8801	97.9648	98.1185	116.099	96.8306	105.377	104.253	95.7346	104.373	96.5408	91.9568	97.2307	111.341
	97.4572	108.918	106.235	97.1396	95.1431	105.959	100.194	96.9582	107.525	103.744	100.309	90.6365	100.249	104.529	109.289	107.861	106.009	104.057	100.252	91.9195	88.762	100.306	93.2844	94.3143	93.8564	96.1573	102.952	99.294	91.8912	94.9209	84.2473	89.5308	87.5065	100.998	108.896	95.1456	100.569	97.9648	98.9571	115.304	96.0497	106.227	105.246	94.9626	103.632	97.6135	92.8672	96.1622	111.341
	98.2127	109.559	106.235	96.3687	95.1431	105.959	100.194	94.5933	107.525	104.662	100.309	89.9228	102.055	106.482	108.379	107.861	106.789	103.262	101.554	91.9195	88.762	100.306	94.1644	93.4074	92.6531	97.4567	104.913	99.294	91.8912	96.2966	84.2473	89.5308	87.5065	99.2107	109.647	94.0196	101.258	97.3245	99.7958	115.304	94.488	106.227	106.239	94.1905	103.632	98.6862	94.6882	96.1622	111.341
	99.7237	109.559	107.039	96.3687	95.1431	105.083	100.194	93.8051	105.805	104.662	101.138	90.6365	104.764	106.482	107.468	107.861	106.789	102.468	102.856	91.9195	88.762	99.3594	93.2844	93.4074	91.4498	97.4567	106.874	98.2807	93.2627	96.9844	85.1731	89.5308	87.5065	98.3169	109.647	93.4566	100.569	97.9648	98.9571	114.509	93.7071	105.377	107.232	92.6464	104.373	100.832	97.4196	96.1622	112.284
	99.7237	109.559	106.235	97.1396	95.8084	106.834	100.194	94.5933	104.945	104.662	100.309	90.6365	106.571	106.482	108.379	107.861	106.789	101.674	105.46	91.9195	88.762	99.3594	92.4043	94.3143	90.2465	98.7561	108.835	98.2807	94.6342	95.6088	87.0247	89.5308	87.5065	97.4231	108.145	92.8936	99.8801	97.9648	99.7958	113.713	92.9262	104.528	105.246	91.8744	105.113	100.832	98.33	97.2307	113.228
	101.235	110.2	105.43	97.1396	95.8084	105.959	100.194	96.1699	104.084	104.662	99.4796	90.6365	107.474	106.482	108.379	106.636	106.789	101.674	106.762	90.2014	88.1582	99.3594	92.4043	94.3143	91.4498	98.7561	109.816	98.2807	94.6342	94.9209	87.9505	89.5308	88.5483	96.5294	108.896	92.8936	99.1913	99.2454	99.7958	112.123	91.3644	104.528	104.253	91.8744	105.113	101.904	98.33	98.2992	114.172
	101.235	109.559	105.43	97.9106	97.1391	105.959	100.194	96.9582	104.084	103.744	99.4796	91.3502	108.377	106.482	109.289	107.861	106.789	101.674	106.762	89.3423	88.1582	100.306	92.4043	94.3143	91.4498	100.056	110.796	99.294	96.0057	95.6088	88.8763	89.5308	88.5483	96.5294	108.145	93.4566	98.5025	99.8857	98.1185	112.918	91.3644	103.678	103.26	91.1023	104.373	101.904	98.33	98.2992	114.172
	101.235	108.918	105.43	97.9106	97.1391	105.083	100.194	97.7465	104.084	103.744	99.4796	92.7775	108.377	107.459	110.2	109.087	106.789	103.262	105.46	88.4832	88.762	100.306	92.4043	95.2212	89.0432	100.056	110.796	101.32	96.0057	96.2966	89.8021	87.8573	89.59	94.7418	105.892	94.0196	99.1913	100.526	97.2799	112.918	91.3644	103.678	102.267	89.5582	104.373	100.832	99.2405	97.2307	112.284
	101.235	108.918	106.235	98.6815	97.1391	104.207	101.176	97.7465	104.084	105.58	98.6506	92.7775	107.474	108.436	110.2	109.087	106.789	104.851	105.46	87.6242	88.762	101.252	91.5243	95.2212	90.2465	100.056	108.835	100.307	96.0057	94.9209	91.6537	87.0206	90.6318	93.848	103.638	94.0196	99.8801	100.526	96.4413	112.918	90.5835	103.678	101.275	88.7861	104.373	101.904	99.2405	95.0937	110.397
	101.99	108.278	106.235	97.9106	96.4738	103.332	102.159	96.9582	104.084	107.417	98.6506	92.0638	105.667	109.413	111.111	110.313	106.009	106.44	105.46	87.6242	89.3659	101.252	90.6443	95.2212	91.4498	100.056	107.855	99.294	97.3772	95.6088	91.6537	86.1839	90.6318	92.9542	102.136	94.0196	99.1913	100.526	95.6027	112.918	89.8026	103.678	101.275	88.0141	103.632	100.832	101.061	94.0253	109.454
	101.99	107.637	107.844	98.6815	96.4738	104.207	102.159	97.7465	105.805	110.171	97.8216	90.6365	104.764	111.367	112.022	110.313	106.009	108.028	102.856	86.7651	89.9697	101.252	89.7642	94.3143	92.6531	100.056	105.894	98.2807	98.7487	94.9209	92.5795	85.3471	90.6318	92.9542	101.385	93.4566	98.5025	99.8857	94.764	112.123	90.5835	103.678	101.275	89.5582	102.892	98.6862	101.972	91.8883	109.454
	102.746	106.996	108.649	99.4525	97.1391	103.332	102.159	98.5347	105.805	113.843	97.8216	89.2091	103.861	111.367	112.022	109.087	104.45	108.823	102.856	86.7651	89.9697	100.306	89.7642	94.3143	92.6531	100.056	104.913	97.2675	98.7487	96.2966	92.5795	86.1839	90.6318	92.9542	101.385	92.3306	98.5025	99.8857	94.764	112.123	91.3644	103.678	101.275	90.3302	102.892	98.6862	103.793	89.7514	109.454
	103.501	106.996	108.649	100.223	97.8044	105.083	103.141	99.323	104.945	114.761	97.8216	89.2091	102.055	110.39	111.111	107.861	103.671	109.617	101.554	86.7651	89.9697	100.306	89.7642	95.2212	91.4498	101.355	103.933	96.2543	98.7487	97.6723	92.5795	87.0206	90.6318	92.9542	101.385	91.7676	98.5025	99.2454	94.764	112.123	92.1453	103.678	101.275	91.1023	102.152	99.7589	106.524	88.6829	109.454
	103.501	106.356	108.649	100.994	98.4698	105.083	104.123	99.323	105.805	114.761	96.9926	89.2091	102.055	108.436	111.111	107.861	103.671	110.411	100.252	86.7651	90.5735	100.306	89.7642	95.2212	91.4498	101.355	101.972	95.2411	97.3772	96.9844	92.5795	88.6941	89.59	93.848	101.385	91.7676	98.5025	98.6051	94.764	113.713	92.9262	104.528	100.282	92.6464	101.412	100.832	108.345	88.6829	109.454
	105.012	106.356	110.259	100.994	98.4698	105.959	104.123	99.323	105.805	114.761	96.9926	89.9228	101.152	109.413	112.022	107.861	103.671	110.411	100.252	86.7651	90.5735	100.306	90.6443	95.2212	92.6531	101.355	100.011	95.2411	97.3772	96.9844	93.5053	89.5308	88.5483	92.0604	101.385	92.3306	97.8136	98.6051	94.764	113.713	93.7071	104.528	98.2959	93.4185	101.412	100.832	111.077	89.7514	109.454
	105.768	106.356	111.868	101.765	99.1351	105.959	104.123	100.111	105.805	113.843	96.9926	90.6365	100.249	109.413	113.843	107.861	104.45	109.617	101.554	86.7651	90.5735	100.306	90.6443	95.2212	92.6531	101.355	97.0693	94.2279	96.0057	96.9844	92.5795	89.5308	89.59	91.1666	99.8835	92.8936	97.1248	99.2454	95.6027	114.509	94.488	105.377	97.303	94.1905	102.152	100.832	111.987	89.7514	108.51
	105.768	106.356	113.478	102.536	98.4698	107.71	106.088	101.688	105.805	113.843	96.9926	90.6365	99.3454	110.39	115.665	107.861	105.23	108.823	102.856	86.7651	91.1773	99.3594	90.6443	96.128	91.4498	101.355	96.0888	94.2279	94.6342	97.6723	91.6537	89.5308	89.59	89.379	99.1325	93.4566	95.7472	100.526	96.4413	114.509	95.2688	106.227	96.3101	94.9626	102.152	99.7589	112.897	89.7514	106.623
	105.012	105.715	112.673	101.765	97.8044	107.71	107.07	102.476	104.945	114.761	96.9926	90.6365	98.4423	112.344	116.575	106.636	106.009	106.44	102.856	87.6242	92.385	99.3594	90.6443	96.128	91.4498	101.355	96.0888	95.2411	94.6342	98.3601	91.6537	89.5308	90.6318	89.379	99.8835	93.4566	95.0583	99.8857	96.4413	114.509	96.0497	107.077	96.3101	96.5067	102.152	98.6862	114.718	89.7514	105.679
	104.257	105.715	112.673	100.994	97.1391	106.834	108.053	101.688	104.945	113.843	96.9926	90.6365	99.3454	111.367	116.575	107.861	106.789	104.851	100.252	87.6242	92.385	100.306	92.4043	96.128	90.2465	100.056	96.0888	96.2543	93.2627	96.9844	91.6537	90.3675	91.6735	89.379	100.634	92.8936	95.0583	99.2454	96.4413	114.509	97.6115	107.077	97.303	97.2787	102.152	98.6862	117.45	89.7514	105.679
	103.501	106.356	112.673	99.4525	97.1391	105.959	110.017	100.9	104.084	112.925	96.9926	90.6365	99.3454	109.413	116.575	107.861	107.568	103.262	98.9504	86.7651	92.385	101.252	94.1644	96.128	90.2465	100.056	99.0303	97.2675	93.2627	96.2966	91.6537	90.3675	91.6735	90.2728	100.634	92.8936	95.0583	98.6051	96.4413	115.304	98.3924	107.927	97.303	98.8228	102.152	99.7589	118.36	89.7514	105.679
	103.501	106.356	111.063	99.4525	97.1391	105.083	109.035	102.476	103.224	112.007	96.9926	91.3502	99.3454	107.459	117.486	107.861	108.348	103.262	98.9504	86.7651	92.385	101.252	95.9245	96.128	90.2465	100.056	100.991	100.307	93.2627	96.2966	92.5795	92.041	91.6735	91.1666	102.136	92.8936	95.0583	97.9648	96.4413	116.894	99.1733	107.927	97.303	101.911	102.152	99.7589	121.092	88.6829	105.679
	102.746	106.996	110.259	98.6815	97.1391	105.083	110.017	104.053	102.364	111.089	96.9926	92.0638	100.249	107.459	117.486	107.861	109.127	102.468	96.3465	86.7651	91.7812	101.252	98.5646	96.128	89.0432	98.7561	101.972	102.334	91.8912	94.9209	94.4311	92.041	90.6318	92.9542	102.136	91.7676	94.3695	96.6842	97.2799	115.304	98.3924	107.077	96.3101	104.227	102.152	100.832	120.181	88.6829	105.679
	101.99	106.356	110.259	97.9106	95.8084	105.959	109.035	104.841	99.7834	110.171	97.8216	92.7775	100.249	107.459	117.486	109.087	109.127	102.468	96.3465	85.9061	91.1773	100.306	99.4447	97.0349	89.0432	98.7561	103.933	103.347	91.8912	94.9209	94.4311	92.8777	88.5483	93.848	101.385	90.6416	95.0583	96.6842	98.1185	116.894	98.3924	105.377	96.3101	106.543	102.152	100.832	120.181	88.6829	105.679
	104.257	105.715	110.259	97.1396	95.1431	105.959	107.07	104.841	99.7834	111.089	97.8216	92.7775	100.249	107.459	117.486	107.861	109.907	102.468	97.6484	85.9061	89.9697	99.3594	100.325	97.9418	90.2465	98.7561	105.894	104.36	90.5197	96.2966	95.3569	92.041	87.5065	93.848	101.385	90.6416	94.3695	95.4036	97.2799	116.894	99.1733	104.528	97.303	106.543	102.892	99.7589	117.45	88.6829	105.679
	105.012	105.715	109.454	97.1396	95.8084	106.834	107.07	105.629	98.9232	110.171	98.6506	92.0638	99.3454	107.459	116.575	106.636	109.127	102.468	98.9504	85.9061	89.9697	98.4131	101.205	98.8486	91.4498	100.056	108.835	105.373	90.5197	96.9844	96.2827	91.2043	86.4648	94.7418	102.136	91.2046	93.6807	95.4036	97.2799	116.099	98.3924	104.528	97.303	106.543	103.632	99.7589	114.718	88.6829	105.679
	104.257	105.074	108.649	97.1396	95.8084	105.959	107.07	105.629	99.7834	110.171	98.6506	91.3502	99.3454	106.482	115.665	105.41	108.348	104.057	100.252	86.7651	89.3659	98.4131	101.205	98.8486	92.6531	98.7561	112.757	106.386	91.8912	95.6088	97.2085	90.3675	86.4648	95.6356	101.385	91.7676	93.6807	96.0439	97.2799	116.099	98.3924	104.528	98.2959	104.999	105.113	99.7589	110.166	88.6829	106.623
	103.501	105.715	108.649	97.1396	95.8084	106.834	108.053	105.629	99.7834	110.171	97.8216	92.0638	99.3454	106.482	116.575	104.184	107.568	104.851	100.252	88.4832	89.3659	97.4668	100.325	98.8486	91.4498	98.7561	114.718	107.4	93.2627	96.2966	99.0601	89.5308	85.423	94.7418	99.8835	92.3306	94.3695	95.4036	96.4413	115.304	99.1733	104.528	98.2959	104.227	105.113	99.7589	107.435	89.7514	106.623
	104.257	106.356	109.454	97.9106	96.4738	105.959	109.035	104.841	100.644	110.171	96.9926	92.0638	99.3454	105.506	114.754	105.41	107.568	106.44	102.856	90.2014	89.3659	97.4668	100.325	99.7555	91.4498	100.056	115.699	108.413	94.6342	95.6088	99.0601	89.5308	84.3813	93.848	100.634	92.3306	95.0583	96.0439	96.4413	114.509	99.1733	104.528	99.2888	102.683	105.113	100.832	105.614	89.7514	106.623
	103.501	106.356	110.259	97.9106	96.4738	105.083	110.017	104.841	102.364	110.171	96.9926	92.7775	99.3454	106.482	114.754	106.636	107.568	108.028	105.46	92.7785	89.9697	97.4668	101.205	99.7555	91.4498	98.7561	116.679	110.439	93.2627	94.9209	99.9858	89.5308	83.3396	92.9542	99.8835	91.7676	95.0583	97.3245	96.4413	115.304	100.735	104.528	99.2888	101.139	105.113	101.904	106.524	89.7514	107.567
	103.501	106.356	108.649	98.6815	97.1391	105.959	110.999	104.841	103.224	110.171	96.1636	93.4912	100.249	106.482	114.754	109.087	108.348	108.823	110.668	94.4967	89.9697	97.4668	101.205	99.7555	91.4498	100.056	117.66	109.426	93.2627	94.9209	99.0601	90.3675	84.3813	92.0604	99.1325	90.6416	95.7472	98.6051	97.2799	113.713	100.735	104.528	99.2888	99.5949	103.632	101.904	108.345	89.7514	108.51
	103.501	106.356	108.649	97.9106	97.1391	105.083	110.999	104.841	103.224	110.171	96.1636	93.4912	99.3454	105.506	114.754	110.313	108.348	108.028	114.574	95.3557	89.9697	97.4668	101.205	100.662	90.2465	101.355	119.621	108.413	93.2627	94.2331	98.1343	91.2043	86.4648	92.9542	99.1325	90.0787	96.436	98.6051	98.1185	112.123	100.735	104.528	98.2959	98.8228	102.892	101.904	109.256	89.7514	107.567
	104.257	106.996	108.649	97.9106	97.1391	103.332	111.982	104.841	104.084	110.171	96.1636	93.4912	100.249	103.552	115.665	110.313	108.348	109.617	115.876	95.3557	89.9697	96.5205	101.205	101.569	90.2465	102.654	120.601	108.413	90.5197	93.5453	97.2085	93.7145	88.5483	92.9542	99.1325	89.5157	96.436	98.6051	98.9571	111.328	101.516	103.678	98.2959	98.0508	102.152	102.977	109.256	89.7514	107.567
	105.012	105.715	109.454	97.9106	97.1391	101.58	112.964	104.841	104.084	111.089	96.1636	93.4912	100.249	102.575	116.575	110.313	107.568	110.411	118.48	95.3557	89.9697	95.5742	99.4447	101.569	90.2465	102.654	121.582	108.413	90.5197	94.9209	96.2827	93.7145	90.6318	93.848	100.634	88.9527	96.436	98.6051	98.9571	110.533	102.297	104.528	97.303	97.2787	101.412	101.904	107.435	89.7514	107.567
	105.012	106.996	109.454	97.9106	98.4698	101.58	112.964	105.629	105.805	111.089	96.1636	94.2049	100.249	101.598	116.575	109.087	107.568	110.411	118.48	96.2148	91.7812	94.628	97.6846	101.569	90.2465	103.954	120.601	109.426	91.8912	94.9209	96.2827	93.7145	92.7153	93.848	99.8835	89.5157	97.1248	99.2454	99.7958	109.737	103.859	103.678	97.303	95.7346	100.671	100.832	107.435	89.7514	107.567
	105.012	106.996	109.454	97.9106	98.4698	102.456	111.982	106.418	104.945	111.089	96.9926	94.2049	100.249	101.598	117.486	107.861	106.789	109.617	118.48	97.0738	92.9888	92.7354	96.8045	99.7555	89.0432	103.954	123.543	109.426	91.8912	94.2331	97.2085	93.7145	94.7987	93.848	99.1325	90.0787	96.436	99.8857	99.7958	108.942	103.859	103.678	97.303	94.9626	99.9311	99.7589	107.435	90.8199	106.623
	105.768	106.996	109.454	97.1396	98.4698	101.58	111.982	107.206	104.084	112.007	97.8216	95.6322	99.3454	101.598	118.397	106.636	106.789	108.823	114.574	97.9329	94.1965	92.7354	95.9245	98.8486	89.0432	103.954	124.523	109.426	91.8912	94.9209	99.0601	92.041	95.8405	93.848	98.3815	90.6416	97.1248	100.526	99.7958	109.737	103.078	104.528	98.2959	95.7346	100.671	97.6135	106.524	92.9568	105.679
	106.523	106.356	109.454	97.1396	97.8044	101.58	111.982	107.206	104.084	112.007	97.8216	96.3459	98.4423	102.575	118.397	107.861	106.789	107.234	109.366	99.651	95.4041	92.7354	95.9245	97.9418	89.0432	103.954	125.504	108.413	90.5197	94.9209	100.912	91.2043	96.8822	92.9542	97.6305	90.6416	97.1248	101.166	98.9571	108.147	102.297	104.528	98.2959	97.2787	101.412	96.5408	104.703	95.0937	105.679
	105.768	105.715	109.454	97.9106	97.1391	100.704	111.982	107.206	104.084	111.089	96.9926	96.3459	98.4423	103.552	119.308	106.636	106.009	106.44	106.762	102.228	96.0079	93.6817	95.0445	97.0349	89.0432	105.253	127.465	108.413	90.5197	95.6088	101.837	92.041	96.8822	92.9542	96.1285	90.6416	97.1248	101.166	97.2799	108.147	102.297	105.377	98.2959	98.8228	101.412	96.5408	104.703	96.1622	105.679
	105.768	105.715	108.649	97.9106	97.1391	100.704	110.017	107.206	104.945	109.253	96.1636	96.3459	98.4423	104.529	118.397	106.636	106.009	105.645	104.158	103.087	96.6118	94.628	94.1644	96.128	89.0432	106.553	128.445	107.4	89.1482	95.6088	103.689	92.041	96.8822	91.1666	96.1285	90.0787	97.1248	101.807	96.4413	107.352	101.516	105.377	98.2959	98.8228	101.412	96.5408	103.793	96.1622	105.679
	105.768	106.356	110.259	97.9106	97.1391	99.8288	108.053	106.418	104.945	109.253	95.3346	96.3459	97.5391	105.506	116.575	107.861	106.009	105.645	102.856	103.087	96.6118	95.5742	93.2844	96.128	89.0432	107.852	129.426	105.373	89.1482	94.9209	102.763	92.8777	95.8405	90.2728	94.6264	90.0787	96.436	101.807	97.2799	107.352	101.516	106.227	98.2959	98.0508	102.152	97.6135	103.793	97.2307	104.736
	105.768	108.278	111.063	98.6815	97.1391	99.8288	107.07	104.841	104.945	109.253	96.1636	96.3459	97.5391	108.436	115.665	110.313	106.009	105.645	101.554	101.369	96.0079	95.5742	93.2844	96.128	89.0432	109.152	128.445	104.36	87.7767	95.6088	102.763	92.8777	95.8405	89.379	95.3775	90.0787	96.436	102.447	97.2799	107.352	103.078	107.077	98.2959	97.2787	102.152	96.5408	103.793	97.2307	104.736
	105.768	108.918	110.259	98.6815	97.8044	99.8288	107.07	102.476	104.084	109.253	96.1636	95.6322	98.4423	109.413	115.665	110.313	106.009	105.645	101.554	99.651	96.0079	94.628	93.2844	96.128	89.0432	111.75	128.445	104.36	87.7767	95.6088	102.763	92.8777	95.8405	88.4852	95.3775	90.6416	95.7472	102.447	97.2799	106.557	103.859	106.227	99.2888	98.0508	102.152	96.5408	103.793	97.2307	103.792
	105.768	109.559	109.454	99.4525	97.1391	100.704	107.07	100.9	104.084	108.335	96.1636	94.9185	99.3454	111.367	117.486	110.313	106.009	106.44	101.554	97.0738	96.0079	94.628	92.4043	97.0349	87.8399	113.05	127.465	105.373	89.1482	96.2966	101.837	92.8777	95.8405	89.379	96.8795	91.7676	95.7472	102.447	97.2799	104.966	105.42	106.227	101.275	98.0508	102.152	96.5408	103.793	97.2307	103.792
	104.257	109.559	108.649	98.6815	97.1391	100.704	107.07	98.5347	103.224	107.417	96.9926	95.6322	99.3454	110.39	118.397	110.313	105.23	106.44	102.856	94.4967	96.6118	95.5742	91.5243	97.0349	86.6366	113.05	125.504	107.4	90.5197	96.9844	100.912	93.7145	95.8405	89.379	96.1285	92.3306	95.7472	102.447	97.2799	104.171	106.982	105.377	102.267	98.8228	103.632	97.6135	103.793	97.2307	103.792
	104.257	108.278	107.844	97.9106	97.1391	99.8288	105.106	97.7465	104.084	107.417	96.9926	94.9185	99.3454	110.39	121.129	110.313	105.23	105.645	102.856	91.9195	96.6118	95.5742	91.5243	97.0349	86.6366	114.349	122.562	108.413	91.8912	98.3601	100.912	92.041	94.7987	90.2728	97.6305	92.8936	94.3695	101.166	98.1185	102.581	107.763	105.377	104.253	99.5949	104.373	97.6135	103.793	97.2307	104.736
	103.501	107.637	108.649	97.9106	97.8044	99.8288	105.106	96.1699	102.364	107.417	96.1636	94.9185	101.152	109.413	122.951	109.087	104.45	105.645	102.856	91.0604	97.2156	96.5205	90.6443	97.0349	86.6366	114.349	121.582	107.4	91.8912	98.3601	98.1343	90.3675	93.757	90.2728	97.6305	92.8936	93.6807	101.166	98.1185	101.785	106.982	104.528	104.253	98.8228	105.853	97.6135	102.882	96.1622	104.736
	103.501	106.356	107.844	97.1396	98.4698	100.704	105.106	95.3816	101.504	107.417	95.3346	94.9185	101.152	110.39	123.861	109.087	104.45	107.234	102.856	91.0604	97.2156	97.4668	91.5243	97.0349	87.8399	110.451	119.621	107.4	91.8912	99.0479	98.1343	88.6941	92.7153	90.2728	98.3815	92.8936	92.9918	101.166	98.1185	100.99	106.982	104.528	103.26	98.0508	105.853	96.5408	102.882	96.1622	105.679
	103.501	106.356	109.454	97.1396	97.8044	100.704	105.106	95.3816	99.7834	108.335	95.3346	94.9185	100.249	111.367	124.772	109.087	104.45	107.234	102.856	91.9195	97.2156	97.4668	91.5243	96.128	89.0432	109.152	119.621	105.373	91.8912	98.3601	96.2827	87.8573	92.7153	90.2728	99.1325	92.3306	92.9918	100.526	98.1185	101.785	106.982	105.377	103.26	98.0508	105.853	96.5408	102.882	96.1622	105.679
	103.501	105.074	110.259	97.9106	97.1391	100.704	106.088	95.3816	99.7834	108.335	95.3346	94.9185	100.249	111.367	125.683	109.087	105.23	106.44	101.554	92.7785	96.6118	97.4668	92.4043	97.0349	90.2465	110.451	119.621	103.347	91.8912	99.0479	93.5053	87.0206	92.7153	90.2728	99.8835	92.3306	92.303	101.166	98.9571	102.581	107.763	105.377	103.26	99.5949	105.853	97.6135	103.793	95.0937	105.679
	103.501	103.793	111.063	99.4525	96.4738	101.58	106.088	95.3816	99.7834	107.417	95.3346	94.2049	99.3454	112.344	124.772	111.539	105.23	107.234	101.554	91.9195	97.2156	97.4668	91.5243	97.0349	91.4498	109.152	117.66	101.32	90.5197	99.7358	92.5795	86.1839	92.7153	90.2728	101.385	92.8936	91.6142	100.526	98.9571	103.376	108.544	106.227	103.26	101.139	105.113	98.6862	105.614	94.0253	105.679
	101.99	103.793	111.868	100.994	97.1391	101.58	105.106	95.3816	101.504	108.335	96.1636	93.4912	99.3454	113.321	124.772	112.764	105.23	105.645	100.252	91.0604	96.6118	96.5205	90.6443	97.0349	92.6531	111.75	115.699	100.307	90.5197	99.0479	92.5795	85.3471	91.6735	90.2728	102.887	93.4566	91.6142	102.447	99.7958	104.171	109.325	106.227	103.26	101.911	104.373	98.6862	106.524	94.0253	104.736
	102.746	103.793	111.868	102.536	96.4738	100.704	103.141	95.3816	101.504	108.335	96.1636	93.4912	100.249	113.321	124.772	111.539	105.23	105.645	100.252	91.0604	97.2156	97.4668	90.6443	97.0349	92.6531	111.75	113.738	99.294	90.5197	99.7358	91.6537	86.1839	91.6735	90.2728	103.638	93.4566	92.303	103.087	100.634	104.966	110.106	105.377	102.267	101.911	104.373	98.6862	108.345	92.9568	103.792
	102.746	103.793	110.259	103.307	96.4738	101.58	102.159	95.3816	103.224	108.335	96.9926	92.0638	100.249	113.321	123.861	110.313	104.45	106.44	100.252	90.2014	96.0079	97.4668	90.6443	96.128	93.8564	113.05	110.796	98.2807	90.5197	100.424	91.6537	86.1839	91.6735	92.0604	104.389	93.4566	91.6142	103.087	101.473	105.761	110.887	104.528	100.282	101.911	104.373	97.6135	110.166	91.8883	101.905
	102.746	104.433	108.649	103.307	96.4738	103.332	102.159	94.5933	104.084	108.335	96.9926	92.0638	101.152	111.367	122.951	110.313	103.671	108.823	101.554	90.2014	95.4041	97.4668	91.5243	94.3143	92.6531	113.05	109.816	99.294	90.5197	100.424	91.6537	87.8573	92.7153	92.9542	105.14	94.0196	91.6142	103.727	101.473	106.557	111.668	103.678	99.2888	100.367	104.373	98.6862	111.077	90.8199	101.905
	101.99	105.074	107.039	103.307	97.1391	103.332	103.141	93.8051	103.224	107.417	97.8216	92.7775	101.152	108.436	124.772	110.313	102.112	112	102.856	91.0604	94.1965	97.4668	90.6443	94.3143	91.4498	114.349	104.913	99.294	89.1482	100.424	90.7279	87.0206	92.7153	93.848	105.14	94.5826	91.6142	104.368	100.634	107.352	111.668	102.828	100.282	100.367	103.632	98.6862	111.987	88.6829	101.905
	101.99	105.715	105.43	102.536	96.4738	103.332	103.141	93.8051	104.084	107.417	96.9926	92.7775	102.055	106.482	125.683	110.313	102.112	113.589	106.762	91.0604	93.5926	96.5205	90.6443	94.3143	91.4498	115.649	104.913	99.294	90.5197	100.424	91.6537	87.8573	92.7153	93.848	105.14	94.0196	92.303	104.368	99.7958	107.352	110.887	102.828	101.275	101.139	104.373	98.6862	110.166	87.6145	101.905
	101.99	106.996	106.235	102.536	97.1391	103.332	104.123	94.5933	103.224	107.417	95.3346	92.7775	102.055	106.482	127.504	111.539	102.112	113.589	108.064	90.2014	94.1965	95.5742	90.6443	94.3143	90.2465	116.948	101.972	100.307	91.8912	99.7358	90.7279	87.0206	93.757	95.6356	105.14	93.4566	92.9918	103.727	98.9571	106.557	110.887	103.678	101.275	102.683	104.373	99.7589	110.166	87.6145	100.962
	101.235	106.996	107.039	103.307	96.4738	101.58	104.123	95.3816	104.945	106.498	95.3346	92.0638	102.055	105.506	129.326	112.764	102.112	114.383	108.064	89.3423	95.4041	95.5742	89.7642	94.3143	90.2465	116.948	100.991	101.32	90.5197	99.0479	90.7279	87.8573	94.7987	97.4231	104.389	92.8936	93.6807	103.087	98.1185	105.761	110.106	104.528	101.275	103.455	104.373	99.7589	109.256	87.6145	100.018
	100.479	106.996	107.039	104.078	95.8084	100.704	103.141	95.3816	104.945	107.417	95.3346	92.7775	102.958	107.459	130.237	112.764	102.112	115.177	106.762	87.6242	96.6118	94.628	89.7642	94.3143	90.2465	116.948	100.011	102.334	90.5197	98.3601	89.8021	87.8573	96.8822	97.4231	102.136	92.3306	93.6807	102.447	97.2799	103.376	110.106	104.528	99.2888	104.227	104.373	99.7589	108.345	87.6145	100.018
	99.7237	106.996	107.844	103.307	95.8084	99.8288	103.141	96.1699	104.945	107.417	95.3346	92.7775	102.958	108.436	130.237	113.99	102.891	115.972	105.46	88.4832	97.2156	94.628	90.6443	94.3143	90.2465	118.247	100.991	101.32	89.1482	97.6723	91.6537	88.6941	97.924	96.5294	100.634	91.7676	94.3695	103.087	97.2799	100.195	110.887	105.377	98.2959	102.683	104.373	99.7589	108.345	87.6145	100.018
	98.9682	107.637	106.235	102.536	95.1431	99.8288	104.123	96.1699	106.665	107.417	96.1636	92.0638	102.958	109.413	131.147	115.216	102.891	115.972	104.158	89.3423	97.2156	95.5742	90.6443	94.3143	91.4498	114.349	100.991	100.307	89.1482	97.6723	93.5053	87.0206	97.924	96.5294	99.1325	91.2046	94.3695	103.087	98.1185	99.3999	110.887	104.528	97.303	101.911	104.373	99.7589	108.345	87.6145	100.018
	98.2127	107.637	104.625	102.536	95.1431	101.58	104.123	96.1699	106.665	107.417	96.1636	92.0638	102.055	110.39	131.147	115.216	102.891	116.766	104.158	89.3423	96.6118	96.5205	91.5243	94.3143	92.6531	114.349	101.972	99.294	89.1482	96.9844	93.5053	87.0206	98.9657	96.5294	98.3815	90.6416	94.3695	101.807	99.7958	100.99	110.887	104.528	96.3101	102.683	103.632	98.6862	108.345	86.546	100.018
	98.2127	106.996	103.015	102.536	95.1431	103.332	104.123	96.1699	106.665	107.417	95.3346	92.0638	101.152	110.39	129.326	112.764	103.671	116.766	105.46	90.2014	96.0079	96.5205	91.5243	95.2212	92.6531	113.05	102.952	99.294	89.1482	96.2966	94.4311	87.0206	98.9657	95.6356	97.6305	90.0787	95.0583	101.166	98.9571	100.195	110.887	104.528	96.3101	102.683	103.632	97.6135	108.345	86.546	100.018
	98.2127	106.996	102.211	102.536	95.8084	103.332	105.106	96.9582	105.805	106.498	94.5056	92.0638	100.249	109.413	128.415	111.539	103.671	116.766	106.762	91.0604	94.8003	94.628	91.5243	95.2212	93.8564	110.451	101.972	99.294	89.1482	96.2966	95.3569	87.0206	98.9657	95.6356	96.8795	89.5157	95.0583	101.166	99.7958	100.195	110.887	104.528	95.3172	101.139	102.892	96.5408	108.345	87.6145	100.018
	98.9682	106.356	102.211	101.765	95.1431	103.332	106.088	97.7465	104.084	105.58	94.5056	92.0638	99.3454	110.39	127.504	111.539	103.671	114.383	106.762	91.0604	94.1965	93.6817	92.4043	95.2212	92.6531	109.152	100.991	99.294	89.1482	97.6723	98.1343	87.8573	98.9657	95.6356	96.1285	89.5157	96.436	100.526	99.7958	101.785	110.106	104.528	95.3172	99.5949	102.892	95.4682	108.345	87.6145	100.018
	100.479	106.996	103.015	100.994	95.1431	101.58	106.088	98.5347	104.084	105.58	94.5056	92.7775	99.3454	108.436	127.504	111.539	103.671	114.383	106.762	91.9195	93.5926	91.7891	93.2844	96.128	92.6531	106.553	101.972	98.2807	89.1482	96.2966	99.0601	89.5308	98.9657	94.7418	96.8795	89.5157	97.1248	101.166	99.7958	101.785	109.325	105.377	94.3243	97.2787	102.892	95.4682	108.345	87.6145	99.0745
	101.235	106.356	103.015	100.223	94.4778	100.704	107.07	98.5347	103.224	104.662	93.6766	92.7775	97.5391	110.39	126.594	111.539	104.45	113.589	105.46	93.6376	91.7812	92.7354	93.2844	96.128	91.4498	103.954	102.952	96.2543	90.5197	96.2966	100.912	90.3675	100.007	94.7418	96.1285	90.0787	97.8136	101.166	98.9571	101.785	108.544	105.377	93.3315	95.7346	102.892	95.4682	106.524	87.6145	98.1309
	102.746	105.715	102.211	100.223	94.4778	100.704	107.07	99.323	104.084	104.662	93.6766	92.7775	97.5391	111.367	124.772	111.539	105.23	112.794	105.46	94.4967	89.9697	92.7354	91.5243	96.128	91.4498	103.954	101.972	95.2411	90.5197	96.2966	100.912	91.2043	100.007	94.7418	96.8795	90.0787	99.1913	100.526	98.9571	102.581	108.544	105.377	92.3386	94.1905	102.892	96.5408	105.614	86.546	96.2438
	103.501	106.356	102.211	100.994	94.4778	101.58	108.053	100.111	104.945	104.662	92.8476	92.7775	97.5391	111.367	124.772	111.539	106.009	112	105.46	94.4967	88.762	94.628	89.7642	96.128	91.4498	102.654	103.933	95.2411	90.5197	96.2966	101.837	92.041	98.9657	94.7418	95.3775	90.0787	99.8801	99.2454	98.9571	101.785	107.763	104.528	93.3315	94.1905	102.152	96.5408	104.703	85.4775	95.3002
	103.501	106.356	103.015	100.994	95.1431	102.456	108.053	100.9	104.945	105.58	92.8476	92.0638	98.4423	111.367	124.772	111.539	108.348	111.206	104.158	93.6376	88.762	96.5205	88.8842	96.128	91.4498	101.355	103.933	95.2411	89.1482	96.9844	99.9858	92.041	96.8822	93.848	96.1285	89.5157	100.569	99.2454	98.1185	101.785	107.763	105.377	95.3172	94.9626	102.892	97.6135	106.524	85.4775	95.3002
	102.746	105.715	103.82	101.765	95.1431	101.58	109.035	103.264	104.084	105.58	92.8476	92.0638	100.249	110.39	123.861	111.539	109.127	109.617	102.856	92.7785	89.3659	98.4131	87.1241	95.2212	90.2465	102.654	104.913	95.2411	90.5197	97.6723	98.1343	92.041	95.8405	93.848	96.8795	88.9527	99.8801	98.6051	98.1185	100.195	107.763	106.227	97.303	95.7346	102.152	98.6862	104.703	86.546	95.3002
	102.746	105.074	104.625	100.994	95.1431	103.332	110.017	105.629	104.084	105.58	92.8476	92.0638	102.958	109.413	123.861	111.539	109.127	108.823	102.856	91.9195	89.9697	99.3594	87.1241	94.3143	90.2465	101.355	104.913	95.2411	90.5197	97.6723	97.2085	92.8777	95.8405	93.848	96.8795	87.8267	99.1913	97.9648	98.1185	98.6047	106.982	107.927	99.2888	97.2787	102.152	98.6862	103.793	86.546	95.3002
	103.501	105.074	105.43	100.994	95.1431	102.456	110.999	107.994	102.364	105.58	93.6766	92.7775	104.764	106.482	123.861	110.313	109.907	108.028	104.158	90.2014	91.1773	99.3594	87.1241	93.4074	90.2465	101.355	104.913	94.2279	90.5197	97.6723	96.2827	91.2043	94.7987	93.848	95.3775	87.2637	98.5025	97.3245	99.7958	98.6047	106.201	107.927	100.282	99.5949	102.152	99.7589	102.882	86.546	96.2438
	103.501	105.074	104.625	100.994	94.4778	102.456	110.999	108.782	101.504	106.498	93.6766	93.4912	106.571	105.506	124.772	109.087	108.348	108.028	105.46	89.3423	91.7812	98.4131	87.1241	92.5006	90.2465	101.355	104.913	96.2543	90.5197	98.3601	96.2827	89.5308	93.757	93.848	96.1285	87.2637	97.8136	96.6842	100.634	99.3999	105.42	107.927	101.275	101.139	102.152	97.6135	101.972	86.546	97.1873
	102.746	105.715	104.625	100.223	95.1431	101.58	110.017	108.782	100.644	106.498	93.6766	94.2049	108.377	105.506	124.772	109.087	106.789	108.823	106.762	89.3423	92.9888	98.4131	88.0041	92.5006	90.2465	101.355	105.894	97.2675	90.5197	97.6723	96.2827	88.6941	92.7153	94.7418	96.1285	87.8267	97.8136	97.3245	101.473	99.3999	103.859	107.927	100.282	102.683	102.152	97.6135	101.061	86.546	96.2438
	103.501	105.715	103.82	100.223	95.8084	101.58	109.035	107.994	100.644	106.498	95.3346	94.9185	108.377	104.529	123.861	109.087	105.23	108.823	108.064	89.3423	92.9888	99.3594	88.8842	91.5937	89.0432	100.056	107.855	97.2675	91.8912	97.6723	97.2085	87.8573	92.7153	94.7418	95.3775	88.3897	97.8136	96.6842	101.473	100.99	101.516	107.927	99.2888	104.227	102.152	95.4682	100.151	86.546	96.2438
	103.501	106.356	104.625	100.223	95.8084	102.456	108.053	107.206	101.504	107.417	94.5056	95.6322	107.474	105.506	122.951	110.313	102.891	108.028	108.064	91.0604	92.9888	99.3594	88.8842	91.5937	89.0432	100.056	107.855	97.2675	91.8912	96.2966	96.2827	87.8573	93.757	95.6356	95.3775	88.9527	98.5025	96.6842	101.473	101.785	99.9542	107.927	99.2888	104.227	102.892	95.4682	100.151	87.6145	95.3002
	103.501	105.715	104.625	100.223	95.8084	101.58	108.053	106.418	102.364	108.335	94.5056	95.6322	107.474	107.459	122.04	110.313	101.332	108.823	106.762	92.7785	92.9888	99.3594	89.7642	91.5937	89.0432	100.056	106.874	97.2675	91.8912	96.2966	96.2827	86.1839	93.757	97.4231	96.1285	88.9527	98.5025	96.6842	101.473	103.376	99.9542	107.927	98.2959	104.999	102.892	96.5408	100.151	87.6145	95.3002
	103.501	106.356	104.625	100.223	95.8084	101.58	108.053	104.841	104.084	109.253	95.3346	95.6322	107.474	109.413	121.129	112.764	100.553	108.028	105.46	94.4967	92.385	99.3594	91.5243	91.5937	89.0432	101.355	107.855	97.2675	91.8912	97.6723	96.2827	85.3471	93.757	98.3169	96.1285	88.3897	99.1913	96.0439	100.634	102.581	101.516	107.077	98.2959	104.999	103.632	97.6135	99.2405	86.546	95.3002
	102.746	107.637	104.625	99.4525	95.8084	100.704	108.053	104.053	104.945	110.171	94.5056	96.3459	107.474	107.459	119.308	113.99	99.7734	108.823	105.46	97.0738	91.7812	99.3594	92.4043	91.5937	90.2465	101.355	108.835	97.2675	90.5197	98.3601	96.2827	85.3471	91.6735	98.3169	96.1285	87.8267	99.1913	96.6842	99.7958	102.581	102.297	107.077	98.2959	104.227	104.373	98.6862	99.2405	84.4091	96.2438
	103.501	106.996	103.82	100.223	95.8084	101.58	108.053	103.264	106.665	112.007	94.5056	95.6322	107.474	104.529	118.397	116.441	99.7734	108.028	105.46	98.792	91.7812	99.3594	93.2844	92.5006	91.4498	101.355	108.835	97.2675	90.5197	98.3601	96.2827	85.3471	89.59	98.3169	96.1285	87.8267	99.1913	96.6842	98.1185	102.581	103.078	106.227	98.2959	102.683	104.373	97.6135	99.2405	84.4091	97.1873
	102.746	107.637	103.015	101.765	95.8084	100.704	107.07	102.476	106.665	111.089	93.6766	95.6322	106.571	102.575	117.486	117.667	98.9939	108.028	105.46	98.792	91.7812	100.306	94.1644	93.4074	92.6531	102.654	108.835	97.2675	89.1482	99.7358	96.2827	85.3471	88.5483	97.4231	96.1285	87.8267	99.1913	96.0439	96.4413	103.376	102.297	106.227	98.2959	102.683	103.632	94.3955	98.33	84.4091	97.1873
	102.746	106.996	102.211	102.536	95.1431	100.704	106.088	102.476	106.665	109.253	93.6766	95.6322	106.571	101.598	117.486	120.118	98.9939	108.823	106.762	98.792	91.7812	101.252	93.2844	94.3143	95.0597	101.355	106.874	97.2675	89.1482	100.424	97.2085	86.1839	88.5483	97.4231	97.6305	88.3897	98.5025	96.6842	96.4413	104.966	102.297	105.377	98.2959	101.911	103.632	93.3228	98.33	84.4091	98.1309
	103.501	105.715	103.015	103.307	95.1431	100.704	105.106	102.476	104.945	107.417	92.8476	94.9185	106.571	100.621	116.575	120.118	98.9939	109.617	108.064	98.792	91.7812	101.252	92.4043	94.3143	95.0597	102.654	105.894	96.2543	89.1482	99.0479	96.2827	86.1839	87.5065	96.5294	99.8835	88.3897	97.8136	96.0439	95.6027	104.171	103.078	105.377	99.2888	100.367	103.632	92.2501	95.5986	84.4091	100.018
	101.99	105.074	103.82	102.536	96.4738	100.704	104.123	102.476	104.084	107.417	92.8476	94.9185	106.571	101.598	115.665	117.667	98.2144	110.411	108.064	98.792	91.1773	101.252	92.4043	95.2212	96.2629	102.654	104.913	96.2543	89.1482	99.0479	94.4311	86.1839	88.5483	97.4231	100.634	88.9527	97.8136	96.0439	96.4413	104.966	103.078	107.077	99.2888	98.8228	102.892	93.3228	93.7777	84.4091	100.962
	101.99	105.074	104.625	100.994	96.4738	101.58	104.123	103.264	103.224	107.417	93.6766	94.2049	105.667	103.552	115.665	116.441	98.2144	111.206	109.366	98.792	90.5735	100.306	92.4043	94.3143	96.2629	101.355	104.913	96.2543	89.1482	99.0479	92.5795	86.1839	88.5483	97.4231	100.634	89.5157	97.1248	96.6842	98.1185	102.581	103.078	107.927	100.282	98.8228	102.152	93.3228	91.0463	84.4091	101.905
	99.7237	105.074	106.235	100.994	96.4738	100.704	103.141	104.053	104.084	108.335	94.5056	93.4912	104.764	105.506	115.665	116.441	97.4349	112.794	110.668	98.792	89.9697	98.4131	92.4043	93.4074	95.0597	101.355	103.933	96.2543	87.7767	98.3601	92.5795	87.0206	88.5483	97.4231	101.385	90.0787	97.1248	96.6842	98.9571	100.99	103.078	107.927	100.282	99.5949	101.412	93.3228	89.2254	85.4775	100.962
	98.9682	105.074	105.43	100.223	96.4738	100.704	101.176	104.053	104.945	108.335	95.3346	93.4912	103.861	107.459	114.754	115.216	97.4349	113.589	111.97	98.792	90.5735	98.4131	92.4043	92.5006	95.0597	100.056	102.952	95.2411	87.7767	97.6723	93.5053	87.8573	89.59	97.4231	101.385	90.6416	97.8136	96.6842	99.7958	100.195	103.078	107.927	99.2888	101.139	100.671	93.3228	91.0463	87.6145	100.962
	98.2127	105.074	106.235	100.223	97.1391	99.8288	101.176	104.053	105.805	108.335	95.3346	93.4912	104.764	109.413	113.843	116.441	98.2144	115.177	115.876	100.51	91.1773	97.4668	91.5243	92.5006	95.0597	101.355	101.972	96.2543	87.7767	97.6723	92.5795	88.6941	89.59	96.5294	101.385	91.2046	98.5025	96.6842	100.634	101.785	103.859	108.777	98.2959	101.911	100.671	94.3955	92.8672	87.6145	100.018
	98.9682	105.074	107.039	100.994	97.8044	98.9531	101.176	103.264	104.945	107.417	94.5056	94.2049	104.764	110.39	113.843	117.667	98.2144	115.972	115.876	101.369	91.7812	96.5205	89.7642	93.4074	93.8564	102.654	101.972	95.2411	86.4051	96.9844	92.5795	88.6941	90.6318	97.4231	102.136	91.2046	99.1913	96.6842	100.634	102.581	103.859	107.927	98.2959	101.911	100.671	94.3955	93.7777	86.546	100.018
	98.9682	105.715	108.649	100.994	98.4698	98.9531	102.159	103.264	106.665	107.417	94.5056	94.2049	105.667	110.39	112.022	118.893	98.9939	115.972	113.272	103.087	91.7812	96.5205	88.8842	94.3143	95.0597	103.954	100.991	94.2279	86.4051	97.6723	92.5795	88.6941	91.6735	96.5294	102.136	91.2046	99.1913	96.6842	101.473	104.171	104.64	106.227	98.2959	101.911	99.9311	95.4682	95.5986	85.4775	98.1309
	100.479	106.996	110.259	100.994	98.4698	98.9531	102.159	103.264	107.525	107.417	94.5056	94.2049	106.571	109.413	110.2	120.118	99.7734	117.56	110.668	103.946	91.1773	96.5205	88.0041	94.3143	96.2629	103.954	101.972	94.2279	86.4051	97.6723	93.5053	88.6941	91.6735	95.6356	102.136	91.2046	99.1913	97.3245	101.473	105.761	103.078	105.377	100.282	100.367	100.671	95.4682	95.5986	85.4775	99.0745
	100.479	107.637	110.259	101.765	98.4698	99.8288	103.141	104.053	106.665	107.417	94.5056	94.9185	106.571	108.436	109.289	121.344	101.332	118.355	111.97	103.946	90.5735	96.5205	87.1241	95.2212	96.2629	103.954	102.952	93.2147	87.7767	97.6723	96.2827	88.6941	91.6735	94.7418	102.887	91.2046	99.1913	97.3245	102.312	105.761	103.078	104.528	101.275	99.5949	100.671	94.3955	97.4196	84.4091	100.018
	100.479	107.637	109.454	101.765	97.8044	99.8288	103.141	105.629	104.945	108.335	94.5056	94.9185	105.667	108.436	108.379	121.344	102.112	116.766	111.97	103.946	89.9697	95.5742	87.1241	95.2212	96.2629	102.654	104.913	92.2015	89.1482	97.6723	97.2085	88.6941	91.6735	94.7418	103.638	91.2046	99.1913	97.9648	102.312	105.761	103.859	104.528	102.267	98.8228	101.412	93.3228	97.4196	84.4091	101.905
	99.7237	107.637	108.649	101.765	97.1391	100.704	103.141	107.206	104.084	109.253	94.5056	94.9185	104.764	106.482	109.289	120.118	102.112	116.766	111.97	103.946	89.3659	95.5742	87.1241	96.128	97.4662	100.056	106.874	91.1883	89.1482	97.6723	97.2085	88.6941	92.7153	94.7418	105.14	91.2046	99.1913	97.9648	102.312	106.557	104.64	105.377	102.267	97.2787	100.671	93.3228	98.33	84.4091	102.849
	99.7237	107.637	108.649	102.536	96.4738	100.704	102.159	107.994	104.084	109.253	94.5056	95.6322	103.861	106.482	109.289	118.893	102.112	115.972	113.272	103.946	88.762	95.5742	88.0041	96.128	98.6695	98.7561	108.835	91.1883	90.5197	98.3601	97.2085	89.5308	93.757	95.6356	107.394	91.2046	99.8801	97.3245	102.312	108.147	105.42	106.227	101.275	95.7346	100.671	93.3228	99.2405	84.4091	102.849
	98.9682	108.918	108.649	102.536	96.4738	100.704	101.176	108.782	103.224	108.335	94.5056	94.9185	104.764	105.506	109.289	117.667	102.891	116.766	113.272	105.664	88.762	96.5205	88.0041	95.2212	97.4662	97.4567	109.816	91.1883	90.5197	96.9844	96.2827	90.3675	94.7987	97.4231	108.896	91.2046	98.5025	97.3245	101.473	108.147	105.42	106.227	102.267	95.7346	100.671	93.3228	100.151	85.4775	102.849
	98.9682	108.918	109.454	101.765	96.4738	100.704	100.194	107.994	102.364	107.417	94.5056	94.9185	104.764	105.506	109.289	116.441	103.671	115.972	113.272	105.664	88.762	97.4668	87.1241	94.3143	96.2629	97.4567	110.796	92.2015	91.8912	96.2966	96.2827	90.3675	94.7987	99.2107	111.149	91.2046	98.5025	97.3245	101.473	108.147	106.201	106.227	102.267	96.5067	101.412	92.2501	102.882	86.546	100.962
	98.2127	109.559	109.454	101.765	96.4738	99.8288	99.2119	107.206	102.364	107.417	94.5056	94.2049	105.667	104.529	110.2	113.99	105.23	115.972	114.574	106.524	88.762	97.4668	86.244	94.3143	96.2629	97.4567	110.796	93.2147	91.8912	96.2966	97.2085	91.2043	94.7987	100.105	111.149	91.2046	99.1913	97.9648	100.634	108.942	106.982	106.227	104.253	98.8228	101.412	92.2501	103.793	87.6145	99.0745
	98.9682	108.918	109.454	101.765	96.4738	99.8288	98.2296	105.629	102.364	108.335	94.5056	94.9185	106.571	103.552	109.289	113.99	106.009	117.56	118.48	106.524	89.3659	98.4131	86.244	93.4074	96.2629	97.4567	109.816	94.2279	91.8912	95.6088	98.1343	91.2043	92.7153	100.998	110.398	92.3306	99.8801	97.9648	99.7958	108.942	106.982	106.227	105.246	101.139	101.412	92.2501	104.703	87.6145	98.1309
	98.2127	108.918	107.844	101.765	97.1391	98.9531	97.2473	104.841	103.224	109.253	93.6766	94.9185	105.667	103.552	109.289	113.99	107.568	116.766	118.48	108.242	89.9697	97.4668	86.244	93.4074	98.6695	97.4567	111.777	95.2411	90.5197	94.9209	99.0601	92.041	91.6735	102.786	110.398	92.8936	99.8801	97.9648	98.1185	109.737	107.763	105.377	105.246	102.683	101.412	93.3228	104.703	87.6145	98.1309
	99.7237	108.278	108.649	100.994	97.1391	98.9531	97.2473	105.629	104.945	110.171	93.6766	94.9185	104.764	102.575	111.111	113.99	108.348	116.766	119.782	109.101	89.3659	96.5205	87.1241	93.4074	98.6695	98.7561	114.718	95.2411	89.1482	94.2331	99.9858	92.8777	89.59	102.786	108.896	92.8936	99.8801	97.9648	98.1185	109.737	109.325	106.227	105.246	103.455	102.152	94.3955	105.614	88.6829	98.1309
	100.479	108.278	108.649	100.223	97.1391	98.0774	98.2296	106.418	105.805	109.253	93.6766	94.2049	104.764	102.575	112.022	113.99	109.907	115.177	119.782	109.101	89.3659	95.5742	88.0041	92.5006	98.6695	98.7561	115.699	96.2543	87.7767	94.2331	101.837	93.7145	89.59	102.786	108.145	93.4566	99.8801	99.2454	97.2799	111.328	110.106	107.077	105.246	105.771	102.152	93.3228	103.793	88.6829	99.0745
	99.7237	107.637	109.454	100.223	97.1391	98.0774	98.2296	107.994	106.665	108.335	92.8476	94.2049	102.958	101.598	111.111	115.216	111.466	115.177	119.782	109.101	88.1582	95.5742	89.7642	92.5006	98.6695	97.4567	114.718	97.2675	87.7767	93.5453	101.837	93.7145	89.59	102.786	108.145	94.0196	100.569	99.8857	97.2799	111.328	110.887	107.077	105.246	107.315	102.892	93.3228	102.882	88.6829	99.0745
	99.7237	106.996	111.063	100.223	97.8044	98.0774	99.2119	109.571	107.525	107.417	93.6766	93.4912	102.055	100.621	109.289	116.441	113.804	115.177	118.48	107.383	86.3468	94.628	89.7642	92.5006	97.4662	98.7561	112.757	99.294	87.7767	93.5453	103.689	93.7145	89.59	101.892	108.896	94.0196	101.947	101.166	98.1185	111.328	110.887	107.077	105.246	107.315	102.892	93.3228	100.151	87.6145	100.018
	98.9682	106.356	111.868	100.994	98.4698	98.0774	100.194	111.935	107.525	106.498	93.6766	92.7775	102.055	99.6441	109.289	117.667	116.142	115.972	117.178	104.805	86.9506	95.5742	90.6443	91.5937	99.8728	98.7561	109.816	99.294	86.4051	93.5453	103.689	93.7145	88.5483	101.892	108.145	94.0196	102.635	101.166	99.7958	110.533	111.668	107.077	106.239	108.86	102.892	93.3228	99.2405	87.6145	100.962
	98.2127	106.356	111.868	101.765	99.1351	98.0774	99.2119	114.3	107.525	104.662	92.8476	92.7775	102.055	99.6441	109.289	118.893	117.701	115.972	115.876	103.946	87.5544	96.5205	90.6443	90.6868	101.076	100.056	104.913	99.294	86.4051	93.5453	103.689	92.8777	88.5483	101.892	108.896	94.5826	102.635	101.166	100.634	110.533	110.887	106.227	107.232	108.087	102.892	93.3228	99.2405	87.6145	100.018
	98.9682	105.715	111.868	103.307	99.1351	97.2017	98.2296	116.665	106.665	103.744	92.8476	92.7775	102.958	100.621	109.289	118.893	117.701	116.766	114.574	103.946	87.5544	95.5742	89.7642	89.78	103.483	100.056	100.991	99.294	85.0336	94.2331	103.689	92.041	89.59	101.892	111.149	94.5826	103.324	99.8857	99.7958	109.737	110.887	105.377	108.225	107.315	102.892	93.3228	101.061	88.6829	100.018
	98.9682	105.074	111.063	102.536	99.1351	97.2017	98.2296	117.453	105.805	102.826	92.8476	92.7775	102.958	100.621	111.111	118.893	117.701	116.766	117.178	103.946	88.1582	95.5742	89.7642	89.78	103.483	101.355	99.0303	99.294	83.6621	94.2331	101.837	90.3675	89.59	101.892	111.149	94.5826	104.013	99.8857	98.9571	109.737	110.887	104.528	108.225	105.771	101.412	94.3955	101.972	89.7514	99.0745
	100.479	105.074	111.868	101.765	98.4698	97.2017	98.2296	118.242	105.805	102.826	93.6766	92.7775	102.958	101.598	111.111	117.667	116.922	115.972	114.574	103.946	89.3659	95.5742	89.7642	90.6868	103.483	101.355	97.0693	100.307	83.6621	94.2331	99.9858	88.6941	88.5483	101.892	111.149	94.5826	103.324	99.8857	98.1185	109.737	110.106	102.828	109.218	104.999	100.671	95.4682	104.703	90.8199	99.0745
	101.235	105.715	111.868	100.994	98.4698	97.2017	98.2296	118.242	106.665	102.826	94.5056	94.2049	102.958	101.598	112.022	115.216	116.142	114.383	110.668	103.946	90.5735	94.628	89.7642	91.5937	102.279	100.056	97.0693	101.32	83.6621	94.2331	99.9858	87.0206	87.5065	100.998	111.9	94.5826	103.324	99.8857	97.2799	109.737	109.325	101.128	109.218	104.999	99.9311	96.5408	107.435	92.9568	99.0745
	101.235	105.715	111.063	100.223	99.1351	97.2017	99.2119	118.242	106.665	102.826	95.3346	95.6322	103.861	99.6441	112.932	113.99	115.363	113.589	109.366	104.805	90.5735	93.6817	89.7642	91.5937	101.076	100.056	96.0888	102.334	83.6621	94.9209	99.0601	83.6736	86.4648	100.105	111.9	94.0196	102.635	100.526	98.1185	109.737	109.325	99.4287	109.218	104.999	99.9311	95.4682	110.166	94.0253	99.0745
	100.479	105.715	110.259	100.223	99.8004	97.2017	101.176	118.242	107.525	103.744	94.5056	96.3459	104.764	99.6441	113.843	112.764	116.142	113.589	108.064	105.664	91.1773	93.6817	90.6443	92.5006	99.8728	100.056	96.0888	102.334	83.6621	95.6088	97.2085	82.8369	86.4648	100.105	111.149	94.0196	103.324	100.526	98.1185	109.737	109.325	98.5789	110.211	105.771	99.9311	94.3955	111.077	95.0937	100.018
	100.479	105.715	109.454	100.994	100.466	97.2017	102.159	119.818	107.525	104.662	94.5056	96.3459	104.764	99.6441	113.843	109.087	116.922	113.589	109.366	107.383	92.385	94.628	92.4043	93.4074	99.8728	98.7561	97.0693	101.32	83.6621	96.2966	97.2085	83.6736	86.4648	100.105	109.647	92.8936	104.013	100.526	98.1185	107.352	110.106	99.4287	111.203	106.543	99.9311	93.3228	111.987	95.0937	100.962
	98.9682	105.074	108.649	100.994	101.796	97.2017	104.123	120.607	106.665	105.58	93.6766	95.6322	104.764	100.621	114.754	107.861	117.701	113.589	110.668	109.101	92.385	94.628	90.6443	93.4074	98.6695	100.056	98.0498	101.32	82.2906	97.6723	97.2085	85.3471	87.5065	100.105	108.896	92.3306	104.013	101.166	97.2799	104.966	110.106	101.978	113.189	107.315	99.9311	91.1775	111.077	96.1622	100.962
	98.9682	104.433	108.649	101.765	102.462	96.326	105.106	120.607	105.805	107.417	92.8476	94.2049	103.861	101.598	114.754	106.636	117.701	114.383	114.574	109.96	92.385	94.628	89.7642	93.4074	99.8728	100.056	99.0303	101.32	82.2906	98.3601	95.3569	87.8573	88.5483	100.105	108.896	92.8936	103.324	101.166	98.1185	102.581	110.887	103.678	115.175	108.86	99.9311	90.1048	110.166	96.1622	101.905
	98.9682	103.793	109.454	102.536	102.462	96.326	105.106	119.818	105.805	109.253	92.8476	92.7775	103.861	103.552	113.843	106.636	117.701	114.383	115.876	109.96	92.9888	94.628	88.8842	93.4074	101.076	100.056	99.0303	102.334	82.2906	98.3601	95.3569	89.5308	88.5483	100.105	107.394	93.4566	102.635	101.166	98.9571	101.785	111.668	105.377	116.168	109.632	99.9311	90.1048	109.256	96.1622	102.849
	99.7237	103.152	108.649	103.307	101.796	95.4503	105.106	119.03	105.805	110.171	93.6766	91.3502	104.764	106.482	112.932	105.41	116.922	114.383	115.876	109.96	92.9888	95.5742	88.0041	92.5006	102.279	101.355	99.0303	101.32	83.6621	98.3601	96.2827	89.5308	87.5065	100.105	106.643	94.0196	101.258	100.526	99.7958	100.99	112.448	107.077	117.161	111.176	99.9311	90.1048	111.077	96.1622	104.736
	100.479	103.152	108.649	104.078	101.796	94.5746	104.123	118.242	104.945	111.089	93.6766	91.3502	104.764	107.459	112.022	105.41	116.922	112.794	114.574	109.96	93.5926	95.5742	88.8842	90.6868	102.279	101.355	98.0498	101.32	86.4051	99.7358	96.2827	89.5308	86.4648	100.998	105.892	95.1456	101.258	99.8857	98.9571	99.3999	113.229	109.627	117.161	111.176	99.9311	91.1775	111.077	96.1622	105.679
	99.7237	103.793	108.649	104.849	101.796	94.5746	104.123	118.242	104.945	111.089	93.6766	92.0638	103.861	107.459	111.111	105.41	116.142	112	114.574	109.96	94.1965	96.5205	89.7642	89.78	102.279	102.654	100.011	101.32	86.4051	98.3601	98.1343	87.8573	86.4648	100.105	103.638	95.7086	101.258	99.2454	98.1185	99.3999	113.229	110.476	118.154	111.176	99.9311	92.2501	113.808	96.1622	106.623
	98.9682	104.433	109.454	104.078	101.131	94.5746	104.123	116.665	104.945	111.089	93.6766	92.0638	102.958	105.506	111.111	105.41	116.922	109.617	110.668	109.96	94.8003	97.4668	89.7642	89.78	103.483	102.654	101.972	102.334	86.4051	97.6723	99.9858	87.8573	86.4648	100.105	103.638	95.7086	101.258	98.6051	97.2799	98.6047	113.229	111.326	116.168	111.176	100.671	93.3228	113.808	95.0937	105.679
	99.7237	104.433	111.063	104.849	101.131	94.5746	105.106	115.877	104.945	110.171	92.8476	93.4912	101.152	104.529	112.022	106.636	117.701	108.823	111.97	109.101	96.6118	97.4668	89.7642	89.78	103.483	102.654	101.972	102.334	86.4051	96.2966	102.763	87.8573	86.4648	100.105	102.887	95.1456	101.258	97.9648	96.4413	97.8095	112.448	111.326	115.175	110.404	101.412	94.3955	113.808	94.0253	105.679
	99.7237	105.074	111.063	104.078	101.131	94.5746	106.088	114.3	104.084	108.335	92.8476	94.2049	100.249	102.575	111.111	109.087	118.481	108.823	113.272	108.242	97.8194	97.4668	90.6443	89.78	103.483	101.355	102.952	101.32	86.4051	96.2966	103.689	87.0206	86.4648	99.2107	102.887	94.5826	101.258	97.9648	95.6027	97.0143	110.887	113.026	114.182	108.86	101.412	94.3955	112.897	91.8883	104.736
	101.235	105.074	111.063	103.307	99.8004	94.5746	107.07	113.512	103.224	107.417	92.8476	94.2049	99.3454	100.621	108.379	111.539	119.26	108.028	113.272	106.524	98.4232	96.5205	92.4043	90.6868	102.279	100.056	104.913	101.32	85.0336	95.6088	103.689	87.8573	86.4648	99.2107	102.136	94.0196	101.258	97.3245	95.6027	97.8095	109.325	114.725	114.182	108.86	102.152	94.3955	111.077	89.7514	104.736
	101.235	104.433	111.063	103.307	99.1351	94.5746	106.088	111.935	103.224	107.417	92.8476	94.9185	98.4423	99.6441	106.557	112.764	119.26	106.44	114.574	106.524	99.027	96.5205	93.2844	90.6868	101.076	98.7561	105.894	100.307	83.6621	96.2966	103.689	87.8573	86.4648	99.2107	102.887	93.4566	100.569	98.6051	95.6027	97.0143	107.763	115.575	113.189	108.86	102.892	95.4682	111.077	88.6829	104.736
	101.99	103.793	111.063	102.536	98.4698	94.5746	106.088	111.147	103.224	107.417	93.6766	94.9185	96.636	98.6672	105.646	112.764	120.04	104.057	113.272	104.805	99.027	96.5205	95.0445	90.6868	99.8728	97.4567	106.874	99.294	83.6621	95.6088	103.689	88.6941	87.5065	100.105	102.887	94.0196	99.1913	99.2454	95.6027	97.8095	106.982	114.725	113.189	110.404	102.892	96.5408	110.166	88.6829	105.679
	101.235	102.511	110.259	102.536	97.8044	95.4503	105.106	111.935	104.084	107.417	93.6766	95.6322	95.7328	98.6672	105.646	112.764	120.04	102.468	113.272	103.087	97.8194	96.5205	96.8045	90.6868	99.8728	98.7561	106.874	98.2807	83.6621	94.9209	102.763	87.8573	88.5483	100.105	102.887	94.5826	98.5025	99.2454	96.4413	97.0143	106.201	113.876	114.182	111.948	102.152	95.4682	109.256	88.6829	104.736
	100.479	101.23	109.454	103.307	98.4698	96.326	105.106	112.724	104.945	107.417	93.6766	96.3459	95.7328	100.621	105.646	113.99	118.481	101.674	110.668	100.51	96.6118	95.5742	96.8045	90.6868	98.6695	100.056	107.855	99.294	82.2906	94.2331	103.689	88.6941	90.6318	100.105	102.887	95.7086	98.5025	99.8857	95.6027	97.0143	105.42	113.026	114.182	114.264	102.152	94.3955	107.435	89.7514	104.736
	98.9682	101.23	110.259	104.078	99.1351	96.326	105.106	113.512	104.084	109.253	92.8476	96.3459	94.8297	101.598	105.646	113.99	116.922	103.262	113.272	99.651	96.0079	95.5742	96.8045	89.78	98.6695	98.7561	109.816	99.294	83.6621	94.9209	103.689	87.8573	90.6318	98.3169	102.887	96.8346	98.5025	99.8857	94.764	96.2191	105.42	110.476	114.182	115.808	102.152	94.3955	106.524	90.8199	103.792
	98.2127	101.23	111.063	104.849	99.1351	96.326	105.106	112.724	103.224	110.171	92.8476	95.6322	94.8297	102.575	104.736	112.764	116.142	107.234	109.366	98.792	95.4041	95.5742	96.8045	88.8731	98.6695	100.056	110.796	100.307	83.6621	96.2966	103.689	87.0206	90.6318	96.5294	102.887	96.8346	98.5025	100.526	94.764	95.4239	104.64	108.777	114.182	116.58	102.152	93.3228	106.524	91.8883	102.849
	98.9682	101.871	110.259	104.849	99.1351	96.326	105.106	113.512	103.224	112.007	92.8476	95.6322	95.7328	102.575	105.646	111.539	114.583	111.206	109.366	98.792	96.0079	94.628	95.9245	87.9662	98.6695	101.355	109.816	100.307	85.0336	96.2966	103.689	87.0206	91.6735	94.7418	102.136	97.9605	97.8136	101.166	95.6027	95.4239	103.859	107.927	113.189	116.58	101.412	94.3955	109.256	94.0253	102.849
	100.479	101.871	110.259	105.62	98.4698	96.326	105.106	113.512	101.504	112.007	92.0186	95.6322	97.5391	102.575	105.646	111.539	113.025	114.383	108.064	99.651	96.6118	94.628	94.1644	87.9662	98.6695	103.954	106.874	101.32	86.4051	95.6088	102.763	87.0206	92.7153	94.7418	101.385	98.5235	97.8136	101.807	97.2799	97.0143	105.42	107.077	113.189	117.352	100.671	94.3955	110.166	96.1622	102.849
	102.746	102.511	110.259	105.62	97.8044	96.326	104.123	111.935	101.504	112.007	92.0186	95.6322	99.3454	101.598	106.557	111.539	110.686	116.766	108.064	100.51	97.2156	95.5742	92.4043	87.9662	97.4662	102.654	102.952	100.307	89.1482	96.2966	102.763	87.8573	94.7987	94.7418	101.385	99.0865	97.8136	102.447	97.2799	96.2191	106.982	107.927	112.196	118.896	100.671	95.4682	111.077	96.1622	103.792
	101.99	103.152	110.259	105.62	98.4698	95.4503	104.123	111.147	101.504	112.007	92.0186	94.2049	100.249	101.598	106.557	111.539	109.127	116.766	106.762	100.51	97.2156	95.5742	92.4043	87.9662	96.2629	105.253	100.991	100.307	89.1482	96.9844	101.837	88.6941	95.8405	95.6356	102.136	99.0865	97.8136	102.447	98.1185	97.0143	108.544	108.777	110.211	121.212	99.9311	94.3955	110.166	95.0937	102.849
	101.99	103.793	111.063	105.62	98.4698	95.4503	103.141	110.359	101.504	111.089	91.1896	94.9185	102.055	102.575	106.557	112.764	106.789	117.56	109.366	99.651	97.2156	95.5742	91.5243	87.9662	96.2629	102.654	100.011	98.2807	90.5197	96.2966	99.9858	87.8573	96.8822	95.6356	102.887	99.0865	97.8136	103.087	98.1185	97.0143	107.763	108.777	109.218	121.984	99.1909	94.3955	111.077	95.0937	101.905
	101.99	104.433	110.259	104.849	99.1351	97.2017	104.123	109.571	100.644	111.089	90.3606	94.2049	103.861	104.529	106.557	113.99	105.23	117.56	109.366	98.792	96.6118	96.5205	90.6443	87.9662	96.2629	102.654	99.0303	97.2675	93.2627	96.9844	99.9858	88.6941	95.8405	94.7418	102.887	98.5235	97.8136	103.727	96.4413	97.8095	108.544	107.927	109.218	121.984	99.9311	93.3228	109.256	95.0937	100.962
	101.235	105.074	111.868	104.078	99.1351	98.0774	105.106	110.359	100.644	110.171	90.3606	93.4912	106.571	106.482	106.557	113.99	103.671	117.56	109.366	97.9329	97.2156	97.4668	90.6443	87.9662	95.0597	102.654	98.0498	96.2543	96.0057	96.2966	98.1343	87.0206	94.7987	94.7418	103.638	97.9605	98.5025	105.008	94.764	98.6047	108.544	106.227	108.225	121.984	100.671	93.3228	107.435	95.0937	100.018
	100.479	105.715	112.673	104.078	99.1351	98.0774	106.088	110.359	101.504	110.171	91.1896	93.4912	108.377	107.459	105.646	113.99	103.671	117.56	110.668	97.0738	97.2156	97.4668	90.6443	87.9662	92.6531	101.355	98.0498	96.2543	96.0057	96.9844	97.2085	87.0206	92.7153	94.7418	103.638	97.3975	98.5025	105.648	94.764	97.8095	107.763	105.377	108.225	121.984	102.152	94.3955	106.524	95.0937	100.018
	99.7237	105.074	113.478	103.307	99.8004	98.9531	106.088	110.359	101.504	109.253	92.0186	94.2049	108.377	107.459	106.557	113.99	104.45	116.766	111.97	97.0738	96.6118	97.4668	90.6443	87.9662	91.4498	100.056	98.0498	95.2411	97.3772	96.2966	96.2827	87.0206	90.6318	95.6356	102.887	96.8346	98.5025	105.648	95.6027	98.6047	107.763	103.678	108.225	121.212	102.892	95.4682	105.614	95.0937	100.018
	98.9682	105.715	113.478	103.307	99.8004	98.0774	105.106	109.571	99.7834	109.253	92.8476	93.4912	109.28	107.459	105.646	113.99	106.009	115.972	113.272	97.9329	96.6118	97.4668	91.5243	87.9662	92.6531	100.056	98.0498	95.2411	97.3772	97.6723	97.2085	87.0206	87.5065	95.6356	102.136	96.8346	98.5025	105.648	97.2799	99.3999	106.201	103.678	107.232	119.668	102.892	96.5408	103.793	96.1622	100.962
	98.9682	105.715	114.283	103.307	99.8004	96.326	104.123	107.994	98.9232	110.171	92.8476	93.4912	109.28	106.482	104.736	113.99	106.789	115.972	114.574	97.0738	95.4041	97.4668	91.5243	87.9662	95.0597	101.355	98.0498	94.2279	97.3772	97.6723	98.1343	87.0206	85.423	95.6356	102.136	97.3975	97.8136	105.648	98.9571	100.195	105.42	103.678	107.232	118.896	103.632	96.5408	102.882	95.0937	101.905
	98.2127	105.715	113.478	102.536	99.1351	96.326	104.123	107.994	98.9232	112.007	93.6766	92.7775	110.183	105.506	103.825	113.99	107.568	114.383	113.272	97.0738	94.8003	97.4668	91.5243	87.9662	97.4662	101.355	98.0498	95.2411	96.0057	98.3601	98.1343	87.0206	85.423	95.6356	101.385	97.9605	97.8136	105.008	99.7958	99.3999	104.64	102.828	107.232	118.124	103.632	94.3955	102.882	95.0937	103.792
	100.479	105.074	113.478	102.536	99.1351	96.326	103.141	107.206	99.7834	113.843	93.6766	93.4912	110.183	103.552	102.914	113.99	108.348	113.589	113.272	97.9329	94.8003	96.5205	91.5243	87.9662	97.4662	101.355	98.0498	95.2411	96.0057	97.6723	97.2085	87.0206	85.423	96.5294	102.136	98.5235	97.1248	105.008	100.634	99.3999	103.078	103.678	107.232	116.58	103.632	93.3228	101.972	95.0937	103.792
	99.7237	105.074	112.673	103.307	99.1351	97.2017	102.159	107.206	100.644	114.761	93.6766	93.4912	109.28	101.598	102.003	112.764	108.348	112	110.668	98.792	94.8003	96.5205	91.5243	88.8731	97.4662	101.355	98.0498	96.2543	96.0057	98.3601	97.2085	86.1839	84.3813	97.4231	102.136	98.5235	97.1248	106.289	100.634	99.3999	103.078	105.377	108.225	116.58	103.632	93.3228	103.793	95.0937	102.849
	98.2127	105.074	111.868	104.078	99.1351	98.0774	103.141	107.206	101.504	115.679	94.5056	93.4912	108.377	100.621	100.182	111.539	109.127	112	108.064	99.651	94.8003	97.4668	92.4043	89.78	96.2629	101.355	100.011	98.2807	96.0057	97.6723	97.2085	87.0206	84.3813	98.3169	101.385	98.5235	96.436	105.648	101.473	99.3999	102.297	107.927	109.218	117.352	102.892	91.1775	104.703	96.1622	101.905
	97.4572	105.715	110.259	104.078	99.8004	98.9531	103.141	107.206	102.364	115.679	94.5056	94.2049	107.474	100.621	100.182	111.539	109.127	111.206	108.064	99.651	96.0079	98.4131	92.4043	89.78	96.2629	101.355	100.011	99.294	96.0057	97.6723	98.1343	86.1839	85.423	98.3169	102.136	98.5235	97.1248	106.289	101.473	98.6047	103.078	108.777	110.211	117.352	102.892	90.1048	106.524	96.1622	100.962
	98.2127	105.715	109.454	104.078	99.8004	98.0774	103.141	106.418	100.644	115.679	94.5056	94.2049	105.667	101.598	100.182	110.313	108.348	112	108.064	100.51	97.2156	98.4131	92.4043	90.6868	95.0597	100.056	100.011	102.334	96.0057	97.6723	99.0601	85.3471	85.423	99.2107	102.136	98.5235	97.8136	106.289	101.473	98.6047	103.078	107.927	110.211	118.124	102.892	87.9594	107.435	96.1622	100.018
	99.7237	105.074	109.454	103.307	99.8004	98.0774	102.159	105.629	98.9232	115.679	93.6766	94.9185	104.764	101.598	100.182	110.313	106.789	111.206	109.366	101.369	97.8194	99.3594	92.4043	90.6868	95.0597	98.7561	100.011	102.334	97.3772	97.6723	99.9858	86.1839	86.4648	99.2107	100.634	98.5235	98.5025	105.648	100.634	98.6047	103.859	107.927	111.203	118.124	102.152	86.8868	108.345	96.1622	100.018
	100.479	104.433	111.063	102.536	99.8004	98.0774	101.176	105.629	98.063	115.679	94.5056	94.9185	102.958	102.575	101.093	109.087	105.23	110.411	110.668	101.369	97.8194	99.3594	93.2844	90.6868	95.0597	98.7561	99.0303	101.32	97.3772	99.0479	100.912	85.3471	86.4648	99.2107	100.634	97.9605	99.1913	105.008	99.7958	99.3999	105.42	107.077	111.203	118.896	102.152	87.9594	108.345	95.0937	100.018
	101.99	104.433	110.259	101.765	100.466	99.8288	102.159	105.629	98.063	115.679	94.5056	94.2049	102.055	101.598	102.914	109.087	105.23	109.617	109.366	100.51	97.2156	98.4131	93.2844	89.78	95.0597	100.056	100.011	102.334	97.3772	98.3601	101.837	85.3471	86.4648	99.2107	99.1325	96.8346	99.8801	104.368	99.7958	100.195	106.201	106.227	112.196	118.896	102.152	87.9594	107.435	94.0253	100.018
	103.501	103.793	109.454	100.994	101.131	99.8288	103.141	105.629	97.2028	113.843	94.5056	93.4912	101.152	101.598	103.825	110.313	106.009	107.234	109.366	99.651	96.6118	98.4131	93.2844	89.78	96.2629	98.7561	100.991	104.36	96.0057	99.0479	99.9858	86.1839	86.4648	99.2107	97.6305	95.7086	100.569	105.008	98.9571	100.99	105.42	104.528	112.196	118.896	102.892	90.1048	107.435	92.9568	100.018
	105.012	103.152	109.454	100.223	101.131	99.8288	105.106	106.418	97.2028	112.925	93.6766	93.4912	102.055	102.575	104.736	109.087	106.789	103.262	110.668	97.9329	94.8003	99.3594	93.2844	89.78	97.4662	100.056	102.952	106.386	96.0057	99.0479	98.1343	86.1839	86.4648	100.105	96.8795	94.0196	101.258	105.008	98.1185	101.785	105.42	103.678	113.189	118.896	102.892	90.1048	106.524	91.8883	100.018
	105.012	103.793	108.649	100.223	100.466	99.8288	106.088	106.418	98.063	111.089	93.6766	94.2049	102.958	103.552	105.646	109.087	106.789	100.879	109.366	97.9329	94.8003	99.3594	93.2844	89.78	97.4662	101.355	101.972	108.413	94.6342	98.3601	97.2085	86.1839	86.4648	100.105	96.8795	92.3306	101.947	105.008	98.1185	102.581	105.42	102.828	113.189	118.124	102.892	91.1775	105.614	91.8883	100.018
	105.768	103.793	107.844	100.223	99.8004	99.8288	106.088	105.629	98.063	111.089	93.6766	94.2049	103.861	105.506	104.736	109.087	106.009	98.4965	108.064	97.9329	94.8003	99.3594	93.2844	89.78	98.6695	101.355	100.991	110.439	93.2627	98.3601	96.2827	87.0206	87.5065	99.2107	96.8795	91.2046	101.947	105.648	98.1185	103.376	106.201	103.678	112.196	117.352	102.892	91.1775	105.614	91.8883	100.962
	105.012	103.793	107.844	99.4525	99.1351	98.0774	106.088	104.841	98.063	111.089	92.8476	95.6322	105.667	106.482	104.736	110.313	106.009	97.7021	108.064	99.651	94.1965	99.3594	93.2844	90.6868	97.4662	103.954	100.011	111.452	93.2627	98.3601	95.3569	87.8573	89.59	99.2107	96.8795	91.7676	101.947	106.289	98.1185	103.376	106.982	102.828	111.203	117.352	102.892	92.2501	106.524	91.8883	100.018
	105.012	103.793	107.039	99.4525	99.1351	97.2017	105.106	101.688	98.9232	112.007	92.0186	96.3459	105.667	106.482	104.736	110.313	106.009	97.7021	109.366	100.51	92.9888	98.4131	93.2844	90.6868	97.4662	103.954	100.011	113.479	93.2627	99.0479	92.5795	89.5308	90.6318	99.2107	96.8795	94.0196	101.947	106.289	98.1185	104.966	106.982	102.828	110.211	117.352	102.892	94.3955	106.524	92.9568	100.018
	105.768	104.433	108.649	99.4525	99.1351	97.2017	105.106	99.323	99.7834	111.089	92.0186	97.0596	105.667	107.459	104.736	110.313	106.009	99.2908	108.064	100.51	92.385	96.5205	94.1644	91.5937	97.4662	102.654	99.0303	114.492	93.2627	99.0479	91.6537	89.5308	92.7153	97.4231	96.8795	96.2716	101.947	106.929	98.9571	104.966	107.763	101.978	109.218	118.124	102.152	96.5408	107.435	92.9568	99.0745
	104.257	104.433	109.454	98.6815	99.8004	97.2017	105.106	98.5347	98.9232	110.171	92.0186	97.0596	106.571	107.459	104.736	111.539	106.009	100.879	108.064	100.51	92.385	96.5205	95.0445	92.5006	96.2629	102.654	99.0303	115.505	93.2627	99.7358	91.6537	89.5308	93.757	96.5294	96.8795	97.9605	102.635	106.289	99.7958	102.581	108.544	101.128	107.232	118.124	101.412	96.5408	107.435	94.0253	100.018
	105.012	104.433	108.649	98.6815	99.8004	97.2017	106.088	97.7465	99.7834	108.335	91.1896	97.7732	108.377	107.459	105.646	111.539	106.789	101.674	105.46	100.51	91.7812	96.5205	95.9245	92.5006	96.2629	103.954	98.0498	113.479	93.2627	100.424	90.7279	89.5308	93.757	96.5294	97.6305	98.5235	103.324	106.929	99.7958	100.99	108.544	100.279	106.239	118.124	101.412	98.6862	109.256	94.0253	100.018
	105.768	103.793	108.649	98.6815	99.8004	96.326	107.07	98.5347	99.7834	108.335	92.8476	97.7732	108.377	107.459	106.557	111.539	107.568	101.674	106.762	99.651	90.5735	95.5742	96.8045	91.5937	96.2629	105.253	98.0498	111.452	93.2627	99.7358	89.8021	89.5308	92.7153	96.5294	97.6305	97.9605	102.635	107.569	98.9571	98.6047	108.544	100.279	105.246	117.352	101.412	98.6862	111.077	94.0253	100.018
	105.768	103.793	108.649	98.6815	99.8004	96.326	108.053	99.323	98.9232	108.335	92.8476	97.7732	108.377	107.459	107.468	110.313	107.568	102.468	106.762	99.651	90.5735	97.4668	97.6846	91.5937	95.0597	105.253	99.0303	108.413	93.2627	99.7358	87.9505	89.5308	90.6318	97.4231	97.6305	97.9605	101.258	106.929	98.9571	98.6047	108.544	100.279	104.253	115.808	100.671	98.6862	111.987	94.0253	100.962
	107.279	103.152	109.454	98.6815	99.8004	95.4503	108.053	99.323	97.2028	108.335	92.0186	97.7732	108.377	107.459	106.557	109.087	107.568	102.468	105.46	100.51	90.5735	99.3594	98.5646	90.6868	93.8564	106.553	100.011	106.386	91.8912	100.424	87.9505	89.5308	88.5483	97.4231	97.6305	97.3975	100.569	107.569	98.9571	97.0143	107.763	101.128	104.253	115.036	99.9311	98.6862	111.987	94.0253	101.905
	107.279	103.152	109.454	97.9106	100.466	95.4503	108.053	99.323	95.4824	109.253	92.0186	97.7732	107.474	107.459	106.557	109.087	106.789	101.674	105.46	101.369	90.5735	100.306	99.4447	91.5937	92.6531	105.253	100.011	105.373	90.5197	99.7358	88.8763	89.5308	86.4648	97.4231	97.6305	97.3975	99.8801	107.569	98.9571	96.2191	107.763	101.978	104.253	115.036	99.9311	98.6862	112.897	92.9568	101.905
	105.768	103.152	109.454	97.9106	100.466	96.326	108.053	97.7465	94.6222	109.253	92.0186	98.4869	108.377	107.459	105.646	110.313	106.789	100.085	105.46	100.51	91.1773	102.198	100.325	92.5006	91.4498	105.253	100.011	104.36	89.1482	100.424	90.7279	87.8573	85.423	97.4231	99.1325	96.8346	99.8801	107.569	98.1185	95.4239	106.982	101.978	103.26	115.036	99.9311	97.6135	112.897	91.8883	101.905
	105.768	103.152	110.259	97.9106	100.466	98.0774	107.07	97.7465	93.762	110.171	92.0186	98.4869	109.28	107.459	105.646	110.313	106.789	99.2908	105.46	99.651	91.7812	102.198	99.4447	93.4074	91.4498	105.253	100.011	103.347	89.1482	100.424	91.6537	87.8573	84.3813	97.4231	100.634	96.2716	99.1913	106.289	97.2799	93.8335	106.201	102.828	103.26	115.808	99.1909	95.4682	111.077	90.8199	102.849
	103.501	103.152	111.063	97.9106	100.466	100.704	107.07	97.7465	93.762	111.089	92.0186	97.7732	110.183	107.459	104.736	111.539	106.009	99.2908	104.158	97.9329	92.9888	102.198	98.5646	93.4074	91.4498	106.553	99.0303	102.334	89.1482	99.7358	92.5795	87.0206	84.3813	98.3169	101.385	96.2716	98.5025	106.289	95.6027	91.4479	104.64	102.828	104.253	117.352	99.1909	94.3955	109.256	90.8199	102.849
	103.501	102.511	111.868	97.9106	99.8004	99.8288	107.07	98.5347	95.4824	111.089	92.0186	97.0596	108.377	107.459	104.736	111.539	105.23	99.2908	102.856	96.2148	93.5926	101.252	99.4447	93.4074	92.6531	107.852	98.0498	101.32	89.1482	99.7358	95.3569	89.5308	84.3813	99.2107	102.136	96.2716	98.5025	105.648	93.9254	89.8575	103.859	102.828	105.246	118.124	98.4507	92.2501	108.345	89.7514	101.905
	102.746	102.511	112.673	97.9106	99.8004	99.8288	107.07	99.323	96.3426	111.089	92.8476	96.3459	106.571	108.436	103.825	110.313	105.23	98.4965	102.856	93.6376	94.1965	101.252	100.325	92.5006	93.8564	109.152	98.0498	102.334	90.5197	99.0479	96.2827	90.3675	85.423	100.105	102.887	95.7086	99.1913	105.008	92.2482	88.2671	103.859	102.828	106.239	120.44	98.4507	90.1048	106.524	88.6829	101.905
	102.746	101.871	112.673	97.9106	99.8004	98.9531	107.07	100.111	97.2028	112.925	93.6766	95.6322	105.667	107.459	102.914	109.087	105.23	99.2908	102.856	91.9195	94.8003	100.306	100.325	90.6868	93.8564	110.451	100.011	103.347	89.1482	99.0479	96.2827	91.2043	84.3813	100.105	103.638	94.5826	100.569	103.727	92.2482	87.4719	104.64	102.828	108.225	121.212	98.4507	89.0321	105.614	87.6145	100.962
	103.501	101.871	113.478	97.1396	99.1351	98.0774	107.07	100.111	98.063	112.925	95.3346	94.9185	106.571	107.459	102.914	107.861	106.789	99.2908	102.856	90.2014	94.8003	100.306	99.4447	89.78	93.8564	110.451	102.952	103.347	89.1482	99.0479	96.2827	92.041	83.3396	100.105	104.389	94.0196	101.258	103.727	93.0868	88.2671	105.42	102.828	109.218	121.984	98.4507	86.8868	104.703	87.6145	100.018
	104.257	101.871	113.478	96.3687	99.8004	96.326	107.07	100.9	98.9232	113.843	95.3346	94.9185	109.28	107.459	102.914	107.861	109.127	100.085	101.554	89.3423	94.8003	100.306	99.4447	87.9662	92.6531	110.451	103.933	102.334	89.1482	99.0479	95.3569	92.041	82.2978	99.2107	105.892	94.0196	101.258	103.087	93.9254	87.4719	106.982	103.678	110.211	121.984	98.4507	85.8141	102.882	87.6145	99.0745
	104.257	103.152	113.478	96.3687	99.8004	95.4503	106.088	102.476	97.2028	113.843	95.3346	94.9185	110.183	106.482	103.825	106.636	110.686	100.085	98.9504	88.4832	95.4041	100.306	97.6846	87.9662	92.6531	109.152	105.894	102.334	89.1482	99.0479	94.4311	92.041	83.3396	98.3169	106.643	94.0196	100.569	102.447	94.764	88.2671	106.201	105.377	111.203	121.212	97.7104	84.7414	101.972	87.6145	99.0745
	106.523	103.152	114.283	97.1396	99.1351	94.5746	106.088	102.476	96.3426	112.925	94.5056	94.9185	111.086	108.436	104.736	107.861	112.245	101.674	97.6484	87.6242	95.4041	100.306	97.6846	86.1525	92.6531	109.152	106.874	102.334	89.1482	98.3601	94.4311	92.041	85.423	97.4231	105.892	95.1456	99.8801	102.447	95.6027	89.0623	107.763	106.227	111.203	119.668	98.4507	84.7414	103.793	87.6145	99.0745
	107.279	103.793	112.673	98.6815	99.8004	95.4503	105.106	103.264	95.4824	112.925	93.6766	94.9185	110.183	111.367	105.646	107.861	113.804	102.468	98.9504	86.7651	96.0079	100.306	96.8045	86.1525	93.8564	109.152	106.874	102.334	89.1482	96.9844	93.5053	92.041	86.4648	97.4231	106.643	95.7086	98.5025	101.807	97.2799	89.0623	107.763	105.377	113.189	117.352	99.1909	84.7414	103.793	87.6145	100.018
	107.279	103.793	113.478	98.6815	99.8004	96.326	105.106	104.053	94.6222	112.925	92.8476	94.9185	107.474	113.321	106.557	109.087	114.583	103.262	100.252	87.6242	95.4041	101.252	96.8045	86.1525	92.6531	106.553	107.855	102.334	87.7767	96.9844	91.6537	92.8777	87.5065	97.4231	106.643	96.2716	98.5025	101.807	98.1185	88.2671	107.763	104.528	115.175	114.264	99.9311	84.7414	105.614	86.546	100.018
	107.279	103.793	113.478	98.6815	99.1351	96.326	106.088	104.053	93.762	110.171	92.0186	94.9185	105.667	113.321	105.646	109.087	115.363	104.057	102.856	87.6242	94.8003	102.198	95.9245	87.0594	91.4498	106.553	107.855	101.32	86.4051	96.9844	91.6537	92.041	86.4648	97.4231	105.892	96.8346	99.1913	101.807	98.1185	88.2671	106.982	103.678	115.175	111.948	101.412	85.8141	105.614	86.546	100.018
	107.279	104.433	112.673	97.9106	99.1351	96.326	107.07	102.476	94.6222	110.171	91.1896	94.9185	102.958	113.321	106.557	109.087	114.583	104.057	104.158	88.4832	94.1965	102.198	95.0445	87.9662	91.4498	103.954	108.835	99.294	87.7767	98.3601	91.6537	91.2043	84.3813	97.4231	105.892	97.3975	99.8801	102.447	98.9571	89.0623	106.201	102.828	114.182	111.176	102.892	85.8141	106.524	86.546	100.018
	107.279	104.433	111.868	97.1396	99.8004	98.0774	108.053	102.476	95.4824	109.253	90.3606	94.9185	102.055	112.344	104.736	109.087	113.025	104.851	104.158	89.3423	92.385	102.198	95.0445	89.78	92.6531	102.654	108.835	97.2675	87.7767	98.3601	91.6537	89.5308	82.2978	97.4231	105.14	97.3975	99.8801	103.087	98.9571	89.8575	104.64	102.828	112.196	111.176	103.632	86.8868	107.435	86.546	100.018
	107.279	103.793	111.063	97.1396	100.466	99.8288	107.07	103.264	96.3426	109.253	89.5316	95.6322	101.152	110.39	104.736	107.861	112.245	104.851	104.158	89.3423	92.385	102.198	93.2844	89.78	95.0597	101.355	108.835	95.2411	89.1482	99.0479	92.5795	89.5308	82.2978	98.3169	104.389	97.3975	99.1913	102.447	98.9571	89.8575	105.42	102.828	110.211	111.948	104.373	89.0321	109.256	86.546	100.018
	107.279	103.152	113.478	97.1396	100.466	100.704	106.088	103.264	98.9232	108.335	89.5316	96.3459	101.152	109.413	102.914	105.41	112.245	104.057	104.158	89.3423	92.385	101.252	92.4043	90.6868	95.0597	101.355	108.835	94.2279	90.5197	99.0479	91.6537	88.6941	83.3396	98.3169	105.892	97.9605	99.8801	102.447	98.1185	90.6527	105.42	102.828	108.225	111.948	105.113	90.1048	109.256	86.546	100.018
	105.768	102.511	114.283	97.1396	99.8004	101.58	106.088	104.053	98.9232	106.498	89.5316	97.0596	101.152	109.413	102.003	102.959	112.245	104.851	102.856	88.4832	92.9888	101.252	93.2844	90.6868	97.4662	101.355	108.835	95.2411	90.5197	98.3601	90.7279	88.6941	84.3813	98.3169	106.643	97.3975	99.1913	103.087	98.1185	91.4479	107.763	102.828	106.239	111.948	105.853	91.1775	106.524	86.546	100.018
	105.012	102.511	114.283	97.9106	99.1351	103.332	105.106	104.053	98.063	105.58	89.5316	97.0596	100.249	107.459	101.093	101.733	112.245	104.851	102.856	87.6242	94.1965	100.306	93.2844	90.6868	98.6695	102.654	107.855	95.2411	91.8912	99.0479	90.7279	89.5308	85.423	98.3169	106.643	97.3975	98.5025	103.727	98.1185	91.4479	108.544	103.678	105.246	111.948	105.853	91.1775	105.614	86.546	100.018
	104.257	102.511	114.283	98.6815	98.4698	100.704	105.106	104.053	98.063	103.744	89.5316	97.0596	100.249	107.459	101.093	101.733	112.245	104.851	102.856	87.6242	95.4041	100.306	92.4043	90.6868	99.8728	100.056	105.894	95.2411	90.5197	99.0479	89.8021	88.6941	87.5065	97.4231	107.394	97.3975	97.8136	101.807	97.2799	91.4479	107.763	103.678	105.246	111.948	106.593	90.1048	104.703	86.546	100.018
	104.257	103.152	113.478	98.6815	98.4698	100.704	105.106	104.841	98.063	103.744	89.5316	96.3459	99.3454	106.482	100.182	101.733	112.245	105.645	104.158	86.7651	96.6118	100.306	91.5243	90.6868	99.8728	98.7561	105.894	96.2543	90.5197	99.0479	88.8763	87.8573	89.59	96.5294	108.145	97.9605	97.8136	101.807	97.2799	93.0383	107.763	104.528	105.246	111.176	106.593	90.1048	104.703	86.546	100.018
	104.257	103.152	112.673	99.4525	99.1351	100.704	107.07	105.629	97.2028	105.58	90.3606	96.3459	98.4423	106.482	100.182	102.959	112.245	106.44	101.554	86.7651	96.6118	101.252	91.5243	90.6868	99.8728	97.4567	105.894	97.2675	89.1482	97.6723	88.8763	87.0206	90.6318	93.848	107.394	97.9605	98.5025	101.807	97.2799	92.2431	108.544	106.227	106.239	111.176	106.593	90.1048	103.793	86.546	99.0745
	104.257	102.511	111.868	99.4525	100.466	101.58	107.07	105.629	97.2028	106.498	90.3606	97.7732	99.3454	106.482	101.093	105.41	111.466	108.823	101.554	86.7651	96.6118	101.252	91.5243	90.6868	102.279	98.7561	106.874	96.2543	89.1482	98.3601	88.8763	86.1839	90.6318	92.9542	106.643	97.9605	99.1913	101.807	98.1185	93.0383	109.325	107.077	106.239	110.404	105.853	90.1048	101.972	86.546	98.1309
	105.012	102.511	111.868	99.4525	101.131	102.456	105.106	105.629	98.063	107.417	91.1896	97.7732	99.3454	105.506	101.093	104.184	109.907	109.617	98.9504	87.6242	96.0079	101.252	90.6443	90.6868	103.483	98.7561	107.855	96.2543	89.1482	97.6723	88.8763	86.1839	90.6318	92.9542	104.389	98.5235	99.1913	102.447	97.2799	95.4239	109.325	107.927	106.239	111.176	105.113	89.0321	101.972	86.546	98.1309
	105.768	102.511	111.063	100.223	101.131	104.207	103.141	104.841	98.9232	108.335	91.1896	98.4869	100.249	106.482	102.003	102.959	106.789	109.617	100.252	88.4832	96.0079	101.252	89.7642	89.78	104.686	100.056	107.855	96.2543	90.5197	97.6723	88.8763	86.1839	89.59	92.9542	102.887	98.5235	98.5025	101.807	97.2799	98.6047	109.325	107.927	105.246	111.176	104.373	89.0321	101.061	87.6145	98.1309
	105.768	103.152	110.259	100.223	100.466	104.207	102.159	104.841	98.9232	110.171	90.3606	98.4869	99.3454	108.436	102.003	100.507	104.45	109.617	98.9504	89.3423	96.6118	100.306	89.7642	90.6868	105.889	100.056	107.855	96.2543	91.8912	98.3601	87.9505	85.3471	89.59	93.848	102.887	99.0865	97.8136	101.807	97.2799	99.3999	107.763	107.077	104.253	110.404	104.373	87.9594	99.2405	88.6829	98.1309
	105.768	103.793	110.259	99.4525	99.8004	102.456	102.159	105.629	98.9232	111.089	89.5316	99.2006	99.3454	110.39	102.003	100.507	102.891	108.823	97.6484	89.3423	97.2156	100.306	88.8842	91.5937	105.889	100.056	107.855	95.2411	94.6342	97.6723	89.8021	84.5104	88.5483	94.7418	102.136	99.0865	97.1248	102.447	97.2799	100.99	106.982	105.377	103.26	108.86	103.632	87.9594	98.33	89.7514	98.1309
	105.768	103.793	109.454	98.6815	99.8004	101.58	103.141	106.418	98.063	112.007	88.7026	99.9142	98.4423	110.39	101.093	101.733	102.891	107.234	98.9504	89.3423	96.6118	99.3594	89.7642	92.5006	107.093	101.355	109.816	95.2411	94.6342	97.6723	91.6537	83.6736	88.5483	94.7418	102.136	97.9605	96.436	102.447	96.4413	101.785	106.201	105.377	102.267	108.087	102.892	87.9594	98.33	90.8199	98.1309
	104.257	103.793	109.454	98.6815	100.466	100.704	104.123	106.418	99.7834	111.089	88.7026	100.628	97.5391	108.436	101.093	102.959	102.891	104.851	98.9504	90.2014	95.4041	99.3594	90.6443	93.4074	108.296	102.654	109.816	95.2411	94.6342	99.0479	94.4311	83.6736	87.5065	95.6356	102.136	97.9605	96.436	102.447	95.6027	102.581	106.201	104.528	101.275	107.315	102.892	89.0321	100.151	91.8883	98.1309
	103.501	103.793	109.454	99.4525	100.466	100.704	103.141	104.841	99.7834	110.171	87.8736	101.342	98.4423	106.482	101.093	102.959	103.671	103.262	100.252	91.0604	94.1965	99.3594	90.6443	93.4074	108.296	103.954	108.835	95.2411	94.6342	98.3601	96.2827	84.5104	86.4648	94.7418	102.136	97.9605	96.436	101.807	95.6027	103.376	106.201	104.528	101.275	108.087	102.152	89.0321	102.882	92.9568	98.1309
	101.235	103.793	108.649	100.223	100.466	100.704	103.141	104.841	98.9232	109.253	87.8736	101.342	98.4423	104.529	102.003	102.959	103.671	102.468	100.252	91.9195	93.5926	100.306	89.7642	93.4074	108.296	106.553	108.835	95.2411	94.6342	97.6723	98.1343	85.3471	85.423	93.848	102.136	97.3975	97.1248	100.526	94.764	103.376	106.982	104.528	101.275	108.86	102.892	90.1048	105.614	94.0253	98.1309
	101.235	104.433	109.454	100.223	100.466	99.8288	103.141	104.053	98.063	108.335	87.0446	101.342	99.3454	103.552	101.093	102.959	102.891	102.468	102.856	92.7785	93.5926	102.198	89.7642	93.4074	108.296	107.852	106.874	96.2543	94.6342	99.0479	98.1343	87.0206	84.3813	93.848	102.136	96.8346	97.1248	99.8857	96.4413	103.376	106.982	103.678	100.282	110.404	103.632	90.1048	106.524	95.0937	98.1309
	101.235	104.433	108.649	100.223	101.131	99.8288	102.159	103.264	98.063	108.335	87.8736	101.342	100.249	103.552	102.003	102.959	104.45	101.674	101.554	93.6376	94.1965	104.091	89.7642	92.5006	108.296	109.152	105.894	96.2543	93.2627	98.3601	99.0601	86.1839	85.423	93.848	101.385	96.8346	97.1248	97.9648	96.4413	101.785	106.982	103.678	100.282	112.72	104.373	91.1775	105.614	97.2307	99.0745
	102.746	105.074	108.649	100.223	101.131	99.8288	101.176	102.476	94.6222	109.253	87.8736	101.342	101.152	101.598	101.093	102.959	106.009	100.879	101.554	94.4967	94.8003	105.037	88.8842	92.5006	107.093	110.451	103.933	96.2543	93.2627	98.3601	100.912	86.1839	87.5065	94.7418	101.385	96.2716	97.1248	96.6842	94.764	101.785	106.201	104.528	100.282	115.036	105.113	92.2501	106.524	97.2307	99.0745
	105.012	104.433	108.649	99.4525	101.796	99.8288	99.2119	103.264	91.1814	110.171	88.7026	100.628	101.152	100.621	102.003	104.184	106.009	100.879	100.252	93.6376	94.8003	105.037	88.8842	91.5937	105.889	109.152	100.011	96.2543	91.8912	98.3601	101.837	84.5104	88.5483	95.6356	102.887	95.7086	97.1248	96.0439	93.9254	100.99	106.982	104.528	99.2888	117.352	105.113	92.2501	107.435	97.2307	99.0745
	106.523	105.074	110.259	98.6815	101.796	98.9531	98.2296	103.264	88.6008	111.089	89.5316	100.628	102.055	100.621	103.825	104.184	106.789	100.879	100.252	92.7785	94.1965	104.091	88.8842	90.6868	104.686	110.451	97.0693	96.2543	93.2627	98.3601	102.763	83.6736	88.5483	96.5294	102.887	95.1456	97.1248	95.4036	92.2482	100.195	106.982	104.528	99.2888	118.124	105.853	93.3228	107.435	98.2992	100.018
	107.279	105.715	111.063	98.6815	101.796	99.8288	99.2119	104.053	86.8804	111.089	89.5316	101.342	101.152	100.621	103.825	105.41	107.568	101.674	100.252	91.9195	93.5926	102.198	89.7642	90.6868	104.686	110.451	95.1083	95.2411	93.2627	98.3601	102.763	82.8369	89.59	96.5294	102.887	94.5826	95.7472	94.7633	90.5709	99.3999	107.763	104.528	99.2888	117.352	106.593	94.3955	108.345	97.2307	100.018
	107.279	106.356	111.868	97.9106	101.796	98.9531	100.194	104.053	86.8804	111.089	87.8736	100.628	101.152	102.575	104.736	105.41	108.348	103.262	100.252	91.9195	92.9888	102.198	90.6443	91.5937	104.686	109.152	94.1278	96.2543	94.6342	99.7358	101.837	82.8369	90.6318	96.5294	101.385	95.7086	95.0583	94.7633	90.5709	99.3999	108.544	105.377	99.2888	116.58	106.593	94.3955	109.256	96.1622	100.018
	108.034	106.996	113.478	97.9106	101.796	100.704	102.159	102.476	88.6008	112.007	87.8736	101.342	101.152	103.552	106.557	105.41	109.127	104.057	98.9504	92.7785	93.5926	101.252	90.6443	91.5937	105.889	106.553	93.1473	97.2675	94.6342	99.7358	101.837	83.6736	90.6318	96.5294	99.8835	96.2716	94.3695	94.123	89.7323	97.8095	108.544	106.227	99.2888	115.036	105.853	94.3955	109.256	95.0937	100.018
	108.034	106.996	113.478	97.1396	101.796	100.704	103.141	101.688	91.1814	112.925	87.8736	100.628	100.249	103.552	105.646	106.636	108.348	103.262	97.6484	94.4967	93.5926	100.306	91.5243	92.5006	104.686	106.553	94.1278	97.2675	94.6342	99.7358	100.912	84.5104	89.59	96.5294	98.3815	96.2716	94.3695	94.123	89.7323	97.8095	107.763	106.227	100.282	115.808	105.113	95.4682	109.256	94.0253	100.962
	107.279	106.356	114.283	97.9106	101.796	101.58	104.123	100.9	93.762	113.843	87.8736	99.9142	100.249	104.529	104.736	107.861	108.348	102.468	98.9504	96.2148	93.5926	101.252	91.5243	92.5006	103.483	106.553	95.1083	98.2807	94.6342	100.424	100.912	83.6736	88.5483	96.5294	97.6305	96.2716	93.6807	94.7633	90.5709	98.6047	106.982	106.227	102.267	117.352	104.373	95.4682	108.345	94.0253	100.962
	108.034	105.715	112.673	98.6815	101.796	101.58	106.088	100.111	96.3426	114.761	87.8736	99.2006	99.3454	102.575	103.825	109.087	108.348	101.674	100.252	95.3557	93.5926	102.198	91.5243	92.5006	102.279	105.253	96.0888	98.2807	94.6342	100.424	100.912	84.5104	88.5483	96.5294	96.8795	96.8346	93.6807	95.4036	91.4096	98.6047	107.763	107.927	103.26	118.124	102.892	93.3228	105.614	94.0253	100.962
	108.034	105.715	111.868	98.6815	101.796	101.58	108.053	100.111	97.2028	114.761	88.7026	98.4869	98.4423	102.575	102.003	111.539	107.568	101.674	101.554	95.3557	92.9888	102.198	91.5243	92.5006	102.279	105.253	98.0498	98.2807	94.6342	100.424	99.0601	84.5104	88.5483	96.5294	96.8795	96.8346	93.6807	95.4036	92.2482	98.6047	107.763	107.927	104.253	119.668	102.152	94.3955	105.614	94.0253	100.962
	107.279	105.715	111.868	97.9106	101.131	100.704	109.035	100.111	96.3426	113.843	88.7026	99.2006	98.4423	101.598	102.914	113.99	106.789	100.879	101.554	94.4967	92.9888	102.198	91.5243	93.4074	102.279	105.253	99.0303	98.2807	93.2627	99.7358	98.1343	85.3471	89.59	97.4231	96.8795	96.8346	93.6807	96.0439	93.0868	99.3999	107.763	107.927	105.246	120.44	101.412	93.3228	103.793	92.9568	100.962
	107.279	105.715	111.868	97.9106	101.131	99.8288	109.035	100.111	97.2028	112.925	87.8736	99.9142	97.5391	101.598	102.914	117.667	106.009	100.879	100.252	96.2148	92.9888	102.198	91.5243	93.4074	102.279	103.954	99.0303	97.2675	93.2627	99.7358	97.2085	83.6736	89.59	97.4231	96.1285	95.7086	94.3695	96.6842	95.6027	98.6047	108.544	109.627	105.246	121.212	100.671	95.4682	104.703	92.9568	100.962
	106.523	105.715	111.063	97.9106	100.466	98.0774	108.053	100.9	97.2028	112.925	87.8736	99.2006	97.5391	100.621	104.736	118.893	104.45	101.674	100.252	97.9329	92.385	103.144	91.5243	93.4074	101.076	103.954	98.0498	96.2543	94.6342	99.0479	96.2827	82.8369	89.59	97.4231	96.8795	94.5826	94.3695	97.3245	96.4413	97.8095	107.763	109.627	106.239	121.984	100.671	95.4682	103.793	91.8883	101.905
	106.523	105.715	111.868	97.1396	100.466	96.326	108.053	100.9	96.3426	112.007	87.8736	99.2006	98.4423	99.6441	105.646	120.118	102.891	100.879	101.554	99.651	91.7812	103.144	92.4043	94.3143	101.076	103.954	96.0888	96.2543	94.6342	99.7358	95.3569	82.8369	89.59	98.3169	96.1285	94.0196	94.3695	97.3245	96.4413	95.4239	107.763	111.326	106.239	121.984	100.671	95.4682	102.882	91.8883	102.849
	106.523	105.715	112.673	97.1396	100.466	95.4503	108.053	100.9	95.4824	113.843	87.8736	98.4869	98.4423	98.6672	106.557	120.118	101.332	101.674	101.554	100.51	90.5735	104.091	93.2844	93.4074	101.076	102.654	95.1083	96.2543	96.0057	99.7358	94.4311	82.0002	89.59	97.4231	96.1285	94.5826	94.3695	97.9648	95.6027	94.6287	106.982	112.176	106.239	121.984	100.671	97.6135	103.793	90.8199	102.849
	107.279	105.715	111.868	96.3687	100.466	96.326	106.088	100.9	95.4824	114.761	87.8736	97.7732	98.4423	98.6672	108.379	120.118	99.7734	101.674	101.554	100.51	90.5735	105.983	94.1644	93.4074	101.076	100.056	94.1278	95.2411	94.6342	97.6723	95.3569	81.1634	89.59	97.4231	95.3775	94.0196	95.0583	97.9648	94.764	93.8335	105.42	111.326	106.239	121.984	100.671	98.6862	103.793	89.7514	101.905
	107.279	105.715	110.259	96.3687	100.466	97.2017	105.106	100.9	95.4824	116.597	87.8736	97.7732	97.5391	99.6441	108.379	120.118	99.7734	101.674	100.252	99.651	89.9697	105.983	95.9245	93.4074	102.279	98.7561	95.1083	96.2543	96.0057	98.3601	94.4311	82.0002	90.6318	98.3169	95.3775	93.4566	95.7472	97.9648	94.764	93.8335	104.64	109.627	106.239	121.212	101.412	99.7589	104.703	88.6829	100.018
	107.279	104.433	109.454	97.1396	100.466	96.326	104.123	100.9	95.4824	116.597	87.8736	97.7732	96.636	100.621	106.557	120.118	98.9939	101.674	98.9504	98.792	88.762	106.93	95.9245	93.4074	103.483	97.4567	96.0888	96.2543	96.0057	99.0479	94.4311	82.0002	91.6735	99.2107	95.3775	92.8936	96.436	97.9648	93.9254	93.0383	103.078	108.777	107.232	120.44	102.152	98.6862	104.703	89.7514	99.0745
	108.034	105.074	109.454	97.9106	100.466	95.4503	103.141	100.9	96.3426	116.597	87.8736	97.0596	95.7328	100.621	104.736	121.344	98.9939	102.468	98.9504	97.0738	88.762	105.037	95.0445	94.3143	105.889	96.1573	98.0498	96.2543	96.0057	98.3601	94.4311	83.6736	92.7153	98.3169	94.6264	91.7676	96.436	98.6051	93.0868	93.0383	103.859	107.927	106.239	119.668	102.892	97.6135	106.524	90.8199	100.018
	108.034	105.715	110.259	99.4525	99.8004	95.4503	102.159	101.688	97.2028	116.597	88.7026	97.0596	96.636	100.621	104.736	120.118	98.9939	101.674	97.6484	96.2148	88.762	104.091	95.0445	94.3143	107.093	94.8579	99.0303	96.2543	96.0057	98.3601	93.5053	85.3471	91.6735	97.4231	94.6264	91.7676	97.1248	99.2454	92.2482	93.0383	103.859	106.227	105.246	119.668	102.892	96.5408	105.614	91.8883	100.962
	108.034	105.715	111.868	99.4525	99.8004	94.5746	102.159	103.264	97.2028	114.761	88.7026	97.0596	97.5391	100.621	103.825	120.118	98.9939	101.674	100.252	96.2148	88.762	101.252	93.2844	95.2212	107.093	94.8579	99.0303	97.2675	93.2627	99.0479	92.5795	87.0206	90.6318	94.7418	94.6264	92.3306	97.1248	99.2454	91.4096	93.0383	103.859	106.227	104.253	119.668	103.632	95.4682	105.614	92.9568	100.962
	107.279	105.074	111.868	100.223	100.466	95.4503	102.159	104.053	98.063	113.843	88.7026	97.7732	98.4423	100.621	104.736	120.118	99.7734	102.468	100.252	95.3557	89.3659	100.306	92.4043	96.128	105.889	94.8579	100.011	97.2675	93.2627	100.424	93.5053	87.0206	91.6735	91.1666	94.6264	92.8936	95.7472	99.8857	91.4096	93.0383	103.859	106.227	103.26	118.896	103.632	93.3228	103.793	91.8883	100.018
	108.034	105.715	112.673	100.223	100.466	96.326	101.176	104.841	98.9232	112.925	89.5316	98.4869	98.4423	99.6441	105.646	120.118	101.332	102.468	98.9504	96.2148	89.3659	100.306	92.4043	96.128	104.686	94.8579	100.011	98.2807	91.8912	100.424	93.5053	87.0206	91.6735	89.379	94.6264	93.4566	95.7472	101.166	91.4096	93.8335	104.64	107.077	104.253	118.124	103.632	91.1775	103.793	91.8883	99.0745
	108.789	106.356	111.063	100.223	100.466	95.4503	102.159	105.629	98.9232	112.925	89.5316	97.7732	99.3454	99.6441	105.646	123.796	102.112	102.468	98.9504	96.2148	89.9697	100.306	92.4043	97.0349	102.279	94.8579	98.0498	99.294	93.2627	100.424	93.5053	87.8573	93.757	86.6977	94.6264	94.0196	94.3695	101.166	93.0868	93.8335	104.64	107.927	102.267	116.58	104.373	89.0321	103.793	90.8199	98.1309
	108.034	105.715	109.454	100.223	100.466	95.4503	103.141	106.418	98.9232	112.925	89.5316	99.2006	99.3454	99.6441	102.914	128.698	102.112	101.674	100.252	96.2148	88.762	100.306	92.4043	97.0349	102.279	96.1573	96.0888	99.294	93.2627	101.799	93.5053	86.1839	94.7987	85.8039	96.1285	94.0196	93.6807	100.526	93.0868	93.8335	106.982	107.927	101.275	115.036	105.113	87.9594	104.703	91.8883	97.1873
	107.279	105.074	107.844	100.994	99.8004	95.4503	104.123	106.418	97.2028	111.089	89.5316	99.2006	100.249	99.6441	102.003	129.924	102.891	100.085	101.554	96.2148	88.762	100.306	92.4043	97.0349	101.076	96.1573	95.1083	98.2807	93.2627	102.487	94.4311	87.0206	94.7987	85.8039	95.3775	94.0196	93.6807	100.526	93.9254	94.6287	107.763	106.227	99.2888	114.264	105.113	87.9594	105.614	91.8883	98.1309
	106.523	104.433	107.844	100.223	99.8004	96.326	103.141	107.206	97.2028	111.089	90.3606	99.2006	100.249	101.598	102.914	131.15	103.671	99.2908	102.856	97.0738	88.1582	99.3594	93.2844	97.0349	99.8728	96.1573	95.1083	98.2807	93.2627	102.487	95.3569	87.8573	93.757	84.9101	95.3775	94.0196	93.6807	101.166	93.9254	93.0383	108.544	106.227	98.2959	112.72	105.853	89.0321	105.614	91.8883	99.0745
	105.768	103.793	106.235	98.6815	100.466	95.4503	102.159	107.994	97.2028	111.089	91.1896	99.2006	99.3454	102.575	102.914	131.15	103.671	98.4965	105.46	97.0738	88.1582	99.3594	92.4043	96.128	99.8728	96.1573	95.1083	99.294	94.6342	102.487	96.2827	87.8573	92.7153	85.8039	93.8754	94.5826	93.6807	101.166	94.764	93.0383	107.763	105.377	97.303	111.948	105.113	90.1048	104.703	90.8199	100.018
	105.768	103.793	107.039	98.6815	100.466	95.4503	102.159	107.206	96.3426	111.089	92.0186	98.4869	99.3454	103.552	104.736	128.698	104.45	99.2908	106.762	97.0738	88.1582	99.3594	92.4043	95.2212	101.076	96.1573	96.0888	100.307	96.0057	102.487	96.2827	87.8573	91.6735	86.6977	94.6264	95.1456	93.6807	100.526	94.764	92.2431	108.544	106.227	97.303	112.72	103.632	92.2501	104.703	89.7514	99.0745
	105.012	103.793	107.844	97.9106	101.131	95.4503	103.141	107.206	96.3426	111.089	91.1896	98.4869	98.4423	105.506	105.646	127.473	103.671	100.085	106.762	97.9329	87.5544	98.4131	93.2844	95.2212	99.8728	96.1573	97.0693	100.307	98.7487	102.487	97.2085	87.8573	90.6318	86.6977	93.8754	95.1456	95.0583	100.526	95.6027	91.4479	108.544	107.077	98.2959	114.264	102.892	93.3228	104.703	88.6829	98.1309
	105.768	104.433	108.649	97.9106	101.796	95.4503	104.123	107.994	96.3426	110.171	91.1896	98.4869	97.5391	106.482	106.557	126.247	103.671	100.085	106.762	98.792	86.9506	99.3594	94.1644	95.2212	98.6695	97.4567	98.0498	100.307	97.3772	102.487	97.2085	87.8573	89.59	87.5915	94.6264	94.5826	96.436	99.8857	95.6027	92.2431	108.544	108.777	98.2959	115.808	102.152	92.2501	105.614	87.6145	98.1309
	104.257	105.074	107.844	97.9106	102.462	95.4503	103.141	107.994	95.4824	110.171	91.1896	98.4869	96.636	107.459	106.557	125.021	104.45	100.879	104.158	99.651	86.9506	99.3594	95.0445	94.3143	98.6695	97.4567	100.991	99.294	97.3772	102.487	96.2827	87.8573	88.5483	87.5915	95.3775	94.5826	97.1248	101.166	95.6027	92.2431	110.106	109.627	99.2888	116.58	101.412	91.1775	106.524	87.6145	97.1873
	104.257	105.074	109.454	99.4525	102.462	96.326	104.123	107.206	95.4824	109.253	91.1896	98.4869	95.7328	108.436	106.557	123.796	105.23	101.674	101.554	99.651	87.5544	99.3594	94.1644	94.3143	98.6695	97.4567	102.952	99.294	97.3772	101.799	96.2827	87.0206	88.5483	88.4852	94.6264	94.0196	97.1248	101.166	97.2799	92.2431	111.668	111.326	99.2888	117.352	100.671	91.1775	108.345	87.6145	97.1873
	104.257	105.715	108.649	99.4525	102.462	95.4503	105.106	104.841	95.4824	110.171	92.0186	97.7732	94.8297	109.413	107.468	122.57	106.009	102.468	101.554	99.651	88.1582	100.306	95.9245	94.3143	98.6695	98.7561	105.894	99.294	98.7487	101.111	95.3569	86.1839	89.59	87.5915	95.3775	93.4566	97.1248	101.166	95.6027	92.2431	110.887	111.326	100.282	117.352	99.9311	91.1775	108.345	87.6145	97.1873
	103.501	105.715	108.649	100.223	101.796	95.4503	104.123	102.476	96.3426	110.171	92.0186	97.0596	94.8297	110.39	108.379	123.796	106.009	103.262	101.554	99.651	89.3659	101.252	95.9245	95.2212	98.6695	98.7561	107.855	100.307	98.7487	101.799	95.3569	85.3471	90.6318	86.6977	94.6264	93.4566	95.7472	100.526	94.764	91.4479	110.887	111.326	100.282	116.58	100.671	92.2501	108.345	88.6829	97.1873
	105.012	106.996	110.259	100.223	101.796	94.5746	105.106	100.111	97.2028	110.171	92.0186	97.0596	94.8297	111.367	108.379	123.796	105.23	102.468	98.9504	100.51	89.9697	102.198	98.5646	97.0349	99.8728	100.056	108.835	100.307	98.7487	102.487	95.3569	85.3471	90.6318	87.5915	95.3775	92.8936	95.0583	100.526	93.9254	91.4479	111.668	108.777	101.275	115.036	100.671	93.3228	109.256	87.6145	96.2438
	104.257	108.278	111.868	99.4525	102.462	92.8232	105.106	98.5347	98.9232	109.253	92.8476	97.7732	94.8297	111.367	108.379	122.57	104.45	100.879	98.9504	100.51	90.5735	103.144	100.325	98.8486	99.8728	101.355	107.855	100.307	97.3772	101.111	95.3569	85.3471	91.6735	88.4852	95.3775	93.4566	95.0583	99.8857	93.0868	90.6527	111.668	107.077	101.275	114.264	101.412	94.3955	111.077	86.546	96.2438
	105.012	108.918	112.673	99.4525	103.127	92.8232	106.088	96.9582	98.063	109.253	93.6766	98.4869	95.7328	108.436	109.289	120.118	104.45	100.085	97.6484	101.369	91.1773	103.144	101.205	99.7555	98.6695	102.654	106.874	99.294	96.0057	101.799	95.3569	85.3471	92.7153	90.2728	96.1285	94.5826	95.0583	99.8857	93.0868	90.6527	111.668	106.227	100.282	114.264	101.412	94.3955	111.077	86.546	96.2438
	105.012	108.918	112.673	100.223	103.127	93.6989	105.106	96.1699	98.063	109.253	92.8476	99.2006	96.636	107.459	109.289	117.667	103.671	99.2908	95.0445	101.369	91.7812	102.198	102.965	102.476	98.6695	103.954	104.913	97.2675	94.6342	101.111	96.2827	86.1839	92.7153	90.2728	96.8795	94.5826	95.0583	99.2454	92.2482	90.6527	111.668	104.528	99.2888	115.036	101.412	93.3228	111.077	85.4775	96.2438
	105.012	108.918	113.478	100.994	103.127	93.6989	104.123	96.1699	98.063	109.253	92.0186	99.2006	94.8297	107.459	110.2	115.216	103.671	99.2908	93.7425	102.228	91.7812	102.198	104.725	104.29	99.8728	103.954	103.933	98.2807	94.6342	101.111	94.4311	85.3471	92.7153	90.2728	96.8795	94.5826	95.0583	98.6051	91.4096	89.8575	112.448	104.528	97.303	116.58	100.671	92.2501	110.166	85.4775	96.2438
	106.523	108.918	113.478	101.765	102.462	95.4503	103.141	95.3816	98.063	109.253	92.0186	99.2006	94.8297	109.413	111.111	112.764	103.671	99.2908	92.4405	103.946	91.1773	101.252	106.485	105.197	98.6695	105.253	103.933	99.294	93.2627	100.424	93.5053	84.5104	93.757	91.1666	96.8795	94.0196	95.7472	97.9648	90.5709	90.6527	113.229	104.528	95.3172	118.124	99.9311	92.2501	111.987	85.4775	96.2438
	105.012	107.637	113.478	103.307	102.462	96.326	102.159	95.3816	98.9232	110.171	92.0186	99.2006	95.7328	110.39	111.111	111.539	103.671	99.2908	91.1385	106.524	90.5735	100.306	107.365	106.104	98.6695	106.553	104.913	101.32	90.5197	99.7358	93.5053	83.6736	93.757	92.0604	96.1285	92.8936	95.0583	97.3245	90.5709	89.8575	113.229	104.528	94.3243	118.124	99.9311	93.3228	111.987	85.4775	96.2438
	105.012	106.996	112.673	104.078	101.796	98.0774	102.159	94.5933	99.7834	110.171	92.0186	98.4869	96.636	110.39	111.111	112.764	104.45	99.2908	93.7425	109.101	89.9697	100.306	107.365	106.104	99.8728	106.553	103.933	103.347	89.1482	99.0479	93.5053	84.5104	93.757	92.0604	96.8795	92.3306	95.0583	97.9648	90.5709	89.0623	113.229	104.528	93.3315	117.352	99.9311	93.3228	112.897	85.4775	96.2438
	105.768	106.356	113.478	105.62	101.796	96.326	103.141	94.5933	98.9232	110.171	92.8476	98.4869	97.5391	110.39	110.2	113.99	104.45	99.2908	96.3465	110.819	89.9697	100.306	107.365	105.197	101.076	106.553	104.913	103.347	90.5197	99.7358	95.3569	85.3471	93.757	92.9542	97.6305	92.8936	94.3695	96.6842	90.5709	89.0623	113.229	104.528	93.3315	116.58	101.412	92.2501	112.897	85.4775	97.1873
	105.768	106.356	113.478	106.391	101.796	96.326	103.141	94.5933	98.063	109.253	93.6766	97.7732	97.5391	109.413	110.2	116.441	102.112	99.2908	97.6484	110.819	89.3659	101.252	107.365	105.197	101.076	105.253	105.894	104.36	90.5197	99.7358	95.3569	86.1839	93.757	93.848	97.6305	94.5826	92.9918	96.0439	90.5709	88.2671	112.448	104.528	94.3243	116.58	102.892	91.1775	113.808	85.4775	98.1309
	105.768	106.356	112.673	105.62	101.796	96.326	102.159	94.5933	98.063	108.335	93.6766	97.7732	96.636	109.413	109.289	120.118	101.332	100.085	96.3465	109.96	88.762	102.198	106.485	104.29	101.076	105.253	106.874	105.373	91.8912	99.7358	96.2827	86.1839	92.7153	94.7418	97.6305	95.7086	92.303	95.4036	90.5709	88.2671	112.448	103.678	95.3172	117.352	104.373	90.1048	115.629	85.4775	99.0745
	105.768	105.715	111.063	105.62	102.462	97.2017	102.159	94.5933	98.063	109.253	93.6766	97.7732	95.7328	111.367	108.379	121.344	100.553	99.2908	95.0445	107.383	88.762	102.198	103.845	102.476	101.076	105.253	105.894	105.373	93.2627	99.0479	96.2827	87.0206	92.7153	93.848	97.6305	96.2716	91.6142	95.4036	90.5709	87.4719	111.668	104.528	96.3101	117.352	105.853	90.1048	116.539	86.546	99.0745
	105.012	105.715	111.868	104.849	102.462	98.0774	102.159	95.3816	98.9232	110.171	94.5056	97.0596	94.8297	111.367	107.468	120.118	99.7734	98.4965	93.7425	103.946	88.762	103.144	103.845	101.569	101.076	105.253	107.855	106.386	94.6342	97.6723	95.3569	86.1839	92.7153	93.848	98.3815	96.8346	92.303	95.4036	90.5709	86.6767	111.668	104.528	98.2959	117.352	105.853	90.1048	117.45	87.6145	99.0745
	104.257	106.356	111.868	103.307	102.462	97.2017	102.159	96.9582	99.7834	109.253	95.3346	96.3459	93.9266	111.367	107.468	118.893	99.7734	97.7021	95.0445	100.51	89.3659	103.144	102.965	99.7555	101.076	103.954	107.855	106.386	97.3772	97.6723	94.4311	86.1839	91.6735	92.9542	97.6305	96.8346	92.9918	95.4036	90.5709	86.6767	111.668	104.528	99.2888	116.58	107.333	91.1775	116.539	88.6829	98.1309
	104.257	106.356	112.673	103.307	102.462	98.0774	102.159	97.7465	100.644	109.253	95.3346	95.6322	93.0234	111.367	109.289	115.216	99.7734	97.7021	95.0445	97.9329	89.9697	104.091	102.085	97.9418	99.8728	102.654	107.855	106.386	97.3772	97.6723	95.3569	87.0206	91.6735	93.848	96.8795	96.2716	93.6807	96.0439	91.4096	87.4719	112.448	105.377	98.2959	115.808	107.333	92.2501	116.539	89.7514	98.1309
	103.501	106.356	113.478	102.536	103.127	98.9531	102.159	97.7465	100.644	109.253	95.3346	95.6322	93.0234	110.39	110.2	112.764	99.7734	99.2908	97.6484	97.0738	89.9697	104.091	101.205	97.0349	98.6695	101.355	106.874	105.373	97.3772	97.6723	94.4311	87.8573	90.6318	94.7418	96.1285	96.8346	94.3695	96.6842	89.7323	86.6767	113.229	105.377	99.2888	115.036	108.074	93.3228	114.718	91.8883	98.1309
	103.501	106.356	114.283	102.536	103.127	98.9531	102.159	97.7465	98.9232	109.253	94.5056	94.9185	93.9266	110.39	110.2	109.087	98.9939	100.879	100.252	97.0738	90.5735	103.144	100.325	96.128	98.6695	101.355	107.855	105.373	97.3772	99.0479	95.3569	89.5308	89.59	94.7418	93.8754	96.8346	95.7472	96.6842	91.4096	87.4719	114.01	106.227	99.2888	115.036	108.074	93.3228	112.897	92.9568	98.1309
	103.501	105.074	113.478	102.536	103.127	98.0774	102.159	96.9582	99.7834	108.335	94.5056	94.2049	93.9266	111.367	111.111	105.41	98.9939	100.085	101.554	97.0738	91.1773	102.198	101.205	96.128	98.6695	101.355	107.855	104.36	96.0057	99.0479	93.5053	90.3675	89.59	95.6356	93.8754	96.8346	95.7472	96.6842	92.2482	87.4719	114.01	107.927	99.2888	115.808	108.074	94.3955	111.077	94.0253	98.1309
	104.257	104.433	111.063	102.536	103.127	98.0774	102.159	96.9582	99.7834	109.253	94.5056	94.2049	93.9266	111.367	111.111	101.733	98.9939	100.879	102.856	97.0738	91.7812	101.252	101.205	97.0349	99.8728	102.654	107.855	104.36	97.3772	99.7358	93.5053	90.3675	89.59	95.6356	94.6264	96.2716	95.7472	96.0439	91.4096	86.6767	114.791	107.927	100.282	116.58	108.814	94.3955	108.345	94.0253	98.1309
	105.012	103.793	109.454	102.536	103.127	98.0774	101.176	96.9582	99.7834	110.171	93.6766	94.2049	95.7328	111.367	111.111	100.507	100.553	100.879	101.554	97.9329	92.385	100.306	101.205	97.9418	99.8728	102.654	109.816	103.347	97.3772	99.0479	94.4311	90.3675	89.59	95.6356	93.8754	96.2716	97.1248	95.4036	91.4096	87.4719	114.791	107.927	100.282	116.58	108.814	95.4682	107.435	92.9568	98.1309
	104.257	103.152	107.844	102.536	103.127	98.0774	102.159	97.7465	101.504	111.089	93.6766	94.2049	98.4423	112.344	111.111	100.507	102.112	100.879	100.252	98.792	92.385	101.252	100.325	98.8486	101.076	102.654	110.796	103.347	96.0057	99.0479	96.2827	90.3675	89.59	95.6356	95.3775	95.7086	97.1248	94.7633	89.7323	88.2671	114.791	107.927	100.282	116.58	108.814	93.3228	107.435	91.8883	98.1309
	105.768	102.511	107.844	101.765	103.127	98.0774	102.159	98.5347	100.644	112.007	93.6766	94.2049	100.249	113.321	111.111	100.507	102.891	100.879	98.9504	100.51	92.9888	101.252	98.5646	98.8486	101.076	102.654	111.777	103.347	97.3772	99.0479	97.2085	92.041	90.6318	95.6356	95.3775	96.2716	96.436	94.123	88.8937	88.2671	114.791	107.927	100.282	115.808	108.814	92.2501	106.524	89.7514	98.1309
	104.257	102.511	107.039	101.765	102.462	97.2017	102.159	98.5347	98.9232	111.089	93.6766	93.4912	101.152	114.298	110.2	101.733	103.671	100.879	98.9504	101.369	92.385	101.252	98.5646	98.8486	101.076	103.954	112.757	103.347	94.6342	99.7358	99.0601	92.041	91.6735	96.5294	95.3775	95.7086	96.436	94.123	88.0551	88.2671	116.353	107.927	99.2888	115.808	109.554	91.1775	107.435	88.6829	97.1873
	105.768	102.511	107.039	103.307	101.796	98.0774	102.159	97.7465	96.3426	112.007	93.6766	92.7775	101.152	114.298	111.111	102.959	104.45	99.2908	100.252	102.228	91.7812	100.306	96.8045	98.8486	102.279	105.253	114.718	104.36	91.8912	99.7358	100.912	92.8777	92.7153	100.105	94.6264	96.2716	95.7472	93.4827	87.2165	89.0623	117.134	107.927	98.2959	115.808	109.554	90.1048	108.345	87.6145	96.2438
	105.012	101.23	107.039	103.307	101.131	98.9531	104.123	97.7465	95.4824	112.925	94.5056	92.0638	100.249	111.367	110.2	102.959	104.45	98.4965	100.252	102.228	91.1773	99.3594	95.9245	98.8486	103.483	103.954	116.679	103.347	90.5197	99.7358	102.763	92.041	93.757	104.573	94.6264	95.1456	95.0583	92.8424	86.3778	89.8575	117.134	107.927	98.2959	115.036	110.294	90.1048	105.614	86.546	96.2438
	104.257	100.589	107.844	104.078	100.466	98.9531	105.106	96.9582	94.6222	112.925	93.6766	92.0638	98.4423	109.413	110.2	101.733	105.23	99.2908	101.554	103.087	89.3659	98.4131	95.9245	98.8486	104.686	103.954	118.64	103.347	89.1482	100.424	103.689	92.8777	93.757	109.042	95.3775	95.1456	94.3695	92.8424	86.3778	90.6527	116.353	108.777	98.2959	114.264	111.035	90.1048	102.882	86.546	97.1873
	104.257	99.3079	107.039	103.307	100.466	98.9531	107.07	96.9582	95.4824	112.007	93.6766	92.0638	97.5391	108.436	109.289	100.507	105.23	100.085	101.554	103.087	87.5544	97.4668	96.8045	98.8486	102.279	102.654	120.601	102.334	90.5197	100.424	103.689	92.041	94.7987	113.511	95.3775	95.7086	93.6807	92.8424	87.2165	90.6527	115.572	108.777	98.2959	112.72	111.035	91.1775	101.972	86.546	97.1873
	102.746	98.0265	107.039	102.536	100.466	98.9531	108.053	96.9582	96.3426	111.089	93.6766	92.0638	97.5391	108.436	109.289	98.0559	105.23	100.085	101.554	103.087	86.3468	96.5205	96.8045	99.7555	99.8728	103.954	122.562	101.32	89.1482	100.424	103.689	92.8777	94.7987	117.087	97.6305	96.2716	92.9918	92.2021	87.2165	90.6527	114.791	107.927	99.2888	111.948	112.515	91.1775	101.061	87.6145	96.2438
[truncated: 7,407 more rows]
[truncated: 43 more columns]

## Sheet: C (female)
Region	Top 19	Top 20	Temporal Right 16	Top 23	Temporal Right 21	Temporal Left 1	Temporal Left 9	Temporal Left 24	Temporal Left 23	Temporal Right 5	Temporal Right 9	Top 24	Top 13	Top 22	103.391	Temporal Right 18	Temporal Left 18	Top 12	Top 11	Temporal Left 25	Temporal Right 3	Temporal Right 8	Temporal Left 11	Temporal Right 20	Temporal Right 25	Top 9	Crown 12	Top 18	Temporal Right 7	Top 6	Temporal Left 17	Temporal Right 14	Temporal Right 17	Top 8	Top 3	Temporal Right 4	Top 2	Crown 5	Top 14	Crown 17	Temporal Left 4	Temporal Left 13	Temporal Left 8	Temporal Left 12	Temporal Right 12	Temporal Left 14	Temporal Left 19	Temporal Right 24	Crown 2
[truncated: 15,490 more rows]
[truncated: 51 more columns]

[truncated: 1 more sheets: D (left)]
