# Supplementary material for: Quantitative mapping of human hair greying and reversal in relation to life stress
Source: eLife. 2021 Jun 22;10:e67437. doi: 10.7554/eLife.67437 (PMC8219384; doi:10.7554/eLife.67437)
Supplement: Supplementary file 1. — Fold changes are average abundance values for white relative to dark hair shafts (HS), determined by LC-MS/MS proteomics on matched white and dark HS from female and male individuals. The last column indicates overlap with known mitochondrial proteins listed in MitoCarta 2.0 and other database annotations. [file elife-67437-supp1.xlsx]

## Sheet: Sheet1
LC-MS/MS proteomics Experiment 1
Gene Name	Fold change	Protein	MitoCarta 2.0
DOWNREGULATED (<0.8-fold)
TTR	0.53	Transthyretin
TAGLN2	0.56	Isoform 2 of Transgelin-2
PLD3	0.58	Phospholipase D3
CTSD	0.6	Cathepsin D
KRTAP3-3	0.62	Keratin-associated protein 3-3
HEXB	0.62	Beta-hexosaminidase subunit beta
HNRNPM	0.63	Isoform 2 of Heterogeneous nuclear ribonucleoprotein M
CRIP2	0.63	Isoform 2 of Cysteine-rich protein 2
MT-CO2	0.65	Cytochrome c oxidase subunit 2	Yes
LAMP1	0.66	Lysosome-associated membrane glycoprotein 1
KRTAP3-1	0.68	Keratin-associated protein 3-1
PHB	0.68	Prohibitin	Yes
S100A9	0.71	Protein S100-A9
SLC40A1	0.71	Solute carrier family 40 member 1
KRTAP26-1	0.73	Keratin-associated protein 26-1
CXADR	0.73	Isoform 2 of Coxsackievirus and adenovirus receptor
HNRNPD	0.75	Isoform 2 of Heterogeneous nuclear ribonucleoprotein D0
KRTAP19-5	0.77	Keratin-associated protein 19-5
KRTAP9-6	0.77	Keratin-associated protein 9-6
GNB1	0.77	Isoform 2 of Guanine nucleotide-binding protein G(I)/G(S)/G(T) subunit beta-1
UFM1	0.78	Ubiquitin-fold modifier 1
VDAC1	0.79	Voltage-dependent anion-selective channel protein 1	Yes
KRTAP4-3	0.79	Keratin-associated protein 4-3
UPREGULATED (>1.5-fold)
PPIA	1.52	Peptidyl-prolyl cis-trans isomerase A
PGK 1	1.52	Isoform 2 of Phosphoglycerate kinase 1
ACAA1	1.54	3-ketoacyl-CoA thiolase, peroxisomal	Yes
GSDMA	1.55	Gasdermin-A
RPS3A	1.55	40S ribosomal protein S3a
RPS8	1.55	40S ribosomal protein S8
BCAP31	1.55	Isoform 2 of B-cell receptor-associated protein 31
DHCR7	1.55	7-dehydrocholesterol reductase
RPS3	1.55	40S ribosomal protein S3	Yes
CDC42	1.56	Cell division control protein 42 homolog
ASPRV1	1.57	Retroviral-like aspartic protease 1
APOD	1.59	Apolipoprotein D
MDH1	1.6	Isoform 2 of Malate dehydrogenase, cytoplasmic	Yes
RPL12	1.6	60S ribosomal protein L12
YPEL5	1.63	Protein yippee-like 5
EEF2	1.64	Elongation factor 2
PRDX2	1.65	Peroxiredoxin-2	Yes
RPL30	1.66	60S ribosomal protein L30
RPL37A	1.67	60S ribosomal protein L37a
H1F0	1.7	Isoform 2 of Histone H1.0
RBM14	1.72	RNA-binding protein 14
RPS7	1.72	40S ribosomal protein S7
RAN	1.75	GTP-binding nuclear protein Ran
CPT1A	1.75	Isoform 2 of Carnitine O-palmitoyltransferase 1, liver isoform	Yes
GDI2	1.75	Isoform 2 of Rab GDP dissociation inhibitor beta
RPL8	1.77	60S ribosomal protein L8
HADHB	1.77	Isoform 2 of Trifunctional enzyme subunit beta, mitochondrial	Yes
EEF1G	1.77	Elongation factor 1-gamma
YWHAE	1.79	14-3-3 protein epsilon
RACK1	1.81	Receptor of activated protein C kinase 1	Yes
RPSA	1.82	40S ribosomal protein SA
PITHD1	1.82	Isoform 2 of PITH domain-containing protein 1
SERPINB13	1.83	Serpin B13
HK1	1.85	Isoform 2 of Hexokinase-1	Yes
CAPZB	1.89	Isoform 2 of F-actin-capping protein subunit beta
KRT17	1.89	Keratin, type I cytoskeletal 17
UQCRC1	1.9	Cytochrome b-c1 complex subunit 1, mitochondrial	Yes
RPL22	1.9	60S ribosomal protein L22
PPA1	1.93	Inorganic pyrophosphatase
GARS	1.94	Glycine--tRNA ligase	Yes
VCP	1.95	Transitional endoplasmic reticulum ATPase
CFL1	2	Cofilin-1
COMT	2.07	Isoform Soluble of Catechol O-methyltransferase	Yes
RPS27A	2.08	Ubiquitin-40S ribosomal protein S27a
RPL13A	2.13	60S ribosomal protein L13a
RPS2	2.14	40S ribosomal protein S2
HSP90B1	2.14	Endoplasmin	Yes
ASS1	2.19	Argininosuccinate synthase	Yes
RPS15A	2.29	40S ribosomal protein S15a	Yes
ECHDC1	2.34	Isoform 2 of Ethylmalonyl-CoA decarboxylase	Yes
HSP90AB1	2.38	Heat shock protein HSP 90-beta
ATP6V1B2	2.42	V-type proton ATPase subunit B, brain isoform
EIF2S3B	2.57	Eukaryotic translation initiation factor 2 subunit 3B
ACOT7	2.65	Isoform 4 of Cytosolic acyl coenzyme A thioester hydrolase	Yes
SOD1	2.66	Superoxide dismutase [Cu-Zn]	Yes
CSNK1D	2.79	Isoform 2 of Casein kinase I isoform delta
RPL7	2.81	60S ribosomal protein L7
RPS4X	2.86	40S ribosomal protein S4, X isoform
PLEC	2.88	Isoform 2 of Plectin
RPL6	2.98	60S ribosomal protein L6
PREP	3	Prolyl endopeptidase
G6PD	3.13	Isoform Long of Glucose-6-phosphate 1-dehydrogenase
GGCT	3.21	Gamma-glutamylcyclotransferase
PHGDH	3.54	D-3-phosphoglycerate dehydrogenase
CLTC	3.75	Isoform 2 of Clathrin heavy chain 1
ANXA1	4.13	Annexin A1
FASN	7.5	Fatty acid synthase	Yes
