# Supplementary material for: Quantitative mapping of human hair greying and reversal in relation to life stress
Source: eLife. 2021 Jun 22;10:e67437. doi: 10.7554/eLife.67437 (PMC8219384; doi:10.7554/eLife.67437)
Supplement: Supplementary file 3. — Proteins undetected in dark hairs but detected in white HS from three female and three male individuals. Because these proteins are undetected in dark hairs, the fold change is infinity. The last column indicates overlap with known mitochondrial proteins listed in MitoCarta 2.0 and other database annotations. [file elife-67437-supp3.xlsx]

## Sheet: Sheet1
LC-MS/MS proteomics Experiment 2 (induced proteins)
Gene Name	Protein	MitoCarta 2.0
UNDETECTED IN DARK
HSPD1	60 kDa heat shock protein, mitochondrial	Yes
ATP5A1	ATP synthase subunit alpha, mitochondrial	Yes
LDHB	L-lactate dehydrogenase B chain	Yes
TPI1	Triosephosphate isomerase	Yes
HIST1H1B	Histone H1.5
RPS13	40S ribosomal protein S13
LYG2	Lysozyme g-like protein 2
LAMP1	Lysosome-associated membrane glycoprotein 1
PLCD1	1-phosphatidylinositol 4,5-bisphosphate phosphodiesterase delta-1
YWHAQ	14-3-3 protein theta
GJA1	Gap junction alpha-1 protein
unknown	N/A
HSPA8	Heat shock cognate 71 kDa protein
RTN3	Reticulon-3
MDH2	Malate dehydrogenase, mitochondrial	Yes
PGK1	Phosphoglycerate kinase 1
