# Supplementary material for: Quantitative mapping of human hair greying and reversal in relation to life stress
Source: eLife. 2021 Jun 22;10:e67437. doi: 10.7554/eLife.67437 (PMC8219384; doi:10.7554/eLife.67437)
Supplement: Supplementary file 4. — Model parameters, descriptions, and values used in simulation models shown in Figure 5. Default values in the online simulation match those of Figure 5E and F. [file elife-67437-supp4.xlsx]

## Sheet: Sheet1
Hair greying simulation model parameters
Parameter	Description	Figure 5B	Figure 5C,D Average Greyer	Figure 5D Early Greyer	Figure 5D Late Greyer	Figure 5E	Figure 5F
Beta1	Fixed rate of increase in aging factor (slope)	16	16	16	16	16	16
Beta2	Sensitivity to stress (slope)	0	0	0	0	4	4
Sigma0	SD of aging factor value at x=0	10	10	10	10	10	10
Sigma1	SD of aging factor rate	13	13	25	8	13	13
Sigma2	SD of greying loading at age 0	0	0	0	0	0	0
Sigmae	SD of random fluctuation	0	10	10	10	0	10
Rho01	Correlation between greying loading at age 0 and aging factor rate	0	0	0	0	0	0
Rho02	Correlation between greying loading at age 0 and stress sensitivity rate	0	0	0	0	0	0
Rho12	Correlation between aging factor rate and stress sensitivity rate	0	0	0	0	0	0
Window width	Pre-set number of years accumulating stress before age of evaluation	0	0	0	0	5	5
Stress start time	Onset of stressor	0	0	0	0	20,50	20,50
Stress strength	Strength of stressor	0	0	0	0	10,10	10,10
Stress length	Duration of stressor	0	0	0	0	1,1	1,1
Threshold	Greying threshold	1920	1920	1920	1920	1920	1920
N	Number of hairs in simulation	1000	1000	1000	1000	1000	1000
Seed number	Simulation seed number	2019	2019	2019	2019	2019	2019
Percent of hairs on plot	Proportion of all hairs graphed on simulation output plot	10	10	10	10	10	10
